# Supplementary material
Source: HighWire-hosted journal article supplement (https://erj.ersjournals.com/content/52/3/1701556)
Supplement: inline-supplementary-material-2 [file inline-supplementary-material-2.pdf]

**Table S4 mRNAs differentially expressed with CMH and their statistics**

| gene     | Moderate/severe CMH vs No CMH<br>(definition A) |       |         |       | Moderate/severe CMH vs No CMH<br>(definition B) |       |         |
|----------|-------------------------------------------------|-------|---------|-------|-------------------------------------------------|-------|---------|
|          | t-value                                         | FC    | p-value | FDR   | t-value                                         | FC    | p-value |
| AIG1     | 4.667                                           | 1.355 | 0.000   | 0.225 | 2.548                                           | 1.213 | 0.014   |
| LRRC8B   | 4.498                                           | 1.487 | 0.000   | 0.225 | 3.117                                           | 1.359 | 0.003   |
| ROD1     | 4.410                                           | 1.538 | 0.000   | 0.225 | 3.515                                           | 1.461 | 0.001   |
| OSBPL3   | 4.402                                           | 1.671 | 0.000   | 0.225 | 3.130                                           | 1.522 | 0.003   |
| RC3H1    | 4.345                                           | 1.238 | 0.000   | 0.225 | 2.760                                           | 1.173 | 0.008   |
| RQCD1    | 4.082                                           | 1.264 | 0.000   | 0.231 | 4.512                                           | 1.316 | 0.000   |
| LIAS     | 4.030                                           | 1.193 | 0.000   | 0.231 | 2.254                                           | 1.124 | 0.029   |
| USP46    | 3.884                                           | 1.270 | 0.000   | 0.231 | 2.608                                           | 1.193 | 0.012   |
| MTF1     | 3.873                                           | 1.289 | 0.000   | 0.231 | 2.842                                           | 1.227 | 0.006   |
| CSNK1A1  | 3.834                                           | 1.400 | 0.000   | 0.231 | 2.724                                           | 1.298 | 0.009   |
| ZDHHC13  | 3.795                                           | 1.579 | 0.000   | 0.231 | 2.974                                           | 1.468 | 0.005   |
| MARVELD2 | 3.728                                           | 1.554 | 0.000   | 0.231 | 3.236                                           | 1.478 | 0.002   |
| FAM60A   | 3.722                                           | 1.627 | 0.001   | 0.231 | 3.614                                           | 1.637 | 0.001   |
| NEBL     | 3.696                                           | 1.368 | 0.001   | 0.231 | 2.757                                           | 1.277 | 0.008   |
| HNRNPF   | 3.654                                           | 1.229 | 0.001   | 0.231 | 2.967                                           | 1.210 | 0.005   |
| WDR45L   | 3.638                                           | 1.239 | 0.001   | 0.231 | 3.640                                           | 1.256 | 0.001   |
| ADAT1    | 3.629                                           | 1.204 | 0.001   | 0.231 | 3.165                                           | 1.200 | 0.003   |
| SRI      | 3.617                                           | 1.534 | 0.001   | 0.231 | 2.702                                           | 1.435 | 0.009   |
| SS18     | 3.614                                           | 1.253 | 0.001   | 0.231 | 3.093                                           | 1.241 | 0.003   |
| TTC39C   | 3.584                                           | 1.325 | 0.001   | 0.231 | 3.012                                           | 1.283 | 0.004   |
| LRBA     | 3.580                                           | 1.360 | 0.001   | 0.231 | 2.751                                           | 1.297 | 0.008   |
| WDR51B   | 3.574                                           | 1.322 | 0.001   | 0.231 | 3.196                                           | 1.301 | 0.002   |
| TMEM14B  | 3.571                                           | 1.396 | 0.001   | 0.231 | 2.837                                           | 1.322 | 0.007   |
| KATNA1   | 3.570                                           | 1.338 | 0.001   | 0.231 | 3.588                                           | 1.365 | 0.001   |
| NFX1     | 3.568                                           | 1.212 | 0.001   | 0.231 | 2.588                                           | 1.163 | 0.013   |
| GTF2E2   | 3.562                                           | 1.297 | 0.001   | 0.231 | 2.936                                           | 1.259 | 0.005   |
| USP6NL   | 3.559                                           | 1.248 | 0.001   | 0.231 | 3.508                                           | 1.257 | 0.001   |
| POLR2H   | 3.547                                           | 1.287 | 0.001   | 0.231 | 2.527                                           | 1.220 | 0.015   |
| AZIN1    | 3.530                                           | 1.604 | 0.001   | 0.231 | 2.158                                           | 1.398 | 0.036   |
| FANCF    | 3.514                                           | 1.415 | 0.001   | 0.231 | 2.982                                           | 1.396 | 0.004   |
| DYRK1A   | 3.490                                           | 1.232 | 0.001   | 0.231 | 2.094                                           | 1.155 | 0.041   |
| C3orf52  | 3.477                                           | 1.530 | 0.001   | 0.231 | 2.461                                           | 1.385 | 0.017   |
| SAT1     | 3.475                                           | 1.363 | 0.001   | 0.231 | 2.330                                           | 1.254 | 0.024   |
| IDH3A    | 3.473                                           | 1.355 | 0.001   | 0.231 | 3.234                                           | 1.360 | 0.002   |
| PRDM4    | 3.467                                           | 1.160 | 0.001   | 0.231 | 3.262                                           | 1.167 | 0.002   |
| B3GNT5   | 3.457                                           | 1.816 | 0.001   | 0.231 | 2.796                                           | 1.691 | 0.007   |
| FLJ11506 | 3.451                                           | 1.207 | 0.001   | 0.231 | 3.179                                           | 1.198 | 0.003   |
| INPP4B   | 3.446                                           | 1.296 | 0.001   | 0.231 | 2.425                                           | 1.233 | 0.019   |
| CSNK2A1  | 3.431                                           | 1.207 | 0.001   | 0.231 | 2.483                                           | 1.166 | 0.016   |
| RAB28    | 3.429                                           | 1.395 | 0.001   | 0.231 | 2.087                                           | 1.264 | 0.042   |
| KIAA0232 | 3.420                                           | 1.293 | 0.001   | 0.231 | 2.193                                           | 1.208 | 0.033   |
| C11orf30 | 3.419                                           | 1.279 | 0.001   | 0.231 | 2.989                                           | 1.262 | 0.004   |
| COMMD2   | 3.413                                           | 1.317 | 0.001   | 0.231 | 2.462                                           | 1.258 | 0.017   |
| SNX24    | 3.374                                           | 1.284 | 0.001   | 0.231 | 2.618                                           | 1.237 | 0.012   |
| MRP63    | 3.370                                           | 1.194 | 0.001   | 0.231 | 2.804                                           | 1.166 | 0.007   |

|              |       |       |       |       |       |       |       |
|--------------|-------|-------|-------|-------|-------|-------|-------|
| NUP153       | 3.366 | 1.244 | 0.001 | 0.231 | 3.146 | 1.242 | 0.003 |
| WDR33        | 3.361 | 1.169 | 0.001 | 0.231 | 2.188 | 1.131 | 0.033 |
| GFM2         | 3.351 | 1.407 | 0.002 | 0.231 | 2.452 | 1.313 | 0.018 |
| SMG7         | 3.346 | 1.218 | 0.002 | 0.231 | 3.030 | 1.207 | 0.004 |
| LOC100133333 | 3.337 | 1.560 | 0.002 | 0.231 | 2.090 | 1.360 | 0.042 |
| CXorf39      | 3.336 | 1.174 | 0.002 | 0.231 | 3.430 | 1.183 | 0.001 |
| C17orf75     | 3.334 | 1.289 | 0.002 | 0.231 | 2.310 | 1.221 | 0.025 |
| H2AFY        | 3.327 | 1.190 | 0.002 | 0.231 | 2.993 | 1.178 | 0.004 |
| LARP5        | 3.313 | 1.235 | 0.002 | 0.231 | 2.437 | 1.179 | 0.018 |
| MAP3K7IP3    | 3.310 | 1.206 | 0.002 | 0.231 | 3.080 | 1.202 | 0.003 |
| MAL2         | 3.308 | 1.583 | 0.002 | 0.231 | 3.160 | 1.538 | 0.003 |
| DNAJC16      | 3.306 | 1.279 | 0.002 | 0.231 | 2.986 | 1.260 | 0.004 |
| CDS1         | 3.298 | 1.512 | 0.002 | 0.231 | 2.138 | 1.349 | 0.037 |
| PPP4R1       | 3.295 | 1.344 | 0.002 | 0.231 | 2.722 | 1.299 | 0.009 |
| LCOR         | 3.291 | 1.256 | 0.002 | 0.231 | 2.961 | 1.246 | 0.005 |
| DAPP1        | 3.290 | 1.491 | 0.002 | 0.231 | 2.009 | 1.312 | 0.050 |
| DAZAP2       | 3.289 | 1.291 | 0.002 | 0.231 | 2.443 | 1.234 | 0.018 |
| SEMA3A       | 3.276 | 1.793 | 0.002 | 0.234 | 2.891 | 1.756 | 0.006 |
| TRIM37       | 3.270 | 1.236 | 0.002 | 0.237 | 2.944 | 1.230 | 0.005 |
| UBL3         | 3.267 | 1.486 | 0.002 | 0.238 | 2.167 | 1.343 | 0.035 |
| PGM2L1       | 3.264 | 1.460 | 0.002 | 0.238 | 2.635 | 1.388 | 0.011 |
| CSTB         | 3.257 | 1.402 | 0.002 | 0.238 | 2.758 | 1.334 | 0.008 |
| CNOT7        | 3.257 | 1.354 | 0.002 | 0.238 | 2.057 | 1.242 | 0.045 |
| MRPS21       | 3.255 | 1.178 | 0.002 | 0.238 | 2.705 | 1.162 | 0.009 |
| ERLIN1       | 3.254 | 1.415 | 0.002 | 0.238 | 3.540 | 1.451 | 0.001 |
| LOC100133422 | 3.249 | 1.307 | 0.002 | 0.239 | 2.344 | 1.223 | 0.023 |
| AMPD3        | 3.238 | 1.285 | 0.002 | 0.241 | 2.369 | 1.221 | 0.022 |
| EIF5         | 3.227 | 1.265 | 0.002 | 0.242 | 2.251 | 1.197 | 0.029 |
| MUC15        | 3.202 | 2.038 | 0.002 | 0.243 | 2.659 | 1.892 | 0.011 |
| TC2N         | 3.198 | 1.400 | 0.002 | 0.243 | 2.100 | 1.277 | 0.041 |
| MRPS31       | 3.193 | 1.258 | 0.002 | 0.243 | 2.385 | 1.218 | 0.021 |
| USP42        | 3.192 | 1.147 | 0.002 | 0.243 | 3.559 | 1.175 | 0.001 |
| PEX13        | 3.191 | 1.271 | 0.002 | 0.243 | 2.557 | 1.225 | 0.014 |
| PIGU         | 3.182 | 1.335 | 0.003 | 0.243 | 3.588 | 1.390 | 0.001 |
| DPY30        | 3.177 | 1.340 | 0.003 | 0.243 | 2.199 | 1.250 | 0.033 |
| KIAA1279     | 3.174 | 1.297 | 0.003 | 0.243 | 2.876 | 1.279 | 0.006 |
| CAST         | 3.174 | 1.288 | 0.003 | 0.243 | 2.891 | 1.283 | 0.006 |
| C10orf57     | 3.160 | 1.567 | 0.003 | 0.243 | 2.208 | 1.402 | 0.032 |
| TRIM2        | 3.160 | 1.312 | 0.003 | 0.243 | 2.155 | 1.223 | 0.036 |
| LGALS3       | 3.158 | 1.297 | 0.003 | 0.243 | 2.765 | 1.266 | 0.008 |
| RAB2B        | 3.151 | 1.174 | 0.003 | 0.243 | 2.047 | 1.133 | 0.046 |
| C9orf6       | 3.148 | 1.378 | 0.003 | 0.243 | 2.375 | 1.305 | 0.021 |
| DAP3         | 3.145 | 1.199 | 0.003 | 0.243 | 2.894 | 1.197 | 0.006 |
| IPMK         | 3.131 | 1.361 | 0.003 | 0.244 | 2.319 | 1.283 | 0.025 |
| ELF1         | 3.109 | 1.254 | 0.003 | 0.244 | 2.594 | 1.225 | 0.012 |
| IMPA1        | 3.102 | 1.419 | 0.003 | 0.244 | 2.491 | 1.348 | 0.016 |
| DOPEY1       | 3.099 | 1.232 | 0.003 | 0.244 | 2.118 | 1.181 | 0.039 |
| TDP1         | 3.096 | 1.193 | 0.003 | 0.244 | 3.002 | 1.202 | 0.004 |
| UTX          | 3.094 | 1.283 | 0.003 | 0.244 | 3.051 | 1.305 | 0.004 |
| FYTTD1       | 3.091 | 1.281 | 0.003 | 0.244 | 2.521 | 1.250 | 0.015 |

|          |       |       |       |       |       |       |       |
|----------|-------|-------|-------|-------|-------|-------|-------|
| ZNF410   | 3.087 | 1.189 | 0.003 | 0.244 | 3.364 | 1.223 | 0.001 |
| IPP      | 3.087 | 1.346 | 0.003 | 0.244 | 2.678 | 1.313 | 0.010 |
| CHD7     | 3.087 | 1.171 | 0.003 | 0.244 | 2.719 | 1.164 | 0.009 |
| METTL5   | 3.083 | 1.354 | 0.003 | 0.244 | 2.072 | 1.249 | 0.043 |
| MIS12    | 3.080 | 1.349 | 0.003 | 0.244 | 2.268 | 1.284 | 0.028 |
| TMEM154  | 3.075 | 1.611 | 0.003 | 0.244 | 2.388 | 1.485 | 0.021 |
| RPP40    | 3.067 | 1.237 | 0.003 | 0.244 | 2.363 | 1.187 | 0.022 |
| STAM2    | 3.064 | 1.361 | 0.004 | 0.244 | 2.469 | 1.320 | 0.017 |
| TAX1BP1  | 3.063 | 1.400 | 0.004 | 0.244 | 2.476 | 1.353 | 0.017 |
| USP10    | 3.060 | 1.283 | 0.004 | 0.244 | 3.043 | 1.293 | 0.004 |
| OXNAD1   | 3.060 | 1.174 | 0.004 | 0.244 | 2.444 | 1.160 | 0.018 |
| ABHD6    | 3.055 | 1.373 | 0.004 | 0.244 | 2.185 | 1.277 | 0.034 |
| CBFB     | 3.055 | 1.211 | 0.004 | 0.244 | 3.389 | 1.248 | 0.001 |
| EPS8     | 3.055 | 1.243 | 0.004 | 0.244 | 2.353 | 1.198 | 0.023 |
| VAPA     | 3.054 | 1.320 | 0.004 | 0.244 | 2.492 | 1.291 | 0.016 |
| DNAJA4   | 3.046 | 1.540 | 0.004 | 0.244 | 2.114 | 1.406 | 0.040 |
| C10orf46 | 3.044 | 1.120 | 0.004 | 0.244 | 2.544 | 1.106 | 0.014 |
| KRAS     | 3.040 | 1.416 | 0.004 | 0.244 | 2.500 | 1.340 | 0.016 |
| CCDC109A | 3.036 | 1.300 | 0.004 | 0.244 | 3.694 | 1.358 | 0.001 |
| ANK3     | 3.034 | 1.295 | 0.004 | 0.244 | 2.402 | 1.260 | 0.020 |
| LZTFL1   | 3.032 | 1.669 | 0.004 | 0.244 | 2.083 | 1.495 | 0.042 |
| MSL3     | 3.030 | 1.182 | 0.004 | 0.244 | 2.193 | 1.145 | 0.033 |
| TAF5L    | 3.021 | 1.156 | 0.004 | 0.244 | 2.608 | 1.137 | 0.012 |
| PCSK5    | 3.017 | 1.436 | 0.004 | 0.244 | 2.228 | 1.338 | 0.030 |
| PARD6B   | 3.014 | 1.186 | 0.004 | 0.244 | 2.080 | 1.149 | 0.043 |
| TOMM34   | 3.012 | 1.330 | 0.004 | 0.244 | 2.716 | 1.305 | 0.009 |
| WDR26    | 3.002 | 1.249 | 0.004 | 0.244 | 2.504 | 1.241 | 0.016 |
| VDAC3    | 2.999 | 1.330 | 0.004 | 0.244 | 2.262 | 1.265 | 0.028 |
| RTCD1    | 2.999 | 1.229 | 0.004 | 0.244 | 2.030 | 1.170 | 0.048 |
| C1orf25  | 2.996 | 1.453 | 0.004 | 0.244 | 2.215 | 1.358 | 0.031 |
| CBLB     | 2.981 | 1.236 | 0.004 | 0.244 | 2.064 | 1.176 | 0.044 |
| HIPK3    | 2.978 | 1.294 | 0.004 | 0.244 | 2.639 | 1.301 | 0.011 |
| PLAC8    | 2.975 | 1.825 | 0.005 | 0.244 | 2.105 | 1.629 | 0.040 |
| GLIPR2   | 2.973 | 1.331 | 0.005 | 0.244 | 2.170 | 1.261 | 0.035 |
| FAM149B1 | 2.972 | 1.216 | 0.005 | 0.244 | 2.184 | 1.175 | 0.034 |
| KIAA1012 | 2.972 | 1.315 | 0.005 | 0.244 | 2.771 | 1.320 | 0.008 |
| BTBD9    | 2.970 | 1.273 | 0.005 | 0.244 | 2.222 | 1.225 | 0.031 |
| PSD3     | 2.958 | 1.375 | 0.005 | 0.244 | 2.329 | 1.288 | 0.024 |
| MRPL39   | 2.957 | 1.188 | 0.005 | 0.244 | 3.052 | 1.222 | 0.004 |
| KIAA2018 | 2.955 | 1.286 | 0.005 | 0.244 | 2.417 | 1.249 | 0.019 |
| TDRD7    | 2.954 | 1.240 | 0.005 | 0.244 | 2.408 | 1.211 | 0.020 |
| SLC15A2  | 2.949 | 1.464 | 0.005 | 0.244 | 2.053 | 1.327 | 0.045 |
| RALGPS2  | 2.944 | 1.366 | 0.005 | 0.244 | 3.050 | 1.394 | 0.004 |
| ATXN2    | 2.942 | 1.248 | 0.005 | 0.244 | 2.260 | 1.210 | 0.028 |
| ANXA2    | 2.942 | 1.344 | 0.005 | 0.244 | 3.003 | 1.352 | 0.004 |
| SOD1     | 2.940 | 1.401 | 0.005 | 0.244 | 2.199 | 1.305 | 0.033 |
| SFMBT1   | 2.929 | 1.154 | 0.005 | 0.244 | 2.069 | 1.125 | 0.044 |
| MRPS10   | 2.928 | 1.302 | 0.005 | 0.244 | 2.608 | 1.286 | 0.012 |
| QRSL1    | 2.911 | 1.196 | 0.005 | 0.244 | 2.234 | 1.159 | 0.030 |
| USP9Y    | 2.910 | 1.316 | 0.005 | 0.244 | 2.010 | 1.229 | 0.050 |

|          |       |       |       |       |       |       |       |
|----------|-------|-------|-------|-------|-------|-------|-------|
| ALPK1    | 2.906 | 1.271 | 0.005 | 0.244 | 2.029 | 1.207 | 0.048 |
| USP38    | 2.898 | 1.249 | 0.006 | 0.244 | 2.251 | 1.198 | 0.029 |
| RP2      | 2.898 | 1.211 | 0.006 | 0.244 | 2.064 | 1.156 | 0.044 |
| C1orf110 | 2.894 | 2.249 | 0.006 | 0.244 | 2.301 | 1.992 | 0.026 |
| MOCS3    | 2.891 | 1.304 | 0.006 | 0.244 | 2.451 | 1.263 | 0.018 |
| JHDM1D   | 2.888 | 1.337 | 0.006 | 0.244 | 2.349 | 1.292 | 0.023 |
| KIAA0317 | 2.882 | 1.170 | 0.006 | 0.244 | 2.214 | 1.138 | 0.031 |
| KIAA1468 | 2.876 | 1.247 | 0.006 | 0.244 | 2.339 | 1.212 | 0.023 |
| RNF2     | 2.874 | 1.296 | 0.006 | 0.244 | 2.778 | 1.305 | 0.008 |
| CCNY     | 2.873 | 1.150 | 0.006 | 0.244 | 2.839 | 1.157 | 0.007 |
| ASCC1    | 2.870 | 1.273 | 0.006 | 0.244 | 2.642 | 1.274 | 0.011 |
| MYB      | 2.868 | 1.779 | 0.006 | 0.244 | 2.125 | 1.599 | 0.039 |
| ZNF823   | 2.866 | 1.198 | 0.006 | 0.244 | 3.705 | 1.251 | 0.001 |
| ASXL2    | 2.864 | 1.181 | 0.006 | 0.244 | 2.168 | 1.141 | 0.035 |
| STRBP    | 2.863 | 1.499 | 0.006 | 0.244 | 2.405 | 1.439 | 0.020 |
| IKZF2    | 2.861 | 1.374 | 0.006 | 0.244 | 2.934 | 1.376 | 0.005 |
| DLAT     | 2.858 | 1.218 | 0.006 | 0.244 | 3.782 | 1.306 | 0.000 |
| EZR      | 2.856 | 1.458 | 0.006 | 0.244 | 2.680 | 1.476 | 0.010 |
| RNF6     | 2.853 | 1.296 | 0.006 | 0.244 | 2.865 | 1.314 | 0.006 |
| EIF4G2   | 2.847 | 1.213 | 0.006 | 0.244 | 3.046 | 1.230 | 0.004 |
| TRIP4    | 2.845 | 1.247 | 0.006 | 0.244 | 3.037 | 1.276 | 0.004 |
| PIGF     | 2.844 | 1.457 | 0.006 | 0.244 | 2.214 | 1.365 | 0.031 |
| ZNF33B   | 2.843 | 1.363 | 0.006 | 0.244 | 2.038 | 1.277 | 0.047 |
| SKP2     | 2.840 | 1.220 | 0.007 | 0.244 | 2.179 | 1.174 | 0.034 |
| OMA1     | 2.835 | 1.398 | 0.007 | 0.244 | 2.022 | 1.300 | 0.049 |
| MED6     | 2.830 | 1.268 | 0.007 | 0.244 | 2.119 | 1.210 | 0.039 |
| PBRM1    | 2.827 | 1.213 | 0.007 | 0.244 | 2.761 | 1.219 | 0.008 |
| ADIPOR1  | 2.820 | 1.240 | 0.007 | 0.244 | 2.063 | 1.190 | 0.044 |
| ECHDC1   | 2.819 | 1.328 | 0.007 | 0.244 | 2.889 | 1.352 | 0.006 |
| N4BP1    | 2.815 | 1.193 | 0.007 | 0.244 | 2.602 | 1.172 | 0.012 |
| THRAP3   | 2.814 | 1.199 | 0.007 | 0.244 | 2.192 | 1.166 | 0.033 |
| WDR47    | 2.809 | 1.335 | 0.007 | 0.244 | 2.143 | 1.266 | 0.037 |
| VTA1     | 2.808 | 1.356 | 0.007 | 0.244 | 2.990 | 1.393 | 0.004 |
| HECTD1   | 2.806 | 1.256 | 0.007 | 0.244 | 2.738 | 1.275 | 0.009 |
| TMEM131  | 2.805 | 1.254 | 0.007 | 0.244 | 2.226 | 1.213 | 0.031 |
| NUFIP2   | 2.804 | 1.213 | 0.007 | 0.244 | 2.830 | 1.233 | 0.007 |
| DHRS9    | 2.793 | 1.962 | 0.007 | 0.244 | 2.442 | 1.794 | 0.018 |
| CNOT1    | 2.791 | 1.222 | 0.007 | 0.244 | 2.928 | 1.243 | 0.005 |
| TTC39B   | 2.787 | 1.325 | 0.007 | 0.244 | 2.427 | 1.288 | 0.019 |
| GOLPH3L  | 2.786 | 1.314 | 0.008 | 0.244 | 2.457 | 1.281 | 0.018 |
| C2orf86  | 2.780 | 1.419 | 0.008 | 0.244 | 2.094 | 1.347 | 0.041 |
| CCDC138  | 2.776 | 1.448 | 0.008 | 0.244 | 2.330 | 1.412 | 0.024 |
| YWHAE    | 2.775 | 1.300 | 0.008 | 0.244 | 2.630 | 1.300 | 0.011 |
| HSPA4L   | 2.774 | 1.424 | 0.008 | 0.244 | 3.142 | 1.490 | 0.003 |
| HSBP1    | 2.773 | 1.261 | 0.008 | 0.244 | 2.255 | 1.226 | 0.029 |
| INADL    | 2.771 | 1.184 | 0.008 | 0.244 | 2.816 | 1.202 | 0.007 |
| RICS     | 2.769 | 1.357 | 0.008 | 0.244 | 2.721 | 1.331 | 0.009 |
| AFTPH    | 2.766 | 1.154 | 0.008 | 0.244 | 2.637 | 1.153 | 0.011 |
| GCLC     | 2.764 | 1.669 | 0.008 | 0.244 | 3.277 | 1.744 | 0.002 |
| CBLL1    | 2.758 | 1.171 | 0.008 | 0.244 | 3.174 | 1.200 | 0.003 |

|           |       |       |       |       |       |       |       |
|-----------|-------|-------|-------|-------|-------|-------|-------|
| TMEM220   | 2.757 | 1.206 | 0.008 | 0.244 | 2.013 | 1.162 | 0.050 |
| NQO1      | 2.753 | 1.956 | 0.008 | 0.244 | 2.081 | 1.613 | 0.043 |
| ABII      | 2.751 | 1.323 | 0.008 | 0.244 | 2.353 | 1.292 | 0.023 |
| RAB11A    | 2.750 | 1.305 | 0.008 | 0.244 | 2.645 | 1.299 | 0.011 |
| CHMP5     | 2.750 | 1.339 | 0.008 | 0.244 | 2.029 | 1.271 | 0.048 |
| NUPL1     | 2.750 | 1.190 | 0.008 | 0.244 | 2.783 | 1.211 | 0.008 |
| APTX      | 2.749 | 1.132 | 0.008 | 0.244 | 2.229 | 1.120 | 0.030 |
| MLLT4     | 2.747 | 1.344 | 0.008 | 0.244 | 2.118 | 1.294 | 0.039 |
| MUDENG    | 2.746 | 1.371 | 0.008 | 0.244 | 2.025 | 1.292 | 0.048 |
| TMOD3     | 2.745 | 1.297 | 0.008 | 0.244 | 2.357 | 1.254 | 0.022 |
| FRK       | 2.743 | 1.318 | 0.008 | 0.244 | 2.333 | 1.264 | 0.024 |
| MAK10     | 2.742 | 1.209 | 0.008 | 0.244 | 2.607 | 1.214 | 0.012 |
| ZNF607    | 2.741 | 1.266 | 0.008 | 0.244 | 2.108 | 1.227 | 0.040 |
| IFT52     | 2.735 | 1.296 | 0.009 | 0.244 | 2.321 | 1.278 | 0.024 |
| ARID2     | 2.734 | 1.223 | 0.009 | 0.244 | 2.313 | 1.201 | 0.025 |
| SEC23IP   | 2.729 | 1.207 | 0.009 | 0.244 | 2.652 | 1.197 | 0.011 |
| TGFA      | 2.724 | 1.281 | 0.009 | 0.244 | 2.538 | 1.254 | 0.014 |
| EVI1      | 2.723 | 1.271 | 0.009 | 0.244 | 2.198 | 1.223 | 0.033 |
| PDIK1L    | 2.716 | 1.202 | 0.009 | 0.244 | 2.901 | 1.218 | 0.006 |
| TET2      | 2.715 | 1.193 | 0.009 | 0.244 | 2.191 | 1.179 | 0.033 |
| BTBD1     | 2.714 | 1.204 | 0.009 | 0.244 | 2.150 | 1.167 | 0.036 |
| PTGR1     | 2.713 | 1.500 | 0.009 | 0.244 | 3.403 | 1.610 | 0.001 |
| RMND5A    | 2.711 | 1.351 | 0.009 | 0.244 | 2.266 | 1.311 | 0.028 |
| IVNS1ABP  | 2.710 | 1.223 | 0.009 | 0.244 | 3.146 | 1.275 | 0.003 |
| HEBP2     | 2.710 | 1.169 | 0.009 | 0.244 | 2.120 | 1.134 | 0.039 |
| KLHDC10   | 2.706 | 1.179 | 0.009 | 0.244 | 2.244 | 1.161 | 0.029 |
| TRIP13    | 2.705 | 1.245 | 0.009 | 0.244 | 2.725 | 1.256 | 0.009 |
| BAZ1A     | 2.699 | 1.242 | 0.009 | 0.245 | 2.951 | 1.266 | 0.005 |
| TTC9C     | 2.697 | 1.120 | 0.010 | 0.245 | 2.187 | 1.103 | 0.033 |
| CHMP2B    | 2.695 | 1.397 | 0.010 | 0.245 | 2.210 | 1.351 | 0.032 |
| ZNF398    | 2.691 | 1.132 | 0.010 | 0.245 | 3.295 | 1.166 | 0.002 |
| POLR1C    | 2.689 | 1.169 | 0.010 | 0.245 | 2.497 | 1.166 | 0.016 |
| BRP44     | 2.684 | 1.227 | 0.010 | 0.245 | 2.114 | 1.187 | 0.040 |
| S100A11   | 2.683 | 1.303 | 0.010 | 0.245 | 2.011 | 1.229 | 0.050 |
| LOC552889 | 2.683 | 1.197 | 0.010 | 0.245 | 2.283 | 1.190 | 0.027 |
| MORF4L2   | 2.680 | 1.308 | 0.010 | 0.245 | 2.805 | 1.346 | 0.007 |
| EXPH5     | 2.679 | 1.391 | 0.010 | 0.245 | 2.742 | 1.413 | 0.008 |
| LASS6     | 2.679 | 1.320 | 0.010 | 0.245 | 2.103 | 1.268 | 0.041 |
| ZNF561    | 2.679 | 1.206 | 0.010 | 0.245 | 3.067 | 1.243 | 0.003 |
| NBEAL1    | 2.679 | 1.268 | 0.010 | 0.245 | 2.702 | 1.300 | 0.009 |
| HCCS      | 2.678 | 1.254 | 0.010 | 0.245 | 2.831 | 1.262 | 0.007 |
| BAIAP2L1  | 2.667 | 1.390 | 0.010 | 0.247 | 2.010 | 1.308 | 0.050 |
| ANXA4     | 2.658 | 1.306 | 0.011 | 0.248 | 2.078 | 1.265 | 0.043 |
| SGMS2     | 2.658 | 1.395 | 0.011 | 0.248 | 2.382 | 1.361 | 0.021 |
| EIF4G3    | 2.657 | 1.219 | 0.011 | 0.248 | 2.322 | 1.192 | 0.024 |
| FBXO28    | 2.657 | 1.230 | 0.011 | 0.248 | 2.696 | 1.247 | 0.010 |
| CNOT6     | 2.656 | 1.229 | 0.011 | 0.248 | 2.332 | 1.213 | 0.024 |
| DHX32     | 2.655 | 1.275 | 0.011 | 0.248 | 2.179 | 1.238 | 0.034 |
| CLIP1     | 2.654 | 1.214 | 0.011 | 0.248 | 2.939 | 1.243 | 0.005 |
| SAPS3     | 2.654 | 1.138 | 0.011 | 0.248 | 2.317 | 1.127 | 0.025 |

|              |        |        |       |       |        |        |       |
|--------------|--------|--------|-------|-------|--------|--------|-------|
| POLR3C       | 2.650  | 1.163  | 0.011 | 0.248 | 2.958  | 1.184  | 0.005 |
| OTUD4        | 2.643  | 1.358  | 0.011 | 0.248 | 2.184  | 1.329  | 0.034 |
| ANXA2P2      | 2.642  | 1.288  | 0.011 | 0.248 | 2.515  | 1.273  | 0.015 |
| SPAG1        | 2.640  | 1.569  | 0.011 | 0.248 | 2.025  | 1.465  | 0.048 |
| TLE4         | 2.639  | 1.163  | 0.011 | 0.248 | 2.271  | 1.140  | 0.028 |
| TTLL5        | 2.635  | 1.351  | 0.011 | 0.248 | 2.153  | 1.306  | 0.036 |
| PRKAR2A      | 2.634  | 1.153  | 0.011 | 0.248 | 2.704  | 1.162  | 0.009 |
| NEK4         | 2.630  | 1.262  | 0.011 | 0.248 | 2.483  | 1.281  | 0.016 |
| SLMO2        | 2.627  | 1.334  | 0.011 | 0.248 | 2.879  | 1.367  | 0.006 |
| GSK3B        | 2.627  | 1.184  | 0.011 | 0.248 | 2.812  | 1.203  | 0.007 |
| ZNF507       | 2.626  | 1.221  | 0.011 | 0.248 | 2.147  | 1.201  | 0.037 |
| DDX3X        | 2.625  | 1.207  | 0.011 | 0.248 | 2.759  | 1.235  | 0.008 |
| SECISBP2     | 2.624  | 1.174  | 0.012 | 0.248 | 2.442  | 1.184  | 0.018 |
| PAPOLA       | 2.622  | 1.265  | 0.012 | 0.248 | 2.126  | 1.236  | 0.038 |
| MYO6         | 2.620  | 1.246  | 0.012 | 0.248 | 2.483  | 1.231  | 0.016 |
| PDCD6IP      | 2.619  | 1.181  | 0.012 | 0.248 | 2.266  | 1.166  | 0.028 |
| VRK2         | 2.618  | 1.253  | 0.012 | 0.248 | 2.804  | 1.291  | 0.007 |
| C1orf58      | 2.616  | 1.309  | 0.012 | 0.248 | 2.466  | 1.297  | 0.017 |
| NXT2         | 2.615  | 1.259  | 0.012 | 0.248 | 3.511  | 1.345  | 0.001 |
| TESC         | -2.614 | -1.497 | 0.012 | 0.248 | -2.793 | -1.556 | 0.007 |
| ZNF775       | -2.615 | -1.167 | 0.012 | 0.248 | -2.377 | -1.162 | 0.021 |
| ADAD2        | -2.616 | -1.206 | 0.012 | 0.248 | -2.114 | -1.183 | 0.039 |
| MRGPRF       | -2.617 | -1.291 | 0.012 | 0.248 | -2.375 | -1.262 | 0.021 |
| VASN         | -2.624 | -1.189 | 0.011 | 0.248 | -3.115 | -1.240 | 0.003 |
| PLXND1       | -2.624 | -1.375 | 0.011 | 0.248 | -3.365 | -1.457 | 0.001 |
| NAPSA        | -2.625 | -1.202 | 0.011 | 0.248 | -2.605 | -1.214 | 0.012 |
| C1QTNF5      | -2.625 | -1.212 | 0.011 | 0.248 | -3.208 | -1.267 | 0.002 |
| LOC100132755 | -2.626 | -1.313 | 0.011 | 0.248 | -2.181 | -1.279 | 0.034 |
| FAM70B       | -2.629 | -1.264 | 0.011 | 0.248 | -3.429 | -1.354 | 0.001 |
| PARVB        | -2.633 | -1.180 | 0.011 | 0.248 | -3.556 | -1.252 | 0.001 |
| SLC26A3      | -2.634 | -1.161 | 0.011 | 0.248 | -2.181 | -1.147 | 0.034 |
| INMT         | -2.635 | -1.352 | 0.011 | 0.248 | -2.514 | -1.320 | 0.015 |
| CDR2L        | -2.639 | -1.253 | 0.011 | 0.248 | -2.129 | -1.216 | 0.038 |
| MYO7B        | -2.641 | -1.143 | 0.011 | 0.248 | -2.548 | -1.153 | 0.014 |
| PTGER1       | -2.645 | -1.229 | 0.011 | 0.248 | -2.355 | -1.209 | 0.023 |
| GPR124       | -2.647 | -1.301 | 0.011 | 0.248 | -2.751 | -1.312 | 0.008 |
| EXD3         | -2.650 | -1.164 | 0.011 | 0.248 | -2.068 | -1.140 | 0.044 |
| EMILIN3      | -2.650 | -1.178 | 0.011 | 0.248 | -2.373 | -1.174 | 0.022 |
| NRTN         | -2.650 | -1.207 | 0.011 | 0.248 | -2.544 | -1.211 | 0.014 |
| LCN10        | -2.652 | -1.319 | 0.011 | 0.248 | -2.010 | -1.240 | 0.050 |
| TAL1         | -2.654 | -1.218 | 0.011 | 0.248 | -2.643 | -1.222 | 0.011 |
| TMEM38A      | -2.654 | -1.165 | 0.011 | 0.248 | -2.769 | -1.185 | 0.008 |
| GNB5         | -2.658 | -1.113 | 0.011 | 0.248 | -2.097 | -1.090 | 0.041 |
| FLJ42957     | -2.662 | -1.194 | 0.010 | 0.248 | -2.665 | -1.223 | 0.010 |
| FAM9C        | -2.664 | -1.166 | 0.010 | 0.247 | -2.043 | -1.146 | 0.046 |
| LPAR4        | -2.665 | -1.190 | 0.010 | 0.247 | -2.220 | -1.161 | 0.031 |
| LOC100133397 | -2.665 | -1.215 | 0.010 | 0.247 | -2.043 | -1.174 | 0.046 |
| NFATC4       | -2.669 | -1.241 | 0.010 | 0.247 | -2.214 | -1.213 | 0.031 |
| TUBB6        | -2.671 | -1.202 | 0.010 | 0.247 | -2.473 | -1.198 | 0.017 |
| PTMS         | -2.672 | -1.212 | 0.010 | 0.247 | -2.381 | -1.211 | 0.021 |

|              |        |        |       |       |        |        |       |
|--------------|--------|--------|-------|-------|--------|--------|-------|
| FAM69B       | -2.677 | -1.191 | 0.010 | 0.245 | -2.962 | -1.224 | 0.005 |
| KLHL34       | -2.678 | -1.170 | 0.010 | 0.245 | -2.132 | -1.148 | 0.038 |
| NUP210L      | -2.680 | -1.228 | 0.010 | 0.245 | -2.531 | -1.223 | 0.015 |
| NPFFR1       | -2.685 | -1.271 | 0.010 | 0.245 | -2.149 | -1.234 | 0.037 |
| SNORD114-3   | -2.685 | -1.500 | 0.010 | 0.245 | -2.467 | -1.464 | 0.017 |
| SH3BP2       | -2.690 | -1.231 | 0.010 | 0.245 | -3.186 | -1.270 | 0.002 |
| C11orf20     | -2.691 | -1.393 | 0.010 | 0.245 | -2.120 | -1.328 | 0.039 |
| GDNF         | -2.695 | -1.165 | 0.010 | 0.245 | -2.148 | -1.146 | 0.037 |
| IL2RA        | -2.699 | -1.213 | 0.009 | 0.245 | -2.408 | -1.189 | 0.020 |
| FEZ1         | -2.701 | -1.284 | 0.009 | 0.244 | -2.558 | -1.282 | 0.014 |
| DSCR6        | -2.702 | -1.216 | 0.009 | 0.244 | -2.571 | -1.220 | 0.013 |
| PCBP4        | -2.706 | -1.216 | 0.009 | 0.244 | -2.133 | -1.173 | 0.038 |
| EBF3         | -2.706 | -1.307 | 0.009 | 0.244 | -3.397 | -1.363 | 0.001 |
| SNORD116-25  | -2.707 | -1.262 | 0.009 | 0.244 | -2.292 | -1.219 | 0.026 |
| SRY          | -2.708 | -1.124 | 0.009 | 0.244 | -2.629 | -1.131 | 0.011 |
| CHRD         | -2.710 | -1.175 | 0.009 | 0.244 | -2.274 | -1.160 | 0.027 |
| TTYH1        | -2.711 | -1.346 | 0.009 | 0.244 | -2.581 | -1.356 | 0.013 |
| LRRN3        | -2.713 | -1.159 | 0.009 | 0.244 | -2.030 | -1.132 | 0.048 |
| SEMA3G       | -2.713 | -1.247 | 0.009 | 0.244 | -2.918 | -1.280 | 0.005 |
| DHH          | -2.716 | -1.223 | 0.009 | 0.244 | -2.437 | -1.216 | 0.018 |
| ZNF358       | -2.721 | -1.152 | 0.009 | 0.244 | -2.598 | -1.149 | 0.012 |
| RCOR2        | -2.722 | -1.207 | 0.009 | 0.244 | -2.231 | -1.189 | 0.030 |
| FAM43A       | -2.726 | -1.223 | 0.009 | 0.244 | -2.175 | -1.187 | 0.034 |
| SMTN         | -2.727 | -1.431 | 0.009 | 0.244 | -2.424 | -1.385 | 0.019 |
| TNFRSF18     | -2.728 | -1.208 | 0.009 | 0.244 | -2.075 | -1.174 | 0.043 |
| ROBO4        | -2.729 | -1.245 | 0.009 | 0.244 | -3.132 | -1.278 | 0.003 |
| SLC45A1      | -2.730 | -1.221 | 0.009 | 0.244 | -2.036 | -1.177 | 0.047 |
| UAP1L1       | -2.730 | -1.195 | 0.009 | 0.244 | -2.905 | -1.222 | 0.005 |
| IRF2BP1      | -2.734 | -1.147 | 0.009 | 0.244 | -2.513 | -1.144 | 0.015 |
| FBXO43       | -2.737 | -1.149 | 0.009 | 0.244 | -2.131 | -1.128 | 0.038 |
| PKHD1L1      | -2.739 | -1.285 | 0.009 | 0.244 | -2.339 | -1.264 | 0.023 |
| SPNS2        | -2.752 | -1.288 | 0.008 | 0.244 | -2.146 | -1.243 | 0.037 |
| CCDC50       | -2.757 | -1.142 | 0.008 | 0.244 | -2.623 | -1.130 | 0.012 |
| SPTB         | -2.757 | -1.172 | 0.008 | 0.244 | -2.634 | -1.174 | 0.011 |
| COL6A1       | -2.757 | -1.449 | 0.008 | 0.244 | -2.476 | -1.404 | 0.017 |
| SERPINA3     | -2.760 | -3.099 | 0.008 | 0.244 | -2.079 | -2.488 | 0.043 |
| EGFL7        | -2.763 | -1.280 | 0.008 | 0.244 | -3.411 | -1.344 | 0.001 |
| LOC100133142 | -2.765 | -1.271 | 0.008 | 0.244 | -2.416 | -1.265 | 0.019 |
| HEXDC        | -2.767 | -1.158 | 0.008 | 0.244 | -2.667 | -1.158 | 0.010 |
| UNC45B       | -2.767 | -1.220 | 0.008 | 0.244 | -2.401 | -1.188 | 0.020 |
| KLHL4        | -2.772 | -1.183 | 0.008 | 0.244 | -2.771 | -1.189 | 0.008 |
| SPSB4        | -2.773 | -1.232 | 0.008 | 0.244 | -2.040 | -1.190 | 0.047 |
| EBF1         | -2.780 | -1.553 | 0.008 | 0.244 | -2.551 | -1.495 | 0.014 |
| LOC100130518 | -2.781 | -1.173 | 0.008 | 0.244 | -2.149 | -1.146 | 0.036 |
| SNTA1        | -2.782 | -1.207 | 0.008 | 0.244 | -2.307 | -1.192 | 0.025 |
| C9orf4       | -2.783 | -1.193 | 0.008 | 0.244 | -3.379 | -1.241 | 0.001 |
| DAAM2        | -2.786 | -1.418 | 0.008 | 0.244 | -2.203 | -1.324 | 0.032 |
| HSD17B14     | -2.787 | -1.280 | 0.007 | 0.244 | -2.412 | -1.234 | 0.020 |
| SCARNA4      | -2.788 | -1.297 | 0.007 | 0.244 | -2.805 | -1.299 | 0.007 |
| DBN1         | -2.793 | -1.232 | 0.007 | 0.244 | -2.151 | -1.190 | 0.036 |

|           |        |        |       |       |        |        |       |
|-----------|--------|--------|-------|-------|--------|--------|-------|
| ACTRT2    | -2.794 | -1.209 | 0.007 | 0.244 | -2.353 | -1.195 | 0.023 |
| PLVAP     | -2.796 | -1.440 | 0.007 | 0.244 | -2.745 | -1.419 | 0.008 |
| MRC2      | -2.796 | -1.291 | 0.007 | 0.244 | -2.031 | -1.221 | 0.048 |
| SGK493    | -2.806 | -1.571 | 0.007 | 0.244 | -2.284 | -1.471 | 0.027 |
| FLJ46838  | -2.807 | -1.131 | 0.007 | 0.244 | -2.591 | -1.130 | 0.012 |
| GRASP     | -2.809 | -1.295 | 0.007 | 0.244 | -3.290 | -1.338 | 0.002 |
| MN1       | -2.810 | -1.218 | 0.007 | 0.244 | -2.732 | -1.219 | 0.009 |
| GEFT      | -2.812 | -1.443 | 0.007 | 0.244 | -2.304 | -1.354 | 0.025 |
| EFEMP2    | -2.813 | -1.302 | 0.007 | 0.244 | -2.618 | -1.272 | 0.012 |
| PCP2      | -2.814 | -1.202 | 0.007 | 0.244 | -2.953 | -1.234 | 0.005 |
| MPP2      | -2.815 | -1.171 | 0.007 | 0.244 | -2.167 | -1.143 | 0.035 |
| CLEC14A   | -2.820 | -1.415 | 0.007 | 0.244 | -3.219 | -1.449 | 0.002 |
| EDA       | -2.821 | -1.161 | 0.007 | 0.244 | -2.748 | -1.163 | 0.008 |
| ENPEP     | -2.822 | -1.212 | 0.007 | 0.244 | -3.186 | -1.236 | 0.002 |
| GLI1      | -2.824 | -1.213 | 0.007 | 0.244 | -2.963 | -1.242 | 0.005 |
| CRTC1     | -2.825 | -1.186 | 0.007 | 0.244 | -2.758 | -1.193 | 0.008 |
| SMARCD3   | -2.829 | -1.193 | 0.007 | 0.244 | -2.843 | -1.199 | 0.006 |
| SLC17A7   | -2.832 | -1.203 | 0.007 | 0.244 | -2.193 | -1.167 | 0.033 |
| LOC124220 | -2.837 | -2.199 | 0.007 | 0.244 | -2.062 | -1.913 | 0.044 |
| CD22      | -2.838 | -1.380 | 0.007 | 0.244 | -2.304 | -1.324 | 0.025 |
| OPRK1     | -2.839 | -1.157 | 0.007 | 0.244 | -2.786 | -1.167 | 0.008 |
| FBXO44    | -2.840 | -1.175 | 0.007 | 0.244 | -2.742 | -1.174 | 0.008 |
| REN       | -2.844 | -1.157 | 0.006 | 0.244 | -2.256 | -1.142 | 0.028 |
| ProSAPiP1 | -2.844 | -1.261 | 0.006 | 0.244 | -2.126 | -1.204 | 0.038 |
| SNORA20   | -2.844 | -1.455 | 0.006 | 0.244 | -2.123 | -1.320 | 0.039 |
| GGTLC1    | -2.846 | -1.145 | 0.006 | 0.244 | -3.238 | -1.177 | 0.002 |
| LMCD1     | -2.849 | -1.376 | 0.006 | 0.244 | -2.773 | -1.345 | 0.008 |
| NPPB      | -2.854 | -1.219 | 0.006 | 0.244 | -2.824 | -1.230 | 0.007 |
| SLC6A17   | -2.856 | -1.193 | 0.006 | 0.244 | -2.056 | -1.158 | 0.045 |
| KIAA0427  | -2.856 | -1.193 | 0.006 | 0.244 | -2.072 | -1.146 | 0.043 |
| KIAA1045  | -2.861 | -1.186 | 0.006 | 0.244 | -2.473 | -1.175 | 0.017 |
| ADAMTSL1  | -2.862 | -1.247 | 0.006 | 0.244 | -2.182 | -1.190 | 0.034 |
| PGF       | -2.866 | -1.217 | 0.006 | 0.244 | -2.393 | -1.200 | 0.021 |
| RAPGEF3   | -2.867 | -1.351 | 0.006 | 0.244 | -3.671 | -1.434 | 0.001 |
| REXO1     | -2.873 | -1.200 | 0.006 | 0.244 | -2.633 | -1.202 | 0.011 |
| GALNTL1   | -2.876 | -1.376 | 0.006 | 0.244 | -3.391 | -1.466 | 0.001 |
| NENF      | -2.878 | -1.174 | 0.006 | 0.244 | -2.121 | -1.137 | 0.039 |
| ADRA2C    | -2.879 | -1.183 | 0.006 | 0.244 | -2.954 | -1.190 | 0.005 |
| NRGN      | -2.880 | -1.536 | 0.006 | 0.244 | -2.085 | -1.387 | 0.042 |
| TUBB2B    | -2.884 | -1.263 | 0.006 | 0.244 | -2.037 | -1.194 | 0.047 |
| TRIM54    | -2.891 | -1.166 | 0.006 | 0.244 | -2.943 | -1.189 | 0.005 |
| VWA1      | -2.895 | -1.223 | 0.006 | 0.244 | -2.594 | -1.211 | 0.012 |
| LRRC4B    | -2.895 | -1.224 | 0.006 | 0.244 | -2.010 | -1.170 | 0.050 |
| CLTCL1    | -2.897 | -1.131 | 0.006 | 0.244 | -2.177 | -1.100 | 0.034 |
| RASL10B   | -2.898 | -1.221 | 0.006 | 0.244 | -2.677 | -1.217 | 0.010 |
| DLK2      | -2.898 | -1.232 | 0.006 | 0.244 | -2.063 | -1.174 | 0.044 |
| TMEM150   | -2.901 | -1.210 | 0.006 | 0.244 | -2.040 | -1.153 | 0.047 |
| NPDC1     | -2.903 | -1.366 | 0.005 | 0.244 | -2.409 | -1.335 | 0.020 |
| CRH       | -2.906 | -1.161 | 0.005 | 0.244 | -2.205 | -1.138 | 0.032 |
| SLC26A10  | -2.908 | -1.296 | 0.005 | 0.244 | -3.262 | -1.335 | 0.002 |



|           |        |        |       |       |        |        |       |
|-----------|--------|--------|-------|-------|--------|--------|-------|
| DGKG      | -2.909 | -1.283 | 0.005 | 0.244 | -2.885 | -1.293 | 0.006 |
| OR2B11    | -2.913 | -1.231 | 0.005 | 0.244 | -2.248 | -1.192 | 0.029 |
| PKN3      | -2.914 | -1.253 | 0.005 | 0.244 | -2.912 | -1.262 | 0.005 |
| ART4      | -2.915 | -1.205 | 0.005 | 0.244 | -2.365 | -1.181 | 0.022 |
| METTL7B   | -2.918 | -1.210 | 0.005 | 0.244 | -2.726 | -1.208 | 0.009 |
| USHBP1    | -2.925 | -1.162 | 0.005 | 0.244 | -2.436 | -1.154 | 0.018 |
| RNASE1    | -2.927 | -1.574 | 0.005 | 0.244 | -2.612 | -1.522 | 0.012 |
| CLEC11A   | -2.927 | -1.234 | 0.005 | 0.244 | -3.236 | -1.282 | 0.002 |
| FAM65A    | -2.930 | -1.234 | 0.005 | 0.244 | -2.473 | -1.200 | 0.017 |
| ITGA7     | -2.930 | -1.480 | 0.005 | 0.244 | -3.814 | -1.589 | 0.000 |
| ADAMTS10  | -2.932 | -1.244 | 0.005 | 0.244 | -3.176 | -1.254 | 0.003 |
| GNAO1     | -2.932 | -1.283 | 0.005 | 0.244 | -2.137 | -1.221 | 0.037 |
| NFE2      | -2.937 | -1.242 | 0.005 | 0.244 | -2.654 | -1.219 | 0.011 |
| CLDN11    | -2.939 | -1.291 | 0.005 | 0.244 | -3.229 | -1.340 | 0.002 |
| BLOC1S3   | -2.940 | -1.229 | 0.005 | 0.244 | -2.526 | -1.204 | 0.015 |
| A1BG      | -2.954 | -1.197 | 0.005 | 0.244 | -2.225 | -1.160 | 0.031 |
| ADCY1     | -2.956 | -1.147 | 0.005 | 0.244 | -2.816 | -1.146 | 0.007 |
| HAS1      | -2.957 | -1.204 | 0.005 | 0.244 | -3.122 | -1.234 | 0.003 |
| COL4A1    | -2.959 | -1.477 | 0.005 | 0.244 | -2.896 | -1.473 | 0.006 |
| HOXC12    | -2.959 | -1.219 | 0.005 | 0.244 | -2.446 | -1.194 | 0.018 |
| TGFB1I1   | -2.961 | -1.299 | 0.005 | 0.244 | -3.365 | -1.333 | 0.001 |
| ARL10     | -2.961 | -1.230 | 0.005 | 0.244 | -2.142 | -1.177 | 0.037 |
| JPH2      | -2.970 | -1.257 | 0.005 | 0.244 | -2.607 | -1.235 | 0.012 |
| C9orf142  | -2.973 | -1.189 | 0.005 | 0.244 | -2.069 | -1.139 | 0.044 |
| CDX1      | -2.977 | -1.187 | 0.004 | 0.244 | -2.527 | -1.172 | 0.015 |
| EPHB1     | -2.978 | -1.220 | 0.004 | 0.244 | -3.001 | -1.233 | 0.004 |
| TRPV2     | -2.983 | -1.263 | 0.004 | 0.244 | -2.655 | -1.231 | 0.011 |
| HOXD4     | -2.988 | -1.268 | 0.004 | 0.244 | -2.564 | -1.249 | 0.013 |
| FAM71A    | -2.992 | -1.161 | 0.004 | 0.244 | -2.790 | -1.158 | 0.007 |
| SPEG      | -2.993 | -1.244 | 0.004 | 0.244 | -2.993 | -1.258 | 0.004 |
| DLX2      | -2.993 | -1.223 | 0.004 | 0.244 | -2.014 | -1.171 | 0.049 |
| THY1      | -2.993 | -1.435 | 0.004 | 0.244 | -3.574 | -1.550 | 0.001 |
| MAP3K11   | -2.996 | -1.233 | 0.004 | 0.244 | -2.705 | -1.217 | 0.009 |
| LCN6      | -3.003 | -1.312 | 0.004 | 0.244 | -2.397 | -1.245 | 0.020 |
| PITPNM2   | -3.005 | -1.252 | 0.004 | 0.244 | -2.048 | -1.185 | 0.046 |
| SELM      | -3.005 | -1.408 | 0.004 | 0.244 | -2.397 | -1.318 | 0.020 |
| SEMA6B    | -3.007 | -1.276 | 0.004 | 0.244 | -2.643 | -1.252 | 0.011 |
| PTRF      | -3.008 | -1.514 | 0.004 | 0.244 | -2.900 | -1.471 | 0.006 |
| PDLIM7    | -3.018 | -1.334 | 0.004 | 0.244 | -2.727 | -1.308 | 0.009 |
| CLEC3B    | -3.019 | -1.255 | 0.004 | 0.244 | -3.526 | -1.309 | 0.001 |
| SPTA1     | -3.022 | -1.153 | 0.004 | 0.244 | -2.358 | -1.129 | 0.022 |
| GDF11     | -3.025 | -1.290 | 0.004 | 0.244 | -2.779 | -1.286 | 0.008 |
| FBXO10    | -3.027 | -1.176 | 0.004 | 0.244 | -2.889 | -1.186 | 0.006 |
| HES3      | -3.028 | -1.251 | 0.004 | 0.244 | -2.921 | -1.254 | 0.005 |
| CRHBP     | -3.044 | -1.202 | 0.004 | 0.244 | -2.116 | -1.150 | 0.039 |
| HOXB6     | -3.062 | -1.248 | 0.004 | 0.244 | -2.098 | -1.178 | 0.041 |
| RAMP1     | -3.063 | -1.244 | 0.004 | 0.244 | -2.487 | -1.209 | 0.016 |
| WFDC1     | -3.063 | -1.304 | 0.004 | 0.244 | -3.608 | -1.374 | 0.001 |
| RPL23AP71 | -3.064 | -1.241 | 0.004 | 0.244 | -2.166 | -1.184 | 0.035 |
| COL4A2    | -3.066 | -1.413 | 0.003 | 0.244 | -3.547 | -1.483 | 0.001 |

|           |        |        |       |       |        |        |       |
|-----------|--------|--------|-------|-------|--------|--------|-------|
| ADRA1A    | -3.072 | -1.241 | 0.003 | 0.244 | -2.302 | -1.201 | 0.026 |
| PNCK      | -3.082 | -1.223 | 0.003 | 0.244 | -2.639 | -1.210 | 0.011 |
| MAPK11    | -3.083 | -1.230 | 0.003 | 0.244 | -3.402 | -1.264 | 0.001 |
| FSTL3     | -3.084 | -1.270 | 0.003 | 0.244 | -2.618 | -1.225 | 0.012 |
| DYSF      | -3.089 | -1.353 | 0.003 | 0.244 | -4.036 | -1.434 | 0.000 |
| CCDC9     | -3.092 | -1.233 | 0.003 | 0.244 | -2.047 | -1.169 | 0.046 |
| SETD1B    | -3.093 | -1.185 | 0.003 | 0.244 | -2.470 | -1.162 | 0.017 |
| PLAC9     | -3.093 | -1.296 | 0.003 | 0.244 | -2.313 | -1.229 | 0.025 |
| PP13004   | -3.097 | -1.246 | 0.003 | 0.244 | -2.615 | -1.231 | 0.012 |
| SPHK1     | -3.098 | -1.408 | 0.003 | 0.244 | -2.603 | -1.356 | 0.012 |
| SHROOM4   | -3.102 | -1.213 | 0.003 | 0.244 | -2.668 | -1.176 | 0.010 |
| PLXNB3    | -3.103 | -1.295 | 0.003 | 0.244 | -2.717 | -1.296 | 0.009 |
| SNX15     | -3.108 | -1.189 | 0.003 | 0.244 | -2.832 | -1.186 | 0.007 |
| C8orf82   | -3.119 | -1.209 | 0.003 | 0.244 | -2.781 | -1.198 | 0.008 |
| NME4      | -3.131 | -1.197 | 0.003 | 0.244 | -2.027 | -1.137 | 0.048 |
| GAL3ST4   | -3.136 | -1.226 | 0.003 | 0.243 | -3.079 | -1.241 | 0.003 |
| CARD10    | -3.138 | -1.228 | 0.003 | 0.243 | -2.177 | -1.174 | 0.034 |
| TBC1D4    | -3.140 | -1.228 | 0.003 | 0.243 | -2.124 | -1.162 | 0.039 |
| COPZ2     | -3.142 | -1.265 | 0.003 | 0.243 | -3.678 | -1.320 | 0.001 |
| PLK5P     | -3.143 | -1.204 | 0.003 | 0.243 | -3.472 | -1.235 | 0.001 |
| GGT5      | -3.143 | -1.321 | 0.003 | 0.243 | -3.736 | -1.372 | 0.000 |
| LEPRE1    | -3.145 | -1.188 | 0.003 | 0.243 | -2.762 | -1.178 | 0.008 |
| SYDE1     | -3.151 | -1.270 | 0.003 | 0.243 | -2.159 | -1.197 | 0.036 |
| CDH23     | -3.151 | -1.221 | 0.003 | 0.243 | -2.186 | -1.148 | 0.034 |
| CCDC141   | -3.157 | -1.241 | 0.003 | 0.243 | -2.794 | -1.224 | 0.007 |
| DPF3      | -3.160 | -1.248 | 0.003 | 0.243 | -2.487 | -1.208 | 0.016 |
| C20orf160 | -3.161 | -1.232 | 0.003 | 0.243 | -2.905 | -1.219 | 0.005 |
| COL8A2    | -3.168 | -1.211 | 0.003 | 0.243 | -2.411 | -1.179 | 0.020 |
| PPP1R12C  | -3.170 | -1.246 | 0.003 | 0.243 | -2.149 | -1.182 | 0.037 |
| FRAT1     | -3.172 | -1.226 | 0.003 | 0.243 | -2.162 | -1.165 | 0.035 |
| F2RL3     | -3.189 | -1.250 | 0.002 | 0.243 | -2.671 | -1.228 | 0.010 |
| CHST10    | -3.195 | -1.236 | 0.002 | 0.243 | -2.597 | -1.193 | 0.012 |
| FLT4      | -3.202 | -1.254 | 0.002 | 0.243 | -3.553 | -1.284 | 0.001 |
| ACVRL1    | -3.204 | -1.311 | 0.002 | 0.243 | -2.941 | -1.292 | 0.005 |
| FAM101B   | -3.223 | -1.283 | 0.002 | 0.243 | -2.960 | -1.275 | 0.005 |
| EVX2      | -3.229 | -1.236 | 0.002 | 0.242 | -2.280 | -1.193 | 0.027 |
| RASL12    | -3.233 | -1.345 | 0.002 | 0.242 | -2.558 | -1.278 | 0.014 |
| ARPP-21   | -3.242 | -1.160 | 0.002 | 0.239 | -2.014 | -1.108 | 0.049 |
| COL6A2    | -3.252 | -1.343 | 0.002 | 0.238 | -3.040 | -1.330 | 0.004 |
| TLN2      | -3.283 | -1.278 | 0.002 | 0.233 | -2.477 | -1.218 | 0.017 |
| UNKL      | -3.295 | -1.213 | 0.002 | 0.231 | -3.299 | -1.224 | 0.002 |
| SLC22A17  | -3.304 | -1.339 | 0.002 | 0.231 | -2.698 | -1.278 | 0.009 |
| TBX2      | -3.311 | -1.295 | 0.002 | 0.231 | -2.907 | -1.254 | 0.005 |
| GPD1      | -3.312 | -1.393 | 0.002 | 0.231 | -2.222 | -1.289 | 0.031 |
| CNTNAP1   | -3.330 | -1.230 | 0.002 | 0.231 | -2.921 | -1.218 | 0.005 |
| IL34      | -3.338 | -1.213 | 0.002 | 0.231 | -2.429 | -1.170 | 0.019 |
| TNFRSF10D | -3.360 | -1.241 | 0.001 | 0.231 | -2.861 | -1.223 | 0.006 |
| ST3GAL2   | -3.361 | -1.277 | 0.001 | 0.231 | -3.817 | -1.308 | 0.000 |
| LOC375295 | -3.376 | -1.251 | 0.001 | 0.231 | -3.003 | -1.232 | 0.004 |
| MEP1B     | -3.391 | -1.188 | 0.001 | 0.231 | -3.247 | -1.197 | 0.002 |

|              |        |        |       |       |        |        |       |
|--------------|--------|--------|-------|-------|--------|--------|-------|
| ADAM33       | -3.411 | -1.254 | 0.001 | 0.231 | -3.175 | -1.242 | 0.003 |
| SHANK3       | -3.412 | -1.406 | 0.001 | 0.231 | -3.982 | -1.469 | 0.000 |
| RASIP1       | -3.419 | -1.337 | 0.001 | 0.231 | -3.612 | -1.369 | 0.001 |
| DOK1         | -3.430 | -1.288 | 0.001 | 0.231 | -2.829 | -1.252 | 0.007 |
| TPO          | -3.456 | -1.374 | 0.001 | 0.231 | -3.408 | -1.385 | 0.001 |
| SLC25A42     | -3.457 | -1.213 | 0.001 | 0.231 | -3.371 | -1.221 | 0.001 |
| COL5A1       | -3.461 | -1.285 | 0.001 | 0.231 | -3.790 | -1.323 | 0.000 |
| SEP04        | -3.461 | -1.243 | 0.001 | 0.231 | -2.815 | -1.197 | 0.007 |
| LIX1L        | -3.467 | -1.242 | 0.001 | 0.231 | -2.818 | -1.198 | 0.007 |
| NES          | -3.473 | -1.309 | 0.001 | 0.231 | -2.571 | -1.234 | 0.013 |
| FBRSL1       | -3.473 | -1.217 | 0.001 | 0.231 | -2.697 | -1.184 | 0.010 |
| RUSC2        | -3.496 | -1.249 | 0.001 | 0.231 | -3.237 | -1.237 | 0.002 |
| REG1A        | -3.501 | -1.174 | 0.001 | 0.231 | -2.354 | -1.128 | 0.023 |
| FADS3        | -3.503 | -1.328 | 0.001 | 0.231 | -2.115 | -1.204 | 0.039 |
| GUCA1A       | -3.504 | -1.242 | 0.001 | 0.231 | -2.346 | -1.175 | 0.023 |
| FLJ10404     | -3.525 | -1.169 | 0.001 | 0.231 | -2.672 | -1.140 | 0.010 |
| LOC100133404 | -3.536 | -1.379 | 0.001 | 0.231 | -3.358 | -1.382 | 0.002 |
| ACHE         | -3.536 | -1.234 | 0.001 | 0.231 | -3.286 | -1.229 | 0.002 |
| FKBP10       | -3.541 | -1.287 | 0.001 | 0.231 | -2.738 | -1.229 | 0.009 |
| XKR6         | -3.615 | -1.223 | 0.001 | 0.231 | -2.324 | -1.170 | 0.024 |
| LOC401097    | -3.616 | -1.175 | 0.001 | 0.231 | -3.211 | -1.171 | 0.002 |
| SLC2A6       | -3.653 | -1.377 | 0.001 | 0.231 | -2.817 | -1.318 | 0.007 |
| TRAM1L1      | -3.669 | -1.198 | 0.001 | 0.231 | -2.458 | -1.149 | 0.017 |
| SNAPC2       | -3.677 | -1.231 | 0.001 | 0.231 | -2.684 | -1.197 | 0.010 |
| LSM11        | -3.682 | -1.177 | 0.001 | 0.231 | -3.324 | -1.173 | 0.002 |
| PEAR1        | -3.780 | -1.361 | 0.000 | 0.231 | -4.382 | -1.427 | 0.000 |
| PDE9A        | -3.784 | -1.273 | 0.000 | 0.231 | -2.762 | -1.217 | 0.008 |
| RASGRP2      | -3.795 | -1.322 | 0.000 | 0.231 | -3.599 | -1.311 | 0.001 |
| ARHGEF15     | -3.801 | -1.284 | 0.000 | 0.231 | -2.956 | -1.229 | 0.005 |
| SLCO4A1      | -3.822 | -1.355 | 0.000 | 0.231 | -2.288 | -1.226 | 0.026 |
| SCARNA16     | -3.842 | -1.347 | 0.000 | 0.231 | -3.215 | -1.303 | 0.002 |
| RGS11        | -3.852 | -1.303 | 0.000 | 0.231 | -3.830 | -1.328 | 0.000 |
| HTRA1        | -3.867 | -1.516 | 0.000 | 0.231 | -2.372 | -1.330 | 0.022 |
| EDN1         | -3.884 | -1.357 | 0.000 | 0.231 | -2.098 | -1.207 | 0.041 |
| C15orf60     | -3.916 | -1.223 | 0.000 | 0.231 | -2.902 | -1.180 | 0.005 |
| PDGFB        | -3.929 | -1.320 | 0.000 | 0.231 | -3.030 | -1.262 | 0.004 |
| BTN2A3       | -3.961 | -1.355 | 0.000 | 0.231 | -2.889 | -1.296 | 0.006 |
| LIMS2        | -4.010 | -1.326 | 0.000 | 0.231 | -4.282 | -1.342 | 0.000 |
| WTIP         | -4.039 | -1.267 | 0.000 | 0.231 | -2.435 | -1.167 | 0.018 |
| RPL23AP64    | -4.075 | -1.183 | 0.000 | 0.231 | -2.915 | -1.142 | 0.005 |
| C1QTNF1      | -4.222 | -1.328 | 0.000 | 0.225 | -3.233 | -1.270 | 0.002 |
| FAM115A      | -4.223 | -1.386 | 0.000 | 0.225 | -2.518 | -1.266 | 0.015 |
| NKD1         | -4.249 | -1.312 | 0.000 | 0.225 | -2.552 | -1.197 | 0.014 |
| LOC100133388 | -4.265 | -1.306 | 0.000 | 0.225 | -2.072 | -1.173 | 0.043 |

---
