# Supplementary material
Source: HighWire-hosted journal article supplement (https://erj.ersjournals.com/content/52/3/1701556)
Supplement: inline-supplementary-material-3 [file inline-supplementary-material-3.pdf]

## List of gene sets significantly enriched among CMH-upregulated genes (based on definition A)

Databases: Kegg, Biocarta, GO biological processes, GO molecular functions

| NAME                                                      | NES      | NOM p-val | FDR q-val |
|-----------------------------------------------------------|----------|-----------|-----------|
| GO_CILIUM_ORGANIZATION                                    | 3.80065  | 0         | 0         |
| GO_CILIUM_MORPHOGENESIS                                   | 3.716047 | 0         | 0         |
| GO_CILIUM_MOVEMENT                                        | 3.234982 | 0         | 0         |
| GO_CELLULAR_COMPONENT_ASSEMBLY_INVOLVED_IN_MORPHOGENESIS  | 3.163264 | 0         | 0         |
| GO_AXONEME_ASSEMBLY                                       | 3.116444 | 0         | 0         |
| GO_CELL_PROJECTION_ASSEMBLY                               | 2.965269 | 0         | 0         |
| GO_ORGANELLE_ASSEMBLY                                     | 2.922216 | 0         | 0         |
| GO_PROTEIN_TRANSPORT_ALONG_MICROTUBULE                    | 2.922027 | 0         | 0         |
| GO_INTRACILIARY_TRANSPORT                                 | 2.902845 | 0         | 0         |
| GO_AXONEMAL_DYNEIN_COMPLEX_ASSEMBLY                       | 2.902678 | 0         | 0         |
| GO_MICROTUBULE_BUNDLE_FORMATION                           | 2.862911 | 0         | 0         |
| KEGG_PROTEASOME                                           | 2.761147 | 0         | 0         |
| GO_NCRNA_TRANSCRIPTION                                    | 2.530663 | 0         | 3.13E-05  |
| GO_RNA_SPLICING                                           | 2.53542  | 0         | 3.23E-05  |
| GO_MICROTUBULE_BASED_PROCESS                              | 2.543671 | 0         | 3.33E-05  |
| GO_RNA_LOCALIZATION                                       | 2.543767 | 0         | 3.44E-05  |
| GO_TRANSCRIPTION_COUPLED_NUCLEOTIDE_EXCISION_REPAIR       | 2.544786 | 0         | 3.56E-05  |
| KEGG_UBIQUITIN_MEDIATED_PROTEOLYSIS                       | 2.552915 | 0         | 3.69E-05  |
| GO_ANAPHASE_PROMOTING_COMPLEX_DEPENDENT_CATABOLIC_PROCESS | 2.56189  | 0         | 3.83E-05  |
| GO_MRNA_PROCESSING                                        | 2.569639 | 0         | 3.97E-05  |
| GO_CYSTEINE_TYPE_PEPTIDASE_ACTIVITY                       | 2.571137 | 0         | 4.13E-05  |
| GO_THIOL_DEPENDENT_UBIQUITIN_SPECIFIC_PROTEASE_ACTIVITY   | 2.5728   | 0         | 4.30E-05  |
| GO_PROTEIN_COMPLEX_LOCALIZATION                           | 2.586215 | 0         | 4.49E-05  |
| KEGG_RNA_DEGRADATION                                      | 2.589887 | 0         | 4.69E-05  |
| GO_POSITIVE_REGULATION_OF_LIGASE_ACTIVITY                 | 2.600568 | 0         | 4.92E-05  |
| GO_REGULATION_OF_LIGASE_ACTIVITY                          | 2.455815 | 0         | 5.08E-05  |
| GO_PROTEIN_POLYUBIQUITINATION                             | 2.604567 | 0         | 5.16E-05  |
| GO_RNA_PHOSPHODIESTER_BOND_HYDROLYSIS_EXONUCLEOLYTIC      | 2.457357 | 0         | 5.20E-05  |
| GO_MICROTUBULE_CYTOSKELETON_ORGANIZATION                  | 2.457578 | 0         | 5.34E-05  |
| GO_MICROTUBULE_BASED_MOVEMENT                             | 2.608739 | 0         | 5.44E-05  |
| GO_NUCLEAR_EXPORT                                         | 2.472638 | 0         | 5.48E-05  |
| GO_RIBONUCLEOPROTEIN_COMPLEX_SUBUNIT_ORGANIZATION         | 2.477872 | 0         | 5.63E-05  |
| GO_RNA_SPLICING_VIA_TRANSESTERIFICATION_REACTIONS         | 2.613953 | 0         | 5.74E-05  |
| GO_MULTIVESICULAR_BODY_ORGANIZATION                       | 2.492811 | 0         | 5.78E-05  |
| GO_LIGASE_ACTIVITY                                        | 2.516707 | 0         | 5.95E-05  |
| GO_RIBONUCLEOPROTEIN_COMPLEX_BIOGENESIS                   | 2.620134 | 0         | 6.08E-05  |
| GO_REGULATION_OF_CENTROSOME_DUPLICATION                   | 2.524993 | 0         | 6.12E-05  |

|                                                                                                             |          |   |          |
|-------------------------------------------------------------------------------------------------------------|----------|---|----------|
| GO_NONMOTILE_PRIMARY_CILIUM_ASSEMBLY                                                                        | 2.630551 | 0 | 6.45E-05 |
| GO_UBIQUITIN_LIKE_PROTEIN_SPECIFIC_PROTEASE_ACTIVITY                                                        | 2.642457 | 0 | 6.89E-05 |
| GO_REGULATION_OF_CELLULAR_RESPONSE_TO_HEAT                                                                  | 2.443078 | 0 | 6.99E-05 |
| GO_EPITHELIAL_CILIUM_MOVEMENT                                                                               | 2.447186 | 0 | 7.16E-05 |
| GO_PROTEASOMAL_PROTEIN_CATABOLIC_PROCESS                                                                    | 2.451657 | 0 | 7.33E-05 |
| BIOCARTA_PROTEASOME_PATHWAY                                                                                 | 2.693849 | 0 | 7.38E-05 |
| GO_PROTEIN_MODIFICATION_BY_SMALL_PROTEIN_REMOVAL                                                            | 2.708386 | 0 | 7.94E-05 |
| GO_NUCLEOCYTOPLASMIC_TRANSPORTER_ACTIVITY                                                                   | 2.430321 | 0 | 9.16E-05 |
| GO_NCRNA_METABOLIC_PROCESS                                                                                  | 2.418559 | 0 | 1.09E-04 |
| GO_RIBONUCLEOPROTEIN_COMPLEX_LOCALIZATION                                                                   | 2.422681 | 0 | 1.11E-04 |
| GO_DNA_REPAIR                                                                                               | 2.397014 | 0 | 1.47E-04 |
| GO_ENDOSOME_TO_LYSOSOME_TRANSPORT                                                                           | 2.398264 | 0 | 1.50E-04 |
| KEGG_GLYCOSYLPHOSPHATIDYLINOSITOL_GPI_ANCHOR_BIOSYNTHESIS                                                   | 2.380926 | 0 | 1.53E-04 |
| GO_DNA_TEMPLATED_TRANSCRIPTION_TERMINATION                                                                  | 2.382359 | 0 | 1.56E-04 |
| GO_POSITIVE_REGULATION_OF_TELOMERE_MAINTENANCE_VIA_TELOMERE_LENGTHENING                                     | 2.385475 | 0 | 1.59E-04 |
| GO_REGULATION_OF_CENTROSOME_CYCLE                                                                           | 2.387777 | 0 | 1.62E-04 |
| GO_PROTEIN_UBIQUITINATION_INVOLVED_IN_UBIQUITIN_DEPENDENT_PROTEIN_CATABOLIC_PROCESS                         | 2.388362 | 0 | 1.65E-04 |
| GO_TRNA_TRANSPORT                                                                                           | 2.377111 | 0 | 1.66E-04 |
| GO_GDP_BINDING                                                                                              | 2.377303 | 0 | 1.69E-04 |
| GO_DNA_TEMPLATED_TRANSCRIPTION_ELONGATION                                                                   | 2.363932 | 0 | 1.78E-04 |
| GO_REGULATION_OF_TELOMERE_MAINTENANCE                                                                       | 2.365428 | 0 | 1.81E-04 |
| GO_EXONUCLEASE_ACTIVITY_ACTIVE_WITH_EITHER_RIBO_OR_DEOXYRIBONUCLEIC_ACIDS_AND_PRODUCING_5_PHOSPHOMONOESTERS | 2.355031 | 0 | 1.89E-04 |
| GO_UBIQUITIN_LIKE_PROTEIN_LIGASE_ACTIVITY                                                                   | 2.35571  | 0 | 1.92E-04 |
| GO_TRNA_METABOLIC_PROCESS                                                                                   | 2.346905 | 0 | 2.37E-04 |
| GO_NUCLEOTIDE_EXCISION_REPAIR                                                                               | 2.344503 | 0 | 2.46E-04 |
| GO_BASAL_TRANSCRIPTION_MACHINERY_BINDING                                                                    | 2.335392 | 0 | 2.46E-04 |
| GO_MULTI_ORGANISM_TRANSPORT                                                                                 | 2.337337 | 0 | 2.50E-04 |
| GO_UBIQUITIN_LIKE_PROTEIN_BINDING                                                                           | 2.344837 | 0 | 2.50E-04 |
| GO_EXORIBONUCLEASE_ACTIVITY                                                                                 | 2.337556 | 0 | 2.54E-04 |
| GO_ENDOSOME_ORGANIZATION                                                                                    | 2.334043 | 0 | 2.58E-04 |
| GO_THREONINE_TYPE_PEPTIDASE_ACTIVITY                                                                        | 2.341607 | 0 | 2.58E-04 |
| GO_REGULATION_OF_ORGANELLE_ASSEMBLY                                                                         | 2.317524 | 0 | 2.94E-04 |
| GO_ANTIGEN_PROCESSING_AND_PRESENTATION_OF_EXOGENOUS_PEPTIDE_ANTIGEN_VIA_MHC_CLASS_I                         | 2.318711 | 0 | 2.99E-04 |
| GO_NCRNA_PROCESSING                                                                                         | 2.290173 | 0 | 4.38E-04 |
| GO_TRANSCRIPTION_FROM_RNA_POLYMERASE_III_PROMOTER                                                           | 2.295359 | 0 | 4.44E-04 |
| GO_LIGASE_ACTIVITY_FORMING_CARBON_NITROGEN_BONDS                                                            | 2.295846 | 0 | 4.50E-04 |
| GO_MULTI_ORGANISM_LOCALIZATION                                                                              | 2.281286 | 0 | 4.73E-04 |
| KEGG_SPLICEOSOME                                                                                            | 2.279663 | 0 | 4.81E-04 |
| GO_POSITIVE_REGULATION_OF_TELOMERE_MAINTENANCE                                                              | 2.266856 | 0 | 5.29E-04 |
| GO_NLS_BEARING_PROTEIN_IMPORT_INTO_NUCLEUS                                                                  | 2.269684 | 0 | 5.30E-04 |
| GO_CYSTEINE_TYPE_ENDOPEPTIDASE_ACTIVITY                                                                     | 2.264687 | 0 | 5.35E-04 |
| GO_REGULATION_OF_PROTEIN_UBIQUITINATION_INVOLVED_IN_UBIQUITIN_DEPENDENT_PROTEIN_CATABOLIC_PROCESS           | 2.267378 | 0 | 5.36E-04 |

|                                                                                        |          |   |             |
|----------------------------------------------------------------------------------------|----------|---|-------------|
| GO_NUCLEOTIDE_EXCISION_REPAIR_PREINCISION_COMPLEX_ASSEMBLY                             | 2.260556 | 0 | 5.60E-04    |
| GO_PROTEIN_LOCALIZATION_TO_CILIUM                                                      | 2.259839 | 0 | 5.66E-04    |
| GO_POSITIVE_REGULATION_OF_PROTEIN_MODIFICATION_BY_SMALL_PROTEIN_CONJUGATION_OR_REMOVAL | 2.261093 | 0 | 5.67E-04    |
| GO_RNA_POLYMERASE_II_CORE_BINDING                                                      | 2.256832 | 0 | 5.71E-04    |
| GO_GPI_ANCHOR_METABOLIC_PROCESS                                                        | 2.25532  | 0 | 6.13E-04    |
| GO_TRANSCRIPTION_ELONGATION_FROM_RNA_POLYMERASE_II_PROMOTER                            | 2.250078 | 0 | 6.79E-04    |
| GO_SNRNA_METABOLIC_PROCESS                                                             | 2.236979 | 0 | 7.49E-04    |
| GO_SIGNAL_SEQUENCE_BINDING                                                             | 2.242365 | 0 | 7.55E-04    |
| GO_MRNA_CLEAVAGE                                                                       | 2.237301 | 0 | 7.58E-04    |
| KEGG_RNA_POLYMERASE                                                                    | 2.234414 | 0 | 7.86E-04    |
| GO_CYTOPLASMIC_MICROTUBULE_ORGANIZATION                                                | 2.229667 | 0 | 8.14E-04    |
| GO_POST_GOLGI_VESICLE_MEDIATED_TRANSPORT                                               | 2.231024 | 0 | 8.23E-04    |
| GO_TRANSLATION_INITIATION_FACTOR_ACTIVITY                                              | 2.228601 | 0 | 8.27E-04    |
| GO_NUCLEAR_PORE_ORGANIZATION                                                           | 2.226989 | 0 | 8.40E-04    |
| GO_PROTEIN_LOCALIZATION_TO_CYTOSKELETON                                                | 2.222961 | 0 | 8.56E-04    |
| GO_NUCLEAR_TRANSPORT                                                                   | 2.223043 | 0 | 8.65E-04    |
| GO_NUCLEAR_ENVELOPE_ORGANIZATION                                                       | 2.221268 | 0 | 8.70E-04    |
| GO_POSTTRANSCRIPTIONAL_REGULATION_OF_GENE_EXPRESSION                                   | 2.221387 | 0 | 8.79E-04    |
| GO_RNA_PHOSPHODIESTER_BOND_HYDROLYSIS                                                  | 2.217704 | 0 | 8.95E-04    |
| BIOCARTA_CDC42RAC_PATHWAY                                                              | 2.218631 | 0 | 9.04E-04    |
| GO_CELL_DIVISION                                                                       | 2.204946 | 0 | 0.001019179 |
| GO_UBIQUITIN_LIKE_PROTEIN_TRANSFERASE_ACTIVITY                                         | 2.205904 | 0 | 0.001029171 |
| GO_NUCLEUS_ORGANIZATION                                                                | 2.2075   | 0 | 0.001029528 |
| GO_PROTEIN_SUMOYLATION                                                                 | 2.207819 | 0 | 0.001039824 |
| GO_REGULATION_OF_RNA_STABILITY                                                         | 2.197219 | 0 | 0.001049283 |
| GO_PROTEIN_LOCALIZATION_TO_CENTROSOME                                                  | 2.197891 | 0 | 0.001049538 |
| GO_NUCLEAR_IMPORT                                                                      | 2.198851 | 0 | 0.00105963  |
| GO_NUCLEOBASE_CONTAINING_COMPOUND_TRANSPORT                                            | 2.193433 | 0 | 0.001126637 |
| GO_HELICASE_ACTIVITY                                                                   | 2.191109 | 0 | 0.001153903 |
| GO_PREASSEMBLY_OF_GPI_ANCHOR_IN_ER_MEMBRANE                                            | 2.187791 | 0 | 0.001177725 |
| GO_REGULATION_OF_TELOMERE_MAINTENANCE_VIA_TELOMERE_LENGTHENING                         | 2.18833  | 0 | 0.001179095 |
| GO_CELL_CYCLE_G2_M_PHASE_TRANSITION                                                    | 2.188855 | 0 | 0.001180898 |
| GO_NUCLEOTIDE_EXCISION_REPAIR_DNA_DAMAGE_RECOGNITION                                   | 2.186847 | 0 | 0.001185944 |
| GO_ESTABLISHMENT_OF_LOCALIZATION_BY_MOVEMENT_ALONG_MICROTUBULE                         | 2.181576 | 0 | 0.001239547 |
| GO_GOLGI_ORGANIZATION                                                                  | 2.180332 | 0 | 0.001273626 |
| GO_POSTREPLICATION_REPAIR                                                              | 2.177047 | 0 | 0.00129328  |
| GO_RNA_CATABOLIC_PROCESS                                                               | 2.177525 | 0 | 0.001304429 |
| GO_MITOTIC_NUCLEAR_DIVISION                                                            | 2.175021 | 0 | 0.001305978 |
| GO_RIBOSOME_BIOGENESIS                                                                 | 2.175927 | 0 | 0.001308303 |
| GO_REGULATION_OF_PROTEIN_MODIFICATION_BY_SMALL_PROTEIN_CONJUGATION_OR_REMOVAL          | 2.178183 | 0 | 0.001315772 |
| GO_POSITIVE_REGULATION_OF_CELLULAR_PROTEIN_CATABOLIC_PROCESS                           | 2.170853 | 0 | 0.00138583  |
| GO_NEGATIVE_REGULATION_OF_PROTEIN_MODIFICATION_BY_SMALL_PROTEIN_CONJUGATION_OR_REMOVAL | 2.171102 | 0 | 0.001388834 |

|                                                                                        |          |             |             |
|----------------------------------------------------------------------------------------|----------|-------------|-------------|
| GO_RNA_CAPPING                                                                         | 2.163833 | 0           | 0.001456097 |
| GO_RNA_POLYMERASE_III_ACTIVITY                                                         | 2.165172 | 0           | 0.001459477 |
| GO_RNA_POLYMERASE_CORE_ENZYME_BINDING                                                  | 2.16162  | 0.002386635 | 0.001469182 |
| GO_7_METHYLGUANOSINE_RNA_CAPPING                                                       | 2.15116  | 0           | 0.00166955  |
| GO_MITOCHONDRIAL_TRANSLATION                                                           | 2.14965  | 0           | 0.001672959 |
| GO_GLOBAL_GENOME_NUCLEOTIDE_EXCISION_REPAIR                                            | 2.148993 | 0           | 0.001675753 |
| GO_MRNA_BINDING                                                                        | 2.148547 | 0           | 0.001678999 |
| GO_FC_EPSILON_RECEPTOR_SIGNALING_PATHWAY                                               | 2.142    | 0           | 0.001804355 |
| GO_EXONUCLEASE_ACTIVITY                                                                | 2.143254 | 0           | 0.001808559 |
| KEGG_BASAL_TRANSCRIPTION_FACTORS                                                       | 2.142124 | 0           | 0.001818235 |
| GO_CELLULAR_PROTEIN_COMPLEX_ASSEMBLY                                                   | 2.139734 | 0           | 0.001821847 |
| GO_REGULATION_OF_CHROMOSOME_SEGREGATION                                                | 2.138502 | 0           | 0.001823887 |
| GO_PEPTIDYL_LYSINE_MODIFICATION                                                        | 2.135335 | 0           | 0.001872082 |
| GO_RRNA_METABOLIC_PROCESS                                                              | 2.133801 | 0           | 0.001881295 |
| GO_REGULATION_OF_CELLULAR_PROTEIN_CATABOLIC_PROCESS                                    | 2.129684 | 0           | 0.001935054 |
| GO_REGULATION_OF_TRANSLATIONAL_INITIATION                                              | 2.126419 | 0           | 0.001966588 |
| GO_PROTEIN_EXPORT_FROM_NUCLEUS                                                         | 2.120131 | 0           | 0.002177942 |
| GO_OXIDOREDUCTASE_ACTIVITY_ACTING_ON_THE_CH_CH_GROUP_OF_DONORS_NAD_OR_NADP_AS_ACCEPTOR | 2.118121 | 0           | 0.002192004 |
| GO_MULTI_ORGANISM_MEMBRANE_BUDDING                                                     | 2.111513 | 0           | 0.002366943 |
| GO_ACTIN_NUCLEATION                                                                    | 2.109234 | 0           | 0.002423629 |
| GO_INNATE_IMMUNE_RESPONSE_ACTIVATING_CELL_SURFACE_RECEPTOR_SIGNALING_PATHWAY           | 2.104032 | 0           | 0.00257233  |
| GO_REGULATION_OF_SPINDLE_ORGANIZATION                                                  | 2.100814 | 0           | 0.002655916 |
| GO_NUCLEAR_TRANSCRIBED_MRNA_CATABOLIC_PROCESS_EXONUCLEOLYTIC                           | 2.097056 | 0.002421308 | 0.002754136 |
| GO_REGULATION_OF_SISTER_CHROMATID_COHESION                                             | 2.097572 | 0           | 0.002766242 |
| GO_DNA_GEOMETRIC_CHANGE                                                                | 2.094713 | 0           | 0.002798952 |
| GO_MULTI_ORGANISM_ORGANELLE_ORGANIZATION                                               | 2.093369 | 0.002288329 | 0.002822134 |
| GO_REGULATION_OF_TELOMERASE_RNA_LOCALIZATION_TO_CAJAL_BODY                             | 2.090587 | 0           | 0.002914545 |
| GO_NUCLEOTIDYLTRANSFERASE_ACTIVITY                                                     | 2.089346 | 0           | 0.002915729 |
| GO_RAN_GTPASE_BINDING                                                                  | 2.083351 | 0           | 0.003087527 |
| GO_DAMAGED_DNA_BINDING                                                                 | 2.080593 | 0           | 0.003149295 |
| GO_CELL_SEPARATION_AFTER_CYTOKINESIS                                                   | 2.079632 | 0           | 0.003162176 |
| GO_RNA_POLYADENYLATION                                                                 | 2.076454 | 0           | 0.003243079 |
| GO_ESTABLISHMENT_OF_PROTEIN_LOCALIZATION_TO_ORGANELLE                                  | 2.073881 | 0           | 0.003382922 |
| GO_POSITIVE_REGULATION_OF_TELOMERASE_RNA_LOCALIZATION_TO_CAJAL_BODY                    | 2.063795 | 0           | 0.003751751 |
| GO_VACUOLAR_TRANSPORT                                                                  | 2.053152 | 0           | 0.004077421 |
| GO_NUCLEOTIDE_EXCISION_REPAIR_DNA_DUPLEX_UNWINDING                                     | 2.051477 | 0           | 0.004116688 |
| GO_FC_RECEPTOR_SIGNALING_PATHWAY                                                       | 2.044436 | 0           | 0.004388112 |
| KEGG_NUCLEOTIDE_EXCISION_REPAIR                                                        | 2.043304 | 0           | 0.004397876 |
| GO_INTRA_GOLGI_VESICLE_MEDIATED_TRANSPORT                                              | 2.041553 | 0           | 0.004399377 |
| GO_REGULATION_OF_TELOMERE_CAPPING                                                      | 2.044603 | 0           | 0.004409445 |
| GO_NUCLEAR_LOCALIZATION_SEQUENCE_BINDING                                               | 2.041829 | 0           | 0.004413869 |
| GO_TRNA_AMINOACYLATION                                                                 | 2.042616 | 0           | 0.004415465 |

|                                                                             |          |             |             |
|-----------------------------------------------------------------------------|----------|-------------|-------------|
| GO_UBIQUITIN_LIKE_PROTEIN_LIGASE_BINDING                                    | 2.040527 | 0           | 0.00441661  |
| GO_AEROBIC_RESPIRATION                                                      | 2.043506 | 0           | 0.004418832 |
| GO_REGULATION_OF_EXOSOMAL_SECRETION                                         | 2.038348 | 0.002192983 | 0.004450532 |
| GO_ATPASE_ACTIVITY                                                          | 2.039052 | 0           | 0.004458885 |
| GO_NUCLEAR_TRANSCRIBED_MRNA_CATABOLIC_PROCESS_DEADENYLATION_DEPENDENT_DECAY | 2.038142 | 0           | 0.00446079  |
| GO_POSITIVE_REGULATION_OF_CHROMOSOME_ORGANIZATION                           | 2.035747 | 0           | 0.004562443 |
| GO_PROTEIN_TARGETING                                                        | 2.030701 | 0           | 0.004681019 |
| GO_SISTER_CHROMATID_SEGREGATION                                             | 2.02643  | 0           | 0.004802016 |
| GO_GLUTATHIONE_DERIVATIVE_BIOSYNTHETIC_PROCESS                              | 2.025566 | 0           | 0.004804031 |
| GO_SPLICEOSOMAL_SNRNP_ASSEMBLY                                              | 2.027133 | 0           | 0.004811891 |
| GO_PROTEIN_LOCALIZATION_TO_NUCLEUS                                          | 2.027428 | 0           | 0.004822127 |
| GO_LYSOSOMAL_TRANSPORT                                                      | 2.024744 | 0           | 0.004835687 |
| GO_GLUTATHIONE_DERIVATIVE_METABOLIC_PROCESS                                 | 2.018585 | 0           | 0.005130293 |
| GO_REGULATION_OF_MRNA_METABOLIC_PROCESS                                     | 2.015402 | 0           | 0.005256963 |
| GO_VITAMIN_D_RECEPTOR_BINDING                                               | 2.013185 | 0.002352941 | 0.005324259 |
| GO_MRNA_3_END_PROCESSING                                                    | 2.013781 | 0           | 0.005325303 |
| GO_CHROMOSOME_SEGREGATION                                                   | 2.010806 | 0           | 0.005425776 |
| GO_POSITIVE_REGULATION_OF_DNA_REPAIR                                        | 2.010808 | 0           | 0.005450068 |
| GO_PORE_COMPLEX_ASSEMBLY                                                    | 2.005998 | 0.002309469 | 0.005585594 |
| GO_TBP_CLASS_PROTEIN_BINDING                                                | 2.00524  | 0.002304148 | 0.005594318 |
| GO_CYTOSKELETON_DEPENDENT_CYTOKINESIS                                       | 2.004525 | 0           | 0.005603486 |
| GO_MODULATION_BY_VIRUS_OF_HOST_MORPHOLOGY_OR_PHYSIOLOGY                     | 2.006047 | 0.00257732  | 0.005616284 |
| GO_TRNA_METHYLATION                                                         | 2.000622 | 0.002427185 | 0.005811726 |
| GO_REGULATION_OF_CELLULAR_AMIDE_METABOLIC_PROCESS                           | 1.998937 | 0           | 0.00586873  |
| GO_VIRAL_BUDDING                                                            | 1.991583 | 0.002364066 | 0.005977449 |
| GO_CYTOSKELETON_DEPENDENT_INTRACELLULAR_TRANSPORT                           | 1.996337 | 0           | 0.005979083 |
| GO_SPLICEOSOMAL_COMPLEX_ASSEMBLY                                            | 1.991708 | 0           | 0.006008103 |
| GO_REGULATION_OF_CILIUM_ASSEMBLY                                            | 1.994417 | 0           | 0.006025642 |
| GO_REGULATION_OF_SISTER_CHROMATID_SEGREGATION                               | 1.993845 | 0           | 0.006031918 |
| GO_AMINO_ACID_ACTIVATION                                                    | 1.992045 | 0           | 0.006039072 |
| KEGG_PEROXISOME                                                             | 1.995065 | 0           | 0.006040672 |
| GO_REGULATION_OF_INTRACELLULAR_ESTROGEN_RECEPTOR_SIGNALING_PATHWAY          | 1.994496 | 0           | 0.006052177 |
| GO_RNA_SECONDARY_STRUCTURE_UNWINDING                                        | 1.989683 | 0           | 0.006062082 |
| GO_TRANSLATIONAL_TERMINATION                                                | 1.992108 | 0           | 0.006070362 |
| GO_MICROTUBULE_MOTOR_ACTIVITY                                               | 1.984118 | 0           | 0.006320398 |
| GO_MITOCHONDRIAL_TRANSPORT                                                  | 1.985134 | 0           | 0.006342388 |
| GO_VACUOLE_ORGANIZATION                                                     | 1.984283 | 0           | 0.006347037 |
| GO_REGULATION_OF_CELLULAR_AMINO_ACID_METABOLIC_PROCESS                      | 1.981582 | 0           | 0.006417877 |
| GO_PROTEIN_IMPORT                                                           | 1.97818  | 0           | 0.006531867 |
| GO_3_5_EXONUCLEASE_ACTIVITY                                                 | 1.978205 | 0.002450981 | 0.006564203 |
| GO_POSITIVE_REGULATION_OF_HISTONE_H3_K4_METHYLATION                         | 1.974726 | 0.00234192  | 0.006742995 |
| GO_REGULATION_OF_MICROTUBULE_BASED_PROCESS                                  | 1.971852 | 0           | 0.006881181 |

|                                                                                      |          |             |             |
|--------------------------------------------------------------------------------------|----------|-------------|-------------|
| GO_DOUBLE_STRAND_BREAK_REPAIR                                                        | 1.970927 | 0           | 0.006922801 |
| GO_REGULATION_OF_RESPONSE_TO_DNA_DAMAGE_STIMULUS                                     | 1.970017 | 0           | 0.00693973  |
| GO_ATPASE_ACTIVITY_COUPLED                                                           | 1.969025 | 0           | 0.006965593 |
| GO_OXIDOREDUCTASE_ACTIVITY_ACTING_ON_NAD_P_H_QUINONE_OR_SIMILAR_COMPOUND_AS_ACCEPTOR | 1.967072 | 0           | 0.007074927 |
| GO_TRANSCRIPTION_FROM_RNA_POLYMERASE_I_PROMOTER                                      | 1.963294 | 0           | 0.00732527  |
| GO_NUCLEAR_ENVELOPE_DISASSEMBLY                                                      | 1.958186 | 0           | 0.007647388 |
| GO_LIGASE_ACTIVITY_FORMING_CARBON_OXYGEN_BONDS                                       | 1.949941 | 0.002512563 | 0.008265242 |
| GO_PROTEIN_K48_LINKED_UBIQUITINATION                                                 | 1.942777 | 0           | 0.008885002 |
| GO_MEMBRANE_DISASSEMBLY                                                              | 1.940524 | 0           | 0.009063603 |
| GO_NUCLEOTIDE_EXCISION_REPAIR_DNA_INCISION_3_TO_LESION                               | 1.93743  | 0           | 0.009313379 |
| GO_ESTABLISHMENT_OF_PROTEIN_LOCALIZATION_TO_VACUOLE                                  | 1.935876 | 0           | 0.009413272 |
| GO_MRNA_3_UTR_BINDING                                                                | 1.935042 | 0           | 0.009416682 |
| GO_TRNA_PROCESSING                                                                   | 1.935435 | 0           | 0.009421908 |
| GO_TRNA_METHYLTRANSFERASE_ACTIVITY                                                   | 1.934207 | 0           | 0.009424865 |
| GO_PROTEIN_TRANSPORTER_ACTIVITY                                                      | 1.934512 | 0           | 0.00944424  |
