# Supplementary material
Source: HighWire-hosted journal article supplement (https://erj.ersjournals.com/content/52/3/1701556)
Supplement: inline-supplementary-material-4 [file inline-supplementary-material-4.pdf]

| genename     | r-value     | FDR        | t-value     | CMH-associated |
|--------------|-------------|------------|-------------|----------------|
| LOC100129532 | -0.55730859 | 0.01053406 | -4.97782008 |                |
| RAMP2        | -0.55957834 | 0.01053406 | -5.00730808 |                |
| OR4X2        | -0.57050914 | 0.01053406 | -5.15165478 |                |
| TRIM50       | -0.54700285 | 0.01053406 | -4.84593565 |                |
| MGAT5B       | -0.54617245 | 0.01053406 | -4.83544820 |                |
| ADRA2B       | -0.57634177 | 0.01053406 | -5.23032197 |                |
| UPP2         | -0.57683747 | 0.01053406 | -5.23706223 |                |
| DGKG         | -0.54600807 | 0.01053406 | -4.83337469 | yes            |
| CCDC83       | -0.56177111 | 0.01053406 | -5.03595160 |                |
| CSTF2T       | 0.59012985  | 0.01053406 | 5.42112576  |                |
| HLX          | -0.57354367 | 0.01053406 | -5.19243603 |                |
| MGC44328     | -0.54845470 | 0.01053406 | -4.86432061 |                |
| REEP2        | -0.56670666 | 0.01053406 | -5.10099399 |                |
| LMOD3        | -0.55144647 | 0.01053406 | -4.90240478 |                |
| PTMS         | -0.56487977 | 0.01053406 | -5.07682560 | yes            |
| HIF3A        | -0.57231959 | 0.01053406 | -5.17594752 |                |
| SNRPD1       | 0.55386025  | 0.01053406 | 4.93332922  |                |
| GFI1B        | -0.54716502 | 0.01053406 | -4.84798616 |                |
| TKTL2        | -0.54750675 | 0.01053406 | -4.85230945 |                |
| USP42        | 0.55271977  | 0.01053406 | 4.91869566  | yes            |
| CACNA1H      | -0.55518355 | 0.01053406 | -4.95035886 |                |
| CTSB         | 0.54182685  | 0.01108551 | 4.78089551  |                |
| GRB14        | -0.54242408 | 0.01108551 | -4.78836039 |                |
| hCG_1793639  | -0.54195407 | 0.01108551 | -4.78248480 |                |
| SSX10        | -0.52936619 | 0.01149683 | -4.62743411 |                |
| LOC100129427 | -0.53444805 | 0.01149683 | -4.68950144 |                |
| GDF11        | -0.52781090 | 0.01149683 | -4.60857779 | yes            |
| SLMO1        | -0.53732751 | 0.01149683 | -4.72498443 |                |
| KLK8         | -0.52836610 | 0.01149683 | -4.61530159 |                |
| KTI12        | 0.53416833  | 0.01149683 | 4.68606668  |                |
| CXorf39      | 0.52787532  | 0.01149683 | 4.60935755  | yes            |
| FAM163A      | -0.53941668 | 0.01149683 | -4.75087413 |                |
| LOC150763    | -0.53719861 | 0.01149683 | -4.72339109 |                |
| ADAT1        | 0.52736824  | 0.01149683 | 4.60322266  | yes            |
| HNRNPF       | 0.52889746  | 0.01149683 | 4.62174444  | yes            |
| MAP3K15      | -0.53264777 | 0.01149683 | -4.66743333 |                |
| TESC         | -0.52932845 | 0.01149683 | -4.62697578 | yes            |
| LIMS2        | -0.53461219 | 0.01149683 | -4.69151794 | yes            |
| C3orf14      | 0.53425990  | 0.01149683 | 4.68719094  |                |
| RPL34        | 0.53129383  | 0.01149683 | 4.65089473  |                |
| SAT1         | 0.52793815  | 0.01149683 | 4.61011815  | yes            |
| WIPF3        | -0.52974660 | 0.01149683 | -4.63205596 |                |
| FAM117A      | -0.52754791 | 0.01149683 | -4.60539565 |                |
| CDKN1C       | -0.52581535 | 0.01150902 | -4.58447780 |                |
| COX7A1       | -0.52654602 | 0.01150902 | -4.59328973 |                |
| TULP2        | -0.52572824 | 0.01150902 | -4.58342811 |                |
| AHSG         | -0.52488509 | 0.01166631 | -4.57327895 |                |
| PAH          | -0.52434802 | 0.01168082 | -4.56682387 |                |
| LOC100130518 | -0.52234108 | 0.01181619 | -4.54276838 | yes            |

|               |             |            |             |     |
|---------------|-------------|------------|-------------|-----|
| FOXC2         | -0.52002104 | 0.01181619 | -4.51508948 |     |
| GPBR          | -0.51989624 | 0.01181619 | -4.51360447 |     |
| EVX2          | -0.52143894 | 0.01181619 | -4.53198916 | yes |
| SULT1C3       | -0.52163522 | 0.01181619 | -4.53433269 |     |
| ZNF295        | 0.52092440  | 0.01181619 | 4.52585054  |     |
| PLEKHB2       | 0.52015242  | 0.01181619 | 4.51665315  |     |
| FN3K          | -0.52261027 | 0.01181619 | -4.54598886 |     |
| ZNF414        | -0.52035999 | 0.01181619 | -4.51912469 |     |
| SNORD116-4    | -0.51358195 | 0.01193953 | -4.43898093 |     |
| SNORD116-8    | -0.51678632 | 0.01193953 | -4.47672629 |     |
| SNORD115-25   | -0.51325500 | 0.01193953 | -4.43514404 |     |
| TMEM170A      | 0.51522201  | 0.01193953 | 4.45826801  |     |
| CNTNAP5       | -0.51748416 | 0.01193953 | -4.48498022 |     |
| ZBTB46        | -0.51463294 | 0.01193953 | -4.45133297 |     |
| DNMT3B        | -0.51515518 | 0.01193953 | -4.45748082 |     |
| OR5D14        | -0.51906085 | 0.01193953 | -4.50367418 |     |
| C11orf35      | -0.51774044 | 0.01193953 | -4.48801460 |     |
| C10orf53      | -0.51609295 | 0.01193953 | -4.46853722 |     |
| NBPF22P       | -0.51319106 | 0.01193953 | -4.43439394 |     |
| PARVB         | -0.51557301 | 0.01193953 | -4.46240433 | yes |
| EMR4P         | -0.51605802 | 0.01193953 | -4.46812500 |     |
| UFSP1         | -0.51602285 | 0.01193953 | -4.46770999 |     |
| C20orf199     | 0.51414608  | 0.01193953 | 4.44560767  |     |
| SOX18         | -0.51355196 | 0.01193953 | -4.43862894 |     |
| ADPGK         | 0.51758000  | 0.01193953 | 4.48611477  |     |
| HSBP1         | 0.51092737  | 0.01239826 | 4.40790315  | yes |
| KRAS          | 0.51176697  | 0.01239826 | 4.41771399  | yes |
| FLJ42418      | -0.51138710 | 0.01239826 | -4.41327303 |     |
| CA11          | -0.51097342 | 0.01239826 | -4.40844071 |     |
| ACHE          | -0.51041325 | 0.01249399 | -4.40190397 | yes |
| LRRC3B        | -0.50907943 | 0.01270035 | -4.38636968 |     |
| OR52E4        | -0.50905913 | 0.01270035 | -4.38613354 |     |
| WNT3          | -0.50913005 | 0.01270035 | -4.38695845 |     |
| THUMPD3       | 0.50849066  | 0.01283228 | 4.37952618  |     |
| LOC100130174  | -0.50771344 | 0.01307401 | -4.37050493 |     |
| FOXC1         | -0.50658612 | 0.01350554 | -4.35744552 |     |
| CYP46A1       | -0.50573861 | 0.01364060 | -4.34764742 |     |
| RBPM52        | -0.50593013 | 0.01364060 | -4.34986017 |     |
| LOC728115     | 0.50505900  | 0.01369305 | 4.33980260  |     |
| MOGAT2        | -0.50517013 | 0.01369305 | -4.34108471 |     |
| SNORD116-6    | -0.50343430 | 0.01381164 | -4.32109244 |     |
| RP11-218C14.6 | -0.50362256 | 0.01381164 | -4.32325734 |     |
| APOBEC1       | -0.50441945 | 0.01381164 | -4.33243019 |     |
| PURB          | 0.50365226  | 0.01381164 | 4.32359892  |     |
| LOC728844     | 0.50394239  | 0.01381164 | 4.32693707  |     |
| TCEAL2        | -0.50129272 | 0.01405519 | -4.29652358 |     |
| TTC7B         | -0.50113789 | 0.01405519 | -4.29475141 |     |
| HOXB1         | -0.50112740 | 0.01405519 | -4.29463137 |     |
| NFYA          | 0.50130145  | 0.01405519 | 4.29662353  |     |
| LOC646508     | -0.50117368 | 0.01405519 | -4.29516097 |     |

|           |             |            |             |     |
|-----------|-------------|------------|-------------|-----|
| VHL       | 0.50182752  | 0.01405519 | 4.30264899  |     |
| CSDA      | 0.50165735  | 0.01405519 | 4.30069920  |     |
| C9orf96   | -0.49804727 | 0.01424733 | -4.25949131 |     |
| DRD2      | -0.49862986 | 0.01424733 | -4.26612138 |     |
| PLD5      | -0.49863561 | 0.01424733 | -4.26618686 |     |
| GLT25D2   | -0.49790982 | 0.01424733 | -4.25792826 |     |
| SUSD5     | -0.49830669 | 0.01424733 | -4.26244269 |     |
| C1orf167  | -0.49798209 | 0.01424733 | -4.25875009 |     |
| HPCAL1    | -0.49851023 | 0.01424733 | -4.26475935 |     |
| M6PR      | 0.49803004  | 0.01424733 | 4.25929539  |     |
| LOC441476 | -0.49868682 | 0.01424733 | -4.26677000 |     |
| SLC15A2   | 0.49812202  | 0.01424733 | 4.26034163  | yes |
| BST1      | -0.49784830 | 0.01424733 | -4.25722877 |     |
| PPFIA4    | -0.49979373 | 0.01424733 | -4.27938953 |     |
| SNUPN     | 0.48569720  | 0.01435878 | 4.12071277  |     |
| PAIP1     | -0.49224308 | 0.01435878 | -4.19385345 |     |
| ADCY1     | -0.48925202 | 0.01435878 | -4.16031813 | yes |
| CHST14    | -0.48521977 | 0.01435878 | -4.11541407 |     |
| ODF3      | -0.48814726 | 0.01435878 | -4.14798072 |     |
| C17orf95  | 0.48660658  | 0.01435878 | 4.13081882  |     |
| DMBX1     | -0.48561101 | 0.01435878 | -4.11975588 |     |
| C20orf166 | -0.48829888 | 0.01435878 | -4.14967243 |     |
| LRRC15    | -0.49181583 | 0.01435878 | -4.18905128 |     |
| BEST3     | -0.48520696 | 0.01435878 | -4.11527201 |     |
| UNC45B    | -0.49152694 | 0.01435878 | -4.18580646 | yes |
| DACT3     | -0.49333638 | 0.01435878 | -4.20616011 |     |
| GPBAR1    | -0.49049560 | 0.01435878 | -4.17423734 |     |
| ATP6V0E2  | -0.49298542 | 0.01435878 | -4.20220671 |     |
| CCDC63    | -0.48613675 | 0.01435878 | -4.12559532 |     |
| BMPER     | -0.48972294 | 0.01435878 | -4.16558518 |     |
| LCE4A     | -0.48607044 | 0.01435878 | -4.12485852 |     |
| HEPACAM   | -0.48813273 | 0.01435878 | -4.14781863 |     |
| GPR97     | -0.49404335 | 0.01435878 | -4.21413219 |     |
| FOXF1     | -0.49387075 | 0.01435878 | -4.21218487 |     |
| ZNF423    | -0.49529150 | 0.01435878 | -4.22823361 |     |
| AHCYL2    | 0.48946006  | 0.01435878 | 4.16264440  |     |
| DEFB119   | -0.49233341 | 0.01435878 | -4.19486929 |     |
| C16orf65  | -0.48853831 | 0.01435878 | -4.15234476 |     |
| TMEM158   | -0.48682177 | 0.01435878 | -4.13321281 |     |
| MYRIP     | -0.49102797 | 0.01435878 | -4.18020633 |     |
| OR2F1     | -0.49278610 | 0.01435878 | -4.19996266 |     |
| CNTN6     | -0.49561155 | 0.01435878 | -4.23185518 |     |
| BMP10     | -0.48776403 | 0.01435878 | -4.14370711 |     |
| GNAZ      | -0.49702906 | 0.01435878 | -4.24792230 |     |
| BLOC1S2   | 0.48650874  | 0.01435878 | 4.12973066  |     |
| SLC9A10   | -0.49034561 | 0.01435878 | -4.17255676 |     |
| KCNC3     | -0.49217704 | 0.01435878 | -4.19311089 |     |
| FAM148B   | -0.49293246 | 0.01435878 | -4.20161035 |     |
| SLC6A17   | -0.48800530 | 0.01435878 | -4.14639724 | yes |
| C2orf82   | -0.49123957 | 0.01435878 | -4.18258051 |     |

|              |             |            |             |     |
|--------------|-------------|------------|-------------|-----|
| OR52E8       | -0.48834017 | 0.01435878 | -4.15013316 |     |
| ACCSL        | -0.49305249 | 0.01435878 | -4.20296204 |     |
| OR5M1        | -0.49116668 | 0.01435878 | -4.18176261 |     |
| LDLRAD2      | -0.49510571 | 0.01435878 | -4.22613236 |     |
| FOXB2        | -0.48623988 | 0.01435878 | -4.12674153 |     |
| NUDT1        | -0.48713315 | 0.01435878 | -4.13667868 |     |
| NDUFA9       | 0.48545168  | 0.01435878 | 4.11798735  |     |
| SPRN         | -0.49054365 | 0.01435878 | -4.17477588 |     |
| SEPSECS      | 0.49627762  | 0.01435878 | 4.23939924  |     |
| NIP7         | 0.48834267  | 0.01435878 | 4.15016103  |     |
| GNG13        | -0.48541999 | 0.01435878 | -4.11763561 |     |
| C11orf71     | 0.49565063  | 0.01435878 | 4.23229752  |     |
| C9orf95      | 0.48883038  | 0.01435878 | 4.15560638  |     |
| MEG3         | -0.48552405 | 0.01435878 | -4.11879057 |     |
| CMAS         | 0.48721713  | 0.01435878 | 4.13761376  |     |
| PLEKHA4      | -0.48810239 | 0.01435878 | -4.14748019 |     |
| DEFB136      | -0.49291333 | 0.01435878 | -4.20139502 |     |
| PKNOX2       | -0.48891806 | 0.01435878 | -4.15658593 |     |
| ANO3         | -0.49137573 | 0.01435878 | -4.18410879 |     |
| ZFYVE20      | 0.48528592  | 0.01435878 | 4.11614798  |     |
| TFB2M        | 0.49694782  | 0.01435878 | 4.24700030  |     |
| SGCA         | -0.48532178 | 0.01435878 | -4.11654587 |     |
| SLC30A5      | 0.48749237  | 0.01435878 | 4.14067961  |     |
| RPL23AP64    | -0.49576281 | 0.01435878 | -4.23356752 | yes |
| KRTAP19-8    | -0.48763671 | 0.01435878 | -4.14228803 |     |
| LOC100133430 | -0.49327446 | 0.01435878 | -4.20546242 |     |
| TTY5         | -0.49589072 | 0.01435878 | -4.23501592 |     |
| TMEM128      | 0.49661673  | 0.01435878 | 4.24324398  |     |
| KIAA1755     | -0.49272339 | 0.01435878 | -4.19925687 |     |
| CBFB         | 0.48849482  | 0.01435878 | 4.15185933  | yes |
| AKAP4        | -0.48618637 | 0.01435878 | -4.12614682 |     |
| RTN1         | -0.48498883 | 0.01439424 | -4.11285280 |     |
| C1QTNF5      | -0.48437886 | 0.01440148 | -4.10609308 | yes |
| MTCH2        | 0.48442586  | 0.01440148 | 4.10661367  |     |
| PDX1         | -0.48478253 | 0.01440148 | -4.11056572 |     |
| USP38        | 0.48457221  | 0.01440148 | 4.10823497  | yes |
| PIP5KL1      | -0.48391692 | 0.01456828 | -4.10097899 |     |
| WIF1         | -0.48129117 | 0.01490984 | -4.07199469 |     |
| DUSP15       | -0.48282300 | 0.01490984 | -4.08888633 |     |
| AMAC1        | -0.48144844 | 0.01490984 | -4.07372663 |     |
| GLIPR2       | 0.48050812  | 0.01490984 | 4.06337866  | yes |
| TIGD2        | 0.48221472  | 0.01490984 | 4.08217290  |     |
| FCAR         | -0.48144406 | 0.01490984 | -4.07367841 |     |
| ITGA11       | -0.48123951 | 0.01490984 | -4.07142585 |     |
| CAMTA1       | -0.48180406 | 0.01490984 | -4.07764498 |     |
| ZSCAN1       | -0.48126433 | 0.01490984 | -4.07169916 |     |
| C1orf95      | -0.48188412 | 0.01490984 | -4.07852741 |     |
| INCA1        | -0.48234430 | 0.01490984 | -4.08360239 |     |
| RNASE13      | -0.48300778 | 0.01490984 | -4.09092725 |     |
| RBP3         | -0.48049419 | 0.01490984 | -4.06322557 |     |

|              |             |            |             |     |
|--------------|-------------|------------|-------------|-----|
| LOC646359    | -0.48091008 | 0.01490984 | -4.06779990 |     |
| FHOD3        | -0.48047257 | 0.01490984 | -4.06298780 |     |
| TCF7L1       | -0.48190386 | 0.01490984 | -4.07874500 |     |
| CASP4        | 0.48256260  | 0.01490984 | 4.08601142  |     |
| FIBCD1       | -0.48112811 | 0.01490984 | -4.07019951 |     |
| ZNF628       | -0.48067833 | 0.01490984 | -4.06525044 |     |
| DGKI         | -0.48212308 | 0.01490984 | -4.08116220 |     |
| PDE9A        | -0.48021696 | 0.01497564 | -4.06017825 | yes |
| EXOSC2       | 0.47955207  | 0.01512053 | 4.05287622  |     |
| HOXD4        | -0.47969316 | 0.01512053 | -4.05442501 | yes |
| RSPO4        | -0.47959417 | 0.01512053 | -4.05333833 |     |
| EFCAB3       | -0.47919252 | 0.01520529 | -4.04893135 |     |
| KLF15        | -0.47913421 | 0.01520529 | -4.04829186 |     |
| LOC100129654 | -0.47267682 | 0.01522297 | -3.97789666 |     |
| CDX1         | -0.47334951 | 0.01522297 | -3.98519093 | yes |
| STAG3        | -0.47264598 | 0.01522297 | -3.97756248 |     |
| WTIP         | -0.47754454 | 0.01522297 | -4.03088397 | yes |
| TRAM1L1      | -0.47317556 | 0.01522297 | -3.98330388 | yes |
| LSM11        | -0.47321601 | 0.01522297 | -3.98374261 | yes |
| PNCK         | -0.47457156 | 0.01522297 | -3.99846541 | yes |
| GATA5        | -0.47824153 | 0.01522297 | -4.03851018 |     |
| PARP4        | 0.47713211  | 0.01522297 | 4.02637602  |     |
| LOC146336    | -0.47221578 | 0.01522297 | -3.97290248 |     |
| ADRA1A       | -0.47406966 | 0.01522297 | -3.99300991 | yes |
| SMYD1        | -0.47475314 | 0.01522297 | -4.00044035 |     |
| ADRA2C       | -0.47492711 | 0.01522297 | -4.00233312 | yes |
| DPYS         | -0.47464511 | 0.01522297 | -3.99926520 |     |
| ATN1         | -0.47504606 | 0.01522297 | -4.00362760 |     |
| PDE12        | 0.47705516  | 0.01522297 | 4.02553537  |     |
| EFR3B        | -0.47504142 | 0.01522297 | -4.00357714 |     |
| FOXE3        | -0.47234192 | 0.01522297 | -3.97426845 |     |
| CLDN15       | -0.47222292 | 0.01522297 | -3.97297985 |     |
| C20orf200    | -0.47384325 | 0.01522297 | -3.99055055 |     |
| TPSG1        | -0.47515156 | 0.01522297 | -4.00477594 |     |
| C15orf60     | -0.47599453 | 0.01522297 | -4.01395988 | yes |
| GSDMA        | -0.47755810 | 0.01522297 | -4.03103228 |     |
| SLC25A42     | -0.47426001 | 0.01522297 | -3.99507836 | yes |
| SYPL2        | -0.47273841 | 0.01522297 | -3.97856408 |     |
| LOC285943    | -0.47835530 | 0.01522297 | -4.03975585 |     |
| C1QL4        | -0.47473207 | 0.01522297 | -4.00021114 |     |
| IGBP1        | 0.47864802  | 0.01522297 | 4.04296238  |     |
| PP13004      | -0.47396115 | 0.01522297 | -3.99183113 | yes |
| MN1          | -0.47549363 | 0.01522297 | -4.00850104 | yes |
| LOC441931    | -0.47723141 | 0.01522297 | -4.02746112 |     |
| ASTN1        | -0.47289648 | 0.01522297 | -3.98027750 |     |
| ATP1B2       | -0.47323528 | 0.01522297 | -3.98395171 |     |
| NKX6-1       | -0.47688900 | 0.01522297 | -4.02372044 |     |
| UTP18        | 0.47330659  | 0.01522297 | 3.98472527  |     |
| IGF2AS       | -0.47751262 | 0.01522297 | -4.03053502 |     |
| FTHL17       | -0.47417090 | 0.01522297 | -3.99410994 |     |

|             |             |            |             |     |
|-------------|-------------|------------|-------------|-----|
| POLR2H      | 0.47455515  | 0.01522297 | 3.99828688  | yes |
| PON2        | 0.47468615  | 0.01522297 | 3.99971163  |     |
| RHBDL2      | 0.47869138  | 0.01522297 | 4.04343747  |     |
| WDR33       | 0.47583311  | 0.01522297 | 4.01220015  | yes |
| RADIL       | -0.47342828 | 0.01522297 | -3.98604574 |     |
| PSMA4       | 0.47547858  | 0.01522297 | 4.00833702  |     |
| PSMB4       | 0.47641681  | 0.01522297 | 4.01856581  |     |
| ZSWIM6      | 0.47343524  | 0.01522297 | 3.98612125  |     |
| TRIB3       | -0.47671415 | 0.01522297 | -4.02181112 |     |
| ZNF410      | 0.47595317  | 0.01522297 | 4.01350893  | yes |
| SOX17       | -0.47336300 | 0.01522297 | -3.98533740 |     |
| SIM2        | -0.47238839 | 0.01522297 | -3.97477176 |     |
| SKP1        | 0.47724443  | 0.01522297 | 4.02760334  |     |
| LOC728318   | -0.47265607 | 0.01522297 | -3.97767178 |     |
| UBC         | 0.47884206  | 0.01522297 | 4.04508876  |     |
| OR4A5       | -0.47778666 | 0.01522297 | -4.03353208 |     |
| HIST1H4G    | -0.47534787 | 0.01522297 | -4.00691346 |     |
| NAPG        | 0.47687976  | 0.01522297 | 4.02361947  |     |
| GLYATL1     | -0.47731020 | 0.01522297 | -4.02832222 |     |
| PDLIM7      | -0.47725671 | 0.01522297 | -4.02773759 | yes |
| USP6NL      | 0.47259563  | 0.01522297 | 3.97701681  | yes |
| TBKBP1      | -0.47646105 | 0.01522297 | -4.01904852 |     |
| SNORD116-14 | -0.47021622 | 0.01531124 | -3.95129099 |     |
| SNORD116-24 | -0.47063568 | 0.01531124 | -3.95581809 |     |
| G3BP1       | 0.47087211  | 0.01531124 | 3.95837126  |     |
| SPEG        | -0.47038201 | 0.01531124 | -3.95307992 | yes |
| LOC29034    | -0.47158476 | 0.01531124 | -3.96607390 |     |
| GTF2E2      | 0.47074487  | 0.01531124 | 3.95699714  | yes |
| UCRC        | 0.47194314  | 0.01531124 | 3.96995108  |     |
| NRAS        | 0.47029216  | 0.01531124 | 3.95211034  |     |
| DYNC1LI1    | 0.47030108  | 0.01531124 | 3.95220655  |     |
| COPZ2       | -0.47163155 | 0.01531124 | -3.96657989 | yes |
| IRGC        | -0.47042558 | 0.01531124 | -3.95355017 |     |
| PAPOLB      | -0.47005067 | 0.01531124 | -3.94950529 |     |
| CDH23       | -0.47182749 | 0.01531124 | -3.96869968 | yes |
| SLC26A10    | -0.47081254 | 0.01531124 | -3.95772795 | yes |
| TLL2        | -0.47150253 | 0.01531124 | -3.96518464 |     |
| UMPS        | 0.47002630  | 0.01531124 | 3.94924244  |     |
| CA4         | -0.47100020 | 0.01531124 | -3.95975506 |     |
| ALX1        | -0.47035205 | 0.01531124 | -3.95275662 |     |
| WDR87       | -0.47107249 | 0.01531124 | -3.96053611 |     |
| UNC5A       | -0.47057733 | 0.01531124 | -3.95518809 |     |
| FAM132B     | -0.46992585 | 0.01531260 | -3.94815916 |     |
| MTX2        | 0.46946994  | 0.01532789 | 3.94324520  |     |
| BVES        | -0.46931621 | 0.01532789 | -3.94158913 |     |
| PRSS7       | -0.46955735 | 0.01532789 | -3.94418699 |     |
| MED10       | 0.46942736  | 0.01532789 | 3.94278644  |     |
| CCDC109A    | 0.46960111  | 0.01532789 | 3.94465857  | yes |
| KIAA0644    | -0.46939728 | 0.01532789 | -3.94246240 |     |
| CISH        | -0.46901092 | 0.01533791 | -3.93830179 |     |

|              |             |            |             |     |
|--------------|-------------|------------|-------------|-----|
| SETD1B       | -0.46909546 | 0.01533791 | -3.93921196 | yes |
| KIF5A        | -0.46913514 | 0.01533791 | -3.93963917 |     |
| GRID2        | -0.46864799 | 0.01543097 | -3.93439612 |     |
| ROPN1        | -0.46870426 | 0.01543097 | -3.93500155 |     |
| PMPCB        | 0.46842268  | 0.01550158 | 3.93197268  |     |
| SNORD116-2   | -0.46686029 | 0.01556945 | -3.91519496 |     |
| SNORD116-23  | -0.46686761 | 0.01556945 | -3.91527343 |     |
| LOC100127905 | -0.46273350 | 0.01556945 | -3.87110367 |     |
| LOC100133142 | -0.46524184 | 0.01556945 | -3.89786453 | yes |
| PDCD6        | 0.46376527  | 0.01556945 | 3.88209695  |     |
| C1QTNF4      | -0.46268402 | 0.01556945 | -3.87057692 |     |
| OR51F2       | -0.46644806 | 0.01556945 | -3.91077605 |     |
| OR10A7       | -0.46438422 | 0.01556945 | -3.88870145 |     |
| NIPA1        | 0.46564636  | 0.01556945 | 3.90219151  |     |
| UHMK1        | 0.46775555  | 0.01556945 | 3.92480300  |     |
| AP1S3        | 0.46507959  | 0.01556945 | 3.89612989  |     |
| NKX2-5       | -0.46273543 | 0.01556945 | -3.87112416 |     |
| C1orf127     | -0.46431044 | 0.01556945 | -3.88791378 |     |
| MMAA         | 0.46463605  | 0.01556945 | 3.89139065  |     |
| ZNF679       | -0.46405542 | 0.01556945 | -3.88519203 |     |
| SPERT        | -0.46449830 | 0.01556945 | -3.88991949 |     |
| FGF4         | -0.46565932 | 0.01556945 | -3.90233011 |     |
| GABRB3       | -0.46359252 | 0.01556945 | -3.88025497 |     |
| CLIP3        | -0.46807705 | 0.01556945 | -3.92825712 |     |
| GALNT8       | -0.46725252 | 0.01556945 | -3.91940244 |     |
| PCOLCE2      | -0.46359135 | 0.01556945 | -3.88024247 |     |
| FOXB1        | -0.46297793 | 0.01556945 | -3.87370624 |     |
| B3GAT1       | -0.46447717 | 0.01556945 | -3.88969385 |     |
| AQP11        | -0.46546732 | 0.01556945 | -3.90027599 |     |
| PIGW         | 0.46629452  | 0.01556945 | 3.90913100  |     |
| GPR150       | -0.46743254 | 0.01556945 | -3.92133464 |     |
| GUCY1A2      | -0.46796620 | 0.01556945 | -3.92706594 |     |
| H3F3B        | 0.46334061  | 0.01556945 | 3.87756987  |     |
| HOXB3        | -0.46508266 | 0.01556945 | -3.89616279 |     |
| HOXB6        | -0.46550980 | 0.01556945 | -3.90073045 | yes |
| IGFL3        | -0.46656202 | 0.01556945 | -3.91199726 |     |
| LOC388906    | -0.46338011 | 0.01556945 | -3.87799083 |     |
| C15orf58     | 0.46362333  | 0.01556945 | 3.88058343  |     |
| LYL1         | -0.46664959 | 0.01556945 | -3.91293589 |     |
| MSI1         | -0.46452153 | 0.01556945 | -3.89016752 |     |
| MYL1         | -0.46338502 | 0.01556945 | -3.87804316 |     |
| OTC          | -0.46552817 | 0.01556945 | -3.90092692 |     |
| FOXP3        | -0.46291618 | 0.01556945 | -3.87304859 |     |
| CALHM2       | -0.46282575 | 0.01556945 | -3.87208581 |     |
| DERA         | 0.46672426  | 0.01556945 | 3.91373641  |     |
| UBAP1        | 0.46412152  | 0.01556945 | 3.88589736  |     |
| ANAPC5       | 0.46297579  | 0.01556945 | 3.87368339  |     |
| POLR3K       | 0.46473683  | 0.01556945 | 3.89246710  |     |
| C9orf11      | -0.46737786 | 0.01556945 | -3.92074765 |     |
| CRLS1        | 0.46788211  | 0.01556945 | 3.92616245  |     |



|              |             |            |             |     |
|--------------|-------------|------------|-------------|-----|
| EXD3         | -0.46427081 | 0.01556945 | -3.88749072 | yes |
| PIGV         | 0.46415002  | 0.01556945 | 3.88620152  |     |
| NIT2         | 0.46290721  | 0.01556945 | 3.87295310  |     |
| RBM3         | 0.46676025  | 0.01556945 | 3.91412223  |     |
| FKBP10       | -0.46471990 | 0.01556945 | -3.89228624 | yes |
| RPL36AL      | 0.46257501  | 0.01556945 | 3.86941672  |     |
| TSPAN31      | 0.46714410  | 0.01556945 | 3.91823912  |     |
| SCN4A        | -0.46645978 | 0.01556945 | -3.91090162 |     |
| BCAN         | -0.46509522 | 0.01556945 | -3.89629699 |     |
| SOX9         | -0.46253293 | 0.01556945 | -3.86896898 |     |
| TAL1         | -0.46320075 | 0.01556945 | -3.87607961 | yes |
| UGCG         | 0.46385281  | 0.01556945 | 3.88303063  |     |
| WT1          | -0.46452408 | 0.01556945 | -3.89019481 |     |
| C4orf29      | 0.46555312  | 0.01556945 | 3.90119383  |     |
| AIF1L        | -0.46312731 | 0.01556945 | -3.87529725 |     |
| TATDN1       | 0.46536086  | 0.01556945 | 3.89913734  |     |
| HIATL1       | 0.46564787  | 0.01556945 | 3.90220761  |     |
| UNC5C        | -0.46469625 | 0.01556945 | -3.89203366 |     |
| RGS11        | -0.46800404 | 0.01556945 | -3.92747250 | yes |
| TRIP4        | 0.46648256  | 0.01556945 | 3.91114565  | yes |
| H2AFY        | 0.46431175  | 0.01556945 | 3.88792778  | yes |
| ROD1         | 0.46741478  | 0.01556945 | 3.92114398  | yes |
| UNQ6126      | -0.46188160 | 0.01559390 | -3.86204198 |     |
| LOC100129434 | -0.46080045 | 0.01559390 | -3.85056122 |     |
| PWP1         | 0.46107089  | 0.01559390 | 3.85343098  |     |
| DACH1        | -0.46184874 | 0.01559390 | -3.86169272 |     |
| DLX2         | -0.46136480 | 0.01559390 | -3.85655133 | yes |
| C9orf25      | -0.46095142 | 0.01559390 | -3.85216307 |     |
| TMEM130      | -0.46115850 | 0.01559390 | -3.85436094 |     |
| IKZF2        | 0.46087798  | 0.01559390 | 3.85138373  | yes |
| INHA         | -0.46211671 | 0.01559390 | -3.86454145 |     |
| NHLRC3       | 0.46185831  | 0.01559390 | 3.86179434  |     |
| ARHGAP6      | -0.46080316 | 0.01559390 | -3.85058999 |     |
| ANAPC7       | 0.46155285  | 0.01559390 | 3.85854861  |     |
| PMS2         | 0.46212568  | 0.01559390 | 3.86463683  |     |
| MXRA8        | -0.46222511 | 0.01559390 | -3.86569429 |     |
| SUSD2        | -0.46236970 | 0.01559390 | -3.86723221 |     |
| BARHL1       | -0.46102204 | 0.01559390 | -3.85291245 |     |
| TBX20        | -0.46169923 | 0.01559390 | -3.86010387 |     |
| SLC4A10      | -0.46112801 | 0.01559390 | -3.85403724 |     |
| YWHAB        | 0.46129856  | 0.01559390 | 3.85584792  |     |
| ESX1         | -0.46182581 | 0.01559390 | -3.86144896 |     |
| GPR37L1      | -0.46156557 | 0.01559390 | -3.85868380 |     |
| CAMK2N2      | -0.46161832 | 0.01559390 | -3.85924420 |     |
| TREX2        | -0.46038813 | 0.01561567 | -3.84618856 |     |
| TMEM196      | -0.46051546 | 0.01561567 | -3.84753853 |     |
| LSG1         | 0.46054399  | 0.01561567 | 3.84784106  |     |
| ACSBG2       | -0.46061845 | 0.01561567 | -3.84863070 |     |
| PNPT1        | 0.46044346  | 0.01561567 | 3.84677517  |     |
| PRSS36       | -0.45997945 | 0.01571573 | -3.84185754 |     |



|              |             |            |             |     |
|--------------|-------------|------------|-------------|-----|
| TMEM216      | 0.46008751  | 0.01571573 | 3.84300245  |     |
| OXNAD1       | 0.46002768  | 0.01571573 | 3.84236847  | yes |
| LOC100132755 | -0.45965597 | 0.01575795 | -3.83843171 | yes |
| MEOX1        | -0.45968862 | 0.01575795 | -3.83877742 |     |
| XCL1         | -0.45974809 | 0.01575795 | -3.83940717 |     |
| CILP         | -0.45960819 | 0.01575795 | -3.83792579 |     |
| FIGLA        | -0.45932247 | 0.01587226 | -3.83490175 |     |
| CTSS         | 0.45918129  | 0.01590923 | 3.83340805  |     |
| HSD17B14     | -0.45903439 | 0.01591045 | -3.83185424 | yes |
| PERP         | 0.45909675  | 0.01591045 | 3.83251374  |     |
| HIST1H2BA    | -0.45852219 | 0.01597913 | -3.82643952 |     |
| ZNF575       | -0.45864671 | 0.01597913 | -3.82775538 |     |
| TMEM200B     | -0.45861497 | 0.01597913 | -3.82742001 |     |
| IMP3         | 0.45879815  | 0.01597913 | 3.82935618  |     |
| KLK6         | -0.45847698 | 0.01597913 | -3.82596183 |     |
| VTN          | -0.45855698 | 0.01597913 | -3.82680711 |     |
| SNORD116-1   | -0.45703254 | 0.01602317 | -3.81071915 |     |
| LOC100131120 | -0.45651518 | 0.01602317 | -3.80526887 |     |
| GAS2L1       | -0.45648827 | 0.01602317 | -3.80498555 |     |
| NPFFR2       | -0.45814273 | 0.01602317 | -3.82243119 |     |
| CKMT2        | -0.45648445 | 0.01602317 | -3.80494536 |     |
| ZNF560       | -0.45672746 | 0.01602317 | -3.80750457 |     |
| FNDC7        | -0.45723419 | 0.01602317 | -3.81284480 |     |
| LVRN         | -0.45711327 | 0.01602317 | -3.81157003 |     |
| GABRG3       | -0.45660901 | 0.01602317 | -3.80625695 |     |
| NGDN         | 0.45704595  | 0.01602317 | 3.81086045  |     |
| GDNF         | -0.45636445 | 0.01602317 | -3.80368196 | yes |
| GMPR         | -0.45720713 | 0.01602317 | -3.81255946 |     |
| GPR26        | -0.45682698 | 0.01602317 | -3.80855301 |     |
| GRM8         | -0.45662050 | 0.01602317 | -3.80637806 |     |
| PKN3         | -0.45719769 | 0.01602317 | -3.81245994 | yes |
| NHSL2        | -0.45698265 | 0.01602317 | -3.81019332 |     |
| C9orf139     | -0.45665874 | 0.01602317 | -3.80678075 |     |
| C19orf29OS   | -0.45746374 | 0.01602317 | -3.81526544 |     |
| TMEM41B      | 0.45741021  | 0.01602317 | 3.81470089  |     |
| HTRA1        | -0.45831177 | 0.01602317 | -3.82421642 | yes |
| PSMA5        | 0.45819043  | 0.01602317 | 3.82293491  |     |
| REL          | 0.45714461  | 0.01602317 | 3.81190041  |     |
| SOX1         | -0.45739943 | 0.01602317 | -3.81458712 |     |
| SOX10        | -0.45725461 | 0.01602317 | -3.81306002 |     |
| SPTA1        | -0.45638468 | 0.01602317 | -3.80389485 | yes |
| TTR          | -0.45632515 | 0.01602317 | -3.80326818 |     |
| SNORD114-3   | -0.45717987 | 0.01602317 | -3.81227213 | yes |
| ADAM33       | -0.45674933 | 0.01602317 | -3.80773498 | yes |
| USHBP1       | -0.45638726 | 0.01602317 | -3.80392208 | yes |
| CRADD        | 0.45789932  | 0.01602317 | 3.81986140  |     |
| CD300LB      | -0.45619645 | 0.01602855 | -3.80191363 |     |
| LEFTY2       | -0.45616397 | 0.01602855 | -3.80157176 |     |
| KIAA2013     | -0.45611515 | 0.01602855 | -3.80105806 |     |
| DNASE2B      | -0.45590312 | 0.01605356 | -3.79882730 |     |

|               |             |            |             |     |
|---------------|-------------|------------|-------------|-----|
| TIGD5         | -0.45590078 | 0.01605356 | -3.79880273 |     |
| ACPT          | -0.45586988 | 0.01605356 | -3.79847771 |     |
| WDR40A        | 0.45570101  | 0.01610905 | 3.79670171  |     |
| LOC100128374  | -0.45463478 | 0.01617650 | -3.78550043 |     |
| ASZ1          | -0.45468344 | 0.01617650 | -3.78601113 |     |
| C3orf55       | -0.45502304 | 0.01617650 | -3.78957694 |     |
| HOXC12        | -0.45488759 | 0.01617650 | -3.78815451 | yes |
| HTR1B         | -0.45512910 | 0.01617650 | -3.79069091 |     |
| VSTM2B        | -0.45518949 | 0.01617650 | -3.79132538 |     |
| HCRP1         | -0.45496924 | 0.01617650 | -3.78901190 |     |
| SLC22A10      | -0.45480061 | 0.01617650 | -3.78724119 |     |
| LOC389813     | -0.45453721 | 0.01617650 | -3.78447640 |     |
| LHX1          | -0.45547896 | 0.01617650 | -3.79436723 |     |
| RAB14         | 0.45456409  | 0.01617650 | 3.78475854  |     |
| PTGER3        | -0.45538997 | 0.01617650 | -3.79343200 |     |
| RAF1          | 0.45491865  | 0.01617650 | 3.78848061  |     |
| PPAPDC3       | -0.45492824 | 0.01617650 | -3.78858128 |     |
| RASL10B       | -0.45528276 | 0.01617650 | -3.79230529 | yes |
| GGTLC1        | -0.45466973 | 0.01617650 | -3.78586728 | yes |
| TAS1R3        | -0.45437777 | 0.01622823 | -3.78280347 |     |
| MGC39545      | -0.45406694 | 0.01631931 | -3.77954330 |     |
| SEMA5B        | -0.45401915 | 0.01631931 | -3.77904223 |     |
| BTG1          | 0.45414514  | 0.01631931 | 3.78036336  |     |
| RTN4R         | -0.45385481 | 0.01636624 | -3.77731939 |     |
| MEX3B         | -0.45380629 | 0.01636624 | -3.77681090 |     |
| B3GAT2        | -0.45348069 | 0.01637242 | -3.77339924 |     |
| DEFB116       | -0.45342982 | 0.01637242 | -3.77286632 |     |
| ZNF775        | -0.45356629 | 0.01637242 | -3.77429596 | yes |
| RNASE10       | -0.45341752 | 0.01637242 | -3.77273751 |     |
| VWC2          | -0.45367371 | 0.01637242 | -3.77542144 |     |
| GAL3ST4       | -0.45354612 | 0.01637242 | -3.77408462 | yes |
| GSX1          | -0.45329887 | 0.01640306 | -3.77149492 |     |
| GLUL          | 0.45313811  | 0.01645686 | 3.76981174  |     |
| HHLA1         | -0.45212681 | 0.01649223 | -3.75923354 |     |
| AHCYL1        | 0.45090142  | 0.01649223 | 3.74644048  |     |
| SP7           | -0.45118721 | 0.01649223 | -3.74942172 |     |
| ZNF358        | -0.45129011 | 0.01649223 | -3.75049545 | yes |
| RP11-410N8.4  | -0.45144959 | 0.01649223 | -3.75216012 |     |
| C11orf42      | -0.45092828 | 0.01649223 | -3.74672055 |     |
| NLRP6         | -0.45179997 | 0.01649223 | -3.75581876 |     |
| EIF5          | 0.45169247  | 0.01649223 | 3.75469600  | yes |
| ARHGEF15      | -0.45143670 | 0.01649223 | -3.75202549 | yes |
| C1orf107      | 0.45278758  | 0.01649223 | 3.76614313  |     |
| SIGLEC15      | -0.45091598 | 0.01649223 | -3.74659234 |     |
| MRPL18        | 0.45202420  | 0.01649223 | 3.75816132  |     |
| GTF2F2        | 0.45277686  | 0.01649223 | 3.76603098  |     |
| MNX1          | -0.45277548 | 0.01649223 | -3.76601649 |     |
| LOC347549     | -0.45158643 | 0.01649223 | -3.75358865 |     |
| IGF2          | -0.45255773 | 0.01649223 | -3.76373871 |     |
| DKFZp779M0652 | -0.45207497 | 0.01649223 | -3.75869186 |     |

|              |             |            |             |     |
|--------------|-------------|------------|-------------|-----|
| PEAR1        | -0.45097043 | 0.01649223 | -3.74716026 | yes |
| KRTAP10-11   | -0.45130065 | 0.01649223 | -3.75060555 |     |
| SMAD6        | -0.45261747 | 0.01649223 | -3.76436354 |     |
| PMS2CL       | 0.45147065  | 0.01649223 | 3.75237995  |     |
| RFPL4B       | -0.45166550 | 0.01649223 | -3.75441438 |     |
| NPY6R        | -0.45097877 | 0.01649223 | -3.74724716 |     |
| SLMO2        | 0.45176448  | 0.01649223 | 3.75544803  | yes |
| FBXO40       | -0.45169153 | 0.01649223 | -3.75468620 |     |
| PEX13        | 0.45118180  | 0.01649223 | 3.74936529  | yes |
| NUFIP2       | 0.45101305  | 0.01649223 | 3.74760476  | yes |
| ISLR2        | -0.45234932 | 0.01649223 | -3.76155940 |     |
| EDA2R        | -0.45108361 | 0.01649223 | -3.74834080 |     |
| LOC646471    | -0.45152396 | 0.01649223 | -3.75293647 |     |
| STAR         | -0.45200379 | 0.01649223 | -3.75794805 |     |
| TRIM48       | -0.45198742 | 0.01649223 | -3.75777695 |     |
| ZMAT4        | -0.45144506 | 0.01649223 | -3.75211278 |     |
| LIMD2        | -0.45239449 | 0.01649223 | -3.76203166 |     |
| OR1E1        | -0.45192365 | 0.01649223 | -3.75711075 |     |
| GTF3C4       | 0.45186901  | 0.01649223 | 3.75653994  |     |
| C20orf141    | -0.45064847 | 0.01650320 | -3.74380300 |     |
| HSD17B4      | 0.45073811  | 0.01650320 | 3.74473753  |     |
| FLJ46210     | -0.45071148 | 0.01650320 | -3.74445986 |     |
| MIS12        | 0.45070055  | 0.01650320 | 3.74434593  | yes |
| IL11         | -0.45048007 | 0.01653187 | -3.74204775 |     |
| ABCG4        | -0.45051964 | 0.01653187 | -3.74246013 |     |
| KCNJ9        | -0.45036294 | 0.01653280 | -3.74082715 |     |
| ACTL8        | -0.45040971 | 0.01653280 | -3.74131452 |     |
| FXYP7        | -0.45026880 | 0.01655276 | -3.73984629 |     |
| CILP2        | -0.45011128 | 0.01655686 | -3.73820550 |     |
| EMX1         | -0.45008918 | 0.01655686 | -3.73797529 |     |
| HMX3         | -0.45011090 | 0.01655686 | -3.73820150 |     |
| OLIG1        | -0.44922381 | 0.01656731 | -3.72896930 |     |
| CRYBB1       | -0.44916662 | 0.01656731 | -3.72837455 |     |
| C16orf11     | -0.44955041 | 0.01656731 | -3.73236674 |     |
| DRD3         | -0.44925419 | 0.01656731 | -3.72928516 |     |
| OR56B4       | -0.44977130 | 0.01656731 | -3.73466551 |     |
| FZD2         | -0.44919050 | 0.01656731 | -3.72862286 |     |
| HOXA3        | -0.44935447 | 0.01656731 | -3.73032825 |     |
| LOC387763    | -0.44940976 | 0.01656731 | -3.73090338 |     |
| FLJ45717     | -0.44931647 | 0.01656731 | -3.72993300 |     |
| LOC440461    | -0.44997686 | 0.01656731 | -3.73680568 |     |
| SF3B14       | 0.44931365  | 0.01656731 | 3.72990360  |     |
| VIP          | -0.44988862 | 0.01656731 | -3.73588687 |     |
| DISP2        | -0.44988218 | 0.01656731 | -3.73581979 |     |
| CDC123       | 0.44936932  | 0.01656731 | 3.73048270  |     |
| UAP1L1       | -0.44981399 | 0.01656731 | -3.73510997 | yes |
| PPP1R14A     | -0.44925303 | 0.01656731 | -3.72927310 |     |
| NLRP4        | -0.44904266 | 0.01657424 | -3.72708568 |     |
| EML4         | 0.44906173  | 0.01657424 | 3.72728397  |     |
| LOC100132564 | -0.44807961 | 0.01668890 | -3.71708152 |     |

|           |             |            |             |     |
|-----------|-------------|------------|-------------|-----|
| ARPP-21   | -0.44841367 | 0.01668890 | -3.72054991 | yes |
| RNASE8    | -0.44803307 | 0.01668890 | -3.71659851 |     |
| JSRP1     | -0.44764572 | 0.01668890 | -3.71257963 |     |
| ANKRD60   | -0.44864344 | 0.01668890 | -3.72293665 |     |
| FAM71A    | -0.44835659 | 0.01668890 | -3.71995715 | yes |
| ZFPM1     | -0.44775258 | 0.01668890 | -3.71368802 |     |
| APCDD1L   | -0.44819170 | 0.01668890 | -3.71824506 |     |
| TFIP11    | 0.44769599  | 0.01668890 | 3.71310100  |     |
| C16orf5   | -0.44834957 | 0.01668890 | -3.71988427 |     |
| C2orf71   | -0.44804675 | 0.01668890 | -3.71674045 |     |
| C14orf129 | 0.44846251  | 0.01668890 | 3.72105717  |     |
| CMTM6     | 0.44763960  | 0.01668890 | 3.71251609  |     |
| PRG2-1    | -0.44782548 | 0.01668890 | -3.71444435 |     |
| PRDM13    | -0.44790724 | 0.01668890 | -3.71529272 |     |
| REN       | -0.44822020 | 0.01668890 | -3.71854092 | yes |
| FASTKD5   | 0.44801434  | 0.01668890 | 3.71640408  |     |
| SNORA35   | -0.44763216 | 0.01668890 | -3.71243894 |     |
| EPX       | -0.44790125 | 0.01668890 | -3.71523053 |     |
| ZIC5      | -0.44777351 | 0.01668890 | -3.71390516 |     |
| SCARF2    | -0.44873946 | 0.01668890 | -3.72393433 |     |
| CD58      | 0.44841755  | 0.01668890 | 3.72059021  |     |
| HRASLS5   | -0.44736232 | 0.01680737 | -3.70964091 |     |
| RNF222    | -0.44719529 | 0.01686984 | -3.70790952 |     |
| DCTD      | 0.44699237  | 0.01693897 | 3.70580679  |     |
| HES3      | -0.44696327 | 0.01693897 | -3.70550529 | yes |
| COX6A2    | -0.44685011 | 0.01694442 | -3.70433311 |     |
| NPTXR     | -0.44674035 | 0.01694442 | -3.70319622 |     |
| C3orf1    | 0.44673271  | 0.01694442 | 3.70311717  |     |
| ACSL5     | 0.44668770  | 0.01694442 | 3.70265103  |     |
| PRB1      | -0.44681354 | 0.01694442 | -3.70395429 |     |
| NUBP1     | 0.44662771  | 0.01694835 | 3.70202983  |     |
| HCN1      | -0.44642620 | 0.01697231 | -3.69994371 |     |
| NTRK1     | -0.44649976 | 0.01697231 | -3.70070513 |     |
| ASB16     | -0.44647145 | 0.01697231 | -3.70041214 |     |
| LRRC25    | -0.44598456 | 0.01698521 | -3.69537406 |     |
| CRISP1    | -0.44612441 | 0.01698521 | -3.69682076 |     |
| EGR4      | -0.44604872 | 0.01698521 | -3.69603774 |     |
| IDH3A     | 0.44598826  | 0.01698521 | 3.69541235  | yes |
| C3orf18   | -0.44605459 | 0.01698521 | -3.69609846 |     |
| FAM176B   | -0.44606953 | 0.01698521 | -3.69625295 |     |
| ADM2      | -0.44600440 | 0.01698521 | -3.69557932 |     |
| SLC4A9    | -0.44625514 | 0.01698521 | -3.69817338 |     |
| NAE1      | 0.44592384  | 0.01699007 | 3.69474607  |     |
| NOS3      | -0.44583780 | 0.01699381 | -3.69385630 |     |
| SLC22A17  | -0.44578745 | 0.01699381 | -3.69333568 | yes |
| TBC1D4    | -0.44576176 | 0.01699381 | -3.69307009 | yes |
| NOVA2     | -0.44568578 | 0.01700729 | -3.69228451 |     |
| CHRNA2    | -0.44520280 | 0.01712498 | -3.68729350 |     |
| CTRB1     | -0.44528241 | 0.01712498 | -3.68811589 |     |
| MGC24975  | -0.44524530 | 0.01712498 | -3.68773252 |     |

|              |             |            |             |     |
|--------------|-------------|------------|-------------|-----|
| IL27         | -0.44526519 | 0.01712498 | -3.68793795 |     |
| DAPP1        | 0.44516543  | 0.01712498 | 3.68690750  | yes |
| S1PR5        | -0.44534242 | 0.01712498 | -3.68873585 |     |
| FGF5         | -0.44510225 | 0.01713169 | -3.68625490 |     |
| POLR1B       | 0.44500792  | 0.01715579 | 3.68528077  |     |
| TMEM207      | -0.44476285 | 0.01716144 | -3.68275055 |     |
| ARID3A       | -0.44474371 | 0.01716144 | -3.68255307 |     |
| IFNGR1       | 0.44477022  | 0.01716144 | 3.68282665  |     |
| CAMK1G       | -0.44489821 | 0.01716144 | -3.68414794 |     |
| LOC645605    | -0.44488948 | 0.01716144 | -3.68405781 |     |
| UPRT         | 0.44461625  | 0.01720427 | 3.68123758  |     |
| SUCLG2       | 0.44455645  | 0.01720945 | 3.68062047  |     |
| SNORD116-15  | -0.44449470 | 0.01721575 | -3.67998338 |     |
| RAB39B       | -0.44415127 | 0.01723970 | -3.67644096 |     |
| ITIH3        | -0.44415061 | 0.01723970 | -3.67643416 |     |
| KCNA10       | -0.44420104 | 0.01723970 | -3.67695421 |     |
| BCL2L15      | 0.44437678  | 0.01723970 | 3.67876684  |     |
| PCBP2        | 0.44423171  | 0.01723970 | 3.67727052  |     |
| PRB4         | -0.44428342 | 0.01723970 | -3.67780379 |     |
| RASIP1       | -0.44407340 | 0.01725493 | -3.67563804 | yes |
| LOC100132750 | -0.44332531 | 0.01728437 | -3.66792986 |     |
| TFG          | 0.44388827  | 0.01728437 | 3.67372959  |     |
| RPP38        | 0.44361307  | 0.01728437 | 3.67089374  |     |
| C1QTNF1      | -0.44368543 | 0.01728437 | -3.67163933 | yes |
| TTC39B       | 0.44330825  | 0.01728437 | 3.66775412  | yes |
| NMNAT2       | -0.44349318 | 0.01728437 | -3.66965868 |     |
| TMEM146      | -0.44393046 | 0.01728437 | -3.67416448 |     |
| LY6G6F       | -0.44337858 | 0.01728437 | -3.66847839 |     |
| LAMA1        | -0.44370917 | 0.01728437 | -3.67188389 |     |
| SPIN2B       | -0.44328984 | 0.01728437 | -3.66756456 |     |
| NFE2         | -0.44375880 | 0.01728437 | -3.67239530 | yes |
| SEN2         | 0.44332754  | 0.01728437 | 3.66795277  |     |
| PAX8         | -0.44328006 | 0.01728437 | -3.66746384 |     |
| C8orf76      | 0.44340209  | 0.01728437 | 3.66872050  |     |
| SCRT2        | -0.44347540 | 0.01728437 | -3.66947557 |     |
| RBMXL2       | -0.44312396 | 0.01732433 | -3.66585676 |     |
| ZNF541       | -0.44311098 | 0.01732433 | -3.66572312 |     |
| LBX1         | -0.44283396 | 0.01745240 | -3.66287216 |     |
| OXSM         | 0.44274133  | 0.01747717 | 3.66191920  |     |
| EFNA2        | -0.44268270 | 0.01748283 | -3.66131606 |     |
| DNAJC5G      | -0.44250460 | 0.01750128 | -3.65948430 |     |
| LDHAL6B      | -0.44252751 | 0.01750128 | -3.65971986 |     |
| VPS4B        | 0.44257288  | 0.01750128 | 3.66018649  |     |
| ERCC3        | 0.44243065  | 0.01750224 | 3.65872389  |     |
| OR4F6        | -0.44240633 | 0.01750224 | -3.65847385 |     |
| ZNF213       | -0.44227018 | 0.01755188 | -3.65707407 |     |
| C19orf71     | -0.44205478 | 0.01764661 | -3.65486025 |     |
| UNQ6193      | -0.44183859 | 0.01765110 | -3.65263905 |     |
| CCDC42       | -0.44190556 | 0.01765110 | -3.65332707 |     |
| SLC35D3      | -0.44185067 | 0.01765110 | -3.65276318 |     |

|              |             |            |             |     |
|--------------|-------------|------------|-------------|-----|
| C5orf43      | 0.44195394  | 0.01765110 | 3.65382416  |     |
| ALPK1        | 0.44180711  | 0.01765110 | 3.65231574  | yes |
| AMH          | -0.44173504 | 0.01766491 | -3.65157548 |     |
| RUNDC3A      | -0.44160592 | 0.01768785 | -3.65024945 |     |
| C14orf68     | -0.44150703 | 0.01768785 | -3.64923411 |     |
| LINGO4       | -0.44150427 | 0.01768785 | -3.64920586 |     |
| MARS2        | 0.44156299  | 0.01768785 | 3.64980867  |     |
| RP5-1022P6.2 | 0.44141544  | 0.01771138 | 3.64829390  |     |
| CLTA         | 0.44115103  | 0.01772019 | 3.64558033  |     |
| CRCP         | 0.44122951  | 0.01772019 | 3.64638559  |     |
| FEM1C        | 0.44128316  | 0.01772019 | 3.64693615  |     |
| KIAA1772     | -0.44111667 | 0.01772019 | -3.64522769 |     |
| FOXH1        | -0.44131751 | 0.01772019 | -3.64728872 |     |
| RAB9P1       | -0.44117705 | 0.01772019 | -3.64584725 |     |
| C17orf47     | -0.44086705 | 0.01776746 | -3.64266712 |     |
| C19orf31     | -0.44079926 | 0.01776746 | -3.64197195 |     |
| FLJ14100     | -0.44080963 | 0.01776746 | -3.64207828 |     |
| LRRC16B      | -0.44090055 | 0.01776746 | -3.64301069 |     |
| GABBR2       | -0.44094824 | 0.01776746 | -3.64349984 |     |
| LOC407835    | -0.44069800 | 0.01777199 | -3.64093361 |     |
| ACCN4        | -0.44072174 | 0.01777199 | -3.64117699 |     |
| PPP3R2       | -0.44051072 | 0.01785227 | -3.63901376 |     |
| TMEM85       | 0.44040046  | 0.01788874 | 3.63788365  |     |
| ADORA2B      | 0.44026124  | 0.01790031 | 3.63645715  |     |
| GSC          | -0.44007634 | 0.01790031 | -3.63456297 |     |
| DIMT1L       | 0.44004798  | 0.01790031 | 3.63427252  |     |
| KRT82        | -0.44033220 | 0.01790031 | -3.63718415 |     |
| ATR          | 0.43987257  | 0.01790031 | 3.63247615  |     |
| BTNL2        | -0.43989599 | 0.01790031 | -3.63271595 |     |
| TAF11        | 0.44011063  | 0.01790031 | 3.63491424  |     |
| COQ10B       | 0.43990691  | 0.01790031 | 3.63282786  |     |
| RETNLB       | -0.43987846 | 0.01790031 | -3.63253653 |     |
| ZNF835       | -0.44023194 | 0.01790031 | -3.63615691 |     |
| NEURL        | -0.43988448 | 0.01790031 | -3.63259815 |     |
| SNORD115-7   | -0.43935368 | 0.01791091 | -3.62716543 |     |
| SNORD115-32  | -0.43949070 | 0.01791091 | -3.62856733 |     |
| SLC36A2      | -0.43979608 | 0.01791091 | -3.63169300 |     |
| FOX51        | -0.43952034 | 0.01791091 | -3.62887072 |     |
| DDN          | -0.43968361 | 0.01791091 | -3.63054168 |     |
| RCOR2        | -0.43946956 | 0.01791091 | -3.62835110 | yes |
| ERO1L        | 0.43948959  | 0.01791091 | 3.62855603  |     |
| LOC401296    | -0.43942023 | 0.01791091 | -3.62784627 |     |
| VWA5A        | 0.43959203  | 0.01791091 | 3.62960437  |     |
| CNOT6        | 0.43950985  | 0.01791091 | 3.62876328  | yes |
| FAM62C       | -0.43936305 | 0.01791091 | -3.62726130 |     |
| MOCS3        | 0.43929253  | 0.01791516 | 3.62653983  | yes |
| CECR6        | -0.43925373 | 0.01791516 | -3.62614298 |     |
| LOC492303    | -0.43920865 | 0.01791516 | -3.62568192 |     |
| POU3F3       | -0.43912117 | 0.01791516 | -3.62478724 |     |
| CD72         | -0.43914518 | 0.01791516 | -3.62503273 |     |

|          |             |            |             |     |
|----------|-------------|------------|-------------|-----|
| PGM2L1   | 0.43893104  | 0.01792151 | 3.62284311  | yes |
| XKR5     | -0.43897298 | 0.01792151 | -3.62327185 |     |
| CACNG7   | -0.43896768 | 0.01792151 | -3.62321771 |     |
| QTRTD1   | 0.43896443  | 0.01792151 | 3.62318444  |     |
| TMEM221  | -0.43841341 | 0.01799401 | -3.61755339 |     |
| NXNL1    | -0.43787388 | 0.01799401 | -3.61204463 |     |
| HSPA12B  | -0.43812165 | 0.01799401 | -3.61457380 |     |
| CMTM2    | -0.43862119 | 0.01799401 | -3.61967613 |     |
| TBC1D21  | -0.43760866 | 0.01799401 | -3.60933836 |     |
| C10orf35 | -0.43858936 | 0.01799401 | -3.61935097 |     |
| C10orf27 | -0.43763117 | 0.01799401 | -3.60956800 |     |
| FOXO3    | -0.43813854 | 0.01799401 | -3.61474623 |     |
| LARP5    | 0.43786439  | 0.01799401 | 3.61194771  | yes |
| NPB      | -0.43822935 | 0.01799401 | -3.61567350 |     |
| SALL3    | -0.43827909 | 0.01799401 | -3.61618147 |     |
| OR5J2    | -0.43811309 | 0.01799401 | -3.61448640 |     |
| SLC36A3  | -0.43773013 | 0.01799401 | -3.61057765 |     |
| HCCS     | 0.43792822  | 0.01799401 | 3.61259920  | yes |
| SOX8     | -0.43847363 | 0.01799401 | -3.61816857 |     |
| MPN2     | -0.43853517 | 0.01799401 | -3.61879723 |     |
| KRT1     | -0.43822474 | 0.01799401 | -3.61562642 |     |
| C12orf69 | -0.43769038 | 0.01799401 | -3.61017211 |     |
| ING3     | 0.43820570  | 0.01799401 | 3.61543200  |     |
| RALB     | 0.43793551  | 0.01799401 | 3.61267364  |     |
| CALCB    | -0.43759226 | 0.01799401 | -3.60917111 |     |
| NPAL2    | 0.43757586  | 0.01799401 | 3.60900377  |     |
| OR2C3    | -0.43790960 | 0.01799401 | -3.61240921 |     |
| NCOA3    | 0.43806332  | 0.01799401 | 3.61397830  |     |
| RAB2B    | 0.43838353  | 0.01799401 | 3.61724812  | yes |
| RTCD1    | 0.43857962  | 0.01799401 | 3.61925145  | yes |
| CDK5R2   | -0.43841242 | 0.01799401 | -3.61754329 |     |
| ATG5     | 0.43780675  | 0.01799401 | 3.61135954  |     |
| SYNPO    | -0.43738074 | 0.01808101 | -3.60701369 |     |
| C12orf59 | -0.43718598 | 0.01816818 | -3.60502794 |     |
| FNDC8    | -0.43705771 | 0.01821733 | -3.60372044 |     |
| MRPS31   | 0.43661100  | 0.01828220 | 3.59916902  | yes |
| NTN5     | -0.43663879 | 0.01828220 | -3.59945208 |     |
| COL19A1  | -0.43674683 | 0.01828220 | -3.60055265 |     |
| VPS37D   | -0.43667738 | 0.01828220 | -3.59984519 |     |
| GDF10    | -0.43671083 | 0.01828220 | -3.60018585 |     |
| HRG      | -0.43652846 | 0.01828220 | -3.59832843 |     |
| BEND4    | -0.43651798 | 0.01828220 | -3.59822173 |     |
| TRPM1    | -0.43655570 | 0.01828220 | -3.59860585 |     |
| CMPK1    | 0.43652994  | 0.01828220 | 3.59834349  |     |
| HIST3H3  | -0.43677929 | 0.01828220 | -3.60088332 |     |
| ZNF703   | -0.43638719 | 0.01833334 | -3.59688992 |     |
| KCTD19   | -0.43610200 | 0.01835009 | -3.59398705 |     |
| SERPINB1 | 0.43606238  | 0.01835009 | 3.59358382  |     |
| SEMG2    | -0.43627253 | 0.01835009 | -3.59572269 |     |
| WNK4     | -0.43613316 | 0.01835009 | -3.59430416 |     |



|            |             |            |             |     |
|------------|-------------|------------|-------------|-----|
| GSG1       | -0.43613912 | 0.01835009 | -3.59436475 |     |
| KCNQ4      | -0.43612604 | 0.01835009 | -3.59423165 |     |
| PUM1       | 0.43627943  | 0.01835009 | 3.59579293  |     |
| PPTC7      | 0.43601986  | 0.01835034 | 3.59315118  |     |
| RNU12      | -0.43578406 | 0.01838978 | -3.59075225 |     |
| BMP8B      | -0.43580163 | 0.01838978 | -3.59093105 |     |
| SLC15A5    | -0.43587984 | 0.01838978 | -3.59172654 |     |
| TSC22D4    | -0.43583441 | 0.01838978 | -3.59126447 |     |
| TCP10L     | -0.43563520 | 0.01845198 | -3.58923841 |     |
| KRTAP10-10 | -0.43554612 | 0.01847952 | -3.58833263 |     |
| CPSF3      | 0.43549466  | 0.01848519 | 3.58780934  |     |
| NME4       | -0.43540421 | 0.01851362 | -3.58688986 | yes |
| NRN1L      | -0.43519077 | 0.01856538 | -3.58472056 |     |
| SIRT4      | -0.43526414 | 0.01856538 | -3.58546625 |     |
| MRPL39     | 0.43522364  | 0.01856538 | 3.58505459  | yes |
| KIF26A     | -0.43500356 | 0.01861410 | -3.58281848 |     |
| UNCX       | -0.43494173 | 0.01861410 | -3.58219040 |     |
| PRM3       | -0.43494307 | 0.01861410 | -3.58220411 |     |
| SOCS1      | -0.43494390 | 0.01861410 | -3.58221250 |     |
| TXNDC9     | 0.43452134  | 0.01863161 | 3.57792179  |     |
| PSMD14     | 0.43479790  | 0.01863161 | 3.58072966  |     |
| ZBTB43     | 0.43461069  | 0.01863161 | 3.57882881  |     |
| ZBTB32     | -0.43453019 | 0.01863161 | -3.57801159 |     |
| MORC1      | -0.43423760 | 0.01863161 | -3.57504220 |     |
| MLN        | -0.43451915 | 0.01863161 | -3.57789952 |     |
| ABHD5      | 0.43423209  | 0.01863161 | 3.57498639  |     |
| LOC51145   | -0.43438775 | 0.01863161 | -3.57656584 |     |
| BARX1      | -0.43437442 | 0.01863161 | -3.57643056 |     |
| CPLX3      | -0.43459139 | 0.01863161 | -3.57863282 |     |
| MAGEB17    | -0.43443602 | 0.01863161 | -3.57705579 |     |
| SLC5A2     | -0.43472804 | 0.01863161 | -3.58002030 |     |
| NOX5       | -0.43449591 | 0.01863161 | -3.57766361 |     |
| KRTAP1-3   | -0.43473143 | 0.01863161 | -3.58005467 |     |
| KRTAP3-2   | -0.43424886 | 0.01863161 | -3.57515651 |     |
| NKX6-2     | -0.43454976 | 0.01863161 | -3.57821028 |     |
| IQCB1      | 0.43421556  | 0.01863161 | 3.57481864  |     |
| IGSF5      | -0.43394276 | 0.01868952 | -3.57205149 |     |
| C10orf114  | -0.43397286 | 0.01868952 | -3.57235673 |     |
| OPRK1      | -0.43393355 | 0.01868952 | -3.57195813 | yes |
| FUSSEL18   | -0.43391448 | 0.01868952 | -3.57176470 |     |
| TRH        | -0.43394858 | 0.01868952 | -3.57211046 |     |
| RLBP1      | -0.43386136 | 0.01869704 | -3.57122600 |     |
| IGFALS     | -0.43380283 | 0.01870775 | -3.57063259 |     |
| OR6B3      | -0.43374311 | 0.01871919 | -3.57002708 |     |
| CORT       | -0.43362548 | 0.01876471 | -3.56883465 |     |
| LOC120824  | -0.43353618 | 0.01877003 | -3.56792963 |     |
| SNTA1      | -0.43353888 | 0.01877003 | -3.56795696 | yes |
| BEX1       | -0.43346362 | 0.01877168 | -3.56719426 |     |
| ABCG8      | -0.43345332 | 0.01877168 | -3.56708985 |     |
| OR4K14     | -0.43320284 | 0.01882222 | -3.56455216 |     |

|           |             |            |             |     |
|-----------|-------------|------------|-------------|-----|
| CPT1C     | -0.43312833 | 0.01882222 | -3.56379754 |     |
| GSG1L     | -0.43313980 | 0.01882222 | -3.56391362 |     |
| MYLIP     | 0.43329841  | 0.01882222 | 3.56552034  |     |
| NPM1      | 0.43317593  | 0.01882222 | 3.56427960  |     |
| RAE1      | 0.43328663  | 0.01882222 | 3.56540093  |     |
| TGFB111   | -0.43303987 | 0.01885096 | -3.56290164 | yes |
| ETV5      | -0.43287398 | 0.01885522 | -3.56122193 |     |
| TFAP2E    | -0.43297802 | 0.01885522 | -3.56227528 |     |
| SH2D4B    | -0.43283474 | 0.01885522 | -3.56082472 |     |
| FAM18A    | -0.43286731 | 0.01885522 | -3.56115443 |     |
| PPP4R1    | 0.43292450  | 0.01885522 | 3.56173347  | yes |
| ZNF746    | -0.43279153 | 0.01885744 | -3.56038730 |     |
| LHB       | -0.43269631 | 0.01887040 | -3.55942349 |     |
| SUPV3L1   | 0.43269080  | 0.01887040 | 3.55936775  |     |
| C6orf192  | 0.43235971  | 0.01893385 | 3.55601765  |     |
| IGFL2     | -0.43234806 | 0.01893385 | -3.55589980 |     |
| MYBPHL    | -0.43237860 | 0.01893385 | -3.55620877 |     |
| NIF3L1    | 0.43235363  | 0.01893385 | 3.55595613  |     |
| FGF18     | -0.43239120 | 0.01893385 | -3.55633621 |     |
| CHD1L     | 0.43252841  | 0.01893385 | 3.55772435  |     |
| SLURP1    | -0.43229716 | 0.01894085 | -3.55538497 |     |
| SLC32A1   | -0.43209753 | 0.01895129 | -3.55336608 |     |
| EIF4E1B   | -0.43209705 | 0.01895129 | -3.55336118 |     |
| ARL5A     | 0.43213837  | 0.01895129 | 3.55377903  |     |
| HOXA4     | -0.43208477 | 0.01895129 | -3.55323702 |     |
| NPTX2     | -0.43218258 | 0.01895129 | -3.55422608 |     |
| CDKN2AIP  | 0.43201242  | 0.01897113 | 3.55250552  |     |
| HOXB4     | -0.43189788 | 0.01899073 | -3.55134764 |     |
| HSPA8     | 0.43189788  | 0.01899073 | 3.55134769  |     |
| CACNA1S   | -0.43183389 | 0.01899073 | -3.55070090 |     |
| IGSF21    | -0.43182443 | 0.01899073 | -3.55060526 |     |
| HNRNPK    | 0.43170332  | 0.01901989 | 3.54938130  |     |
| TNFRSF8   | -0.43169801 | 0.01901989 | -3.54932766 |     |
| SCGB1D1   | -0.43164722 | 0.01902715 | -3.54881445 |     |
| GTF2A2    | 0.43152346  | 0.01903213 | 3.54756403  |     |
| OR52K1    | -0.43153811 | 0.01903213 | -3.54771210 |     |
| PYGM      | -0.43154888 | 0.01903213 | -3.54782086 |     |
| CST11     | -0.43119869 | 0.01907494 | -3.54428400 |     |
| AMDHD1    | -0.43114541 | 0.01907494 | -3.54374606 |     |
| NFAM1     | -0.43129202 | 0.01907494 | -3.54522649 |     |
| PACSL1    | -0.43115306 | 0.01907494 | -3.54382334 |     |
| LCE1F     | -0.43130406 | 0.01907494 | -3.54534806 |     |
| LMX1B     | -0.43127953 | 0.01907494 | -3.54510029 |     |
| ANKS1B    | -0.43119646 | 0.01907494 | -3.54426155 |     |
| RASL11B   | -0.43124657 | 0.01907494 | -3.54476746 |     |
| FAM55D    | -0.43108446 | 0.01908853 | -3.54313078 |     |
| CACYBP    | -0.43080951 | 0.01912336 | -3.54035573 |     |
| C3orf70   | -0.43079833 | 0.01912336 | -3.54024288 |     |
| HOXB7     | -0.43081709 | 0.01912336 | -3.54043217 |     |
| LOC729080 | -0.43092921 | 0.01912336 | -3.54156373 |     |

|              |             |            |             |     |
|--------------|-------------|------------|-------------|-----|
| TNFAIP8L2    | -0.43090143 | 0.01912336 | -3.54128336 |     |
| CNTNAP4      | -0.43090888 | 0.01912336 | -3.54135851 |     |
| XIRP1        | -0.43062596 | 0.01917085 | -3.53850381 |     |
| LOC401357    | -0.43065818 | 0.01917085 | -3.53882885 |     |
| SNORD25      | 0.43060527  | 0.01917085 | 3.53829511  |     |
| CCL1         | -0.43049341 | 0.01921507 | -3.53716688 |     |
| C4orf12      | -0.43044370 | 0.01922227 | -3.53666551 |     |
| ELA2         | -0.43035520 | 0.01925267 | -3.53577308 |     |
| OR13C8       | -0.43027757 | 0.01925996 | -3.53499029 |     |
| STGC3        | -0.43026791 | 0.01925996 | -3.53489292 |     |
| RP13-388O5.1 | -0.43017070 | 0.01929568 | -3.53391295 |     |
| LOC100130130 | -0.43005602 | 0.01929644 | -3.53275702 |     |
| SIGLEC8      | -0.43007478 | 0.01929644 | -3.53294605 |     |
| TTC9C        | 0.42998253  | 0.01929644 | 3.53201635  | yes |
| VSTM1        | -0.43007893 | 0.01929644 | -3.53298794 |     |
| FAM60A       | 0.42999436  | 0.01929644 | 3.53213553  | yes |
| ZNF840       | -0.42973947 | 0.01933844 | -3.52956743 |     |
| PRRT2        | -0.42965918 | 0.01933844 | -3.52875859 |     |
| COL11A1      | -0.42970001 | 0.01933844 | -3.52916990 |     |
| AGTR1        | -0.42959993 | 0.01933844 | -3.52816187 |     |
| C12orf12     | -0.42954142 | 0.01933844 | -3.52757258 |     |
| HELT         | -0.42975539 | 0.01933844 | -3.52972773 |     |
| CACNG8       | -0.42955691 | 0.01933844 | -3.52772861 |     |
| SNORA60      | -0.42982350 | 0.01933844 | -3.53041396 |     |
| NKX2-1       | -0.42974158 | 0.01933844 | -3.52958868 |     |
| FBXL18       | -0.42963238 | 0.01933844 | -3.52848871 |     |
| CATSPER1     | -0.42949163 | 0.01934616 | -3.52707123 |     |
| TNFSF9       | -0.42941504 | 0.01936997 | -3.52630008 |     |
| CA2          | -0.42933691 | 0.01939475 | -3.52551348 |     |
| FAM43B       | -0.42903126 | 0.01942069 | -3.52243712 |     |
| HBD          | -0.42909765 | 0.01942069 | -3.52310516 |     |
| HOXD9        | -0.42925559 | 0.01942069 | -3.52469481 |     |
| TGM6         | -0.42911909 | 0.01942069 | -3.52332093 |     |
| IL10         | -0.42898741 | 0.01942069 | -3.52199588 |     |
| KRTAP10-2    | -0.42892371 | 0.01942069 | -3.52135498 |     |
| C1QL3        | -0.42890426 | 0.01942069 | -3.52115930 |     |
| AVPR1A       | -0.42911590 | 0.01942069 | -3.52328883 |     |
| CCL3         | -0.42889109 | 0.01942069 | -3.52102687 |     |
| DLGAP2       | -0.42902838 | 0.01942069 | -3.52240819 |     |
| ProSAPiP1    | -0.42907754 | 0.01942069 | -3.52290285 | yes |
| OR10A5       | -0.42859814 | 0.01942724 | -3.51808043 |     |
| CTNNA3       | -0.42863580 | 0.01942724 | -3.51845911 |     |
| MAZ          | -0.42870616 | 0.01942724 | -3.51916667 |     |
| ATP8A2       | -0.42868555 | 0.01942724 | -3.51895939 |     |
| PLA2G2F      | -0.42884211 | 0.01942724 | -3.52053410 |     |
| SHB          | -0.42879791 | 0.01942724 | -3.52008950 |     |
| SOD3         | -0.42859016 | 0.01942724 | -3.51800019 |     |
| ZNF136       | 0.42876478  | 0.01942724 | 3.51975633  |     |
| ECHDC1       | 0.42850514  | 0.01945661 | 3.51714531  | yes |
| BTBD1        | 0.42846809  | 0.01945721 | 3.51677279  | yes |

|              |             |            |             |     |
|--------------|-------------|------------|-------------|-----|
| ABCA13       | 0.42825803  | 0.01945798 | 3.51466139  |     |
| BHLHE22      | -0.42829810 | 0.01945798 | -3.51506407 |     |
| HMHMB1       | -0.42834494 | 0.01945798 | -3.51553486 |     |
| GFRA4        | -0.42830000 | 0.01945798 | -3.51508321 |     |
| DPEP3        | -0.42825122 | 0.01945798 | -3.51459294 |     |
| PSD2         | -0.42832422 | 0.01945798 | -3.51532663 |     |
| C10orf104    | 0.42817050  | 0.01948495 | 3.51378174  |     |
| SIX5         | -0.42811190 | 0.01949510 | -3.51319293 |     |
| SHANK1       | -0.42808209 | 0.01949510 | -3.51289335 |     |
| ICK          | 0.42799599  | 0.01952540 | 3.51202833  |     |
| RALGPS2      | 0.42790598  | 0.01953665 | 3.51112420  | yes |
| TACR2        | -0.42793544 | 0.01953665 | -3.51142015 |     |
| GSC2         | -0.42782361 | 0.01956482 | -3.51029683 |     |
| C19orf20     | -0.42775196 | 0.01958656 | -3.50957733 |     |
| hCG_1644301  | -0.42760416 | 0.01959235 | -3.50809330 |     |
| IMPA2        | 0.42766663  | 0.01959235 | 3.50872043  |     |
| FAM69A       | 0.42756498  | 0.01959235 | 3.50769990  |     |
| TOX2         | -0.42766773 | 0.01959235 | -3.50873154 |     |
| RQCD1        | 0.42757111  | 0.01959235 | 3.50776145  | yes |
| KCNK18       | -0.42745537 | 0.01963716 | -3.50659958 |     |
| TXNDC12      | 0.42737836  | 0.01964100 | 3.50582663  |     |
| AIG1         | 0.42738898  | 0.01964100 | 3.50593329  | yes |
| NDUFA4L2     | -0.42731227 | 0.01965961 | -3.50516346 |     |
| C1QL1        | -0.42723763 | 0.01966214 | -3.50441447 |     |
| C13orf28     | -0.42724253 | 0.01966214 | -3.50446363 |     |
| PRSS23       | 0.42714288  | 0.01967691 | 3.50346377  |     |
| C16orf59     | -0.42716272 | 0.01967691 | -3.50366279 |     |
| TSPAN10      | -0.42710657 | 0.01967763 | -3.50309954 |     |
| NKPD1        | -0.42691624 | 0.01968687 | -3.50119038 |     |
| APLP1        | -0.42700875 | 0.01968687 | -3.50211827 |     |
| ARHGDIG      | -0.42692471 | 0.01968687 | -3.50127530 |     |
| DHH          | -0.42692702 | 0.01968687 | -3.50129853 | yes |
| JAGN1        | 0.42696996  | 0.01968687 | 3.50172920  |     |
| PSME3        | 0.42677993  | 0.01970603 | 3.49982353  |     |
| WDR3         | 0.42680801  | 0.01970603 | 3.50010508  |     |
| BPI          | -0.42678449 | 0.01970603 | -3.49986925 |     |
| LOC100129572 | -0.42661895 | 0.01970886 | -3.49820962 |     |
| C10orf129    | -0.42672416 | 0.01970886 | -3.49926437 |     |
| GAP43        | -0.42658067 | 0.01970886 | -3.49782591 |     |
| ZC3H12B      | -0.42668226 | 0.01970886 | -3.49884425 |     |
| KCNK1        | 0.42663358  | 0.01970886 | 3.49835622  |     |
| NR2E1        | -0.42656687 | 0.01970886 | -3.49768756 |     |
| LOC729135    | -0.42652937 | 0.01971060 | -3.49731168 |     |
| OR10P1       | -0.42641976 | 0.01975379 | -3.49621312 |     |
| ST8SIA4      | 0.42638889  | 0.01975379 | 3.49590378  |     |
| HMGB1L10     | 0.42634045  | 0.01976222 | 3.49541841  |     |
| PRH2         | -0.42629700 | 0.01976765 | -3.49498306 |     |
| PRPS2        | 0.42619854  | 0.01980647 | 3.49399662  |     |
| MYL12B       | 0.42591196  | 0.01983638 | 3.49112644  |     |
| SACM1L       | 0.42604727  | 0.01983638 | 3.49248148  |     |

|               |             |            |             |     |
|---------------|-------------|------------|-------------|-----|
| C8orf46       | -0.42580637 | 0.01983638 | -3.49006921 |     |
| COL24A1       | -0.42583341 | 0.01983638 | -3.49033988 |     |
| GLI4          | -0.42607094 | 0.01983638 | -3.49271852 |     |
| HAS1          | -0.42582940 | 0.01983638 | -3.49029981 | yes |
| OR14I1        | -0.42582014 | 0.01983638 | -3.49020702 |     |
| LOC442668     | -0.42591669 | 0.01983638 | -3.49117375 |     |
| DSCR6         | -0.42593616 | 0.01983638 | -3.49136873 | yes |
| FBLIM1        | -0.42593731 | 0.01983638 | -3.49138022 |     |
| TCL6          | -0.42544632 | 0.01996098 | -3.48646558 |     |
| LOC439951     | -0.42551212 | 0.01996098 | -3.48712400 |     |
| DNM1P33       | -0.42543118 | 0.01996098 | -3.48631406 |     |
| LRFN1         | -0.42547101 | 0.01996098 | -3.48671261 |     |
| ZNF28         | 0.42539745  | 0.01996098 | 3.48597656  |     |
| PARP8         | 0.42554423  | 0.01996098 | 3.48744528  |     |
| SAMD12        | 0.42534729  | 0.01997087 | 3.48547473  |     |
| SLC30A6       | 0.42517191  | 0.02005741 | 3.48372037  |     |
| DPY30         | 0.42512962  | 0.02006254 | 3.48329748  | yes |
| API5          | 0.42507430  | 0.02007570 | 3.48274424  |     |
| SNORD59B      | 0.42499272  | 0.02010499 | 3.48192842  |     |
| PPAPDC1A      | -0.42489641 | 0.02012786 | -3.48096550 |     |
| ICAM5         | -0.42488790 | 0.02012786 | -3.48088041 |     |
| SS18          | 0.42472109  | 0.02020976 | 3.47921304  | yes |
| DEFA5         | -0.42461809 | 0.02025251 | -3.47818361 |     |
| AP3S2         | 0.42380617  | 0.02028209 | 3.47007515  |     |
| PTGES3        | 0.42368133  | 0.02028209 | 3.46882934  |     |
| RP11-431O22.2 | -0.42450142 | 0.02028209 | -3.47701789 |     |
| TRYX3         | -0.42372433 | 0.02028209 | -3.46925842 |     |
| C6orf221      | -0.42381943 | 0.02028209 | -3.47020748 |     |
| DRP2          | -0.42390740 | 0.02028209 | -3.47108562 |     |
| OR9Q2         | -0.42408245 | 0.02028209 | -3.47283315 |     |
| AVL9          | 0.42390089  | 0.02028209 | 3.47102060  |     |
| FRZB          | -0.42386614 | 0.02028209 | -3.47067375 |     |
| FAM19A5       | -0.42430620 | 0.02028209 | -3.47506764 |     |
| IL1F5         | -0.42390361 | 0.02028209 | -3.47104771 |     |
| LOC284297     | -0.42443930 | 0.02028209 | -3.47639727 |     |
| KLHL38        | -0.42421999 | 0.02028209 | -3.47420663 |     |
| QRFP          | -0.42417137 | 0.02028209 | -3.47372111 |     |
| ENHO          | -0.42431365 | 0.02028209 | -3.47514206 |     |
| C13orf36      | -0.42430204 | 0.02028209 | -3.47502611 |     |
| GTF2H5        | 0.42392116  | 0.02028209 | 3.47122295  |     |
| FAM108B1      | 0.42439975  | 0.02028209 | 3.47600209  |     |
| ADAMTSL4      | -0.42402904 | 0.02028209 | -3.47229991 |     |
| GJC2          | -0.42367068 | 0.02028209 | -3.46872308 |     |
| DMRTB1        | -0.42369920 | 0.02028209 | -3.46900762 |     |
| EPC1          | 0.42400402  | 0.02028209 | 3.47205013  |     |
| SGPL1         | 0.42378181  | 0.02028209 | 3.46983206  |     |
| MED20         | 0.42367205  | 0.02028209 | 3.46873673  |     |
| ADAMTS2       | -0.42430031 | 0.02028209 | -3.47500879 |     |
| SART3         | 0.42405449  | 0.02028209 | 3.47255405  |     |
| NUPL1         | 0.42407871  | 0.02028209 | 3.47279579  | yes |

|              |             |            |             |     |
|--------------|-------------|------------|-------------|-----|
| MYADML       | -0.42354713 | 0.02031777 | -3.46749029 |     |
| GRM1         | -0.42355567 | 0.02031777 | -3.46757558 |     |
| KIAA1191     | 0.42324976  | 0.02046971 | 3.46452432  |     |
| ISL2         | -0.42323629 | 0.02046971 | -3.46438999 |     |
| IL31         | -0.42303827 | 0.02057266 | -3.46241574 |     |
| LOC100129858 | -0.42144455 | 0.02058947 | -3.44654802 |     |
| LOC100129890 | -0.42202443 | 0.02058947 | -3.45231703 |     |
| LOC100131763 | -0.42112814 | 0.02058947 | -3.44340234 |     |
| LOC100133131 | -0.42281150 | 0.02058947 | -3.46015547 |     |
| CDK7         | 0.42286840  | 0.02058947 | 3.46072253  |     |
| CHRM2        | -0.42105495 | 0.02058947 | -3.44267491 |     |
| FAM24A       | -0.42232306 | 0.02058947 | -3.45528993 |     |
| WFIKK2       | -0.42162680 | 0.02058947 | -3.44836059 |     |
| OSCAR        | -0.42178010 | 0.02058947 | -3.44988565 |     |
| UROC1        | -0.42169855 | 0.02058947 | -3.44907428 |     |
| OR2A14       | -0.42201593 | 0.02058947 | -3.45223239 |     |
| LDLRAD3      | -0.42190869 | 0.02058947 | -3.45116513 |     |
| MESP2        | -0.42172781 | 0.02058947 | -3.44936538 |     |
| ARL6IP6      | 0.42232487  | 0.02058947 | 3.45530796  |     |
| CCDC140      | -0.42240338 | 0.02058947 | -3.45608980 |     |
| GDF7         | -0.42225959 | 0.02058947 | -3.45465802 |     |
| FLJ36031     | -0.42237396 | 0.02058947 | -3.45579680 |     |
| FAM9A        | -0.42137338 | 0.02058947 | -3.44584033 |     |
| DYNC11I      | -0.42164328 | 0.02058947 | -3.44852450 |     |
| EDN1         | -0.42115243 | 0.02058947 | -3.44364372 | yes |
| METTL7B      | -0.42269188 | 0.02058947 | -3.45896361 | yes |
| GGN          | -0.42115969 | 0.02058947 | -3.44371592 |     |
| SLFNL1       | -0.42176072 | 0.02058947 | -3.44969280 |     |
| RANBP3L      | -0.42285944 | 0.02058947 | -3.46063325 |     |
| OR8J1        | -0.42163237 | 0.02058947 | -3.44841594 |     |
| FGL1         | -0.42182535 | 0.02058947 | -3.45033585 |     |
| RPIA         | 0.42277434  | 0.02058947 | 3.45978525  |     |
| FOXD2        | -0.42178274 | 0.02058947 | -3.44991194 |     |
| FBXO8        | 0.42110309  | 0.02058947 | 3.44315339  |     |
| GATA6        | -0.42175773 | 0.02058947 | -3.44966309 |     |
| GPR27        | -0.42207845 | 0.02058947 | -3.45285466 |     |
| TBK1         | 0.42099335  | 0.02058947 | 3.44206272  |     |
| GUCA2A       | -0.42212304 | 0.02058947 | -3.45329853 |     |
| ZAR1         | -0.42148048 | 0.02058947 | -3.44690526 |     |
| KLK3         | -0.42155597 | 0.02058947 | -3.44765609 |     |
| KRTAP10-1    | -0.42239303 | 0.02058947 | -3.45598670 |     |
| SPDYC        | -0.42176890 | 0.02058947 | -3.44977424 |     |
| RPL7P48      | -0.42229774 | 0.02058947 | -3.45503789 |     |
| FLJ44817     | -0.42110055 | 0.02058947 | -3.44312806 |     |
| C5orf40      | -0.42276196 | 0.02058947 | -3.45966185 |     |
| ART1         | -0.42172980 | 0.02058947 | -3.44938518 |     |
| ATIC         | 0.42125946  | 0.02058947 | 3.44470772  |     |
| TMED7        | 0.42107541  | 0.02058947 | 3.44287826  |     |
| APTX         | 0.42208361  | 0.02058947 | 3.45290602  | yes |
| WDR70        | 0.42155263  | 0.02058947 | 3.44762284  |     |

|          |             |            |             |     |
|----------|-------------|------------|-------------|-----|
| ANO1     | -0.42199572 | 0.02058947 | -3.45203121 |     |
| PSMA1    | 0.42161566  | 0.02058947 | 3.44824981  |     |
| MEIS3    | -0.42134232 | 0.02058947 | -3.44553153 |     |
| PSMC5    | 0.42186575  | 0.02058947 | 3.45073787  |     |
| KIAA1239 | -0.42096926 | 0.02058947 | -3.44182339 |     |
| SNORA3   | -0.42173196 | 0.02058947 | -3.44940670 |     |
| RTN2     | -0.42098557 | 0.02058947 | -3.44198544 |     |
| CARD9    | -0.42207361 | 0.02058947 | -3.45280655 |     |
| LCAP     | -0.42203135 | 0.02058947 | -3.45238583 |     |
| FABP12   | -0.42253626 | 0.02058947 | -3.45741325 |     |
| ST6GAL1  | 0.42170095  | 0.02058947 | 3.44909816  |     |
| SMO      | -0.42099077 | 0.02058947 | -3.44203708 |     |
| VIPR2    | -0.42130644 | 0.02058947 | -3.44517480 |     |
| FRMD1    | -0.42125121 | 0.02058947 | -3.44462568 |     |
| CALN1    | -0.42194136 | 0.02058947 | -3.45149022 |     |
| SCARF1   | -0.42293358 | 0.02058947 | -3.46137217 |     |
| MCART1   | -0.42255473 | 0.02058947 | -3.45759727 |     |
| STXBP5L  | -0.42281096 | 0.02058947 | -3.46015018 |     |
| SETDB1   | 0.42107258  | 0.02058947 | 3.44285016  |     |
| ANGPT4   | -0.42091412 | 0.02060446 | -3.44127544 |     |
| DENND1B  | 0.42085802  | 0.02060957 | 3.44071811  |     |
| ELOVL5   | 0.42081297  | 0.02060957 | 3.44027046  |     |
| AMMECR1L | 0.42081583  | 0.02060957 | 3.44029894  |     |
| FAM175B  | 0.42066060  | 0.02066589 | 3.43875695  |     |
| TULP1    | -0.42066215 | 0.02066589 | -3.43877239 |     |
| NPAS1    | -0.42062245 | 0.02067042 | -3.43837807 |     |
| CHRN3    | -0.42043950 | 0.02072602 | -3.43656133 |     |
| COL5A1   | -0.42028930 | 0.02072602 | -3.43507020 | yes |
| ANKRD1   | -0.42040978 | 0.02072602 | -3.43626619 |     |
| GPD1     | -0.42043923 | 0.02072602 | -3.43655858 | yes |
| RAX      | -0.42037776 | 0.02072602 | -3.43594831 |     |
| ESSPL    | -0.42024687 | 0.02072602 | -3.43464904 |     |
| GALNTL6  | -0.42022581 | 0.02072602 | -3.43443992 |     |
| PSMB1    | 0.42042144  | 0.02072602 | 3.43638201  |     |
| RHO      | -0.42025924 | 0.02072602 | -3.43477176 |     |
| MGC13057 | -0.42033037 | 0.02072602 | -3.43547790 |     |
| RPS7P4   | -0.42006259 | 0.02077063 | -3.43282013 |     |
| EFHA1    | 0.42007873  | 0.02077063 | 3.43298022  |     |
| TPT1     | 0.42007524  | 0.02077063 | 3.43294562  |     |
| RPSA     | 0.41998177  | 0.02078299 | 3.43201815  |     |
| OR14J1   | -0.42000885 | 0.02078299 | -3.43228687 |     |
| LASS1    | -0.41958177 | 0.02082605 | -3.42805063 |     |
| LILRA3   | -0.41942935 | 0.02082605 | -3.42653943 |     |
| CHRM4    | -0.41939786 | 0.02082605 | -3.42622729 |     |
| ABHD3    | 0.41973805  | 0.02082605 | 3.42960048  |     |
| ITGB3BP  | 0.41961833  | 0.02082605 | 3.42841313  |     |
| GLI1     | -0.41985604 | 0.02082605 | -3.43077080 | yes |
| GPR3     | -0.41939812 | 0.02082605 | -3.42622984 |     |
| HSD3B1   | -0.41981014 | 0.02082605 | -3.43031546 |     |
| LYN      | 0.41945761  | 0.02082605 | 3.42681957  |     |



|             |             |            |             |     |
|-------------|-------------|------------|-------------|-----|
| TMEM89      | -0.41942885 | 0.02082605 | -3.42653443 |     |
| PDE3A       | -0.41983205 | 0.02082605 | -3.43053288 |     |
| FBXO34      | 0.41969177  | 0.02082605 | 3.42914150  |     |
| PDIA2       | -0.41955382 | 0.02082605 | -3.42777351 |     |
| ZNF205      | -0.41950758 | 0.02082605 | -3.42731504 |     |
| MCEE        | 0.41963590  | 0.02082605 | 3.42858741  |     |
| XPR1        | 0.41966926  | 0.02082605 | 3.42891822  |     |
| TM9SF2      | 0.41956533  | 0.02082605 | 3.42788760  |     |
| PRDX3       | 0.41904448  | 0.02087310 | 3.42272511  |     |
| RDH10       | 0.41910488  | 0.02087310 | 3.42332359  |     |
| PLAC9       | -0.41920602 | 0.02087310 | -3.42432581 | yes |
| IBSP        | -0.41925301 | 0.02087310 | -3.42479146 |     |
| TRIM67      | -0.41917060 | 0.02087310 | -3.42397484 |     |
| SYNJ2BP     | 0.41910932  | 0.02087310 | 3.42336758  |     |
| GRK1        | -0.41918259 | 0.02087310 | -3.42409366 |     |
| hCG_2039146 | -0.41913704 | 0.02087310 | -3.42364220 |     |
| CASP8       | 0.41902295  | 0.02087310 | 3.42251178  |     |
| HTRA3       | -0.41902830 | 0.02087310 | -3.42256484 |     |
| FRMD5       | -0.41897928 | 0.02088176 | -3.42207918 |     |
| MOGAT1      | -0.41871337 | 0.02089377 | -3.41944544 |     |
| DOPEY1      | 0.41857428  | 0.02089377 | 3.41806820  | yes |
| OR2L2       | -0.41874237 | 0.02089377 | -3.41973263 |     |
| TESSP2      | -0.41867140 | 0.02089377 | -3.41902979 |     |
| IGFBPL1     | -0.41879126 | 0.02089377 | -3.42021679 |     |
| KRTAP10-7   | -0.41858051 | 0.02089377 | -3.41812991 |     |
| NGF         | -0.41869028 | 0.02089377 | -3.41921677 |     |
| TBX22       | -0.41870211 | 0.02089377 | -3.41933387 |     |
| PCSK1       | -0.41872223 | 0.02089377 | -3.41953314 |     |
| PSMD11      | 0.41859593  | 0.02089377 | 3.41828253  |     |
| S100A1      | -0.41865135 | 0.02089377 | -3.41883133 |     |
| SLC34A1     | -0.41879462 | 0.02089377 | -3.42025011 |     |
| HSPB3       | -0.41878606 | 0.02089377 | -3.42016524 |     |
| GDAP1L1     | -0.41851566 | 0.02091200 | -3.41748781 |     |
| TAF13       | 0.41846879  | 0.02092288 | 3.41702382  |     |
| TRIM17      | -0.41842640 | 0.02093097 | -3.41660428 |     |
| GTF2E1      | 0.41833398  | 0.02095200 | 3.41568948  |     |
| IMPA1       | 0.41833566  | 0.02095200 | 3.41570616  | yes |
| FAM19A4     | -0.41829076 | 0.02096066 | -3.41526179 |     |
| YTHDF3      | 0.41807299  | 0.02105118 | 3.41310703  |     |
| GRIK5       | -0.41809894 | 0.02105118 | -3.41336375 |     |
| TMEM159     | 0.41805859  | 0.02105118 | 3.41296458  |     |
| CSNK1A1     | 0.41799475  | 0.02105446 | 3.41233300  | yes |
| PRRT1       | -0.41800971 | 0.02105446 | -3.41248105 |     |
| VRK2        | 0.41791073  | 0.02108894 | 3.41150194  | yes |
| LAG3        | -0.41781543 | 0.02112345 | -3.41055947 |     |
| ZDHHC13     | 0.41779750  | 0.02112345 | 3.41038216  | yes |
| LIPI        | -0.41774222 | 0.02113990 | -3.40983546 |     |
| ZCCHC5      | -0.41762129 | 0.02117735 | -3.40863982 |     |
| EXTL1       | -0.41762562 | 0.02117735 | -3.40868269 |     |
| TMEM215     | -0.41759541 | 0.02117735 | -3.40838401 |     |

|          |             |            |             |     |
|----------|-------------|------------|-------------|-----|
| PSRC1    | -0.41753943 | 0.02119433 | -3.40783064 |     |
| DPYSL4   | -0.41743853 | 0.02121792 | -3.40683331 |     |
| C1orf65  | -0.41740713 | 0.02121792 | -3.40652299 |     |
| UPK3A    | -0.41738582 | 0.02121792 | -3.40631235 |     |
| KCNH6    | -0.41741719 | 0.02121792 | -3.40662232 |     |
| SYDE1    | -0.41734783 | 0.02122359 | -3.40593695 | yes |
| CARKD    | 0.41724985  | 0.02126730 | 3.40496875  |     |
| CPLX1    | -0.41717868 | 0.02127195 | -3.40426560 |     |
| ZNF385C  | -0.41715561 | 0.02127195 | -3.40403759 |     |
| EVX1     | -0.41720603 | 0.02127195 | -3.40453577 |     |
| LRRC9    | -0.41712324 | 0.02127414 | -3.40371787 |     |
| C1orf161 | -0.41691538 | 0.02127470 | -3.40166472 |     |
| CSN1S1   | -0.41688454 | 0.02127470 | -3.40136022 |     |
| RNF149   | 0.41692687  | 0.02127470 | 3.40177825  |     |
| TLX2     | -0.41689303 | 0.02127470 | -3.40144405 |     |
| KRTDAP   | -0.41686302 | 0.02127470 | -3.40114769 |     |
| FXD3     | 0.41706037  | 0.02127470 | 3.40309676  |     |
| C1orf56  | -0.41702275 | 0.02127470 | -3.40272517 |     |
| NECAB1   | -0.41690300 | 0.02127470 | -3.40154247 |     |
| HTR3B    | -0.41694129 | 0.02127470 | -3.40192069 |     |
| ARPM1    | -0.41681525 | 0.02128679 | -3.40067599 |     |
| GPC2     | -0.41673169 | 0.02130342 | -3.39985095 |     |
| MRPS35   | 0.41675140  | 0.02130342 | 3.40004553  |     |
| RAPGEF3  | -0.41655033 | 0.02134804 | -3.39806067 | yes |
| ZDHHC8P  | -0.41652403 | 0.02134804 | -3.39780108 |     |
| PNPLA5   | -0.41644689 | 0.02134804 | -3.39703974 |     |
| FAAH2    | 0.41647791  | 0.02134804 | 3.39734584  |     |
| QPRT     | -0.41643284 | 0.02134804 | -3.39690111 |     |
| PLSCR1   | 0.41648289  | 0.02134804 | 3.39739501  |     |
| IL20RA   | 0.41652701  | 0.02134804 | 3.39783048  |     |
| JHDM1D   | 0.41659521  | 0.02134804 | 3.39850365  | yes |
| F7       | -0.41637338 | 0.02136774 | -3.39631428 |     |
| DLGAP4   | -0.41617221 | 0.02138729 | -3.39432960 |     |
| EGLN1    | -0.41620606 | 0.02138729 | -3.39466352 |     |
| PPM2C    | 0.41623057  | 0.02138729 | 3.39490530  |     |
| SLC6A2   | -0.41618461 | 0.02138729 | -3.39445189 |     |
| NRSN2    | -0.41628364 | 0.02138729 | -3.39542884 |     |
| CHST1    | -0.41620358 | 0.02138729 | -3.39463898 |     |
| CHL1     | 0.41601609  | 0.02146867 | 3.39278971  |     |
| SLC17A2  | -0.41522677 | 0.02150550 | -3.38500985 |     |
| C3orf24  | -0.41511398 | 0.02150550 | -3.38389890 |     |
| CNGA2    | -0.41520359 | 0.02150550 | -3.38478143 |     |
| RLBP1L2  | -0.41557228 | 0.02150550 | -3.38841411 |     |
| IRX2     | -0.41535230 | 0.02150550 | -3.38624645 |     |
| ADAMTS16 | -0.41583784 | 0.02150550 | -3.39103194 |     |
| LRRC55   | -0.41550047 | 0.02150550 | -3.38770642 |     |
| EFR3A    | 0.41569248  | 0.02150550 | 3.38959891  |     |
| KIAA1024 | -0.41509019 | 0.02150550 | -3.38366458 |     |
| LYSMD2   | -0.41514482 | 0.02150550 | -3.38420259 |     |
| FBXO10   | -0.41588715 | 0.02150550 | -3.39151813 | yes |

|           |             |            |             |     |
|-----------|-------------|------------|-------------|-----|
| TCEAL5    | -0.41579823 | 0.02150550 | -3.39064139 |     |
| ITGAD     | -0.41529170 | 0.02150550 | -3.38564946 |     |
| MYO1B     | 0.41544611  | 0.02150550 | 3.38717076  |     |
| NTRK3     | -0.41592269 | 0.02150550 | -3.39186860 |     |
| KCNK4     | -0.41511339 | 0.02150550 | -3.38389303 |     |
| FAM135B   | -0.41513036 | 0.02150550 | -3.38406020 |     |
| IRAK4     | 0.41509550  | 0.02150550 | 3.38371688  |     |
| SNX7      | 0.41565129  | 0.02150550 | 3.38919288  |     |
| PDE4C     | -0.41517274 | 0.02150550 | -3.38447763 |     |
| PCDHA3    | -0.41570000 | 0.02150550 | -3.38967302 |     |
| WDR45L    | 0.41547465  | 0.02150550 | 3.38745198  | yes |
| MANBAL    | 0.41511293  | 0.02150550 | 3.38388854  |     |
| DCLRE1C   | 0.41545312  | 0.02150550 | 3.38723983  |     |
| TPTE      | -0.41510104 | 0.02150550 | -3.38377141 |     |
| SF3A2     | -0.41520131 | 0.02150550 | -3.38475898 |     |
| C2orf16   | -0.41574250 | 0.02150550 | -3.39009202 |     |
| C3orf39   | -0.41566623 | 0.02150550 | -3.38934012 |     |
| CCKBR     | -0.41571347 | 0.02150550 | -3.38980588 |     |
| OTOP2     | -0.41545220 | 0.02150550 | -3.38723081 |     |
| EFTUD2    | 0.41536514  | 0.02150550 | 3.38637296  |     |
| COX6B2    | -0.41499173 | 0.02150612 | -3.38269494 |     |
| KLF17     | -0.41492734 | 0.02150612 | -3.38206087 |     |
| OR4C6     | -0.41492348 | 0.02150612 | -3.38202292 |     |
| ZDHHC22   | -0.41493416 | 0.02150612 | -3.38212810 |     |
| SPATC1    | -0.41506098 | 0.02150612 | -3.38337690 |     |
| HES7      | -0.41492726 | 0.02150612 | -3.38206010 |     |
| DPF1      | -0.41481593 | 0.02155712 | -3.38096407 |     |
| ADCY8     | -0.41467748 | 0.02160119 | -3.37960117 |     |
| CTNNA1    | 0.41463687  | 0.02160119 | 3.37920154  |     |
| TMEM9B    | 0.41465138  | 0.02160119 | 3.37934434  |     |
| ANKRD55   | -0.41463880 | 0.02160119 | -3.37922054 |     |
| C5orf50   | -0.41456645 | 0.02162866 | -3.37850846 |     |
| LOC152118 | -0.41420414 | 0.02166713 | -3.37494403 |     |
| NKX2-3    | -0.41412690 | 0.02166713 | -3.37418437 |     |
| THAP8     | -0.41439418 | 0.02166713 | -3.37681346 |     |
| MYT1L     | -0.41440760 | 0.02166713 | -3.37694550 |     |
| KIAA0746  | 0.41421414  | 0.02166713 | 3.37504243  |     |
| BCL2L13   | 0.41415382  | 0.02166713 | 3.37444920  |     |
| TBX21     | -0.41424355 | 0.02166713 | -3.37533171 |     |
| LBXCOR1   | -0.41424960 | 0.02166713 | -3.37539119 |     |
| FLJ46300  | -0.41412381 | 0.02166713 | -3.37415404 |     |
| ATP1B1    | 0.41416016  | 0.02166713 | 3.37451154  |     |
| ATP4A     | -0.41441653 | 0.02166713 | -3.37703337 |     |
| PHAX      | 0.41439525  | 0.02166713 | 3.37682397  |     |
| SNIP1     | -0.41418079 | 0.02166713 | -3.37471440 |     |
| CUL4A     | 0.41421511  | 0.02166713 | 3.37505200  |     |
| WFIKKN1   | -0.41394241 | 0.02170747 | -3.37237033 |     |
| SERPINA3  | -0.41389804 | 0.02170747 | -3.37193414 | yes |
| BHLHE23   | -0.41396920 | 0.02170747 | -3.37263372 |     |
| C14orf119 | 0.41390778  | 0.02170747 | 3.37202986  |     |

|               |             |            |             |     |
|---------------|-------------|------------|-------------|-----|
| TSN           | 0.41392365  | 0.02170747 | 3.37218586  |     |
| DUSP27        | -0.41391812 | 0.02170747 | -3.37213154 |     |
| ZNF365        | -0.41366465 | 0.02171736 | -3.36964008 |     |
| C15orf2       | -0.41361701 | 0.02171736 | -3.36917191 |     |
| GUCY2D        | -0.41369061 | 0.02171736 | -3.36989525 |     |
| HTR5A         | -0.41376661 | 0.02171736 | -3.37064222 |     |
| FREM2         | 0.41366650  | 0.02171736 | 3.36965825  |     |
| FOLR4         | -0.41378875 | 0.02171736 | -3.37085976 |     |
| FLJ43752      | -0.41361282 | 0.02171736 | -3.36913073 |     |
| LOC401875     | -0.41382142 | 0.02171736 | -3.37118088 |     |
| SLC17A7       | -0.41364891 | 0.02171736 | -3.36948544 | yes |
| TBX1          | -0.41361991 | 0.02171736 | -3.36920043 |     |
| LOC151174     | -0.41358133 | 0.02172031 | -3.36882134 |     |
| NDUFS3        | 0.41355410  | 0.02172055 | 3.36855379  |     |
| RALYL         | -0.41351907 | 0.02172235 | -3.36820960 |     |
| GDF6          | -0.41349763 | 0.02172235 | -3.36799891 |     |
| RNF114        | 0.41346401  | 0.02172672 | 3.36766863  |     |
| ILDR1         | 0.41342823  | 0.02173023 | 3.36731712  |     |
| C14orf101     | 0.41340498  | 0.02173023 | 3.36708871  |     |
| SHE           | -0.41331041 | 0.02177372 | -3.36615974 |     |
| KIAA1919      | 0.41320891  | 0.02182174 | 3.36516285  |     |
| ADAD2         | -0.41309730 | 0.02183980 | -3.36406678 | yes |
| RARS2         | 0.41314941  | 0.02183980 | 3.36457849  |     |
| SLC17A1       | -0.41308661 | 0.02183980 | -3.36396186 |     |
| VDAC3         | 0.41304742  | 0.02183980 | 3.36357704  | yes |
| VASH2         | -0.41305665 | 0.02183980 | -3.36366765 |     |
| CACNA2D2      | -0.41300117 | 0.02185242 | -3.36312297 |     |
| GAL           | -0.41294366 | 0.02186930 | -3.36255835 |     |
| TMPRSS5       | -0.41292175 | 0.02186930 | -3.36234328 |     |
| NHLH1         | -0.41289363 | 0.02187029 | -3.36206728 |     |
| NES           | -0.41283204 | 0.02189285 | -3.36146269 | yes |
| SNORD116-29   | -0.41272578 | 0.02191326 | -3.36041980 |     |
| ANKRD2        | -0.41272981 | 0.02191326 | -3.36045938 |     |
| RGS6          | -0.41272080 | 0.02191326 | -3.36037097 |     |
| MYL9          | -0.41266007 | 0.02193349 | -3.35977498 |     |
| SEL1L2        | -0.41263648 | 0.02193349 | -3.35954349 |     |
| RAMP1         | -0.41260567 | 0.02193630 | -3.35924117 | yes |
| DKFZp564N2472 | -0.41252457 | 0.02195453 | -3.35844546 |     |
| IFNAR1        | 0.41254468  | 0.02195453 | 3.35864279  |     |
| ASCL4         | -0.41239676 | 0.02196893 | -3.35719173 |     |
| SIRPD         | -0.41240164 | 0.02196893 | -3.35723958 |     |
| AMTN          | -0.41244279 | 0.02196893 | -3.35764324 |     |
| TLN2          | -0.41240706 | 0.02196893 | -3.35729278 | yes |
| GPHB5         | -0.41232207 | 0.02199345 | -3.35645914 |     |
| CELSR3        | -0.41230617 | 0.02199345 | -3.35630315 |     |
| ABI1          | 0.41224386  | 0.02199917 | 3.35569208  | yes |
| SC4MOL        | 0.41221848  | 0.02199917 | 3.35544317  |     |
| SPTB          | -0.41221894 | 0.02199917 | -3.35544771 | yes |
| GPT           | -0.41206124 | 0.02208396 | -3.35390145 |     |
| COG5          | 0.41200663  | 0.02209171 | 3.35336607  |     |

|              |             |            |             |     |
|--------------|-------------|------------|-------------|-----|
| GYPB         | -0.41199683 | 0.02209171 | -3.35327000 |     |
| UROS         | 0.41196653  | 0.02209437 | 3.35297297  |     |
| NTRK2        | -0.41190688 | 0.02211608 | -3.35238831 |     |
| LRRC8B       | 0.41187385  | 0.02212054 | 3.35206459  | yes |
| ATP6AP2      | 0.41182098  | 0.02213789 | 3.35154640  |     |
| FAM47A       | -0.41165454 | 0.02219516 | -3.34991534 |     |
| GDF2         | -0.41165820 | 0.02219516 | -3.34995127 |     |
| LIPA         | 0.41170625  | 0.02219516 | 3.35042206  |     |
| FBRSL1       | -0.41162825 | 0.02219529 | -3.34965782 | yes |
| LOC100130557 | -0.41153374 | 0.02220713 | -3.34873185 |     |
| LOC390282    | -0.41152131 | 0.02220713 | -3.34861011 |     |
| NEUROD1      | -0.41152268 | 0.02220713 | -3.34862354 |     |
| ACN9         | 0.41150043  | 0.02220713 | 3.34840553  |     |
| SALL2        | -0.41147990 | 0.02220713 | -3.34820448 |     |
| ETF1         | 0.41144306  | 0.02221420 | 3.34784361  |     |
| TUBGCP3      | 0.41133746  | 0.02224762 | 3.34680937  |     |
| KCNK15       | -0.41131391 | 0.02224762 | -3.34657867 |     |
| ADAM17       | 0.41132626  | 0.02224762 | 3.34669970  |     |
| PHOX2A       | -0.41127506 | 0.02225164 | -3.34619828 |     |
| MGC50273     | -0.41125591 | 0.02225164 | -3.34601076 |     |
| SCAND3       | -0.41108319 | 0.02228548 | -3.34431966 |     |
| TRIM71       | -0.41110109 | 0.02228548 | -3.34449484 |     |
| KLHL34       | -0.41107479 | 0.02228548 | -3.34423744 | yes |
| CHMP2B       | 0.41114431  | 0.02228548 | 3.34491800  | yes |
| ASCL5        | -0.41111722 | 0.02228548 | -3.34465283 |     |
| CCDC85A      | -0.41090314 | 0.02230908 | -3.34255719 |     |
| OR52E2       | -0.41100267 | 0.02230908 | -3.34353143 |     |
| OR52J3       | -0.41093376 | 0.02230908 | -3.34285690 |     |
| PDHA2        | -0.41088410 | 0.02230908 | -3.34237083 |     |
| SOX2         | 0.41089080  | 0.02230908 | 3.34243648  |     |
| OLFM2        | -0.41092568 | 0.02230908 | -3.34277779 |     |
| FIGN         | -0.41084407 | 0.02231843 | -3.34197916 |     |
| P2RX3        | -0.41078491 | 0.02234030 | -3.34140019 |     |
| PRKAG3       | -0.41071897 | 0.02234986 | -3.34075493 |     |
| ADAMTSL2     | -0.41072518 | 0.02234986 | -3.34081578 |     |
| LRRN2        | -0.41052510 | 0.02239872 | -3.33885832 |     |
| DLAT         | 0.41060782  | 0.02239872 | 3.33966748  | yes |
| RNF215       | -0.41041416 | 0.02239872 | -3.33777327 |     |
| IFNA8        | -0.41046070 | 0.02239872 | -3.33822838 |     |
| KRTAP26-1    | -0.41050077 | 0.02239872 | -3.33862036 |     |
| RGS7         | -0.41047585 | 0.02239872 | -3.33837658 |     |
| RPS6KA3      | 0.41054467  | 0.02239872 | 3.33904973  |     |
| TRIM46       | -0.41043728 | 0.02239872 | -3.33799932 |     |
| RNF34        | 0.41050413  | 0.02239872 | 3.33865322  |     |
| NUPL2        | 0.41033838  | 0.02240438 | 3.33703219  |     |
| ASB13        | 0.41032910  | 0.02240438 | 3.33694145  |     |
| MIXL1        | -0.41037251 | 0.02240438 | -3.33736587 |     |
| APC2         | -0.40993939 | 0.02248132 | -3.33313156 |     |
| UBE2E3       | -0.40992411 | 0.02248132 | -3.33298230 |     |
| DLL3         | -0.40989214 | 0.02248132 | -3.33266984 |     |

|          |             |            |             |     |
|----------|-------------|------------|-------------|-----|
| LDB3     | -0.40992214 | 0.02248132 | -3.33296300 |     |
| SCRG1    | -0.40988227 | 0.02248132 | -3.33257339 |     |
| LMTK3    | -0.40994353 | 0.02248132 | -3.33317210 |     |
| DPEP1    | -0.40996319 | 0.02248132 | -3.33336417 |     |
| PSD3     | 0.40993405  | 0.02248132 | 3.33307942  | yes |
| IRX4     | -0.41006310 | 0.02248132 | -3.33434078 |     |
| UBR7     | 0.41000556  | 0.02248132 | 3.33377837  |     |
| CXCL5    | -0.40989756 | 0.02248132 | -3.33272285 |     |
| TAF7     | 0.40996465  | 0.02248132 | 3.33337845  |     |
| CCK      | -0.40994030 | 0.02248132 | -3.33314052 |     |
| MYBPH    | -0.40985681 | 0.02248148 | -3.33232461 |     |
| FOXP4    | -0.40977865 | 0.02250798 | -3.33156085 |     |
| COCH     | -0.40970545 | 0.02250798 | -3.33084566 |     |
| MYH15    | -0.40963174 | 0.02250798 | -3.33012561 |     |
| NALCN    | -0.40969947 | 0.02250798 | -3.33078723 |     |
| MAP3K10  | -0.40967033 | 0.02250798 | -3.33050253 |     |
| HCFC1R1  | -0.40973260 | 0.02250798 | -3.33111089 |     |
| TRPM8    | -0.40961519 | 0.02250798 | -3.32996390 |     |
| ZNF239   | -0.40963888 | 0.02250798 | -3.33019532 |     |
| HPD      | -0.40954450 | 0.02253791 | -3.32927344 |     |
| MRPL44   | 0.40951899  | 0.02253821 | 3.32902420  |     |
| RNF157   | -0.40918585 | 0.02254397 | -3.32577117 |     |
| GALNTL2  | -0.40928626 | 0.02254397 | -3.32675157 |     |
| C16orf63 | 0.40920395  | 0.02254397 | 3.32594788  |     |
| HFE2     | -0.40932350 | 0.02254397 | -3.32711519 |     |
| EPO      | -0.40920832 | 0.02254397 | -3.32599061 |     |
| AGFG2    | -0.40939256 | 0.02254397 | -3.32778945 |     |
| SLC10A5  | 0.40938025  | 0.02254397 | 3.32766929  |     |
| ATOH1    | -0.40939277 | 0.02254397 | -3.32779156 |     |
| C21orf91 | 0.40926879  | 0.02254397 | 3.32658094  |     |
| PRHOXNB  | -0.40927033 | 0.02254397 | -3.32659598 |     |
| SLC22A1  | -0.40923122 | 0.02254397 | -3.32621416 |     |
| PPP1R3F  | -0.40931746 | 0.02254397 | -3.32705612 |     |
| TM4SF5   | -0.40936776 | 0.02254397 | -3.32754732 |     |
| ASTE1    | 0.40914933  | 0.02255163 | 3.32541475  |     |
| KLK2     | -0.40910527 | 0.02256346 | -3.32498467 |     |
| POU4F1   | -0.40908168 | 0.02256346 | -3.32475433 |     |
| ARSF     | -0.40896570 | 0.02260708 | -3.32362240 |     |
| C4orf35  | -0.40896766 | 0.02260708 | -3.32364150 |     |
| UBE3C    | 0.40889244  | 0.02263898 | 3.32290750  |     |
| SLC9A8   | 0.40880242  | 0.02264939 | 3.32202908  |     |
| PANK1    | -0.40880396 | 0.02264939 | -3.32204416 |     |
| SFRP1    | -0.40882339 | 0.02264939 | -3.32223374 |     |
| TGM7     | -0.40874414 | 0.02265523 | -3.32146052 |     |
| SCN1B    | -0.40876225 | 0.02265523 | -3.32163718 |     |
| SMOC1    | -0.40869033 | 0.02267442 | -3.32093556 |     |
| CCT8     | 0.40846952  | 0.02269149 | 3.31878183  |     |
| CHRM1    | -0.40851492 | 0.02269149 | -3.31922464 |     |
| C20orf94 | 0.40861975  | 0.02269149 | 3.32024704  |     |
| C11orf40 | -0.40836950 | 0.02269149 | -3.31780654 |     |

|           |             |            |             |     |
|-----------|-------------|------------|-------------|-----|
| MAGEB6    | -0.40843086 | 0.02269149 | -3.31840484 |     |
| ARX       | -0.40843478 | 0.02269149 | -3.31844315 |     |
| SLC4A1AP  | 0.40857231  | 0.02269149 | 3.31978437  |     |
| TMEM2     | 0.40840685  | 0.02269149 | 3.31817075  |     |
| C1orf144  | 0.40856350  | 0.02269149 | 3.31969846  |     |
| NPBWR2    | -0.40841082 | 0.02269149 | -3.31820942 |     |
| ITIH4     | -0.40837903 | 0.02269149 | -3.31789943 |     |
| MPV17     | 0.40848745  | 0.02269149 | 3.31895671  |     |
| PROCR     | -0.40829547 | 0.02272415 | -3.31708472 |     |
| MTPN      | 0.40820434  | 0.02275200 | 3.31619635  |     |
| SYCN      | -0.40822476 | 0.02275200 | -3.31639542 |     |
| LGALS3    | 0.40815363  | 0.02276935 | 3.31570203  | yes |
| DIRC1     | -0.40812476 | 0.02277229 | -3.31542063 |     |
| GOSR1     | 0.40808020  | 0.02278561 | 3.31498630  |     |
| ARL6IP1   | 0.40795631  | 0.02279940 | 3.31377891  |     |
| PPCS      | 0.40802426  | 0.02279940 | 3.31444112  |     |
| ABHD1     | -0.40794005 | 0.02279940 | -3.31362050 |     |
| VAPA      | 0.40793751  | 0.02279940 | 3.31359572  | yes |
| CER1      | -0.40799481 | 0.02279940 | -3.31415406 |     |
| HES4      | -0.40790742 | 0.02280159 | -3.31330252 |     |
| NT5C1A    | -0.40788558 | 0.02280159 | -3.31308970 |     |
| TTYH1     | -0.40784988 | 0.02280913 | -3.31274191 | yes |
| ARPC4     | 0.40779106  | 0.02281593 | 3.31216884  |     |
| SEP4      | -0.40781056 | 0.02281593 | -3.31235882 | yes |
| DAD1      | 0.40772226  | 0.02284541 | 3.31149856  |     |
| SIVA1     | -0.40694423 | 0.02284680 | -3.30392390 |     |
| PNMA2     | -0.40692129 | 0.02284680 | -3.30370069 |     |
| SUB1      | 0.40749303  | 0.02284680 | 3.30926596  |     |
| CHRNB4    | -0.40715441 | 0.02284680 | -3.30596932 |     |
| PKD1L2    | -0.40756716 | 0.02284680 | -3.30998788 |     |
| COL11A2   | -0.40674338 | 0.02284680 | -3.30196979 |     |
| OSR1      | -0.40718329 | 0.02284680 | -3.30625036 |     |
| XKR3      | -0.40735861 | 0.02284680 | -3.30795712 |     |
| PYDC2     | -0.40692126 | 0.02284680 | -3.30370036 |     |
| LOC153328 | -0.40686703 | 0.02284680 | -3.30317269 |     |
| UNQ9391   | -0.40745660 | 0.02284680 | -3.30891120 |     |
| P2RX2     | -0.40670016 | 0.02284680 | -3.30154942 |     |
| SLC16A8   | -0.40728007 | 0.02284680 | -3.30719249 |     |
| BRI3      | -0.40751420 | 0.02284680 | -3.30947215 |     |
| LATS2     | -0.40675433 | 0.02284680 | -3.30207636 |     |
| GNAT1     | -0.40758376 | 0.02284680 | -3.31014951 |     |
| SUMF1     | 0.40673315  | 0.02284680 | 3.30187036  |     |
| CD200R1L  | -0.40728846 | 0.02284680 | -3.30727414 |     |
| FAM101B   | -0.40714902 | 0.02284680 | -3.30591681 | yes |
| YJEFN3    | -0.40683798 | 0.02284680 | -3.30289012 |     |
| KIF3C     | -0.40716985 | 0.02284680 | -3.30611952 |     |
| C17orf82  | -0.40698113 | 0.02284680 | -3.30428292 |     |
| NEFL      | -0.40676928 | 0.02284680 | -3.30222174 |     |
| OTX2      | -0.40720963 | 0.02284680 | -3.30650672 |     |
| C21orf45  | 0.40752908  | 0.02284680 | 3.30961705  |     |



|              |             |            |             |     |
|--------------|-------------|------------|-------------|-----|
| FLJ10404     | -0.40729555 | 0.02284680 | -3.30734314 | yes |
| PPM1B        | 0.40670580  | 0.02284680 | 3.30160431  |     |
| MRPS10       | 0.40675755  | 0.02284680 | 3.30210764  | yes |
| PAK7         | -0.40727679 | 0.02284680 | -3.30716052 |     |
| KCNT1        | -0.40733297 | 0.02284680 | -3.30770749 |     |
| NKX2-4       | -0.40712422 | 0.02284680 | -3.30567547 |     |
| SLC4A3       | -0.40679788 | 0.02284680 | -3.30249995 |     |
| TCEB1        | 0.40695542  | 0.02284680 | 3.30403270  |     |
| UBE2A        | 0.40669168  | 0.02284680 | 3.30146693  |     |
| RAB7A        | 0.40738241  | 0.02284680 | 3.30818883  |     |
| YIPF5        | 0.40699362  | 0.02284680 | 3.30440445  |     |
| SLCO5A1      | -0.40709473 | 0.02284680 | -3.30538839 |     |
| OR1A1        | -0.40739972 | 0.02284680 | -3.30835731 |     |
| NEURL3       | -0.40712473 | 0.02284680 | -3.30568035 |     |
| CNOT8        | 0.40719968  | 0.02284680 | 3.30640986  |     |
| CLINT1       | 0.40691182  | 0.02284680 | 3.30360852  |     |
| KIAA0427     | -0.40673015 | 0.02284680 | -3.30184110 | yes |
| MFAP3L       | -0.40709188 | 0.02284680 | -3.30536070 |     |
| GCHFR        | -0.40663461 | 0.02286890 | -3.30091187 |     |
| PSMB11       | -0.40650753 | 0.02292173 | -3.29967598 |     |
| C7orf61      | -0.40651389 | 0.02292173 | -3.29973787 |     |
| LINS1        | 0.40647448  | 0.02292800 | 3.29935462  |     |
| PIWIL1       | -0.40640870 | 0.02295596 | -3.29871508 |     |
| ZNRF3        | -0.40637493 | 0.02296274 | -3.29838673 |     |
| VAX1         | -0.40634524 | 0.02296368 | -3.29809816 |     |
| MKRN2        | 0.40631673  | 0.02296368 | 3.29782095  |     |
| LCN10        | -0.40630298 | 0.02296368 | -3.29768730 | yes |
| LOC100133367 | -0.40609072 | 0.02296726 | -3.29562420 |     |
| DNM1L        | 0.40604871  | 0.02296726 | 3.29521591  |     |
| CDO1         | -0.40581774 | 0.02296726 | -3.29297191 |     |
| CHRNA2       | -0.40576327 | 0.02296726 | -3.29244274 |     |
| FAM55A       | -0.40555318 | 0.02296726 | -3.29040239 |     |
| C7orf31      | -0.40577859 | 0.02296726 | -3.29259159 |     |
| CD300LG      | -0.40598524 | 0.02296726 | -3.29459923 |     |
| PATE1        | -0.40562317 | 0.02296726 | -3.29108203 |     |
| GRASP        | -0.40574518 | 0.02296726 | -3.29226708 | yes |
| DTX1         | -0.40568744 | 0.02296726 | -3.29170626 |     |
| FCN2         | -0.40565139 | 0.02296726 | -3.29135610 |     |
| KIAA0802     | -0.40585716 | 0.02296726 | -3.29335486 |     |
| STX12        | 0.40614142  | 0.02296726 | 3.29611696  |     |
| REXO2        | 0.40578394  | 0.02296726 | 3.29264356  |     |
| SULT1C4      | -0.40587651 | 0.02296726 | -3.29354278 |     |
| GRIK2        | 0.40579275  | 0.02296726 | 3.29272909  |     |
| HBQ1         | -0.40589665 | 0.02296726 | -3.29373851 |     |
| SMTNL2       | -0.40609333 | 0.02296726 | -3.29564957 |     |
| ZACN         | -0.40593565 | 0.02296726 | -3.29411734 |     |
| LPL          | -0.40616492 | 0.02296726 | -3.29634528 |     |
| CERCAM       | -0.40557606 | 0.02296726 | -3.29062455 |     |
| TBCCD1       | 0.40593046  | 0.02296726 | 3.29406698  |     |
| MRS2         | 0.40589200  | 0.02296726 | 3.29369333  |     |

|              |             |            |             |     |
|--------------|-------------|------------|-------------|-----|
| BAI1         | -0.40560742 | 0.02296726 | -3.29092913 |     |
| SCNN1D       | -0.40560576 | 0.02296726 | -3.29091302 |     |
| hCG_1757335  | 0.40615296  | 0.02296726 | 3.29622910  |     |
| ACTG1        | 0.40606740  | 0.02296726 | 3.29539762  |     |
| CALB1        | -0.40584870 | 0.02296726 | -3.29327266 |     |
| RPAIN        | 0.40623335  | 0.02296726 | 3.29701046  |     |
| LCOR         | 0.40556011  | 0.02296726 | 3.29046963  | yes |
| DYNLL1       | 0.40613276  | 0.02296726 | 3.29603273  |     |
| POLR1C       | 0.40569023  | 0.02296726 | 3.29173329  | yes |
| NDFIP2       | 0.40552250  | 0.02297231 | 3.29010451  |     |
| NOBOX        | -0.40549929 | 0.02297244 | -3.28987914 |     |
| TANK         | 0.40537908  | 0.02297595 | 3.28871198  |     |
| FBXL22       | -0.40538026 | 0.02297595 | -3.28872350 |     |
| LCE1D        | -0.40541298 | 0.02297595 | -3.28904107 |     |
| ARF4         | 0.40542255  | 0.02297595 | 3.28913405  |     |
| VGLL1        | -0.40545267 | 0.02297595 | -3.28942645 |     |
| CYGB         | -0.40526987 | 0.02299150 | -3.28765190 |     |
| GFAP         | -0.40529424 | 0.02299150 | -3.28788845 |     |
| IREB2        | 0.40529745  | 0.02299150 | 3.28791962  |     |
| HRH4         | -0.40526387 | 0.02299150 | -3.28759362 |     |
| LOC100129455 | -0.40510450 | 0.02302130 | -3.28604692 |     |
| CCNY         | 0.40513794  | 0.02302130 | 3.28637137  | yes |
| C5orf46      | -0.40512583 | 0.02302130 | -3.28625387 |     |
| COLEC11      | -0.40518101 | 0.02302130 | -3.28678941 |     |
| SAMD1        | -0.40515348 | 0.02302130 | -3.28652223 |     |
| PRKAR1B      | -0.40508092 | 0.02302180 | -3.28581810 |     |
| PARP1        | 0.40502254  | 0.02302684 | 3.28525160  |     |
| SNCG         | -0.40500491 | 0.02302684 | -3.28508056 |     |
| RILP         | -0.40504010 | 0.02302684 | -3.28542194 |     |
| PHF21B       | -0.40484142 | 0.02306484 | -3.28349440 |     |
| TMCO2        | -0.40486251 | 0.02306484 | -3.28369899 |     |
| NCAN         | -0.40483378 | 0.02306484 | -3.28342032 |     |
| UBXN4        | 0.40490682  | 0.02306484 | 3.28412881  |     |
| OR51B6       | -0.40486021 | 0.02306484 | -3.28367670 |     |
| PLRG1        | 0.40478793  | 0.02307948 | 3.28297560  |     |
| STMN4        | -0.40476628 | 0.02307948 | -3.28276557 |     |
| MAPK8IP2     | -0.40465296 | 0.02309449 | -3.28166657 |     |
| C10orf28     | 0.40469689  | 0.02309449 | 3.28209253  |     |
| TMIGD1       | -0.40466484 | 0.02309449 | -3.28178173 |     |
| CORO6        | -0.40465796 | 0.02309449 | -3.28171504 |     |
| OR10H5       | -0.40457317 | 0.02313241 | -3.28089281 |     |
| CHD5         | -0.40447194 | 0.02316960 | -3.27991129 |     |
| CACNG1       | -0.40448375 | 0.02316960 | -3.28002573 |     |
| POLR3C       | 0.40441196  | 0.02317943 | 3.27932981  | yes |
| MNAT1        | 0.40442993  | 0.02317943 | 3.27950402  |     |
| PRAMEF11     | -0.40433467 | 0.02321582 | -3.27858053 |     |
| TCP1         | 0.40423882  | 0.02326465 | 3.27765147  |     |
| MYLPF        | -0.40410764 | 0.02333557 | -3.27638022 |     |
| LOC729040    | -0.40408750 | 0.02333557 | -3.27618510 |     |
| CHRM5        | -0.40406463 | 0.02333579 | -3.27596344 |     |

|               |             |            |             |     |
|---------------|-------------|------------|-------------|-----|
| LOC389458     | -0.40397879 | 0.02337815 | -3.27513176 |     |
| EBF3          | -0.40393588 | 0.02339181 | -3.27471610 | yes |
| OR51M1        | -0.40388360 | 0.02341176 | -3.27420965 |     |
| GTF2B         | 0.40380027  | 0.02342137 | 3.27340243  |     |
| ITIH2         | -0.40382926 | 0.02342137 | -3.27368322 |     |
| HES5          | -0.40375692 | 0.02342137 | -3.27298253 |     |
| C4orf49       | -0.40376457 | 0.02342137 | -3.27305670 |     |
| ZNF697        | -0.40378985 | 0.02342137 | -3.27330149 |     |
| FAM59B        | -0.40369481 | 0.02342460 | -3.27238101 |     |
| EDA           | -0.40366244 | 0.02342460 | -3.27206758 | yes |
| GPR32         | -0.40367500 | 0.02342460 | -3.27218918 |     |
| PLEKHF2       | 0.40369288  | 0.02342460 | 3.27236240  |     |
| TPPP2         | -0.40361918 | 0.02343860 | -3.27164862 |     |
| DHRS9         | 0.40350434  | 0.02344784 | 3.27053675  | yes |
| CKM           | -0.40353023 | 0.02344784 | -3.27078739 |     |
| KCNE1L        | -0.40351914 | 0.02344784 | -3.27068001 |     |
| STH           | -0.40347869 | 0.02344784 | -3.27028839 |     |
| PYDC1         | -0.40346522 | 0.02344784 | -3.27015801 |     |
| OR1L3         | -0.40344907 | 0.02344784 | -3.27000167 |     |
| MT3           | -0.40353832 | 0.02344784 | -3.27086573 |     |
| C15orf37      | -0.40337764 | 0.02347249 | -3.26931016 |     |
| VCPIP1        | 0.40336777  | 0.02347249 | 3.26921465  |     |
| FAM70B        | -0.40330836 | 0.02348249 | -3.26863961 | yes |
| HDHD2         | 0.40332773  | 0.02348249 | 3.26882710  |     |
| KLF14         | -0.40316456 | 0.02353431 | -3.26724791 |     |
| OR10A4        | -0.40317176 | 0.02353431 | -3.26731761 |     |
| C3orf36       | -0.40318263 | 0.02353431 | -3.26742273 |     |
| CPLX2         | -0.40308463 | 0.02354647 | -3.26647450 |     |
| SLFN5         | 0.40306515  | 0.02354647 | 3.26628599  |     |
| HOXD3         | -0.40302452 | 0.02354647 | -3.26589291 |     |
| LOC647597     | -0.40309591 | 0.02354647 | -3.26658366 |     |
| FAM96A        | 0.40303094  | 0.02354647 | 3.26595501  |     |
| CBS           | -0.40301345 | 0.02354647 | -3.26578576 |     |
| SSBP1         | 0.40290039  | 0.02360767 | 3.26469208  |     |
| ZNF629        | -0.40272680 | 0.02370995 | -3.26301311 |     |
| HIPK4         | -0.40269683 | 0.02371526 | -3.26272325 |     |
| RP11-265F14.2 | -0.40264264 | 0.02372202 | -3.26219925 |     |
| ACTL6A        | 0.40264601  | 0.02372202 | 3.26223186  |     |
| C9orf40       | -0.40258876 | 0.02374354 | -3.26167828 |     |
| MRGPRX4       | -0.40251623 | 0.02376278 | -3.26097697 |     |
| GPR22         | -0.40252828 | 0.02376278 | -3.26109352 |     |
| AMZ1          | -0.40239678 | 0.02377936 | -3.25982231 |     |
| AZU1          | -0.40238666 | 0.02377936 | -3.25972450 |     |
| CYP26B1       | -0.40242519 | 0.02377936 | -3.26009692 |     |
| ZC3HAV1       | 0.40241329  | 0.02377936 | 3.25998192  |     |
| GAL3ST1       | -0.40238163 | 0.02377936 | -3.25967580 |     |
| SPRED3        | -0.40226284 | 0.02384221 | -3.25852769 |     |
| LOC653808     | -0.40224503 | 0.02384221 | -3.25835558 |     |
| WDR86         | -0.40217034 | 0.02384525 | -3.25763387 |     |
| KCNJ5         | -0.40217147 | 0.02384525 | -3.25764473 |     |

|              |             |            |             |     |
|--------------|-------------|------------|-------------|-----|
| POU3F2       | -0.40215273 | 0.02384525 | -3.25746368 |     |
| FAM58A       | -0.40221453 | 0.02384525 | -3.25806089 |     |
| ACTR2        | 0.40190596  | 0.02385763 | 3.25507963  |     |
| TRIM13       | 0.40174922  | 0.02385763 | 3.25356579  |     |
| TIMM17A      | 0.40167980  | 0.02385763 | 3.25289541  |     |
| LOC145814    | -0.40195606 | 0.02385763 | -3.25556356 |     |
| AP2B1        | 0.40171646  | 0.02385763 | 3.25324938  |     |
| MRPS27       | 0.40194889  | 0.02385763 | 3.25549424  |     |
| OR7C1        | -0.40187808 | 0.02385763 | -3.25481032 |     |
| FAM71E2      | -0.40204160 | 0.02385763 | -3.25638996 |     |
| TMPRSS9      | -0.40208708 | 0.02385763 | -3.25682936 |     |
| METTL10      | 0.40171606  | 0.02385763 | 3.25324550  |     |
| MED31        | 0.40184313  | 0.02385763 | 3.25447270  |     |
| OSGEP        | 0.40179574  | 0.02385763 | 3.25401506  |     |
| TMEM184C     | 0.40182244  | 0.02385763 | 3.25427291  |     |
| FNDC4        | -0.40177200 | 0.02385763 | -3.25378576 |     |
| SNX2         | 0.40191242  | 0.02385763 | 3.25514201  |     |
| ZIC2         | -0.40170156 | 0.02385763 | -3.25310547 |     |
| ATG10        | 0.40173062  | 0.02385763 | 3.25338617  |     |
| CUL2         | 0.40194104  | 0.02385763 | 3.25541848  |     |
| ATAD1        | 0.40167664  | 0.02385763 | 3.25286492  |     |
| ZBTB47       | -0.40200844 | 0.02385763 | -3.25606960 |     |
| PAGE4        | -0.40208175 | 0.02385763 | -3.25677781 |     |
| BBC3         | -0.40163175 | 0.02386104 | -3.25243147 |     |
| ZNF843       | -0.40162828 | 0.02386104 | -3.25239796 |     |
| GPRIN1       | -0.40151274 | 0.02387846 | -3.25128243 |     |
| ABRA         | -0.40146159 | 0.02387846 | -3.25078865 |     |
| DIS3         | 0.40146677  | 0.02387846 | 3.25083863  |     |
| ARL2BP       | 0.40145132  | 0.02387846 | 3.25068953  |     |
| KRT26        | -0.40145699 | 0.02387846 | -3.25074419 |     |
| NUP88        | 0.40150767  | 0.02387846 | 3.25123346  |     |
| THEG         | -0.40156397 | 0.02387846 | -3.25177702 |     |
| CNTFR        | -0.40138149 | 0.02391124 | -3.25001546 |     |
| BAIAP2L2     | -0.40131218 | 0.02394370 | -3.24934649 |     |
| C5orf28      | 0.40127866  | 0.02395185 | 3.24902297  |     |
| GPR64        | -0.40122696 | 0.02395772 | -3.24852406 |     |
| DAB2IP       | -0.40124283 | 0.02395772 | -3.24867724 |     |
| ASCC3        | 0.40119344  | 0.02396106 | 3.24820063  |     |
| HAPLN4       | -0.40117903 | 0.02396106 | -3.24806155 |     |
| RC3H1        | 0.40112898  | 0.02397222 | 3.24757861  | yes |
| GNAO1        | -0.40109819 | 0.02397222 | -3.24728155 | yes |
| LOC100133431 | -0.40111832 | 0.02397222 | -3.24747579 |     |
| CPNE6        | -0.40102647 | 0.02400645 | -3.24658966 |     |
| NANOS1       | -0.40095627 | 0.02403969 | -3.24591246 |     |
| PDZD8        | 0.40088947  | 0.02404775 | 3.24526811  |     |
| HOXC11       | -0.40088587 | 0.02404775 | -3.24523343 |     |
| MEF2B        | -0.40088016 | 0.02404775 | -3.24517826 |     |
| C20orf123    | -0.40083644 | 0.02406298 | -3.24475663 |     |
| hCG_1659830  | -0.40076161 | 0.02409948 | -3.24403494 |     |
| SCUBE2       | -0.40073993 | 0.02409968 | -3.24382588 |     |

|             |             |            |             |     |
|-------------|-------------|------------|-------------|-----|
| TNP1        | -0.40070191 | 0.02411105 | -3.24345932 |     |
| ZNF296      | -0.40049215 | 0.02415957 | -3.24143690 |     |
| GALR1       | -0.40048166 | 0.02415957 | -3.24133577 |     |
| GHSR        | -0.40050684 | 0.02415957 | -3.24157850 |     |
| XKRX        | 0.40059598  | 0.02415957 | 3.24243786  |     |
| NRD1        | 0.40048365  | 0.02415957 | 3.24135503  |     |
| QRSL1       | 0.40049972  | 0.02415957 | 3.24150986  | yes |
| SPINK1      | -0.40052089 | 0.02415957 | -3.24171397 |     |
| GBX2        | -0.40032519 | 0.02424800 | -3.23982768 |     |
| MAGEB3      | -0.40031012 | 0.02424800 | -3.23968239 |     |
| INSM1       | -0.40021778 | 0.02429195 | -3.23879263 |     |
| PSMD13      | 0.40020362  | 0.02429195 | 3.23865615  |     |
| PUM2        | 0.40015599  | 0.02431009 | 3.23819720  |     |
| KCND1       | -0.40009957 | 0.02431968 | -3.23765358 |     |
| ATF1        | 0.40011286  | 0.02431968 | 3.23778163  |     |
| SPAG4L      | -0.39996741 | 0.02437322 | -3.23638046 |     |
| C14orf178   | -0.39999067 | 0.02437322 | -3.23660452 |     |
| CAPN2       | 0.39995821  | 0.02437322 | 3.23629178  |     |
| CCDC105     | -0.39990273 | 0.02439189 | -3.23575744 |     |
| VWA5B1      | -0.39986662 | 0.02439189 | -3.23540967 |     |
| XIRP2       | -0.39985659 | 0.02439189 | -3.23531304 |     |
| SLC35A5     | 0.39984641  | 0.02439189 | 3.23521503  |     |
| FLJ40292    | -0.39981892 | 0.02439627 | -3.23495026 |     |
| PRX         | -0.39979266 | 0.02439980 | -3.23469732 |     |
| GHITM       | 0.39975903  | 0.02440842 | 3.23437352  |     |
| SNORD115-38 | -0.39938754 | 0.02442390 | -3.23079715 |     |
| C20orf144   | -0.39961999 | 0.02442390 | -3.23303468 |     |
| CRP         | -0.39937904 | 0.02442390 | -3.23071535 |     |
| FAM119A     | 0.39940033  | 0.02442390 | 3.23092024  |     |
| DAND5       | -0.39946862 | 0.02442390 | -3.23157749 |     |
| C1orf43     | 0.39945679  | 0.02442390 | 3.23146368  |     |
| OR1L1       | -0.39966656 | 0.02442390 | -3.23348309 |     |
| HOXA13      | -0.39948840 | 0.02442390 | -3.23176797 |     |
| KCNJ1       | -0.39944585 | 0.02442390 | -3.23135834 |     |
| ROR1        | -0.39962466 | 0.02442390 | -3.23307970 |     |
| TMEM138     | 0.39940430  | 0.02442390 | 3.23095846  |     |
| PLIN        | -0.39945107 | 0.02442390 | -3.23140856 |     |
| PROP1       | -0.39947707 | 0.02442390 | -3.23165888 |     |
| RPS9        | -0.39965489 | 0.02442390 | -3.23337079 |     |
| LOC642648   | -0.39951329 | 0.02442390 | -3.23200747 |     |
| RPL36P8     | -0.39954120 | 0.02442390 | -3.23227619 |     |
| LOC643332   | -0.39938770 | 0.02442390 | -3.23079867 |     |
| SSX8        | -0.39935567 | 0.02442558 | -3.23049034 |     |
| LCMT1       | 0.39930818  | 0.02444285 | 3.23003333  |     |
| RNF2        | 0.39928329  | 0.02444285 | 3.22979386  | yes |
| PGLYRP1     | -0.39926789 | 0.02444285 | -3.22964567 |     |
| KRT33B      | -0.39918711 | 0.02448421 | -3.22886833 |     |
| SERPINA10   | -0.39910129 | 0.02448864 | -3.22804262 |     |
| SOX11       | -0.39910337 | 0.02448864 | -3.22806260 |     |
| CASR        | -0.39912665 | 0.02448864 | -3.22828661 |     |

|              |             |            |             |     |
|--------------|-------------|------------|-------------|-----|
| TBPL1        | 0.39909723  | 0.02448864 | 3.22800358  |     |
| ABCC12       | -0.39907534 | 0.02448937 | -3.22779301 |     |
| PCP2         | -0.39901499 | 0.02450229 | -3.22721241 | yes |
| ZNF774       | -0.39901860 | 0.02450229 | -3.22724718 |     |
| C16orf82     | -0.39899088 | 0.02450457 | -3.22698054 |     |
| SLC28A1      | -0.39896460 | 0.02450836 | -3.22672769 |     |
| SATL1        | -0.39889212 | 0.02453097 | -3.22603061 |     |
| LOC645877    | -0.39889034 | 0.02453097 | -3.22601346 |     |
| TBX10        | -0.39884346 | 0.02453467 | -3.22556263 |     |
| NCRNA00114   | -0.39885173 | 0.02453467 | -3.22564209 |     |
| LYPD6B       | 0.39880246  | 0.02454220 | 3.22516827  |     |
| SUMO1P1      | -0.39878409 | 0.02454220 | -3.22499160 |     |
| RPE          | 0.39877037  | 0.02454220 | 3.22485973  |     |
| GPR88        | -0.39870856 | 0.02457065 | -3.22426537 |     |
| CLDN19       | -0.39866344 | 0.02457191 | -3.22383153 |     |
| SNORA80      | -0.39864464 | 0.02457191 | -3.22365079 |     |
| STC1         | -0.39865328 | 0.02457191 | -3.22373386 |     |
| DULLARD      | -0.39858780 | 0.02459207 | -3.22310430 |     |
| ACTN3        | -0.39857420 | 0.02459207 | -3.22297358 |     |
| HOXD1        | -0.39850794 | 0.02460546 | -3.22233663 |     |
| SLC35F4      | -0.39847694 | 0.02460546 | -3.22203861 |     |
| KCNJ8        | -0.39850087 | 0.02460546 | -3.22226862 |     |
| SNHG3-RCC1   | 0.39847231  | 0.02460546 | 3.22199415  |     |
| HAPLN2       | -0.39844117 | 0.02461276 | -3.22169481 |     |
| B3GNT8       | -0.39841283 | 0.02461812 | -3.22142247 |     |
| ADAM5P       | -0.39832279 | 0.02466630 | -3.22055708 |     |
| EID2         | -0.39829731 | 0.02466970 | -3.22031221 |     |
| LOC100131664 | -0.39807678 | 0.02477425 | -3.21819334 |     |
| PLEKHG4B     | -0.39804421 | 0.02477425 | -3.21788047 |     |
| TUBB2B       | -0.39809045 | 0.02477425 | -3.21832470 | yes |
| NDUFA5       | 0.39812157  | 0.02477425 | 3.21862360  |     |
| RPL18        | 0.39805303  | 0.02477425 | 3.21796521  |     |
| OSBPL3       | 0.39793749  | 0.02477715 | 3.21685533  | yes |
| C12orf61     | -0.39801713 | 0.02477715 | -3.21762036 |     |
| LOC389151    | -0.39794756 | 0.02477715 | -3.21695207 |     |
| RPL26P12     | -0.39797981 | 0.02477715 | -3.21726182 |     |
| SOHLH1       | -0.39795952 | 0.02477715 | -3.21706698 |     |
| HOXD13       | -0.39790577 | 0.02478048 | -3.21655070 |     |
| MYBPC3       | -0.39789175 | 0.02478048 | -3.21641600 |     |
| HOXB5        | -0.39784462 | 0.02479907 | -3.21596342 |     |
| LOC100133364 | -0.39764307 | 0.02483390 | -3.21402808 |     |
| KLF2         | -0.39751138 | 0.02483390 | -3.21276393 |     |
| TDRD10       | -0.39771264 | 0.02483390 | -3.21469608 |     |
| MAGEA13P     | -0.39759870 | 0.02483390 | -3.21360217 |     |
| FLJ23865     | -0.39750476 | 0.02483390 | -3.21270039 |     |
| ABC7         | 0.39748895  | 0.02483390 | 3.21254859  |     |
| OFCC1        | -0.39765724 | 0.02483390 | -3.21416410 |     |
| GP1BA        | -0.39753267 | 0.02483390 | -3.21296828 |     |
| GTPBP8       | 0.39763353  | 0.02483390 | 3.21393647  |     |
| HOXA9        | -0.39767939 | 0.02483390 | -3.21437678 |     |

|            |             |            |             |     |
|------------|-------------|------------|-------------|-----|
| NPY2R      | -0.39750421 | 0.02483390 | -3.21269504 |     |
| RASL12     | -0.39763175 | 0.02483390 | -3.21391939 | yes |
| RNF138     | 0.39760251  | 0.02483390 | 3.21363867  |     |
| RAD23B     | 0.39758761  | 0.02483390 | 3.21349566  |     |
| DNLZ       | -0.39772672 | 0.02483390 | -3.21483122 |     |
| IGLON5     | -0.39744338 | 0.02484255 | -3.21211118 |     |
| TMEM165    | 0.39743596  | 0.02484255 | 3.21204002  |     |
| NOG        | -0.39734427 | 0.02489240 | -3.21115999 |     |
| PAK2       | 0.39729551  | 0.02489815 | 3.21069206  |     |
| RIOK3      | 0.39730351  | 0.02489815 | 3.21076885  |     |
| NPW        | -0.39722544 | 0.02493298 | -3.21001968 |     |
| C17orf75   | 0.39716918  | 0.02495817 | 3.20947996  | yes |
| OTOS       | -0.39708860 | 0.02500045 | -3.20870686 |     |
| DNAJA2     | 0.39695910  | 0.02503971 | 3.20746465  |     |
| FAM101A    | -0.39679449 | 0.02503971 | -3.20588599 |     |
| HORMAD2    | -0.39698790 | 0.02503971 | -3.20774089 |     |
| CHST13     | -0.39661438 | 0.02503971 | -3.20415904 |     |
| PKD1L1     | -0.39669115 | 0.02503971 | -3.20489511 |     |
| EN1        | -0.39699575 | 0.02503971 | -3.20781617 |     |
| SLITRK5    | -0.39675848 | 0.02503971 | -3.20554067 |     |
| DKK4       | -0.39658982 | 0.02503971 | -3.20392366 |     |
| KSR2       | -0.39685745 | 0.02503971 | -3.20648972 |     |
| TREML4     | -0.39672819 | 0.02503971 | -3.20525028 |     |
| KRT73      | -0.39689646 | 0.02503971 | -3.20686384 |     |
| APOE       | -0.39660993 | 0.02503971 | -3.20411641 |     |
| IGFBP1     | -0.39692014 | 0.02503971 | -3.20709099 |     |
| SULT6B1    | -0.39677285 | 0.02503971 | -3.20567851 |     |
| OR2A2      | -0.39662316 | 0.02503971 | -3.20424322 |     |
| FAM82B     | 0.39670565  | 0.02503971 | 3.20503410  |     |
| SAGE1      | -0.39688318 | 0.02503971 | -3.20673651 |     |
| CSGALNACT1 | -0.39694132 | 0.02503971 | -3.20729411 |     |
| ZNF669     | 0.39662469  | 0.02503971 | 3.20425789  |     |
| SCRT1      | -0.39659194 | 0.02503971 | -3.20394399 |     |
| C19orf2    | 0.39677597  | 0.02503971 | 3.20570836  |     |
| PSMD6      | 0.39663599  | 0.02503971 | 3.20436629  |     |
| MESDC1     | -0.39650513 | 0.02508350 | -3.20311182 |     |
| CASP6      | 0.39648740  | 0.02508350 | 3.20294183  |     |
| PITX3      | -0.39645450 | 0.02508973 | -3.20262646 |     |
| PTCH2      | -0.39643855 | 0.02508973 | -3.20247363 |     |
| APLN       | -0.39640300 | 0.02510066 | -3.20213295 |     |
| PRAP1      | -0.39633386 | 0.02513523 | -3.20147030 |     |
| EAF1       | 0.39629718  | 0.02514699 | 3.20111880  |     |
| METTL5     | 0.39617746  | 0.02520319 | 3.19997168  | yes |
| SLC10A2    | -0.39619464 | 0.02520319 | -3.20013630 |     |
| TSPAN3     | 0.39613533  | 0.02520583 | 3.19956806  |     |
| RAB41      | -0.39613386 | 0.02520583 | -3.19955394 |     |
| MGC34800   | -0.39607379 | 0.02521346 | -3.19897855 |     |
| BZRPL1     | -0.39600681 | 0.02521346 | -3.19833693 |     |
| LOC284837  | -0.39609198 | 0.02521346 | -3.19915281 |     |
| KCNF1      | -0.39600367 | 0.02521346 | -3.19830682 |     |



|              |             |            |             |     |
|--------------|-------------|------------|-------------|-----|
| ENPP1        | -0.39601846 | 0.02521346 | -3.19844855 |     |
| KCNK13       | -0.39605801 | 0.02521346 | -3.19882736 |     |
| SLC25A34     | -0.39595271 | 0.02523538 | -3.19781874 |     |
| ELF1         | 0.39592258  | 0.02524264 | 3.19753015  | yes |
| C20orf165    | -0.39586821 | 0.02525300 | -3.19700945 |     |
| PPHLN1       | 0.39588290  | 0.02525300 | 3.19715017  |     |
| PDZRN4       | -0.39579994 | 0.02527185 | -3.19635568 |     |
| TMEM82       | -0.39579933 | 0.02527185 | -3.19634988 |     |
| CAPRIN1      | 0.39577954  | 0.02527185 | 3.19616031  |     |
| FEV          | -0.39574247 | 0.02527185 | -3.19580542 |     |
| PRB3         | -0.39574930 | 0.02527185 | -3.19587076 |     |
| FAM168A      | -0.39572025 | 0.02527358 | -3.19559261 |     |
| GPN1         | 0.39552710  | 0.02528032 | 3.19374355  |     |
| BCL6B        | -0.39558612 | 0.02528032 | -3.19430850 |     |
| C3orf56      | -0.39557260 | 0.02528032 | -3.19417905 |     |
| ANXA7        | 0.39566639  | 0.02528032 | 3.19507697  |     |
| C2orf53      | -0.39553911 | 0.02528032 | -3.19385850 |     |
| NFE2L2       | 0.39551346  | 0.02528032 | 3.19361299  |     |
| TRIM68       | 0.39567637  | 0.02528032 | 3.19517248  |     |
| KCMF1        | 0.39554725  | 0.02528032 | 3.19393638  |     |
| USH2A        | -0.39560863 | 0.02528032 | -3.19452401 |     |
| SPATA22      | -0.39558852 | 0.02528032 | -3.19433146 |     |
| hCG_2004198  | -0.39544845 | 0.02529041 | -3.19299071 |     |
| CHRNE        | -0.39544019 | 0.02529041 | -3.19291162 |     |
| PKHD1        | -0.39545956 | 0.02529041 | -3.19309702 |     |
| CASP12       | -0.39538817 | 0.02531326 | -3.19241376 |     |
| ZBTB12       | -0.39528822 | 0.02535720 | -3.19145733 |     |
| ATP2B3       | -0.39528674 | 0.02535720 | -3.19144314 |     |
| GLRA4        | -0.39523699 | 0.02536553 | -3.19096711 |     |
| VEGFB        | -0.39521612 | 0.02536553 | -3.19076742 |     |
| DCTN5        | 0.39523132  | 0.02536553 | 3.19091285  |     |
| TRIM38       | 0.39503300  | 0.02545362 | 3.18901561  |     |
| DAGLB        | 0.39505414  | 0.02545362 | 3.18921776  |     |
| POP5         | 0.39504487  | 0.02545362 | 3.18912913  |     |
| ERC2         | -0.39494472 | 0.02550240 | -3.18817117 |     |
| C10orf71     | -0.39490711 | 0.02551523 | -3.18781144 |     |
| AOC2         | -0.39482615 | 0.02555890 | -3.18703723 |     |
| LOC100130988 | -0.39468459 | 0.02557812 | -3.18568370 |     |
| AANAT        | -0.39468199 | 0.02557812 | -3.18565884 |     |
| PFDN2        | -0.39476883 | 0.02557812 | -3.18648911 |     |
| PPID         | 0.39468874  | 0.02557812 | 3.18572336  |     |
| GDF5         | -0.39472449 | 0.02557812 | -3.18606518 |     |
| C9orf140     | -0.39470013 | 0.02557812 | -3.18583224 |     |
| PTCRA        | -0.39462938 | 0.02558535 | -3.18515581 |     |
| SLC25A41     | -0.39459391 | 0.02558535 | -3.18481679 |     |
| ATP6V1C1     | 0.39460329  | 0.02558535 | 3.18490645  |     |
| THOC7        | 0.39461234  | 0.02558535 | 3.18499294  |     |
| CDH20        | -0.39451188 | 0.02562994 | -3.18403258 |     |
| LOC100131138 | -0.39421901 | 0.02563139 | -3.18123380 |     |
| CREB1        | 0.39423509  | 0.02563139 | 3.18138746  |     |

|          |             |            |             |     |
|----------|-------------|------------|-------------|-----|
| ADSL     | 0.39430557  | 0.02563139 | 3.18206087  |     |
| AFF2     | -0.39431229 | 0.02563139 | -3.18212508 |     |
| TPSD1    | -0.39434526 | 0.02563139 | -3.18244013 |     |
| OR2M4    | -0.39429046 | 0.02563139 | -3.18191655 |     |
| GTF2A1   | 0.39440723  | 0.02563139 | 3.18303238  |     |
| GJC3     | -0.39440740 | 0.02563139 | -3.18303398 |     |
| KIR2DS4  | -0.39426091 | 0.02563139 | -3.18163417 |     |
| ZNF580   | -0.39444879 | 0.02563139 | -3.18342963 |     |
| PDE6C    | -0.39424563 | 0.02563139 | -3.18148819 |     |
| PRODH2   | -0.39439860 | 0.02563139 | -3.18294996 |     |
| TMEM72   | -0.39442949 | 0.02563139 | -3.18324513 |     |
| CABLES2  | -0.39431799 | 0.02563139 | -3.18217960 |     |
| LPGAT1   | 0.39431881  | 0.02563139 | 3.18218743  |     |
| F11R     | 0.39418296  | 0.02564332 | 3.18088936  |     |
| ACTR6    | 0.39410850  | 0.02566889 | 3.18017802  |     |
| TTC35    | 0.39411493  | 0.02566889 | 3.18023946  |     |
| NRG3     | -0.39406115 | 0.02567453 | -3.17972571 |     |
| HMGCS1   | 0.39394653  | 0.02567453 | 3.17863084  |     |
| ASPDH    | -0.39394985 | 0.02567453 | -3.17866257 |     |
| SCT      | -0.39394783 | 0.02567453 | -3.17864331 |     |
| FAM57B   | -0.39405104 | 0.02567453 | -3.17962915 |     |
| DIRC2    | 0.39397785  | 0.02567453 | 3.17892999  |     |
| ZNF804A  | -0.39396843 | 0.02567453 | -3.17884004 |     |
| FBXO44   | -0.39403024 | 0.02567453 | -3.17943038 | yes |
| WDR68    | 0.39388964  | 0.02568770 | 3.17808750  |     |
| FLJ38576 | -0.39390369 | 0.02568770 | -3.17822175 |     |
| ITGB1BP3 | -0.39382252 | 0.02569451 | -3.17744653 |     |
| IAH1     | 0.39383822  | 0.02569451 | 3.17759647  |     |
| NPPC     | -0.39382627 | 0.02569451 | -3.17748238 |     |
| GABRA4   | -0.39375392 | 0.02572980 | -3.17679151 |     |
| C1orf71  | 0.39369903  | 0.02573615 | 3.17626745  |     |
| SMPX     | -0.39368755 | 0.02573615 | -3.17615784 |     |
| KCTD8    | -0.39372386 | 0.02573615 | -3.17650449 |     |
| ASB10    | -0.39356701 | 0.02575727 | -3.17500707 |     |
| C19orf45 | -0.39362449 | 0.02575727 | -3.17555575 |     |
| KPNA1    | 0.39354328  | 0.02575727 | 3.17478054  |     |
| UNQ6190  | -0.39354432 | 0.02575727 | -3.17479050 |     |
| CASP7    | 0.39360262  | 0.02575727 | 3.17534698  |     |
| MED17    | 0.39358460  | 0.02575727 | 3.17517492  |     |
| SGK3     | 0.39352144  | 0.02575923 | 3.17457208  |     |
| CCL8     | -0.39349846 | 0.02576203 | -3.17435268 |     |
| RNF145   | 0.39346146  | 0.02576543 | 3.17399952  |     |
| DNAJC15  | 0.39345556  | 0.02576543 | 3.17394325  |     |
| ZNF787   | -0.39333835 | 0.02576963 | -3.17282467 |     |
| SPATA3   | -0.39320269 | 0.02576963 | -3.17153018 |     |
| SRCRB4D  | -0.39332420 | 0.02576963 | -3.17268966 |     |
| DDX5     | 0.39338553  | 0.02576963 | 3.17327491  |     |
| OR10AG1  | -0.39326831 | 0.02576963 | -3.17215629 |     |
| NDUFS2   | 0.39324344  | 0.02576963 | 3.17191903  |     |
| Magmas   | -0.39340434 | 0.02576963 | -3.17345438 |     |

|              |             |            |             |     |
|--------------|-------------|------------|-------------|-----|
| PSG9         | -0.39322705 | 0.02576963 | -3.17176264 |     |
| TMBIM6       | 0.39332781  | 0.02576963 | 3.17272407  |     |
| LOC727726    | 0.39325333  | 0.02576963 | 3.17201334  |     |
| HIST1H2BN    | -0.39321382 | 0.02576963 | -3.17163642 |     |
| B4GALT5      | 0.39320943  | 0.02576963 | 3.17159447  |     |
| CD33         | -0.39342203 | 0.02576963 | -3.17362323 |     |
| MTNR1B       | -0.39317399 | 0.02577660 | -3.17125640 |     |
| WBSCR17      | -0.39314076 | 0.02578682 | -3.17093936 |     |
| LOC285550    | 0.39311850  | 0.02578921 | 3.17072700  |     |
| DBNDD1       | -0.39309267 | 0.02579415 | -3.17048054 |     |
| ASB2         | -0.39304652 | 0.02581363 | -3.17004032 |     |
| FOXO4        | -0.39302313 | 0.02581684 | -3.16981717 |     |
| APOBEC2      | -0.39286744 | 0.02582759 | -3.16833231 |     |
| COPB1        | 0.39294293  | 0.02582759 | 3.16905227  |     |
| LOC441179    | -0.39289783 | 0.02582759 | -3.16862209 |     |
| PARD6A       | -0.39287976 | 0.02582759 | -3.16844984 |     |
| LOC100133422 | 0.39297654  | 0.02582759 | 3.16937285  | yes |
| AAACL1       | 0.39296661  | 0.02582759 | 3.16927812  |     |
| hCG_1781062  | 0.39285724  | 0.02582759 | 3.16823503  |     |
| SLC30A2      | -0.39289451 | 0.02582759 | -3.16859051 |     |
| DUSP8        | -0.39279186 | 0.02586089 | -3.16761161 |     |
| PRDM14       | -0.39276900 | 0.02586379 | -3.16739360 |     |
| PSMC6        | 0.39269240  | 0.02587607 | 3.16666327  |     |
| RAB3A        | -0.39269318 | 0.02587607 | -3.16667068 |     |
| TMEM121      | -0.39267668 | 0.02587607 | -3.16651335 |     |
| C12orf65     | -0.39269125 | 0.02587607 | -3.16665231 |     |
| FGF19        | -0.39261705 | 0.02590534 | -3.16594484 |     |
| SEMA3A       | 0.39258452  | 0.02591520 | 3.16563478  | yes |
| ACTL7B       | -0.39252721 | 0.02592211 | -3.16508850 |     |
| IDI1         | 0.39251281  | 0.02592211 | 3.16495118  |     |
| RPGRIP1      | -0.39254065 | 0.02592211 | -3.16521657 |     |
| CGNL1        | -0.39249992 | 0.02592211 | -3.16482829 |     |
| B3GNT2       | 0.39236322  | 0.02595519 | 3.16352552  |     |
| GNB1         | 0.39237651  | 0.02595519 | 3.16365216  |     |
| LOC100133408 | -0.39238642 | 0.02595519 | -3.16374662 |     |
| C21orf125    | -0.39239296 | 0.02595519 | -3.16380888 |     |
| DYNLT3       | 0.39236026  | 0.02595519 | 3.16349728  |     |
| MAN1A2       | 0.39230400  | 0.02597294 | 3.16296111  |     |
| LRIT1        | -0.39229816 | 0.02597294 | -3.16290546 |     |
| C21orf93     | -0.39221632 | 0.02598971 | -3.16212569 |     |
| ANXA2        | 0.39218353  | 0.02598971 | 3.16181326  | yes |
| LOC375295    | -0.39225290 | 0.02598971 | -3.16247426 | yes |
| PIPOX        | -0.39223527 | 0.02598971 | -3.16230620 |     |
| CDC23        | 0.39218155  | 0.02598971 | 3.16179445  |     |
| ACTL7A       | -0.39215958 | 0.02599211 | -3.16158513 |     |
| ZNF780A      | 0.39210295  | 0.02599270 | 3.16104557  |     |
| POMC         | -0.39211977 | 0.02599270 | -3.16120580 |     |
| KIAA0391     | 0.39210827  | 0.02599270 | 3.16109630  |     |
| RBM14        | 0.39200773  | 0.02602716 | 3.16013854  |     |
| PURG         | -0.39199651 | 0.02602716 | -3.16003169 |     |

|              |             |            |             |     |
|--------------|-------------|------------|-------------|-----|
| AVPR1B       | -0.39198064 | 0.02602716 | -3.15988055 |     |
| GUF1         | 0.39199060  | 0.02602716 | 3.15997534  |     |
| LOC100133395 | -0.39190407 | 0.02602888 | -3.15915123 |     |
| WDFY1        | 0.39190474  | 0.02602888 | 3.15915758  |     |
| SPP2         | -0.39194038 | 0.02602888 | -3.15949703 |     |
| CAMK2A       | -0.39190864 | 0.02602888 | -3.15919479 |     |
| ADORA3       | -0.39186498 | 0.02604365 | -3.15877894 |     |
| BLOC1S3      | -0.39182217 | 0.02606112 | -3.15837126 | yes |
| PCK1         | -0.39168659 | 0.02612749 | -3.15708031 |     |
| SMARCD3      | -0.39167446 | 0.02612749 | -3.15696483 | yes |
| CNTN2        | -0.39168400 | 0.02612749 | -3.15705566 |     |
| GLYAT        | -0.39147410 | 0.02615858 | -3.15505753 |     |
| CHRNA4       | -0.39146198 | 0.02615858 | -3.15494213 |     |
| CNKSR2       | -0.39146605 | 0.02615858 | -3.15498092 |     |
| IRF2BP1      | -0.39144677 | 0.02615858 | -3.15479744 | yes |
| KRTAP10-12   | -0.39160830 | 0.02615858 | -3.15633495 |     |
| NAP1L4       | 0.39147400  | 0.02615858 | 3.15505654  |     |
| SERPINA5     | -0.39155160 | 0.02615858 | -3.15579519 |     |
| ZIC1         | -0.39149720 | 0.02615858 | -3.15527735 |     |
| ANKRD53      | -0.39152024 | 0.02615858 | -3.15549672 |     |
| C14orf43     | -0.39154207 | 0.02615858 | -3.15570455 |     |
| OXA1L        | 0.39141331  | 0.02616943 | 3.15447897  |     |
| LECT1        | -0.39135851 | 0.02618242 | -3.15395740 |     |
| NOXO1        | -0.39136072 | 0.02618242 | -3.15397842 |     |
| FUSIP1       | 0.39115634  | 0.02620981 | 3.15203371  |     |
| ADCYAP1R1    | -0.39100954 | 0.02620981 | -3.15063723 |     |
| CLPS         | -0.39099639 | 0.02620981 | -3.15051216 |     |
| PM20D1       | -0.39097917 | 0.02620981 | -3.15034837 |     |
| UBL4B        | -0.39120872 | 0.02620981 | -3.15253210 |     |
| DCLK2        | -0.39092092 | 0.02620981 | -3.14979433 |     |
| PCSK9        | -0.39113599 | 0.02620981 | -3.15184007 |     |
| TMEM151A     | -0.39082499 | 0.02620981 | -3.14888199 |     |
| KLK5         | -0.39069925 | 0.02620981 | -3.14768640 |     |
| VCX          | -0.39119100 | 0.02620981 | -3.15236344 |     |
| VENTX        | -0.39072483 | 0.02620981 | -3.14792964 |     |
| FAM177A1     | 0.39068338  | 0.02620981 | 3.14753552  |     |
| RABL3        | 0.39101228  | 0.02620981 | 3.15066329  |     |
| C3orf53      | -0.39104439 | 0.02620981 | -3.15096875 |     |
| HOXD11       | -0.39102527 | 0.02620981 | -3.15078683 |     |
| H1FNT        | -0.39097324 | 0.02620981 | -3.15029191 |     |
| KCNJ11       | -0.39094059 | 0.02620981 | -3.14998144 |     |
| MSX1         | -0.39079193 | 0.02620981 | -3.14856768 |     |
| NUP98        | 0.39110803  | 0.02620981 | 3.15157409  |     |
| MRPS16       | 0.39127483  | 0.02620981 | 3.15316114  |     |
| SLC45A2      | -0.39075933 | 0.02620981 | -3.14825765 |     |
| PPP1R12C     | -0.39068178 | 0.02620981 | -3.14752028 | yes |
| PPP1R1A      | -0.39078797 | 0.02620981 | -3.14853000 |     |
| INTS10       | 0.39075661  | 0.02620981 | 3.14823183  |     |
| UBA6         | 0.39075626  | 0.02620981 | 3.14822846  |     |
| AGPAT5       | 0.39082581  | 0.02620981 | 3.14888977  |     |

|              |             |            |             |     |
|--------------|-------------|------------|-------------|-----|
| KCNQ1DN      | -0.39107376 | 0.02620981 | -3.15124810 |     |
| NPLOC4       | 0.39112508  | 0.02620981 | 3.15173629  |     |
| C9orf29      | -0.39071839 | 0.02620981 | -3.14786837 |     |
| HHIPL2       | -0.39069899 | 0.02620981 | -3.14768396 |     |
| C21orf67     | -0.39108809 | 0.02620981 | -3.15138440 |     |
| ZNF496       | -0.39099946 | 0.02620981 | -3.15054131 |     |
| TBRG1        | 0.39108322  | 0.02620981 | 3.15133811  |     |
| NKD1         | -0.39076741 | 0.02620981 | -3.14833445 | yes |
| CCNT2        | 0.39095518  | 0.02620981 | 3.15012015  |     |
| MAPT         | -0.39059530 | 0.02624607 | -3.14669813 |     |
| TAC3         | -0.39060285 | 0.02624607 | -3.14676993 |     |
| CTSC         | 0.39056787  | 0.02625281 | 3.14643735  |     |
| MAGEB16      | -0.39051706 | 0.02626338 | -3.14595438 |     |
| TNFSF18      | -0.39051919 | 0.02626338 | -3.14597459 |     |
| COPS6        | 0.39043334  | 0.02629462 | 3.14515864  |     |
| IFNA16       | -0.39040157 | 0.02629462 | -3.14485670 |     |
| NRTN         | -0.39043810 | 0.02629462 | -3.14520390 | yes |
| FIZ1         | -0.39040757 | 0.02629462 | -3.14491367 |     |
| ACTRT2       | -0.39033370 | 0.02629638 | -3.14421168 | yes |
| SLC44A1      | 0.39037099  | 0.02629638 | 3.14456603  |     |
| COMMD2       | 0.39036093  | 0.02629638 | 3.14447043  | yes |
| UTP6         | 0.39032703  | 0.02629638 | 3.14414824  |     |
| TMEM132D     | -0.39028557 | 0.02631332 | -3.14375426 |     |
| DMRTA1       | -0.39026710 | 0.02631366 | -3.14357876 |     |
| HSPA9        | 0.39022845  | 0.02632859 | 3.14321151  |     |
| PRND         | -0.39019810 | 0.02633638 | -3.14292317 |     |
| CACNA1G      | -0.39018171 | 0.02633638 | -3.14276743 |     |
| C21orf62     | -0.39011104 | 0.02636150 | -3.14209607 |     |
| C1orf163     | 0.39012669  | 0.02636150 | 3.14224473  |     |
| KCTD18       | 0.39005046  | 0.02639236 | 3.14152053  |     |
| TSGA13       | -0.38998389 | 0.02640441 | -3.14088819 |     |
| JMJD2C       | 0.38997387  | 0.02640441 | 3.14079297  |     |
| NPFFR1       | -0.38997901 | 0.02640441 | -3.14084182 | yes |
| ATG3         | 0.38996206  | 0.02640441 | 3.14068086  |     |
| CGREF1       | -0.38981674 | 0.02644485 | -3.13930070 |     |
| IL34         | -0.38983478 | 0.02644485 | -3.13947197 | yes |
| C11orf76     | -0.38982934 | 0.02644485 | -3.13942032 |     |
| PSEN1        | 0.38982578  | 0.02644485 | 3.13938650  |     |
| UBTD1        | -0.38982664 | 0.02644485 | -3.13939471 |     |
| LOC100130274 | -0.38935562 | 0.02648403 | -3.13492318 |     |
| SORBS3       | -0.38968555 | 0.02648403 | -3.13805494 |     |
| PRG3         | -0.38955283 | 0.02648403 | -3.13679499 |     |
| SLC2A6       | -0.38925035 | 0.02648403 | -3.13392422 | yes |
| KLRAQ1       | 0.38937233  | 0.02648403 | 3.13508172  |     |
| CRK          | 0.38917820  | 0.02648403 | 3.13323960  |     |
| TXLNA        | 0.38941003  | 0.02648403 | 3.13543958  |     |
| DHRS7C       | -0.38972258 | 0.02648403 | -3.13840658 |     |
| C7orf51      | -0.38917649 | 0.02648403 | -3.13322336 |     |
| FGF3         | -0.38926823 | 0.02648403 | -3.13409381 |     |
| PLCB1        | -0.38926882 | 0.02648403 | -3.13409947 |     |

|           |             |            |             |     |
|-----------|-------------|------------|-------------|-----|
| TGDS      | 0.38939429  | 0.02648403 | 3.13529015  |     |
| C9orf4    | -0.38946955 | 0.02648403 | -3.13600442 | yes |
| SLCO4A1   | -0.38950363 | 0.02648403 | -3.13632791 | yes |
| GZMM      | -0.38922595 | 0.02648403 | -3.13369269 |     |
| OR3A4     | -0.38959079 | 0.02648403 | -3.13715537 |     |
| C14orf180 | -0.38971260 | 0.02648403 | -3.13831179 |     |
| C6orf138  | -0.38947450 | 0.02648403 | -3.13605146 |     |
| NDUFA4    | 0.38931687  | 0.02648403 | 3.13455544  |     |
| C18orf56  | -0.38919539 | 0.02648403 | -3.13340267 |     |
| RAB6B     | -0.38949307 | 0.02648403 | -3.13622768 |     |
| UEVLD     | 0.38926636  | 0.02648403 | 3.13407614  |     |
| FAR2      | 0.38958851  | 0.02648403 | 3.13713371  |     |
| GPR158    | -0.38942243 | 0.02648403 | -3.13555721 |     |
| PAPPA2    | -0.38964662 | 0.02648403 | -3.13768540 |     |
| ARV1      | 0.38932780  | 0.02648403 | 3.13465917  |     |
| NDRG4     | -0.38944756 | 0.02648403 | -3.13579572 |     |
| SLC12A3   | -0.38968423 | 0.02648403 | -3.13804248 |     |
| SYN1      | -0.38947671 | 0.02648403 | -3.13607243 |     |
| SPATA9    | -0.38962663 | 0.02648403 | -3.13749561 |     |
| HSDL2     | 0.38959433  | 0.02648403 | 3.13718892  |     |
| SPOCD1    | -0.38936712 | 0.02648403 | -3.13503225 |     |
| PLAA      | 0.38923817  | 0.02648403 | 3.13380859  |     |
| YME1L1    | 0.38914487  | 0.02649417 | 3.13292336  |     |
| C1orf146  | -0.38910903 | 0.02650738 | -3.13258336 |     |
| WNK2      | -0.38904551 | 0.02654070 | -3.13198072 |     |
| CLEC11A   | -0.38899103 | 0.02656068 | -3.13146394 | yes |
| SPSB4     | -0.38898277 | 0.02656068 | -3.13138564 | yes |
| CALR3     | -0.38890811 | 0.02660216 | -3.13067751 |     |
| CETP      | -0.38870178 | 0.02666545 | -3.12872081 |     |
| GABRG2    | -0.38863047 | 0.02666545 | -3.12804474 |     |
| GLCE      | 0.38868750  | 0.02666545 | 3.12858544  |     |
| OR4X1     | -0.38865804 | 0.02666545 | -3.12830612 |     |
| NKX2-2    | -0.38865127 | 0.02666545 | -3.12824188 |     |
| SLC25A40  | 0.38864454  | 0.02666545 | 3.12817815  |     |
| TBC1D24   | -0.38862704 | 0.02666545 | -3.12801218 |     |
| FLJ43763  | -0.38861048 | 0.02666545 | -3.12785519 |     |
| WDR61     | 0.38877647  | 0.02666545 | 3.12942907  |     |
| FZD6      | 0.38871090  | 0.02666545 | 3.12880731  |     |
| RIPK1     | 0.38872257  | 0.02666545 | 3.12891799  |     |
| TBC1D27   | -0.38872846 | 0.02666545 | -3.12897377 |     |
| OBSL1     | -0.38856311 | 0.02668720 | -3.12740616 |     |
| SIN3A     | 0.38852462  | 0.02669431 | 3.12704122  |     |
| MIOX      | -0.38851837 | 0.02669431 | -3.12698195 |     |
| TXNL4B    | 0.38848939  | 0.02670268 | 3.12670726  |     |
| SLC15A4   | 0.38841589  | 0.02670530 | 3.12601057  |     |
| KIAA0776  | 0.38845648  | 0.02670530 | 3.12639530  |     |
| PGK1      | 0.38842854  | 0.02670530 | 3.12613049  |     |
| RARS      | 0.38844248  | 0.02670530 | 3.12626269  |     |
| HK3       | -0.38837812 | 0.02672012 | -3.12565260 |     |
| FAM53C    | -0.38829378 | 0.02676896 | -3.12485338 |     |

|              |             |            |             |     |
|--------------|-------------|------------|-------------|-----|
| MPZL2        | 0.38817485  | 0.02680491 | 3.12372645  |     |
| RTN4RL2      | -0.38819685 | 0.02680491 | -3.12393490 |     |
| RAB9B        | -0.38820687 | 0.02680491 | -3.12402985 |     |
| MYST3        | 0.38819189  | 0.02680491 | 3.12388785  |     |
| PRPSAP2      | 0.38814035  | 0.02681741 | 3.12339949  |     |
| RWDD2B       | 0.38805388  | 0.02686799 | 3.12258030  |     |
| NGB          | -0.38803476 | 0.02686923 | -3.12239925 |     |
| SELV         | -0.38799433 | 0.02688612 | -3.12201623 |     |
| BANF2        | -0.38796355 | 0.02689593 | -3.12172462 |     |
| BCCIP        | 0.38793937  | 0.02690091 | 3.12149566  |     |
| SLC38A3      | -0.38791953 | 0.02690271 | -3.12130771 |     |
| LOC100133404 | -0.38783754 | 0.02694320 | -3.12053119 | yes |
| PXMP3        | 0.38782963  | 0.02694320 | 3.12045624  |     |
| SNORA5B      | -0.38780277 | 0.02695017 | -3.12020186 |     |
| OR2L13       | -0.38777716 | 0.02695624 | -3.11995933 |     |
| LOC100130858 | -0.38774048 | 0.02695769 | -3.11961199 |     |
| ACBD5        | 0.38775716  | 0.02695769 | 3.11977003  |     |
| SHD          | -0.38766246 | 0.02700231 | -3.11887327 |     |
| ITGA10       | -0.38764226 | 0.02700441 | -3.11868206 |     |
| ATPGD1       | -0.38761070 | 0.02701489 | -3.11838326 |     |
| NAPSA        | -0.38757836 | 0.02702594 | -3.11807709 | yes |
| LOC100129540 | -0.38725336 | 0.02703659 | -3.11500092 |     |
| HRH3         | -0.38729708 | 0.02703659 | -3.11541461 |     |
| CPN2         | -0.38734609 | 0.02703659 | -3.11587843 |     |
| PTF1A        | -0.38738279 | 0.02703659 | -3.11622581 |     |
| OR2W1        | -0.38725780 | 0.02703659 | -3.11504291 |     |
| PCSK1N       | -0.38736264 | 0.02703659 | -3.11603510 |     |
| SERPINA9     | -0.38727204 | 0.02703659 | -3.11517764 |     |
| TCEB3B       | -0.38731735 | 0.02703659 | -3.11560649 |     |
| PIGC         | 0.38735595  | 0.02703659 | 3.11597179  |     |
| EXOC1        | 0.38731694  | 0.02703659 | 3.11560256  |     |
| RGMA         | -0.38732520 | 0.02703659 | -3.11568077 |     |
| MTMR9        | 0.38727969  | 0.02703659 | 3.11525010  |     |
| SCARNA16     | -0.38738740 | 0.02703659 | -3.11626944 | yes |
| TSHR         | -0.38737558 | 0.02703659 | -3.11615757 |     |
| CNTD2        | -0.38750329 | 0.02703659 | -3.11736634 |     |
| NCK2         | 0.38737100  | 0.02703659 | 3.11611424  |     |
| SLC7A3       | -0.38730536 | 0.02703659 | -3.11549300 |     |
| CHRD         | -0.38739797 | 0.02703659 | -3.11636945 | yes |
| FLJ45139     | -0.38714788 | 0.02708895 | -3.11400285 |     |
| EAF2         | 0.38715807  | 0.02708895 | 3.11409922  |     |
| BTBD10       | 0.38712072  | 0.02709631 | 3.11374588  |     |
| C1orf62      | -0.38709261 | 0.02710438 | -3.11347991 |     |
| DHRS2        | -0.38703110 | 0.02711179 | -3.11289797 |     |
| LCN6         | -0.38703801 | 0.02711179 | -3.11296341 | yes |
| TMEM87A      | 0.38706064  | 0.02711179 | 3.11317741  |     |
| LOC100133423 | -0.38695966 | 0.02715185 | -3.11222220 |     |
| LOC100132394 | -0.38656432 | 0.02716358 | -3.10848360 |     |
| MAB21L2      | -0.38678776 | 0.02716358 | -3.11059637 |     |
| ARAP2        | 0.38672592  | 0.02716358 | 3.11001153  |     |



|           |             |            |             |     |
|-----------|-------------|------------|-------------|-----|
| COL4A3    | -0.38660999 | 0.02716358 | -3.10891536 |     |
| TTC36     | -0.38664797 | 0.02716358 | -3.10927447 |     |
| FAM91A1   | 0.38655435  | 0.02716358 | 3.10838934  |     |
| EPYC      | -0.38664241 | 0.02716358 | -3.10922194 |     |
| RNF182    | -0.38664776 | 0.02716358 | -3.10927252 |     |
| FRAT2     | -0.38684817 | 0.02716358 | -3.11116766 |     |
| SENP1     | 0.38665349  | 0.02716358 | 3.10932672  |     |
| NONO      | 0.38683230  | 0.02716358 | 3.11101757  |     |
| FRMD4A    | -0.38685441 | 0.02716358 | -3.11122666 |     |
| KCNQ5     | -0.38655124 | 0.02716358 | -3.10835999 |     |
| SEMA3G    | -0.38653747 | 0.02716358 | -3.10822976 | yes |
| CDC42SE2  | 0.38665379  | 0.02716358 | 3.10932957  |     |
| ABCD3     | 0.38680109  | 0.02716358 | 3.11072243  |     |
| S100A5    | -0.38655772 | 0.02716358 | -3.10842126 |     |
| TBXA2R    | -0.38654304 | 0.02716358 | -3.10828243 |     |
| TGM4      | -0.38660941 | 0.02716358 | -3.10890995 |     |
| TRPM3     | -0.38653443 | 0.02716358 | -3.10820106 |     |
| SESN2     | -0.38654313 | 0.02716358 | -3.10828332 |     |
| FBN3      | -0.38662017 | 0.02716358 | -3.10901163 |     |
| TCAP      | -0.38684294 | 0.02716358 | -3.11111817 |     |
| MINPP1    | 0.38691622  | 0.02716358 | 3.11181135  |     |
| RIMS4     | -0.38637693 | 0.02718210 | -3.10671223 |     |
| CTBS      | 0.38638404  | 0.02718210 | 3.10677943  |     |
| TMEM154   | 0.38645035  | 0.02718210 | 3.10740620  | yes |
| GABRA5    | -0.38643467 | 0.02718210 | -3.10725797 |     |
| IL1F8     | -0.38638866 | 0.02718210 | -3.10682313 |     |
| GLRX      | 0.38635686  | 0.02718210 | 3.10652261  |     |
| C6orf58   | -0.38640278 | 0.02718210 | -3.10695660 |     |
| C6orf115  | 0.38642525  | 0.02718210 | 3.10716898  |     |
| MFSD1     | 0.38637063  | 0.02718210 | 3.10665271  |     |
| DOCK3     | -0.38630409 | 0.02720470 | -3.10602386 |     |
| OR1G1     | -0.38629242 | 0.02720470 | -3.10591359 |     |
| KLHDC8A   | -0.38624809 | 0.02721248 | -3.10549466 |     |
| ABCE1     | 0.38625260  | 0.02721248 | 3.10553721  |     |
| TMEM186   | 0.38614158  | 0.02726624 | 3.10448820  |     |
| MAPK9     | 0.38614644  | 0.02726624 | 3.10453407  |     |
| SYCP2L    | -0.38610182 | 0.02727069 | -3.10411249 |     |
| XRCC6     | 0.38610189  | 0.02727069 | 3.10411318  |     |
| OSTF1     | 0.38606392  | 0.02728625 | 3.10375448  |     |
| MCF2      | -0.38600106 | 0.02730583 | -3.10316056 |     |
| PLA2G4A   | 0.38600360  | 0.02730583 | 3.10318454  |     |
| ARRDC4    | 0.38598693  | 0.02730583 | 3.10302709  |     |
| FAM172A   | 0.38594738  | 0.02732264 | 3.10265353  |     |
| METTL9    | 0.38584978  | 0.02738251 | 3.10173166  |     |
| LOC440563 | -0.38582619 | 0.02738753 | -3.10150883 |     |
| LOC652904 | -0.38579746 | 0.02739399 | -3.10123753 |     |
| GFM2      | 0.38578386  | 0.02739399 | 3.10110905  | yes |
| PDCL2     | -0.38563665 | 0.02743017 | -3.09971893 |     |
| AGXT2L1   | -0.38570048 | 0.02743017 | -3.10032168 |     |
| WNT6      | -0.38566677 | 0.02743017 | -3.10000329 |     |

|              |             |            |             |     |
|--------------|-------------|------------|-------------|-----|
| ULBP1        | -0.38569441 | 0.02743017 | -3.10026431 |     |
| EPR1         | -0.38565681 | 0.02743017 | -3.09990926 |     |
| ARD1B        | -0.38563439 | 0.02743017 | -3.09969755 |     |
| PRAMEF12     | -0.38556710 | 0.02745525 | -3.09906230 |     |
| LRRC24       | -0.38557002 | 0.02745525 | -3.09908983 |     |
| GNB2L1       | 0.38552484  | 0.02746176 | 3.09866325  |     |
| BRUNOL5      | -0.38553341 | 0.02746176 | -3.09874415 |     |
| KL           | -0.38550700 | 0.02746257 | -3.09849482 |     |
| NDUFAF1      | 0.38546881  | 0.02747852 | 3.09813439  |     |
| CEBPG        | 0.38538305  | 0.02749567 | 3.09732480  |     |
| CRIP3        | -0.38542565 | 0.02749567 | -3.09772697 |     |
| REXO1        | -0.38539707 | 0.02749567 | -3.09745719 | yes |
| STK4         | 0.38537793  | 0.02749567 | 3.09727650  |     |
| KRTAP4-1     | -0.38536217 | 0.02749567 | -3.09712775 |     |
| LOC100128003 | -0.38507049 | 0.02750122 | -3.09437521 |     |
| WASF3        | -0.38521270 | 0.02750122 | -3.09571708 |     |
| COL8A2       | -0.38524917 | 0.02750122 | -3.09606125 | yes |
| AHR          | 0.38514877  | 0.02750122 | 3.09511386  |     |
| FUT4         | -0.38528288 | 0.02750122 | -3.09637941 |     |
| GATA1        | -0.38514769 | 0.02750122 | -3.09510365 |     |
| SH2D6        | -0.38516736 | 0.02750122 | -3.09528929 |     |
| ARF1         | 0.38514830  | 0.02750122 | 3.09510939  |     |
| PRR16        | -0.38511850 | 0.02750122 | -3.09482819 |     |
| RASD1        | -0.38527109 | 0.02750122 | -3.09626814 |     |
| ACCN5        | -0.38510054 | 0.02750122 | -3.09465880 |     |
| SFRS3        | 0.38505515  | 0.02750122 | 3.09423049  |     |
| TRMT2B       | 0.38531638  | 0.02750122 | 3.09669554  |     |
| PLA2G12A     | -0.38506747 | 0.02750122 | -3.09434678 |     |
| JPH4         | -0.38511877 | 0.02750122 | -3.09483074 |     |
| ARTN         | -0.38528373 | 0.02750122 | -3.09638745 |     |
| AATK         | -0.38521728 | 0.02750122 | -3.09576031 |     |
| KBTBD11      | -0.38509385 | 0.02750122 | -3.09459559 |     |
| STRAP        | 0.38501882  | 0.02750309 | 3.09388776  |     |
| LCE3E        | -0.38502368 | 0.02750309 | -3.09393361 |     |
| RAC3         | -0.38500290 | 0.02750309 | -3.09373758 |     |
| LIPC         | -0.38496508 | 0.02750660 | -3.09338075 |     |
| KBTBD4       | 0.38497243  | 0.02750660 | 3.09345013  |     |
| PDCD1        | -0.38492285 | 0.02752569 | -3.09298237 |     |
| CCDC38       | -0.38489133 | 0.02753683 | -3.09268505 |     |
| NMS          | -0.38486218 | 0.02754621 | -3.09241017 |     |
| NOTCH4       | -0.38484531 | 0.02754647 | -3.09225104 |     |
| ACAN         | -0.38478654 | 0.02757792 | -3.09169672 |     |
| EPHA10       | -0.38475659 | 0.02758792 | -3.09141428 |     |
| SPATA12      | -0.38470364 | 0.02761508 | -3.09091488 |     |
| IBTK         | 0.38467172  | 0.02762657 | 3.09061393  |     |
| CRLF3        | 0.38460817  | 0.02764936 | 3.09001471  |     |
| SLC2A4       | -0.38460867 | 0.02764936 | -3.09001939 |     |
| C2orf37      | 0.38457398  | 0.02766258 | 3.08969229  |     |
| FLJ11151     | 0.38453722  | 0.02767771 | 3.08934577  |     |
| KLHL18       | 0.38450790  | 0.02768730 | 3.08906934  |     |

|           |             |            |             |     |
|-----------|-------------|------------|-------------|-----|
| ERCC4     | 0.38446960  | 0.02770362 | 3.08870819  |     |
| PCGF2     | -0.38443158 | 0.02771973 | -3.08834977 |     |
| MYO7B     | -0.38436713 | 0.02775564 | -3.08774225 | yes |
| STX1B     | -0.38432472 | 0.02775768 | -3.08734252 |     |
| TMCO1     | 0.38426573  | 0.02775768 | 3.08678661  |     |
| TMEM126B  | 0.38428911  | 0.02775768 | 3.08700697  |     |
| NRIP1     | 0.38428138  | 0.02775768 | 3.08693404  |     |
| SLC25A18  | -0.38428030 | 0.02775768 | -3.08692386 |     |
| KIRREL2   | -0.38433893 | 0.02775768 | -3.08747650 |     |
| SP5       | -0.38420972 | 0.02778733 | -3.08625870 |     |
| ASH2L     | 0.38412749  | 0.02783666 | 3.08548386  |     |
| UBE2DNL   | -0.38375497 | 0.02784725 | -3.08197455 |     |
| ADAMTS7   | -0.38356814 | 0.02784725 | -3.08021522 |     |
| OR11H6    | -0.38368320 | 0.02784725 | -3.08129863 |     |
| PLK5P     | -0.38363330 | 0.02784725 | -3.08082878 | yes |
| FAM148C   | -0.38381933 | 0.02784725 | -3.08258066 |     |
| OTOA      | -0.38385714 | 0.02784725 | -3.08293686 |     |
| KRT25     | -0.38397308 | 0.02784725 | -3.08402897 |     |
| OLIG3     | -0.38405385 | 0.02784725 | -3.08478997 |     |
| SAMD14    | -0.38386119 | 0.02784725 | -3.08297497 |     |
| AK3L1     | -0.38384406 | 0.02784725 | -3.08281362 |     |
| OR5M11    | -0.38375408 | 0.02784725 | -3.08196613 |     |
| NT5C2     | 0.38377924  | 0.02784725 | 3.08220310  |     |
| PRR17     | -0.38362867 | 0.02784725 | -3.08078515 |     |
| HADHA     | 0.38360494  | 0.02784725 | 3.08056165  |     |
| LOC401433 | -0.38399992 | 0.02784725 | -3.08428190 |     |
| KRCC1     | 0.38376586  | 0.02784725 | 3.08207706  |     |
| ATP6V1H   | 0.38358277  | 0.02784725 | 3.08035291  |     |
| POU6F1    | -0.38368886 | 0.02784725 | -3.08135192 |     |
| GJD2      | -0.38378321 | 0.02784725 | -3.08224054 |     |
| RAB27A    | 0.38363274  | 0.02784725 | 3.08082341  |     |
| RPS11     | 0.38381795  | 0.02784725 | 3.08256770  |     |
| SFRS7     | 0.38355894  | 0.02784725 | 3.08012856  |     |
| C15orf56  | -0.38367890 | 0.02784725 | -3.08125816 |     |
| CTAGE1    | -0.38354268 | 0.02784725 | -3.07997547 |     |
| TNS3      | -0.38374216 | 0.02784725 | -3.08185387 |     |
| SOX3      | -0.38355215 | 0.02784725 | -3.08006460 |     |
| TRGV5     | -0.38355982 | 0.02784725 | -3.08013685 |     |
| MKRN3     | -0.38367816 | 0.02784725 | -3.08125114 |     |
| PRR14     | -0.38379348 | 0.02784725 | -3.08233727 |     |
| ABHD8     | -0.38387094 | 0.02784725 | -3.08306682 |     |
| CUL3      | 0.38369645  | 0.02784725 | 3.08142339  |     |
| FUBP3     | 0.38389460  | 0.02784725 | 3.08328974  |     |
| SYT7      | -0.38400573 | 0.02784725 | -3.08433659 |     |
| H2AFV     | 0.38361598  | 0.02784725 | 3.08066564  |     |
| NUP153    | 0.38380557  | 0.02784725 | 3.08245110  | yes |
| TAPT1     | 0.38331138  | 0.02787527 | 3.07779801  |     |
| TRIM32    | 0.38343101  | 0.02787527 | 3.07892412  |     |
| TMEM9     | 0.38332427  | 0.02787527 | 3.07791937  |     |
| POL3S     | -0.38336191 | 0.02787527 | -3.07827369 |     |

|              |             |            |             |     |
|--------------|-------------|------------|-------------|-----|
| RPRML        | -0.38335630 | 0.02787527 | -3.07822086 |     |
| OR11H4       | -0.38333037 | 0.02787527 | -3.07797680 |     |
| NDUFS1       | 0.38347657  | 0.02787527 | 3.07935304  |     |
| PDE6G        | -0.38345687 | 0.02787527 | -3.07916758 |     |
| TDP1         | 0.38339447  | 0.02787527 | 3.07858012  | yes |
| PRDM12       | -0.38337268 | 0.02787527 | -3.07837507 |     |
| ZAN          | -0.38345132 | 0.02787527 | -3.07911535 |     |
| ANGEL2       | 0.38333108  | 0.02787527 | 3.07798346  |     |
| RP11-93B14.6 | -0.38329375 | 0.02787640 | -3.07763210 |     |
| CDH24        | -0.38327359 | 0.02787944 | -3.07744234 |     |
| ANKRD28      | 0.38310551  | 0.02791346 | 3.07586051  |     |
| CACNG5       | -0.38320172 | 0.02791346 | -3.07676589 |     |
| CXCL3        | -0.38315260 | 0.02791346 | -3.07630366 |     |
| LHFPL4       | -0.38317212 | 0.02791346 | -3.07648737 |     |
| GPR152       | -0.38313761 | 0.02791346 | -3.07616262 |     |
| RPL23AP71    | -0.38310717 | 0.02791346 | -3.07587617 | yes |
| VPS33A       | 0.38309952  | 0.02791346 | 3.07580416  |     |
| TPR          | 0.38316335  | 0.02791346 | 3.07640480  |     |
| LELP1        | -0.38306579 | 0.02792671 | -3.07548682 |     |
| OR5I1        | -0.38298999 | 0.02794746 | -3.07477364 |     |
| ITGB6        | 0.38302052  | 0.02794746 | 3.07506086  |     |
| MMP20        | -0.38300356 | 0.02794746 | -3.07490128 |     |
| DYSF         | -0.38296057 | 0.02795751 | -3.07449679 | yes |
| CRHR1        | -0.38277687 | 0.02802333 | -3.07276875 |     |
| ALKBH4       | -0.38283010 | 0.02802333 | -3.07326945 |     |
| TMEM70       | 0.38280846  | 0.02802333 | 3.07306588  |     |
| REG4         | -0.38278104 | 0.02802333 | -3.07280803 |     |
| KRTAP4-4     | -0.38282713 | 0.02802333 | -3.07324155 |     |
| USP10        | 0.38280120  | 0.02802333 | 3.07299764  | yes |
| WFDC13       | -0.38267896 | 0.02805367 | -3.07184797 |     |
| SNORD52      | 0.38267289  | 0.02805367 | 3.07179083  |     |
| NRAP         | -0.38268807 | 0.02805367 | -3.07193361 |     |
| INSM2        | -0.38267257 | 0.02805367 | -3.07178784 |     |
| MMP24        | -0.38264694 | 0.02806094 | -3.07154679 |     |
| SYT14        | -0.38259726 | 0.02808632 | -3.07107968 |     |
| C20orf43     | 0.38258084  | 0.02808667 | 3.07092522  |     |
| WDR92        | 0.38252345  | 0.02809384 | 3.07038560  |     |
| GRIN2C       | -0.38253174 | 0.02809384 | -3.07046354 |     |
| SLC1A2       | -0.38254061 | 0.02809384 | -3.07054698 |     |
| MAGEB18      | -0.38248077 | 0.02811399 | -3.06998435 |     |
| POLD3        | 0.38235134  | 0.02812754 | 3.06876755  |     |
| ADAM29       | -0.38238586 | 0.02812754 | -3.06909200 |     |
| PWWP2A       | -0.38238398 | 0.02812754 | -3.06907435 |     |
| CABP7        | -0.38237331 | 0.02812754 | -3.06897405 |     |
| HAL          | -0.38236586 | 0.02812754 | -3.06890400 |     |
| C15orf52     | -0.38236482 | 0.02812754 | -3.06889421 |     |
| CHMP5        | 0.38236283  | 0.02812754 | 3.06887554  | yes |
| CACNG3       | -0.38222518 | 0.02816312 | -3.06758166 |     |
| FGF8         | -0.38226584 | 0.02816312 | -3.06796381 |     |
| SCML4        | -0.38218631 | 0.02816312 | -3.06721639 |     |

|             |             |            |             |     |
|-------------|-------------|------------|-------------|-----|
| SOCS7       | -0.38227457 | 0.02816312 | -3.06804591 |     |
| KCNN1       | -0.38213232 | 0.02816312 | -3.06670894 |     |
| C13orf35    | -0.38221744 | 0.02816312 | -3.06750896 |     |
| PRKAR2A     | 0.38211377  | 0.02816312 | 3.06653468  | yes |
| MRPS22      | 0.38212842  | 0.02816312 | 3.06667234  |     |
| C7orf36     | 0.38220418  | 0.02816312 | 3.06738434  |     |
| TNNI1       | -0.38216113 | 0.02816312 | -3.06697972 |     |
| RNASEH2C    | -0.38219483 | 0.02816312 | -3.06729648 |     |
| NKD2        | -0.38215087 | 0.02816312 | -3.06688333 |     |
| PPP2R3C     | 0.38209680  | 0.02816398 | 3.06637517  |     |
| FAM78B      | -0.38201445 | 0.02820226 | -3.06560139 |     |
| PSMB3       | 0.38202352  | 0.02820226 | 3.06568662  |     |
| UBE2J1      | 0.38199390  | 0.02820583 | 3.06540831  |     |
| TMEM199     | 0.38195912  | 0.02820823 | 3.06508148  |     |
| KRTAP12-1   | -0.38196142 | 0.02820823 | -3.06510308 |     |
| DAZL        | -0.38190243 | 0.02822719 | -3.06454894 |     |
| KCNA5       | -0.38191344 | 0.02822719 | -3.06465237 |     |
| OR5H15      | -0.38188364 | 0.02822946 | -3.06437244 |     |
| C17orf55    | -0.38184839 | 0.02824417 | -3.06404124 |     |
| SERPINA12   | -0.38179134 | 0.02825154 | -3.06350537 |     |
| BCORL1      | -0.38180556 | 0.02825154 | -3.06363889 |     |
| HIAT1       | 0.38179191  | 0.02825154 | 3.06351073  |     |
| SEMA4F      | -0.38172583 | 0.02826011 | -3.06289003 |     |
| PRR4        | -0.38176375 | 0.02826011 | -3.06324617 |     |
| SLC35D1     | 0.38172053  | 0.02826011 | 3.06284027  |     |
| MOGAT3      | -0.38170127 | 0.02826011 | -3.06265939 |     |
| BRP44L      | 0.38171626  | 0.02826011 | 3.06280009  |     |
| SMTN        | -0.38168486 | 0.02826063 | -3.06250519 | yes |
| GPR143      | -0.38163401 | 0.02827936 | -3.06202763 |     |
| SNORD77     | 0.38162864  | 0.02827936 | 3.06197727  |     |
| TXNDC2      | -0.38158098 | 0.02830354 | -3.06152963 |     |
| SNORD115-31 | -0.38155206 | 0.02831082 | -3.06125812 |     |
| NAT8L       | -0.38152946 | 0.02831082 | -3.06104588 |     |
| PIP         | -0.38151943 | 0.02831082 | -3.06095172 |     |
| ACTA1       | -0.38150855 | 0.02831082 | -3.06084957 |     |
| RBM7        | 0.38148156  | 0.02831892 | 3.06059615  |     |
| KLHDC2      | 0.38145081  | 0.02831892 | 3.06030741  |     |
| SCAF1       | -0.38145596 | 0.02831892 | -3.06035576 |     |
| CITED1      | -0.38135718 | 0.02836612 | -3.05942833 |     |
| UTP15       | 0.38136545  | 0.02836612 | 3.05950603  |     |
| EYA3        | 0.38128795  | 0.02840675 | 3.05877848  |     |
| WDR21C      | -0.38126494 | 0.02841233 | -3.05856251 |     |
| CEND1       | -0.38122432 | 0.02843129 | -3.05818121 |     |
| SULT1C2     | -0.38119901 | 0.02843863 | -3.05794368 |     |
| PEBP4       | -0.38118079 | 0.02843866 | -3.05777267 |     |
| SHOX2       | -0.38115207 | 0.02843866 | -3.05750308 |     |
| TMEM116     | 0.38115253  | 0.02843866 | 3.05750742  |     |
| CRB2        | -0.38099364 | 0.02848151 | -3.05601635 |     |
| HCRT        | -0.38103037 | 0.02848151 | -3.05636103 |     |
| OR4M2       | -0.38099490 | 0.02848151 | -3.05602815 |     |

|              |             |            |             |     |
|--------------|-------------|------------|-------------|-----|
| GMPR2        | 0.38098642  | 0.02848151 | 3.05594860  |     |
| PRLR         | -0.38100786 | 0.02848151 | -3.05614980 |     |
| XPO4         | 0.38099316  | 0.02848151 | 3.05601185  |     |
| SLC6A7       | -0.38106097 | 0.02848151 | -3.05664813 |     |
| SLC2A4RG     | -0.38086356 | 0.02853942 | -3.05479594 |     |
| HSD3B7       | -0.38089218 | 0.02853942 | -3.05506438 |     |
| C6orf62      | 0.38086707  | 0.02853942 | 3.05482881  |     |
| LBX2         | -0.38082065 | 0.02856025 | -3.05439333 |     |
| C4orf34      | 0.38079670  | 0.02856664 | 3.05416864  |     |
| LMBR1        | 0.38071884  | 0.02861415 | 3.05343832  |     |
| SNORD68      | -0.38066962 | 0.02863984 | -3.05297671 |     |
| PLCXD3       | -0.38065202 | 0.02864141 | -3.05281158 |     |
| FEZF2        | -0.38063357 | 0.02864362 | -3.05263859 |     |
| ZNF285B      | -0.38060878 | 0.02865068 | -3.05240605 |     |
| VTI1B        | 0.38059238  | 0.02865133 | 3.05225231  |     |
| PAGE5        | -0.38052221 | 0.02868122 | -3.05159425 |     |
| ZNHIT3       | 0.38052683  | 0.02868122 | 3.05163753  |     |
| PMP22CD      | -0.38048009 | 0.02868631 | -3.05119926 |     |
| NFX1         | 0.38049030  | 0.02868631 | 3.05129502  | yes |
| ZNF561       | 0.38046899  | 0.02868631 | 3.05109521  | yes |
| OAZ1         | 0.38042787  | 0.02870590 | 3.05070965  |     |
| ERLIN1       | 0.38040216  | 0.02871371 | 3.05046858  | yes |
| GPR17        | -0.38036672 | 0.02872897 | -3.05013635 |     |
| SYNGR4       | -0.38032563 | 0.02874445 | -3.04975104 |     |
| GBP3         | 0.38028865  | 0.02874445 | 3.04940444  |     |
| INPP5J       | -0.38028456 | 0.02874445 | -3.04936606 |     |
| DIABLO       | 0.38030150  | 0.02874445 | 3.04952485  |     |
| PPP1R2P9     | -0.38025639 | 0.02875417 | -3.04910201 |     |
| LOC100129346 | -0.38022870 | 0.02876353 | -3.04884244 |     |
| POMP         | 0.38020135  | 0.02877264 | 3.04858605  |     |
| GPR177       | 0.38016302  | 0.02879017 | 3.04822679  |     |
| BRSK1        | -0.37997530 | 0.02892249 | -3.04646753 |     |
| ATF7         | -0.37988487 | 0.02893582 | -3.04562027 |     |
| CRX          | -0.37987018 | 0.02893582 | -3.04548265 |     |
| HSPA4        | 0.37984991  | 0.02893582 | 3.04529267  |     |
| NANOS3       | -0.37985670 | 0.02893582 | -3.04535631 |     |
| ZNF749       | 0.37989117  | 0.02893582 | 3.04567932  |     |
| VPS11        | 0.37988129  | 0.02893582 | 3.04558673  |     |
| RP5-1077B9.4 | -0.37993167 | 0.02893582 | -3.04605874 |     |
| TFF2         | -0.37977706 | 0.02898005 | -3.04461021 |     |
| C16orf73     | -0.37974795 | 0.02899061 | -3.04433750 |     |
| OR2M2        | -0.37965921 | 0.02903530 | -3.04350627 |     |
| ZNF747       | -0.37965977 | 0.02903530 | -3.04351158 |     |
| GPX6         | -0.37963607 | 0.02904127 | -3.04328954 |     |
| VAMP8        | 0.37955414  | 0.02909267 | 3.04252225  |     |
| FAM166A      | -0.37953240 | 0.02909759 | -3.04231858 |     |
| PIK3R5       | -0.37950804 | 0.02910452 | -3.04209053 |     |
| AZIN1        | 0.37945694  | 0.02913216 | 3.04161195  | yes |
| TMEM132E     | -0.37941163 | 0.02915533 | -3.04118770 |     |
| POU5F2       | -0.37935350 | 0.02916423 | -3.04064347 |     |

|              |             |            |             |     |
|--------------|-------------|------------|-------------|-----|
| LRRN4        | -0.37935522 | 0.02916423 | -3.04065950 |     |
| OR10K1       | -0.37937606 | 0.02916423 | -3.04085468 |     |
| PCMT1        | 0.37933868  | 0.02916423 | 3.04050463  |     |
| SLC35F3      | -0.37929108 | 0.02918021 | -3.04005908 |     |
| GDI2         | 0.37925893  | 0.02918021 | 3.03975804  |     |
| CXorf25      | -0.37924979 | 0.02918021 | -3.03967248 |     |
| C14orf115    | -0.37924454 | 0.02918021 | -3.03962330 |     |
| STK17A       | 0.37924134  | 0.02918021 | 3.03959337  |     |
| MANEAL       | -0.37913929 | 0.02918776 | -3.03863809 |     |
| LHFPL5       | -0.37906330 | 0.02918776 | -3.03792694 |     |
| KLHL35       | -0.37921608 | 0.02918776 | -3.03935696 |     |
| KIR3DL2      | -0.37907988 | 0.02918776 | -3.03808209 |     |
| MSLNL        | -0.37906834 | 0.02918776 | -3.03797405 |     |
| NEUROD2      | -0.37915390 | 0.02918776 | -3.03877491 |     |
| NPTX1        | -0.37913847 | 0.02918776 | -3.03863048 |     |
| REG3A        | -0.37907690 | 0.02918776 | -3.03805420 |     |
| PRKAR2B      | -0.37911538 | 0.02918776 | -3.03841435 |     |
| TTBK1        | -0.37913069 | 0.02918776 | -3.03855766 |     |
| OPN4         | -0.37917314 | 0.02918776 | -3.03895501 |     |
| LOC100131506 | -0.37898915 | 0.02920974 | -3.03723296 |     |
| GSX2         | -0.37899350 | 0.02920974 | -3.03727367 |     |
| EXPH5        | 0.37900234  | 0.02920974 | 3.03735640  | yes |
| ZNF207       | 0.37896431  | 0.02921717 | 3.03700054  |     |
| TMTC2        | 0.37894444  | 0.02922076 | 3.03681453  |     |
| FOXN4        | -0.37890134 | 0.02922635 | -3.03641123 |     |
| FABP7        | -0.37888323 | 0.02922635 | -3.03624182 |     |
| SLC22A18AS   | -0.37889621 | 0.02922635 | -3.03636327 |     |
| LST1         | -0.37887629 | 0.02922635 | -3.03617685 |     |
| BPNT1        | 0.37884558  | 0.02923836 | 3.03588955  |     |
| CYP2W1       | -0.37882437 | 0.02924301 | -3.03569104 |     |
| ELFN2        | -0.37874401 | 0.02924639 | -3.03493926 |     |
| C1orf58      | 0.37877255  | 0.02924639 | 3.03520627  | yes |
| OR4D9        | -0.37874897 | 0.02924639 | -3.03498567 |     |
| SRI          | 0.37876697  | 0.02924639 | 3.03515410  | yes |
| EEF1E1       | 0.37876496  | 0.02924639 | 3.03513529  |     |
| HNRNPAB      | 0.37869437  | 0.02926209 | 3.03447489  |     |
| FLJ45983     | -0.37869340 | 0.02926209 | -3.03446584 |     |
| CDSN         | -0.37859634 | 0.02928051 | -3.03355791 |     |
| TMEM18       | 0.37861901  | 0.02928051 | 3.03376996  |     |
| IGFL1        | -0.37862091 | 0.02928051 | -3.03378778 |     |
| RTL1         | -0.37862826 | 0.02928051 | -3.03385647 |     |
| FAM18B       | 0.37859385  | 0.02928051 | 3.03353460  |     |
| KIF12        | -0.37849733 | 0.02934370 | -3.03263191 |     |
| CISD1        | 0.37847073  | 0.02935261 | 3.03238318  |     |
| STK32C       | -0.37842733 | 0.02935278 | -3.03197728 |     |
| LUZP4        | -0.37839486 | 0.02935278 | -3.03167368 |     |
| GALNTL1      | -0.37841140 | 0.02935278 | -3.03182835 | yes |
| SPTBN4       | -0.37840485 | 0.02935278 | -3.03176705 |     |
| TM4SF4       | -0.37842250 | 0.02935278 | -3.03193211 |     |
| HIPK3        | 0.37831279  | 0.02936418 | 3.03090631  | yes |



|           |             |            |             |     |
|-----------|-------------|------------|-------------|-----|
| VASN      | -0.37831254 | 0.02936418 | -3.03090391 | yes |
| FLT3LG    | -0.37832081 | 0.02936418 | -3.03098125 |     |
| PDE6H     | -0.37830468 | 0.02936418 | -3.03083048 |     |
| C1orf200  | -0.37835064 | 0.02936418 | -3.03126019 |     |
| HMGA1     | -0.37828916 | 0.02936451 | -3.03068536 |     |
| JDP2      | -0.37823378 | 0.02937081 | -3.03016758 |     |
| GPR110    | 0.37822076  | 0.02937081 | 3.03004592  |     |
| SCD5      | -0.37824514 | 0.02937081 | -3.03027379 |     |
| OR6K2     | -0.37826273 | 0.02937081 | -3.03043828 |     |
| OR5F1     | -0.37818461 | 0.02938721 | -3.02970796 |     |
| VWCE      | -0.37812794 | 0.02939822 | -3.02917817 |     |
| ADAM2     | -0.37812530 | 0.02939822 | -3.02915355 |     |
| PTH       | -0.37815398 | 0.02939822 | -3.02942161 |     |
| RNF6      | 0.37809561  | 0.02940961 | 3.02887599  | yes |
| H2BFM     | -0.37803506 | 0.02943737 | -3.02831001 |     |
| WFDC1     | -0.37801485 | 0.02943737 | -3.02812121 | yes |
| SILV      | -0.37802831 | 0.02943737 | -3.02824698 |     |
| TARDBP    | 0.37797181  | 0.02945919 | 3.02771892  |     |
| PDE4DIP   | -0.37794412 | 0.02946907 | -3.02746010 |     |
| SNORA38B  | -0.37784428 | 0.02951850 | -3.02652723 |     |
| HEATR5A   | 0.37783678  | 0.02951850 | 3.02645710  |     |
| SCN2B     | -0.37783569 | 0.02951850 | -3.02644696 |     |
| PAR6B     | 0.37781775  | 0.02952080 | 3.02627929  | yes |
| TXNIP     | 0.37773606  | 0.02953616 | 3.02551603  |     |
| UNQ6490   | -0.37772055 | 0.02953616 | -3.02537112 |     |
| YY2       | -0.37769320 | 0.02953616 | -3.02511564 |     |
| LOC728450 | -0.37770001 | 0.02953616 | -3.02517923 |     |
| ZNF146    | 0.37771193  | 0.02953616 | 3.02529063  |     |
| ADAM12    | -0.37776547 | 0.02953616 | -3.02579084 |     |
| HAND1     | -0.37775101 | 0.02953616 | -3.02565568 |     |
| MATN1     | -0.37767514 | 0.02953858 | -3.02494689 |     |
| BEND6     | -0.37759938 | 0.02958607 | -3.02423921 |     |
| TFAP2B    | -0.37757630 | 0.02959242 | -3.02402358 |     |
| CDH16     | -0.37755358 | 0.02959849 | -3.02381142 |     |
| OR52K2    | -0.37751067 | 0.02962037 | -3.02341060 |     |
| SLC2A7    | -0.37747044 | 0.02964015 | -3.02303493 |     |
| IRAK3     | 0.37740683  | 0.02964350 | 3.02244087  |     |
| TMPRSS6   | -0.37739154 | 0.02964350 | -3.02229807 |     |
| LCE2C     | -0.37740245 | 0.02964350 | -3.02239995 |     |
| CNOT2     | 0.37743207  | 0.02964350 | 3.02267658  |     |
| SOAT2     | -0.37744484 | 0.02964350 | -3.02279578 |     |
| NPY1R     | -0.37736987 | 0.02964879 | -3.02209565 |     |
| GPHA2     | -0.37727177 | 0.02966254 | -3.02117967 |     |
| SNORD57   | -0.37726295 | 0.02966254 | -3.02109734 |     |
| RPS12P23  | -0.37729859 | 0.02966254 | -3.02143006 |     |
| APOC2     | -0.37728064 | 0.02966254 | -3.02126247 |     |
| FSCB      | -0.37731540 | 0.02966254 | -3.02158703 |     |
| CLOCK     | 0.37729872  | 0.02966254 | 3.02143130  |     |
| C3orf43   | -0.37716865 | 0.02969643 | -3.02021693 |     |
| SERPINC1  | -0.37718913 | 0.02969643 | -3.02040810 |     |

|             |             |            |             |     |
|-------------|-------------|------------|-------------|-----|
| NAGA        | 0.37716045  | 0.02969643 | 3.02014036  |     |
| UGDH        | 0.37716021  | 0.02969643 | 3.02013810  |     |
| CTNND2      | -0.37712949 | 0.02970886 | -3.01985132 |     |
| LYPLA1      | 0.37695185  | 0.02976761 | 3.01819324  |     |
| MAP3K2      | 0.37703808  | 0.02976761 | 3.01899806  |     |
| ZNF543      | 0.37694408  | 0.02976761 | 3.01812068  |     |
| NOTUM       | -0.37693637 | 0.02976761 | -3.01804873 |     |
| GRM3        | -0.37692107 | 0.02976761 | -3.01790599 |     |
| C19orf35    | -0.37696147 | 0.02976761 | -3.01828306 |     |
| TMX3        | 0.37701101  | 0.02976761 | 3.01874542  |     |
| CBLN3       | -0.37692638 | 0.02976761 | -3.01795549 |     |
| ECEL1       | -0.37692906 | 0.02976761 | -3.01798057 |     |
| OR9I1       | -0.37685698 | 0.02977781 | -3.01730786 |     |
| RGAG4       | -0.37684887 | 0.02977781 | -3.01723216 |     |
| DOK5        | -0.37686106 | 0.02977781 | -3.01734597 |     |
| IMMP2L      | 0.37685604  | 0.02977781 | 3.01729907  |     |
| XPO1        | 0.37682522  | 0.02978476 | 3.01701151  |     |
| CUGBP1      | 0.37679883  | 0.02979387 | 3.01676529  |     |
| MYO16       | -0.37674502 | 0.02979465 | -3.01626316 |     |
| GAMT        | -0.37673875 | 0.02979465 | -3.01620463 |     |
| FYTTD1      | 0.37675755  | 0.02979465 | 3.01638008  | yes |
| RSPRY1      | 0.37676357  | 0.02979465 | 3.01643626  |     |
| MARCH5      | 0.37671471  | 0.02980193 | 3.01598040  |     |
| TMEM203     | 0.37668990  | 0.02980983 | 3.01574886  |     |
| NCRNA00085  | -0.37660483 | 0.02983032 | -3.01495527 |     |
| EIF2B1      | 0.37663616  | 0.02983032 | 3.01524753  |     |
| FBXO4       | 0.37660974  | 0.02983032 | 3.01500105  |     |
| LOC730241   | -0.37661878 | 0.02983032 | -3.01508535 |     |
| PFKFB2      | 0.37656514  | 0.02984994 | 3.01458495  |     |
| C7orf11     | 0.37650628  | 0.02987307 | 3.01403594  |     |
| ABTB2       | -0.37651838 | 0.02987307 | -3.01414883 |     |
| NGLY1       | 0.37648652  | 0.02987703 | 3.01385160  |     |
| HTN1        | -0.37645237 | 0.02989232 | -3.01353312 |     |
| C2orf51     | -0.37640367 | 0.02991907 | -3.01307895 |     |
| RPS27P13    | -0.37636264 | 0.02992285 | -3.01269627 |     |
| BCL2L11     | 0.37632540  | 0.02992285 | 3.01234895  |     |
| CSNK1G3     | 0.37633308  | 0.02992285 | 3.01242063  |     |
| MORC3       | 0.37637445  | 0.02992285 | 3.01280641  |     |
| CWF19L1     | 0.37633931  | 0.02992285 | 3.01247870  |     |
| LOC139431   | -0.37619423 | 0.03001469 | -3.01112588 |     |
| GTF2I       | 0.37616794  | 0.03002386 | 3.01088075  |     |
| ATP5S       | 0.37613029  | 0.03002625 | 3.01052976  |     |
| SNORD114-26 | -0.37612088 | 0.03002625 | -3.01044208 |     |
| MGC16121    | -0.37613020 | 0.03002625 | -3.01052895 |     |
| HARS        | 0.37608788  | 0.03004074 | 3.01013442  |     |
| NRK         | -0.37606155 | 0.03004667 | -3.00988895 |     |
| ARFIP1      | 0.37603641  | 0.03004667 | 3.00965463  |     |
| SRD5A3      | 0.37603881  | 0.03004667 | 3.00967696  |     |
| LOC401097   | -0.37596202 | 0.03008391 | -3.00896115 | yes |
| ERGIC2      | 0.37596001  | 0.03008391 | 3.00894247  |     |

|           |             |            |             |     |
|-----------|-------------|------------|-------------|-----|
| CLEC4GP1  | -0.37594365 | 0.03008527 | -3.00879000 |     |
| SLC3A1    | -0.37592691 | 0.03008694 | -3.00863394 |     |
| ZNF24     | 0.37589037  | 0.03010427 | 3.00829341  |     |
| C20orf118 | -0.37587188 | 0.03010733 | -3.00812104 |     |
| IL22RA2   | -0.37577020 | 0.03010811 | -3.00717351 |     |
| SARDH     | -0.37582903 | 0.03010811 | -3.00772174 |     |
| DSCR10    | -0.37572495 | 0.03010811 | -3.00675179 |     |
| C17orf102 | -0.37573910 | 0.03010811 | -3.00688365 |     |
| UBL3      | 0.37576698  | 0.03010811 | 3.00714344  | yes |
| TMEM19    | 0.37576475  | 0.03010811 | 3.00712273  |     |
| C7orf44   | 0.37573361  | 0.03010811 | 3.00683253  |     |
| PTPRK     | 0.37584712  | 0.03010811 | 3.00789030  |     |
| SI        | -0.37580883 | 0.03010811 | -3.00753344 |     |
| TOMM20    | 0.37579454  | 0.03010811 | 3.00740028  |     |
| GSTP1     | 0.37569364  | 0.03010983 | 3.00646006  |     |
| RPL23AP32 | -0.37570192 | 0.03010983 | -3.00653720 |     |
| ATP8B3    | -0.37563971 | 0.03011342 | -3.00595760 |     |
| ZNF385B   | -0.37565826 | 0.03011342 | -3.00613042 |     |
| GJD4      | -0.37562381 | 0.03011342 | -3.00580947 |     |
| NR5A1     | -0.37561636 | 0.03011342 | -3.00574003 |     |
| TSC22D2   | -0.37566406 | 0.03011342 | -3.00618447 |     |
| RASGRP1   | 0.37553952  | 0.03013393 | 3.00502420  |     |
| SNORD83B  | -0.37554124 | 0.03013393 | -3.00504023 |     |
| PEX5L     | -0.37553232 | 0.03013393 | -3.00495713 |     |
| CASP3     | 0.37556970  | 0.03013393 | 3.00530539  |     |
| S100A7L2  | -0.37551068 | 0.03013956 | -3.00475556 |     |
| LPO       | -0.37544854 | 0.03016948 | -3.00417677 |     |
| RTKN      | -0.37544386 | 0.03016948 | -3.00413312 |     |
| DDI2      | 0.37540412  | 0.03018946 | 3.00376300  |     |
| GPR176    | -0.37533880 | 0.03022974 | -3.00315466 |     |
| NXT2      | 0.37528299  | 0.03026252 | 3.00263484  | yes |
| PLEKHG1   | 0.37523970  | 0.03028539 | 3.00223174  |     |
| H1FOO     | -0.37520277 | 0.03029406 | -3.00188781 |     |
| FBXL16    | -0.37519980 | 0.03029406 | -3.00186022 |     |
| ARNTL2    | 0.37513847  | 0.03031979 | 3.00128916  |     |
| RXRG      | -0.37514613 | 0.03031979 | -3.00136044 |     |
| SNORD80   | 0.37511623  | 0.03032596 | 3.00108212  |     |
| FLJ45831  | -0.37505822 | 0.03034909 | -3.00054201 |     |
| ZNF581    | -0.37505882 | 0.03034909 | -3.00054760 |     |
| SLC6A18   | -0.37501231 | 0.03037412 | -3.00011455 |     |
| REBP      | -0.37497763 | 0.03039022 | -2.99979174 |     |
| RPL27P8   | -0.37490980 | 0.03042123 | -2.99916034 |     |
| ANUBL1    | 0.37491803  | 0.03042123 | 2.99923696  |     |
| KCNK7     | -0.37479075 | 0.03043561 | -2.99805234 |     |
| FMOD      | -0.37479559 | 0.03043561 | -2.99809740 |     |
| RAB26     | -0.37482019 | 0.03043561 | -2.99832632 |     |
| TES       | 0.37480951  | 0.03043561 | 2.99822695  |     |
| LOC346329 | -0.37485330 | 0.03043561 | -2.99863445 |     |
| RPL36P14  | -0.37483961 | 0.03043561 | -2.99850707 |     |
| ITGA2B    | -0.37481464 | 0.03043561 | -2.99827464 |     |

|               |             |            |             |     |
|---------------|-------------|------------|-------------|-----|
| RHBDD1        | 0.37476621  | 0.03044368 | 2.99782400  |     |
| SLC27A5       | -0.37467833 | 0.03045072 | -2.99700618 |     |
| OR4K13        | -0.37470878 | 0.03045072 | -2.99728952 |     |
| C1orf103      | 0.37468470  | 0.03045072 | 2.99706543  |     |
| SPAST         | 0.37469491  | 0.03045072 | 2.99716047  |     |
| FAM118B       | 0.37467421  | 0.03045072 | 2.99696787  |     |
| B4GALT4       | 0.37467101  | 0.03045072 | 2.99693805  |     |
| FTCD          | -0.37461204 | 0.03047482 | -2.99638933 |     |
| ZNF770        | 0.37461638  | 0.03047482 | 2.99642977  |     |
| LOC100130503  | -0.37453918 | 0.03048664 | -2.99571144 |     |
| SP8           | -0.37451565 | 0.03048664 | -2.99549254 |     |
| PYGO1         | -0.37455883 | 0.03048664 | -2.99589429 |     |
| OR5L2         | -0.37451107 | 0.03048664 | -2.99544997 |     |
| RPS18P12      | -0.37453739 | 0.03048664 | -2.99569479 |     |
| SLC43A1       | -0.37457269 | 0.03048664 | -2.99602325 |     |
| TMED5         | 0.37448700  | 0.03049440 | 2.99522600  |     |
| RP11-429E11.3 | -0.37432413 | 0.03049480 | -2.99371102 |     |
| HBCBP         | -0.37424797 | 0.03049480 | -2.99300273 |     |
| ATE1          | 0.37443527  | 0.03049480 | 2.99474482  |     |
| ZNF497        | -0.37433250 | 0.03049480 | -2.99378887 |     |
| C9orf141      | -0.37430037 | 0.03049480 | -2.99349003 |     |
| RRAS2         | -0.37421487 | 0.03049480 | -2.99269491 |     |
| CAMTA2        | -0.37438065 | 0.03049480 | -2.99423671 |     |
| PYY2          | -0.37428545 | 0.03049480 | -2.99335127 |     |
| STOML2        | 0.37445109  | 0.03049480 | 2.99489200  |     |
| KCNK3         | -0.37421745 | 0.03049480 | -2.99271890 |     |
| LBP           | -0.37432133 | 0.03049480 | -2.99368504 |     |
| HERV-FRD      | -0.37426325 | 0.03049480 | -2.99314484 |     |
| ME2           | 0.37423928  | 0.03049480 | 2.99292193  |     |
| LOC440311     | -0.37423282 | 0.03049480 | -2.99286180 |     |
| PLXNB3        | -0.37442017 | 0.03049480 | -2.99460434 | yes |
| RBM23         | 0.37424009  | 0.03049480 | 2.99292941  |     |
| PTPRN         | -0.37424628 | 0.03049480 | -2.99298698 |     |
| NF-E4         | -0.37439612 | 0.03049480 | -2.99438066 |     |
| LOC84856      | -0.37446835 | 0.03049480 | -2.99505254 |     |
| HDAC1         | 0.37419802  | 0.03049688 | 2.99253819  |     |
| TERF2IP       | 0.37412164  | 0.03054645 | 2.99182800  |     |
| KCNG1         | -0.37410475 | 0.03054856 | -2.99167095 |     |
| C1orf2        | -0.37399621 | 0.03055572 | -2.99066180 |     |
| PADI2         | -0.37399791 | 0.03055572 | -2.99067759 |     |
| OR1N1         | -0.37407175 | 0.03055572 | -2.99136403 |     |
| NANOS2        | -0.37401391 | 0.03055572 | -2.99082634 |     |
| SLC35E4       | -0.37406196 | 0.03055572 | -2.99127309 |     |
| INHBA         | -0.37401265 | 0.03055572 | -2.99081457 |     |
| PRAM1         | -0.37403528 | 0.03055572 | -2.99102499 |     |
| LOC100128550  | -0.37389693 | 0.03062371 | -2.98973880 |     |
| RAB11FIP5     | -0.37385230 | 0.03062553 | -2.98932398 |     |
| MUSTN1        | -0.37385204 | 0.03062553 | -2.98932157 |     |
| LRRC26        | -0.37387316 | 0.03062553 | -2.98951785 |     |
| SFRS9         | 0.37382291  | 0.03063749 | 2.98905080  |     |

|           |             |            |             |     |
|-----------|-------------|------------|-------------|-----|
| SHISA4    | -0.37371335 | 0.03064576 | -2.98803257 |     |
| KANK4     | -0.37372364 | 0.03064576 | -2.98812814 |     |
| GCNT1     | 0.37375563  | 0.03064576 | 2.98842545  |     |
| BSX       | -0.37373036 | 0.03064576 | -2.98819060 |     |
| NMB       | -0.37372420 | 0.03064576 | -2.98813336 |     |
| SAPS3     | 0.37371902  | 0.03064576 | 2.98808521  | yes |
| XPNPEP1   | 0.37379532  | 0.03064576 | 2.98879437  |     |
| CETN1     | -0.37358177 | 0.03064934 | -2.98680980 |     |
| ZFP92     | -0.37366581 | 0.03064934 | -2.98759074 |     |
| GALK2     | 0.37365975  | 0.03064934 | 2.98753441  |     |
| FLJ43093  | -0.37357698 | 0.03064934 | -2.98676532 |     |
| PGGT1B    | 0.37367004  | 0.03064934 | 2.98763001  |     |
| NT5M      | -0.37357088 | 0.03064934 | -2.98670860 |     |
| HCN2      | -0.37362345 | 0.03064934 | -2.98719707 |     |
| C7orf25   | 0.37356754  | 0.03064934 | 2.98667755  |     |
| KALRN     | -0.37360483 | 0.03064934 | -2.98702409 |     |
| FRMPD4    | -0.37364811 | 0.03064934 | -2.98742623 |     |
| ZNF776    | 0.37350769  | 0.03068593 | 2.98612151  |     |
| FOXD3     | -0.37346730 | 0.03070698 | -2.98574628 |     |
| COL8A1    | -0.37331916 | 0.03072410 | -2.98437011 |     |
| CRYGA     | -0.37337675 | 0.03072410 | -2.98490507 |     |
| ECH1      | 0.37343094  | 0.03072410 | 2.98540847  |     |
| OR1S1     | -0.37333374 | 0.03072410 | -2.98450550 |     |
| PSMA2     | 0.37334540  | 0.03072410 | 2.98461382  |     |
| TACR3     | -0.37337126 | 0.03072410 | -2.98485408 |     |
| BTN1A1    | -0.37340658 | 0.03072410 | -2.98518210 |     |
| TYRP1     | -0.37340325 | 0.03072410 | -2.98515118 |     |
| PABPC4    | 0.37332162  | 0.03072410 | 2.98439289  |     |
| CYLC2     | -0.37323705 | 0.03074572 | -2.98360744 |     |
| CHIA      | -0.37322504 | 0.03074572 | -2.98349584 |     |
| ASCC1     | 0.37324097  | 0.03074572 | 2.98364383  | yes |
| FLJ10490  | -0.37322190 | 0.03074572 | -2.98346676 |     |
| ZNF264    | 0.37326447  | 0.03074572 | 2.98386205  |     |
| CEBPE     | -0.37320601 | 0.03074720 | -2.98331915 |     |
| PSORS1C2  | -0.37315795 | 0.03076323 | -2.98287280 |     |
| CREB3L3   | -0.37316931 | 0.03076323 | -2.98297828 |     |
| CRHBP     | -0.37311031 | 0.03078417 | -2.98243036 | yes |
| FAM46D    | -0.37310377 | 0.03078417 | -2.98236965 |     |
| HINT1     | 0.37305299  | 0.03081367 | 2.98189810  |     |
| C14orf156 | 0.37302341  | 0.03082616 | 2.98162346  |     |
| LRRC37B   | 0.37300089  | 0.03083299 | 2.98141436  |     |
| ZCCHC3    | -0.37297709 | 0.03084085 | -2.98119341 |     |
| OR8H1     | -0.37294051 | 0.03085899 | -2.98085379 |     |
| KBTBD5    | -0.37288052 | 0.03088471 | -2.98029683 |     |
| MRPS18C   | 0.37288230  | 0.03088471 | 2.98031338  |     |
| METTL4    | 0.37285371  | 0.03089501 | 2.98004801  |     |
| UNQ6493   | -0.37263730 | 0.03092460 | -2.97803931 |     |
| CD300LD   | -0.37276663 | 0.03092460 | -2.97923967 |     |
| ADAM10    | 0.37264936  | 0.03092460 | 2.97815118  |     |
| ZNF524    | -0.37269458 | 0.03092460 | -2.97857092 |     |

|              |             |            |             |     |
|--------------|-------------|------------|-------------|-----|
| SORCS3       | -0.37263539 | 0.03092460 | -2.97802153 |     |
| ASPG         | -0.37265391 | 0.03092460 | -2.97819344 |     |
| C10orf113    | 0.37269355  | 0.03092460 | 2.97856132  |     |
| PAEP         | -0.37272612 | 0.03092460 | -2.97886368 |     |
| TFDP3        | -0.37272540 | 0.03092460 | -2.97885698 |     |
| TRAPPC2      | 0.37264939  | 0.03092460 | 2.97815148  |     |
| SLC2A5       | -0.37275607 | 0.03092460 | -2.97914160 |     |
| C7orf64      | 0.37273255  | 0.03092460 | 2.97892327  |     |
| SPPL2A       | 0.37278847  | 0.03092460 | 2.97944232  |     |
| CLUL1        | -0.37259452 | 0.03093720 | -2.97764224 |     |
| HOXC9        | -0.37259187 | 0.03093720 | -2.97761770 |     |
| LCLAT1       | 0.37253588  | 0.03095985 | 2.97709815  |     |
| MRPL47       | 0.37253892  | 0.03095985 | 2.97712634  |     |
| SHC2         | -0.37249130 | 0.03097334 | -2.97668448 |     |
| IGDCC4       | -0.37250511 | 0.03097334 | -2.97681266 |     |
| COL2A1       | -0.37246732 | 0.03098145 | -2.97646194 |     |
| THUMPD2      | 0.37239289  | 0.03102457 | 2.97577138  |     |
| SYCE1        | -0.37238601 | 0.03102457 | -2.97570761 |     |
| NARG1        | 0.37236410  | 0.03103103 | 2.97550435  |     |
| HNRNPA1L2    | 0.37227547  | 0.03106893 | 2.97468215  |     |
| OTUD7A       | -0.37229616 | 0.03106893 | -2.97487406 |     |
| LOC729756    | -0.37228457 | 0.03106893 | -2.97476658 |     |
| WDR75        | 0.37221481  | 0.03110671 | 2.97411948  |     |
| TTL8         | -0.37216876 | 0.03112150 | -2.97369238 |     |
| MAGEE1       | -0.37217898 | 0.03112150 | -2.97378712 |     |
| ANKRD43      | -0.37214913 | 0.03112615 | -2.97351033 |     |
| FADS3        | -0.37209406 | 0.03113705 | -2.97299956 | yes |
| KLK15        | -0.37210053 | 0.03113705 | -2.97305954 |     |
| MAPK11       | -0.37209809 | 0.03113705 | -2.97303694 | yes |
| ANKRD7       | -0.37206617 | 0.03114840 | -2.97274090 |     |
| LOC100129940 | -0.37204761 | 0.03115221 | -2.97256875 |     |
| ABCD1        | -0.37201490 | 0.03116747 | -2.97226548 |     |
| GJA4         | -0.37199829 | 0.03116970 | -2.97211146 |     |
| RESP18       | -0.37196686 | 0.03118394 | -2.97182005 |     |
| CAND2        | -0.37186089 | 0.03120878 | -2.97083745 |     |
| KRT84        | -0.37190003 | 0.03120878 | -2.97120036 |     |
| ATP6V1G2     | -0.37185625 | 0.03120878 | -2.97079445 |     |
| MKL1         | -0.37185322 | 0.03120878 | -2.97076638 |     |
| SRF          | -0.37191522 | 0.03120878 | -2.97134120 |     |
| MAP4K3       | 0.37187917  | 0.03120878 | 2.97100691  |     |
| RSPO2        | -0.37182935 | 0.03121693 | -2.97054509 |     |
| LOC339483    | -0.37181093 | 0.03122067 | -2.97037431 |     |
| EYA4         | 0.37176478  | 0.03123570 | 2.96994647  |     |
| RIOK2        | 0.37177568  | 0.03123570 | 2.97004750  |     |
| HOXA10       | -0.37170338 | 0.03127429 | -2.96937735 |     |
| C5orf47      | -0.37163680 | 0.03128634 | -2.96876019 |     |
| DLD          | 0.37163772  | 0.03128634 | 2.96876874  |     |
| LASS6        | 0.37162808  | 0.03128634 | 2.96867938  | yes |
| KRTAP12-4    | -0.37163133 | 0.03128634 | -2.96870952 |     |
| C1orf130     | -0.37161961 | 0.03128634 | -2.96860091 |     |

|           |             |            |             |     |
|-----------|-------------|------------|-------------|-----|
| NTNG1     | -0.37158699 | 0.03129259 | -2.96829855 |     |
| RGSL1     | -0.37158436 | 0.03129259 | -2.96827422 |     |
| UBE2U     | -0.37148653 | 0.03131990 | -2.96736757 |     |
| HOXB2     | -0.37151797 | 0.03131990 | -2.96765895 |     |
| C6orf174  | -0.37153190 | 0.03131990 | -2.96778801 |     |
| FANCL     | 0.37146819  | 0.03131990 | 2.96719760  |     |
| TRPC2     | -0.37147130 | 0.03131990 | -2.96722646 |     |
| BZW1      | 0.37149814  | 0.03131990 | 2.96747517  |     |
| SYCE2     | -0.37141751 | 0.03133874 | -2.96672804 |     |
| AGPS      | 0.37142256  | 0.03133874 | 2.96677478  |     |
| C1orf216  | -0.37135511 | 0.03137829 | -2.96614987 |     |
| GLP2R     | -0.37133368 | 0.03138455 | -2.96595133 |     |
| APPBP2    | 0.37126873  | 0.03138466 | 2.96534960  |     |
| PRDM4     | 0.37114177  | 0.03138466 | 2.96417348  | yes |
| ZNF480    | 0.37130281  | 0.03138466 | 2.96566536  |     |
| LOC255374 | -0.37119561 | 0.03138466 | -2.96467228 |     |
| ZNF326    | 0.37115744  | 0.03138466 | 2.96431870  |     |
| FAM47C    | -0.37119798 | 0.03138466 | -2.96469419 |     |
| ATP7B     | 0.37129576  | 0.03138466 | 2.96559997  |     |
| RINT1     | 0.37121810  | 0.03138466 | 2.96488056  |     |
| THRSP     | -0.37115948 | 0.03138466 | -2.96433758 |     |
| C16orf52  | 0.37120614  | 0.03138466 | 2.96476976  |     |
| ADAMTS12  | -0.37114193 | 0.03138466 | -2.96417497 |     |
| KRTAP9-3  | -0.37127177 | 0.03138466 | -2.96537777 |     |
| MKI67IP   | 0.37122139  | 0.03138466 | 2.96491106  |     |
| KISS1R    | -0.37124343 | 0.03138466 | -2.96511523 |     |
| PLBD1     | 0.37109142  | 0.03140337 | 2.96370717  |     |
| SIGLEC10  | -0.37110203 | 0.03140337 | -2.96380548 |     |
| CELP      | -0.37101895 | 0.03141790 | -2.96303595 |     |
| GPSM1     | -0.37104334 | 0.03141790 | -2.96326188 |     |
| NKX1-2    | -0.37103206 | 0.03141790 | -2.96315737 |     |
| PSMA6     | 0.37103143  | 0.03141790 | 2.96315156  |     |
| DICER1    | 0.37099081  | 0.03141859 | 2.96277539  |     |
| PRM1      | -0.37100153 | 0.03141859 | -2.96287470 |     |
| EFS       | -0.37089997 | 0.03147804 | -2.96193420 |     |
| ARID2     | 0.37088086  | 0.03147804 | 2.96175723  | yes |
| PPEF2     | -0.37087688 | 0.03147804 | -2.96172042 |     |
| KLHDC10   | 0.37080692  | 0.03152395 | 2.96107267  | yes |
| PEX3      | 0.37073575  | 0.03157091 | 2.96041377  |     |
| TTC39C    | 0.37069025  | 0.03159695 | 2.95999258  | yes |
| ZMPSTE24  | 0.37062950  | 0.03160210 | 2.95943022  |     |
| DDX52     | 0.37064035  | 0.03160210 | 2.95953061  |     |
| TMEM50A   | 0.37064025  | 0.03160210 | 2.95952971  |     |
| RAPGEF6   | 0.37065687  | 0.03160210 | 2.95968358  |     |
| BIRC8     | -0.37053665 | 0.03166691 | -2.95857083 |     |
| NDUFB6    | 0.37047565  | 0.03168346 | 2.95800620  |     |
| PLAC8     | 0.37048690  | 0.03168346 | 2.95811034  | yes |
| VTA1      | 0.37049136  | 0.03168346 | 2.95815160  | yes |
| CCT2      | 0.37040253  | 0.03170190 | 2.95732960  |     |
| C20orf201 | -0.37038988 | 0.03170190 | -2.95721254 |     |



|              |             |            |             |     |
|--------------|-------------|------------|-------------|-----|
| ANO7         | -0.37038523 | 0.03170190 | -2.95716948 |     |
| CASS4        | -0.37039226 | 0.03170190 | -2.95723451 |     |
| FUBP1        | 0.37042525  | 0.03170190 | 2.95753982  |     |
| TMEM160      | -0.37036389 | 0.03170826 | -2.95697202 |     |
| SLC19A1      | -0.37034377 | 0.03171364 | -2.95678580 |     |
| OR9G4        | -0.37027199 | 0.03173913 | -2.95612168 |     |
| TNR          | -0.37028659 | 0.03173913 | -2.95625675 |     |
| CHST10       | -0.37028081 | 0.03173913 | -2.95620334 | yes |
| SCFD1        | 0.37024220  | 0.03174134 | 2.95584605  |     |
| MRPL34       | -0.37024763 | 0.03174134 | -2.95589629 |     |
| RNF139       | 0.37020676  | 0.03174760 | 2.95551819  |     |
| ADAMTS15     | -0.37019804 | 0.03174760 | -2.95543756 |     |
| FANCF        | 0.37019394  | 0.03174760 | 2.95539961  | yes |
| COL22A1      | -0.37012822 | 0.03177039 | -2.95479167 |     |
| MYOD1        | -0.37014434 | 0.03177039 | -2.95494079 |     |
| FZD8         | -0.37012557 | 0.03177039 | -2.95476714 |     |
| HBS1L        | 0.37010597  | 0.03177538 | 2.95458580  |     |
| BSND         | -0.37007689 | 0.03178815 | -2.95431686 |     |
| CLEC4D       | -0.37004869 | 0.03180020 | -2.95405604 |     |
| LCN9         | -0.37002333 | 0.03180993 | -2.95382144 |     |
| OR4C3        | -0.36992901 | 0.03181788 | -2.95294907 |     |
| IFNAR2       | 0.36992527  | 0.03181788 | 2.95291448  |     |
| FAM49B       | 0.36989764  | 0.03181788 | 2.95265897  |     |
| LOC55908     | -0.36987215 | 0.03181788 | -2.95242328 |     |
| CHST7        | -0.36995665 | 0.03181788 | -2.95320473 |     |
| MRPS14       | 0.36998432  | 0.03181788 | 2.95346059  |     |
| SEL1L        | 0.36991335  | 0.03181788 | 2.95280424  |     |
| CREB3L2      | -0.36985187 | 0.03181788 | -2.95223576 |     |
| SPIB         | -0.36985281 | 0.03181788 | -2.95224440 |     |
| BRD3         | -0.36986392 | 0.03181788 | -2.95234721 |     |
| ABHD13       | 0.36991395  | 0.03181788 | 2.95280986  |     |
| RNF7         | 0.36985748  | 0.03181788 | 2.95228762  |     |
| MED4         | 0.36982645  | 0.03182771 | 2.95200065  |     |
| SC65         | -0.36981072 | 0.03182958 | -2.95185521 |     |
| IVNS1ABP     | 0.36968836  | 0.03183393 | 2.95072387  | yes |
| TRIM9        | -0.36968123 | 0.03183393 | -2.95065800 |     |
| C3orf45      | -0.36966944 | 0.03183393 | -2.95054899 |     |
| AGER         | -0.36971687 | 0.03183393 | -2.95098750 |     |
| OR1C1        | -0.36973026 | 0.03183393 | -2.95111128 |     |
| PKLR         | -0.36963450 | 0.03183393 | -2.95022600 |     |
| C10orf18     | 0.36963093  | 0.03183393 | 2.95019298  |     |
| ACSM5        | -0.36973794 | 0.03183393 | -2.95118233 |     |
| BEGAIN       | -0.36977694 | 0.03183393 | -2.95154291 |     |
| CLRN1        | -0.36966982 | 0.03183393 | -2.95055248 |     |
| RUFY1        | 0.36963162  | 0.03183393 | 2.95019933  |     |
| LGI1         | -0.36965535 | 0.03183393 | -2.95041869 |     |
| KIAA0196     | 0.36979144  | 0.03183393 | 2.95167695  |     |
| LOC100128364 | -0.36956907 | 0.03185570 | -2.94962116 |     |
| PDIK1L       | 0.36955287  | 0.03185570 | 2.94947136  | yes |
| C14orf100    | 0.36958123  | 0.03185570 | 2.94973349  |     |

|           |             |            |             |     |
|-----------|-------------|------------|-------------|-----|
| UBB       | 0.36955085  | 0.03185570 | 2.94945270  |     |
| HHIPL1    | -0.36952572 | 0.03186535 | -2.94922040 |     |
| TMEM167A  | 0.36942920  | 0.03191452 | 2.94832828  |     |
| FBXO28    | 0.36938567  | 0.03191452 | 2.94792604  | yes |
| SLC35B3   | 0.36939065  | 0.03191452 | 2.94797204  |     |
| CCDC90B   | 0.36939311  | 0.03191452 | 2.94799482  |     |
| TM2D2     | 0.36941213  | 0.03191452 | 2.94817061  |     |
| URB2      | 0.36939910  | 0.03191452 | 2.94805013  |     |
| TRIM2     | 0.36933763  | 0.03193207 | 2.94748205  | yes |
| ALOX15B   | -0.36934203 | 0.03193207 | -2.94752276 |     |
| C10orf11  | -0.36932208 | 0.03193388 | -2.94733835 |     |
| DPCR1     | -0.36925118 | 0.03195135 | -2.94668321 |     |
| XRN2      | 0.36922852  | 0.03195135 | 2.94647386  |     |
| DTWD2     | 0.36925410  | 0.03195135 | 2.94671020  |     |
| LOC387720 | -0.36921721 | 0.03195135 | -2.94636939 |     |
| MLH1      | 0.36919420  | 0.03195135 | 2.94615680  |     |
| NOX3      | -0.36926111 | 0.03195135 | -2.94677498 |     |
| DOK3      | -0.36920081 | 0.03195135 | -2.94621784 |     |
| CHST3     | -0.36921360 | 0.03195135 | -2.94633600 |     |
| USF2      | -0.36914125 | 0.03197618 | -2.94566753 |     |
| C1orf170  | -0.36913741 | 0.03197618 | -2.94563210 |     |
| PNMA5     | -0.36902220 | 0.03200486 | -2.94456776 |     |
| GDPD4     | -0.36903438 | 0.03200486 | -2.94468030 |     |
| DEFB113   | -0.36900952 | 0.03200486 | -2.94445064 |     |
| RHBDD3    | -0.36904890 | 0.03200486 | -2.94481441 |     |
| HECTD1    | 0.36903688  | 0.03200486 | 2.94470336  | yes |
| GLP1R     | -0.36902853 | 0.03200486 | -2.94462626 |     |
| LOC390956 | -0.36908307 | 0.03200486 | -2.94513010 |     |
| PCDH10    | -0.36899420 | 0.03200654 | -2.94430909 |     |
| HOXC5     | -0.36894922 | 0.03202172 | -2.94389368 |     |
| NRG2      | -0.36895326 | 0.03202172 | -2.94393097 |     |
| PSG2      | -0.36888470 | 0.03206260 | -2.94329774 |     |
| SNAP91    | -0.36887309 | 0.03206260 | -2.94319049 |     |
| CBLB      | 0.36882380  | 0.03209232 | 2.94273530  | yes |
| CYP26C1   | -0.36872739 | 0.03215864 | -2.94184508 |     |
| OR2B3     | -0.36867723 | 0.03215864 | -2.94138189 |     |
| YBX2      | -0.36869269 | 0.03215864 | -2.94152463 |     |
| HMGCLL1   | -0.36871306 | 0.03215864 | -2.94171274 |     |
| PRPF40A   | 0.36868285  | 0.03215864 | 2.94143376  |     |
| DLEU7     | -0.36864409 | 0.03216820 | -2.94107593 |     |
| EFCAB5    | -0.36861502 | 0.03216820 | -2.94080749 |     |
| OGDHL     | -0.36861402 | 0.03216820 | -2.94079827 |     |
| CCL25     | -0.36861272 | 0.03216820 | -2.94078629 |     |
| CIB3      | -0.36846693 | 0.03219051 | -2.93944040 |     |
| COL6A2    | -0.36849758 | 0.03219051 | -2.93972332 | yes |
| EXD1      | -0.36850776 | 0.03219051 | -2.93981732 |     |
| OR4S2     | -0.36846084 | 0.03219051 | -2.93938414 |     |
| ZFR2      | -0.36845462 | 0.03219051 | -2.93932674 |     |
| KLHL20    | 0.36851839  | 0.03219051 | 2.93991545  |     |
| KCNA7     | -0.36854107 | 0.03219051 | -2.94012475 |     |

|           |             |            |             |     |
|-----------|-------------|------------|-------------|-----|
| LOC641515 | -0.36846202 | 0.03219051 | -2.93939508 |     |
| TPO       | -0.36855464 | 0.03219051 | -2.94025012 | yes |
| C15orf29  | 0.36845365  | 0.03219051 | 2.93931781  |     |
| MUC17     | -0.36842683 | 0.03220178 | -2.93907022 |     |
| DOHH      | -0.36839158 | 0.03222004 | -2.93874486 |     |
| MCCC2     | 0.36824488  | 0.03231476 | 2.93739096  |     |
| SEC16B    | -0.36823769 | 0.03231476 | -2.93732461 |     |
| SEP15     | 0.36823819  | 0.03231476 | 2.93732929  |     |
| BAZ1A     | 0.36822237  | 0.03231654 | 2.93718327  | yes |
| CDX2      | -0.36820757 | 0.03231789 | -2.93704675 |     |
| SLC25A26  | 0.36811149  | 0.03233949 | 2.93616018  |     |
| C5orf37   | 0.36801066  | 0.03233949 | 2.93522991  |     |
| PAP2D     | -0.36814446 | 0.03233949 | -2.93646441 |     |
| C11orf45  | -0.36801430 | 0.03233949 | -2.93526351 |     |
| OR4D11    | -0.36802899 | 0.03233949 | -2.93539899 |     |
| C11orf20  | -0.36803627 | 0.03233949 | -2.93546622 | yes |
| FGF22     | -0.36811244 | 0.03233949 | -2.93616894 |     |
| TAAR6     | -0.36805674 | 0.03233949 | -2.93565506 |     |
| KAAG1     | -0.36807163 | 0.03233949 | -2.93579244 |     |
| C2orf29   | 0.36809852  | 0.03233949 | 2.93604047  |     |
| TCF15     | -0.36804397 | 0.03233949 | -2.93553721 |     |
| ATP6V0D1  | 0.36813372  | 0.03233949 | 2.93636532  |     |
| LITAF     | 0.36807162  | 0.03233949 | 2.93579228  |     |
| SLC2A2    | -0.36798090 | 0.03235329 | -2.93495542 |     |
| MIB1      | 0.36792641  | 0.03235500 | 2.93445277  |     |
| MARCKSL1  | -0.36794952 | 0.03235500 | -2.93466595 |     |
| NARG2     | 0.36794189  | 0.03235500 | 2.93459555  |     |
| SP6       | -0.36793917 | 0.03235500 | -2.93457043 |     |
| ANO4      | -0.36786288 | 0.03239446 | -2.93386677 |     |
| C10orf139 | -0.36785268 | 0.03239446 | -2.93377262 |     |
| SPATA19   | -0.36783507 | 0.03239822 | -2.93361020 |     |
| KIAA1024L | -0.36781196 | 0.03240654 | -2.93339704 |     |
| PFTK2     | -0.36772647 | 0.03246672 | -2.93260869 |     |
| TMEM95    | -0.36770217 | 0.03246970 | -2.93238452 |     |
| PDLIM1    | 0.36769673  | 0.03246970 | 2.93233439  |     |
| CSHL1     | -0.36767818 | 0.03247425 | -2.93216335 |     |
| TEKT5     | -0.36762750 | 0.03249468 | -2.93169600 |     |
| KCNC1     | -0.36763412 | 0.03249468 | -2.93175707 |     |
| LYPD1     | -0.36756035 | 0.03253972 | -2.93107687 |     |
| ELAVL3    | -0.36753465 | 0.03254194 | -2.93083992 |     |
| ZNF804B   | -0.36750546 | 0.03254194 | -2.93057074 |     |
| TRIM58    | -0.36751431 | 0.03254194 | -2.93065239 |     |
| PF4       | -0.36752684 | 0.03254194 | -2.93076792 |     |
| TRAPPC6B  | 0.36749130  | 0.03254286 | 2.93044028  |     |
| TPST1     | 0.36747002  | 0.03254972 | 2.93024410  |     |
| TRIM40    | -0.36744398 | 0.03256055 | -2.93000404 |     |
| C18orf25  | 0.36739882  | 0.03256708 | 2.92958769  |     |
| AMIGO3    | -0.36739705 | 0.03256708 | -2.92957135 |     |
| KRTAP3-1  | -0.36740121 | 0.03256708 | -2.92960971 |     |
| CNDP2     | 0.36737904  | 0.03257076 | 2.92940537  |     |

|              |             |            |             |     |
|--------------|-------------|------------|-------------|-----|
| KCNK17       | -0.36736658 | 0.03257076 | -2.92929055 |     |
| LOC154872    | -0.36733790 | 0.03257894 | -2.92902617 |     |
| OR10A3       | -0.36729171 | 0.03257894 | -2.92860042 |     |
| IGSF22       | -0.36729648 | 0.03257894 | -2.92864439 |     |
| HOXC13       | -0.36729357 | 0.03257894 | -2.92861751 |     |
| SLC5A5       | -0.36732552 | 0.03257894 | -2.92891207 |     |
| CEP57        | 0.36726588  | 0.03258964 | 2.92836232  |     |
| ALDH1A2      | -0.36725116 | 0.03259107 | -2.92822669 |     |
| CLRN3        | -0.36723741 | 0.03259170 | -2.92809992 |     |
| C3orf22      | -0.36721898 | 0.03259623 | -2.92793012 |     |
| ALLC         | -0.36707535 | 0.03270535 | -2.92660649 |     |
| NFKBIL2      | -0.36705128 | 0.03271462 | -2.92638468 |     |
| EZR          | 0.36700818  | 0.03273982 | 2.92598757  | yes |
| CCPG1        | 0.36699476  | 0.03274019 | 2.92586393  |     |
| MSL1         | -0.36696968 | 0.03274552 | -2.92563291 |     |
| ASNSD1       | 0.36696243  | 0.03274552 | 2.92556614  |     |
| MYOM3        | -0.36691853 | 0.03277142 | -2.92516170 |     |
| ALS2CR11     | -0.36684245 | 0.03281962 | -2.92446082 |     |
| LRFN4        | -0.36683509 | 0.03281962 | -2.92439302 |     |
| PAX3         | -0.36680711 | 0.03283221 | -2.92413527 |     |
| PRR13        | -0.36678854 | 0.03283692 | -2.92396424 |     |
| CCL26        | -0.36676629 | 0.03284471 | -2.92375933 |     |
| GPA33        | -0.36670635 | 0.03286242 | -2.92320724 |     |
| FOXR2        | -0.36673131 | 0.03286242 | -2.92343710 |     |
| C13orf39     | -0.36671573 | 0.03286242 | -2.92329361 |     |
| C7orf45      | -0.36667742 | 0.03287584 | -2.92294075 |     |
| BEND2        | -0.36664671 | 0.03289077 | -2.92265793 |     |
| RER1         | 0.36656588  | 0.03294784 | 2.92191359  |     |
| SLC19A3      | -0.36654316 | 0.03295607 | -2.92170435 |     |
| DPYSL5       | -0.36650000 | 0.03295975 | -2.92130696 |     |
| TBL1XR1      | 0.36650119  | 0.03295975 | 2.92131793  |     |
| C12orf30     | 0.36650737  | 0.03295975 | 2.92137481  |     |
| AGAP2        | -0.36647483 | 0.03296730 | -2.92107527 |     |
| METTL6       | 0.36636233  | 0.03296730 | 2.92003950  |     |
| GNAI3        | 0.36640608  | 0.03296730 | 2.92044229  |     |
| LOC100133407 | -0.36642920 | 0.03296730 | -2.92065509 |     |
| GRIN2B       | -0.36636198 | 0.03296730 | -2.92003624 |     |
| FAM149B1     | 0.36636316  | 0.03296730 | 2.92004707  | yes |
| MYO15A       | -0.36643812 | 0.03296730 | -2.92073726 |     |
| SLC39A4      | -0.36637733 | 0.03296730 | -2.92017760 |     |
| BAI2         | -0.36636965 | 0.03296730 | -2.92010684 |     |
| RPL7A        | -0.36639326 | 0.03296730 | -2.92032424 |     |
| OR9A2        | -0.36633891 | 0.03297587 | -2.91982386 |     |
| FJX1         | -0.36621560 | 0.03301465 | -2.91868878 |     |
| HOXA11       | -0.36623194 | 0.03301465 | -2.91883924 |     |
| OR10C1       | -0.36626653 | 0.03301465 | -2.91915759 |     |
| CABP2        | -0.36622222 | 0.03301465 | -2.91874970 |     |
| TMEM111      | 0.36627293  | 0.03301465 | 2.91921651  |     |
| RAB11A       | 0.36624313  | 0.03301465 | 2.91894220  | yes |
| PADI4        | -0.36613714 | 0.03303358 | -2.91796666 |     |

|               |             |            |             |     |
|---------------|-------------|------------|-------------|-----|
| OPTC          | -0.36612885 | 0.03303358 | -2.91789040 |     |
| FAM19A3       | -0.36613915 | 0.03303358 | -2.91798522 |     |
| DNM1P34       | -0.36613172 | 0.03303358 | -2.91791677 |     |
| TMEM62        | 0.36617094  | 0.03303358 | 2.91827778  |     |
| OR8D2         | -0.36611243 | 0.03303659 | -2.91773929 |     |
| MFN1          | 0.36607166  | 0.03306012 | 2.91736410  |     |
| RCBTB1        | 0.36603261  | 0.03308223 | 2.91700470  |     |
| CLDN2         | -0.36601111 | 0.03308953 | -2.91680686 |     |
| ZDHHC19       | -0.36597709 | 0.03310741 | -2.91649378 |     |
| GOPC          | 0.36590003  | 0.03316164 | 2.91578481  |     |
| CYB5R4        | 0.36588210  | 0.03316596 | 2.91561984  |     |
| RPP14         | 0.36586564  | 0.03316903 | 2.91546836  |     |
| C7orf66       | -0.36581647 | 0.03317809 | -2.91501604 |     |
| C8orf82       | -0.36582245 | 0.03317809 | -2.91507101 | yes |
| PNO1          | 0.36584004  | 0.03317809 | 2.91523283  |     |
| VWA1          | -0.36577914 | 0.03319882 | -2.91467259 | yes |
| NDST3         | -0.36576129 | 0.03320309 | -2.91450838 |     |
| TOR1AIP2      | 0.36572763  | 0.03322060 | 2.91419882  |     |
| EPB42         | -0.36571498 | 0.03322060 | -2.91408239 |     |
| ELK1          | -0.36569470 | 0.03322473 | -2.91389583 |     |
| LMAN2L        | 0.36568451  | 0.03322473 | 2.91380214  |     |
| OSM           | -0.36565499 | 0.03323888 | -2.91353061 |     |
| C2orf57       | -0.36560042 | 0.03327426 | -2.91302870 |     |
| IGSF9B        | -0.36553919 | 0.03331532 | -2.91246564 |     |
| DUSP11        | 0.36550787  | 0.03332020 | 2.91217761  |     |
| TEAD2         | -0.36551705 | 0.03332020 | -2.91226203 |     |
| PIGN          | 0.36545814  | 0.03332988 | 2.91172027  |     |
| WDR51B        | 0.36547327  | 0.03332988 | 2.91185939  | yes |
| ZBTB41        | 0.36546812  | 0.03332988 | 2.91181208  |     |
| APOC3         | -0.36541235 | 0.03334707 | -2.91129925 |     |
| TFRC          | 0.36541318  | 0.03334707 | 2.91130683  |     |
| PSMA3         | 0.36532082  | 0.03341190 | 2.91045766  |     |
| CSRP3         | -0.36531048 | 0.03341190 | -2.91036260 |     |
| KRTAP6-1      | -0.36527723 | 0.03341324 | -2.91005691 |     |
| SP1           | 0.36529507  | 0.03341324 | 2.91022092  |     |
| LNX1          | 0.36525415  | 0.03341324 | 2.90984470  |     |
| TNFRSF10C     | -0.36526314 | 0.03341324 | -2.90992733 |     |
| C5orf30       | 0.36524517  | 0.03341324 | 2.90976220  |     |
| SMAD7         | -0.36521410 | 0.03342882 | -2.90947651 |     |
| FAM92A3       | -0.36518771 | 0.03344043 | -2.90923398 |     |
| SUSD3         | -0.36513044 | 0.03347831 | -2.90870759 |     |
| RP5-1000E10.4 | 0.36511101  | 0.03348401 | 2.90852898  |     |
| ATP11B        | 0.36508151  | 0.03349830 | 2.90825781  |     |
| ZNF140        | 0.36505639  | 0.03350885 | 2.90802692  |     |
| DAPK2         | -0.36500593 | 0.03353017 | -2.90756314 |     |
| NP            | 0.36501649  | 0.03353017 | 2.90766021  |     |
| LOC100128233  | -0.36497341 | 0.03354367 | -2.90726435 |     |
| CDKN1B        | 0.36493167  | 0.03354367 | 2.90688075  |     |
| SPTLC1        | 0.36491594  | 0.03354367 | 2.90673623  |     |
| SLC26A3       | -0.36490162 | 0.03354367 | -2.90660458 | yes |

|              |             |            |             |     |
|--------------|-------------|------------|-------------|-----|
| GKN2         | -0.36490117 | 0.03354367 | -2.90660050 |     |
| EXOSC7       | 0.36494179  | 0.03354367 | 2.90697378  |     |
| KRT79        | -0.36494401 | 0.03354367 | -2.90699412 |     |
| WISP3        | -0.36488151 | 0.03354961 | -2.90641985 |     |
| KERA         | -0.36484259 | 0.03355036 | -2.90606218 |     |
| FLJ46838     | -0.36486133 | 0.03355036 | -2.90623443 | yes |
| HEATR1       | 0.36485347  | 0.03355036 | 2.90616219  |     |
| CBLN4        | -0.36482370 | 0.03355565 | -2.90588867 |     |
| MARCH11      | -0.36473982 | 0.03361638 | -2.90511800 |     |
| SYNM         | -0.36469928 | 0.03364017 | -2.90474559 |     |
| MFSD2        | 0.36468205  | 0.03364408 | 2.90458722  |     |
| AFF3         | -0.36460315 | 0.03365743 | -2.90386251 |     |
| LECT2        | -0.36460312 | 0.03365743 | -2.90386223 |     |
| MYF5         | -0.36461116 | 0.03365743 | -2.90393603 |     |
| SPRYD5       | -0.36460643 | 0.03365743 | -2.90389265 |     |
| ZNF845       | 0.36460666  | 0.03365743 | 2.90389472  |     |
| DDX6         | 0.36455987  | 0.03366198 | 2.90346493  |     |
| SUNC1        | -0.36456305 | 0.03366198 | -2.90349416 |     |
| HSPC152      | 0.36456119  | 0.03366198 | 2.90347704  |     |
| PNPLA1       | -0.36450231 | 0.03370037 | -2.90293624 |     |
| JOSD2        | -0.36443659 | 0.03374578 | -2.90233273 |     |
| PODXL2       | -0.36439426 | 0.03375526 | -2.90194396 |     |
| ACP1         | 0.36438763  | 0.03375526 | 2.90188309  |     |
| ZNF732       | -0.36441266 | 0.03375526 | -2.90211298 |     |
| C1orf150     | -0.36437250 | 0.03375740 | -2.90174414 |     |
| COLQ         | -0.36435087 | 0.03376511 | -2.90154557 |     |
| ADAMTS20     | -0.36433549 | 0.03376749 | -2.90140429 |     |
| CRYBA2       | -0.36426803 | 0.03378518 | -2.90078486 |     |
| CPNE9        | -0.36426439 | 0.03378518 | -2.90075150 |     |
| GPR144       | -0.36427619 | 0.03378518 | -2.90085979 |     |
| COL20A1      | -0.36429671 | 0.03378518 | -2.90104821 |     |
| VPS54        | 0.36424169  | 0.03379384 | 2.90054304  |     |
| MAPK4        | -0.36422763 | 0.03379509 | -2.90041395 |     |
| LOC100130019 | 0.36420472  | 0.03380382 | 2.90020362  |     |
| SEMA4G       | -0.36419225 | 0.03380382 | -2.90008917 |     |
| HSF1         | -0.36414919 | 0.03382994 | -2.89969384 |     |
| PRKACG       | -0.36411780 | 0.03384607 | -2.89940562 |     |
| ZNF655       | 0.36408001  | 0.03386769 | 2.89905880  |     |
| FBXO22       | 0.36403606  | 0.03388126 | 2.89865530  |     |
| GPR1         | -0.36403144 | 0.03388126 | -2.89861297 |     |
| CAGE1        | -0.36402648 | 0.03388126 | -2.89856739 |     |
| AWAT1        | -0.36390124 | 0.03396869 | -2.89741793 |     |
| MARVELD1     | -0.36389959 | 0.03396869 | -2.89740281 |     |
| RPP30        | 0.36386505  | 0.03397679 | 2.89708585  |     |
| SSPO         | -0.36386718 | 0.03397679 | -2.89710533 |     |
| LRFN5        | -0.36384960 | 0.03397928 | -2.89694400 |     |
| C1orf105     | -0.36382901 | 0.03398619 | -2.89675511 |     |
| NR2E3        | -0.36379821 | 0.03399021 | -2.89647245 |     |
| SAMD11       | -0.36377929 | 0.03399021 | -2.89629887 |     |
| LCN15        | -0.36377415 | 0.03399021 | -2.89625165 |     |

|            |             |            |             |
|------------|-------------|------------|-------------|
| MAPK12     | -0.36378314 | 0.03399021 | -2.89633413 |
| ZDHHC16    | 0.36374977  | 0.03400040 | 2.89602793  |
| GJD3       | -0.36371335 | 0.03400234 | -2.89569383 |
| TAAR9      | -0.36367648 | 0.03400234 | -2.89535550 |
| RHOA       | 0.36369350  | 0.03400234 | 2.89551164  |
| OR11L1     | -0.36370170 | 0.03400234 | -2.89558695 |
| PIGH       | 0.36367235  | 0.03400234 | 2.89531764  |
| TMEM135    | 0.36368157  | 0.03400234 | 2.89540223  |
| KIAA1219   | 0.36365782  | 0.03400407 | 2.89518432  |
| PDSS2      | 0.36362372  | 0.03401189 | 2.89487146  |
| KLK4       | -0.36363487 | 0.03401189 | -2.89497376 |
| SLC13A1    | -0.36353757 | 0.03407531 | -2.89408114 |
| MRPL3      | 0.36349172  | 0.03408251 | 2.89366054  |
| OPRD1      | -0.36349428 | 0.03408251 | -2.89368408 |
| RDH8       | -0.36349302 | 0.03408251 | -2.89367245 |
| UGP2       | 0.36346243  | 0.03409699 | 2.89339194  |
| PRAGMIN    | -0.36344098 | 0.03410472 | -2.89319512 |
| RNFT1      | 0.36340398  | 0.03411509 | 2.89285578  |
| KIAA0494   | 0.36340913  | 0.03411509 | 2.89290303  |
| NCRNA00086 | -0.36339068 | 0.03411579 | -2.89273382 |
| NLRP8      | -0.36336318 | 0.03411799 | -2.89248156 |
| KLHL12     | 0.36336867  | 0.03411799 | 2.89253194  |
| ZNF267     | 0.36331211  | 0.03412977 | 2.89201329  |
| KIAA0907   | 0.36332624  | 0.03412977 | 2.89214281  |
| NXT1       | -0.36332091 | 0.03412977 | -2.89209392 |
| PSMC2      | 0.36328700  | 0.03414069 | 2.89178300  |
| C12orf53   | -0.36323620 | 0.03416783 | -2.89131713 |
| KRTAP19-6  | -0.36323064 | 0.03416783 | -2.89126617 |
| OR4C12     | -0.36314750 | 0.03420739 | -2.89050385 |
| PAIP2      | 0.36315189  | 0.03420739 | 2.89054403  |
| AKR1D1     | -0.36315501 | 0.03420739 | -2.89057269 |
| ODF3L2     | -0.36312810 | 0.03421340 | -2.89032596 |
| CBARA1     | 0.36306652  | 0.03423438 | 2.88976137  |
| C17orf77   | -0.36306997 | 0.03423438 | -2.88979304 |
| N6AMT2     | 0.36307661  | 0.03423438 | 2.88985385  |
| ZNF644     | 0.36304930  | 0.03423852 | 2.88960355  |
| C2orf78    | -0.36302072 | 0.03425249 | -2.88934147 |
| RPL28      | 0.36299725  | 0.03426204 | 2.88912638  |
| CSMD2      | -0.36296151 | 0.03428222 | -2.88879876 |
| CCDC90A    | 0.36289468  | 0.03431759 | 2.88818620  |
| SLC6A1     | -0.36288342 | 0.03431759 | -2.88808291 |
| SNRPB      | 0.36290141  | 0.03431759 | 2.88824780  |
| FGF17      | -0.36284050 | 0.03434403 | -2.88768953 |
| SIM1       | -0.36279689 | 0.03437108 | -2.88728990 |
| FADS6      | -0.36276842 | 0.03437425 | -2.88702896 |
| RIOK1      | 0.36277815  | 0.03437425 | 2.88711815  |
| VPS26A     | 0.36274179  | 0.03438660 | 2.88678495  |
| CLTC       | 0.36270278  | 0.03438712 | 2.88642745  |
| CASP14     | -0.36270180 | 0.03438712 | -2.88641843 |
| DEFB126    | -0.36269847 | 0.03438712 | -2.88638797 |



|              |             |            |             |     |
|--------------|-------------|------------|-------------|-----|
| CD164        | 0.36269161  | 0.03438712 | 2.88632513  |     |
| GABBR1       | -0.36267886 | 0.03438744 | -2.88620828 |     |
| CYBASC3      | 0.36264340  | 0.03440747 | 2.88588334  |     |
| UCP1         | -0.36258244 | 0.03444965 | -2.88532481 |     |
| RPL23AP12    | -0.36256021 | 0.03445822 | -2.88512112 |     |
| HES2         | -0.36253362 | 0.03447057 | -2.88487749 |     |
| MAST1        | -0.36250727 | 0.03448272 | -2.88463614 |     |
| HNRNPA0      | 0.36244818  | 0.03449110 | 2.88409478  |     |
| ANK3         | 0.36248126  | 0.03449110 | 2.88439777  | yes |
| SUPT4H1      | 0.36244998  | 0.03449110 | 2.88411122  |     |
| VAMP2        | -0.36245219 | 0.03449110 | -2.88413153 |     |
| ESRRA        | -0.36232933 | 0.03458381 | -2.88300613 |     |
| GTF3A        | 0.36228595  | 0.03459590 | 2.88260877  |     |
| GAL3ST3      | -0.36229284 | 0.03459590 | -2.88267193 |     |
| RFT1         | 0.36227841  | 0.03459590 | 2.88253973  |     |
| OR4K15       | -0.36226234 | 0.03459915 | -2.88239250 |     |
| TM6SF2       | -0.36212148 | 0.03471134 | -2.88110256 |     |
| COL4A3BP     | 0.36208593  | 0.03473163 | 2.88077705  |     |
| GLRX3        | 0.36207301  | 0.03473213 | 2.88065878  |     |
| PDILT        | -0.36204493 | 0.03474590 | -2.88040161 |     |
| LOC100133075 | -0.36203097 | 0.03474732 | -2.88027380 |     |
| WDR41        | 0.36200570  | 0.03475864 | 2.88004244  |     |
| TBR1         | -0.36182386 | 0.03478177 | -2.87837784 |     |
| MASP2        | -0.36183487 | 0.03478177 | -2.87847858 |     |
| IL17RE       | -0.36193288 | 0.03478177 | -2.87937580 |     |
| OR8K5        | -0.36190784 | 0.03478177 | -2.87914651 |     |
| C17orf88     | -0.36191193 | 0.03478177 | -2.87918397 |     |
| ATP2C1       | 0.36185205  | 0.03478177 | 2.87863585  |     |
| OR51V1       | -0.36183656 | 0.03478177 | -2.87849402 |     |
| YIPF1        | 0.36184561  | 0.03478177 | 2.87857688  |     |
| RBP4         | -0.36195731 | 0.03478177 | -2.87959942 |     |
| CTXN3        | -0.36189747 | 0.03478177 | -2.87905161 |     |
| LOC619207    | -0.36187366 | 0.03478177 | -2.87883364 |     |
| TROVE2       | 0.36181924  | 0.03478177 | 2.87833550  |     |
| CUL5         | 0.36190277  | 0.03478177 | 2.87910013  |     |
| FLJ20464     | -0.36180103 | 0.03478695 | -2.87816880 |     |
| RBM47        | 0.36174299  | 0.03482240 | 2.87763760  |     |
| MRPL49       | 0.36173598  | 0.03482240 | 2.87757340  |     |
| COL9A2       | -0.36170199 | 0.03484142 | -2.87726239 |     |
| LGI4         | -0.36166303 | 0.03485405 | -2.87690581 |     |
| MFGE8        | -0.36166736 | 0.03485405 | -2.87694540 |     |
| NCR1         | -0.36163528 | 0.03486762 | -2.87665182 |     |
| NRGN         | -0.36158250 | 0.03489240 | -2.87616879 | yes |
| RAB5A        | 0.36158560  | 0.03489240 | 2.87619723  |     |
| NXP2         | -0.36149344 | 0.03490874 | -2.87535391 |     |
| PLAC8L1      | -0.36149569 | 0.03490874 | -2.87537447 |     |
| TRIM65       | -0.36153481 | 0.03490874 | -2.87573249 |     |
| ERAP1        | 0.36151024  | 0.03490874 | 2.87550759  |     |
| GHDC         | -0.36149035 | 0.03490874 | -2.87532561 |     |
| BAG5         | 0.36150338  | 0.03490874 | 2.87544489  |     |

|            |             |            |             |     |
|------------|-------------|------------|-------------|-----|
| ACER3      | 0.36147658  | 0.03491007 | 2.87519967  |     |
| STK38      | 0.36144612  | 0.03491018 | 2.87492092  |     |
| TMEM65     | 0.36143976  | 0.03491018 | 2.87486272  |     |
| TCL1B      | -0.36145711 | 0.03491018 | -2.87502147 |     |
| LOC728060  | -0.36141620 | 0.03492011 | -2.87464722 |     |
| TUSC5      | -0.36138994 | 0.03493243 | -2.87440693 |     |
| CDYL2      | -0.36136557 | 0.03494310 | -2.87418398 |     |
| ITGAM      | -0.36134696 | 0.03494870 | -2.87401375 |     |
| SOCS4      | 0.36133422  | 0.03494916 | 2.87389719  |     |
| ZNF321     | 0.36131241  | 0.03495470 | 2.87369770  |     |
| KIAA0895L  | -0.36130349 | 0.03495470 | -2.87361608 |     |
| UQCC       | 0.36125172  | 0.03497519 | 2.87314258  |     |
| PTPN1      | 0.36124185  | 0.03497519 | 2.87305231  |     |
| LOC643406  | -0.36123133 | 0.03497519 | -2.87295606 |     |
| PRPF4      | 0.36126261  | 0.03497519 | 2.87324220  |     |
| XRCC5      | 0.36118691  | 0.03500350 | 2.87254981  |     |
| C2orf43    | 0.36117179  | 0.03500608 | 2.87241151  |     |
| VIL1       | -0.36114049 | 0.03501217 | -2.87212520 |     |
| HS3ST3A1   | -0.36114651 | 0.03501217 | -2.87218025 |     |
| CHAT       | -0.36110927 | 0.03502890 | -2.87183970 |     |
| STAT3      | 0.36108062  | 0.03504338 | 2.87157768  |     |
| CD300LF    | -0.36105235 | 0.03504683 | -2.87131914 |     |
| OTOR       | -0.36105969 | 0.03504683 | -2.87138628 |     |
| STAM2      | 0.36095530  | 0.03512157 | 2.87043166  | yes |
| CHCHD4     | -0.36090959 | 0.03512967 | -2.87001377 |     |
| PLEKHG4    | -0.36091673 | 0.03512967 | -2.87007904 |     |
| GOLGA7     | 0.36092200  | 0.03512967 | 2.87012726  |     |
| BPIL3      | -0.36088494 | 0.03512996 | -2.86978838 |     |
| AK3        | 0.36089273  | 0.03512996 | 2.86985960  |     |
| PGRMC1     | 0.36084026  | 0.03515164 | 2.86937986  |     |
| SHANK3     | -0.36083603 | 0.03515164 | -2.86934124 | yes |
| PAQR9      | -0.36081870 | 0.03515621 | -2.86918278 |     |
| OR6Q1      | -0.36074985 | 0.03518980 | -2.86855335 |     |
| C11orf41   | -0.36074365 | 0.03518980 | -2.86849671 |     |
| CAB39      | 0.36073204  | 0.03518980 | 2.86839056  |     |
| MED9       | -0.36075135 | 0.03518980 | -2.86856709 |     |
| RPL12P16   | 0.36069108  | 0.03521514 | 2.86801622  |     |
| PPP2R2A    | 0.36067906  | 0.03521514 | 2.86790629  |     |
| NCRNA00087 | -0.36063645 | 0.03524206 | -2.86751683 |     |
| GLOD5      | -0.36057948 | 0.03528169 | -2.86699618 |     |
| MAPK6      | 0.36055840  | 0.03528412 | 2.86680349  |     |
| TRHR       | -0.36054036 | 0.03528412 | -2.86663865 |     |
| BEST1      | -0.36054792 | 0.03528412 | -2.86670772 |     |
| HADHB      | 0.36048447  | 0.03531212 | 2.86612786  |     |
| RPL9       | 0.36049521  | 0.03531212 | 2.86622598  |     |
| IMPACT     | 0.36042760  | 0.03535175 | 2.86560818  |     |
| TANC2      | 0.36040959  | 0.03535697 | 2.86544362  |     |
| GALNT9     | -0.36038157 | 0.03537106 | -2.86518760 |     |
| ZNF816A    | 0.36033588  | 0.03539429 | 2.86477018  |     |
| SLCO1C1    | -0.36033116 | 0.03539429 | -2.86472697 |     |

|              |             |            |             |     |
|--------------|-------------|------------|-------------|-----|
| MMADHC       | 0.36028245  | 0.03542675 | 2.86428194  |     |
| LILRA1       | -0.36023265 | 0.03544947 | -2.86382699 |     |
| CACNB4       | -0.36023595 | 0.03544947 | -2.86385719 |     |
| ZNF271       | 0.36021985  | 0.03545009 | 2.86371013  |     |
| KCNJ3        | -0.36016025 | 0.03547081 | -2.86316564 |     |
| ARRDC3       | 0.36016422  | 0.03547081 | 2.86320195  |     |
| GADD45GIP1   | -0.36016741 | 0.03547081 | -2.86323109 |     |
| C19orf26     | -0.36012209 | 0.03549397 | -2.86281708 |     |
| LOC148003    | -0.36007624 | 0.03551325 | -2.86239828 |     |
| NFKB1        | 0.36008181  | 0.03551325 | 2.86244920  |     |
| SNORD81      | 0.36002063  | 0.03553050 | 2.86189036  |     |
| FLJ13224     | -0.36003666 | 0.03553050 | -2.86203683 |     |
| PPP1R1B      | -0.36002366 | 0.03553050 | -2.86191808 |     |
| CDH22        | -0.36000612 | 0.03553267 | -2.86175788 |     |
| CUX2         | -0.35998200 | 0.03553267 | -2.86153758 |     |
| WDR26        | 0.35999160  | 0.03553267 | 2.86162525  | yes |
| SFRP5        | -0.35993423 | 0.03556443 | -2.86110130 |     |
| CEACAM4      | -0.35988116 | 0.03556876 | -2.86061671 |     |
| C20orf173    | -0.35990077 | 0.03556876 | -2.86079576 |     |
| ABCB9        | -0.35991694 | 0.03556876 | -2.86094343 |     |
| COL23A1      | -0.35989162 | 0.03556876 | -2.86071225 |     |
| LOC147645    | -0.35986714 | 0.03557052 | -2.86048870 |     |
| PSMD1        | 0.35983119  | 0.03559180 | 2.86016044  |     |
| TMEM105      | -0.35980657 | 0.03559196 | -2.85993564 |     |
| SMEK1        | 0.35979492  | 0.03559196 | 2.85982923  |     |
| TMEM59       | 0.35980033  | 0.03559196 | 2.85987871  |     |
| C20orf191    | -0.35976578 | 0.03559648 | -2.85956321 |     |
| NXF4         | -0.35977772 | 0.03559648 | -2.85967226 |     |
| MS4A13       | -0.35969773 | 0.03564637 | -2.85894197 |     |
| FLJ34503     | -0.35966392 | 0.03565508 | -2.85863332 |     |
| KIRREL3      | -0.35966826 | 0.03565508 | -2.85867287 |     |
| UGT3A1       | -0.35958857 | 0.03566874 | -2.85794545 |     |
| ARC          | -0.35963453 | 0.03566874 | -2.85836502 |     |
| FRRS1        | 0.35960041  | 0.03566874 | 2.85805350  |     |
| C2orf83      | -0.35960788 | 0.03566874 | -2.85812173 |     |
| ZNF32        | 0.35961369  | 0.03566874 | 2.85817471  |     |
| GAS1         | -0.35956116 | 0.03568248 | -2.85769523 |     |
| SPINT4       | -0.35952295 | 0.03570585 | -2.85734649 |     |
| FAM20A       | -0.35950795 | 0.03570853 | -2.85720961 |     |
| LOC100129492 | 0.35944464  | 0.03575087 | 2.85663174  |     |
| SDR16C5      | 0.35942993  | 0.03575087 | 2.85649750  |     |
| PPY          | -0.35937664 | 0.03575087 | -2.85601118 |     |
| S100B        | -0.35941918 | 0.03575087 | -2.85639941 |     |
| CCL17        | -0.35941141 | 0.03575087 | -2.85632846 |     |
| C10orf119    | 0.35938518  | 0.03575087 | 2.85608912  |     |
| C9orf100     | -0.35939764 | 0.03575087 | -2.85620280 |     |
| SAP18        | 0.35923025  | 0.03577716 | 2.85467536  |     |
| SOX30        | -0.35923444 | 0.03577716 | -2.85471362 |     |
| CXorf55      | -0.35922172 | 0.03577716 | -2.85459755 |     |
| SEZ6L        | -0.35922153 | 0.03577716 | -2.85459583 |     |

|           |             |            |             |     |
|-----------|-------------|------------|-------------|-----|
| TBPL2     | -0.35919182 | 0.03577716 | -2.85432479 |     |
| GLTPD2    | -0.35933424 | 0.03577716 | -2.85562424 |     |
| MOCS1     | -0.35920698 | 0.03577716 | -2.85446305 |     |
| MYT1      | -0.35921170 | 0.03577716 | -2.85450611 |     |
| NLK       | 0.35919808  | 0.03577716 | 2.85438185  |     |
| TRO       | -0.35920739 | 0.03577716 | -2.85446678 |     |
| AFAP1L2   | -0.35919430 | 0.03577716 | -2.85434741 |     |
| MYO18B    | -0.35927911 | 0.03577716 | -2.85512117 |     |
| SLC22A6   | -0.35929798 | 0.03577716 | -2.85529340 |     |
| CSPG5     | -0.35916996 | 0.03578603 | -2.85412531 |     |
| CSNK1A1L  | -0.35906818 | 0.03585461 | -2.85319683 |     |
| OR8S1     | -0.35903361 | 0.03585461 | -2.85288147 |     |
| AR        | -0.35904083 | 0.03585461 | -2.85294726 |     |
| NPPB      | -0.35907867 | 0.03585461 | -2.85329249 | yes |
| C15orf44  | 0.35904022  | 0.03585461 | 2.85294176  |     |
| TBC1D28   | -0.35896777 | 0.03590005 | -2.85228084 |     |
| C3orf10   | 0.35895900  | 0.03590005 | 2.85220091  |     |
| SNORD32B  | -0.35892666 | 0.03591835 | -2.85190594 |     |
| PHACTR1   | -0.35888580 | 0.03592296 | -2.85153327 |     |
| GNRH2     | -0.35889426 | 0.03592296 | -2.85161045 |     |
| LCE3C     | -0.35889805 | 0.03592296 | -2.85164496 |     |
| CCNJL     | -0.35884344 | 0.03593958 | -2.85114697 |     |
| MED21     | 0.35885208  | 0.03593958 | 2.85122576  |     |
| ENPP4     | 0.35881693  | 0.03595096 | 2.85090514  |     |
| ZDHHC21   | 0.35880697  | 0.03595096 | 2.85081431  |     |
| CXADR     | 0.35874510  | 0.03599577 | 2.85025012  |     |
| C19orf36  | -0.35853878 | 0.03607439 | -2.84836909 |     |
| DGUOK     | 0.35864121  | 0.03607439 | 2.84930285  |     |
| CCT5      | 0.35854955  | 0.03607439 | 2.84846727  |     |
| LOC389137 | 0.35862922  | 0.03607439 | 2.84919355  |     |
| PIGF      | 0.35857880  | 0.03607439 | 2.84873387  | yes |
| PRIM2     | 0.35859045  | 0.03607439 | 2.84884013  |     |
| C10orf110 | -0.35854717 | 0.03607439 | -2.84844550 |     |
| LHX5      | -0.35854137 | 0.03607439 | -2.84839271 |     |
| DAP3      | 0.35861570  | 0.03607439 | 2.84907027  | yes |
| TAAR2     | -0.35860645 | 0.03607439 | -2.84898600 |     |
| DNAH8     | -0.35849935 | 0.03607786 | -2.84800965 |     |
| OR51A4    | -0.35851810 | 0.03607786 | -2.84818050 |     |
| SLC35F5   | 0.35850095  | 0.03607786 | 2.84802418  |     |
| CTNNA2    | -0.35848583 | 0.03607937 | -2.84788635 |     |
| SNX4      | 0.35847049  | 0.03608250 | 2.84774653  |     |
| APCS      | -0.35843120 | 0.03609652 | -2.84738841 |     |
| NPHS1     | -0.35843892 | 0.03609652 | -2.84745872 |     |
| CST8      | -0.35835380 | 0.03612725 | -2.84668287 |     |
| FIGNL2    | -0.35835165 | 0.03612725 | -2.84666328 |     |
| AZGP1     | -0.35834968 | 0.03612725 | -2.84664537 |     |
| C15orf17  | 0.35837874  | 0.03612725 | 2.84691021  |     |
| NDUFB4    | 0.35832147  | 0.03614199 | 2.84638822  |     |
| ATG7      | 0.35829836  | 0.03615214 | 2.84617767  |     |
| OR2T1     | -0.35828457 | 0.03615392 | -2.84605193 |     |

|           |             |            |             |     |
|-----------|-------------|------------|-------------|-----|
| FAM180B   | -0.35817156 | 0.03622375 | -2.84502213 |     |
| TPM2      | -0.35819028 | 0.03622375 | -2.84519270 |     |
| CAPNS1    | 0.35818017  | 0.03622375 | 2.84510060  |     |
| SCGB3A2   | -0.35811605 | 0.03625250 | -2.84451629 |     |
| PPP4R2    | 0.35811873  | 0.03625250 | 2.84454075  |     |
| PSMG2     | 0.35809076  | 0.03626465 | 2.84428591  |     |
| DBC1      | -0.35804422 | 0.03629600 | -2.84386185 |     |
| CDA       | -0.35800516 | 0.03632060 | -2.84350603 |     |
| NLGN3     | -0.35796444 | 0.03634673 | -2.84313504 |     |
| PDIA6     | 0.35786163  | 0.03637753 | 2.84219856  |     |
| C10orf32  | 0.35784781  | 0.03637753 | 2.84207270  |     |
| TC2N      | 0.35788353  | 0.03637753 | 2.84239805  | yes |
| SBK1      | -0.35788453 | 0.03637753 | -2.84240712 |     |
| SFRS2     | 0.35788887  | 0.03637753 | 2.84244668  |     |
| TPD52     | 0.35787237  | 0.03637753 | 2.84229633  |     |
| ULK1      | -0.35785293 | 0.03637753 | -2.84211925 |     |
| METRN     | -0.35781032 | 0.03640079 | -2.84173117 |     |
| SESTD1    | 0.35776108  | 0.03643469 | 2.84128275  |     |
| KRT32     | -0.35774824 | 0.03643565 | -2.84116579 |     |
| GLOD4     | 0.35765688  | 0.03647057 | 2.84033374  |     |
| CD320     | -0.35763802 | 0.03647057 | -2.84016200 |     |
| CROT      | 0.35767771  | 0.03647057 | 2.84052348  |     |
| LOC643905 | -0.35769021 | 0.03647057 | -2.84063730 |     |
| TNNT1     | -0.35761991 | 0.03647057 | -2.83999710 |     |
| AKT1S1    | -0.35765644 | 0.03647057 | -2.84032977 |     |
| MCM8      | 0.35761557  | 0.03647057 | 2.83995757  |     |
| ZNF432    | 0.35761759  | 0.03647057 | 2.83997597  |     |
| FRAG1     | 0.35759881  | 0.03647511 | 2.83980497  |     |
| RTBDN     | -0.35754233 | 0.03650500 | -2.83929070 |     |
| BSN       | -0.35754643 | 0.03650500 | -2.83932801 |     |
| OXER1     | -0.35751200 | 0.03652184 | -2.83901458 |     |
| MRPL42    | 0.35749479  | 0.03652680 | 2.83885789  |     |
| CSNK1G1   | 0.35745167  | 0.03653042 | 2.83846527  |     |
| KCNK10    | -0.35744086 | 0.03653042 | -2.83836687 |     |
| FLJ40606  | -0.35742042 | 0.03653042 | -2.83818081 |     |
| TERT      | -0.35742895 | 0.03653042 | -2.83825848 |     |
| NKAIN1    | -0.35742203 | 0.03653042 | -2.83819542 |     |
| TRIM15    | -0.35743899 | 0.03653042 | -2.83834986 |     |
| GLT6D1    | -0.35740189 | 0.03653659 | -2.83801213 |     |
| MEP1A     | -0.35735473 | 0.03656874 | -2.83758282 |     |
| MAGEC3    | -0.35730586 | 0.03660248 | -2.83713791 |     |
| EXOSC6    | -0.35728648 | 0.03660944 | -2.83696151 |     |
| SYN3      | -0.35721503 | 0.03666373 | -2.83631122 |     |
| IPMK      | 0.35719459  | 0.03666955 | 2.83612517  | yes |
| FKRP      | -0.35718521 | 0.03666955 | -2.83603982 |     |
| ZNF564    | 0.35710565  | 0.03668101 | 2.83531579  |     |
| HNF4A     | -0.35710243 | 0.03668101 | -2.83528644 |     |
| FAM132A   | -0.35710566 | 0.03668101 | -2.83531585 |     |
| DUSP22    | 0.35712359  | 0.03668101 | 2.83547899  |     |
| NAT13     | 0.35712282  | 0.03668101 | 2.83547201  |     |

|          |             |            |             |     |
|----------|-------------|------------|-------------|-----|
| VPS25    | 0.35713910  | 0.03668101 | 2.83562015  |     |
| G6PC     | -0.35705101 | 0.03668337 | -2.83481858 |     |
| KCNJ13   | -0.35704287 | 0.03668337 | -2.83474450 |     |
| RGS16    | -0.35702974 | 0.03668337 | -2.83462501 |     |
| KAZALD1  | -0.35708409 | 0.03668337 | -2.83511953 |     |
| LHX2     | -0.35704945 | 0.03668337 | -2.83480434 |     |
| LRIG2    | 0.35703240  | 0.03668337 | 2.83464924  |     |
| MYCN     | -0.35700427 | 0.03669592 | -2.83439326 |     |
| SNORD4A  | 0.35691702  | 0.03676473 | 2.83359942  |     |
| SLCO1B1  | -0.35690037 | 0.03676720 | -2.83344789 |     |
| XKR8     | -0.35687932 | 0.03676720 | -2.83325641 |     |
| CHST8    | -0.35688057 | 0.03676720 | -2.83326778 |     |
| PRTG     | -0.35682425 | 0.03679648 | -2.83275543 |     |
| RPL35A   | 0.35682388  | 0.03679648 | 2.83275202  |     |
| MRPS28   | 0.35679498  | 0.03680153 | 2.83248913  |     |
| IFNB1    | -0.35675573 | 0.03680153 | -2.83213213 |     |
| COX16    | 0.35676642  | 0.03680153 | 2.83222933  |     |
| RPL3     | 0.35674845  | 0.03680153 | 2.83206591  |     |
| SCARNA11 | -0.35675602 | 0.03680153 | -2.83213473 |     |
| CA9      | -0.35678726 | 0.03680153 | -2.83241893 |     |
| ICT1     | 0.35672405  | 0.03681317 | 2.83184390  |     |
| MAK10    | 0.35670697  | 0.03681813 | 2.83168858  | yes |
| NCBP1    | 0.35666610  | 0.03684480 | 2.83131683  |     |
| LHX9     | -0.35662925 | 0.03686782 | -2.83098172 |     |
| GMEB1    | 0.35661565  | 0.03686852 | 2.83085797  |     |
| ZNF189   | 0.35660523  | 0.03686852 | 2.83076319  |     |
| FAF1     | 0.35656657  | 0.03688546 | 2.83041166  |     |
| F3       | 0.35656344  | 0.03688546 | 2.83038316  |     |
| KRT19    | 0.35652915  | 0.03690616 | 2.83007137  |     |
| CAPN11   | -0.35650862 | 0.03691430 | -2.82988470 |     |
| C2orf85  | -0.35645929 | 0.03694878 | -2.82943612 |     |
| SEZ6     | -0.35642597 | 0.03695585 | -2.82913307 |     |
| COL9A3   | -0.35640504 | 0.03695585 | -2.82894284 |     |
| ALPI     | -0.35642575 | 0.03695585 | -2.82913107 |     |
| ART4     | -0.35639757 | 0.03695585 | -2.82887487 | yes |
| PPP2CA   | 0.35639354  | 0.03695585 | 2.82883826  |     |
| C3orf52  | 0.35634839  | 0.03698654 | 2.82842770  | yes |
| CATSPER2 | 0.35628254  | 0.03702889 | 2.82782907  |     |
| GTF2H1   | 0.35627893  | 0.03702889 | 2.82779629  |     |
| TMED2    | 0.35624511  | 0.03704142 | 2.82748884  |     |
| ANXA2P2  | 0.35623574  | 0.03704142 | 2.82740361  | yes |
| ZNF517   | -0.35623050 | 0.03704142 | -2.82735594 |     |
| KATNA1   | 0.35620385  | 0.03704677 | 2.82711370  | yes |
| MKKS     | 0.35620149  | 0.03704677 | 2.82709228  |     |
| ZNF585B  | 0.35617532  | 0.03706015 | 2.82685436  |     |
| CST1     | -0.35614016 | 0.03707115 | -2.82653480 |     |
| SLC29A2  | -0.35614490 | 0.03707115 | -2.82657788 |     |
| MED26    | -0.35608881 | 0.03710763 | -2.82606803 |     |
| LYG2     | -0.35602964 | 0.03715131 | -2.82553034 |     |
| CHMP2A   | 0.35601139  | 0.03715745 | 2.82536447  |     |

|           |             |            |             |     |
|-----------|-------------|------------|-------------|-----|
| DDX20     | 0.35598123  | 0.03717238 | 2.82509036  |     |
| C20orf160 | -0.35597201 | 0.03717238 | -2.82500657 | yes |
| BCL9L     | -0.35592443 | 0.03720547 | -2.82457421 |     |
| KIAA1012  | 0.35584214  | 0.03727054 | 2.82382643  | yes |
| BET3L     | -0.35578181 | 0.03727522 | -2.82327828 |     |
| SEP12     | -0.35572163 | 0.03727522 | -2.82273154 |     |
| ARG1      | -0.35575390 | 0.03727522 | -2.82302476 |     |
| OR5T3     | -0.35578854 | 0.03727522 | -2.82333945 |     |
| MAN2A1    | 0.35573006  | 0.03727522 | 2.82280816  |     |
| PNLIPRP1  | -0.35575994 | 0.03727522 | -2.82307960 |     |
| HIF1AN    | 0.35578508  | 0.03727522 | 2.82330805  |     |
| FAM135A   | 0.35580945  | 0.03727522 | 2.82352940  |     |
| SFTP8     | -0.35573559 | 0.03727522 | -2.82285840 |     |
| C8G       | -0.35577442 | 0.03727522 | -2.82321115 |     |
| VPS29     | 0.35569475  | 0.03728935 | 2.82248734  |     |
| MMP21     | -0.35560640 | 0.03729042 | -2.82168479 |     |
| CNOT1     | 0.35560658  | 0.03729042 | 2.82168645  | yes |
| ZCCHC16   | -0.35564649 | 0.03729042 | -2.82204894 |     |
| MPP2      | -0.35565209 | 0.03729042 | -2.82209988 | yes |
| SNTG1     | -0.35561701 | 0.03729042 | -2.82178116 |     |
| TCEB1P3   | -0.35565265 | 0.03729042 | -2.82210494 |     |
| CCT6A     | 0.35560146  | 0.03729042 | 2.82163992  |     |
| S1PR2     | -0.35561283 | 0.03729042 | -2.82174320 |     |
| RNASEH1   | 0.35556047  | 0.03729639 | 2.82126762  |     |
| SLC13A5   | -0.35556223 | 0.03729639 | -2.82128362 |     |
| HCRTR2    | -0.35557821 | 0.03729639 | -2.82142873 |     |
| NOL9      | 0.35553720  | 0.03730724 | 2.82105623  |     |
| LOC552889 | 0.35547961  | 0.03733911 | 2.82053315  | yes |
| WDR12     | 0.35548396  | 0.03733911 | 2.82057266  |     |
| ACOT9     | 0.35544892  | 0.03735680 | 2.82025444  |     |
| ZNF234    | 0.35543605  | 0.03735808 | 2.82013755  |     |
| SLC29A1   | -0.35537709 | 0.03735833 | -2.81960217 |     |
| ERCC6     | 0.35535995  | 0.03735833 | 2.81944654  |     |
| CHRD12    | -0.35539826 | 0.03735833 | -2.81979439 |     |
| AMHR2     | -0.35536234 | 0.03735833 | -2.81946823 |     |
| KPNA3     | 0.35538982  | 0.03735833 | 2.81971775  |     |
| LTF       | -0.35535546 | 0.03735833 | -2.81940574 |     |
| SFMBT1    | 0.35536710  | 0.03735833 | 2.81951140  | yes |
| NBR1      | 0.35533232  | 0.03735852 | 2.81919565  |     |
| RBM4      | 0.35533494  | 0.03735852 | 2.81921940  |     |
| ASB7      | 0.35530224  | 0.03736513 | 2.81892251  |     |
| C17orf50  | -0.35530785 | 0.03736513 | -2.81897344 |     |
| STK35     | 0.35525097  | 0.03736967 | 2.81845691  |     |
| ZNF784    | -0.35527834 | 0.03736967 | -2.81870545 |     |
| RCAN1     | -0.35523963 | 0.03736967 | -2.81835394 |     |
| GCH1      | 0.35523957  | 0.03736967 | 2.81835344  |     |
| VAT1L     | -0.35524888 | 0.03736967 | -2.81843797 |     |
| SMURF2    | 0.35522865  | 0.03736967 | 2.81825431  |     |
| C14orf126 | 0.35519963  | 0.03737534 | 2.81799080  |     |
| LPPR2     | -0.35520536 | 0.03737534 | -2.81804287 |     |



|           |             |            |             |     |
|-----------|-------------|------------|-------------|-----|
| C19orf25  | -0.35516445 | 0.03737617 | -2.81767140 |     |
| KNCN      | -0.35517583 | 0.03737617 | -2.81777477 |     |
| CACNA1F   | -0.35517030 | 0.03737617 | -2.81772454 |     |
| SLC12A5   | -0.35513791 | 0.03739009 | -2.81743052 |     |
| TMEM71    | 0.35508549  | 0.03740685 | 2.81695458  |     |
| KCNB1     | -0.35509213 | 0.03740685 | -2.81701489 |     |
| TLE4      | 0.35510270  | 0.03740685 | 2.81711084  | yes |
| C1orf68   | -0.35505608 | 0.03742069 | -2.81668768 |     |
| SMG1      | 0.35504765  | 0.03742069 | 2.81661113  |     |
| SLAMF9    | -0.35502432 | 0.03743168 | -2.81639939 |     |
| FGB       | -0.35498758 | 0.03745506 | -2.81606583 |     |
| MESP1     | -0.35497450 | 0.03745660 | -2.81594718 |     |
| E2F5      | 0.35493867  | 0.03745871 | 2.81562194  |     |
| FAM163B   | -0.35493804 | 0.03745871 | -2.81561620 |     |
| T         | -0.35494969 | 0.03745871 | -2.81572198 |     |
| ARPC2     | 0.35476297  | 0.03749429 | 2.81402744  |     |
| MTF2      | 0.35481990  | 0.03749429 | 2.81454408  |     |
| CSDC2     | -0.35482235 | 0.03749429 | -2.81456630 |     |
| C10orf85  | -0.35484624 | 0.03749429 | -2.81478309 |     |
| AMDHD2    | -0.35478236 | 0.03749429 | -2.81420336 |     |
| GOLT1B    | 0.35480025  | 0.03749429 | 2.81436575  |     |
| TMCC3     | -0.35481601 | 0.03749429 | -2.81450877 |     |
| KIAA1486  | -0.35488714 | 0.03749429 | -2.81515421 |     |
| SLC2A1    | 0.35478065  | 0.03749429 | 2.81418790  |     |
| SPG11     | 0.35482755  | 0.03749429 | 2.81461342  |     |
| LZIC      | 0.35476488  | 0.03749429 | 2.81404476  |     |
| HS3ST1    | 0.35479671  | 0.03749429 | 2.81433359  |     |
| DENR      | 0.35474059  | 0.03749722 | 2.81382434  |     |
| ADAMTSL1  | -0.35473708 | 0.03749722 | -2.81379254 | yes |
| BBS5      | 0.35472514  | 0.03749776 | 2.81368418  |     |
| KCNA6     | -0.35469690 | 0.03751336 | -2.81342790 |     |
| GP2       | -0.35466554 | 0.03753184 | -2.81314334 |     |
| REV1      | 0.35461684  | 0.03756635 | 2.81270154  |     |
| PQLC2     | -0.35459148 | 0.03757931 | -2.81247144 |     |
| DMP1      | -0.35455638 | 0.03759559 | -2.81215306 |     |
| S1PR4     | -0.35455119 | 0.03759559 | -2.81210594 |     |
| RPL29P30  | -0.35453653 | 0.03759866 | -2.81197295 |     |
| HIVEP2    | 0.35450406  | 0.03760773 | 2.81167836  |     |
| BEX2      | -0.35450576 | 0.03760773 | -2.81169385 |     |
| SV2C      | -0.35447619 | 0.03761255 | -2.81142558 |     |
| C10orf120 | -0.35448598 | 0.03761255 | -2.81151440 |     |
| C2orf80   | -0.35445678 | 0.03762003 | -2.81124954 |     |
| SRRM1     | -0.35442020 | 0.03762246 | -2.81091770 |     |
| SLC22A12  | -0.35443406 | 0.03762246 | -2.81104345 |     |
| GPBP1L1   | 0.35443017  | 0.03762246 | 2.81100816  |     |
| HS6ST3    | -0.35423901 | 0.03762293 | -2.80927439 |     |
| OR4D1     | -0.35434124 | 0.03762293 | -2.81020160 |     |
| ESPNL     | -0.35424369 | 0.03762293 | -2.80931687 |     |
| IDE       | 0.35428049  | 0.03762293 | 2.80965061  |     |
| RPL10P13  | -0.35435287 | 0.03762293 | -2.81030704 |     |

|           |             |            |             |     |
|-----------|-------------|------------|-------------|-----|
| FLJ26245  | -0.35434600 | 0.03762293 | -2.81024474 |     |
| DPM3      | -0.35428462 | 0.03762293 | -2.80968806 |     |
| GRAMD1A   | -0.35426189 | 0.03762293 | -2.80948189 |     |
| TAF2      | 0.35425935  | 0.03762293 | 2.80945893  |     |
| DERL1     | 0.35438566  | 0.03762293 | 2.81060440  |     |
| UTP23     | 0.35432944  | 0.03762293 | 2.81009453  |     |
| ACBD6     | 0.35439004  | 0.03762293 | 2.81064418  |     |
| TMEM25    | -0.35432168 | 0.03762293 | -2.81002412 |     |
| KIAA1644  | -0.35424695 | 0.03762293 | -2.80934645 |     |
| EMILIN3   | -0.35429357 | 0.03762293 | -2.80976918 | yes |
| BUB3      | 0.35432831  | 0.03762293 | 2.81008433  |     |
| GNPDA1    | 0.35410216  | 0.03762770 | 2.80803352  |     |
| INADL     | 0.35406832  | 0.03762770 | 2.80772670  | yes |
| EDN3      | -0.35410800 | 0.03762770 | -2.80808648 |     |
| RNF160    | 0.35420746  | 0.03762770 | 2.80898836  |     |
| LOC388955 | 0.35416068  | 0.03762770 | 2.80856418  |     |
| FEZF1     | -0.35417453 | 0.03762770 | -2.80868975 |     |
| MSH2      | 0.35412953  | 0.03762770 | 2.80828166  |     |
| MYL2      | -0.35410376 | 0.03762770 | -2.80804804 |     |
| PAK1      | 0.35413505  | 0.03762770 | 2.80833176  |     |
| DPH5      | 0.35407428  | 0.03762770 | 2.80778078  |     |
| PBRM1     | 0.35416893  | 0.03762770 | 2.80863899  | yes |
| TMEM30A   | 0.35407861  | 0.03762770 | 2.80781998  |     |
| INTS9     | 0.35412379  | 0.03762770 | 2.80822964  |     |
| ADAMTS10  | -0.35406509 | 0.03762770 | -2.80769741 | yes |
| GCM2      | -0.35418827 | 0.03762770 | -2.80881429 |     |
| RLN1      | -0.35401413 | 0.03765405 | -2.80723541 |     |
| ABCC8     | -0.35402158 | 0.03765405 | -2.80730291 |     |
| OR7E24    | -0.35398414 | 0.03767141 | -2.80696350 |     |
| LOC728847 | -0.35396269 | 0.03768086 | -2.80676912 |     |
| GNL2      | 0.35395043  | 0.03768183 | 2.80665793  |     |
| ANAPC13   | 0.35393320  | 0.03768739 | 2.80650175  |     |
| TREML2    | -0.35391670 | 0.03769228 | -2.80635221 |     |
| FLRT1     | -0.35385657 | 0.03773757 | -2.80580713 |     |
| HTR6      | -0.35380607 | 0.03777398 | -2.80534937 |     |
| EGR3      | -0.35378485 | 0.03778327 | -2.80515703 |     |
| COL10A1   | -0.35376396 | 0.03779224 | -2.80496776 |     |
| STARD7    | 0.35374235  | 0.03780189 | 2.80477192  |     |
| C1orf211  | -0.35369275 | 0.03780955 | -2.80432237 |     |
| C1GALT1   | 0.35368930  | 0.03780955 | 2.80429107  |     |
| UBE2V2    | 0.35371952  | 0.03780955 | 2.80456497  |     |
| NPL       | 0.35370187  | 0.03780955 | 2.80440500  |     |
| ETNK1     | 0.35366671  | 0.03782012 | 2.80408638  |     |
| ONECUT2   | -0.35364870 | 0.03782645 | -2.80392319 |     |
| GP9       | -0.35358590 | 0.03787437 | -2.80335410 |     |
| CYP11B1   | -0.35353654 | 0.03787866 | -2.80290689 |     |
| IMP5      | -0.35353894 | 0.03787866 | -2.80292863 |     |
| ANKRD58   | -0.35355882 | 0.03787866 | -2.80310871 |     |
| MAP3K7    | 0.35354809  | 0.03787866 | 2.80301152  |     |
| LOC388882 | -0.35351141 | 0.03789162 | -2.80267921 |     |

|           |             |            |             |
|-----------|-------------|------------|-------------|
| TESSP5    | -0.35349855 | 0.03789320 | -2.80256265 |
| ACOT12    | -0.35334981 | 0.03791734 | -2.80121518 |
| OR10H3    | -0.35335097 | 0.03791734 | -2.80122570 |
| MYPOP     | -0.35344115 | 0.03791734 | -2.80204259 |
| BARHL2    | -0.35341422 | 0.03791734 | -2.80179862 |
| MAGEC2    | -0.35341597 | 0.03791734 | -2.80181451 |
| POU3F1    | -0.35340402 | 0.03791734 | -2.80170625 |
| ITLN1     | -0.35336902 | 0.03791734 | -2.80138922 |
| SLC1A7    | -0.35338162 | 0.03791734 | -2.80150331 |
| FSD1      | -0.35337584 | 0.03791734 | -2.80145092 |
| FAM186B   | -0.35344334 | 0.03791734 | -2.80206244 |
| DDX23     | 0.35340564  | 0.03791734 | 2.80172093  |
| DRD5      | -0.35332792 | 0.03792253 | -2.80101692 |
| TMEM31    | -0.35331081 | 0.03792253 | -2.80086189 |
| TCERG1L   | -0.35331317 | 0.03792253 | -2.80088329 |
| AP1S2     | -0.35328635 | 0.03793491 | -2.80064037 |
| TNRC6C    | -0.35325804 | 0.03794054 | -2.80038386 |
| GTF3C3    | 0.35326199  | 0.03794054 | 2.80041966  |
| UNQ9368   | -0.35320977 | 0.03797508 | -2.79994667 |
| GRIK4     | -0.35317061 | 0.03799253 | -2.79959207 |
| TSPAN6    | 0.35316876  | 0.03799253 | 2.79957529  |
| KCNH8     | -0.35314748 | 0.03799623 | -2.79938254 |
| MEFV      | -0.35312457 | 0.03799623 | -2.79917508 |
| PRPS1     | 0.35312993  | 0.03799623 | 2.79922365  |
| PSMD12    | 0.35312031  | 0.03799623 | 2.79913648  |
| CDX4      | -0.35306564 | 0.03802578 | -2.79864145 |
| ACE       | -0.35305524 | 0.03802578 | -2.79854720 |
| SAMM50    | 0.35307484  | 0.03802578 | 2.79872475  |
| RLBP1L1   | -0.35302884 | 0.03804002 | -2.79830817 |
| XCR1      | -0.35300804 | 0.03804035 | -2.79811983 |
| LACRT     | -0.35300628 | 0.03804035 | -2.79810391 |
| C21orf29  | -0.35298502 | 0.03804981 | -2.79791138 |
| LOC400986 | 0.35294561  | 0.03807620 | 2.79755455  |
| GNS       | 0.35291417  | 0.03809516 | 2.79726990  |
| C12orf35  | 0.35289046  | 0.03810693 | 2.79705527  |
| HAVCR1    | -0.35285016 | 0.03811522 | -2.79669038 |
| NMI       | 0.35285410  | 0.03811522 | 2.79672610  |
| CACNA2D4  | -0.35284831 | 0.03811522 | -2.79667362 |
| GCNT7     | -0.35280030 | 0.03813934 | -2.79623898 |
| MIOS      | 0.35281103  | 0.03813934 | 2.79633616  |
| EXOC3L2   | -0.35276327 | 0.03816356 | -2.79590379 |
| FRMD3     | -0.35274734 | 0.03816809 | -2.79575959 |
| C2orf47   | 0.35273438  | 0.03816984 | 2.79564234  |
| LOC731797 | -0.35270562 | 0.03818637 | -2.79538196 |
| MTERFD1   | 0.35268980  | 0.03819080 | 2.79523882  |
| GCLM      | 0.35264462  | 0.03819562 | 2.79482987  |
| ZNF260    | 0.35266533  | 0.03819562 | 2.79501732  |
| FLJ44653  | -0.35265593 | 0.03819562 | -2.79493224 |
| C12orf4   | 0.35264039  | 0.03819562 | 2.79479158  |
| PCF11     | 0.35259216  | 0.03822003 | 2.79435501  |

|           |             |            |             |     |
|-----------|-------------|------------|-------------|-----|
| PGF       | -0.35259839 | 0.03822003 | -2.79441143 | yes |
| PRSS21    | -0.35249142 | 0.03823910 | -2.79344340 |     |
| ENPEP     | -0.35252388 | 0.03823910 | -2.79373713 | yes |
| MRGPRX1   | -0.35254105 | 0.03823910 | -2.79389249 |     |
| CHIC2     | 0.35250166  | 0.03823910 | 2.79353601  |     |
| SAMD7     | -0.35248340 | 0.03823910 | -2.79337082 |     |
| ANKRD34C  | -0.35252421 | 0.03823910 | -2.79374014 |     |
| MUC6      | -0.35250202 | 0.03823910 | -2.79353928 |     |
| MOBKL1B   | 0.35253096  | 0.03823910 | 2.79380121  |     |
| STC2      | -0.35245720 | 0.03825328 | -2.79313372 |     |
| FRS3      | -0.35242062 | 0.03827718 | -2.79280273 |     |
| FAR1      | 0.35237402  | 0.03831047 | 2.79238107  |     |
| IRX1      | -0.35235066 | 0.03832201 | -2.79216972 |     |
| PTH2      | -0.35225925 | 0.03838700 | -2.79134272 |     |
| NUDT12    | 0.35225960  | 0.03838700 | 2.79134589  |     |
| DNMT3L    | -0.35222747 | 0.03840647 | -2.79105518 |     |
| IQCA1L    | -0.35220260 | 0.03841946 | -2.79083027 |     |
| HOXD8     | -0.35215115 | 0.03845742 | -2.79036480 |     |
| CCDC124   | -0.35211630 | 0.03846632 | -2.79004964 |     |
| DECR1     | 0.35208660  | 0.03846632 | 2.78978101  |     |
| KIAA1383  | -0.35210228 | 0.03846632 | -2.78992276 |     |
| NSMAF     | 0.35209905  | 0.03846632 | 2.78989361  |     |
| GALR3     | -0.35209366 | 0.03846632 | -2.78984483 |     |
| FTMT      | -0.35207143 | 0.03847024 | -2.78964373 |     |
| UTP3      | 0.35203777  | 0.03849152 | 2.78933935  |     |
| CCDC28B   | -0.35201316 | 0.03850432 | -2.78911671 |     |
| LAMC3     | -0.35184023 | 0.03850902 | -2.78755291 |     |
| USH1G     | -0.35191322 | 0.03850902 | -2.78821295 |     |
| ADAM3A    | -0.35184666 | 0.03850902 | -2.78761104 |     |
| UGT3A2    | -0.35187637 | 0.03850902 | -2.78787976 |     |
| GABRD     | -0.35188298 | 0.03850902 | -2.78793946 |     |
| GRM4      | -0.35197148 | 0.03850902 | -2.78873983 |     |
| CLEC4G    | -0.35193609 | 0.03850902 | -2.78841974 |     |
| LOC389895 | -0.35186440 | 0.03850902 | -2.78777144 |     |
| TRIM61    | -0.35192384 | 0.03850902 | -2.78830896 |     |
| ZNF701    | 0.35197765  | 0.03850902 | 2.78879562  |     |
| FOXL2     | -0.35194355 | 0.03850902 | -2.78848721 |     |
| SYP       | -0.35185696 | 0.03850902 | -2.78770416 |     |
| SNORD6    | 0.35196760  | 0.03850902 | 2.78870466  |     |
| TMEM87B   | 0.35185303  | 0.03850902 | 2.78766866  |     |
| TAF1B     | 0.35184562  | 0.03850902 | 2.78760162  |     |
| SFRS2IP   | 0.35183249  | 0.03850902 | 2.78748296  |     |
| PROKR1    | -0.35182007 | 0.03851040 | -2.78737063 |     |
| HS3ST2    | -0.35180765 | 0.03851177 | -2.78725834 |     |
| C11orf73  | 0.35175764  | 0.03854848 | 2.78680615  |     |
| C15orf32  | -0.35161991 | 0.03866782 | -2.78556104 |     |
| ASB17     | -0.35159759 | 0.03867854 | -2.78535923 |     |
| CLDN18    | -0.35157924 | 0.03868423 | -2.78519336 |     |
| NUP54     | 0.35156966  | 0.03868423 | 2.78510680  |     |
| CLUU1OS   | -0.35153237 | 0.03870907 | -2.78476973 |     |

|            |             |            |             |     |
|------------|-------------|------------|-------------|-----|
| ZNF131     | 0.35151673  | 0.03871350 | 2.78462837  |     |
| LRRC3      | -0.35135449 | 0.03885647 | -2.78316205 |     |
| NUP107     | 0.35132765  | 0.03887152 | 2.78291950  |     |
| EBF1       | -0.35129614 | 0.03889099 | -2.78263484 | yes |
| CLN5       | 0.35128416  | 0.03889198 | 2.78252657  |     |
| C16orf78   | -0.35122980 | 0.03893312 | -2.78203539 |     |
| DHX36      | 0.35121655  | 0.03893532 | 2.78191562  |     |
| FGD1       | -0.35118195 | 0.03894739 | -2.78160302 |     |
| RBX1       | 0.35118344  | 0.03894739 | 2.78161649  |     |
| CHML       | 0.35115512  | 0.03895211 | 2.78136059  |     |
| GTF3C2     | 0.35116315  | 0.03895211 | 2.78143317  |     |
| DDX18      | 0.35112932  | 0.03896621 | 2.78112754  |     |
| RNF111     | 0.35110818  | 0.03897093 | 2.78093656  |     |
| IFT80      | 0.35110249  | 0.03897093 | 2.78088519  |     |
| OR52W1     | -0.35107534 | 0.03897557 | -2.78063991 |     |
| GNPDA2     | 0.35104420  | 0.03897557 | 2.78035854  |     |
| RPL10L     | -0.35104266 | 0.03897557 | -2.78034465 |     |
| GABPB1     | 0.35102123  | 0.03897557 | 2.78015109  |     |
| OR2G6      | -0.35105560 | 0.03897557 | -2.78046156 |     |
| NOP58      | 0.35106648  | 0.03897557 | 2.78055980  |     |
| UNKL       | -0.35102149 | 0.03897557 | -2.78015343 | yes |
| BMP2K      | 0.35096740  | 0.03900596 | 2.77966487  |     |
| ZNF394     | 0.35097119  | 0.03900596 | 2.77969903  |     |
| DRD4       | -0.35091235 | 0.03904007 | -2.77916763 |     |
| DHX32      | 0.35090968  | 0.03904007 | 2.77914351  | yes |
| NUBPL      | 0.35089433  | 0.03904430 | 2.77900484  |     |
| IL17D      | -0.35085276 | 0.03907345 | -2.77862938 |     |
| HTR2C      | -0.35081627 | 0.03907709 | -2.77829982 |     |
| FLJ42291   | -0.35083230 | 0.03907709 | -2.77844461 |     |
| TBX15      | -0.35082251 | 0.03907709 | -2.77835623 |     |
| EXOSC1     | 0.35077793  | 0.03910319 | 2.77795359  |     |
| GPR128     | -0.35076316 | 0.03910689 | -2.77782019 |     |
| FLJ46321   | -0.35075152 | 0.03910761 | -2.77771510 |     |
| LYSMD3     | 0.35073354  | 0.03910858 | 2.77755276  |     |
| NUP155     | 0.35072875  | 0.03910858 | 2.77750951  |     |
| GPR173     | -0.35071000 | 0.03911607 | -2.77734023 |     |
| FOLR1      | -0.35069383 | 0.03912112 | -2.77719421 |     |
| DYSFIP1    | -0.35061982 | 0.03918120 | -2.77652592 |     |
| MNT        | -0.35059180 | 0.03919754 | -2.77627291 |     |
| CIDEA      | -0.35054311 | 0.03923358 | -2.77583338 |     |
| NCOA2      | 0.35051425  | 0.03923676 | 2.77557283  |     |
| C12orf41   | 0.35049635  | 0.03923676 | 2.77541123  |     |
| SLC39A9    | 0.35050653  | 0.03923676 | 2.77550313  |     |
| GREB1      | -0.35051667 | 0.03923676 | -2.77559467 |     |
| RASD2      | -0.35045465 | 0.03926617 | -2.77503479 |     |
| DLX5       | -0.35040113 | 0.03929932 | -2.77455167 |     |
| NCRNA00167 | -0.35039821 | 0.03929932 | -2.77452529 |     |
| TTC9B      | -0.35036789 | 0.03931791 | -2.77425159 |     |
| EYS        | -0.35034368 | 0.03933067 | -2.77403309 |     |
| CNGB1      | -0.35028041 | 0.03934407 | -2.77346209 |     |

|              |             |            |             |     |
|--------------|-------------|------------|-------------|-----|
| CD55         | 0.35030286  | 0.03934407 | 2.77366469  |     |
| EPHB1        | -0.35026529 | 0.03934407 | -2.77332565 | yes |
| ALPPL2       | -0.35028277 | 0.03934407 | -2.77348334 |     |
| PTK2         | 0.35025379  | 0.03934407 | 2.77322185  |     |
| GRRP1        | -0.35027435 | 0.03934407 | -2.77340734 |     |
| SPSB2        | -0.35025719 | 0.03934407 | -2.77325247 |     |
| SCO1         | 0.35024247  | 0.03934454 | 2.77311968  |     |
| C6orf1       | -0.35018412 | 0.03936218 | -2.77259310 |     |
| MFAP3        | 0.35019527  | 0.03936218 | 2.77269372  |     |
| NEUROG3      | -0.35019709 | 0.03936218 | -2.77271008 |     |
| PTPLAD1      | 0.35018073  | 0.03936218 | 2.77256251  |     |
| SUPT7L       | 0.35015464  | 0.03937677 | 2.77232708  |     |
| LOC100129196 | -0.35013808 | 0.03938227 | -2.77217759 |     |
| C6orf106     | 0.35011772  | 0.03939140 | 2.77199389  |     |
| ANK1         | -0.35007158 | 0.03942518 | -2.77157756 |     |
| ANKRA2       | 0.35002896  | 0.03945561 | 2.77119303  |     |
| ATP1A4       | -0.35000150 | 0.03946430 | -2.77094531 |     |
| KCNK12       | -0.34999827 | 0.03946430 | -2.77091616 |     |
| TARBP2       | -0.34996454 | 0.03948626 | -2.77061181 |     |
| BFAR         | 0.34994284  | 0.03949106 | 2.77041600  |     |
| SMS          | 0.34993251  | 0.03949106 | 2.77032289  |     |
| TNFSF12      | -0.34991635 | 0.03949106 | -2.77017704 |     |
| HAND2        | -0.34991938 | 0.03949106 | -2.77020436 |     |
| OSBPL11      | 0.34986084  | 0.03950812 | 2.76967628  |     |
| GCK          | -0.34984714 | 0.03950812 | -2.76955270 |     |
| UCHL5        | 0.34983383  | 0.03950812 | 2.76943269  |     |
| SNX14        | 0.34984884  | 0.03950812 | 2.76956804  |     |
| ZBED3        | -0.34983412 | 0.03950812 | -2.76943532 |     |
| TP53I13      | -0.34988769 | 0.03950812 | -2.76991853 |     |
| SOBP         | -0.34976556 | 0.03954821 | -2.76881689 |     |
| ISY1         | 0.34976597  | 0.03954821 | 2.76882056  |     |
| FAM167B      | -0.34975967 | 0.03954821 | -2.76876379 |     |
| PPP2R5A      | 0.34970654  | 0.03958884 | 2.76828456  |     |
| LASS2        | 0.34964936  | 0.03963338 | 2.76776888  |     |
| TMF1         | 0.34955706  | 0.03971174 | 2.76693654  |     |
| LOC100133033 | -0.34952375 | 0.03972493 | -2.76663618 |     |
| CRIPAK       | 0.34952182  | 0.03972493 | 2.76661874  |     |
| AGA          | 0.34950582  | 0.03972996 | 2.76647451  |     |
| OR2S2        | -0.34949302 | 0.03973193 | -2.76635904 |     |
| OR10H4       | -0.34944711 | 0.03975541 | -2.76594513 |     |
| NUP43        | 0.34945062  | 0.03975541 | 2.76597673  |     |
| ENO1         | 0.34942664  | 0.03976476 | 2.76576060  |     |
| TNPO3        | 0.34935252  | 0.03982580 | 2.76509236  |     |
| OR52R1       | -0.34931394 | 0.03983469 | -2.76474457 |     |
| OR14C36      | -0.34930924 | 0.03983469 | -2.76470216 |     |
| OR51F1       | -0.34930032 | 0.03983469 | -2.76462171 |     |
| OTOP3        | -0.34930893 | 0.03983469 | -2.76469938 |     |
| ANXA2P3      | -0.34925454 | 0.03983741 | -2.76420903 |     |
| hCG_1771830  | -0.34926215 | 0.03983741 | -2.76427771 |     |
| LOC727721    | -0.34927348 | 0.03983741 | -2.76437979 |     |

|              |             |            |             |     |
|--------------|-------------|------------|-------------|-----|
| ZNF3         | 0.34926597  | 0.03983741 | 2.76431206  |     |
| RP1L1        | -0.34922764 | 0.03985300 | -2.76396659 |     |
| ENSA         | 0.34918073  | 0.03988789 | 2.76354379  |     |
| OR6C4        | -0.34912707 | 0.03991898 | -2.76306013 |     |
| C1orf115     | -0.34913203 | 0.03991898 | -2.76310480 |     |
| LEPROTL1     | 0.34908946  | 0.03994495 | 2.76272116  |     |
| SNORD116-10  | -0.34899533 | 0.03994615 | -2.76187291 |     |
| OR51S1       | -0.34899449 | 0.03994615 | -2.76186528 |     |
| SLC39A12     | -0.34898353 | 0.03994615 | -2.76176657 |     |
| AP4E1        | 0.34903700  | 0.03994615 | 2.76224835  |     |
| DAAM2        | -0.34900181 | 0.03994615 | -2.76193128 | yes |
| CSNK2A1P     | 0.34903894  | 0.03994615 | 2.76226586  |     |
| ACRV1        | -0.34905828 | 0.03994615 | -2.76244013 |     |
| LOC644538    | -0.34898108 | 0.03994615 | -2.76174446 |     |
| LOC730098    | -0.34898126 | 0.03994615 | -2.76174606 |     |
| ATOH8        | -0.34905991 | 0.03994615 | -2.76245486 |     |
| C6orf126     | -0.34891901 | 0.03996682 | -2.76118515 |     |
| NTSR1        | -0.34892417 | 0.03996682 | -2.76123169 |     |
| FGFRL1       | -0.34894117 | 0.03996682 | -2.76138480 |     |
| C3orf20      | -0.34891690 | 0.03996682 | -2.76116613 |     |
| OXSR1        | 0.34886860  | 0.04000316 | 2.76073099  |     |
| GRIA4        | -0.34882618 | 0.04002854 | -2.76034872 |     |
| SYN2         | -0.34882099 | 0.04002854 | -2.76030199 |     |
| CASKIN1      | -0.34880704 | 0.04003169 | -2.76017631 |     |
| GPR62        | -0.34879156 | 0.04003633 | -2.76003688 |     |
| RPS26        | -0.34878062 | 0.04003658 | -2.75993829 |     |
| ACP6         | 0.34871950  | 0.04008541 | 2.75938766  |     |
| NAALADL1     | -0.34862878 | 0.04010147 | -2.75857046 |     |
| CCDC155      | -0.34864814 | 0.04010147 | -2.75874490 |     |
| SERINC5      | 0.34860689  | 0.04010147 | 2.75837329  |     |
| FLJ40235     | -0.34863867 | 0.04010147 | -2.75865953 |     |
| FAM151A      | -0.34865356 | 0.04010147 | -2.75879370 |     |
| TXNRD1       | 0.34861051  | 0.04010147 | 2.75840589  |     |
| C6orf25      | -0.34866945 | 0.04010147 | -2.75893685 |     |
| KHDC1        | -0.34868917 | 0.04010147 | -2.75911451 |     |
| TAGLN2       | 0.34861724  | 0.04010147 | 2.75846651  |     |
| LOC100131054 | -0.34859207 | 0.04010550 | -2.75823986 |     |
| INTS2        | 0.34856801  | 0.04011848 | 2.75802316  |     |
| FMR1NB       | -0.34852291 | 0.04014615 | -2.75761696 |     |
| IER5L        | -0.34849686 | 0.04014615 | -2.75738230 |     |
| DACT1        | -0.34849768 | 0.04014615 | -2.75738970 |     |
| CDC16        | 0.34851177  | 0.04014615 | 2.75751657  |     |
| LOC100130348 | -0.34840650 | 0.04017586 | -2.75656858 |     |
| C6orf130     | 0.34839274  | 0.04017586 | 2.75644470  |     |
| SNORD59A     | 0.34840663  | 0.04017586 | 2.75656979  |     |
| APLP2        | 0.34839174  | 0.04017586 | 2.75643571  |     |
| ACADM        | 0.34842922  | 0.04017586 | 2.75677318  |     |
| FLG2         | -0.34841129 | 0.04017586 | -2.75661171 |     |
| CLDN12       | 0.34844209  | 0.04017586 | 2.75688907  |     |
| LOXHD1       | -0.34833781 | 0.04020756 | -2.75595006 |     |



|              |             |            |             |     |
|--------------|-------------|------------|-------------|-----|
| PPIL3        | 0.34834756  | 0.04020756 | 2.75603788  |     |
| TMIGD2       | -0.34830960 | 0.04022462 | -2.75569604 |     |
| ZUFSP        | 0.34827979  | 0.04024324 | 2.75542769  |     |
| GNAT2        | -0.34823629 | 0.04027518 | -2.75503596 |     |
| GALNT4       | 0.34817539  | 0.04032404 | 2.75448776  |     |
| CSNK2A1      | 0.34816386  | 0.04032493 | 2.75438396  | yes |
| EMX2         | -0.34815098 | 0.04032714 | -2.75426793 |     |
| IFNA10       | -0.34812974 | 0.04033746 | -2.75407680 |     |
| RC3H2        | 0.34811290  | 0.04034352 | 2.75392519  |     |
| WFDC9        | -0.34809485 | 0.04035076 | -2.75376266 |     |
| EXOC5        | 0.34805521  | 0.04036868 | 2.75340591  |     |
| VSX2         | -0.34806162 | 0.04036868 | -2.75346353 |     |
| GRSF1        | 0.34803336  | 0.04036931 | 2.75320924  |     |
| GNL3L        | 0.34803506  | 0.04036931 | 2.75322447  |     |
| IL28B        | -0.34801476 | 0.04037281 | -2.75304175 |     |
| RLIM         | 0.34800857  | 0.04037281 | 2.75298610  |     |
| GNG8         | -0.34796386 | 0.04040602 | -2.75258361 |     |
| DDX10        | 0.34794821  | 0.04041095 | 2.75244276  |     |
| SIAE         | 0.34791043  | 0.04043743 | 2.75210277  |     |
| ZNF791       | 0.34786586  | 0.04046345 | 2.75170170  |     |
| FLJ35767     | -0.34786255 | 0.04046345 | -2.75167193 |     |
| ANKRD13B     | -0.34779167 | 0.04052226 | -2.75103409 |     |
| TMOD3        | 0.34773374  | 0.04055703 | 2.75051282  | yes |
| SLC25A24     | 0.34773178  | 0.04055703 | 2.75049519  |     |
| MPP4         | -0.34772431 | 0.04055703 | -2.75042797 |     |
| NKX2-6       | -0.34770253 | 0.04056092 | -2.75023198 |     |
| MIER3        | 0.34768860  | 0.04056092 | 2.75010664  |     |
| SMC1B        | -0.34768904 | 0.04056092 | -2.75011063 |     |
| C13orf31     | 0.34764929  | 0.04058900 | 2.74975294  |     |
| KANK3        | -0.34756987 | 0.04063579 | -2.74903845 |     |
| SULT4A1      | -0.34756930 | 0.04063579 | -2.74903337 |     |
| KRT20        | -0.34755915 | 0.04063579 | -2.74894202 |     |
| TFAM         | 0.34757569  | 0.04063579 | 2.74909081  |     |
| CT47.13      | -0.34747243 | 0.04069276 | -2.74816197 |     |
| SMARCC2      | -0.34748050 | 0.04069276 | -2.74823448 |     |
| LRBA         | 0.34746926  | 0.04069276 | 2.74813338  | yes |
| COG2         | 0.34745038  | 0.04070090 | 2.74796359  |     |
| RABGAP1L     | 0.34743669  | 0.04070397 | 2.74784042  |     |
| DMBT1        | -0.34740343 | 0.04071457 | -2.74754133 |     |
| PPY2         | -0.34739421 | 0.04071457 | -2.74745834 |     |
| FXVD8        | -0.34739813 | 0.04071457 | -2.74749367 |     |
| LOC100130872 | -0.34736487 | 0.04072264 | -2.74719452 |     |
| TGFBRAP1     | 0.34737343  | 0.04072264 | 2.74727150  |     |
| LOC391532    | -0.34733730 | 0.04073933 | -2.74694652 |     |
| SAC3D1       | -0.34726981 | 0.04076416 | -2.74633958 |     |
| C1orf183     | -0.34727427 | 0.04076416 | -2.74637966 |     |
| SLC6A3       | -0.34728994 | 0.04076416 | -2.74652056 |     |
| OR4A15       | -0.34727947 | 0.04076416 | -2.74642647 |     |
| LOC100131232 | -0.34720214 | 0.04080220 | -2.74573107 |     |
| CHCHD8       | 0.34719942  | 0.04080220 | 2.74570662  |     |

|             |             |            |             |     |
|-------------|-------------|------------|-------------|-----|
| FLJ33544    | -0.34721209 | 0.04080220 | -2.74582053 |     |
| NAT6        | -0.34717843 | 0.04081246 | -2.74551789 |     |
| SLITRK1     | -0.34714840 | 0.04082765 | -2.74524783 |     |
| FLJ25404    | -0.34714191 | 0.04082765 | -2.74518948 |     |
| OBP2A       | -0.34712523 | 0.04083369 | -2.74503950 |     |
| TPP2        | 0.34710510  | 0.04084312 | 2.74485854  |     |
| OR10G2      | -0.34705496 | 0.04086138 | -2.74440768 |     |
| NSUN3       | 0.34706318  | 0.04086138 | 2.74448161  |     |
| VGf         | -0.34705860 | 0.04086138 | -2.74444042 |     |
| SPINK5L2    | -0.34702709 | 0.04087843 | -2.74415718 |     |
| UBE2D1      | 0.34701373  | 0.04088123 | 2.74403700  |     |
| ADAMTS18    | -0.34698670 | 0.04088169 | -2.74379407 |     |
| IMPAD1      | 0.34697125  | 0.04088169 | 2.74365510  |     |
| PPP2R5B     | -0.34697213 | 0.04088169 | -2.74366308 |     |
| ERBB2IP     | 0.34698836  | 0.04088169 | 2.74380894  |     |
| HHAT        | 0.34693360  | 0.04090837 | 2.74331663  |     |
| SLC17A3     | -0.34688327 | 0.04092689 | -2.74286427 |     |
| OR5R1       | -0.34689375 | 0.04092689 | -2.74295843 |     |
| PDZD4       | -0.34690266 | 0.04092689 | -2.74303856 |     |
| STK32B      | -0.34686305 | 0.04093646 | -2.74268247 |     |
| ZNF766      | 0.34682741  | 0.04096119 | 2.74236212  |     |
| OR12D2      | -0.34674659 | 0.04103043 | -2.74163577 |     |
| CHRNA1      | -0.34672470 | 0.04104166 | -2.74143904 |     |
| CCT7        | 0.34662272  | 0.04106987 | 2.74052260  |     |
| HACL1       | 0.34664657  | 0.04106987 | 2.74073690  |     |
| ANGPT2      | -0.34664686 | 0.04106987 | -2.74073950 |     |
| PEX1        | 0.34665993  | 0.04106987 | 2.74085694  |     |
| SDF2        | 0.34665536  | 0.04106987 | 2.74081589  |     |
| BRDT        | -0.34662792 | 0.04106987 | -2.74056929 |     |
| SNORD30     | 0.34663895  | 0.04106987 | 2.74066847  |     |
| DYRK1A      | 0.34647676  | 0.04120361 | 2.73921110  | yes |
| MAS1        | -0.34642143 | 0.04123582 | -2.73871398 |     |
| RP11-35N6.1 | -0.34642433 | 0.04123582 | -2.73874005 |     |
| CLEC3B      | -0.34641278 | 0.04123582 | -2.73863630 | yes |
| ITGA2       | 0.34637409  | 0.04126373 | 2.73828875  |     |
| SDR42E1     | 0.34634685  | 0.04128034 | 2.73804402  |     |
| OR4K2       | -0.34633347 | 0.04128322 | -2.73792388 |     |
| DPF3        | -0.34630137 | 0.04130465 | -2.73763550 | yes |
| TRIM59      | 0.34624437  | 0.04134040 | 2.73712350  |     |
| SKP2        | 0.34625314  | 0.04134040 | 2.73720224  | yes |
| C3orf23     | 0.34621063  | 0.04135696 | 2.73682043  |     |
| PRDM8       | -0.34618585 | 0.04135696 | -2.73659788 |     |
| C21orf122   | -0.34620198 | 0.04135696 | -2.73674275 |     |
| WDR73       | 0.34618746  | 0.04135696 | 2.73661237  |     |
| CAP1        | 0.34617463  | 0.04135773 | 2.73649708  |     |
| PAQR3       | 0.34615291  | 0.04135854 | 2.73630208  |     |
| MFSD7       | -0.34616158 | 0.04135854 | -2.73637996 |     |
| USP46       | 0.34612913  | 0.04136582 | 2.73608850  | yes |
| RNF103      | 0.34612469  | 0.04136582 | 2.73604864  |     |
| MGC33407    | -0.34603686 | 0.04144260 | -2.73525990 |     |

|          |             |            |             |     |
|----------|-------------|------------|-------------|-----|
| STAB2    | -0.34601408 | 0.04145486 | -2.73505530 |     |
| FOXG1    | -0.34599265 | 0.04146577 | -2.73486290 |     |
| CDK8     | 0.34591333  | 0.04152386 | 2.73415073  |     |
| NHP2L1   | 0.34592002  | 0.04152386 | 2.73421078  |     |
| ERCC5    | 0.34590158  | 0.04152518 | 2.73404521  |     |
| PRR19    | -0.34588882 | 0.04152749 | -2.73393067 |     |
| PNPLA8   | 0.34581637  | 0.04157884 | 2.73328016  |     |
| STARD3NL | 0.34582306  | 0.04157884 | 2.73334021  |     |
| GABRP    | 0.34578041  | 0.04158366 | 2.73295738  |     |
| FLJ45079 | -0.34578026 | 0.04158366 | -2.73295604 |     |
| OR3A1    | -0.34579884 | 0.04158366 | -2.73312284 |     |
| AQR      | 0.34576585  | 0.04158763 | 2.73282667  |     |
| RHBDL3   | -0.34574474 | 0.04159828 | -2.73263715 |     |
| EGFL7    | -0.34571727 | 0.04161527 | -2.73239058 | yes |
| GPR44    | -0.34568300 | 0.04162867 | -2.73208292 |     |
| MCTS1    | 0.34569313  | 0.04162867 | 2.73217385  |     |
| EP400NL  | -0.34565362 | 0.04163720 | -2.73181923 |     |
| KRT34    | -0.34565838 | 0.04163720 | -2.73186198 |     |
| FARS2    | 0.34562120  | 0.04165915 | 2.73152822  |     |
| CCNC     | 0.34558715  | 0.04168272 | 2.73122267  |     |
| C2orf70  | -0.34556896 | 0.04169049 | -2.73105939 |     |
| ZNRF4    | -0.34553337 | 0.04169964 | -2.73073998 |     |
| GGNBP2   | 0.34552860  | 0.04169964 | 2.73069714  |     |
| SMG7     | 0.34553942  | 0.04169964 | 2.73079424  | yes |
| STK17B   | 0.34548627  | 0.04173151 | 2.73031729  |     |
| SNORA71B | -0.34544661 | 0.04176072 | -2.72996142 |     |
| KLHL17   | -0.34541598 | 0.04178094 | -2.72968655 |     |
| ZBED5    | 0.34539761  | 0.04178892 | 2.72952172  |     |
| XKR7     | -0.34538454 | 0.04179160 | -2.72940442 |     |
| ZMYM2    | 0.34536436  | 0.04180139 | 2.72922339  |     |
| ZNF598   | -0.34531852 | 0.04183684 | -2.72881204 |     |
| SRP68    | 0.34529923  | 0.04184575 | 2.72863898  |     |
| F5       | -0.34528217 | 0.04185243 | -2.72848592 |     |
| ANGPTL6  | -0.34526700 | 0.04185723 | -2.72834980 |     |
| MAMLD1   | -0.34522111 | 0.04187714 | -2.72793810 |     |
| ADD3     | 0.34521910  | 0.04187714 | 2.72792013  |     |
| MMD2     | -0.34519619 | 0.04187714 | -2.72771461 |     |
| KCNJ4    | -0.34519524 | 0.04187714 | -2.72770610 |     |
| C20orf27 | -0.34520797 | 0.04187714 | -2.72782023 |     |
| NNAT     | -0.34514938 | 0.04191268 | -2.72729466 |     |
| PSMD4    | 0.34513311  | 0.04191538 | 2.72714875  |     |
| C1orf124 | 0.34512596  | 0.04191538 | 2.72708462  |     |
| CPEB4    | 0.34511263  | 0.04191835 | 2.72696504  |     |
| MTRR     | 0.34509428  | 0.04192636 | 2.72680041  |     |
| GIN1     | 0.34502764  | 0.04198276 | 2.72620271  |     |
| KIR3DL1  | -0.34500663 | 0.04198307 | -2.72601424 |     |
| RAPSN    | -0.34501433 | 0.04198307 | -2.72608327 |     |
| YEATS4   | 0.34499569  | 0.04198366 | 2.72591615  |     |
| CSF2     | -0.34497690 | 0.04198423 | -2.72574757 |     |
| DLGAP3   | -0.34497443 | 0.04198423 | -2.72572544 |     |

|           |             |            |             |     |
|-----------|-------------|------------|-------------|-----|
| SPTY2D1   | 0.34492204  | 0.04200565 | 2.72525563  |     |
| ETFA      | 0.34493392  | 0.04200565 | 2.72536211  |     |
| HEPN1     | -0.34492527 | 0.04200565 | -2.72528459 |     |
| CNDP1     | -0.34490798 | 0.04200939 | -2.72512951 |     |
| LRRC7     | -0.34486513 | 0.04204201 | -2.72474528 |     |
| C16orf61  | 0.34483868  | 0.04205818 | 2.72450811  |     |
| CTDSPL2   | 0.34478825  | 0.04209845 | 2.72405586  |     |
| SERPINA2  | -0.34476890 | 0.04210752 | -2.72388233 |     |
| LRTM1     | -0.34473908 | 0.04212711 | -2.72361495 |     |
| CA14      | -0.34471325 | 0.04214269 | -2.72338336 |     |
| IPP       | 0.34468876  | 0.04214319 | 2.72316388  | yes |
| IL22      | -0.34468179 | 0.04214319 | -2.72310132 |     |
| PIGX      | 0.34469902  | 0.04214319 | 2.72325585  |     |
| QRFPR     | -0.34464494 | 0.04216352 | -2.72277096 |     |
| KIF2B     | -0.34464092 | 0.04216352 | -2.72273497 |     |
| HEATR3    | 0.34458292  | 0.04221151 | 2.72221495  |     |
| NAALAD2   | -0.34456305 | 0.04222112 | -2.72203689 |     |
| OR51I2    | -0.34452784 | 0.04224620 | -2.72172124 |     |
| FAT3      | -0.34449114 | 0.04227279 | -2.72139224 |     |
| HIST1H2BK | 0.34447646  | 0.04227720 | 2.72126067  |     |
| OR10J5    | -0.34443491 | 0.04230870 | -2.72088822 |     |
| C4orf15   | 0.34440157  | 0.04233193 | 2.72058942  |     |
| SPATA16   | -0.34436897 | 0.04235443 | -2.72029729 |     |
| RUSC1     | -0.34431687 | 0.04235504 | -2.71983035 |     |
| IL4       | -0.34432463 | 0.04235504 | -2.71989986 |     |
| MEP1B     | -0.34432922 | 0.04235504 | -2.71994099 | yes |
| RNF141    | 0.34433642  | 0.04235504 | 2.72000558  |     |
| KLHL14    | -0.34434915 | 0.04235504 | -2.72011968 |     |
| GALNT1    | 0.34429916  | 0.04236252 | 2.71967168  |     |
| CTNNB1    | 0.34426641  | 0.04237462 | 2.71937820  |     |
| OR8B12    | -0.34425632 | 0.04237462 | -2.71928775 |     |
| LXN       | 0.34426483  | 0.04237462 | 2.71936398  |     |
| EIF3D     | 0.34421050  | 0.04241050 | 2.71887717  |     |
| MGAT2     | 0.34419570  | 0.04241507 | 2.71874451  |     |
| RSAD1     | -0.34416365 | 0.04243706 | -2.71845740 |     |
| HOXC4     | -0.34413590 | 0.04245472 | -2.71820875 |     |
| SNORD5    | 0.34412377  | 0.04245660 | 2.71810003  |     |
| C9orf163  | -0.34406464 | 0.04250602 | -2.71757027 |     |
| HAPLN1    | -0.34403711 | 0.04251308 | -2.71732366 |     |
| TRAPPC4   | 0.34403979  | 0.04251308 | 2.71734768  |     |
| NT5DC1    | 0.34397850  | 0.04253509 | 2.71679864  |     |
| OR52A5    | -0.34397804 | 0.04253509 | -2.71679448 |     |
| PNMAL1    | -0.34397961 | 0.04253509 | -2.71680858 |     |
| PSPC1     | 0.34397430  | 0.04253509 | 2.71676098  |     |
| APOB      | -0.34395682 | 0.04254239 | -2.71660440 |     |
| ODZ3      | -0.34394140 | 0.04254761 | -2.71646631 |     |
| PKDREJ    | -0.34387012 | 0.04257827 | -2.71582775 |     |
| KCNH2     | -0.34390050 | 0.04257827 | -2.71609988 |     |
| DUSP21    | -0.34388020 | 0.04257827 | -2.71591809 |     |
| TNF       | -0.34387857 | 0.04257827 | -2.71590345 |     |

|              |             |            |             |     |
|--------------|-------------|------------|-------------|-----|
| ITLN2        | -0.34383370 | 0.04259765 | -2.71550161 |     |
| DHX8         | 0.34383049  | 0.04259765 | 2.71547282  |     |
| CCDC109B     | 0.34377656  | 0.04261077 | 2.71498986  |     |
| JPH2         | -0.34378135 | 0.04261077 | -2.71503270 | yes |
| BGLAP        | -0.34379127 | 0.04261077 | -2.71512154 |     |
| NT5C1B       | -0.34377798 | 0.04261077 | -2.71500251 |     |
| LSM6         | 0.34375678  | 0.04262044 | 2.71481271  |     |
| PPP1R13L     | -0.34365984 | 0.04265649 | -2.71394452 |     |
| GRIN3A       | -0.34368338 | 0.04265649 | -2.71415538 |     |
| SLC5A10      | -0.34370564 | 0.04265649 | -2.71435465 |     |
| LYZL4        | -0.34366699 | 0.04265649 | -2.71400856 |     |
| TMTC3        | 0.34369650  | 0.04265649 | 2.71427280  |     |
| CCDC87       | -0.34366959 | 0.04265649 | -2.71403182 |     |
| C6orf201     | -0.34362705 | 0.04267605 | -2.71365091 |     |
| EBF4         | -0.34362011 | 0.04267605 | -2.71358876 |     |
| RPS3         | 0.34360907  | 0.04267688 | 2.71348991  |     |
| LOC100133397 | -0.34355098 | 0.04270976 | -2.71296983 | yes |
| RPL8         | 0.34356629  | 0.04270976 | 2.71310688  |     |
| NPAS3        | -0.34354481 | 0.04270976 | -2.71291455 |     |
| FAM128A      | -0.34353580 | 0.04270976 | -2.71283390 |     |
| VPREB3       | -0.34350256 | 0.04273315 | -2.71253628 |     |
| MARCH4       | -0.34346978 | 0.04275607 | -2.71224281 |     |
| LIN28        | -0.34344607 | 0.04276980 | -2.71203050 |     |
| SCN10A       | -0.34340490 | 0.04280128 | -2.71166193 |     |
| POLR2B       | 0.34337959  | 0.04281664 | 2.71143535  |     |
| LOC441208    | -0.34334723 | 0.04283918 | -2.71114568 |     |
| MDM2         | 0.34328426  | 0.04287238 | 2.71058208  |     |
| NRIP3        | -0.34328622 | 0.04287238 | -2.71059959 |     |
| HDHD3        | 0.34328401  | 0.04287238 | 2.71057981  |     |
| LOC100128979 | -0.34315570 | 0.04291082 | -2.70943140 |     |
| TAC4         | -0.34315456 | 0.04291082 | -2.70942124 |     |
| ZFP41        | -0.34319622 | 0.04291082 | -2.70979406 |     |
| RILPL1       | -0.34316852 | 0.04291082 | -2.70954620 |     |
| LMX1A        | -0.34323092 | 0.04291082 | -2.71010464 |     |
| MTAP         | 0.34318239  | 0.04291082 | 2.70967025  |     |
| ATP5B        | 0.34315878  | 0.04291082 | 2.70945901  |     |
| SIGLEC12     | -0.34319506 | 0.04291082 | -2.70978370 |     |
| BTAF1        | 0.34316815  | 0.04291082 | 2.70954281  |     |
| CCDC138      | 0.34309993  | 0.04295612 | 2.70893235  | yes |
| TNFRSF4      | -0.34308551 | 0.04296044 | -2.70880330 |     |
| SHF          | -0.34305983 | 0.04297626 | -2.70857348 |     |
| NPY          | -0.34303877 | 0.04298736 | -2.70838504 |     |
| TIPARP       | 0.34296852  | 0.04302792 | 2.70775642  |     |
| BCL6         | 0.34297285  | 0.04302792 | 2.70779517  |     |
| CXorf56      | 0.34298551  | 0.04302792 | 2.70790851  |     |
| MYO6         | 0.34293856  | 0.04303774 | 2.70748836  | yes |
| CAND1        | 0.34294562  | 0.04303774 | 2.70755157  |     |
| SLC30A9      | 0.34291100  | 0.04305550 | 2.70724184  |     |
| RAET1G       | -0.34286228 | 0.04309490 | -2.70680592 |     |
| OR6T1        | -0.34278537 | 0.04313379 | -2.70611789 |     |

|             |             |            |             |     |
|-------------|-------------|------------|-------------|-----|
| C2orf48     | -0.34278454 | 0.04313379 | -2.70611047 |     |
| GABRQ       | -0.34281090 | 0.04313379 | -2.70634625 |     |
| CEACAM19    | -0.34278361 | 0.04313379 | -2.70610213 |     |
| LY6K        | -0.34274754 | 0.04316031 | -2.70577945 |     |
| ELMOD2      | 0.34267897  | 0.04322012 | 2.70516613  |     |
| COMTD1      | -0.34261255 | 0.04322013 | -2.70457201 |     |
| FLJ36070    | -0.34263772 | 0.04322013 | -2.70479721 |     |
| FAM182A     | -0.34262539 | 0.04322013 | -2.70468693 |     |
| KRTAP8-1    | -0.34260794 | 0.04322013 | -2.70453080 |     |
| PCTK3       | -0.34264282 | 0.04322013 | -2.70484283 |     |
| MSX2P1      | -0.34261978 | 0.04322013 | -2.70463671 |     |
| GEMIN7      | 0.34262858  | 0.04322013 | 2.70471547  |     |
| TRAF3       | 0.34257747  | 0.04324096 | 2.70425828  |     |
| IMPDH1      | -0.34255095 | 0.04325775 | -2.70402109 |     |
| OSBPL8      | 0.34251597  | 0.04327282 | 2.70370834  |     |
| LOC340602   | -0.34252539 | 0.04327282 | -2.70379255 |     |
| SERPINB11   | 0.34247945  | 0.04329989 | 2.70338172  |     |
| ANKRD30B    | -0.34245637 | 0.04330279 | -2.70317533 |     |
| NACA        | 0.34245706  | 0.04330279 | 2.70318153  |     |
| LIX1L       | -0.34231917 | 0.04343331 | -2.70194854 | yes |
| CLDND2      | -0.34229281 | 0.04343959 | -2.70171291 |     |
| CDR2L       | -0.34230097 | 0.04343959 | -2.70178583 | yes |
| RASL10A     | -0.34224941 | 0.04346619 | -2.70132484 |     |
| ANKRD10     | 0.34224671  | 0.04346619 | 2.70130071  |     |
| SNORD115-33 | -0.34221959 | 0.04348369 | -2.70105826 |     |
| KLF5        | 0.34219423  | 0.04349938 | 2.70083155  |     |
| FKBPL       | -0.34216756 | 0.04351642 | -2.70059320 |     |
| PRDM16      | -0.34215720 | 0.04351667 | -2.70050058 |     |
| UGT1A6      | 0.34211803  | 0.04354660 | 2.70015044  |     |
| CIRH1A      | 0.34208452  | 0.04357072 | 2.69985094  |     |
| NXPH1       | -0.34204684 | 0.04359915 | -2.69951414 |     |
| C1QTNF6     | -0.34195555 | 0.04364906 | -2.69869821 |     |
| FASTKD2     | 0.34196051  | 0.04364906 | 2.69874258  |     |
| RBMX        | -0.34197495 | 0.04364906 | -2.69887158 |     |
| KLRB1       | 0.34196353  | 0.04364906 | 2.69876950  |     |
| C2orf86     | 0.34192774  | 0.04364906 | 2.69844970  | yes |
| PRKCG       | -0.34193990 | 0.04364906 | -2.69855838 |     |
| SSTR2       | -0.34192916 | 0.04364906 | -2.69846239 |     |
| ATF5        | -0.34188319 | 0.04367341 | -2.69805159 |     |
| DOK7        | -0.34188124 | 0.04367341 | -2.69803415 |     |
| ANKRD50     | 0.34186411  | 0.04367341 | 2.69788103  |     |
| FAM105B     | 0.34186379  | 0.04367341 | 2.69787816  |     |
| PAX1        | -0.34183610 | 0.04369158 | -2.69763076 |     |
| MAB21L1     | -0.34181974 | 0.04369807 | -2.69748455 |     |
| CPSF6       | 0.34173651  | 0.04374496 | 2.69674089  |     |
| MAGEE2      | -0.34172452 | 0.04374496 | -2.69663381 |     |
| KCNV2       | -0.34171388 | 0.04374496 | -2.69653868 |     |
| OTP         | -0.34172245 | 0.04374496 | -2.69661526 |     |
| ANXA11      | 0.34174490  | 0.04374496 | 2.69681584  |     |
| TARBP1      | 0.34173708  | 0.04374496 | 2.69674597  |     |

|           |             |            |             |
|-----------|-------------|------------|-------------|
| AMOTL1    | -0.34164707 | 0.04379940 | -2.69594184 |
| CFLAR     | 0.34164110  | 0.04379940 | 2.69588849  |
| ANKMY2    | 0.34157642  | 0.04384551 | 2.69531069  |
| DNAH17    | -0.34158346 | 0.04384551 | -2.69537353 |
| OR2A25    | -0.34153106 | 0.04386121 | -2.69490550 |
| LGALS8    | 0.34154131  | 0.04386121 | 2.69499701  |
| NDUFB5    | 0.34153477  | 0.04386121 | 2.69493858  |
| EIF3L     | 0.34150874  | 0.04387391 | 2.69470614  |
| ACTL6B    | -0.34145761 | 0.04391648 | -2.69424945 |
| SSX2IP    | 0.34134679  | 0.04399150 | 2.69325963  |
| PSME4     | 0.34135081  | 0.04399150 | 2.69329559  |
| IFNA6     | -0.34131494 | 0.04399150 | -2.69297519 |
| KNG1      | -0.34131509 | 0.04399150 | -2.69297657 |
| MYBPC1    | -0.34134703 | 0.04399150 | -2.69326178 |
| STX8      | 0.34133832  | 0.04399150 | 2.69318401  |
| CDC25B    | -0.34132101 | 0.04399150 | -2.69302940 |
| TRIP12    | 0.34130100  | 0.04399554 | 2.69285069  |
| EEF1A1    | 0.34126326  | 0.04402371 | 2.69251368  |
| NBPF7     | -0.34125378 | 0.04402371 | -2.69242906 |
| SH3YL1    | 0.34123839  | 0.04402927 | 2.69229162  |
| BHLHE41   | -0.34119996 | 0.04404833 | -2.69194847 |
| RPAP3     | 0.34120092  | 0.04404833 | 2.69195703  |
| PMS1      | 0.34116919  | 0.04406989 | 2.69167370  |
| TAT       | -0.34115234 | 0.04407697 | -2.69152326 |
| CEBPA     | -0.34109915 | 0.04412187 | -2.69104840 |
| VPS35     | 0.34108093  | 0.04413039 | 2.69088571  |
| RAB3IL1   | -0.34106395 | 0.04413762 | -2.69073408 |
| IL17RD    | -0.34098168 | 0.04421288 | -2.68999965 |
| GRIN2A    | -0.34094844 | 0.04423709 | -2.68970292 |
| NDP       | -0.34093357 | 0.04424214 | -2.68957016 |
| EIF2S1    | 0.34090600  | 0.04426044 | 2.68932407  |
| KRT72     | -0.34086260 | 0.04427112 | -2.68893670 |
| HNF1A     | -0.34085566 | 0.04427112 | -2.68887478 |
| BRCC3     | 0.34085909  | 0.04427112 | 2.68890540  |
| LMBRD2    | 0.34086243  | 0.04427112 | 2.68893520  |
| WDR21B    | -0.34080330 | 0.04431533 | -2.68840744 |
| FGD5      | -0.34079139 | 0.04431730 | -2.68830117 |
| C18orf23  | -0.34074804 | 0.04433120 | -2.68791429 |
| GPR180    | 0.34075539  | 0.04433120 | 2.68797981  |
| EIF6      | 0.34074930  | 0.04433120 | 2.68792553  |
| LRPPRC    | 0.34073334  | 0.04433610 | 2.68778309  |
| LOC387825 | -0.34069102 | 0.04436987 | -2.68740543 |
| AQP8      | -0.34062177 | 0.04441090 | -2.68678743 |
| NUP62CL   | 0.34063806  | 0.04441090 | 2.68693279  |
| LIN37     | -0.34062350 | 0.04441090 | -2.68680291 |
| SPRR4     | -0.34055334 | 0.04447205 | -2.68617689 |
| KDSR      | 0.34053572  | 0.04448003 | 2.68601962  |
| AP3B2     | -0.34052133 | 0.04448462 | -2.68589127 |
| FLJ16165  | -0.34050501 | 0.04449125 | -2.68574562 |
| DPY19L4   | 0.34047561  | 0.04451158 | 2.68548335  |



|            |             |            |             |     |
|------------|-------------|------------|-------------|-----|
| MUC3A      | -0.34045057 | 0.04452251 | -2.68525996 |     |
| UBA3       | 0.34044520  | 0.04452251 | 2.68521200  |     |
| FAM40B     | -0.34043172 | 0.04452616 | -2.68509175 |     |
| RBBP9      | 0.34041937  | 0.04452863 | 2.68498158  |     |
| PDGFB      | -0.34035520 | 0.04455729 | -2.68440914 | yes |
| C14orf105  | -0.34035209 | 0.04455729 | -2.68438145 |     |
| CYP20A1    | 0.34037015  | 0.04455729 | 2.68454253  |     |
| AASDHPPT   | 0.34036176  | 0.04455729 | 2.68446767  |     |
| DEFB125    | -0.34032221 | 0.04455905 | -2.68411488 |     |
| KCNS2      | -0.34031220 | 0.04455905 | -2.68402561 |     |
| SPG21      | 0.34032616  | 0.04455905 | 2.68415008  |     |
| LRTM2      | -0.34031051 | 0.04455905 | -2.68401051 |     |
| GPC5       | -0.34026807 | 0.04456189 | -2.68363196 |     |
| C12orf42   | -0.34029053 | 0.04456189 | -2.68383228 |     |
| DBX2       | -0.34028378 | 0.04456189 | -2.68377205 |     |
| C11orf83   | -0.34026792 | 0.04456189 | -2.68363060 |     |
| STRBP      | 0.34024469  | 0.04457023 | 2.68342338  | yes |
| NPDC1      | -0.34024004 | 0.04457023 | -2.68338192 | yes |
| LCT        | -0.34021456 | 0.04457607 | -2.68315465 |     |
| CD7        | -0.34021627 | 0.04457607 | -2.68316997 |     |
| TIGD1      | 0.34019993  | 0.04458097 | 2.68302418  |     |
| XIAP       | 0.34015172  | 0.04461065 | 2.68259425  |     |
| TAF1A      | 0.34015353  | 0.04461065 | 2.68261035  |     |
| GAB4       | -0.34010982 | 0.04462330 | -2.68222053 |     |
| MMP27      | -0.34012014 | 0.04462330 | -2.68231264 |     |
| KRTAP4-2   | -0.34011772 | 0.04462330 | -2.68229104 |     |
| CRHR2      | -0.34005978 | 0.04462341 | -2.68177436 |     |
| DNAJC16    | 0.34006379  | 0.04462341 | 2.68181008  | yes |
| TEPP       | -0.34008989 | 0.04462341 | -2.68204284 |     |
| PCDHGA4    | -0.34003020 | 0.04462341 | -2.68151054 |     |
| RP1-27O5.1 | -0.34003387 | 0.04462341 | -2.68154328 |     |
| ZNF696     | -0.34003237 | 0.04462341 | -2.68152993 |     |
| TBX19      | -0.34003819 | 0.04462341 | -2.68158184 |     |
| CD9        | 0.34007226  | 0.04462341 | 2.68188561  |     |
| CSTF3      | 0.33998715  | 0.04465020 | 2.68112666  |     |
| YIPF7      | -0.33997126 | 0.04465020 | -2.68098505 |     |
| ANKRD33B   | -0.33997787 | 0.04465020 | -2.68104391 |     |
| USP14      | 0.33996497  | 0.04465020 | 2.68092890  |     |
| SERAC1     | 0.33987751  | 0.04472287 | 2.68014910  |     |
| TGS1       | 0.33987593  | 0.04472287 | 2.68013504  |     |
| EVI1       | 0.33986216  | 0.04472692 | 2.68001226  | yes |
| AWAT2      | -0.33980265 | 0.04474862 | -2.67948175 |     |
| TIPRL      | 0.33981100  | 0.04474862 | 2.67955616  |     |
| KLK1       | -0.33980185 | 0.04474862 | -2.67947460 |     |
| CD8B       | -0.33982141 | 0.04474862 | -2.67964901 |     |
| BIRC6      | 0.33978645  | 0.04475439 | 2.67933732  |     |
| MEX3D      | -0.33975633 | 0.04477564 | -2.67906879 |     |
| ELA3A      | -0.33972431 | 0.04478848 | -2.67878339 |     |
| MS4A6E     | -0.33972778 | 0.04478848 | -2.67881428 |     |
| POLR2K     | 0.33971045  | 0.04479264 | 2.67865986  |     |

|           |             |            |             |     |
|-----------|-------------|------------|-------------|-----|
| MGAT5     | 0.33964381  | 0.04485236 | 2.67806588  |     |
| TNFRSF10D | -0.33959568 | 0.04489264 | -2.67763689 | yes |
| C1QL2     | -0.33958490 | 0.04489357 | -2.67754079 |     |
| SLC25A36  | 0.33953083  | 0.04494014 | 2.67705892  |     |
| NIPSNAP3A | 0.33950513  | 0.04495682 | 2.67682984  |     |
| AGFG1     | 0.33946221  | 0.04497709 | 2.67644744  |     |
| TET2      | 0.33945623  | 0.04497709 | 2.67639410  | yes |
| OR6W1P    | -0.33946864 | 0.04497709 | -2.67650473 |     |
| E2F1      | -0.33938646 | 0.04504033 | -2.67577243 |     |
| C11orf17  | 0.33936774  | 0.04504967 | 2.67560557  |     |
| C10orf46  | 0.33931625  | 0.04508319 | 2.67514679  | yes |
| COPS3     | 0.33931916  | 0.04508319 | 2.67517276  |     |
| ART5      | -0.33929049 | 0.04509998 | -2.67491728 |     |
| HSP90AB1  | 0.33926186  | 0.04511981 | 2.67466225  |     |
| STMN2     | -0.33923602 | 0.04513670 | -2.67443203 |     |
| B3GNT5    | 0.33919233  | 0.04517250 | 2.67404279  | yes |
| CDH4      | -0.33917685 | 0.04517843 | -2.67390488 |     |
| CYLC1     | -0.33912313 | 0.04520395 | -2.67342635 |     |
| LOC284067 | -0.33912553 | 0.04520395 | -2.67344777 |     |
| UXS1      | 0.33913858  | 0.04520395 | 2.67356398  |     |
| SPATA21   | -0.33909914 | 0.04521891 | -2.67321266 |     |
| PCTK2     | 0.33907876  | 0.04523004 | 2.67303113  |     |
| PCID2     | 0.33903862  | 0.04526215 | 2.67267355  |     |
| DBT       | 0.33900396  | 0.04527802 | 2.67236489  |     |
| TENC1     | -0.33900392 | 0.04527802 | -2.67236455 |     |
| SEMA6C    | -0.33896277 | 0.04528462 | -2.67199801 |     |
| TXNL4A    | 0.33897316  | 0.04528462 | 2.67209061  |     |
| CCR3      | -0.33893198 | 0.04528462 | -2.67172383 |     |
| SMYD3     | 0.33894824  | 0.04528462 | 2.67186863  |     |
| LHX3      | -0.33893498 | 0.04528462 | -2.67175057 |     |
| FOSL1     | -0.33894804 | 0.04528462 | -2.67186688 |     |
| EIF4EBP3  | -0.33892867 | 0.04528462 | -2.67169435 |     |
| AIFM3     | -0.33891110 | 0.04529281 | -2.67153786 |     |
| CEACAM3   | -0.33889069 | 0.04530401 | -2.67135613 |     |
| OR14K1    | -0.33886053 | 0.04531043 | -2.67108749 |     |
| C3orf51   | -0.33885509 | 0.04531043 | -2.67103912 |     |
| TNFSF10   | 0.33886246  | 0.04531043 | 2.67110472  |     |
| RSL24D1   | 0.33884215  | 0.04531373 | 2.67092381  |     |
| FBXO3     | 0.33881716  | 0.04531936 | 2.67070130  |     |
| RPS3A     | -0.33882019 | 0.04531936 | -2.67072834 |     |
| OR52B6    | -0.33878566 | 0.04534235 | -2.67042082 |     |
| C1orf156  | 0.33875886  | 0.04536037 | 2.67018220  |     |
| SMEK3P    | -0.33871213 | 0.04539957 | -2.66976608 |     |
| FOXA2     | -0.33869164 | 0.04541089 | -2.66958371 |     |
| LOC113230 | -0.33867134 | 0.04541157 | -2.66940297 |     |
| KIAA1045  | -0.33867279 | 0.04541157 | -2.66941586 | yes |
| UNQ5814   | -0.33863061 | 0.04541334 | -2.66904037 |     |
| LRRN4CL   | -0.33861885 | 0.04541334 | -2.66893568 |     |
| FBXW11    | 0.33861072  | 0.04541334 | 2.66886329  |     |
| LMCD1     | -0.33864369 | 0.04541334 | -2.66915678 | yes |

|           |             |            |             |     |
|-----------|-------------|------------|-------------|-----|
| OR6X1     | -0.33865088 | 0.04541334 | -2.66922078 |     |
| NGRN      | 0.33862543  | 0.04541334 | 2.66899425  |     |
| ENO3      | -0.33854404 | 0.04543207 | -2.66826962 |     |
| MMP11     | -0.33855267 | 0.04543207 | -2.66834647 |     |
| BDH2      | 0.33858238  | 0.04543207 | 2.66861095  |     |
| COL18A1   | -0.33856881 | 0.04543207 | -2.66849012 |     |
| CASP1     | 0.33855554  | 0.04543207 | 2.66837206  |     |
| UNC13D    | -0.33852937 | 0.04543723 | -2.66813906 |     |
| SNX27     | 0.33848659  | 0.04546187 | 2.66775829  |     |
| CUL1      | 0.33848777  | 0.04546187 | 2.66776879  |     |
| PTPRZ1    | 0.33844448  | 0.04549625 | 2.66738343  |     |
| HMGXB3    | 0.33840711  | 0.04552559 | 2.66705084  |     |
| RPS26P54  | -0.33835091 | 0.04555264 | -2.66655061 |     |
| MRPL50    | 0.33833553  | 0.04555264 | 2.66641374  |     |
| ADCY10    | -0.33834622 | 0.04555264 | -2.66650887 |     |
| IQCJ      | -0.33833273 | 0.04555264 | -2.66638882 |     |
| JRK       | -0.33833964 | 0.04555264 | -2.66645038 |     |
| FTHL11    | 0.33832122  | 0.04555446 | 2.66628640  |     |
| VASH1     | -0.33829034 | 0.04555607 | -2.66601159 |     |
| DIRAS2    | -0.33829476 | 0.04555607 | -2.66605089 |     |
| KIAA0232  | 0.33829359  | 0.04555607 | 2.66604055  | yes |
| LOC131055 | -0.33826752 | 0.04556996 | -2.66580850 |     |
| TBX2      | -0.33820430 | 0.04562693 | -2.66524592 | yes |
| LOC389493 | -0.33818305 | 0.04563916 | -2.66505683 |     |
| RXFP2     | -0.33813238 | 0.04566740 | -2.66460601 |     |
| TDH       | -0.33812725 | 0.04566740 | -2.66456030 |     |
| C9orf50   | -0.33814314 | 0.04566740 | -2.66470174 |     |
| CYP8B1    | -0.33810372 | 0.04568208 | -2.66435096 |     |
| FLJ41484  | -0.33807579 | 0.04570145 | -2.66410251 |     |
| SLC25A32  | 0.33806192  | 0.04570583 | 2.66397906  |     |
| FAM69B    | -0.33799335 | 0.04576867 | -2.66336900 | yes |
| KHDRBS1   | 0.33793641  | 0.04580866 | 2.66286255  |     |
| NTSR2     | -0.33794578 | 0.04580866 | -2.66294583 |     |
| RAMP3     | -0.33789377 | 0.04581248 | -2.66248323 |     |
| DOM3Z     | -0.33790077 | 0.04581248 | -2.66254550 |     |
| GLDC      | -0.33789652 | 0.04581248 | -2.66250769 |     |
| SKI       | -0.33790703 | 0.04581248 | -2.66260117 |     |
| ZNF420    | 0.33784456  | 0.04581644 | 2.66204549  |     |
| ZNF366    | -0.33782068 | 0.04581644 | -2.66183304 |     |
| TIGD3     | -0.33780507 | 0.04581644 | -2.66169425 |     |
| OSBP2     | -0.33780759 | 0.04581644 | -2.66171662 |     |
| TMEM52    | -0.33787760 | 0.04581644 | -2.66233932 |     |
| LY6H      | -0.33785870 | 0.04581644 | -2.66217122 |     |
| GINS2     | -0.33782856 | 0.04581644 | -2.66190319 |     |
| PDZD7     | -0.33785413 | 0.04581644 | -2.66213062 |     |
| CCDC70    | -0.33780229 | 0.04581644 | -2.66166950 |     |
| PMCHL2    | -0.33775908 | 0.04584182 | -2.66128517 |     |
| TSEN2     | 0.33776386  | 0.04584182 | 2.66132769  |     |
| SFT2D1    | 0.33774844  | 0.04584278 | 2.66119053  |     |
| GP5       | -0.33769655 | 0.04588790 | -2.66072908 |     |

|              |             |            |             |     |
|--------------|-------------|------------|-------------|-----|
| ECD          | 0.33766450  | 0.04591181 | 2.66044404  |     |
| ANXA4        | 0.33763122  | 0.04593703 | 2.66014814  | yes |
| COL1A1       | -0.33758248 | 0.04597886 | -2.65971470 |     |
| NUDCD2       | 0.33755621  | 0.04599660 | 2.65948111  |     |
| LOC100133387 | -0.33748470 | 0.04601679 | -2.65884530 |     |
| LIAS         | 0.33748535  | 0.04601679 | 2.65885102  | yes |
| WDR7         | 0.33752411  | 0.04601679 | 2.65919571  |     |
| HSD17B2      | -0.33750959 | 0.04601679 | -2.65906659 |     |
| SFT2D2       | 0.33747901  | 0.04601679 | 2.65879472  |     |
| VRK1         | 0.33750561  | 0.04601679 | 2.65903119  |     |
| KIAA0774     | -0.33744390 | 0.04603361 | -2.65848250 |     |
| INPP4B       | 0.33745062  | 0.04603361 | 2.65854230  | yes |
| LPHN1        | -0.33741401 | 0.04604483 | -2.65821683 |     |
| GLTSCR1      | -0.33742240 | 0.04604483 | -2.65829136 |     |
| ITCH         | 0.33740066  | 0.04604873 | 2.65809812  |     |
| DCD          | -0.33735214 | 0.04606955 | -2.65766675 |     |
| TAS2R42      | -0.33736628 | 0.04606955 | -2.65779249 |     |
| SERPINF2     | -0.33735787 | 0.04606955 | -2.65771772 |     |
| OR52B2       | -0.33732373 | 0.04608963 | -2.65741425 |     |
| LILRB3       | -0.33729424 | 0.04609355 | -2.65715207 |     |
| DCP2         | 0.33730536  | 0.04609355 | 2.65725091  |     |
| LOC400940    | -0.33729097 | 0.04609355 | -2.65712298 |     |
| PI4K2B       | 0.33726102  | 0.04611530 | 2.65685680  |     |
| SFRS1        | 0.33724276  | 0.04612451 | 2.65669446  |     |
| OR10J3       | -0.33721285 | 0.04613580 | -2.65642865 |     |
| WNT10A       | -0.33721371 | 0.04613580 | -2.65643629 |     |
| SLC2A13      | 0.33713821  | 0.04617438 | 2.65576520  |     |
| C17orf64     | -0.33714171 | 0.04617438 | -2.65579636 |     |
| COL16A1      | -0.33714069 | 0.04617438 | -2.65578727 |     |
| C6orf120     | 0.33714435  | 0.04617438 | 2.65581976  |     |
| LOC283392    | -0.33708915 | 0.04621460 | -2.65532922 |     |
| MYL10        | -0.33708145 | 0.04621460 | -2.65526079 |     |
| TMEM5        | 0.33702543  | 0.04621630 | 2.65476294  |     |
| TUBB2C       | 0.33702373  | 0.04621630 | 2.65474788  |     |
| APOBEC3A     | -0.33706731 | 0.04621630 | -2.65513511 |     |
| C17orf66     | -0.33704978 | 0.04621630 | -2.65497936 |     |
| LOC389634    | -0.33704387 | 0.04621630 | -2.65492683 |     |
| C9orf6       | 0.33701211  | 0.04621630 | 2.65464454  | yes |
| SIGLEC6      | -0.33701420 | 0.04621630 | -2.65466312 |     |
| HESX1        | -0.33699331 | 0.04622612 | -2.65447751 |     |
| FGF1         | -0.33696605 | 0.04624505 | -2.65423529 |     |
| SELI         | 0.33689407  | 0.04630651 | 2.65359569  |     |
| MRFAP1       | 0.33688967  | 0.04630651 | 2.65355661  |     |
| KCNG2        | -0.33681276 | 0.04632199 | -2.65287329 |     |
| C3orf38      | 0.33682457  | 0.04632199 | 2.65297822  |     |
| MPG          | -0.33679801 | 0.04632199 | -2.65274224 |     |
| HCG4         | -0.33683144 | 0.04632199 | -2.65303922 |     |
| POGK         | 0.33681955  | 0.04632199 | 2.65293360  |     |
| NR2F2        | -0.33679993 | 0.04632199 | -2.65275931 |     |
| CARD14       | -0.33683599 | 0.04632199 | -2.65307970 |     |

|              |             |            |             |     |
|--------------|-------------|------------|-------------|-----|
| LTV1         | 0.33681545  | 0.04632199 | 2.65289718  |     |
| PLAC1        | -0.33678717 | 0.04632327 | -2.65264594 |     |
| BCAT1        | -0.33676527 | 0.04633647 | -2.65245140 |     |
| KRTAP5-11    | -0.33671699 | 0.04637814 | -2.65202252 |     |
| CSN3         | -0.33667839 | 0.04638856 | -2.65167957 |     |
| MFRP         | -0.33668667 | 0.04638856 | -2.65175314 |     |
| ZMYM5        | 0.33667982  | 0.04638856 | 2.65169228  |     |
| C22orf24     | -0.33666180 | 0.04639605 | -2.65153229 |     |
| LOC100128830 | -0.33664591 | 0.04639747 | -2.65139109 |     |
| METTL13      | 0.33664120  | 0.04639747 | 2.65134927  |     |
| MFSD8        | 0.33658319  | 0.04644970 | 2.65083403  |     |
| ZFYVE16      | 0.33652576  | 0.04650136 | 2.65032396  |     |
| NSFL1C       | 0.33650392  | 0.04650451 | 2.65012998  |     |
| PSMA7        | 0.33650357  | 0.04650451 | 2.65012683  |     |
| PLA2G2A      | -0.33647255 | 0.04652763 | -2.64985140 |     |
| PRDM6        | -0.33643517 | 0.04655766 | -2.64951938 |     |
| OXGR1        | -0.33640291 | 0.04658216 | -2.64923293 |     |
| C17orf71     | 0.33639033  | 0.04658535 | 2.64912119  |     |
| BCL2L10      | -0.33631592 | 0.04663592 | -2.64846051 |     |
| RAD50        | 0.33631724  | 0.04663592 | 2.64847219  |     |
| PAPOLA       | 0.33631476  | 0.04663592 | 2.64845018  | yes |
| MMP26        | -0.33628719 | 0.04665537 | -2.64820540 |     |
| GPR6         | -0.33627475 | 0.04665842 | -2.64809492 |     |
| RASGEF1A     | -0.33624147 | 0.04667189 | -2.64779950 |     |
| ZNF35        | 0.33624375  | 0.04667189 | 2.64781971  |     |
| REPS1        | 0.33623347  | 0.04667189 | 2.64772843  |     |
| LOC100133366 | -0.33617968 | 0.04669968 | -2.64725090 |     |
| CXCR6        | 0.33615977  | 0.04669968 | 2.64707409  |     |
| TMEM35       | -0.33618475 | 0.04669968 | -2.64729591 |     |
| DSN1         | 0.33616728  | 0.04669968 | 2.64714075  |     |
| ITFG1        | 0.33616736  | 0.04669968 | 2.64714150  |     |
| CPT2         | 0.33613491  | 0.04671622 | 2.64685345  |     |
| LOC100130507 | -0.33610074 | 0.04672203 | -2.64655009 |     |
| TIMM8A       | 0.33611299  | 0.04672203 | 2.64665880  |     |
| ELP3         | 0.33610703  | 0.04672203 | 2.64660590  |     |
| LYPD4        | -0.33606778 | 0.04674738 | -2.64625754 |     |
| UTS2         | -0.33600973 | 0.04676752 | -2.64574226 |     |
| FRK          | 0.33600481  | 0.04676752 | 2.64569855  | yes |
| TCTN3        | 0.33602248  | 0.04676752 | 2.64585540  |     |
| UFM1         | 0.33602158  | 0.04676752 | 2.64584740  |     |
| MEGF11       | -0.33600124 | 0.04676752 | -2.64566689 |     |
| WNT7A        | -0.33597512 | 0.04678547 | -2.64543500 |     |
| ITGAV        | 0.33596467  | 0.04678640 | 2.64534232  |     |
| FGFR1OP      | 0.33594957  | 0.04679238 | 2.64520828  |     |
| OTUD4        | 0.33593765  | 0.04679491 | 2.64510250  | yes |
| E2F6         | 0.33584923  | 0.04682559 | 2.64431771  |     |
| KIAA0831     | 0.33587537  | 0.04682559 | 2.64454970  |     |
| MAPRE1       | 0.33585761  | 0.04682559 | 2.64439214  |     |
| ALG6         | 0.33584192  | 0.04682559 | 2.64425289  |     |
| SHQ1         | 0.33583278  | 0.04682559 | 2.64417177  |     |

|           |             |            |             |     |
|-----------|-------------|------------|-------------|-----|
| VNN3      | 0.33584461  | 0.04682559 | 2.64427676  |     |
| KRTAP3-3  | -0.33585382 | 0.04682559 | -2.64435848 |     |
| RAB28     | 0.33585571  | 0.04682559 | 2.64437524  | yes |
| CEP78     | 0.33581555  | 0.04683256 | 2.64401884  |     |
| ATPBD4    | 0.33580722  | 0.04683256 | 2.64394491  |     |
| SAAL1     | 0.33577587  | 0.04685623 | 2.64366676  |     |
| KLHL10    | -0.33566712 | 0.04696415 | -2.64270179 |     |
| SETBP1    | -0.33562974 | 0.04699445 | -2.64237013 |     |
| C2orf46   | -0.33559909 | 0.04701743 | -2.64209816 |     |
| MED7      | 0.33556935  | 0.04703943 | 2.64183430  |     |
| HIST1H2AA | -0.33552672 | 0.04707550 | -2.64145615 |     |
| LMAN1L    | -0.33549462 | 0.04710010 | -2.64117134 |     |
| RHBG      | -0.33547690 | 0.04710900 | -2.64101415 |     |
| CNOT7     | 0.33544726  | 0.04713093 | 2.64075127  | yes |
| RPS10     | -0.33542993 | 0.04713941 | -2.64059756 |     |
| EXOC2     | 0.33541919  | 0.04714071 | 2.64050225  |     |
| DHRS3     | 0.33540595  | 0.04714473 | 2.64038480  |     |
| SLC11A2   | 0.33538119  | 0.04716134 | 2.64016524  |     |
| SCARNA6   | -0.33533555 | 0.04720079 | -2.63976042 |     |
| TMEM77    | 0.33530192  | 0.04722712 | 2.63946213  |     |
| ADAM11    | -0.33520064 | 0.04732756 | -2.63856393 |     |
| OR2A12    | -0.33511092 | 0.04741549 | -2.63776833 |     |
| NKX3-2    | -0.33506258 | 0.04745808 | -2.63733974 |     |
| C2orf42   | 0.33504457  | 0.04746737 | 2.63718005  |     |
| OR51Q1    | -0.33503488 | 0.04746753 | -2.63709409 |     |
| SGMS1     | 0.33499824  | 0.04749730 | 2.63676927  |     |
| TPM3      | 0.33496667  | 0.04751101 | 2.63648938  |     |
| USP3      | 0.33497472  | 0.04751101 | 2.63656071  |     |
| ITIH1     | -0.33494255 | 0.04751847 | -2.63627554 |     |
| POPDC3    | -0.33493228 | 0.04751847 | -2.63618450 |     |
| PAPOLG    | 0.33493126  | 0.04751847 | 2.63617540  |     |
| BZW2      | 0.33487718  | 0.04755139 | 2.63569605  |     |
| ANKFY1    | 0.33487271  | 0.04755139 | 2.63565637  |     |
| PSMB7     | 0.33487961  | 0.04755139 | 2.63571757  |     |
| RNF115    | 0.33485912  | 0.04755585 | 2.63553588  |     |
| ANKRD30A  | -0.33484063 | 0.04756570 | -2.63537202 |     |
| WDR47     | 0.33478802  | 0.04761311 | 2.63490569  | yes |
| NCR3      | -0.33475336 | 0.04763029 | -2.63459848 |     |
| OR5AP2    | -0.33476194 | 0.04763029 | -2.63467450 |     |
| NCBP2     | 0.33473709  | 0.04763772 | 2.63445423  |     |
| PSMB2     | 0.33469720  | 0.04767106 | 2.63410069  |     |
| NEUROD4   | -0.33468778 | 0.04767106 | -2.63401718 |     |
| C12orf64  | -0.33465137 | 0.04769104 | -2.63369453 |     |
| HYI       | -0.33465060 | 0.04769104 | -2.63368773 |     |
| NUP50     | 0.33459123  | 0.04769356 | 2.63316151  |     |
| CTSE      | -0.33462560 | 0.04769356 | -2.63346618 |     |
| TTC14     | 0.33461035  | 0.04769356 | 2.63333103  |     |
| EGF       | -0.33461250 | 0.04769356 | -2.63335003 |     |
| EPS8      | 0.33460357  | 0.04769356 | 2.63327094  | yes |
| KRTAP11-1 | -0.33459802 | 0.04769356 | -2.63322169 |     |

|              |             |            |             |
|--------------|-------------|------------|-------------|
| PLA2G2D      | -0.33457378 | 0.04770230 | -2.63300694 |
| MPO          | -0.33453865 | 0.04772471 | -2.63269564 |
| CBX2         | -0.33453444 | 0.04772471 | -2.63265833 |
| HMCN2        | -0.33447878 | 0.04777564 | -2.63216510 |
| RFX6         | -0.33445917 | 0.04778680 | -2.63199132 |
| TREML1       | -0.33442939 | 0.04780919 | -2.63172746 |
| ARFGEF1      | 0.33436240  | 0.04784899 | 2.63113394  |
| OR4S1        | -0.33434586 | 0.04784899 | -2.63098744 |
| STARD9       | -0.33437161 | 0.04784899 | -2.63121552 |
| USP26        | -0.33434653 | 0.04784899 | -2.63099331 |
| ACVR2A       | 0.33435810  | 0.04784899 | 2.63109585  |
| GNG4         | -0.33430748 | 0.04788092 | -2.63064739 |
| HOXC6        | -0.33422527 | 0.04796139 | -2.62991908 |
| FLJ44054     | -0.33417438 | 0.04799672 | -2.62946834 |
| SPTLC2       | 0.33418280  | 0.04799672 | 2.62954292  |
| TSPAN32      | -0.33411408 | 0.04800046 | -2.62893425 |
| NXNL2        | -0.33411975 | 0.04800046 | -2.62898449 |
| C3orf17      | 0.33412647  | 0.04800046 | 2.62904396  |
| GGNBP1       | -0.33411686 | 0.04800046 | -2.62895886 |
| RALA         | 0.33414421  | 0.04800046 | 2.62920114  |
| HIST1H2AG    | -0.33412325 | 0.04800046 | -2.62901542 |
| SNORD115-3   | -0.33407082 | 0.04803790 | -2.62855106 |
| EMID1        | -0.33393571 | 0.04812628 | -2.62735457 |
| PXDNL        | -0.33394209 | 0.04812628 | -2.62741110 |
| ASGR1        | -0.33393478 | 0.04812628 | -2.62734629 |
| PDGFR        | -0.33396936 | 0.04812628 | -2.62765254 |
| POF1B        | 0.33393428  | 0.04812628 | 2.62734190  |
| FAM20B       | 0.33394621  | 0.04812628 | 2.62744757  |
| LOC100132793 | 0.33392086  | 0.04812760 | 2.62722307  |
| GALNTL5      | -0.33390787 | 0.04812760 | -2.62710799 |
| KIF13B       | 0.33390468  | 0.04812760 | 2.62707977  |
| C18orf12     | -0.33388516 | 0.04813876 | -2.62690694 |
| DMRT1        | -0.33381840 | 0.04815329 | -2.62631585 |
| OR2H1        | -0.33384420 | 0.04815329 | -2.62654429 |
| LEP          | -0.33381532 | 0.04815329 | -2.62628850 |
| BECN1        | 0.33382674  | 0.04815329 | 2.62638965  |
| SAP30        | -0.33383299 | 0.04815329 | -2.62644498 |
| USP15        | 0.33384635  | 0.04815329 | 2.62656327  |
| CYP11B2      | -0.33376567 | 0.04815594 | -2.62584898 |
| FAM174A      | 0.33378904  | 0.04815594 | 2.62605583  |
| AQP2         | -0.33377072 | 0.04815594 | -2.62589367 |
| MS4A12       | -0.33378092 | 0.04815594 | -2.62598397 |
| DPEP2        | -0.33379380 | 0.04815594 | -2.62609800 |
| KRTAP23-1    | -0.33374557 | 0.04816777 | -2.62567098 |
| FADS2        | -0.33371687 | 0.04818915 | -2.62541690 |
| TMEM90A      | -0.33368989 | 0.04820864 | -2.62517800 |
| C5orf38      | -0.33366075 | 0.04821054 | -2.62492006 |
| SLC7A10      | -0.33365986 | 0.04821054 | -2.62491216 |
| ZCRB1        | 0.33367848  | 0.04821054 | 2.62507703  |
| SNCB         | -0.33362786 | 0.04823561 | -2.62462891 |



|              |             |            |             |     |
|--------------|-------------|------------|-------------|-----|
| PIF1         | -0.33360148 | 0.04825445 | -2.62439535 |     |
| IL11RA       | -0.33350162 | 0.04834358 | -2.62351149 |     |
| MANBA        | 0.33348365  | 0.04834358 | 2.62335241  |     |
| SS18L2       | 0.33348666  | 0.04834358 | 2.62337911  |     |
| PPP1R7       | 0.33348779  | 0.04834358 | 2.62338910  |     |
| MCART2       | -0.33346780 | 0.04835073 | -2.62321212 |     |
| EEF1A2       | -0.33344502 | 0.04835509 | -2.62301056 |     |
| SETD1A       | -0.33344840 | 0.04835509 | -2.62304044 |     |
| METRNL       | -0.33342298 | 0.04836606 | -2.62281544 |     |
| SNAI3        | -0.33341144 | 0.04836606 | -2.62271337 |     |
| PPP1R3C      | -0.33339749 | 0.04836606 | -2.62258986 |     |
| KIAA1853     | -0.33340689 | 0.04836606 | -2.62267304 |     |
| FLJ44674     | -0.33336233 | 0.04839473 | -2.62227875 |     |
| ELFN1        | -0.33331970 | 0.04843027 | -2.62190145 |     |
| OR13G1       | -0.33331161 | 0.04843027 | -2.62182992 |     |
| PTPRQ        | -0.33329807 | 0.04843487 | -2.62171007 |     |
| MARCH7       | 0.33328835  | 0.04843521 | 2.62162407  |     |
| GCLC         | 0.33326882  | 0.04844649 | 2.62145127  | yes |
| LOC100133439 | 0.33322218  | 0.04848803 | 2.62103856  |     |
| CLIP4        | 0.33320178  | 0.04850030 | 2.62085803  |     |
| INTS7        | 0.33316993  | 0.04852534 | 2.62057628  |     |
| SEBOX        | -0.33315692 | 0.04852937 | -2.62046117 |     |
| CCDC9        | -0.33313645 | 0.04853785 | -2.62028002 | yes |
| NAT8B        | -0.33313052 | 0.04853785 | -2.62022760 |     |
| LOC283711    | -0.33307221 | 0.04855049 | -2.61971173 |     |
| C21orf123    | -0.33309523 | 0.04855049 | -2.61991531 |     |
| RND3         | 0.33307765  | 0.04855049 | 2.61975981  |     |
| PITPNM2      | -0.33309091 | 0.04855049 | -2.61987709 | yes |
| RPL37        | 0.33309818  | 0.04855049 | 2.61994149  |     |
| SHROOM1      | -0.33304517 | 0.04857021 | -2.61947246 |     |
| PNMA3        | -0.33301826 | 0.04858978 | -2.61923445 |     |
| SPACA3       | -0.33297894 | 0.04862324 | -2.61888661 |     |
| DUSP14       | 0.33295685  | 0.04863744 | 2.61869122  |     |
| C14orf33     | -0.33288765 | 0.04867567 | -2.61807910 |     |
| EPOR         | -0.33288491 | 0.04867567 | -2.61805492 |     |
| HOXB9        | -0.33285699 | 0.04867567 | -2.61780796 |     |
| SLC6A19      | -0.33287099 | 0.04867567 | -2.61793173 |     |
| C1orf149     | 0.33290298  | 0.04867567 | 2.61821469  |     |
| CHMP4C       | 0.33286088  | 0.04867567 | 2.61784232  |     |
| CABP1        | -0.33290836 | 0.04867567 | -2.61826228 |     |
| MED28        | 0.33283115  | 0.04869410 | 2.61757939  |     |
| HSPB6        | -0.33280073 | 0.04870008 | -2.61731036 |     |
| GAD2         | -0.33279768 | 0.04870008 | -2.61728341 |     |
| PTCD2        | 0.33280048  | 0.04870008 | 2.61730812  |     |
| ZNF668       | -0.33278668 | 0.04870191 | -2.61718607 |     |
| SLC22A9      | -0.33275254 | 0.04872965 | -2.61688413 |     |
| FBN2         | -0.33271425 | 0.04874528 | -2.61654552 |     |
| LALBA        | -0.33272207 | 0.04874528 | -2.61661470 |     |
| HPS3         | 0.33271048  | 0.04874528 | 2.61651223  |     |
| C14orf104    | 0.33268836  | 0.04875957 | 2.61631657  |     |

|              |             |            |             |     |
|--------------|-------------|------------|-------------|-----|
| ZNF681       | 0.33265590  | 0.04878020 | 2.61602957  |     |
| ELOVL3       | -0.33265123 | 0.04878020 | -2.61598824 |     |
| DGKQ         | -0.33262421 | 0.04879999 | -2.61574936 |     |
| LYAR         | 0.33260458  | 0.04881150 | 2.61557578  |     |
| DCLRE1A      | 0.33258512  | 0.04882283 | 2.61540373  |     |
| FOXL1        | -0.33254353 | 0.04885899 | -2.61503597 |     |
| MMP25        | -0.33253268 | 0.04886067 | -2.61494006 |     |
| NUMBL        | -0.33251614 | 0.04886874 | -2.61479381 |     |
| RAB42        | -0.33247450 | 0.04890498 | -2.61442567 |     |
| HMGXB4       | 0.33244443  | 0.04890784 | 2.61415984  |     |
| WSCD1        | -0.33245693 | 0.04890784 | -2.61427040 |     |
| COG6         | 0.33242522  | 0.04890784 | 2.61399002  |     |
| SQRDL        | 0.33243080  | 0.04890784 | 2.61403938  |     |
| CAPZA1       | 0.33243656  | 0.04890784 | 2.61409024  |     |
| CNR2         | -0.33237371 | 0.04891570 | -2.61353467 |     |
| FERD3L       | -0.33234354 | 0.04891570 | -2.61326800 |     |
| GALC         | 0.33234898  | 0.04891570 | 2.61331605  |     |
| SIGLECP3     | -0.33236436 | 0.04891570 | -2.61345199 |     |
| ASIP         | -0.33240852 | 0.04891570 | -2.61384237 |     |
| ZNF484       | 0.33239601  | 0.04891570 | 2.61373182  |     |
| EED          | 0.33236790  | 0.04891570 | 2.61348334  |     |
| CP110        | 0.33235993  | 0.04891570 | 2.61341287  |     |
| LOC100131510 | -0.33231924 | 0.04893251 | -2.61305319 |     |
| CLCF1        | -0.33227658 | 0.04896234 | -2.61267609 |     |
| SH3GLB1      | 0.33227403  | 0.04896234 | 2.61265356  |     |
| OR4B1        | -0.33225747 | 0.04896512 | -2.61250721 |     |
| SYT3         | -0.33225291 | 0.04896512 | -2.61246688 |     |
| GLUD1        | 0.33221179  | 0.04899038 | 2.61210346  |     |
| LOC93432     | -0.33221775 | 0.04899038 | -2.61215613 |     |
| LOC100129476 | -0.33217360 | 0.04899821 | -2.61176592 |     |
| MMEL1        | -0.33215826 | 0.04899821 | -2.61163034 |     |
| ECHDC3       | -0.33216594 | 0.04899821 | -2.61169821 |     |
| SPACA1       | -0.33218241 | 0.04899821 | -2.61184381 |     |
| CMAH         | 0.33219117  | 0.04899821 | 2.61192118  |     |
| HOXD10       | -0.33213589 | 0.04900242 | -2.61143270 |     |
| TRIM54       | -0.33214070 | 0.04900242 | -2.61147515 | yes |
| OR8B3        | -0.33209493 | 0.04903801 | -2.61107068 |     |
| ATP4B        | -0.33203066 | 0.04909985 | -2.61050278 |     |
| F10          | -0.33200160 | 0.04912209 | -2.61024597 |     |
| YTHDC2       | 0.33188734  | 0.04924041 | 2.60923640  |     |
| MRGPRF       | -0.33186790 | 0.04925184 | -2.60906472 | yes |
| RTP2         | -0.33184719 | 0.04926472 | -2.60888170 |     |
| hCG_2018279  | -0.33173648 | 0.04934160 | -2.60790371 |     |
| FAM159B      | -0.33169523 | 0.04934160 | -2.60753934 |     |
| CSTF1        | 0.33166414  | 0.04934160 | 2.60726472  |     |
| SLC7A13      | -0.33172826 | 0.04934160 | -2.60783114 |     |
| ZNF100       | 0.33163975  | 0.04934160 | 2.60704927  |     |
| RDM1         | -0.33164911 | 0.04934160 | -2.60713194 |     |
| OR4E2        | -0.33176981 | 0.04934160 | -2.60819809 |     |
| C2orf64      | 0.33164013  | 0.04934160 | 2.60705268  |     |

|           |             |            |             |
|-----------|-------------|------------|-------------|
| C20orf111 | 0.33171577  | 0.04934160 | 2.60772081  |
| C8orf58   | -0.33169228 | 0.04934160 | -2.60751329 |
| POLR2D    | 0.33169860  | 0.04934160 | 2.60756909  |
| SNORA24   | -0.33165130 | 0.04934160 | -2.60715130 |
| TPM1      | -0.33173995 | 0.04934160 | -2.60793438 |
| ZSCAN16   | 0.33167153  | 0.04934160 | 2.60732999  |
| TLL2      | -0.33174868 | 0.04934160 | -2.60801151 |
| ALG11     | 0.33162025  | 0.04935315 | 2.60687702  |
| TRA2B     | 0.33159000  | 0.04937686 | 2.60660985  |
| RYR1      | -0.33157861 | 0.04937924 | -2.60650932 |
| IDI2      | -0.33156253 | 0.04938693 | -2.60636731 |
| KRT28     | -0.33154614 | 0.04939498 | -2.60622252 |
| MRAS      | -0.33152191 | 0.04939604 | -2.60600856 |
| ZC3H15    | 0.33150813  | 0.04939604 | 2.60588685  |
| NYX       | -0.33151685 | 0.04939604 | -2.60596387 |
| PRRG4     | 0.33152672  | 0.04939604 | 2.60605099  |
| TMEM66    | 0.33143129  | 0.04946201 | 2.60520826  |
| GLIS2     | -0.33143469 | 0.04946201 | -2.60523826 |
| ASB1      | 0.33140191  | 0.04948478 | 2.60494881  |
| MAP7D2    | -0.33138885 | 0.04948908 | -2.60483355 |
| KRTAP6-3  | -0.33136518 | 0.04949673 | -2.60462449 |
| TECTB     | -0.33136358 | 0.04949673 | -2.60461035 |
| CHP       | 0.33128947  | 0.04954567 | 2.60395603  |
| BRUNOL4   | -0.33130409 | 0.04954567 | -2.60408514 |
| AIFM1     | 0.33128336  | 0.04954567 | 2.60390208  |
| KIAA0020  | 0.33129174  | 0.04954567 | 2.60397612  |
| IRF7      | -0.33126796 | 0.04954659 | -2.60376611 |
| C20orf74  | 0.33125479  | 0.04954659 | 2.60364986  |
| SLC33A1   | 0.33125938  | 0.04954659 | 2.60369033  |
| ZNF460    | 0.33123236  | 0.04955106 | 2.60345178  |
| FREM3     | -0.33123574 | 0.04955106 | -2.60348167 |
| AVP       | -0.33121902 | 0.04955569 | -2.60333409 |
| CLCN2     | -0.33119061 | 0.04955648 | -2.60308324 |
| SEP2      | 0.33119795  | 0.04955648 | 2.60314804  |
| PRTN3     | -0.33120370 | 0.04955648 | -2.60319880 |
| FCRLB     | -0.33113212 | 0.04958091 | -2.60256690 |
| ADRA1B    | -0.33115793 | 0.04958091 | -2.60279476 |
| LGALS14   | -0.33113862 | 0.04958091 | -2.60262426 |
| GTPBP10   | 0.33114121  | 0.04958091 | 2.60264716  |
| C13orf34  | 0.33111167  | 0.04959363 | 2.60238634  |
| MRPS9     | 0.33109029  | 0.04960740 | 2.60219767  |
| LMAN2     | 0.33105488  | 0.04962663 | 2.60188511  |
| EBNA1BP2  | 0.33105614  | 0.04962663 | 2.60189623  |
| CCDC36    | -0.33103735 | 0.04963421 | -2.60173036 |
| PSKH2     | -0.33102975 | 0.04963421 | -2.60166327 |
| CENPL     | 0.33100295  | 0.04965416 | 2.60142673  |
| HSPA14    | 0.33094796  | 0.04970612 | 2.60094137  |
| ALOXE3    | -0.33089573 | 0.04973403 | -2.60048045 |
| SNAI1     | -0.33090245 | 0.04973403 | -2.60053977 |
| RBM39     | 0.33091110  | 0.04973403 | 2.60061608  |

|              |             |            |             |     |
|--------------|-------------|------------|-------------|-----|
| ALOX12B      | -0.33087641 | 0.04974551 | -2.60030994 |     |
| C18orf19     | 0.33086318  | 0.04975007 | 2.60019320  |     |
| IRS4         | -0.33084604 | 0.04975908 | -2.60004191 |     |
| GARNL4       | -0.33081584 | 0.04976395 | -2.59977538 |     |
| DPY19L1      | 0.33081412  | 0.04976395 | 2.59976027  |     |
| SCARNA17     | -0.33081866 | 0.04976395 | -2.59980029 |     |
| RPL29P31     | -0.33078780 | 0.04976454 | -2.59952799 |     |
| LOC285453    | 0.33080247  | 0.04976454 | 2.59965745  |     |
| MTMR3        | 0.33078599  | 0.04976454 | 2.59951198  |     |
| GBA3         | -0.33073555 | 0.04981143 | -2.59906690 |     |
| OR5D18       | -0.33069538 | 0.04981504 | -2.59871254 |     |
| TSPAN15      | 0.33068638  | 0.04981504 | 2.59863309  |     |
| YIPF6        | 0.33069040  | 0.04981504 | 2.59866855  |     |
| MYH7         | -0.33070826 | 0.04981504 | -2.59882615 |     |
| WBSCR16      | -0.33069614 | 0.04981504 | -2.59871920 |     |
| CYP2R1       | 0.33065448  | 0.04983653 | 2.59835160  |     |
| BTNL9        | -0.33064511 | 0.04983653 | -2.59826898 |     |
| PHKB         | 0.33063791  | 0.04983653 | 2.59820545  |     |
| SNORA71D     | -0.33063072 | 0.04983653 | -2.59814206 |     |
| KLHL30       | -0.33056598 | 0.04989774 | -2.59757087 |     |
| AVPR2        | -0.33055857 | 0.04989774 | -2.59750548 |     |
| PRM2         | -0.33054395 | 0.04990393 | -2.59737650 |     |
| RLF          | 0.33053174  | 0.04990738 | 2.59726879  |     |
| EIF1         | 0.33050347  | 0.04992689 | 2.59701940  |     |
| EIF4G2       | 0.33048075  | 0.04992689 | 2.59681899  | yes |
| C19orf54     | -0.33045063 | 0.04992689 | -2.59655332 |     |
| HNF4G        | 0.33045036  | 0.04992689 | 2.59655096  |     |
| APOH         | -0.33047601 | 0.04992689 | -2.59677721 |     |
| LOC392364    | -0.33047990 | 0.04992689 | -2.59681146 |     |
| NIPA2        | 0.33045523  | 0.04992689 | 2.59659391  |     |
| CSH2         | -0.33043209 | 0.04993249 | -2.59638979 |     |
| G3BP2        | 0.33042710  | 0.04993249 | 2.59634578  |     |
| RAB2A        | 0.33041697  | 0.04993359 | 2.59625645  |     |
| C10orf49     | -0.33038609 | 0.04993744 | -2.59598406 |     |
| C14orf138    | 0.33039907  | 0.04993744 | 2.59609855  |     |
| COL25A1      | -0.33039463 | 0.04993744 | -2.59605936 |     |
| VCP          | 0.33037434  | 0.04994040 | 2.59588041  |     |
| TTY14        | -0.33035478 | 0.04995224 | -2.59570792 |     |
| GPR137B      | 0.33034172  | 0.04995669 | 2.59559267  |     |
| HELQ         | 0.33029948  | 0.04999439 | 2.59522017  |     |
| LOC100131373 | -0.33014890 | 0.05006178 | -2.59389222 |     |
| PIBF1        | 0.33018596  | 0.05006178 | 2.59421902  |     |
| ZPLD1        | -0.33017388 | 0.05006178 | -2.59411257 |     |
| ADK          | 0.33015750  | 0.05006178 | 2.59396813  |     |
| C11orf84     | -0.33018157 | 0.05006178 | -2.59418032 |     |
| FAM71B       | -0.33021844 | 0.05006178 | -2.59450550 |     |
| WDR5B        | 0.33019334  | 0.05006178 | 2.59428414  |     |
| TMEM181      | 0.33020341  | 0.05006178 | 2.59437291  |     |
| CCDC154      | -0.33016682 | 0.05006178 | -2.59405024 |     |
| FZD9         | -0.33016356 | 0.05006178 | -2.59402151 |     |

|           |             |            |             |
|-----------|-------------|------------|-------------|
| CBLN2     | -0.33012458 | 0.05007910 | -2.59367779 |
| TMPRSS4   | 0.33009269  | 0.05010507 | 2.59339659  |
| ABT1      | 0.33005060  | 0.05014270 | 2.59302548  |
| CCDC129   | -0.33003265 | 0.05015276 | -2.59286725 |
| SLC38A8   | -0.33001727 | 0.05015990 | -2.59273162 |
| DHDH      | -0.33000775 | 0.05016034 | -2.59264771 |
| UNC84A    | 0.32999066  | 0.05016943 | 2.59249706  |
| GALP      | -0.32997938 | 0.05017188 | -2.59239758 |
| CHRN1     | -0.32991971 | 0.05018919 | -2.59187155 |
| KIAA0146  | 0.32991210  | 0.05018919 | 2.59180446  |
| GRK4      | -0.32990643 | 0.05018919 | -2.59175451 |
| MALAT1    | 0.32992306  | 0.05018919 | 2.59190110  |
| SDHA      | 0.32992948  | 0.05018919 | 2.59195764  |
| SLC6A5    | -0.32995301 | 0.05018919 | -2.59216514 |
| ACYP2     | 0.32990035  | 0.05018919 | 2.59170084  |
| POU2F3    | -0.32987494 | 0.05020781 | -2.59147689 |
| SERPINA11 | -0.32980983 | 0.05026065 | -2.59090294 |
| CTRB2     | -0.32981116 | 0.05026065 | -2.59091470 |
| HIST2H2BF | 0.32980140  | 0.05026065 | 2.59082860  |
| KRTAP10-9 | -0.32979061 | 0.05026255 | -2.59073354 |
| WDR42B    | -0.32977789 | 0.05026274 | -2.59062137 |
| HGFAC     | -0.32977222 | 0.05026274 | -2.59057146 |
| CFHR3     | -0.32971662 | 0.05028099 | -2.59008140 |
| CYLD      | 0.32970359  | 0.05028099 | 2.58996655  |
| OR8U1     | -0.32972096 | 0.05028099 | -2.59011967 |
| GFOD1     | -0.32971013 | 0.05028099 | -2.59002420 |
| MRRF      | 0.32972995  | 0.05028099 | 2.59019886  |
| SLC22A8   | -0.32970164 | 0.05028099 | -2.58994931 |
| ZNF396    | 0.32969198  | 0.05028143 | 2.58986426  |
| PAX4      | -0.32967395 | 0.05028143 | -2.58970532 |
| SERPIN3   | 0.32968044  | 0.05028143 | 2.58976249  |
| STIL      | 0.32965783  | 0.05028290 | 2.58956324  |
| UTF1      | -0.32964625 | 0.05028290 | -2.58946116 |
| SNX21     | -0.32964538 | 0.05028290 | -2.58945353 |
| FSHB      | -0.32960722 | 0.05031617 | -2.58911722 |
| KCTD3     | 0.32959713  | 0.05031731 | 2.58902830  |
| LTA4H     | 0.32958174  | 0.05032452 | 2.58889270  |
| ZNF488    | -0.32953109 | 0.05037213 | -2.58844638 |
| HTR7      | -0.32946996 | 0.05043179 | -2.58790773 |
| LOC221442 | 0.32945467  | 0.05043891 | 2.58777294  |
| KCNJ14    | -0.32943557 | 0.05045039 | -2.58760468 |
| PSMC4     | 0.32940137  | 0.05047921 | 2.58730340  |
| AMELY     | -0.32937909 | 0.05049436 | -2.58710709 |
| GPR112    | -0.32923292 | 0.05055800 | -2.58581940 |
| DR1       | 0.32923601  | 0.05055800 | 2.58584658  |
| MED19     | -0.32923418 | 0.05055800 | -2.58583048 |
| FAM181B   | -0.32923491 | 0.05055800 | -2.58583689 |
| FOXO1     | -0.32926830 | 0.05055800 | -2.58613107 |
| LACE1     | 0.32928625  | 0.05055800 | 2.58628917  |
| TAS2R39   | -0.32923920 | 0.05055800 | -2.58587473 |

|            |             |            |             |     |
|------------|-------------|------------|-------------|-----|
| CD248      | -0.32929328 | 0.05055800 | -2.58635113 |     |
| STXBP3     | 0.32928353  | 0.05055800 | 2.58626521  |     |
| UCN2       | -0.32931366 | 0.05055800 | -2.58653065 |     |
| MED6       | 0.32921363  | 0.05056974 | 2.58564947  | yes |
| LARP4      | 0.32918724  | 0.05057623 | 2.58541703  |     |
| FCER2      | -0.32919882 | 0.05057623 | -2.58551899 |     |
| NTN3       | -0.32918079 | 0.05057623 | -2.58536020 |     |
| CLDN24     | -0.32915138 | 0.05059963 | -2.58510109 |     |
| DPP8       | 0.32913555  | 0.05060740 | 2.58496168  |     |
| COL5A3     | -0.32912343 | 0.05061093 | -2.58485490 |     |
| R3HDML     | -0.32911235 | 0.05061167 | -2.58475738 |     |
| S100A7A    | -0.32908656 | 0.05061167 | -2.58453018 |     |
| LOC348926  | -0.32910330 | 0.05061167 | -2.58467763 |     |
| CEP97      | 0.32909384  | 0.05061167 | 2.58459433  |     |
| SNAPC3     | 0.32902496  | 0.05067211 | 2.58398771  |     |
| SFRS12IP1  | 0.32898647  | 0.05069336 | 2.58364875  |     |
| PACS1      | -0.32898319 | 0.05069336 | -2.58361979 |     |
| PP8961     | -0.32897934 | 0.05069336 | -2.58358596 |     |
| KCNN3      | -0.32896994 | 0.05069377 | -2.58350317 |     |
| LPCAT3     | 0.32892478  | 0.05070400 | 2.58310543  |     |
| MYL12A     | 0.32891339  | 0.05070400 | 2.58300514  |     |
| KLB        | -0.32894005 | 0.05070400 | -2.58323992 |     |
| GRIN2D     | -0.32889023 | 0.05070400 | -2.58280117 |     |
| OR4K17     | -0.32890804 | 0.05070400 | -2.58295802 |     |
| CYTL1      | -0.32895136 | 0.05070400 | -2.58333950 |     |
| PTCD3      | 0.32888189  | 0.05070400 | 2.58272780  |     |
| HIRA       | 0.32888298  | 0.05070400 | 2.58273740  |     |
| EIF3H      | 0.32887970  | 0.05070400 | 2.58270848  |     |
| GBE1       | 0.32882324  | 0.05075861 | 2.58221138  |     |
| DKKL1      | -0.32881228 | 0.05076083 | -2.58211489 |     |
| FLJ40142   | -0.32878766 | 0.05077880 | -2.58189811 |     |
| NDUFA3     | -0.32877841 | 0.05077906 | -2.58181664 |     |
| SLC35F1    | -0.32873159 | 0.05079649 | -2.58140439 |     |
| AOF2       | 0.32872078  | 0.05079649 | 2.58130927  |     |
| BRP44      | 0.32871816  | 0.05079649 | 2.58128619  | yes |
| SLC27A6    | -0.32873646 | 0.05079649 | -2.58144730 |     |
| KRTAP19-1  | -0.32872380 | 0.05079649 | -2.58133588 |     |
| HBII-52-24 | -0.32864560 | 0.05080739 | -2.58064742 |     |
| LOC388199  | -0.32866774 | 0.05080739 | -2.58084230 |     |
| PCDH8      | -0.32865192 | 0.05080739 | -2.58070302 |     |
| DCTN4      | 0.32869042  | 0.05080739 | 2.58104200  |     |
| KLHL9      | 0.32864790  | 0.05080739 | 2.58066767  |     |
| SLC3A2     | 0.32866173  | 0.05080739 | 2.58078937  |     |
| SGK493     | -0.32867972 | 0.05080739 | -2.58094781 | yes |
| MDN1       | 0.32861956  | 0.05081664 | 2.58041817  |     |
| F2RL3      | -0.32861978 | 0.05081664 | -2.58042009 | yes |
| BATF3      | -0.32858503 | 0.05084607 | -2.58011419 |     |
| PION       | 0.32857066  | 0.05085226 | 2.57998770  |     |
| MED23      | 0.32855292  | 0.05086233 | 2.57983158  |     |
| SEP3       | -0.32854052 | 0.05086625 | -2.57972241 |     |

|              |             |            |             |     |
|--------------|-------------|------------|-------------|-----|
| RIT1         | 0.32851007  | 0.05088061 | 2.57945438  |     |
| TSPYL2       | -0.32851360 | 0.05088061 | -2.57948547 |     |
| LOC100128576 | 0.32846577  | 0.05091357 | 2.57906448  |     |
| FLJ41170     | -0.32846351 | 0.05091357 | -2.57904462 |     |
| RASGEF1B     | 0.32843883  | 0.05093168 | 2.57882739  |     |
| C15orf43     | -0.32839014 | 0.05096713 | -2.57839888 |     |
| KLHL5        | 0.32839605  | 0.05096713 | 2.57845086  |     |
| PAX2         | -0.32837897 | 0.05096966 | -2.57830054 |     |
| GPRASP2      | -0.32835787 | 0.05098364 | -2.57811488 |     |
| RXFP4        | -0.32832548 | 0.05101069 | -2.57782983 |     |
| SNORD113-4   | -0.32830801 | 0.05102049 | -2.57767608 |     |
| MTMR1        | 0.32829286  | 0.05102762 | 2.57754275  |     |
| MYOF         | 0.32827195  | 0.05104140 | 2.57735880  |     |
| CYP3A43      | -0.32826147 | 0.05104314 | -2.57726652 |     |
| OPRL1        | -0.32824939 | 0.05104672 | -2.57716026 |     |
| ASF1A        | 0.32821465  | 0.05107651 | 2.57685461  |     |
| CCR9         | -0.32820317 | 0.05107941 | -2.57675357 |     |
| C21orf129    | -0.32817059 | 0.05109633 | -2.57646686 |     |
| NDUFC2       | 0.32817223  | 0.05109633 | 2.57648137  |     |
| CCT6B        | 0.32811350  | 0.05113124 | 2.57596464  |     |
| PLS1         | 0.32811735  | 0.05113124 | 2.57599846  |     |
| RNF112       | -0.32811572 | 0.05113124 | -2.57598414 |     |
| C7orf47      | -0.32806391 | 0.05116348 | -2.57552830 |     |
| POU4F2       | -0.32804082 | 0.05116348 | -2.57532515 |     |
| C7orf43      | -0.32804450 | 0.05116348 | -2.57535755 |     |
| MRPL11       | -0.32805682 | 0.05116348 | -2.57546596 |     |
| KCNH7        | -0.32804334 | 0.05116348 | -2.57534736 |     |
| IMPG1        | -0.32798251 | 0.05122066 | -2.57481227 |     |
| C10orf125    | -0.32795853 | 0.05123808 | -2.57460126 |     |
| HPRT1        | 0.32793401  | 0.05125612 | 2.57438564  |     |
| TESSP1       | -0.32791968 | 0.05126097 | -2.57425953 |     |
| C14orf142    | 0.32791190  | 0.05126097 | 2.57419114  |     |
| ZIC3         | -0.32788355 | 0.05128347 | -2.57394179 |     |
| DPM1         | 0.32786634  | 0.05129305 | 2.57379038  |     |
| S100A7       | -0.32785699 | 0.05129351 | -2.57370811 |     |
| OR5AS1       | -0.32783736 | 0.05130590 | -2.57353545 |     |
| YWHAQ        | 0.32777311  | 0.05134888 | 2.57297037  |     |
| COX15        | 0.32776453  | 0.05134888 | 2.57289498  |     |
| C10orf25     | -0.32777076 | 0.05134888 | -2.57294970 |     |
| REG1A        | -0.32778563 | 0.05134888 | -2.57308054 | yes |
| LOC100133424 | 0.32774672  | 0.05134990 | 2.57273834  |     |
| C9orf3       | 0.32774576  | 0.05134990 | 2.57272985  |     |
| NTNG2        | -0.32773246 | 0.05135495 | -2.57261288 |     |
| LOC646316    | 0.32772243  | 0.05135622 | 2.57252466  |     |
| RPL3L        | -0.32770660 | 0.05136367 | -2.57238551 |     |
| SLC18A3      | -0.32769812 | 0.05136367 | -2.57231091 |     |
| ZIM2         | -0.32766523 | 0.05137073 | -2.57202165 |     |
| KCNIP1       | -0.32767245 | 0.05137073 | -2.57208522 |     |
| SRP14        | 0.32767035  | 0.05137073 | 2.57206673  |     |
| OPA1         | 0.32764370  | 0.05137245 | 2.57183238  |     |



|              |             |            |             |     |
|--------------|-------------|------------|-------------|-----|
| POLR2C       | 0.32762801  | 0.05137245 | 2.57169438  |     |
| TMEM50B      | 0.32763668  | 0.05137245 | 2.57177065  |     |
| WISP1        | -0.32764062 | 0.05137245 | -2.57180531 |     |
| TMEM192      | 0.32759453  | 0.05140098 | 2.57139999  |     |
| AMBN         | -0.32755335 | 0.05142476 | -2.57103796 |     |
| WIPI2        | 0.32754728  | 0.05142476 | 2.57098455  |     |
| EXOSC3       | 0.32755000  | 0.05142476 | 2.57100850  |     |
| SNORA29      | 0.32753070  | 0.05143366 | 2.57083881  |     |
| HNRNPH1      | 0.32751369  | 0.05144306 | 2.57068922  |     |
| WDR64        | -0.32749098 | 0.05145150 | -2.57048951 |     |
| ABCC13       | -0.32744379 | 0.05145150 | -2.57007470 |     |
| MBL2         | -0.32745207 | 0.05145150 | -2.57014750 |     |
| PRH1         | -0.32748368 | 0.05145150 | -2.57042533 |     |
| USP35        | -0.32746132 | 0.05145150 | -2.57022882 |     |
| NCOA4        | 0.32743510  | 0.05145150 | 2.56999823  |     |
| ADAMTS4      | -0.32744574 | 0.05145150 | -2.57009179 |     |
| MORF4L2      | 0.32746800  | 0.05145150 | 2.57028754  | yes |
| CP           | 0.32741890  | 0.05145997 | 2.56985588  |     |
| ADAM28       | 0.32740187  | 0.05146388 | 2.56970612  |     |
| BRWD2        | 0.32739772  | 0.05146388 | 2.56966964  |     |
| TTY11        | -0.32738561 | 0.05146761 | -2.56956317 |     |
| RCBTB2       | 0.32735340  | 0.05149471 | 2.56928006  |     |
| COPG2        | 0.32730829  | 0.05150577 | 2.56888348  |     |
| RECQL        | 0.32731775  | 0.05150577 | 2.56896662  |     |
| CCL7         | -0.32730876 | 0.05150577 | -2.56888759 |     |
| PTER         | 0.32731734  | 0.05150577 | 2.56896307  |     |
| LOC100131507 | -0.32724928 | 0.05155080 | -2.56836479 |     |
| DLEU1        | 0.32722512  | 0.05155080 | 2.56815245  |     |
| KLHL4        | -0.32723619 | 0.05155080 | -2.56824974 | yes |
| NPAL3        | 0.32722865  | 0.05155080 | 2.56818351  |     |
| FLJ22184     | -0.32725968 | 0.05155080 | -2.56845622 |     |
| ZDHHC20      | 0.32721597  | 0.05155111 | 2.56807202  |     |
| PTH1R        | -0.32719885 | 0.05156069 | -2.56792154 |     |
| LOC100128510 | 0.32714976  | 0.05157775 | 2.56749012  |     |
| PELI3        | -0.32714865 | 0.05157775 | -2.56748035 |     |
| SCGB2A2      | -0.32715559 | 0.05157775 | -2.56754135 |     |
| UBE2Q2       | 0.32716326  | 0.05157775 | 2.56760875  |     |
| GFRA2        | -0.32713633 | 0.05158176 | -2.56737203 |     |
| KRBA1        | -0.32708329 | 0.05163320 | -2.56690592 |     |
| TPD52L3      | -0.32706695 | 0.05164189 | -2.56676235 |     |
| ESR1         | -0.32702899 | 0.05167580 | -2.56642877 |     |
| CD300C       | -0.32700615 | 0.05167597 | -2.56622810 |     |
| ESM1         | -0.32698884 | 0.05167597 | -2.56607597 |     |
| HABP4        | -0.32701402 | 0.05167597 | -2.56629720 |     |
| DSCR9        | -0.32699723 | 0.05167597 | -2.56614967 |     |
| ODF2L        | 0.32697725  | 0.05167597 | 2.56597414  |     |
| ALX4         | -0.32697559 | 0.05167597 | -2.56595956 |     |
| RAB18        | 0.32694228  | 0.05170448 | 2.56566681  |     |
| RP11-49G10.8 | -0.32691906 | 0.05172122 | -2.56546285 |     |
| KISS1        | -0.32688031 | 0.05175610 | -2.56512235 |     |

|               |             |            |             |     |
|---------------|-------------|------------|-------------|-----|
| FXYD1         | -0.32685212 | 0.05177866 | -2.56487467 |     |
| HOPX          | -0.32683885 | 0.05178381 | -2.56475806 |     |
| C1GALT1C1     | 0.32681206  | 0.05179439 | 2.56452271  |     |
| NOL7          | 0.32681679  | 0.05179439 | 2.56456425  |     |
| LRRC4B        | -0.32676594 | 0.05183793 | -2.56411753 | yes |
| COPS8         | 0.32674798  | 0.05184856 | 2.56395979  |     |
| RPL29P12      | -0.32673887 | 0.05184886 | -2.56387972 |     |
| WDSUB1        | 0.32670796  | 0.05186327 | 2.56360817  |     |
| C15orf51      | -0.32670787 | 0.05186327 | -2.56360745 |     |
| FAM73A        | 0.32669111  | 0.05186327 | 2.56346021  |     |
| HORMAD1       | 0.32669551  | 0.05186327 | 2.56349886  |     |
| C20orf197     | -0.32667162 | 0.05186537 | -2.56328898 |     |
| KIR2DL4       | -0.32667456 | 0.05186537 | -2.56331481 |     |
| DKFZp434E1119 | -0.32665987 | 0.05186875 | -2.56318581 |     |
| TSPYL3        | -0.32664149 | 0.05187176 | -2.56302432 |     |
| ZBTB1         | 0.32661982  | 0.05187176 | 2.56283396  |     |
| C3orf27       | -0.32661307 | 0.05187176 | -2.56277470 |     |
| GYG1          | 0.32661882  | 0.05187176 | 2.56282516  |     |
| IPO11         | 0.32663530  | 0.05187176 | 2.56296994  |     |
| AOF1          | 0.32658501  | 0.05188390 | 2.56252823  |     |
| OLR1          | -0.32658503 | 0.05188390 | -2.56252845 |     |
| ORC4L         | 0.32655702  | 0.05190629 | 2.56228243  |     |
| CTRC          | -0.32648915 | 0.05194339 | -2.56168634 |     |
| SMAD2         | 0.32643309  | 0.05194339 | 2.56119399  |     |
| PLOD1         | -0.32650462 | 0.05194339 | -2.56182222 |     |
| PPP1CB        | 0.32641936  | 0.05194339 | 2.56107341  |     |
| PPP1CC        | 0.32642809  | 0.05194339 | 2.56115007  |     |
| KTELC1        | 0.32646891  | 0.05194339 | 2.56150856  |     |
| RPL5          | 0.32646332  | 0.05194339 | 2.56145947  |     |
| SCN5A         | -0.32647195 | 0.05194339 | -2.56153524 |     |
| ARAP3         | -0.32648250 | 0.05194339 | -2.56162792 |     |
| TAF4          | -0.32644640 | 0.05194339 | -2.56131091 |     |
| TSG101        | 0.32646973  | 0.05194339 | 2.56151579  |     |
| UBE2G1        | 0.32643200  | 0.05194339 | 2.56118439  |     |
| PIGL          | 0.32637459  | 0.05198547 | 2.56068026  |     |
| KRR1          | 0.32634358  | 0.05200482 | 2.56040795  |     |
| OR4C11        | -0.32634042 | 0.05200482 | -2.56038027 |     |
| MOBK13        | 0.32627159  | 0.05202351 | 2.55977588  |     |
| PLA2G5        | -0.32631056 | 0.05202351 | -2.56011808 |     |
| TRPV5         | -0.32627233 | 0.05202351 | -2.55978236 |     |
| LOC645769     | -0.32629084 | 0.05202351 | -2.55994488 |     |
| SLC14A1       | -0.32628080 | 0.05202351 | -2.55985673 |     |
| SLC16A6       | 0.32628393  | 0.05202351 | 2.55988421  |     |
| C3orf46       | -0.32625024 | 0.05203820 | -2.55958843 |     |
| RP13-102H20.1 | -0.32621686 | 0.05205667 | -2.55929533 |     |
| RP2           | 0.32622068  | 0.05205667 | 2.55932890  | yes |
| CHMP1B        | 0.32617109  | 0.05208968 | 2.55889349  |     |
| LOC729898     | -0.32617958 | 0.05208968 | -2.55896807 |     |
| JUND          | -0.32614982 | 0.05210430 | -2.55870678 |     |
| C6orf208      | -0.32610077 | 0.05215152 | -2.55827616 |     |

|              |             |            |             |     |
|--------------|-------------|------------|-------------|-----|
| MOG          | -0.32609040 | 0.05215335 | -2.55818517 |     |
| CCDC102A     | -0.32606996 | 0.05216702 | -2.55800571 |     |
| CCDC59       | 0.32601549  | 0.05222065 | 2.55752755  |     |
| PSPN         | -0.32595135 | 0.05227536 | -2.55696456 |     |
| ACVRL1       | -0.32595664 | 0.05227536 | -2.55701097 | yes |
| STXBP1       | -0.32594022 | 0.05227809 | -2.55686693 |     |
| MC2R         | -0.32592530 | 0.05228530 | -2.55673593 |     |
| LCN1         | -0.32590455 | 0.05229936 | -2.55655382 |     |
| ZNF622       | 0.32585971  | 0.05234176 | 2.55616032  |     |
| FCAMR        | -0.32581207 | 0.05238750 | -2.55574223 |     |
| EIF4A1       | 0.32578059  | 0.05239352 | 2.55546596  |     |
| LOC100133412 | -0.32578470 | 0.05239352 | -2.55550201 |     |
| SAR1B        | 0.32579735  | 0.05239352 | 2.55561300  |     |
| NEU4         | -0.32576170 | 0.05239507 | -2.55530020 |     |
| HCN3         | -0.32576979 | 0.05239507 | -2.55537120 |     |
| C17orf74     | -0.32575143 | 0.05239682 | -2.55521006 |     |
| LIN28B       | -0.32574179 | 0.05239784 | -2.55512545 |     |
| KCNMB1       | -0.32570990 | 0.05242506 | -2.55484560 |     |
| PRLHR        | -0.32568630 | 0.05244252 | -2.55463852 |     |
| ZFP30        | 0.32566913  | 0.05244477 | 2.55448788  |     |
| IL1RAPL2     | -0.32564928 | 0.05244477 | -2.55431370 |     |
| LOC388282    | -0.32565188 | 0.05244477 | -2.55433648 |     |
| ECSIT        | -0.32565057 | 0.05244477 | -2.55432502 |     |
| GPR172B      | -0.32563258 | 0.05245411 | -2.55416719 |     |
| BRWD3        | 0.32561036  | 0.05246997 | 2.55397218  |     |
| AQP6         | -0.32558400 | 0.05249070 | -2.55374097 |     |
| PRAME        | -0.32556600 | 0.05250158 | -2.55358306 |     |
| TSGA10IP     | -0.32555416 | 0.05250521 | -2.55347911 |     |
| COLEC10      | -0.32551825 | 0.05253723 | -2.55316412 |     |
| THADA        | 0.32548441  | 0.05256682 | 2.55286726  |     |
| SLC26A1      | -0.32547174 | 0.05256712 | -2.55275604 |     |
| FASTKD1      | 0.32546662  | 0.05256712 | 2.55271121  |     |
| UBE2K        | 0.32540759  | 0.05262650 | 2.55219334  |     |
| ANKRD18A     | 0.32539369  | 0.05263257 | 2.55207139  |     |
| OR4D5        | -0.32537591 | 0.05264323 | -2.55191543 |     |
| TTC17        | 0.32535781  | 0.05265426 | 2.55175673  |     |
| FAM65C       | -0.32534035 | 0.05266456 | -2.55160350 |     |
| OMA1         | 0.32531915  | 0.05267120 | 2.55141755  | yes |
| FLJ42957     | -0.32531721 | 0.05267120 | -2.55140061 | yes |
| RPS6KL1      | -0.32524349 | 0.05274670 | -2.55075400 |     |
| JRKL         | 0.32523588  | 0.05274670 | 2.55068727  |     |
| C9orf72      | 0.32522280  | 0.05275182 | 2.55057257  |     |
| TEF          | -0.32520082 | 0.05276748 | -2.55037978 |     |
| SH3RF3       | -0.32517809 | 0.05278404 | -2.55018040 |     |
| SWAP70       | 0.32516300  | 0.05279155 | 2.55004808  |     |
| ACTN2        | -0.32515068 | 0.05279577 | -2.54994005 |     |
| TRIML2       | -0.32513587 | 0.05280295 | -2.54981020 |     |
| TMEM139      | -0.32511520 | 0.05281708 | -2.54962892 |     |
| GPR25        | -0.32507901 | 0.05283923 | -2.54931160 |     |
| MOS          | -0.32508055 | 0.05283923 | -2.54932512 |     |

|           |             |            |             |     |
|-----------|-------------|------------|-------------|-----|
| RAB1A     | 0.32506306  | 0.05284778 | 2.54917173  |     |
| LCE3B     | -0.32501767 | 0.05289124 | -2.54877368 |     |
| MTF1      | 0.32499971  | 0.05290217 | 2.54861624  | yes |
| PSMD5     | 0.32489909  | 0.05301126 | 2.54773405  |     |
| ZNF75D    | 0.32484821  | 0.05306135 | 2.54728804  |     |
| C2orf21   | -0.32483634 | 0.05306508 | -2.54718392 |     |
| VAX2      | -0.32481581 | 0.05307910 | -2.54700398 |     |
| HARS2     | 0.32478751  | 0.05310238 | 2.54675587  |     |
| OR10G7    | -0.32473516 | 0.05315430 | -2.54629697 |     |
| DEFB112   | -0.32468724 | 0.05318092 | -2.54587694 |     |
| CATSPER4  | -0.32468660 | 0.05318092 | -2.54587134 |     |
| IQSEC3    | -0.32470281 | 0.05318092 | -2.54601341 |     |
| IL17F     | -0.32465134 | 0.05319834 | -2.54556229 |     |
| C6orf170  | 0.32465206  | 0.05319834 | 2.54556861  |     |
| MSX2      | -0.32464508 | 0.05319834 | -2.54550741 |     |
| TMEM49    | 0.32463705  | 0.05319834 | 2.54543709  |     |
| NOLC1     | 0.32461138  | 0.05321854 | 2.54521204  |     |
| MBD6      | -0.32455477 | 0.05324441 | -2.54471599 |     |
| ZNF611    | 0.32457295  | 0.05324441 | 2.54487528  |     |
| TP53INP1  | 0.32455895  | 0.05324441 | 2.54475262  |     |
| USP34     | 0.32456247  | 0.05324441 | 2.54478340  |     |
| LCE3D     | -0.32454194 | 0.05324931 | -2.54460354 |     |
| RFC2      | 0.32450426  | 0.05327345 | 2.54427334  |     |
| PRPF4B    | 0.32450459  | 0.05327345 | 2.54427615  |     |
| NDST4     | -0.32448249 | 0.05328902 | -2.54408255 |     |
| GOLT1A    | -0.32445261 | 0.05331428 | -2.54382066 |     |
| OR56A4    | -0.32437949 | 0.05335219 | -2.54317996 |     |
| PCBD1     | 0.32440275  | 0.05335219 | 2.54338375  |     |
| LOC647086 | -0.32437728 | 0.05335219 | -2.54316062 |     |
| NPHS2     | -0.32438275 | 0.05335219 | -2.54320858 |     |
| SLC28A2   | -0.32438529 | 0.05335219 | -2.54323077 |     |
| SIGLEC5   | -0.32436172 | 0.05336038 | -2.54302427 |     |
| PTS       | 0.32435071  | 0.05336312 | 2.54292784  |     |
| ST13      | 0.32433456  | 0.05337201 | 2.54278632  |     |
| C1QTNF2   | -0.32432143 | 0.05337419 | -2.54267128 |     |
| PHF1      | -0.32431533 | 0.05337419 | -2.54261783 |     |
| PAK4      | -0.32430069 | 0.05337449 | -2.54248952 |     |
| MAGED2    | 0.32429767  | 0.05337449 | 2.54246314  |     |
| ADRA1D    | -0.32427746 | 0.05338824 | -2.54228600 |     |
| KARS      | 0.32422480  | 0.05344078 | 2.54182464  |     |
| ENOPH1    | 0.32420903  | 0.05344922 | 2.54168656  |     |
| USP16     | 0.32412513  | 0.05351036 | 2.54095159  |     |
| SEP8      | -0.32411444 | 0.05351036 | -2.54085794 |     |
| DNMBP     | 0.32411742  | 0.05351036 | 2.54088404  |     |
| LOC643997 | -0.32411978 | 0.05351036 | -2.54090470 |     |
| IKBKAP    | 0.32413977  | 0.05351036 | 2.54107977  |     |
| BHLHA15   | -0.32407253 | 0.05353646 | -2.54049084 |     |
| GK5       | 0.32406657  | 0.05353646 | 2.54043858  |     |
| PILRA     | -0.32406701 | 0.05353646 | -2.54044249 |     |
| APOC4     | -0.32405520 | 0.05353967 | -2.54033899 |     |

|              |             |            |             |     |
|--------------|-------------|------------|-------------|-----|
| TOR2A        | -0.32403439 | 0.05355418 | -2.54015670 |     |
| FNTA         | 0.32396648  | 0.05361472 | 2.53956193  |     |
| SLC16A12     | -0.32396921 | 0.05361472 | -2.53958583 |     |
| OR10Q1       | -0.32395195 | 0.05362172 | -2.53943472 |     |
| RXFP3        | -0.32393224 | 0.05363494 | -2.53926210 |     |
| LHCGR        | -0.32391945 | 0.05363986 | -2.53915007 |     |
| ANKRD9       | -0.32387520 | 0.05368252 | -2.53876253 |     |
| NUDT5        | 0.32384700  | 0.05370594 | 2.53851558  |     |
| CDC26        | 0.32379335  | 0.05375284 | 2.53804581  |     |
| SOAT1        | 0.32378189  | 0.05375284 | 2.53794545  |     |
| GCM1         | -0.32378694 | 0.05375284 | -2.53798970 |     |
| DOK1         | -0.32375113 | 0.05375854 | -2.53767606 | yes |
| ARL1         | 0.32375763  | 0.05375854 | 2.53773305  |     |
| CEP70        | 0.32376790  | 0.05375854 | 2.53782297  |     |
| TBX6         | -0.32372745 | 0.05376614 | -2.53746876 |     |
| LCMT2        | 0.32373349  | 0.05376614 | 2.53752167  |     |
| LOC100133322 | -0.32364175 | 0.05378763 | -2.53671843 |     |
| GPR45        | -0.32366251 | 0.05378763 | -2.53690021 |     |
| SRFBP1       | 0.32369319  | 0.05378763 | 2.53716878  |     |
| OR1Q1        | -0.32367737 | 0.05378763 | -2.53703030 |     |
| RBM28        | 0.32365271  | 0.05378763 | 2.53681438  |     |
| PSMD10       | 0.32369031  | 0.05378763 | 2.53714360  |     |
| C15orf45     | -0.32362501 | 0.05378763 | -2.53657186 |     |
| APOL5        | -0.32362294 | 0.05378763 | -2.53655376 |     |
| EOMES        | -0.32365844 | 0.05378763 | -2.53686451 |     |
| CAMK1        | -0.32363798 | 0.05378763 | -2.53668541 |     |
| KIAA1841     | 0.32361025  | 0.05379248 | 2.53644263  |     |
| REG1B        | -0.32358354 | 0.05381417 | -2.53620878 |     |
| TIMM22       | 0.32355185  | 0.05384184 | 2.53593140  |     |
| P2RY5        | 0.32352301  | 0.05384532 | 2.53567893  |     |
| PGLYRP2      | -0.32352813 | 0.05384532 | -2.53572371 |     |
| NFIC         | -0.32353687 | 0.05384532 | -2.53580027 |     |
| TROAP        | -0.32351160 | 0.05384864 | -2.53557905 |     |
| F11          | -0.32348833 | 0.05386622 | -2.53537529 |     |
| DUSP26       | -0.32345290 | 0.05389843 | -2.53506517 |     |
| TMSB15A      | -0.32341888 | 0.05392895 | -2.53476742 |     |
| FAM3A        | -0.32339635 | 0.05394567 | -2.53457020 |     |
| CHRND        | -0.32338419 | 0.05394990 | -2.53446376 |     |
| FOXI1        | -0.32337482 | 0.05395077 | -2.53438179 |     |
| OXT          | -0.32332027 | 0.05400605 | -2.53390435 |     |
| CMTM1        | -0.32327134 | 0.05404093 | -2.53347607 |     |
| PCDHGC5      | -0.32326542 | 0.05404093 | -2.53342425 |     |
| RABGGTB      | 0.32328011  | 0.05404093 | 2.53355286  |     |
| PRKCDBP      | -0.32322238 | 0.05406035 | -2.53304763 |     |
| PDXP         | -0.32322368 | 0.05406035 | -2.53305902 |     |
| XYLT1        | -0.32321477 | 0.05406035 | -2.53298100 |     |
| CADPS        | -0.32323550 | 0.05406035 | -2.53316241 |     |
| PRMT5        | 0.32319214  | 0.05407599 | 2.53278302  |     |
| SGCZ         | -0.32314366 | 0.05407599 | -2.53235877 |     |
| C1orf177     | -0.32316953 | 0.05407599 | -2.53258513 |     |

|              |             |            |             |     |
|--------------|-------------|------------|-------------|-----|
| ZCCHC24      | -0.32313776 | 0.05407599 | -2.53230711 |     |
| C1orf104     | -0.32313518 | 0.05407599 | -2.53228455 |     |
| ZNF821       | -0.32314928 | 0.05407599 | -2.53240799 |     |
| ZNF26        | 0.32313279  | 0.05407599 | 2.53226361  |     |
| SHOC2        | 0.32316812  | 0.05407599 | 2.53257279  |     |
| CHRM3        | -0.32311382 | 0.05407807 | -2.53209768 |     |
| CLCN1        | -0.32311924 | 0.05407807 | -2.53214510 |     |
| C6orf167     | 0.32309409  | 0.05408245 | 2.53192503  |     |
| KIAA1712     | 0.32309296  | 0.05408245 | 2.53191516  |     |
| TMEM56       | 0.32306139  | 0.05408369 | 2.53163895  |     |
| CCDC116      | -0.32304027 | 0.05408369 | -2.53145410 |     |
| TSPAN16      | -0.32305232 | 0.05408369 | -2.53155951 |     |
| FLJ41423     | -0.32305519 | 0.05408369 | -2.53158470 |     |
| LRRN3        | -0.32304794 | 0.05408369 | -2.53152125 | yes |
| NARS2        | 0.32307344  | 0.05408369 | 2.53174430  |     |
| NKX2-8       | -0.32300323 | 0.05409913 | -2.53113009 |     |
| AIRE         | -0.32300165 | 0.05409913 | -2.53111624 |     |
| RPL30        | 0.32301452  | 0.05409913 | 2.53122878  |     |
| FBXO38       | 0.32294541  | 0.05415658 | 2.53062415  |     |
| DCST1        | -0.32290493 | 0.05419506 | -2.53027003 |     |
| C8orf38      | 0.32288741  | 0.05419543 | 2.53011683  |     |
| HNRPLL       | 0.32288848  | 0.05419543 | 2.53012617  |     |
| LOC100133410 | -0.32284479 | 0.05422094 | -2.52974397 |     |
| ZNF529       | 0.32285666  | 0.05422094 | 2.52984783  |     |
| CCL22        | -0.32284050 | 0.05422094 | -2.52970643 |     |
| SPDYE7P      | -0.32282182 | 0.05423312 | -2.52954305 |     |
| BXDC5        | 0.32279518  | 0.05425492 | 2.52931000  |     |
| TSNARE1      | -0.32277798 | 0.05425494 | -2.52915953 |     |
| ZP2          | -0.32278505 | 0.05425494 | -2.52922139 |     |
| HSD17B12     | 0.32276449  | 0.05426086 | 2.52904156  |     |
| POP4         | 0.32272667  | 0.05429347 | 2.52871073  |     |
| NKAIN4       | -0.32272033 | 0.05429347 | -2.52865534 |     |
| C2orf56      | 0.32268642  | 0.05432409 | 2.52835872  |     |
| C12orf74     | 0.32266615  | 0.05433821 | 2.52818148  |     |
| NOC3L        | 0.32263270  | 0.05436830 | 2.52788892  |     |
| CST5         | -0.32260141 | 0.05438639 | -2.52761531 |     |
| HECW1        | -0.32259321 | 0.05438639 | -2.52754358 |     |
| IZUMO1       | -0.32258673 | 0.05438639 | -2.52748690 |     |
| DERL2        | 0.32258342  | 0.05438639 | 2.52745796  |     |
| NLRP7        | -0.32253898 | 0.05441942 | -2.52706932 |     |
| HTR3E        | -0.32254538 | 0.05441942 | -2.52712527 |     |
| NUDT21       | 0.32252562  | 0.05442521 | 2.52695250  |     |
| SMC3         | 0.32249840  | 0.05444780 | 2.52671447  |     |
| PRSS33       | -0.32247539 | 0.05445629 | -2.52651329 |     |
| NUDT18       | -0.32247424 | 0.05445629 | -2.52650325 |     |
| ASB11        | -0.32241922 | 0.05451258 | -2.52602214 |     |
| GNB3         | -0.32240299 | 0.05452187 | -2.52588022 |     |
| MLL4         | -0.32238404 | 0.05453446 | -2.52571452 |     |
| COL27A1      | -0.32235091 | 0.05456425 | -2.52542491 |     |
| ZFP161       | 0.32228743  | 0.05463091 | 2.52486988  |     |

|              |             |            |             |     |
|--------------|-------------|------------|-------------|-----|
| GAF2         | -0.32221187 | 0.05466247 | -2.52420940 |     |
| DEFB128      | -0.32223492 | 0.05466247 | -2.52441088 |     |
| METTL14      | 0.32223143  | 0.05466247 | 2.52438039  |     |
| PEX19        | 0.32221362  | 0.05466247 | 2.52422468  |     |
| RFWD2        | 0.32223263  | 0.05466247 | 2.52439081  |     |
| TMTC4        | 0.32221006  | 0.05466247 | 2.52419355  |     |
| VPS36        | 0.32213474  | 0.05474362 | 2.52353518  |     |
| NOL11        | 0.32208484  | 0.05479394 | 2.52309899  |     |
| OBFC1        | 0.32205299  | 0.05482229 | 2.52282061  |     |
| FAM70A       | -0.32202026 | 0.05485173 | -2.52253461 |     |
| SLC31A1      | 0.32198448  | 0.05488491 | 2.52222187  |     |
| MRPS30       | 0.32196688  | 0.05488545 | 2.52206808  |     |
| NXPH3        | -0.32192255 | 0.05488545 | -2.52168070 |     |
| FAM148A      | -0.32189165 | 0.05488545 | -2.52141066 |     |
| GTF2H3       | 0.32193046  | 0.05488545 | 2.52174976  |     |
| RBPJ         | 0.32190599  | 0.05488545 | 2.52153592  |     |
| IL8RA        | -0.32192512 | 0.05488545 | -2.52170315 |     |
| NPR1         | -0.32194014 | 0.05488545 | -2.52183435 |     |
| TRIT1        | 0.32188996  | 0.05488545 | 2.52139591  |     |
| LIN7C        | 0.32189409  | 0.05488545 | 2.52143193  |     |
| LOC645195    | -0.32195980 | 0.05488545 | -2.52200621 |     |
| GJA10        | -0.32191580 | 0.05488545 | -2.52162169 |     |
| PP14571      | -0.32183865 | 0.05489714 | -2.52094746 |     |
| FCHO2        | 0.32185889  | 0.05489714 | 2.52112438  |     |
| GPR135       | -0.32183767 | 0.05489714 | -2.52093897 |     |
| SLC20A1      | 0.32184270  | 0.05489714 | 2.52098290  |     |
| BRSK2        | -0.32186868 | 0.05489714 | -2.52120992 |     |
| OR6N1        | -0.32182573 | 0.05490128 | -2.52083464 |     |
| CCDC126      | 0.32181304  | 0.05490635 | 2.52072372  |     |
| ZNF192       | 0.32176363  | 0.05495619 | 2.52029204  |     |
| ACAP2        | 0.32171953  | 0.05499958 | 2.51990674  |     |
| TMEM210      | -0.32168754 | 0.05501780 | -2.51962724 |     |
| DAB1         | -0.32169300 | 0.05501780 | -2.51967491 |     |
| C9orf45      | 0.32165107  | 0.05505193 | 2.51930855  |     |
| LEPRE1       | -0.32162960 | 0.05506773 | -2.51912102 | yes |
| OR111        | -0.32155976 | 0.05508014 | -2.51851093 |     |
| FLJ43860     | -0.32157706 | 0.05508014 | -2.51866208 |     |
| OR6C75       | -0.32158337 | 0.05508014 | -2.51871714 |     |
| NFIX         | -0.32156389 | 0.05508014 | -2.51854701 |     |
| TEX14        | -0.32158655 | 0.05508014 | -2.51874496 |     |
| ENTPD7       | 0.32159058  | 0.05508014 | 2.51878011  |     |
| SNX22        | -0.32156291 | 0.05508014 | -2.51853843 |     |
| KIAA1279     | 0.32154879  | 0.05508314 | 2.51841510  | yes |
| CDRT15       | -0.32152022 | 0.05510764 | -2.51816552 |     |
| COMMD8       | 0.32149897  | 0.05512321 | 2.51797989  |     |
| TCTE3        | -0.32148436 | 0.05513065 | -2.51785230 |     |
| LOC100133426 | -0.32146706 | 0.05514140 | -2.51770115 |     |
| SIGLEC7      | -0.32142850 | 0.05516773 | -2.51736438 |     |
| OR12D3       | -0.32143108 | 0.05516773 | -2.51738692 |     |
| RSPO3        | -0.32141295 | 0.05517634 | -2.51722854 |     |



|              |             |            |             |     |
|--------------|-------------|------------|-------------|-----|
| OR10A6       | -0.32138906 | 0.05519515 | -2.51701992 |     |
| ADSS         | 0.32130969  | 0.05524023 | 2.51632674  |     |
| COG4         | 0.32131137  | 0.05524023 | 2.51634143  |     |
| SNORD44      | 0.32132002  | 0.05524023 | 2.51641698  |     |
| TMEM106B     | 0.32133181  | 0.05524023 | 2.51651992  |     |
| ZWILCH       | 0.32132201  | 0.05524023 | 2.51643431  |     |
| SLC17A4      | -0.32126916 | 0.05526903 | -2.51597281 |     |
| KIAA0368     | 0.32127184  | 0.05526903 | 2.51599625  |     |
| POLR3F       | 0.32119995  | 0.05527190 | 2.51536846  |     |
| STAG2        | 0.32115884  | 0.05527190 | 2.51500943  |     |
| ATXN7L2      | -0.32115639 | 0.05527190 | -2.51498812 |     |
| ZNF714       | -0.32119247 | 0.05527190 | -2.51530313 |     |
| CITED4       | -0.32116407 | 0.05527190 | -2.51505512 |     |
| OR4D10       | -0.32120362 | 0.05527190 | -2.51540044 |     |
| PAX7         | -0.32118610 | 0.05527190 | -2.51524749 |     |
| PTPRO        | -0.32120831 | 0.05527190 | -2.51544144 |     |
| ATP13A3      | 0.32118600  | 0.05527190 | 2.51524665  |     |
| MAP7D3       | -0.32122253 | 0.05527190 | -2.51556557 |     |
| ARL14        | -0.32117542 | 0.05527190 | -2.51515425 |     |
| PKMYT1       | -0.32119027 | 0.05527190 | -2.51528394 |     |
| ZBTB24       | 0.32125689  | 0.05527190 | 2.51586569  |     |
| C11orf53     | -0.32113809 | 0.05527623 | -2.51482827 |     |
| WNT1         | -0.32113589 | 0.05527623 | -2.51480912 |     |
| SNX13        | 0.32108325  | 0.05527905 | 2.51434943  |     |
| FBXO24       | -0.32107435 | 0.05527905 | -2.51427173 |     |
| NEFH         | -0.32107424 | 0.05527905 | -2.51427080 |     |
| DDX4         | -0.32108334 | 0.05527905 | -2.51435026 |     |
| RAB42P       | -0.32111558 | 0.05527905 | -2.51463178 |     |
| TSSC1        | 0.32107537  | 0.05527905 | 2.51428070  |     |
| U2AF1        | 0.32109376  | 0.05527905 | 2.51444122  |     |
| CLEC1B       | -0.32105891 | 0.05528745 | -2.51413696 |     |
| DNTTIP2      | 0.32102596  | 0.05531742 | 2.51384933  |     |
| PRSSL1       | -0.32101647 | 0.05531868 | -2.51376640 |     |
| IL21         | -0.32094268 | 0.05539874 | -2.51312225 |     |
| LOC100132323 | -0.32092471 | 0.05540000 | -2.51296539 |     |
| STK3         | 0.32093015  | 0.05540000 | 2.51301288  |     |
| PHOSPHO1     | -0.32083615 | 0.05548790 | -2.51219235 |     |
| HSPB2        | -0.32083760 | 0.05548790 | -2.51220498 |     |
| MAPK14       | 0.32081124  | 0.05549520 | 2.51197494  |     |
| C14orf106    | 0.32082107  | 0.05549520 | 2.51206074  |     |
| MGC4294      | -0.32080481 | 0.05549520 | -2.51191879 |     |
| TTF1         | 0.32078431  | 0.05550999 | 2.51173985  |     |
| hCG_2045089  | -0.32075489 | 0.05551494 | -2.51148312 |     |
| CLIP1        | 0.32075988  | 0.05551494 | 2.51152663  | yes |
| HEATR6       | 0.32075929  | 0.05551494 | 2.51152146  |     |
| ITM2B        | 0.32071777  | 0.05555017 | 2.51115907  |     |
| COL9A1       | -0.32070556 | 0.05555477 | -2.51105258 |     |
| RPP40        | 0.32066179  | 0.05557740 | 2.51067055  | yes |
| ADAMTS19     | -0.32066426 | 0.05557740 | -2.51069207 |     |
| N4BP2        | 0.32066782  | 0.05557740 | 2.51072322  |     |

|              |             |            |             |     |
|--------------|-------------|------------|-------------|-----|
| IPO7         | 0.32063810  | 0.05559075 | 2.51046380  |     |
| NCKAP1       | 0.32063403  | 0.05559075 | 2.51042830  |     |
| DNAJB8       | -0.32051722 | 0.05564093 | -2.50940899 |     |
| GABRA6       | -0.32055427 | 0.05564093 | -2.50973227 |     |
| HMGCR        | 0.32051951  | 0.05564093 | 2.50942901  |     |
| IL8          | 0.32053351  | 0.05564093 | 2.50955117  |     |
| GBP7         | -0.32056991 | 0.05564093 | -2.50986880 |     |
| LCNL1        | -0.32054956 | 0.05564093 | -2.50969117 |     |
| SMOX         | -0.32057626 | 0.05564093 | -2.50992419 |     |
| VPS13C       | 0.32053173  | 0.05564093 | 2.50953564  |     |
| EIF4A3       | 0.32052972  | 0.05564093 | 2.50951805  |     |
| PSMD2        | 0.32050208  | 0.05564918 | 2.50927686  |     |
| LOC100130633 | 0.32045785  | 0.05566203 | 2.50889099  |     |
| CLEC3A       | -0.32045159 | 0.05566203 | -2.50883634 |     |
| SLC30A7      | 0.32046041  | 0.05566203 | 2.50891330  |     |
| LCE5A        | -0.32045586 | 0.05566203 | -2.50887362 |     |
| OCLN         | 0.32044946  | 0.05566203 | 2.50881775  |     |
| DLX1         | -0.32042990 | 0.05566535 | -2.50864712 |     |
| PHOX2B       | -0.32043536 | 0.05566535 | -2.50869474 |     |
| FLJ35776     | 0.32035574  | 0.05574627 | 2.50800009  |     |
| SBK2         | -0.32034266 | 0.05575200 | -2.50788597 |     |
| MAL2         | 0.32032050  | 0.05576592 | 2.50769268  | yes |
| CACNA1A      | -0.32031451 | 0.05576592 | -2.50764040 |     |
| FAM178B      | -0.32029558 | 0.05577887 | -2.50747523 |     |
| GPR160       | 0.32026912  | 0.05578034 | 2.50724441  |     |
| C12orf5      | 0.32027853  | 0.05578034 | 2.50732651  |     |
| SEMG1        | -0.32027379 | 0.05578034 | -2.50728519 |     |
| PELI1        | 0.32023900  | 0.05580707 | 2.50698172  |     |
| SAMD4A       | -0.32023036 | 0.05580735 | -2.50690632 |     |
| H2BFWT       | -0.32020755 | 0.05582509 | -2.50670736 |     |
| IARS         | 0.32019826  | 0.05582616 | 2.50662638  |     |
| NEBL         | 0.32016679  | 0.05584116 | 2.50635182  | yes |
| GADD45A      | 0.32016086  | 0.05584116 | 2.50630011  |     |
| GH1          | -0.32017272 | 0.05584116 | -2.50640359 |     |
| MED1         | 0.32015096  | 0.05584300 | 2.50621373  |     |
| ZNF223       | 0.32014205  | 0.05584361 | 2.50613602  |     |
| FGF21        | -0.32013100 | 0.05584686 | -2.50603970 |     |
| PEX12        | 0.32012195  | 0.05584765 | 2.50596075  |     |
| SNORD116-11  | -0.32009051 | 0.05586570 | -2.50568653 |     |
| TMBIM4       | 0.32009156  | 0.05586570 | 2.50569565  |     |
| PDHB         | 0.32007000  | 0.05588063 | 2.50550762  |     |
| SLC6A14      | 0.32005474  | 0.05588908 | 2.50537459  |     |
| EI24         | 0.32003750  | 0.05590000 | 2.50522417  |     |
| RHBDL1       | -0.32002598 | 0.05590383 | -2.50512378 |     |
| SCFD2        | 0.31998622  | 0.05593218 | 2.50477697  |     |
| TRMT61B      | 0.31999183  | 0.05593218 | 2.50482591  |     |
| INO80E       | -0.31993321 | 0.05598728 | -2.50431470 |     |
| SIGLEC1      | -0.31988534 | 0.05602750 | -2.50389731 |     |
| C5orf44      | 0.31988387  | 0.05602750 | 2.50388444  |     |
| ORC2L        | 0.31986902  | 0.05603547 | 2.50375502  |     |

|              |             |            |             |     |
|--------------|-------------|------------|-------------|-----|
| C6orf122     | -0.31985500 | 0.05604243 | -2.50363276 |     |
| NEURL2       | -0.31979786 | 0.05608726 | -2.50313454 |     |
| CSTF2        | 0.31979358  | 0.05608726 | 2.50309717  |     |
| TMEFF2       | -0.31980006 | 0.05608726 | -2.50315367 |     |
| FBLN7        | -0.31974162 | 0.05612040 | -2.50264423 |     |
| RPS6KA6      | 0.31975341  | 0.05612040 | 2.50274702  |     |
| COPS2        | 0.31974677  | 0.05612040 | 2.50268908  |     |
| AGRP         | -0.31971944 | 0.05612182 | -2.50245078 |     |
| IL18         | 0.31969855  | 0.05612182 | 2.50226870  |     |
| MUDENG       | 0.31971299  | 0.05612182 | 2.50239455  | yes |
| PSG4         | -0.31970142 | 0.05612182 | -2.50229372 |     |
| ZMYM6        | 0.31971469  | 0.05612182 | 2.50240943  |     |
| CRLF1        | -0.31964700 | 0.05617526 | -2.50181933 |     |
| ZNF175       | 0.31962652  | 0.05619025 | 2.50164075  |     |
| AKAP10       | 0.31961549  | 0.05619087 | 2.50154458  |     |
| COPB2        | 0.31960927  | 0.05619087 | 2.50149036  |     |
| NVL          | 0.31950485  | 0.05629954 | 2.50058018  |     |
| MED13        | 0.31950735  | 0.05629954 | 2.50060200  |     |
| TUSC1        | -0.31946965 | 0.05633282 | -2.50027342 |     |
| LOC100133419 | -0.31944158 | 0.05635727 | -2.50002874 |     |
| ZSCAN10      | -0.31941936 | 0.05637446 | -2.49983510 |     |
| C11orf1      | 0.31933296  | 0.05647144 | 2.49908213  |     |
| C1orf49      | -0.31931589 | 0.05648226 | -2.49893337 |     |
| ATP2A2       | 0.31927316  | 0.05652501 | 2.49856095  |     |
| COMMD9       | 0.31925758  | 0.05653397 | 2.49842526  |     |
| PCBP4        | -0.31922791 | 0.05656050 | -2.49816668 | yes |
| PLEKHA2      | 0.31921943  | 0.05656063 | 2.49809279  |     |
| RPL31P4      | -0.31919571 | 0.05657974 | -2.49788615 |     |
| CAMSAP1      | 0.31918617  | 0.05658120 | 2.49780302  |     |
| ERAS         | -0.31916813 | 0.05659325 | -2.49764582 |     |
| ACER1        | -0.31911481 | 0.05664929 | -2.49718121 |     |
| UQCRC2       | 0.31903494  | 0.05673849 | 2.49648537  |     |
| EMR1         | -0.31896588 | 0.05679349 | -2.49588376 |     |
| LYZ          | -0.31896580 | 0.05679349 | -2.49588310 |     |
| GNPAT        | 0.31897275  | 0.05679349 | 2.49594365  |     |
| TMEM108      | -0.31895407 | 0.05679770 | -2.49578088 |     |
| NRXN2        | -0.31893192 | 0.05681493 | -2.49558796 |     |
| SLC25A13     | 0.31891447  | 0.05682629 | 2.49543593  |     |
| ELP2         | 0.31889974  | 0.05683425 | 2.49530763  |     |
| GFPT2        | -0.31888125 | 0.05684691 | -2.49514660 |     |
| LILRA5       | -0.31885479 | 0.05685909 | -2.49491613 |     |
| MRPL51       | 0.31885559  | 0.05685909 | 2.49492311  |     |
| HMGN4        | 0.31884540  | 0.05686038 | 2.49483436  |     |
| TRA2A        | 0.31882161  | 0.05687968 | 2.49462713  |     |
| LOC100131170 | -0.31871886 | 0.05690377 | -2.49373225 |     |
| SLC24A4      | -0.31872388 | 0.05690377 | -2.49377591 |     |
| MSI2         | 0.31872546  | 0.05690377 | 2.49378966  |     |
| DDX3X        | 0.31873480  | 0.05690377 | 2.49387104  | yes |
| PRPS1L1      | -0.31876923 | 0.05690377 | -2.49417094 |     |
| LOC440733    | -0.31873598 | 0.05690377 | -2.49388129 |     |

|           |             |            |             |
|-----------|-------------|------------|-------------|
| IL17RB    | -0.31875946 | 0.05690377 | -2.49408585 |
| PSMB8     | 0.31873822  | 0.05690377 | 2.49390085  |
| LOC644717 | -0.31876396 | 0.05690377 | -2.49412497 |
| OR10W1    | -0.31873012 | 0.05690377 | -2.49383024 |
| GSDMC     | 0.31869628  | 0.05692159 | 2.49353557  |
| RTP1      | -0.31862913 | 0.05693742 | -2.49295085 |
| LMOD1     | -0.31865032 | 0.05693742 | -2.49313532 |
| IL9       | -0.31866443 | 0.05693742 | -2.49325818 |
| C14orf181 | -0.31862527 | 0.05693742 | -2.49291716 |
| ZNF219    | -0.31866508 | 0.05693742 | -2.49326388 |
| DYNLT1    | 0.31863408  | 0.05693742 | 2.49299391  |
| TMEM169   | -0.31864947 | 0.05693742 | -2.49312796 |
| SPANXD    | -0.31855421 | 0.05701595 | -2.49229839 |
| OCIAD2    | 0.31851074  | 0.05703909 | 2.49191991  |
| LEMD3     | 0.31851699  | 0.05703909 | 2.49197436  |
| FAM175A   | 0.31851648  | 0.05703909 | 2.49196992  |
| UNC5D     | -0.31848423 | 0.05704642 | -2.49168907 |
| EN2       | -0.31842166 | 0.05704642 | -2.49114432 |
| KANK1     | -0.31842281 | 0.05704642 | -2.49115438 |
| IL17C     | -0.31843387 | 0.05704642 | -2.49125068 |
| SPDYE4    | -0.31849078 | 0.05704642 | -2.49174609 |
| C16orf38  | -0.31846992 | 0.05704642 | -2.49156452 |
| NUP133    | 0.31842405  | 0.05704642 | 2.49116512  |
| SNORA28   | 0.31843374  | 0.05704642 | 2.49124953  |
| VEPH1     | -0.31843214 | 0.05704642 | -2.49123559 |
| COX4I2    | -0.31846791 | 0.05704642 | -2.49154700 |
| TAS1R1    | -0.31834988 | 0.05712597 | -2.49051945 |
| LCE3A     | -0.31833467 | 0.05713462 | -2.49038703 |
| ANKRD29   | -0.31828065 | 0.05718154 | -2.48991674 |
| ZNF114    | -0.31828504 | 0.05718154 | -2.48995497 |
| VSIG4     | -0.31825374 | 0.05720488 | -2.48968256 |
| KHK       | -0.31819257 | 0.05727128 | -2.48915009 |
| GPC6      | -0.31814768 | 0.05731003 | -2.48875939 |
| LOC404266 | -0.31814512 | 0.05731003 | -2.48873711 |
| LOC400446 | 0.31808855  | 0.05733252 | 2.48824477  |
| FLJ45256  | -0.31808294 | 0.05733252 | -2.48819592 |
| MEOX2     | -0.31810685 | 0.05733252 | -2.48840399 |
| HNRNPM    | 0.31809975  | 0.05733252 | 2.48834222  |
| OLAH      | -0.31811808 | 0.05733252 | -2.48850178 |
| MAPK8     | 0.31807739  | 0.05733252 | 2.48814758  |
| OR9G1     | -0.31806542 | 0.05733712 | -2.48804346 |
| AMY2B     | 0.31805648  | 0.05733792 | 2.48796569  |
| TIE1      | -0.31803390 | 0.05734544 | -2.48776916 |
| ZBTB16    | -0.31803791 | 0.05734544 | -2.48780405 |
| SHBG      | -0.31800388 | 0.05737277 | -2.48750791 |
| ATP6V1B1  | -0.31797479 | 0.05739894 | -2.48725473 |
| CCDC27    | -0.31791598 | 0.05746254 | -2.48674303 |
| C1orf86   | -0.31789850 | 0.05747412 | -2.48659088 |
| C12orf34  | -0.31787710 | 0.05749063 | -2.48640472 |
| CLDN7     | 0.31784625  | 0.05751906 | 2.48613625  |

|           |             |            |             |     |
|-----------|-------------|------------|-------------|-----|
| SCARNA22  | -0.31781299 | 0.05755054 | -2.48584691 |     |
| BHLHA9    | -0.31779760 | 0.05755950 | -2.48571297 |     |
| SLC22A25  | -0.31774333 | 0.05761664 | -2.48524084 |     |
| P2RX7     | -0.31773272 | 0.05761664 | -2.48514853 |     |
| MRPL1     | 0.31772744  | 0.05761664 | 2.48510259  |     |
| C4orf3    | 0.31769417  | 0.05763771 | 2.48481318  |     |
| LOC729173 | -0.31769938 | 0.05763771 | -2.48485850 |     |
| SCGB1C1   | -0.31765215 | 0.05764404 | -2.48444763 |     |
| SEN5      | 0.31768044  | 0.05764404 | 2.48469368  |     |
| RPL13P12  | -0.31766092 | 0.05764404 | -2.48452393 |     |
| RIT2      | -0.31765968 | 0.05764404 | -2.48451309 |     |
| MANEA     | 0.31764774  | 0.05764404 | 2.48440922  |     |
| CTTN      | 0.31761983  | 0.05766883 | 2.48416643  |     |
| LRDD      | -0.31759983 | 0.05768363 | -2.48399249 |     |
| ANKRD5    | 0.31757057  | 0.05771014 | 2.48373794  |     |
| OR2B11    | -0.31753428 | 0.05771705 | -2.48342234 | yes |
| KIFC3     | -0.31752895 | 0.05771705 | -2.48337595 |     |
| LIG4      | 0.31752372  | 0.05771705 | 2.48333042  |     |
| TBC1D7    | 0.31752970  | 0.05771705 | 2.48338249  |     |
| RNASEL    | 0.31752731  | 0.05771705 | 2.48336168  |     |
| SOST      | -0.31751518 | 0.05771738 | -2.48325617 |     |
| ASCL2     | -0.31749870 | 0.05772775 | -2.48311287 |     |
| DYNC2LI1  | 0.31747680  | 0.05774498 | 2.48292239  |     |
| LIPM      | -0.31744015 | 0.05778087 | -2.48260365 |     |
| C7orf52   | -0.31742112 | 0.05778402 | -2.48243812 |     |
| SLC14A2   | -0.31742177 | 0.05778402 | -2.48244380 |     |
| PIK3CA    | 0.31738648  | 0.05780867 | 2.48213685  |     |
| ARMC5     | -0.31738510 | 0.05780867 | -2.48212490 |     |
| TWIST1    | -0.31737070 | 0.05781644 | -2.48199963 |     |
| TSC22D1   | 0.31736109  | 0.05781815 | 2.48191602  |     |
| PHIP      | 0.31725124  | 0.05794682 | 2.48096081  |     |
| COL4A2    | -0.31719665 | 0.05796344 | -2.48048614 | yes |
| KCNS1     | -0.31720495 | 0.05796344 | -2.48055835 |     |
| TACSTD2   | 0.31719558  | 0.05796344 | 2.48047681  |     |
| MSH3      | 0.31721797  | 0.05796344 | 2.48067153  |     |
| ARID4B    | 0.31719764  | 0.05796344 | 2.48049475  |     |
| C14orf132 | -0.31718856 | 0.05796344 | -2.48041583 |     |
| UPK1A     | -0.31716346 | 0.05796650 | -2.48019760 |     |
| AK2       | 0.31717576  | 0.05796650 | 2.48030452  |     |
| RASA1     | 0.31716138  | 0.05796650 | 2.48017950  |     |
| ZNF792    | -0.31712802 | 0.05796990 | -2.47988941 |     |
| OTOP1     | -0.31713994 | 0.05796990 | -2.47999304 |     |
| ALDH1A1   | 0.31710976  | 0.05796990 | 2.47973073  |     |
| ATP1A1    | 0.31712009  | 0.05796990 | 2.47982048  |     |
| KCNAB1    | -0.31710920 | 0.05796990 | -2.47972581 |     |
| SLC10A3   | -0.31713823 | 0.05796990 | -2.47997823 |     |
| C20orf79  | -0.31705558 | 0.05801699 | -2.47925963 |     |
| SLC25A3   | 0.31705631  | 0.05801699 | 2.47926600  |     |
| TFB1M     | 0.31700046  | 0.05807648 | 2.47878051  |     |
| FAM160B1  | 0.31696295  | 0.05811365 | 2.47845439  |     |

|              |             |            |             |     |
|--------------|-------------|------------|-------------|-----|
| METT10D      | 0.31695121  | 0.05811809 | 2.47835234  |     |
| BIN1         | -0.31694164 | 0.05811977 | -2.47826920 |     |
| MLANA        | -0.31692410 | 0.05812085 | -2.47811669 |     |
| KIAA0947     | 0.31691930  | 0.05812085 | 2.47807501  |     |
| PYY          | -0.31691608 | 0.05812085 | -2.47804698 |     |
| C7orf38      | 0.31688315  | 0.05813153 | 2.47776072  |     |
| PRR18        | -0.31686089 | 0.05813153 | -2.47756724 |     |
| ACACA        | 0.31685003  | 0.05813153 | 2.47747287  |     |
| IL8RB        | -0.31689483 | 0.05813153 | -2.47786227 |     |
| A2BP1        | -0.31686089 | 0.05813153 | -2.47756726 |     |
| TTC19        | 0.31685771  | 0.05813153 | 2.47753967  |     |
| SRP19        | -0.31685372 | 0.05813153 | -2.47750494 |     |
| SCYL2        | 0.31683648  | 0.05813829 | 2.47735511  |     |
| UMOD         | -0.31680171 | 0.05817201 | -2.47705296 |     |
| USP1         | 0.31673387  | 0.05824783 | 2.47646331  |     |
| GNAQ         | 0.31668818  | 0.05829551 | 2.47606623  |     |
| SLC17A6      | -0.31665239 | 0.05833061 | -2.47575522 |     |
| PDCL         | 0.31663695  | 0.05833979 | 2.47562107  |     |
| AGK          | 0.31661779  | 0.05835372 | 2.47545462  |     |
| LYPLAL1      | 0.31660808  | 0.05835562 | 2.47537019  |     |
| KPNA6        | 0.31659411  | 0.05836293 | 2.47524886  |     |
| RPS6KA2      | -0.31658094 | 0.05836924 | -2.47513439 |     |
| RPS8P7       | -0.31655791 | 0.05838811 | -2.47493431 |     |
| PTPRA        | 0.31654565  | 0.05839327 | 2.47482777  |     |
| LOC100128225 | -0.31649863 | 0.05839683 | -2.47441918 |     |
| EME2         | -0.31650315 | 0.05839683 | -2.47445852 |     |
| KRT27        | -0.31649356 | 0.05839683 | -2.47437519 |     |
| MRGPRG       | -0.31652311 | 0.05839683 | -2.47463192 |     |
| C4orf14      | 0.31651571  | 0.05839683 | 2.47456762  |     |
| CHURC1       | 0.31651815  | 0.05839683 | 2.47458884  |     |
| KPTN         | -0.31644753 | 0.05844505 | -2.47397527 |     |
| PHPT1        | -0.31638681 | 0.05849237 | -2.47344775 |     |
| CNIH4        | 0.31639928  | 0.05849237 | 2.47355604  |     |
| OR8J3        | -0.31638581 | 0.05849237 | -2.47343906 |     |
| C21orf99     | -0.31636645 | 0.05850661 | -2.47327084 |     |
| USP9X        | 0.31633096  | 0.05854144 | 2.47296252  |     |
| FBXW2        | 0.31631269  | 0.05854467 | 2.47280383  |     |
| OR14A16      | -0.31630381 | 0.05854467 | -2.47272675 |     |
| DEFB132      | -0.31631020 | 0.05854467 | -2.47278225 |     |
| IDS          | 0.31628607  | 0.05855063 | 2.47257265  |     |
| WDR82        | 0.31628274  | 0.05855063 | 2.47254370  |     |
| SOX14        | -0.31626716 | 0.05856005 | -2.47240836 |     |
| CLC          | -0.31619957 | 0.05863038 | -2.47182129 |     |
| TMX1         | 0.31619573  | 0.05863038 | 2.47178787  |     |
| UAP1         | 0.31618442  | 0.05863435 | 2.47168969  |     |
| SLC46A3      | 0.31616375  | 0.05865030 | 2.47151018  |     |
| MARK3        | 0.31615514  | 0.05865084 | 2.47143532  |     |
| RCL1         | 0.31614183  | 0.05865738 | 2.47131972  |     |
| MS4A15       | -0.31611892 | 0.05866362 | -2.47112075 |     |
| TDRD7        | 0.31611081  | 0.05866362 | 2.47105035  | yes |

|           |             |            |             |     |
|-----------|-------------|------------|-------------|-----|
| MPL       | -0.31612468 | 0.05866362 | -2.47117083 |     |
| C6orf226  | -0.31610417 | 0.05866362 | -2.47099271 |     |
| SHROOM4   | -0.31607476 | 0.05869077 | -2.47073725 | yes |
| NPAS4     | -0.31603987 | 0.05870815 | -2.47043431 |     |
| LOXL2     | -0.31604777 | 0.05870815 | -2.47050284 |     |
| C6orf153  | 0.31603661  | 0.05870815 | 2.47040597  |     |
| SPATA2L   | -0.31601300 | 0.05872789 | -2.47020092 |     |
| MIB2      | -0.31598249 | 0.05875647 | -2.46993595 |     |
| RCSD1     | -0.31596296 | 0.05877100 | -2.46976640 |     |
| CCDC47    | 0.31593775  | 0.05879280 | 2.46954752  |     |
| TMLHE     | 0.31587650  | 0.05886082 | 2.46901561  |     |
| CIC       | -0.31586659 | 0.05886303 | -2.46892961 |     |
| DNAJB5    | -0.31585730 | 0.05886446 | -2.46884893 |     |
| PHTF1     | 0.31578872  | 0.05888359 | 2.46825349  |     |
| ODF4      | -0.31579743 | 0.05888359 | -2.46832910 |     |
| KCNA4     | -0.31577726 | 0.05888359 | -2.46815398 |     |
| LHFPL3    | -0.31579844 | 0.05888359 | -2.46833793 |     |
| FLJ41327  | -0.31582242 | 0.05888359 | -2.46854613 |     |
| LOC728613 | -0.31578865 | 0.05888359 | -2.46825294 |     |
| ZNF134    | 0.31579083  | 0.05888359 | 2.46827181  |     |
| CGGBP1    | 0.31577698  | 0.05888359 | 2.46815155  |     |
| APOO      | 0.31575693  | 0.05889881 | 2.46797755  |     |
| MACC1     | 0.31573295  | 0.05891910 | 2.46776932  |     |
| ANKRD19   | -0.31570882 | 0.05893958 | -2.46755985 |     |
| WDR72     | 0.31568835  | 0.05895537 | 2.46738212  |     |
| GSTA1     | 0.31567618  | 0.05896050 | 2.46727650  |     |
| KCNIP2    | -0.31564393 | 0.05898094 | -2.46699657 |     |
| ZDHHC4    | 0.31564767  | 0.05898094 | 2.46702903  |     |
| RFWD3     | 0.31558843  | 0.05904174 | 2.46651480  |     |
| EIF3M     | 0.31555677  | 0.05907194 | 2.46623999  |     |
| TNFSF11   | -0.31553919 | 0.05908404 | -2.46608738 |     |
| SERPINA13 | -0.31552637 | 0.05909004 | -2.46597610 |     |
| ZNF738    | 0.31549421  | 0.05911040 | 2.46569698  |     |
| SEC1      | -0.31550081 | 0.05911040 | -2.46575430 |     |
| ASPRV1    | -0.31546140 | 0.05914212 | -2.46541219 |     |
| FOXI2     | -0.31544871 | 0.05914794 | -2.46530209 |     |
| CAMK1D    | 0.31540893  | 0.05917814 | 2.46495690  |     |
| RPL29P15  | -0.31541475 | 0.05917814 | -2.46500733 |     |
| OR2L3     | -0.31539879 | 0.05918069 | -2.46486890 |     |
| IL12B     | -0.31536619 | 0.05921217 | -2.46458598 |     |
| C3orf49   | -0.31531466 | 0.05924222 | -2.46413880 |     |
| CHODL     | -0.31532058 | 0.05924222 | -2.46419016 |     |
| SERPINB13 | 0.31530849  | 0.05924222 | 2.46408527  |     |
| RNF25     | 0.31531023  | 0.05924222 | 2.46410033  |     |
| PLEKHG2   | -0.31530210 | 0.05924222 | -2.46402979 |     |
| SMCR7     | -0.31523463 | 0.05930818 | -2.46344433 |     |
| C1orf14   | -0.31523965 | 0.05930818 | -2.46348791 |     |
| C17orf42  | 0.31521886  | 0.05931800 | 2.46330751  |     |
| MBNL3     | 0.31520320  | 0.05932770 | 2.46317158  |     |
| CRYAA     | -0.31519151 | 0.05933094 | -2.46307021 |     |



|              |             |            |             |     |
|--------------|-------------|------------|-------------|-----|
| FAM109A      | -0.31515826 | 0.05933094 | -2.46278171 |     |
| CALHM1       | -0.31518178 | 0.05933094 | -2.46298575 |     |
| GPD2         | 0.31514528  | 0.05933094 | 2.46266913  |     |
| SCGB1D4      | -0.31514387 | 0.05933094 | -2.46265689 |     |
| MAGEA12      | -0.31514370 | 0.05933094 | -2.46265538 |     |
| TGFA         | 0.31515944  | 0.05933094 | 2.46279198  | yes |
| KIAA1468     | 0.31513550  | 0.05933101 | 2.46258428  | yes |
| GGT5         | -0.31506377 | 0.05940257 | -2.46196192 | yes |
| FLJ10357     | -0.31506999 | 0.05940257 | -2.46201593 |     |
| ALCAM        | 0.31503641  | 0.05941688 | 2.46172459  |     |
| PLA2G1B      | -0.31503903 | 0.05941688 | -2.46174727 |     |
| SATB2        | -0.31500357 | 0.05942704 | -2.46143974 |     |
| GAST         | -0.31499333 | 0.05942704 | -2.46135083 |     |
| ZDHHC8       | -0.31501000 | 0.05942704 | -2.46149547 |     |
| OR6C68       | -0.31498317 | 0.05942704 | -2.46126271 |     |
| OR51B4       | -0.31497977 | 0.05942704 | -2.46123325 |     |
| DAZAP2       | 0.31499348  | 0.05942704 | 2.46135213  | yes |
| PAPD5        | 0.31497160  | 0.05942710 | 2.46116236  |     |
| TXNRD2       | -0.31495255 | 0.05943072 | -2.46099709 |     |
| MAT2B        | 0.31495279  | 0.05943072 | 2.46099916  |     |
| C1orf61      | -0.31493244 | 0.05943187 | -2.46082264 |     |
| KLHDC7B      | -0.31492922 | 0.05943187 | -2.46079476 |     |
| CYB5A        | 0.31491918  | 0.05943187 | 2.46070770  |     |
| ZNF593       | -0.31491958 | 0.05943187 | -2.46071110 |     |
| DEFB137      | -0.31488208 | 0.05946929 | -2.46038587 |     |
| FBXW12       | -0.31486272 | 0.05948381 | -2.46021797 |     |
| TLX1         | -0.31483806 | 0.05949904 | -2.46000403 |     |
| MYL3         | -0.31483470 | 0.05949904 | -2.45997495 |     |
| MATN4        | -0.31478295 | 0.05955543 | -2.45952612 |     |
| FLVCR1       | 0.31472955  | 0.05960352 | 2.45906295  |     |
| LARP7        | 0.31473490  | 0.05960352 | 2.45910939  |     |
| KLKBL4       | -0.31471918 | 0.05960644 | -2.45897303 |     |
| TBC1D26      | -0.31465752 | 0.05966525 | -2.45843830 |     |
| POU5F1P1     | -0.31465980 | 0.05966525 | -2.45845815 |     |
| LOC100129503 | -0.31460830 | 0.05967587 | -2.45801157 |     |
| RNF41        | 0.31462908  | 0.05967587 | 2.45819176  |     |
| ATP5H        | 0.31462119  | 0.05967587 | 2.45812329  |     |
| LARS2        | 0.31459865  | 0.05967587 | 2.45792789  |     |
| G2E3         | 0.31461891  | 0.05967587 | 2.45810354  |     |
| EIF3I        | 0.31459258  | 0.05967587 | 2.45787520  |     |
| MYOM2        | -0.31459371 | 0.05967587 | -2.45788500 |     |
| WNT10B       | -0.31457277 | 0.05969103 | -2.45770343 |     |
| HEY1         | 0.31451141  | 0.05974128 | 2.45717141  |     |
| PPP3R1       | 0.31450688  | 0.05974128 | 2.45713214  |     |
| CXCR5        | -0.31452027 | 0.05974128 | -2.45724828 |     |
| GRAMD3       | 0.31450158  | 0.05974128 | 2.45708623  |     |
| SNORD36A     | 0.31448955  | 0.05974638 | 2.45698189  |     |
| GART         | 0.31446691  | 0.05976393 | 2.45678558  |     |
| TMPO         | 0.31445982  | 0.05976393 | 2.45672412  |     |
| PYROXD1      | 0.31444578  | 0.05977164 | 2.45660241  |     |

|           |             |            |             |     |
|-----------|-------------|------------|-------------|-----|
| GPR137C   | -0.31442278 | 0.05979097 | -2.45640299 |     |
| RNF166    | -0.31438959 | 0.05980657 | -2.45611529 |     |
| HEPHL1    | -0.31440260 | 0.05980657 | -2.45622806 |     |
| MTRF1     | 0.31438648  | 0.05980657 | 2.45608828  |     |
| GPR119    | -0.31436646 | 0.05982204 | -2.45591476 |     |
| NMUR1     | -0.31434961 | 0.05982677 | -2.45576872 |     |
| SLC9A5    | -0.31434665 | 0.05982677 | -2.45574299 |     |
| OLIG2     | -0.31430210 | 0.05984261 | -2.45535686 |     |
| GSPT1     | 0.31431799  | 0.05984261 | 2.45549455  |     |
| IKKBK     | 0.31430296  | 0.05984261 | 2.45536426  |     |
| CEP76     | 0.31431952  | 0.05984261 | 2.45550786  |     |
| TRIM75    | -0.31428863 | 0.05984960 | -2.45524011 |     |
| IFI16     | 0.31425573  | 0.05988181 | 2.45495489  |     |
| ZIC4      | -0.31418216 | 0.05996685 | -2.45431720 |     |
| OR1S2     | -0.31415813 | 0.05997235 | -2.45410890 |     |
| GRM2      | -0.31415494 | 0.05997235 | -2.45408131 |     |
| SNORA4    | 0.31415369  | 0.05997235 | 2.45407047  |     |
| NUP37     | 0.31413492  | 0.05998625 | 2.45390778  |     |
| DLL4      | -0.31407987 | 0.06004733 | -2.45343065 |     |
| PCNP      | 0.31406498  | 0.06005619 | 2.45330162  |     |
| LENEP     | -0.31405251 | 0.06006191 | -2.45319356 |     |
| PCSK6     | -0.31403885 | 0.06006918 | -2.45307521 |     |
| ATP6V0B   | 0.31402634  | 0.06007495 | 2.45296679  |     |
| ZNF689    | -0.31397948 | 0.06012544 | -2.45256070 |     |
| ZNF596    | 0.31396663  | 0.06012632 | 2.45244932  |     |
| F12       | -0.31396266 | 0.06012632 | -2.45241497 |     |
| C10orf108 | -0.31394141 | 0.06014349 | -2.45223077 |     |
| IPO5      | 0.31390909  | 0.06016457 | 2.45195079  |     |
| SNORA31   | -0.31390958 | 0.06016457 | -2.45195501 |     |
| DCX       | -0.31388788 | 0.06018169 | -2.45176702 |     |
| MTPAP     | 0.31384920  | 0.06021923 | 2.45143183  |     |
| SNORA45   | -0.31384295 | 0.06021923 | -2.45137768 |     |
| KCNN2     | -0.31381449 | 0.06024581 | -2.45113112 |     |
| MRPS25    | 0.31380566  | 0.06024681 | 2.45105465  |     |
| BRAP      | 0.31379365  | 0.06025197 | 2.45095052  |     |
| NDUFA6    | 0.31374368  | 0.06030663 | 2.45051767  |     |
| ETS2      | 0.31372709  | 0.06030792 | 2.45037395  |     |
| KRTAP5-2  | -0.31372468 | 0.06030792 | -2.45035304 |     |
| TIMD4     | -0.31371852 | 0.06030792 | -2.45029969 |     |
| SERINC4   | -0.31369579 | 0.06032707 | -2.45010273 |     |
| C4orf33   | 0.31368140  | 0.06033534 | 2.44997810  |     |
| C16orf79  | -0.31364791 | 0.06036854 | -2.44968803 |     |
| SLC6A6    | 0.31361175  | 0.06039784 | 2.44937480  |     |
| ZNF607    | 0.31360938  | 0.06039784 | 2.44935421  | yes |
| NRM       | -0.31355722 | 0.06041517 | -2.44890241 |     |
| SNRNP200  | 0.31356837  | 0.06041517 | 2.44899899  |     |
| GLB1      | 0.31354521  | 0.06041517 | 2.44879836  |     |
| PITX2     | -0.31353978 | 0.06041517 | -2.44875133 |     |
| PCBP3     | -0.31358115 | 0.06041517 | -2.44910971 |     |
| INO80     | 0.31354107  | 0.06041517 | 2.44876251  |     |

|              |             |            |             |     |
|--------------|-------------|------------|-------------|-----|
| TMEM168      | 0.31355302  | 0.06041517 | 2.44886602  |     |
| KPRP         | -0.31350838 | 0.06043518 | -2.44847940 |     |
| SLC10A1      | -0.31351025 | 0.06043518 | -2.44849562 |     |
| RBM34        | 0.31348211  | 0.06045900 | 2.44825187  |     |
| MRPL46       | 0.31347320  | 0.06046014 | 2.44817470  |     |
| TIMM23       | 0.31345120  | 0.06047839 | 2.44798415  |     |
| SEMA6B       | -0.31337265 | 0.06056829 | -2.44730394 | yes |
| CKAP4        | -0.31335836 | 0.06056829 | -2.44718013 |     |
| SUCLA2       | 0.31336184  | 0.06056829 | 2.44721024  |     |
| ASB8         | 0.31329430  | 0.06064164 | 2.44662545  |     |
| PRKAR1A      | 0.31326879  | 0.06066455 | 2.44640450  |     |
| TCHH         | -0.31325170 | 0.06067641 | -2.44625655 |     |
| GALR2        | -0.31323183 | 0.06069192 | -2.44608452 |     |
| PEX11G       | -0.31319291 | 0.06073243 | -2.44574750 |     |
| NCR2         | -0.31317452 | 0.06074601 | -2.44558831 |     |
| KCNG3        | -0.31315292 | 0.06076382 | -2.44540121 |     |
| hCG_1994895  | -0.31312762 | 0.06076540 | -2.44518220 |     |
| PLEKHN1      | -0.31313401 | 0.06076540 | -2.44523757 |     |
| KIAA1804     | -0.31313913 | 0.06076540 | -2.44528187 |     |
| ZNF320       | 0.31309180  | 0.06079879 | 2.44487211  |     |
| PHYHIP1L     | -0.31308612 | 0.06079879 | -2.44482292 |     |
| C22orf40     | -0.31304257 | 0.06084544 | -2.44444590 |     |
| ZNF280A      | -0.31301105 | 0.06086032 | -2.44417306 |     |
| ANKRD33      | -0.31299914 | 0.06086032 | -2.44406993 |     |
| OGG1         | -0.31300294 | 0.06086032 | -2.44410284 |     |
| RPS8P4       | -0.31302070 | 0.06086032 | -2.44425660 |     |
| PHKG1        | -0.31293763 | 0.06093062 | -2.44353747 |     |
| CTNND1       | 0.31291062  | 0.06095408 | 2.44330371  |     |
| S100A10      | 0.31290375  | 0.06095408 | 2.44324420  |     |
| OR8K1        | -0.31288437 | 0.06096902 | -2.44307648 |     |
| ABHD2        | 0.31286306  | 0.06098650 | 2.44289205  |     |
| MAPK10       | 0.31282544  | 0.06102547 | 2.44256642  |     |
| LOC100130264 | -0.31280118 | 0.06103630 | -2.44235645 |     |
| OR2M3        | -0.31280373 | 0.06103630 | -2.44237851 |     |
| C8orf37      | 0.31277237  | 0.06106368 | 2.44210713  |     |
| GTPBP3       | -0.31276306 | 0.06106539 | -2.44202651 |     |
| RPRD1A       | 0.31274845  | 0.06107408 | 2.44190007  |     |
| ALK          | -0.31271522 | 0.06110729 | -2.44161254 |     |
| ELP2P        | -0.31266856 | 0.06115824 | -2.44120873 |     |
| TLR9         | -0.31264695 | 0.06117618 | -2.44102170 |     |
| CPAMD8       | -0.31263666 | 0.06117919 | -2.44093264 |     |
| ALDH1L2      | -0.31262357 | 0.06118588 | -2.44081939 |     |
| CLEC5A       | -0.31261481 | 0.06118688 | -2.44074357 |     |
| FRG1         | 0.31259116  | 0.06120751 | 2.44053896  |     |
| EFHD1        | -0.31255182 | 0.06124886 | -2.44019853 |     |
| RASGRP2      | -0.31253803 | 0.06125650 | -2.44007922 | yes |
| ADORA1       | -0.31251455 | 0.06126324 | -2.43987609 |     |
| MAPKSP1      | 0.31251787  | 0.06126324 | 2.43990480  |     |
| EIF4E2       | 0.31250891  | 0.06126324 | 2.43982727  |     |
| SECISBP2     | 0.31247256  | 0.06130067 | 2.43951279  | yes |

|              |             |            |             |     |
|--------------|-------------|------------|-------------|-----|
| CHAD         | -0.31244769 | 0.06130529 | -2.43929764 |     |
| DKC1         | 0.31245995  | 0.06130529 | 2.43940369  |     |
| NLGN2        | -0.31244506 | 0.06130529 | -2.43927487 |     |
| GCC2         | 0.31240571  | 0.06134672 | 2.43893439  |     |
| C10orf55     | -0.31237850 | 0.06137212 | -2.43869898 |     |
| C5orf32      | 0.31233965  | 0.06141291 | 2.43836296  |     |
| C11orf58     | 0.31232843  | 0.06141549 | 2.43826590  |     |
| ITPRIPL1     | -0.31231371 | 0.06141549 | -2.43813854 |     |
| CHDH         | -0.31231915 | 0.06141549 | -2.43818559 |     |
| A4GNT        | -0.31228441 | 0.06143497 | -2.43788509 |     |
| HPDL         | -0.31228300 | 0.06143497 | -2.43787287 |     |
| GPR124       | -0.31226702 | 0.06143886 | -2.43773464 | yes |
| KIAA1310     | 0.31226408  | 0.06143886 | 2.43770922  |     |
| CSAG1        | -0.31224003 | 0.06144953 | -2.43750122 |     |
| C5orf36      | 0.31224639  | 0.06144953 | 2.43755624  |     |
| CYorf15B     | 0.31221147  | 0.06147677 | 2.43725414  |     |
| SULT2A1      | -0.31216712 | 0.06150706 | -2.43687057 |     |
| PROK1        | -0.31216463 | 0.06150706 | -2.43684898 |     |
| DLK1         | -0.31217250 | 0.06150706 | -2.43691709 |     |
| DENND4A      | 0.31211192  | 0.06154637 | 2.43639314  |     |
| DSC1         | -0.31211100 | 0.06154637 | -2.43638514 |     |
| VBP1         | 0.31211653  | 0.06154637 | 2.43643303  |     |
| NUP160       | 0.31209195  | 0.06156103 | 2.43622047  |     |
| EIF2S3       | 0.31205485  | 0.06159320 | 2.43589956  |     |
| MAF          | -0.31205171 | 0.06159320 | -2.43587245 |     |
| MAGEA3       | 0.31203009  | 0.06161130 | 2.43568542  |     |
| LOC100129899 | -0.31199738 | 0.06164409 | -2.43540255 |     |
| PNMT         | -0.31196666 | 0.06167426 | -2.43513694 |     |
| LOC100129581 | -0.31195686 | 0.06167668 | -2.43505215 |     |
| APEX1        | 0.31190807  | 0.06172026 | 2.43463029  |     |
| TEX101       | -0.31191491 | 0.06172026 | -2.43468944 |     |
| OR5M10       | -0.31189906 | 0.06172164 | -2.43455240 |     |
| OR9K2        | -0.31189059 | 0.06172229 | -2.43447919 |     |
| FBXL3        | 0.31183569  | 0.06178463 | 2.43400445  |     |
| FUCA1        | 0.31182618  | 0.06178667 | 2.43392222  |     |
| STRADB       | -0.31178966 | 0.06182462 | -2.43360645 |     |
| GTPBP4       | 0.31175721  | 0.06183270 | 2.43332594  |     |
| LOC340900    | -0.31173665 | 0.06183270 | -2.43314817 |     |
| ACOX1        | 0.31176762  | 0.06183270 | 2.43341597  |     |
| NMD3         | 0.31173692  | 0.06183270 | 2.43315055  |     |
| PRKRIP1      | -0.31173577 | 0.06183270 | -2.43314060 |     |
| FAHD1        | 0.31176689  | 0.06183270 | 2.43340966  |     |
| P2RX1        | -0.31172195 | 0.06184048 | -2.43302112 |     |
| SRXN1        | 0.31168622  | 0.06186580 | 2.43271221  |     |
| PRL          | -0.31167902 | 0.06186580 | -2.43265002 |     |
| PIGO         | 0.31168689  | 0.06186580 | 2.43271802  |     |
| HNRNP3       | 0.31165406  | 0.06188842 | 2.43243417  |     |
| RNGTT        | 0.31163528  | 0.06190281 | 2.43227188  |     |
| PTGR2        | 0.31161947  | 0.06191326 | 2.43213519  |     |
| LOC388387    | -0.31156202 | 0.06193678 | -2.43163860 |     |

|              |             |            |             |     |
|--------------|-------------|------------|-------------|-----|
| TRNP1        | -0.31156243 | 0.06193678 | -2.43164216 |     |
| FAM29A       | 0.31158254  | 0.06193678 | 2.43181601  |     |
| PTGER1       | -0.31156405 | 0.06193678 | -2.43165614 | yes |
| RYR2         | -0.31158993 | 0.06193678 | -2.43187987 |     |
| NRSN1        | -0.31154037 | 0.06195502 | -2.43145145 |     |
| KIAA1614     | -0.31153202 | 0.06195555 | -2.43137927 |     |
| TSKS         | -0.31151998 | 0.06196099 | -2.43127522 |     |
| RPS4X        | 0.31150682  | 0.06196792 | 2.43116152  |     |
| GUCA1A       | -0.31146176 | 0.06201734 | -2.43077207 | yes |
| UIMC1        | 0.31145201  | 0.06201976 | 2.43068772  |     |
| TMEM151B     | -0.31144304 | 0.06202111 | -2.43061024 |     |
| LOC100132014 | -0.31142996 | 0.06202796 | -2.43049718 |     |
| PHF10        | 0.31141986  | 0.06203083 | 2.43040990  |     |
| OR6K6        | -0.31139718 | 0.06203988 | -2.43021388 |     |
| EIF4A2       | 0.31139917  | 0.06203988 | 2.43023106  |     |
| MYEOV2       | -0.31134164 | 0.06208215 | -2.42973395 |     |
| COX7B2       | -0.31134713 | 0.06208215 | -2.42978137 |     |
| FLJ10213     | 0.31134255  | 0.06208215 | 2.42974182  |     |
| GLMN         | 0.31126693  | 0.06217121 | 2.42908830  |     |
| LOC100129484 | -0.31119366 | 0.06220545 | -2.42845519 |     |
| RGS19        | -0.31120494 | 0.06220545 | -2.42855271 |     |
| MRVI1        | -0.31119503 | 0.06220545 | -2.42846706 |     |
| WWP1         | 0.31121574  | 0.06220545 | 2.42864601  |     |
| ORC5L        | 0.31120370  | 0.06220545 | 2.42854194  |     |
| INHBE        | -0.31121312 | 0.06220545 | -2.42862331 |     |
| RPS13        | 0.31115773  | 0.06224284 | 2.42814477  |     |
| SRrp35       | -0.31114177 | 0.06225355 | -2.42800690 |     |
| RPL30P8      | -0.31112113 | 0.06227053 | -2.42782857 |     |
| GNA13        | 0.31110047  | 0.06228755 | 2.42765001  |     |
| SPATA8       | -0.31105109 | 0.06234296 | -2.42722343 |     |
| OTOG         | -0.31102568 | 0.06235905 | -2.42700388 |     |
| GEN1         | 0.31102320  | 0.06235905 | 2.42698249  |     |
| GFM1         | 0.31096110  | 0.06243154 | 2.42644604  |     |
| PDZD3        | -0.31093807 | 0.06245177 | -2.42624707 |     |
| MAG          | -0.31092267 | 0.06246178 | -2.42611406 |     |
| PFN3         | -0.31089062 | 0.06249410 | -2.42583718 |     |
| DDI1         | -0.31087207 | 0.06249772 | -2.42567696 |     |
| KRTAP1-5     | -0.31087581 | 0.06249772 | -2.42570926 |     |
| SF3B3        | 0.31085453  | 0.06251060 | 2.42552546  |     |
| LOC100128655 | -0.31083220 | 0.06251191 | -2.42533265 |     |
| PRIMA1       | -0.31080604 | 0.06251191 | -2.42510664 |     |
| DSG4         | -0.31080619 | 0.06251191 | -2.42510799 |     |
| GLRA1        | -0.31082750 | 0.06251191 | -2.42529200 |     |
| IL29         | -0.31081859 | 0.06251191 | -2.42521508 |     |
| INSC         | -0.31082430 | 0.06251191 | -2.42526436 |     |
| TRAFD1       | 0.31073908  | 0.06255923 | 2.42452832  |     |
| FAM71C       | -0.31075416 | 0.06255923 | -2.42465857 |     |
| AK2P2        | -0.31075302 | 0.06255923 | -2.42464871 |     |
| GPR101       | -0.31073931 | 0.06255923 | -2.42453034 |     |
| S100PBP      | 0.31071710  | 0.06257808 | 2.42433857  |     |

|             |             |            |             |     |
|-------------|-------------|------------|-------------|-----|
| RPL37P23    | -0.31070472 | 0.06258408 | -2.42423159 |     |
| IGHE        | -0.31069551 | 0.06258582 | -2.42415206 |     |
| DGCR5       | -0.31068526 | 0.06258896 | -2.42406358 |     |
| MSGN1       | -0.31067063 | 0.06259142 | -2.42393723 |     |
| SPRR2C      | -0.31066761 | 0.06259142 | -2.42391115 |     |
| DRG1        | 0.31064965  | 0.06260392 | 2.42375607  |     |
| ZKSCAN1     | 0.31064248  | 0.06260392 | 2.42369412  |     |
| TIMM9       | 0.31058352  | 0.06267243 | 2.42318499  |     |
| UROD        | 0.31053755  | 0.06272355 | 2.42278803  |     |
| SH2D4A      | 0.31049675  | 0.06276775 | 2.42243576  |     |
| ADAMTSL5    | -0.31048179 | 0.06277722 | -2.42230664 |     |
| GPX8        | 0.31044903  | 0.06280295 | 2.42202376  |     |
| NBPF3       | 0.31044685  | 0.06280295 | 2.42200495  |     |
| UNQ1870     | -0.31041467 | 0.06282860 | -2.42172707 |     |
| LSM1        | 0.31040600  | 0.06282860 | 2.42165226  |     |
| ZNF195      | 0.31040408  | 0.06282860 | 2.42163571  |     |
| ASB18       | -0.31038065 | 0.06284950 | -2.42143341 |     |
| TNN         | -0.31036309 | 0.06285554 | -2.42128183 |     |
| hCG_1776018 | -0.31036037 | 0.06285554 | -2.42125828 |     |
| NUDT10      | -0.31031485 | 0.06289555 | -2.42086531 |     |
| BEST2       | -0.31032002 | 0.06289555 | -2.42090994 |     |
| LOC389936   | -0.31028922 | 0.06291943 | -2.42064407 |     |
| RAB3GAP2    | 0.31028034  | 0.06292075 | 2.42056745  |     |
| CDC40       | 0.31022260  | 0.06298745 | 2.42006903  |     |
| WNT9B       | -0.31021504 | 0.06298745 | -2.42000377 |     |
| HTR3D       | -0.31018990 | 0.06300006 | -2.41978682 |     |
| ETV3L       | -0.31019747 | 0.06300006 | -2.41985211 |     |
| DCTN3       | 0.31015023  | 0.06304290 | 2.41944441  |     |
| TSPAN1      | 0.31013445  | 0.06304512 | 2.41930817  |     |
| LOC124220   | -0.31013138 | 0.06304512 | -2.41928168 | yes |
| ORM1        | -0.31012493 | 0.06304512 | -2.41922604 |     |
| UCHL3       | 0.31011211  | 0.06305177 | 2.41911538  |     |
| METTL3      | 0.31009298  | 0.06305632 | 2.41895024  |     |
| SSX1        | -0.31009575 | 0.06305632 | -2.41897417 |     |
| FGF6        | -0.31007807 | 0.06306579 | -2.41882160 |     |
| CNIH        | 0.31000198  | 0.06313656 | 2.41816491  |     |
| SHISA5      | 0.31000980  | 0.06313656 | 2.41823235  |     |
| FXVD6       | -0.31000845 | 0.06313656 | -2.41822074 |     |
| MGC42105    | -0.30994472 | 0.06320306 | -2.41767077 |     |
| C10orf97    | 0.30993698  | 0.06320306 | 2.41760397  |     |
| TMEM155     | -0.30989936 | 0.06321132 | -2.41727937 |     |
| OR7A5       | -0.30990301 | 0.06321132 | -2.41731086 |     |
| CYB5R1      | 0.30990451  | 0.06321132 | 2.41732382  |     |
| ZNF280C     | 0.30990895  | 0.06321132 | 2.41736208  |     |
| IL13RA1     | 0.30987208  | 0.06323755 | 2.41704395  |     |
| BET1        | 0.30983664  | 0.06327480 | 2.41673821  |     |
| CA10        | -0.30979249 | 0.06332388 | -2.41635720 |     |
| PRDM11      | -0.30975197 | 0.06336806 | -2.41600761 |     |
| METAP1      | 0.30970745  | 0.06339637 | 2.41562351  |     |
| PDS5A       | 0.30971954  | 0.06339637 | 2.41572785  |     |

|           |             |            |             |     |
|-----------|-------------|------------|-------------|-----|
| SNORA13   | -0.30971197 | 0.06339637 | -2.41566253 |     |
| RNF113B   | -0.30967940 | 0.06342370 | -2.41538155 |     |
| ITGA7     | -0.30963276 | 0.06347623 | -2.41497920 | yes |
| C13orf16  | -0.30962109 | 0.06348139 | -2.41487852 |     |
| RAB1F     | 0.30959831  | 0.06350160 | 2.41468207  |     |
| PLD4      | -0.30957078 | 0.06352827 | -2.41444456 |     |
| BMP3      | 0.30955632  | 0.06353722 | 2.41431979  |     |
| TRIM42    | -0.30953284 | 0.06354773 | -2.41411729 |     |
| RYR3      | -0.30953313 | 0.06354773 | -2.41411975 |     |
| GDAP2     | 0.30950717  | 0.06357189 | 2.41389588  |     |
| AGXT2     | -0.30949288 | 0.06358062 | -2.41377260 |     |
| MPST      | -0.30939724 | 0.06369609 | -2.41294772 |     |
| MAP1LC3C  | -0.30939213 | 0.06369609 | -2.41290367 |     |
| KIAA2026  | 0.30935170  | 0.06373673 | 2.41255494  |     |
| SRPK1     | 0.30934651  | 0.06373673 | 2.41251026  |     |
| FAM179B   | 0.30931946  | 0.06375215 | 2.41227691  |     |
| C6orf100  | -0.30932467 | 0.06375215 | -2.41232189 |     |
| ACTC1     | -0.30927327 | 0.06380430 | -2.41187863 |     |
| OR51I1    | -0.30922365 | 0.06385770 | -2.41145078 |     |
| MCCC1     | 0.30921047  | 0.06385770 | 2.41133710  |     |
| SET       | 0.30921157  | 0.06385770 | 2.41134654  |     |
| C19orf40  | -0.30920215 | 0.06385834 | -2.41126533 |     |
| DNAJB3    | -0.30918280 | 0.06386330 | -2.41109851 |     |
| SLC8A3    | -0.30918895 | 0.06386330 | -2.41115152 |     |
| LSM5      | 0.30916722  | 0.06387382 | 2.41096419  |     |
| PP2672    | -0.30914593 | 0.06388829 | -2.41078057 |     |
| IL1F10    | -0.30914090 | 0.06388829 | -2.41073727 |     |
| GNMT      | -0.30912747 | 0.06389589 | -2.41062143 |     |
| ZNF837    | -0.30910685 | 0.06391330 | -2.41044365 |     |
| TMEM224   | -0.30908044 | 0.06391721 | -2.41021596 |     |
| LMO7      | 0.30909605  | 0.06391721 | 2.41035052  |     |
| ACR       | -0.30908740 | 0.06391721 | -2.41027598 |     |
| C1orf25   | 0.30903850  | 0.06396368 | 2.40985435  | yes |
| C3orf44   | -0.30900763 | 0.06399507 | -2.40958825 |     |
| SORL1     | 0.30897686  | 0.06402635 | 2.40932298  |     |
| AP1GBP1   | 0.30894734  | 0.06404063 | 2.40906850  |     |
| CPNE8     | 0.30894588  | 0.06404063 | 2.40905586  |     |
| CENPO     | 0.30894287  | 0.06404063 | 2.40902997  |     |
| HMP19     | -0.30891517 | 0.06406774 | -2.40879113 |     |
| NOS1AP    | -0.30890567 | 0.06407001 | -2.40870925 |     |
| TNFRSF13C | -0.30887908 | 0.06407427 | -2.40848007 |     |
| NME2      | -0.30888272 | 0.06407427 | -2.40851147 |     |
| SOLH      | -0.30887904 | 0.06407427 | -2.40847970 |     |
| DUS2L     | 0.30882703  | 0.06413459 | 2.40803139  |     |
| EPHA8     | -0.30878798 | 0.06413795 | -2.40769487 |     |
| RS1       | -0.30878541 | 0.06413795 | -2.40767267 |     |
| GRINL1A   | -0.30879400 | 0.06413795 | -2.40774675 |     |
| TMEM14B   | 0.30879587  | 0.06413795 | 2.40776285  | yes |
| RECQL4    | -0.30880191 | 0.06413795 | -2.40781490 |     |
| RNMT      | 0.30876942  | 0.06414910 | 2.40753483  |     |



|              |             |            |             |     |
|--------------|-------------|------------|-------------|-----|
| DMPK         | -0.30875350 | 0.06414946 | -2.40739765 |     |
| SDC2         | -0.30875708 | 0.06414946 | -2.40742855 |     |
| RBM18        | 0.30873769  | 0.06416036 | 2.40726143  |     |
| KIAA1429     | 0.30872285  | 0.06416766 | 2.40713353  |     |
| AFTPH        | 0.30870888  | 0.06416766 | 2.40701311  | yes |
| CCL16        | -0.30871451 | 0.06416766 | -2.40706162 |     |
| RB1CC1       | 0.30869921  | 0.06417019 | 2.40692978  |     |
| KCNMA1       | -0.30868344 | 0.06418105 | -2.40679384 |     |
| SLC6A12      | -0.30867090 | 0.06418750 | -2.40668576 |     |
| NDUFA10      | 0.30864195  | 0.06421639 | 2.40643625  |     |
| PLEKHG7      | 0.30862399  | 0.06423025 | 2.40628147  |     |
| ERLIN2       | 0.30858435  | 0.06423102 | 2.40593992  |     |
| C15orf40     | 0.30859025  | 0.06423102 | 2.40599079  |     |
| FLJ32756     | -0.30858757 | 0.06423102 | -2.40596770 |     |
| C9orf82      | 0.30859485  | 0.06423102 | 2.40603042  |     |
| CENPT        | -0.30861306 | 0.06423102 | -2.40618731 |     |
| RNF151       | -0.30853576 | 0.06426542 | -2.40552121 |     |
| TMEM64       | 0.30854348  | 0.06426542 | 2.40558771  |     |
| SMARCA5      | 0.30855009  | 0.06426542 | 2.40564468  |     |
| FHOD1        | -0.30848939 | 0.06430748 | -2.40512170 |     |
| C5orf22      | 0.30849260  | 0.06430748 | 2.40514931  |     |
| C12orf11     | 0.30843372  | 0.06437299 | 2.40464204  |     |
| ACBD4        | -0.30842292 | 0.06437710 | -2.40454891 |     |
| RP11-191L9.1 | -0.30838563 | 0.06439821 | -2.40422763 |     |
| hCG_18290    | 0.30839394  | 0.06439821 | 2.40429929  |     |
| STYX         | 0.30838408  | 0.06439821 | 2.40421434  |     |
| TNP2         | -0.30835640 | 0.06442545 | -2.40397582 |     |
| PACS2        | -0.30831126 | 0.06444307 | -2.40358694 |     |
| RGS21        | -0.30830453 | 0.06444307 | -2.40352901 |     |
| KLHL28       | 0.30831929  | 0.06444307 | 2.40365612  |     |
| NUDT11       | -0.30833057 | 0.06444307 | -2.40375331 |     |
| THPO         | -0.30830523 | 0.06444307 | -2.40353499 |     |
| CHUK         | 0.30827946  | 0.06445199 | 2.40331303  |     |
| FAM187B      | -0.30827463 | 0.06445199 | -2.40327143 |     |
| TECPR1       | -0.30828456 | 0.06445199 | -2.40335693 |     |
| ATP1A3       | -0.30824706 | 0.06447910 | -2.40303392 |     |
| RPS2P35      | -0.30821228 | 0.06451609 | -2.40273433 |     |
| SMAD4        | 0.30819937  | 0.06452311 | 2.40262313  |     |
| RCN2         | 0.30818589  | 0.06453092 | 2.40250699  |     |
| ACMSD        | -0.30813069 | 0.06457458 | -2.40203150 |     |
| ZCCHC17      | 0.30813512  | 0.06457458 | 2.40206968  |     |
| HAT1         | 0.30813222  | 0.06457458 | 2.40204473  |     |
| LEMD2        | -0.30812005 | 0.06457757 | -2.40193987 |     |
| ANO2         | -0.30811293 | 0.06457757 | -2.40187857 |     |
| C21orf87     | -0.30808407 | 0.06460651 | -2.40162993 |     |
| C10orf140    | -0.30803804 | 0.06465902 | -2.40123349 |     |
| REM1         | -0.30801089 | 0.06468563 | -2.40099966 |     |
| SLC5A11      | -0.30799370 | 0.06469854 | -2.40085167 |     |
| HOXB13       | -0.30796855 | 0.06472241 | -2.40063510 |     |
| SLC36A4      | 0.30794965  | 0.06472299 | 2.40047234  |     |

|              |             |            |             |     |
|--------------|-------------|------------|-------------|-----|
| ZNF579       | -0.30795568 | 0.06472299 | -2.40052421 |     |
| SDCCAG1      | 0.30794478  | 0.06472299 | 2.40043040  |     |
| CLDN23       | -0.30790844 | 0.06473632 | -2.40011746 |     |
| DOK6         | -0.30787924 | 0.06473632 | -2.39986598 |     |
| FNTB         | 0.30790193  | 0.06473632 | 2.40006133  |     |
| WFDC10B      | -0.30787287 | 0.06473632 | -2.39981113 |     |
| CCNL1        | 0.30789467  | 0.06473632 | 2.39999886  |     |
| ZNF702P      | 0.30788279  | 0.06473632 | 2.39989658  |     |
| TSSK3        | -0.30789865 | 0.06473632 | -2.40003312 |     |
| WNT3A        | -0.30788152 | 0.06473632 | -2.39988558 |     |
| LOC100133207 | -0.30781919 | 0.06476738 | -2.39934890 |     |
| HERC4        | 0.30781923  | 0.06476738 | 2.39934927  |     |
| MAGEA1       | -0.30782442 | 0.06476738 | -2.39939390 |     |
| MTIF2        | 0.30782234  | 0.06476738 | 2.39937606  |     |
| RANBP9       | 0.30780079  | 0.06478200 | 2.39919046  |     |
| TM9SF1       | 0.30774849  | 0.06483257 | 2.39874019  |     |
| YES1         | 0.30775079  | 0.06483257 | 2.39875993  |     |
| ADAM30       | -0.30773993 | 0.06483367 | -2.39866647 |     |
| POU2F2       | -0.30770938 | 0.06486503 | -2.39840345 |     |
| LAMC2        | 0.30767664  | 0.06488873 | 2.39812153  |     |
| MAP3K5       | 0.30768410  | 0.06488873 | 2.39818580  |     |
| TTYH2        | -0.30766859 | 0.06488912 | -2.39805222 |     |
| RIMKLA       | -0.30764227 | 0.06491468 | -2.39782567 |     |
| DBH          | -0.30760904 | 0.06494226 | -2.39753961 |     |
| NARS         | 0.30760673  | 0.06494226 | 2.39751969  |     |
| HNRNPA2B1    | 0.30758871  | 0.06495639 | 2.39736459  |     |
| ALPK3        | -0.30757235 | 0.06496825 | -2.39722371 |     |
| RAB13        | -0.30755157 | 0.06498620 | -2.39704483 |     |
| ROBO4        | -0.30752184 | 0.06501648 | -2.39678898 | yes |
| PPFIA2       | -0.30745033 | 0.06510444 | -2.39617344 |     |
| CCT3         | 0.30741610  | 0.06514100 | 2.39587883  |     |
| KCNQ2        | -0.30735874 | 0.06520954 | -2.39538514 |     |
| PDE6A        | -0.30734574 | 0.06521678 | -2.39527324 |     |
| FLJ11235     | -0.30732250 | 0.06523820 | -2.39507322 |     |
| TRIM60       | -0.30727536 | 0.06527122 | -2.39466751 |     |
| C15orf59     | -0.30728983 | 0.06527122 | -2.39479205 |     |
| KCNK16       | -0.30728105 | 0.06527122 | -2.39471648 |     |
| POM121L9P    | -0.30720676 | 0.06533573 | -2.39407719 |     |
| HOXA5        | -0.30720548 | 0.06533573 | -2.39406622 |     |
| hCG_2015956  | -0.30721648 | 0.06533573 | -2.39416084 |     |
| DPYD         | 0.30717965  | 0.06536077 | 2.39384392  |     |
| CEPT1        | 0.30715454  | 0.06538482 | 2.39362781  |     |
| GRB2         | 0.30714341  | 0.06538950 | 2.39353205  |     |
| LOC347411    | -0.30711320 | 0.06542062 | -2.39327212 |     |
| HERPUD2      | 0.30705283  | 0.06548282 | 2.39275270  |     |
| RNF170       | 0.30705766  | 0.06548282 | 2.39279427  |     |
| PRPF39       | 0.30704385  | 0.06548453 | 2.39267545  |     |
| C8orf85      | -0.30699782 | 0.06553764 | -2.39227943 |     |
| ETV1         | -0.30696610 | 0.06557091 | -2.39200656 |     |
| PGK2         | -0.30693454 | 0.06559322 | -2.39173504 |     |

|              |             |            |             |     |
|--------------|-------------|------------|-------------|-----|
| ZNF85        | -0.30693605 | 0.06559322 | -2.39174797 |     |
| GALNT3       | 0.30692586  | 0.06559453 | 2.39166034  |     |
| TSPYL6       | -0.30690424 | 0.06560380 | -2.39147437 |     |
| ARMC1        | 0.30689996  | 0.06560380 | 2.39143756  |     |
| MIA          | -0.30689596 | 0.06560380 | -2.39140310 |     |
| KIAA1370     | 0.30687890  | 0.06561675 | 2.39125635  |     |
| LOC100131928 | -0.30678508 | 0.06567375 | -2.39044936 |     |
| C12orf66     | 0.30672845  | 0.06567375 | 2.38996224  |     |
| TICAM1       | -0.30673946 | 0.06567375 | -2.39005692 |     |
| PAN3         | 0.30672189  | 0.06567375 | 2.38990587  |     |
| IFNA7        | -0.30677444 | 0.06567375 | -2.39035779 |     |
| KEL          | -0.30674027 | 0.06567375 | -2.39006394 |     |
| ZNF44        | 0.30681150  | 0.06567375 | 2.39067663  |     |
| TRMT12       | 0.30672401  | 0.06567375 | 2.38992402  |     |
| HAMP         | -0.30676517 | 0.06567375 | -2.39027811 |     |
| CNBP         | 0.30681019  | 0.06567375 | 2.39066532  |     |
| AGMAT        | -0.30682233 | 0.06567375 | -2.39076974 |     |
| OR5AC2       | -0.30672602 | 0.06567375 | -2.38994139 |     |
| USP32        | 0.30680646  | 0.06567375 | 2.39063323  |     |
| CLDN9        | -0.30679495 | 0.06567375 | -2.39053422 |     |
| ZBTB22       | -0.30678196 | 0.06567375 | -2.39042252 |     |
| LOC134505    | -0.30668391 | 0.06570050 | -2.38957919 |     |
| TMC5         | 0.30667947  | 0.06570050 | 2.38954101  |     |
| WDR22        | 0.30669446  | 0.06570050 | 2.38966987  |     |
| tcag7.893    | -0.30665688 | 0.06572117 | -2.38934671 |     |
| LOC100129924 | -0.30661080 | 0.06575304 | -2.38895039 |     |
| TRIML1       | -0.30661136 | 0.06575304 | -2.38895525 |     |
| SLC6A11      | -0.30661877 | 0.06575304 | -2.38901894 |     |
| NDUFA2       | 0.30660049  | 0.06575665 | 2.38886175  |     |
| UBAP2        | 0.30658147  | 0.06576163 | 2.38869821  |     |
| LOC645225    | -0.30658778 | 0.06576163 | -2.38875247 |     |
| TFAP2D       | -0.30654905 | 0.06578526 | -2.38841941 |     |
| MAGI1        | -0.30654912 | 0.06578526 | -2.38842000 |     |
| MYBPC2       | -0.30648746 | 0.06586024 | -2.38788979 |     |
| SSTR4        | -0.30646370 | 0.06588258 | -2.38768548 |     |
| AKAP13       | 0.30643769  | 0.06589734 | 2.38746176  |     |
| PIK3C3       | 0.30644507  | 0.06589734 | 2.38752522  |     |
| SPAG7        | -0.30642109 | 0.06590971 | -2.38731907 |     |
| C14orf182    | -0.30640760 | 0.06591176 | -2.38720306 |     |
| MFSD6        | 0.30640420  | 0.06591176 | 2.38717385  |     |
| SNX15        | -0.30636365 | 0.06595753 | -2.38682516 | yes |
| CPA1         | -0.30634658 | 0.06595871 | -2.38667847 |     |
| APAF1        | 0.30634168  | 0.06595871 | 2.38663628  |     |
| MRP63        | 0.30633969  | 0.06595871 | 2.38661917  | yes |
| KLHDC7A      | -0.30629404 | 0.06599190 | -2.38622672 |     |
| LPAR4        | -0.30629527 | 0.06599190 | -2.38623730 | yes |
| VIT          | -0.30629276 | 0.06599190 | -2.38621576 |     |
| ADAD1        | -0.30627224 | 0.06600671 | -2.38603933 |     |
| TMEM14C      | 0.30625904  | 0.06600671 | 2.38592581  |     |
| KRTAP1-1     | -0.30626479 | 0.06600671 | -2.38597529 |     |

|           |             |            |             |     |
|-----------|-------------|------------|-------------|-----|
| ANKRD32   | 0.30624516  | 0.06601533 | 2.38580647  |     |
| KIAA0090  | 0.30622774  | 0.06602889 | 2.38565675  |     |
| NEDD1     | 0.30620262  | 0.06605048 | 2.38544082  |     |
| SYT16     | -0.30619686 | 0.06605048 | -2.38539133 |     |
| MST075    | -0.30616098 | 0.06608982 | -2.38508283 |     |
| MAMDC4    | -0.30608395 | 0.06617589 | -2.38442073 |     |
| ATG16L1   | 0.30608585  | 0.06617589 | 2.38443711  |     |
| CHM       | 0.30604810  | 0.06620448 | 2.38411263  |     |
| LOC729085 | -0.30605122 | 0.06620448 | -2.38413939 |     |
| FRAT1     | -0.30602732 | 0.06622277 | -2.38393402 | yes |
| C8orf40   | 0.30601077  | 0.06623516 | 2.38379175  |     |
| C1orf111  | -0.30599362 | 0.06623763 | -2.38364435 |     |
| KIF5B     | 0.30600127  | 0.06623763 | 2.38371011  |     |
| HIST3H2A  | 0.30596839  | 0.06626216 | 2.38342750  |     |
| CLEC4F    | -0.30595271 | 0.06627334 | -2.38329273 |     |
| FMR1      | 0.30590132  | 0.06633448 | 2.38285108  |     |
| APOA1     | -0.30586958 | 0.06636815 | -2.38257834 |     |
| C16orf70  | 0.30584750  | 0.06638831 | 2.38238860  |     |
| NBAS      | 0.30583714  | 0.06639205 | 2.38229956  |     |
| SYT2      | -0.30581383 | 0.06641393 | -2.38209929 |     |
| GNG7      | -0.30579882 | 0.06642000 | -2.38197033 |     |
| EVI5      | 0.30579413  | 0.06642000 | 2.38193001  |     |
| HOXC10    | -0.30570691 | 0.06653151 | -2.38118058 |     |
| PCDH15    | -0.30566023 | 0.06658624 | -2.38077949 |     |
| PMS2L1    | 0.30563244  | 0.06661448 | 2.38054069  |     |
| EMB       | 0.30561435  | 0.06662909 | 2.38038531  |     |
| POLA2     | 0.30557009  | 0.06668048 | 2.38000508  |     |
| MSTN      | -0.30552891 | 0.06670290 | -2.37965132 |     |
| C10orf118 | 0.30552643  | 0.06670290 | 2.37963004  |     |
| TBX3      | -0.30552342 | 0.06670290 | -2.37960414 |     |
| HS3ST4    | -0.30552344 | 0.06670290 | -2.37960427 |     |
| TMEM194B  | 0.30548801  | 0.06672022 | 2.37929993  |     |
| DIS3L     | 0.30546504  | 0.06672022 | 2.37910265  |     |
| ETV2      | -0.30549480 | 0.06672022 | -2.37935826 |     |
| ZC3H12D   | -0.30547528 | 0.06672022 | -2.37919061 |     |
| KCNK9     | -0.30547351 | 0.06672022 | -2.37917543 |     |
| MADCAM1   | -0.30546677 | 0.06672022 | -2.37911753 |     |
| SRD5A2L2  | -0.30544736 | 0.06673430 | -2.37895074 |     |
| BAK1      | 0.30542517  | 0.06675471 | 2.37876016  |     |
| C17orf63  | -0.30538336 | 0.06680274 | -2.37840100 |     |
| GABRB1    | -0.30533043 | 0.06686645 | -2.37794643 |     |
| ACOT1     | -0.30532050 | 0.06686963 | -2.37786115 |     |
| KLF9      | -0.30530343 | 0.06688287 | -2.37771455 |     |
| CHCHD9    | -0.30529322 | 0.06688645 | -2.37762684 |     |
| NELF      | -0.30527746 | 0.06689394 | -2.37749146 |     |
| AMPH      | -0.30527257 | 0.06689394 | -2.37744947 |     |
| MGC52282  | -0.30523750 | 0.06693255 | -2.37714828 |     |
| ACADSB    | 0.30521216  | 0.06695746 | 2.37693070  |     |
| RHOBTB2   | -0.30518571 | 0.06697314 | -2.37670356 |     |
| TRPM2     | -0.30519095 | 0.06697314 | -2.37674851 |     |

|               |             |            |             |     |
|---------------|-------------|------------|-------------|-----|
| SYNPO2L       | -0.30517376 | 0.06697918 | -2.37660096 |     |
| RAD1          | 0.30512160  | 0.06704195 | 2.37615298  |     |
| RPL7AP53      | -0.30508061 | 0.06707817 | -2.37580107 |     |
| SFXN1         | 0.30508720  | 0.06707817 | 2.37585760  |     |
| RP11-544M22.4 | 0.30502911  | 0.06709682 | 2.37535885  |     |
| LANCL1        | 0.30503009  | 0.06709682 | 2.37536721  |     |
| TRIM33        | 0.30505037  | 0.06709682 | 2.37554139  |     |
| LPAR5         | -0.30503204 | 0.06709682 | -2.37538403 |     |
| SPRR2G        | -0.30503005 | 0.06709682 | -2.37536691 |     |
| OR8B8         | -0.30500762 | 0.06710555 | -2.37517429 |     |
| GRIK1         | -0.30500809 | 0.06710555 | -2.37517840 |     |
| SUCLG1        | 0.30497726  | 0.06713761 | 2.37491365  |     |
| FAM184B       | -0.30493001 | 0.06715084 | -2.37450799 |     |
| OR5D16        | -0.30493197 | 0.06715084 | -2.37452479 |     |
| PLVAP         | -0.30495819 | 0.06715084 | -2.37474994 | yes |
| NROB2         | -0.30492964 | 0.06715084 | -2.37450478 |     |
| HAP1          | -0.30495257 | 0.06715084 | -2.37470171 |     |
| ZSCAN21       | -0.30491637 | 0.06715878 | -2.37439084 |     |
| ZNF468        | 0.30489797  | 0.06717397 | 2.37423291  |     |
| NPSR1         | -0.30482430 | 0.06726730 | -2.37360044 |     |
| ANKLE1        | -0.30475158 | 0.06733845 | -2.37297626 |     |
| CBFA2T3       | -0.30475613 | 0.06733845 | -2.37301530 |     |
| ACCN3         | -0.30475107 | 0.06733845 | -2.37297190 |     |
| SNN           | -0.30471698 | 0.06737590 | -2.37267927 |     |
| ATP7A         | 0.30462906  | 0.06747883 | 2.37192460  |     |
| TAX1BP1       | 0.30462991  | 0.06747883 | 2.37193191  | yes |
| RBPJL         | -0.30461849 | 0.06748298 | -2.37183387 |     |
| ZSCAN4        | -0.30459101 | 0.06750268 | -2.37159803 |     |
| CNOT10        | 0.30457403  | 0.06750268 | 2.37145229  |     |
| OSTN          | -0.30457684 | 0.06750268 | -2.37147647 |     |
| RHOJ          | -0.30458123 | 0.06750268 | -2.37151413 |     |
| PTPN6         | 0.30454997  | 0.06751656 | 2.37124584  |     |
| NPFF          | -0.30454896 | 0.06751656 | -2.37123715 |     |
| CHD8          | 0.30454125  | 0.06751666 | 2.37117102  |     |
| PLEKHA5       | 0.30452995  | 0.06752187 | 2.37107398  |     |
| SPRY4         | -0.30451599 | 0.06753083 | -2.37095422 |     |
| ZFAND1        | 0.30450161  | 0.06754041 | 2.37083078  |     |
| FAM55B        | -0.30442355 | 0.06764037 | -2.37016098 |     |
| STRA8         | -0.30439164 | 0.06767487 | -2.36988711 |     |
| TRPC3         | -0.30431644 | 0.06777093 | -2.36924190 |     |
| ANKRD46       | 0.30426342  | 0.06782828 | 2.36878698  |     |
| ZNF224        | 0.30426087  | 0.06782828 | 2.36876513  |     |
| C3orf63       | 0.30424242  | 0.06784368 | 2.36860683  |     |
| SMPD2         | 0.30419972  | 0.06789363 | 2.36824048  |     |
| SLC16A9       | 0.30415888  | 0.06793006 | 2.36789016  |     |
| C19orf34      | -0.30416258 | 0.06793006 | -2.36792189 |     |
| PTPN14        | -0.30414147 | 0.06794400 | -2.36774082 |     |
| ZNF793        | 0.30410325  | 0.06798762 | 2.36741291  |     |
| NNT           | 0.30408393  | 0.06800420 | 2.36724715  |     |
| DCLRE1B       | 0.30407637  | 0.06800420 | 2.36718230  |     |

|              |             |            |             |     |
|--------------|-------------|------------|-------------|-----|
| HN1          | 0.30405558  | 0.06801374 | 2.36700399  |     |
| MOSC1        | -0.30405443 | 0.06801374 | -2.36699411 |     |
| ABHD7        | -0.30403330 | 0.06802212 | -2.36681290 |     |
| FSTL5        | -0.30403330 | 0.06802212 | -2.36681292 |     |
| CST9L        | -0.30401851 | 0.06803234 | -2.36668605 |     |
| CRYBA1       | -0.30397794 | 0.06807935 | -2.36633809 |     |
| FGFR1        | -0.30391889 | 0.06815281 | -2.36583156 |     |
| HSF5         | -0.30388607 | 0.06817793 | -2.36555007 |     |
| THOC5        | 0.30389252  | 0.06817793 | 2.36560544  |     |
| RUSC2        | -0.30384212 | 0.06822986 | -2.36517319 | yes |
| ARL5B        | 0.30378200  | 0.06828315 | 2.36465764  |     |
| ZNF462       | -0.30379499 | 0.06828315 | -2.36476902 |     |
| TUBB6        | -0.30378891 | 0.06828315 | -2.36471685 | yes |
| PRO1768      | -0.30376776 | 0.06829263 | -2.36453550 |     |
| POLR2F       | 0.30372606  | 0.06833398 | 2.36417789  |     |
| UTX          | 0.30372363  | 0.06833398 | 2.36415710  | yes |
| MBOAT1       | 0.30367645  | 0.06839064 | 2.36375255  |     |
| DUPD1        | -0.30365151 | 0.06839914 | -2.36353872 |     |
| SLC45A1      | -0.30364767 | 0.06839914 | -2.36350580 | yes |
| PRPF38B      | 0.30365813  | 0.06839914 | 2.36359544  |     |
| ICAM4        | -0.30362221 | 0.06841991 | -2.36328749 |     |
| XPNPEP2      | -0.30361795 | 0.06841991 | -2.36325091 |     |
| DRAP1        | -0.30358336 | 0.06845857 | -2.36295437 |     |
| SPO11        | -0.30356812 | 0.06845859 | -2.36282372 |     |
| YARS2        | 0.30356971  | 0.06845859 | 2.36283736  |     |
| CPXM1        | -0.30353776 | 0.06848030 | -2.36256342 |     |
| ROBO3        | -0.30354460 | 0.06848030 | -2.36262203 |     |
| MTMR6        | 0.30352540  | 0.06848712 | 2.36245743  |     |
| ZNF384       | -0.30347350 | 0.06855065 | -2.36201255 |     |
| C22orf26     | -0.30346397 | 0.06855341 | -2.36193083 |     |
| PACRGL       | 0.30342806  | 0.06859405 | 2.36162296  |     |
| C19orf24     | -0.30340550 | 0.06861552 | -2.36142957 |     |
| LOC152667    | -0.30339043 | 0.06862038 | -2.36130041 |     |
| ARL8B        | 0.30338690  | 0.06862038 | 2.36127014  |     |
| OR2AT4       | -0.30334465 | 0.06864931 | -2.36090796 |     |
| RAN          | 0.30334817  | 0.06864931 | 2.36093819  |     |
| HRCT1        | -0.30334395 | 0.06864931 | -2.36090201 |     |
| NPEPPS       | 0.30332491  | 0.06866575 | 2.36073875  |     |
| DGKH         | 0.30329814  | 0.06867634 | 2.36050931  |     |
| LOC649445    | -0.30329090 | 0.06867634 | -2.36044723 |     |
| TMEM38A      | -0.30329031 | 0.06867634 | -2.36044222 | yes |
| PIK3R3       | 0.30328714  | 0.06867634 | 2.36041503  |     |
| ACTR3        | 0.30327353  | 0.06868499 | 2.36029834  |     |
| LOC100133363 | -0.30324365 | 0.06871364 | -2.36004226 |     |
| ASB3         | 0.30323840  | 0.06871364 | 2.35999731  |     |
| LOC442461    | -0.30322711 | 0.06871895 | -2.35990052 |     |
| AMPD3        | 0.30317111  | 0.06878710 | 2.35942055  | yes |
| SOX7         | -0.30316454 | 0.06878710 | -2.35936424 |     |
| CPN1         | -0.30315041 | 0.06879650 | -2.35924320 |     |
| TMEM88       | -0.30313312 | 0.06881045 | -2.35909502 |     |

|             |             |            |             |     |
|-------------|-------------|------------|-------------|-----|
| DMC1        | -0.30310518 | 0.06881996 | -2.35885560 |     |
| BIRC7       | -0.30310374 | 0.06881996 | -2.35884327 |     |
| LOXL3       | -0.30311375 | 0.06881996 | -2.35892902 |     |
| C1QTNF8     | -0.30308751 | 0.06883240 | -2.35870418 |     |
| ATP6V0E1    | 0.30306219  | 0.06885792 | 2.35848719  |     |
| OLFM4       | -0.30305266 | 0.06886073 | -2.35840551 |     |
| ANKRD20A5   | -0.30302399 | 0.06889108 | -2.35815986 |     |
| PRG4        | -0.30299333 | 0.06892432 | -2.35789711 |     |
| APOA4       | -0.30297536 | 0.06893929 | -2.35774310 |     |
| SAMHD1      | 0.30293303  | 0.06898937 | 2.35738043  |     |
| TNKS1BP1    | -0.30291373 | 0.06900626 | -2.35721509 |     |
| MLLT3       | 0.30287729  | 0.06904789 | 2.35690286  |     |
| BMP15       | -0.30285836 | 0.06906427 | -2.35674064 |     |
| HYAL1       | -0.30284467 | 0.06907308 | -2.35662338 |     |
| OR2A5       | -0.30283382 | 0.06907778 | -2.35653047 |     |
| CPSF2       | 0.30277413  | 0.06915303 | 2.35601909  |     |
| TLL1        | -0.30274765 | 0.06918034 | -2.35579219 |     |
| STAC2       | -0.30272889 | 0.06919648 | -2.35563155 |     |
| RPH3A       | -0.30271444 | 0.06920641 | -2.35550776 |     |
| ZHX1        | 0.30267734  | 0.06924910 | 2.35518992  |     |
| OR5AU1      | -0.30266277 | 0.06925921 | -2.35506513 |     |
| CALCR       | -0.30263987 | 0.06928137 | -2.35486899 |     |
| CCDC28A     | 0.30261764  | 0.06929161 | 2.35467855  |     |
| FXD4        | -0.30262193 | 0.06929161 | -2.35471529 |     |
| POLG2       | 0.30257414  | 0.06934121 | 2.35430597  |     |
| RTTN        | 0.30256822  | 0.06934121 | 2.35425524  |     |
| ZNF286A     | 0.30255865  | 0.06934409 | 2.35417329  |     |
| TREH        | -0.30253005 | 0.06937453 | -2.35392834 |     |
| COX6A1      | 0.30250152  | 0.06939444 | 2.35368395  |     |
| TMEM14A     | 0.30249359  | 0.06939444 | 2.35361605  |     |
| ACVR1B      | 0.30249650  | 0.06939444 | 2.35364099  |     |
| ZNRD1       | 0.30247535  | 0.06940989 | 2.35345988  |     |
| UBR1        | 0.30244069  | 0.06944915 | 2.35316301  |     |
| DEFA4       | -0.30237495 | 0.06948123 | -2.35260002 |     |
| NSL1        | 0.30236559  | 0.06948123 | 2.35251993  |     |
| OR6S1       | -0.30238359 | 0.06948123 | -2.35267407 |     |
| PMCH        | -0.30237761 | 0.06948123 | -2.35262287 |     |
| PRKDC       | 0.30236915  | 0.06948123 | 2.35255041  |     |
| PSAPL1      | -0.30239654 | 0.06948123 | -2.35278497 |     |
| LRRCC1      | 0.30236798  | 0.06948123 | 2.35254040  |     |
| C15orf55    | -0.30235759 | 0.06948186 | -2.35245143 |     |
| LY6G6D      | -0.30233889 | 0.06949802 | -2.35229123 |     |
| FLT4        | -0.30232264 | 0.06950104 | -2.35215210 | yes |
| RHBDD2      | 0.30232122  | 0.06950104 | 2.35213998  |     |
| hCG_1993592 | -0.30231413 | 0.06950104 | -2.35207922 |     |
| COL4A1      | -0.30227478 | 0.06954540 | -2.35174232 | yes |
| LYPD6       | -0.30224653 | 0.06954540 | -2.35150041 |     |
| EIF4EBP1    | -0.30226456 | 0.06954540 | -2.35165480 |     |
| GPR111      | -0.30224757 | 0.06954540 | -2.35150934 |     |
| POTEA       | -0.30223065 | 0.06954540 | -2.35136444 |     |



|           |             |            |             |
|-----------|-------------|------------|-------------|
| PDCD5     | -0.30223426 | 0.06954540 | -2.35139539 |
| MRPL33    | 0.30223906  | 0.06954540 | 2.35143647  |
| DNM3      | -0.30219301 | 0.06958905 | -2.35104219 |
| OR13A1    | -0.30216200 | 0.06962309 | -2.35077669 |
| DENND2C   | 0.30214059  | 0.06964322 | 2.35059334  |
| POM121L3P | -0.30205895 | 0.06975084 | -2.34989447 |
| OR6M1     | -0.30203235 | 0.06976918 | -2.34966674 |
| PGAP1     | 0.30203123  | 0.06976918 | 2.34965719  |
| LONP2     | 0.30193882  | 0.06989265 | 2.34886617  |
| PEX7      | 0.30191777  | 0.06991232 | 2.34868593  |
| CARD17    | -0.30188687 | 0.06994632 | -2.34842148 |
| TCP11L2   | 0.30183537  | 0.07000556 | 2.34798069  |
| SNORD45C  | 0.30183113  | 0.07000556 | 2.34794438  |
| KCNC2     | -0.30178303 | 0.07006469 | -2.34753276 |
| UBXN2B    | 0.30165962  | 0.07022285 | 2.34647666  |
| RBM4B     | 0.30166599  | 0.07022285 | 2.34653116  |
| LOC791120 | -0.30164654 | 0.07023095 | -2.34636465 |
| SH2D3C    | -0.30162181 | 0.07025607 | -2.34615307 |
| DDX47     | 0.30160604  | 0.07026808 | 2.34601816  |
| GUCY2C    | -0.30159211 | 0.07027614 | -2.34589895 |
| HMX2      | -0.30158544 | 0.07027614 | -2.34584187 |
| ENTPD5    | 0.30157362  | 0.07028239 | 2.34574075  |
| ZBPB2     | -0.30155890 | 0.07029289 | -2.34561477 |
| PHACTR3   | -0.30153290 | 0.07031990 | -2.34539228 |
| RPS11P5   | 0.30151455  | 0.07033332 | 2.34523532  |
| PCBD2     | 0.30150864  | 0.07033332 | 2.34518476  |
| MAPK7     | -0.30147072 | 0.07037778 | -2.34486030 |
| ZNF805    | 0.30145128  | 0.07039520 | 2.34469402  |
| TRMT5     | 0.30141336  | 0.07043970 | 2.34436956  |
| FLJ42258  | -0.30134094 | 0.07052375 | -2.34374999 |
| LOC651503 | -0.30134762 | 0.07052375 | -2.34380713 |
| LOC440786 | -0.30133332 | 0.07052386 | -2.34368484 |
| OR10G3    | -0.30132152 | 0.07053012 | -2.34358388 |
| ACADL     | -0.30128169 | 0.07057748 | -2.34324319 |
| WRB       | 0.30124374  | 0.07062212 | 2.34291853  |
| SNX16     | 0.30121259  | 0.07065679 | 2.34265209  |
| SYT10     | -0.30120336 | 0.07065927 | -2.34257318 |
| DIRAS1    | -0.30117937 | 0.07067238 | -2.34236794 |
| PRLH      | -0.30118087 | 0.07067238 | -2.34238080 |
| SFTPC     | -0.30117182 | 0.07067241 | -2.34230338 |
| BAAT      | -0.30116332 | 0.07067383 | -2.34223070 |
| SLC1A6    | -0.30114516 | 0.07068944 | -2.34207536 |
| ASGR2     | -0.30112684 | 0.07069697 | -2.34191872 |
| C8A       | -0.30112498 | 0.07069697 | -2.34190275 |
| C1orf213  | -0.30110762 | 0.07070234 | -2.34175433 |
| PRNT      | -0.30110626 | 0.07070234 | -2.34174271 |
| SLC35A3   | 0.30108399  | 0.07072328 | 2.34155220  |
| ZNF101    | 0.30107696  | 0.07072328 | 2.34149205  |
| C9orf41   | 0.30106253  | 0.07072610 | 2.34136872  |
| FAM26D    | -0.30105999 | 0.07072610 | -2.34134695 |

|              |             |            |             |
|--------------|-------------|------------|-------------|
| C20orf11     | 0.30104490  | 0.07073722 | 2.34121792  |
| PAGE3        | -0.30099773 | 0.07079550 | -2.34081451 |
| DUSP9        | -0.30098843 | 0.07079811 | -2.34073501 |
| CAPN7        | 0.30097896  | 0.07080098 | 2.34065400  |
| SMEK2        | 0.30096670  | 0.07080795 | 2.34054917  |
| FBXL17       | 0.30092441  | 0.07085909 | 2.34018754  |
| MARCH6       | 0.30090227  | 0.07086954 | 2.33999824  |
| CA13         | 0.30090419  | 0.07086954 | 2.34001466  |
| PIGK         | 0.30086661  | 0.07089140 | 2.33969333  |
| THSD1P       | 0.30086487  | 0.07089140 | 2.33967843  |
| MYO1D        | 0.30086643  | 0.07089140 | 2.33969179  |
| HOXC8        | -0.30085322 | 0.07089748 | -2.33957883 |
| PPFIA3       | -0.30081097 | 0.07094863 | -2.33921754 |
| ANXA1        | 0.30079411  | 0.07095695 | 2.33907338  |
| SMAD3        | 0.30078278  | 0.07095695 | 2.33897653  |
| WDR55        | 0.30078886  | 0.07095695 | 2.33902852  |
| DCC          | -0.30076888 | 0.07096636 | -2.33885774 |
| CCDC54       | -0.30071182 | 0.07103937 | -2.33836988 |
| SLC38A6      | 0.30070350  | 0.07104057 | 2.33829874  |
| SLC25A37     | -0.30067942 | 0.07105393 | -2.33809288 |
| SLC35B4      | 0.30068485  | 0.07105393 | 2.33813934  |
| KIR3DL3      | -0.30065063 | 0.07107710 | -2.33784676 |
| RPL13AP5     | 0.30064119  | 0.07107710 | 2.33776602  |
| ARNT2        | -0.30064126 | 0.07107710 | -2.33776670 |
| ADRB1        | -0.30061216 | 0.07110883 | -2.33751791 |
| SAMD9        | 0.30056209  | 0.07117164 | 2.33708992  |
| SNORD46      | -0.30054133 | 0.07119122 | -2.33691242 |
| SRPK3        | -0.30052519 | 0.07119994 | -2.33677450 |
| LOC441795    | -0.30052042 | 0.07119994 | -2.33673367 |
| MRPL30       | 0.30048859  | 0.07123585 | 2.33646168  |
| LOC100128653 | -0.30042465 | 0.07124826 | -2.33591517 |
| CHD1         | 0.30043766  | 0.07124826 | 2.33602637  |
| CALHM3       | -0.30046490 | 0.07124826 | -2.33625918 |
| CNN1         | -0.30043748 | 0.07124826 | -2.33602479 |
| PIK3CB       | 0.30043018  | 0.07124826 | 2.33596237  |
| SCP2         | 0.30042947  | 0.07124826 | 2.33595638  |
| UNC119       | -0.30045776 | 0.07124826 | -2.33619809 |
| LRP5L        | -0.30042021 | 0.07124826 | -2.33587722 |
| NEUROG2      | -0.30040255 | 0.07126328 | -2.33572626 |
| OR10Z1       | -0.30039230 | 0.07126735 | -2.33563870 |
| WASF2        | -0.30033897 | 0.07130995 | -2.33518286 |
| DHX15        | 0.30034839  | 0.07130995 | 2.33526342  |
| ACSL3        | 0.30033351  | 0.07130995 | 2.33513620  |
| CD5L         | -0.30035482 | 0.07130995 | -2.33531833 |
| CSNK2A2      | 0.30031343  | 0.07132657 | 2.33496461  |
| CPNE3        | 0.30030729  | 0.07132657 | 2.33491213  |
| RNF113A      | -0.30025165 | 0.07139777 | -2.33443664 |
| KIAA1128     | 0.30023287  | 0.07140976 | 2.33427625  |
| UBE2H        | 0.30022651  | 0.07140976 | 2.33422185  |
| WDR20        | 0.30022108  | 0.07140976 | 2.33417548  |

|              |             |            |             |     |
|--------------|-------------|------------|-------------|-----|
| SH2B2        | -0.30019350 | 0.07143179 | -2.33393976 |     |
| MID1         | 0.30019123  | 0.07143179 | 2.33392038  |     |
| SLC4A4       | 0.30017527  | 0.07144433 | 2.33378399  |     |
| MGC57346     | 0.30013408  | 0.07149423 | 2.33343206  |     |
| CDC42EP1     | -0.30011020 | 0.07149734 | -2.33322804 |     |
| RRM2B        | 0.30011291  | 0.07149734 | 2.33325120  |     |
| RPL13AP3     | -0.30010953 | 0.07149734 | -2.33322233 |     |
| ZNF323       | 0.30008550  | 0.07152186 | 2.33301699  |     |
| KLC3         | -0.30004373 | 0.07155049 | -2.33266016 |     |
| WDR67        | 0.30004790  | 0.07155049 | 2.33269578  |     |
| THRAP3       | 0.30004696  | 0.07155049 | 2.33268770  | yes |
| RAB9A        | 0.30002065  | 0.07157362 | 2.33246296  |     |
| C10orf90     | -0.29998138 | 0.07162075 | -2.33212746 |     |
| MPHOSPH9     | 0.29992590  | 0.07168589 | 2.33165348  |     |
| ADNP2        | 0.29992251  | 0.07168589 | 2.33162453  |     |
| MAP6D1       | -0.29988443 | 0.07173131 | -2.33129924 |     |
| ERP44        | 0.29985891  | 0.07175810 | 2.33108126  |     |
| LOC391764    | -0.29982497 | 0.07179741 | -2.33079133 |     |
| SLU7         | 0.29977324  | 0.07186317 | 2.33034950  |     |
| AIPL1        | -0.29971736 | 0.07193516 | -2.32987224 |     |
| LOC100130370 | -0.29964300 | 0.07202638 | -2.32923715 |     |
| TSR1         | 0.29964114  | 0.07202638 | 2.32922124  |     |
| DDIT4L       | -0.29963074 | 0.07203075 | -2.32913241 |     |
| NEK7         | 0.29956084  | 0.07211263 | 2.32853554  |     |
| CACNB1       | -0.29956286 | 0.07211263 | -2.32855276 |     |
| HES6         | -0.29950831 | 0.07217983 | -2.32808693 |     |
| KLRC1        | 0.29950010  | 0.07218092 | 2.32801689  |     |
| FAM12B       | -0.29946120 | 0.07222391 | -2.32768469 |     |
| FAM50A       | -0.29945636 | 0.07222391 | -2.32764334 |     |
| FOLR2        | -0.29944235 | 0.07223367 | -2.32752370 |     |
| ST6GALNAC3   | -0.29940069 | 0.07228472 | -2.32716800 |     |
| RPL13AP17    | -0.29935619 | 0.07234005 | -2.32678806 |     |
| C17orf80     | 0.29931274  | 0.07239383 | 2.32641714  |     |
| FBXO27       | -0.29929786 | 0.07240493 | -2.32629006 |     |
| RGS8         | -0.29928795 | 0.07240858 | -2.32620547 |     |
| PUSL1        | -0.29922893 | 0.07247224 | -2.32570162 |     |
| FBXO47       | -0.29922627 | 0.07247224 | -2.32567895 |     |
| RBM27        | 0.29920807  | 0.07247224 | 2.32552357  |     |
| FER1L6       | 0.29921227  | 0.07247224 | 2.32555940  |     |
| PGBD5        | -0.29921837 | 0.07247224 | -2.32561149 |     |
| SGPP2        | 0.29919135  | 0.07247493 | 2.32538082  |     |
| SLC46A2      | -0.29919731 | 0.07247493 | -2.32543172 |     |
| LOC100133317 | -0.29915142 | 0.07250300 | -2.32503997 |     |
| LOC100133333 | 0.29915705  | 0.07250300 | 2.32508804  | yes |
| APOL6        | 0.29915021  | 0.07250300 | 2.32502969  |     |
| PSMD7        | 0.29913615  | 0.07251289 | 2.32490961  |     |
| CALCA        | -0.29912224 | 0.07252255 | -2.32479088 |     |
| LOC100130289 | -0.29908332 | 0.07255849 | -2.32445871 |     |
| NEUROG1      | -0.29908748 | 0.07255849 | -2.32449420 |     |
| CD34         | -0.29906606 | 0.07257317 | -2.32431141 |     |

|              |             |            |             |     |
|--------------|-------------|------------|-------------|-----|
| ANKRD34A     | -0.29901777 | 0.07262319 | -2.32389925 |     |
| LOC100133418 | -0.29902017 | 0.07262319 | -2.32391971 |     |
| OR1N2        | -0.29894685 | 0.07271836 | -2.32329398 |     |
| RNF126P1     | -0.29888402 | 0.07279663 | -2.32275773 |     |
| RNF150       | -0.29887979 | 0.07279663 | -2.32272170 |     |
| C9orf46      | 0.29885838  | 0.07281759 | 2.32253899  |     |
| ABHD10       | 0.29881203  | 0.07287604 | 2.32214345  |     |
| DLC1         | -0.29879672 | 0.07288785 | -2.32201279 |     |
| F13B         | -0.29877708 | 0.07290617 | -2.32184522 |     |
| NEXN         | -0.29876851 | 0.07290786 | -2.32177205 |     |
| NDRG2        | -0.29873365 | 0.07293786 | -2.32147463 |     |
| USP29        | -0.29873366 | 0.07293786 | -2.32147475 |     |
| RAB11FIP3    | -0.29869319 | 0.07298525 | -2.32112943 |     |
| FIG4         | 0.29868725  | 0.07298525 | 2.32107875  |     |
| MBTPS2       | 0.29866506  | 0.07299891 | 2.32088937  |     |
| KIR3DX1      | -0.29866328 | 0.07299891 | -2.32087420 |     |
| SGMS2        | 0.29855846  | 0.07314459 | 2.31997992  | yes |
| ANKRD13C     | 0.29855164  | 0.07314459 | 2.31992182  |     |
| ATP6V1D      | 0.29852432  | 0.07317456 | 2.31968869  |     |
| FECH         | 0.29850741  | 0.07318883 | 2.31954444  |     |
| DLG2         | -0.29844721 | 0.07322349 | -2.31903094 |     |
| C6orf223     | -0.29845625 | 0.07322349 | -2.31910807 |     |
| FRG2C        | -0.29845626 | 0.07322349 | -2.31910810 |     |
| PPP6C        | 0.29846885  | 0.07322349 | 2.31921556  |     |
| ZNF226       | 0.29845191  | 0.07322349 | 2.31907100  |     |
| ALX3         | -0.29843309 | 0.07323357 | -2.31891045 |     |
| GPR113       | -0.29839288 | 0.07327311 | -2.31856749 |     |
| RAC1         | 0.29839200  | 0.07327311 | 2.31855998  |     |
| DDX17        | 0.29837460  | 0.07328490 | 2.31841159  |     |
| NPVF         | -0.29836931 | 0.07328490 | -2.31836646 |     |
| DLX3         | -0.29834085 | 0.07329418 | -2.31812375 |     |
| SIX6         | -0.29835477 | 0.07329418 | -2.31824247 |     |
| C1orf27      | 0.29834158  | 0.07329418 | 2.31812996  |     |
| hCG_1645727  | -0.29832460 | 0.07329627 | -2.31798513 |     |
| PCDH24       | -0.29832914 | 0.07329627 | -2.31802382 |     |
| ACRBP        | -0.29830935 | 0.07330808 | -2.31785501 |     |
| SCARNA4      | -0.29830117 | 0.07330920 | -2.31778526 | yes |
| TNFRSF21     | 0.29827117  | 0.07331877 | 2.31752941  |     |
| C11orf54     | 0.29826744  | 0.07331877 | 2.31749764  |     |
| MAP2K4       | 0.29828196  | 0.07331877 | 2.31762143  |     |
| CARTPT       | -0.29826511 | 0.07331877 | -2.31747777 |     |
| KDELR2       | 0.29821907  | 0.07335464 | 2.31708511  |     |
| C1orf55      | 0.29821948  | 0.07335464 | 2.31708860  |     |
| CES7         | -0.29822183 | 0.07335464 | -2.31710861 |     |
| SRPX2        | 0.29820986  | 0.07335515 | 2.31700656  |     |
| RPS25        | 0.29820389  | 0.07335515 | 2.31695559  |     |
| CRYBB3       | -0.29819369 | 0.07335933 | -2.31686868 |     |
| SNORD116-12  | -0.29818070 | 0.07336570 | -2.31675788 |     |
| TNFRSF18     | -0.29817463 | 0.07336570 | -2.31670613 | yes |
| OR52N5       | -0.29816517 | 0.07336878 | -2.31662547 |     |

|              |             |            |             |
|--------------|-------------|------------|-------------|
| ILF2         | 0.29814382  | 0.07337862 | 2.31644337  |
| EMILIN2      | -0.29814894 | 0.07337862 | -2.31648703 |
| LOC201229    | 0.29812101  | 0.07340186 | 2.31624888  |
| DCHS1        | -0.29809314 | 0.07343275 | -2.31601123 |
| POM121L2     | -0.29806489 | 0.07346424 | -2.31577034 |
| TMEM45B      | 0.29802278  | 0.07348306 | 2.31541128  |
| RRS1         | 0.29804070  | 0.07348306 | 2.31556401  |
| HDAC8        | 0.29803034  | 0.07348306 | 2.31547569  |
| SNORA62      | -0.29802799 | 0.07348306 | -2.31545566 |
| PCYT1A       | 0.29796836  | 0.07355415 | 2.31494723  |
| C9orf75      | -0.29794895 | 0.07357230 | -2.31478173 |
| FGR          | -0.29793044 | 0.07358908 | -2.31462397 |
| OR5M8        | -0.29790769 | 0.07361230 | -2.31443002 |
| POLQ         | 0.29788296  | 0.07363284 | 2.31421913  |
| NOSTRIN      | -0.29787244 | 0.07363284 | -2.31412946 |
| CCDC110      | -0.29787189 | 0.07363284 | -2.31412479 |
| ITGB8        | 0.29786205  | 0.07363652 | 2.31404090  |
| GRPEL1       | 0.29783460  | 0.07366688 | 2.31380685  |
| ZNF662       | -0.29782082 | 0.07367653 | -2.31368941 |
| SNORD115-8   | -0.29779529 | 0.07370395 | -2.31347176 |
| M6PRBP1      | 0.29778791  | 0.07370395 | 2.31340883  |
| PRR12        | -0.29777437 | 0.07371324 | -2.31329343 |
| HTR4         | -0.29775863 | 0.07372587 | -2.31315923 |
| ANKRD36B     | 0.29773968  | 0.07373572 | 2.31299769  |
| TADA2L       | 0.29773732  | 0.07373572 | 2.31297761  |
| DUS4L        | 0.29769895  | 0.07377145 | 2.31265052  |
| SCARB1       | -0.29770073 | 0.07377145 | -2.31266569 |
| AGT          | -0.29767115 | 0.07380238 | -2.31241355 |
| RP3-377H14.5 | -0.29766152 | 0.07380576 | -2.31233149 |
| OR10V1       | -0.29762937 | 0.07383207 | -2.31205751 |
| NME3         | -0.29763349 | 0.07383207 | -2.31209259 |
| TCERG1       | 0.29755114  | 0.07393103 | 2.31139075  |
| PPEF1        | -0.29754557 | 0.07393103 | -2.31134323 |
| EIF3A        | 0.29754198  | 0.07393103 | 2.31131264  |
| LOC100133411 | -0.29751979 | 0.07395349 | -2.31112358 |
| OR8D1        | -0.29748683 | 0.07399233 | -2.31084265 |
| GCKR         | -0.29747794 | 0.07399459 | -2.31076692 |
| RRP8         | 0.29746211  | 0.07400168 | 2.31063195  |
| ATXN7        | 0.29745849  | 0.07400168 | 2.31060113  |
| ASXL3        | -0.29745021 | 0.07400303 | -2.31053058 |
| TBC1D29      | -0.29743321 | 0.07401122 | -2.31038569 |
| EFTUD1       | 0.29742667  | 0.07401122 | 2.31032998  |
| TCEAL3       | -0.29742265 | 0.07401122 | -2.31029575 |
| ZMYND8       | 0.29740208  | 0.07403125 | 2.31012043  |
| FAM107A      | -0.29734537 | 0.07403572 | -2.30963717 |
| C3orf48      | -0.29735826 | 0.07403572 | -2.30974700 |
| ANKRD24      | -0.29738080 | 0.07403572 | -2.30993907 |
| HLA-C        | 0.29737832  | 0.07403572 | 2.30991793  |
| RP11-35F15.2 | -0.29734741 | 0.07403572 | -2.30965454 |
| OR56B1       | -0.29736515 | 0.07403572 | -2.30980571 |

|           |             |            |             |     |
|-----------|-------------|------------|-------------|-----|
| KLK14     | -0.29735949 | 0.07403572 | -2.30975748 |     |
| VPRBP     | 0.29734006  | 0.07403572 | 2.30959197  |     |
| PAX6      | -0.29733062 | 0.07403885 | -2.30951154 |     |
| TMEM123   | 0.29731741  | 0.07404772 | 2.30939893  |     |
| DIO3      | -0.29729000 | 0.07407682 | -2.30916544 |     |
| GPR141    | -0.29728350 | 0.07407682 | -2.30911005 |     |
| SYT4      | -0.29726331 | 0.07409631 | -2.30893798 |     |
| C15orf41  | 0.29723896  | 0.07412211 | 2.30873058  |     |
| OR1L6     | -0.29722003 | 0.07413968 | -2.30856928 |     |
| RPL17     | 0.29721159  | 0.07414130 | 2.30849736  |     |
| AICDA     | -0.29719349 | 0.07415762 | -2.30834317 |     |
| CHI3L2    | -0.29717920 | 0.07416805 | -2.30822142 |     |
| C1orf212  | 0.29717030  | 0.07416805 | 2.30814561  |     |
| SIGLEC9   | -0.29716451 | 0.07416805 | -2.30809628 |     |
| BAT2D1    | 0.29714070  | 0.07419308 | 2.30789340  |     |
| PROCA1    | -0.29713099 | 0.07419663 | -2.30781071 |     |
| FLJ32810  | 0.29708424  | 0.07425659 | 2.30741238  |     |
| PPP1R14D  | -0.29706096 | 0.07428081 | -2.30721413 |     |
| LOC642776 | -0.29699796 | 0.07436560 | -2.30667744 |     |
| EFCAB2    | 0.29698948  | 0.07436729 | 2.30660522  |     |
| FLJ11506  | 0.29696658  | 0.07439096 | 2.30641020  | yes |
| NOB1      | 0.29695828  | 0.07439239 | 2.30633947  |     |
| ENTPD8    | -0.29694167 | 0.07440649 | -2.30619798 |     |
| BCL2L12   | -0.29692286 | 0.07442394 | -2.30603776 |     |
| GJB1      | -0.29689060 | 0.07446112 | -2.30576306 |     |
| C8orf73   | -0.29688376 | 0.07446112 | -2.30570480 |     |
| MAGEA11   | -0.29686843 | 0.07447327 | -2.30557423 |     |
| CLCA1     | -0.29684948 | 0.07447763 | -2.30541282 |     |
| EXOSC9    | 0.29684349  | 0.07447763 | 2.30536179  |     |
| ERI1      | 0.29685200  | 0.07447763 | 2.30543429  |     |
| BTBD8     | 0.29683251  | 0.07448315 | 2.30526828  |     |
| ANKRD17   | 0.29678712  | 0.07452998 | 2.30488171  |     |
| P4HTM     | 0.29679168  | 0.07452998 | 2.30492050  |     |
| NBEAL1    | 0.29675903  | 0.07456163 | 2.30464252  | yes |
| ZNF277    | 0.29674462  | 0.07457147 | 2.30451978  |     |
| LTC4S     | -0.29673788 | 0.07457147 | -2.30446235 |     |
| DHX9      | 0.29670616  | 0.07457740 | 2.30419222  |     |
| C12orf70  | -0.29670457 | 0.07457740 | -2.30417871 |     |
| KLHL1     | -0.29670730 | 0.07457740 | -2.30420199 |     |
| CA5A      | -0.29672132 | 0.07457740 | -2.30432134 |     |
| CCDC85B   | -0.29669080 | 0.07458720 | -2.30406147 |     |
| CEP63     | 0.29666351  | 0.07461767 | 2.30382908  |     |
| RANGRF    | -0.29665035 | 0.07462654 | -2.30371705 |     |
| MCM9      | 0.29664067  | 0.07463011 | 2.30363456  |     |
| ETV6      | 0.29662137  | 0.07464836 | 2.30347029  |     |
| OR8K3     | -0.29660518 | 0.07466188 | -2.30333242 |     |
| OR4K1     | -0.29658932 | 0.07467488 | -2.30319740 |     |
| HAX1      | 0.29653540  | 0.07474612 | 2.30273830  |     |
| C9orf68   | 0.29652803  | 0.07474616 | 2.30267548  |     |
| LZTFL1    | 0.29648305  | 0.07480376 | 2.30229255  | yes |

|             |             |            |             |     |
|-------------|-------------|------------|-------------|-----|
| B3GNT1      | -0.29645037 | 0.07484255 | -2.30201437 |     |
| HTATIP2     | 0.29640013  | 0.07490827 | 2.30158667  |     |
| GLO1        | 0.29639060  | 0.07491161 | 2.30150554  |     |
| KIAA1543    | -0.29637549 | 0.07492352 | -2.30137690 |     |
| FLJ35024    | -0.29634335 | 0.07496154 | -2.30110325 |     |
| UNQ5836     | -0.29633368 | 0.07496511 | -2.30102093 |     |
| COL13A1     | -0.29631092 | 0.07497748 | -2.30082724 |     |
| CLDN4       | 0.29631688  | 0.07497748 | 2.30087795  |     |
| FAM90A1     | -0.29629469 | 0.07498745 | -2.30068910 |     |
| KIAA1539    | -0.29628974 | 0.07498745 | -2.30064693 |     |
| LAT2        | -0.29627528 | 0.07499837 | -2.30052384 |     |
| MTMR14      | 0.29625038  | 0.07502531 | 2.30031187  |     |
| CCDC76      | 0.29624270  | 0.07502583 | 2.30024651  |     |
| PRDX1       | 0.29622499  | 0.07504174 | 2.30009583  |     |
| CABP4       | -0.29621323 | 0.07504853 | -2.29999569 |     |
| CHEK2       | 0.29618234  | 0.07508469 | 2.29973274  |     |
| HTRA4       | -0.29612535 | 0.07513840 | -2.29924777 |     |
| OR56A5      | -0.29613231 | 0.07513840 | -2.29930698 |     |
| PLA2G2C     | -0.29613492 | 0.07513840 | -2.29932921 |     |
| SLC9A6      | 0.29608296  | 0.07518099 | 2.29888699  |     |
| IL18RAP     | 0.29608604  | 0.07518099 | 2.29891322  |     |
| POTEC       | -0.29605761 | 0.07518615 | -2.29867121 |     |
| NECAP2      | 0.29605815  | 0.07518615 | 2.29867584  |     |
| HOMER1      | 0.29607180  | 0.07518615 | 2.29879202  |     |
| TTC6        | 0.29602705  | 0.07522186 | 2.29841114  |     |
| OR8D4       | -0.29601479 | 0.07522943 | -2.29830681 |     |
| WDR36       | 0.29594747  | 0.07532171 | 2.29773397  |     |
| EPHB6       | -0.29592366 | 0.07533579 | -2.29753139 |     |
| MYH13       | -0.29592507 | 0.07533579 | -2.29754338 |     |
| MICALL1     | -0.29591420 | 0.07533907 | -2.29745089 |     |
| AFM         | -0.29590217 | 0.07534631 | -2.29734851 |     |
| GFRAL       | -0.29588538 | 0.07534959 | -2.29720568 |     |
| MED14       | 0.29588559  | 0.07534959 | 2.29720746  |     |
| DDX1        | 0.29586282  | 0.07537305 | 2.29701366  |     |
| TREM1       | -0.29584185 | 0.07539406 | -2.29683527 |     |
| SNORD116-25 | -0.29578428 | 0.07545047 | -2.29634546 | yes |
| OR4N2       | -0.29578326 | 0.07545047 | -2.29633676 |     |
| MAGOHB      | 0.29578436  | 0.07545047 | 2.29634617  |     |
| TSP50       | -0.29577400 | 0.07545345 | -2.29625800 |     |
| HS3ST6      | -0.29575370 | 0.07547345 | -2.29608532 |     |
| COMMD4      | -0.29571032 | 0.07552904 | -2.29571624 |     |
| ZNF512B     | -0.29568085 | 0.07556320 | -2.29546552 |     |
| NCOA5       | 0.29567288  | 0.07556421 | 2.29539771  |     |
| CFP         | -0.29564259 | 0.07559964 | -2.29514005 |     |
| ADAMTS5     | -0.29562442 | 0.07561417 | -2.29498548 |     |
| MLH3        | 0.29561854  | 0.07561417 | 2.29493547  |     |
| RASGRP4     | -0.29560723 | 0.07562033 | -2.29483925 |     |
| ZNF610      | 0.29558185  | 0.07562965 | 2.29462333  |     |
| TMEM17      | 0.29557924  | 0.07562965 | 2.29460120  |     |
| C21orf70    | -0.29558973 | 0.07562965 | -2.29469041 |     |



|              |             |            |             |     |
|--------------|-------------|------------|-------------|-----|
| IL12RB1      | -0.29549489 | 0.07572603 | -2.29388370 |     |
| RMND1        | 0.29550293  | 0.07572603 | 2.29395206  |     |
| CXCL12       | -0.29549904 | 0.07572603 | -2.29391895 |     |
| MSH6         | 0.29546224  | 0.07576519 | 2.29360596  |     |
| DACH2        | -0.29545280 | 0.07576847 | -2.29352569 |     |
| AP1G1        | 0.29541456  | 0.07581629 | 2.29320047  |     |
| ATL3         | 0.29539810  | 0.07583044 | 2.29306048  |     |
| C1orf191     | -0.29538410 | 0.07584079 | -2.29294139 |     |
| MARCH3       | 0.29537571  | 0.07584245 | 2.29287008  |     |
| ZBTB33       | 0.29533560  | 0.07584334 | 2.29252899  |     |
| LOC100131112 | -0.29535329 | 0.07584334 | -2.29267937 |     |
| SIRPB1       | -0.29533130 | 0.07584334 | -2.29249236 |     |
| IFNE         | 0.29533658  | 0.07584334 | 2.29253729  |     |
| PRG2-2       | -0.29534534 | 0.07584334 | -2.29261177 |     |
| ARL6         | 0.29535234  | 0.07584334 | 2.29267134  |     |
| CPA5         | -0.29527934 | 0.07591242 | -2.29205056 |     |
| LILRB5       | -0.29526233 | 0.07591614 | -2.29190590 |     |
| TMEM144      | 0.29526526  | 0.07591614 | 2.29193075  |     |
| FLJ43950     | -0.29520023 | 0.07600100 | -2.29137777 |     |
| KIF18B       | -0.29518468 | 0.07601377 | -2.29124562 |     |
| C6orf72      | 0.29514935  | 0.07601428 | 2.29094520  |     |
| OLFM3        | -0.29513326 | 0.07601428 | -2.29080836 |     |
| C11orf86     | -0.29513921 | 0.07601428 | -2.29085894 |     |
| HELLS        | 0.29514140  | 0.07601428 | 2.29087760  |     |
| OAT          | 0.29514318  | 0.07601428 | 2.29089276  |     |
| RRP15        | 0.29514805  | 0.07601428 | 2.29093409  |     |
| CBR4         | 0.29517555  | 0.07601428 | 2.29116799  |     |
| SEC23IP      | 0.29510082  | 0.07604755 | 2.29053258  | yes |
| FBXO9        | 0.29509720  | 0.07604755 | 2.29050174  |     |
| GRHL2        | 0.29508614  | 0.07605338 | 2.29040772  |     |
| RIPPLY2      | -0.29506312 | 0.07607776 | -2.29021199 |     |
| RNF44        | -0.29500826 | 0.07615150 | -2.28974566 |     |
| PAICS        | 0.29500050  | 0.07615223 | 2.28967969  |     |
| AKAP11       | 0.29497940  | 0.07615384 | 2.28950026  |     |
| ZFP62        | 0.29499137  | 0.07615384 | 2.28960207  |     |
| RSHL1        | -0.29497759 | 0.07615384 | -2.28948492 |     |
| TEAD4        | -0.29496176 | 0.07616709 | -2.28935031 |     |
| TDRD9        | -0.29494519 | 0.07618072 | -2.28920949 |     |
| SNRPN        | -0.29493840 | 0.07618072 | -2.28915172 |     |
| PIWIL4       | -0.29491305 | 0.07620476 | -2.28893622 |     |
| NR2C2        | 0.29490833  | 0.07620476 | 2.28889614  |     |
| CLDND1       | 0.29489739  | 0.07621043 | 2.28880315  |     |
| LOC100128977 | -0.29484741 | 0.07626540 | -2.28837829 |     |
| GSG2         | -0.29485133 | 0.07626540 | -2.28841158 |     |
| TRIM10       | -0.29483909 | 0.07626701 | -2.28830754 |     |
| PSMF1        | 0.29482964  | 0.07627037 | 2.28822725  |     |
| FAM186A      | -0.29480079 | 0.07628680 | -2.28798198 |     |
| FLJ40125     | -0.29479757 | 0.07628680 | -2.28795462 |     |
| SLC25A12     | 0.29479722  | 0.07628680 | 2.28795164  |     |
| C7orf13      | 0.29478286  | 0.07628847 | 2.28782962  |     |

|          |             |            |             |     |
|----------|-------------|------------|-------------|-----|
| TCEANC   | 0.29478159  | 0.07628847 | 2.28781880  |     |
| ATP5D    | -0.29472454 | 0.07630928 | -2.28733387 |     |
| TRMT6    | 0.29473005  | 0.07630928 | 2.28738072  |     |
| PRKAA1   | 0.29473008  | 0.07630928 | 2.28738098  |     |
| KLHL7    | 0.29473607  | 0.07630928 | 2.28743187  |     |
| RASGRF1  | -0.29473237 | 0.07630928 | -2.28740043 |     |
| PLCH2    | -0.29473006 | 0.07630928 | -2.28738079 |     |
| RBBP4    | 0.29471548  | 0.07631205 | 2.28725687  |     |
| KLF1     | -0.29468635 | 0.07634144 | -2.28700929 |     |
| CEP290   | 0.29468202  | 0.07634144 | 2.28697249  |     |
| EIF2AK1  | 0.29463655  | 0.07640079 | 2.28658611  |     |
| RHOXF1   | -0.29460287 | 0.07644186 | -2.28629985 |     |
| ZNF469   | -0.29455554 | 0.07650417 | -2.28589769 |     |
| FAM169A  | 0.29453920  | 0.07651829 | 2.28575879  |     |
| OR8G5    | -0.29452751 | 0.07652516 | -2.28565949 |     |
| ZNF653   | -0.29448480 | 0.07657278 | -2.28529653 |     |
| PLD6     | -0.29448239 | 0.07657278 | -2.28527605 |     |
| CTNS     | 0.29439923  | 0.07662310 | 2.28456943  |     |
| FAM53A   | -0.29442940 | 0.07662310 | -2.28482581 |     |
| FLJ46481 | -0.29442691 | 0.07662310 | -2.28480462 |     |
| NAP1L1   | 0.29440446  | 0.07662310 | 2.28461388  |     |
| P2RY4    | -0.29441883 | 0.07662310 | -2.28473599 |     |
| YPEL3    | -0.29441972 | 0.07662310 | -2.28474355 |     |
| TJP2     | 0.29439957  | 0.07662310 | 2.28457234  |     |
| AP3M1    | 0.29437910  | 0.07664314 | 2.28439842  |     |
| PLCG1    | -0.29437156 | 0.07664358 | -2.28433434 |     |
| ASB12    | -0.29436317 | 0.07664527 | -2.28426310 |     |
| TEX28    | -0.29433418 | 0.07664527 | -2.28401675 |     |
| OR1L4    | -0.29434165 | 0.07664527 | -2.28408021 |     |
| PTTG3    | -0.29433809 | 0.07664527 | -2.28405000 |     |
| MYF6     | -0.29435168 | 0.07664527 | -2.28416546 |     |
| MYO3B    | -0.29426449 | 0.07674258 | -2.28342472 |     |
| CCNH     | 0.29425438  | 0.07674703 | 2.28333882  |     |
| SOCS6    | 0.29423539  | 0.07676533 | 2.28317750  |     |
| NOXA1    | -0.29420743 | 0.07679764 | -2.28293997 |     |
| REM2     | -0.29412529 | 0.07684907 | -2.28224222 |     |
| ATOH7    | -0.29414867 | 0.07684907 | -2.28244084 |     |
| AHDC1    | -0.29412000 | 0.07684907 | -2.28219730 |     |
| GNRH1    | -0.29413346 | 0.07684907 | -2.28231160 |     |
| INCENP   | -0.29411645 | 0.07684907 | -2.28216718 |     |
| MDM4     | 0.29411705  | 0.07684907 | 2.28217222  |     |
| C20orf46 | -0.29415732 | 0.07684907 | -2.28251432 |     |
| CACNA1I  | -0.29415776 | 0.07684907 | -2.28251805 |     |
| A1BG     | -0.29405572 | 0.07685622 | -2.28165133 | yes |
| FGF2     | -0.29405392 | 0.07685622 | -2.28163599 |     |
| CCNDBP1  | 0.29406627  | 0.07685622 | 2.28174094  |     |
| NELL1    | -0.29405932 | 0.07685622 | -2.28168190 |     |
| SCOC     | 0.29406472  | 0.07685622 | 2.28172773  |     |
| OBFC2A   | 0.29406510  | 0.07685622 | 2.28173096  |     |
| RIN3     | -0.29408953 | 0.07685622 | -2.28193845 |     |

|          |             |            |             |     |
|----------|-------------|------------|-------------|-----|
| CDC14B   | 0.29405815  | 0.07685622 | 2.28167194  |     |
| C3orf37  | 0.29404437  | 0.07685981 | 2.28155495  |     |
| ZNF768   | -0.29403533 | 0.07686261 | -2.28147817 |     |
| SMARCAD1 | 0.29402229  | 0.07687168 | 2.28136734  |     |
| RNF14    | 0.29397495  | 0.07693429 | 2.28096528  |     |
| RRAGC    | 0.29395079  | 0.07696073 | 2.28076009  |     |
| FLJ40448 | -0.29393956 | 0.07696695 | -2.28066478 |     |
| GLIS1    | -0.29391390 | 0.07699575 | -2.28044679 |     |
| OR10R2   | -0.29390573 | 0.07699721 | -2.28037742 |     |
| ACTR10   | 0.29389575  | 0.07700149 | 2.28029271  |     |
| XRCC4    | 0.29386214  | 0.07703141 | 2.28000725  |     |
| SCYE1    | 0.29386459  | 0.07703141 | 2.28002809  |     |
| POU3F4   | -0.29385465 | 0.07703181 | -2.27994367 |     |
| CALB2    | -0.29383804 | 0.07704648 | -2.27980257 |     |
| OR5B17   | -0.29377276 | 0.07713727 | -2.27924828 |     |
| SERPINA4 | -0.29376539 | 0.07713749 | -2.27918567 |     |
| C20orf7  | 0.29375554  | 0.07714158 | 2.27910207  |     |
| MYO1A    | -0.29372892 | 0.07717192 | -2.27887606 |     |
| NPPA     | -0.29370239 | 0.07720215 | -2.27865076 |     |
| EMILIN1  | -0.29368935 | 0.07721125 | -2.27854000 |     |
| GPR78    | -0.29366198 | 0.07724279 | -2.27830768 |     |
| STAM     | 0.29364185  | 0.07726130 | 2.27813673  |     |
| BXDC1    | 0.29363571  | 0.07726130 | 2.27808461  |     |
| SLC16A7  | 0.29358339  | 0.07733198 | 2.27764039  |     |
| FARSB    | 0.29355042  | 0.07736101 | 2.27736052  |     |
| A1CF     | -0.29355465 | 0.07736101 | -2.27739638 |     |
| TIAM2    | -0.29353186 | 0.07737879 | -2.27720296 |     |
| ZNF737   | 0.29352073  | 0.07738492 | 2.27710846  |     |
| BPIL1    | -0.29349944 | 0.07740698 | -2.27692774 |     |
| SLC22A11 | -0.29344754 | 0.07747711 | -2.27648715 |     |
| PRKRA    | 0.29343532  | 0.07748496 | 2.27638339  |     |
| WDR48    | 0.29342504  | 0.07748975 | 2.27629617  |     |
| C9orf97  | 0.29340133  | 0.07751565 | 2.27609486  |     |
| PGR      | -0.29336032 | 0.07754914 | -2.27574675 |     |
| SETD4    | 0.29336707  | 0.07754914 | 2.27580407  |     |
| ZNHIT6   | 0.29335835  | 0.07754914 | 2.27573004  |     |
| MIPOL1   | 0.29326367  | 0.07767529 | 2.27492647  |     |
| PF4V1    | -0.29326677 | 0.07767529 | -2.27495278 |     |
| KCNV1    | -0.29325450 | 0.07767836 | -2.27484862 |     |
| TPH2     | -0.29323957 | 0.07767913 | -2.27472193 |     |
| FAM159A  | -0.29324070 | 0.07767913 | -2.27473151 |     |
| WDR62    | -0.29322439 | 0.07768030 | -2.27459313 |     |
| SPHK1    | -0.29322966 | 0.07768030 | -2.27463784 | yes |
| UTS2R    | -0.29317349 | 0.07774905 | -2.27416111 |     |
| PAPD4    | 0.29311921  | 0.07776315 | 2.27370050  |     |
| IFIT5    | 0.29311267  | 0.07776315 | 2.27364499  |     |
| KBTBD2   | 0.29311609  | 0.07776315 | 2.27367399  |     |
| TMX2     | 0.29311814  | 0.07776315 | 2.27369143  |     |
| PUS7     | 0.29310836  | 0.07776315 | 2.27360838  |     |
| TSNAX    | 0.29315225  | 0.07776315 | 2.27398087  |     |

|           |             |            |             |     |
|-----------|-------------|------------|-------------|-----|
| PARP10    | -0.29313573 | 0.07776315 | -2.27384069 |     |
| NAT1      | 0.29310683  | 0.07776315 | 2.27359543  |     |
| TSHB      | -0.29306766 | 0.07781347 | -2.27326308 |     |
| CHRNA6    | -0.29305006 | 0.07782984 | -2.27311374 |     |
| DOC2BL    | -0.29302935 | 0.07785111 | -2.27293798 |     |
| PEX26     | -0.29301612 | 0.07786061 | -2.27282568 |     |
| C20orf185 | -0.29296944 | 0.07791146 | -2.27242964 |     |
| HILS1     | -0.29297193 | 0.07791146 | -2.27245075 |     |
| C1orf89   | -0.29295749 | 0.07791894 | -2.27232824 |     |
| TAS1R2    | -0.29294999 | 0.07791941 | -2.27226457 |     |
| LMOD2     | -0.29292002 | 0.07795530 | -2.27201035 |     |
| ICHTHYIN  | -0.29288628 | 0.07798581 | -2.27172402 |     |
| AQP7      | -0.29288662 | 0.07798581 | -2.27172696 |     |
| C10orf57  | 0.29285096  | 0.07803017 | 2.27142438  | yes |
| MNDA      | -0.29282842 | 0.07805439 | -2.27123315 |     |
| HCRTR1    | -0.29282090 | 0.07805489 | -2.27116937 |     |
| TKTL1     | -0.29280910 | 0.07806215 | -2.27106925 |     |
| KCNJ10    | -0.29280126 | 0.07806315 | -2.27100277 |     |
| RBBP5     | 0.29275010  | 0.07813258 | 2.27056878  |     |
| TMEM217   | -0.29270096 | 0.07819886 | -2.27015195 |     |
| BCLAF1    | 0.29269023  | 0.07820444 | 2.27006093  |     |
| HSD3B2    | -0.29267477 | 0.07821751 | -2.26992978 |     |
| EID1      | 0.29264311  | 0.07822204 | 2.26966125  |     |
| GARNL1    | 0.29264574  | 0.07822204 | 2.26968356  |     |
| POR       | 0.29266004  | 0.07822204 | 2.26980480  |     |
| TCL1A     | -0.29264600 | 0.07822204 | -2.26968574 |     |
| LOC57228  | 0.29260722  | 0.07826743 | 2.26935680  |     |
| GS85      | -0.29259272 | 0.07827143 | -2.26923379 |     |
| C9orf85   | 0.29259030  | 0.07827143 | 2.26921331  |     |
| RCHY1     | 0.29255431  | 0.07831346 | 2.26890804  |     |
| TRIM37    | 0.29254935  | 0.07831346 | 2.26886600  | yes |
| LOC645139 | 0.29253724  | 0.07832125 | 2.26876325  |     |
| ERP29     | -0.29250675 | 0.07834111 | -2.26850470 |     |
| GLCC1     | 0.29249891  | 0.07834111 | 2.26843816  |     |
| OR4K5     | -0.29249594 | 0.07834111 | -2.26841294 |     |
| SAP30L    | 0.29250725  | 0.07834111 | 2.26850890  |     |
| KRT75     | -0.29248773 | 0.07834271 | -2.26834338 |     |
| AFF4      | 0.29245362  | 0.07837395 | 2.26805411  |     |
| KRTAP13-3 | -0.29245820 | 0.07837395 | -2.26809291 |     |
| IFT52     | 0.29242707  | 0.07840463 | 2.26782890  | yes |
| DMWD      | -0.29238100 | 0.07844351 | -2.26743825 |     |
| SRL       | -0.29238097 | 0.07844351 | -2.26743795 |     |
| OR4C15    | -0.29238405 | 0.07844351 | -2.26746408 |     |
| MYO22     | -0.29236643 | 0.07845516 | -2.26731468 |     |
| DDX21     | 0.29234389  | 0.07847949 | 2.26712358  |     |
| TRIP11    | 0.29231338  | 0.07851647 | 2.26686486  |     |
| CDKN2D    | -0.29229610 | 0.07853084 | -2.26671830 |     |
| C20orf106 | -0.29228299 | 0.07853084 | -2.26660716 |     |
| TP53BP2   | 0.29228277  | 0.07853084 | 2.26660532  |     |
| DBX1      | -0.29223529 | 0.07859033 | -2.26620269 |     |

|           |             |            |             |     |
|-----------|-------------|------------|-------------|-----|
| SNORD33   | -0.29220483 | 0.07859033 | -2.26594444 |     |
| GNAL      | 0.29222989  | 0.07859033 | 2.26615693  |     |
| IL3       | -0.29221069 | 0.07859033 | -2.26599411 |     |
| OR2M7     | -0.29220220 | 0.07859033 | -2.26592216 |     |
| TSPAN18   | -0.29220920 | 0.07859033 | -2.26598146 |     |
| DNAJA4    | 0.29219081  | 0.07859701 | 2.26582560  | yes |
| FN3KRP    | 0.29212156  | 0.07868415 | 2.26523847  |     |
| RASSF5    | 0.29212442  | 0.07868415 | 2.26526273  |     |
| BCAS2     | 0.29208038  | 0.07871932 | 2.26488938  |     |
| FAM26F    | -0.29207789 | 0.07871932 | -2.26486827 |     |
| MICAL2    | 0.29208956  | 0.07871932 | 2.26496716  |     |
| SSTR3     | -0.29206354 | 0.07873073 | -2.26474657 |     |
| C10orf76  | 0.29197797  | 0.07885534 | 2.26402123  |     |
| RAD52     | 0.29196554  | 0.07886371 | 2.26391585  |     |
| SCN3B     | -0.29191988 | 0.07892495 | -2.26352884 |     |
| C6orf26   | -0.29191140 | 0.07892555 | -2.26345692 |     |
| CSDE1     | 0.29190516  | 0.07892555 | 2.26340406  |     |
| GPR139    | -0.29182393 | 0.07904351 | -2.26271551 |     |
| DNTT      | -0.29179571 | 0.07907705 | -2.26247635 |     |
| POU1F1    | -0.29175518 | 0.07912997 | -2.26213290 |     |
| PTTG1IP   | 0.29174818  | 0.07912997 | 2.26207356  |     |
| C18orf20  | -0.29172934 | 0.07914178 | -2.26191388 |     |
| ASTN2     | -0.29171953 | 0.07914178 | -2.26183073 |     |
| TNKS2     | 0.29171927  | 0.07914178 | 2.26182856  |     |
| IL25      | -0.29170794 | 0.07914843 | -2.26173249 |     |
| CIDECP    | -0.29168571 | 0.07914959 | -2.26154415 |     |
| LIX1      | -0.29169066 | 0.07914959 | -2.26158612 |     |
| TAF9      | 0.29169634  | 0.07914959 | 2.26163419  |     |
| PRMT6     | 0.29167771  | 0.07915093 | 2.26147636  |     |
| PRKAG1    | 0.29166040  | 0.07916711 | 2.26132967  |     |
| ATP2B1    | 0.29164548  | 0.07917949 | 2.26120324  |     |
| DENND2A   | -0.29160774 | 0.07919549 | -2.26088343 |     |
| LRMP      | 0.29160681  | 0.07919549 | 2.26087555  |     |
| LINGO3    | -0.29162424 | 0.07919549 | -2.26102325 |     |
| DBF4B     | -0.29160873 | 0.07919549 | -2.26089179 |     |
| UNQ1887   | 0.29158833  | 0.07920214 | 2.26071894  |     |
| LRRC38    | -0.29159062 | 0.07920214 | -2.26073832 |     |
| CLEC17A   | -0.29149341 | 0.07934228 | -2.25991463 |     |
| ZP4       | -0.29145720 | 0.07938870 | -2.25960790 |     |
| NAF1      | 0.29132928  | 0.07958195 | 2.25852412  |     |
| ZNF454    | -0.29131254 | 0.07959731 | -2.25838229 |     |
| RPL6      | 0.29126639  | 0.07965978 | 2.25799142  |     |
| FNDC5     | -0.29125542 | 0.07966589 | -2.25789849 |     |
| HNRPDL    | 0.29124686  | 0.07966815 | 2.25782592  |     |
| HRSP12    | 0.29123178  | 0.07968084 | 2.25769824  |     |
| MPPE1     | 0.29118207  | 0.07973761 | 2.25727713  |     |
| YIPF4     | 0.29118571  | 0.07973761 | 2.25730793  |     |
| FBXL5     | 0.29116795  | 0.07973802 | 2.25715757  |     |
| GGT1      | -0.29116751 | 0.07973802 | -2.25715378 |     |
| LOC375337 | -0.29115530 | 0.07974612 | -2.25705043 |     |

|           |             |            |             |
|-----------|-------------|------------|-------------|
| TOP1      | 0.29113103  | 0.07977359 | 2.25684481  |
| SNORD27   | 0.29112002  | 0.07977977 | 2.25675160  |
| STIP1     | 0.29106284  | 0.07980270 | 2.25626727  |
| LETMD1    | 0.29107480  | 0.07980270 | 2.25636854  |
| ZNF283    | 0.29109571  | 0.07980270 | 2.25654568  |
| PCOLCE    | -0.29106816 | 0.07980270 | -2.25631238 |
| TOP2B     | 0.29108732  | 0.07980270 | 2.25647465  |
| KCNK5     | -0.29107121 | 0.07980270 | -2.25633818 |
| NECAP1    | 0.29102815  | 0.07982504 | 2.25597347  |
| HSD17B11  | 0.29102748  | 0.07982504 | 2.25596783  |
| OR4P4     | -0.29103276 | 0.07982504 | -2.25601251 |
| PDE8A     | 0.29100652  | 0.07983575 | 2.25579029  |
| EIF1AY    | 0.29101164  | 0.07983575 | 2.25583369  |
| USP7      | 0.29097892  | 0.07986859 | 2.25555658  |
| OR13F1    | -0.29096512 | 0.07987928 | -2.25543973 |
| FTL       | 0.29089550  | 0.07997967 | 2.25485013  |
| LOC119358 | -0.29086820 | 0.08001208 | -2.25461896 |
| ANKRD34B  | -0.29082312 | 0.08005626 | -2.25423729 |
| NR2C1     | 0.29083082  | 0.08005626 | 2.25430241  |
| THAP3     | -0.29081931 | 0.08005626 | -2.25420496 |
| LAMP2     | 0.29079744  | 0.08007995 | 2.25401982  |
| MAP7D1    | -0.29078598 | 0.08008690 | -2.25392278 |
| TTC8      | 0.29076231  | 0.08010577 | 2.25372239  |
| ALB       | -0.29073857 | 0.08010577 | -2.25352134 |
| EXT1      | 0.29074257  | 0.08010577 | 2.25355521  |
| GTDC1     | 0.29075063  | 0.08010577 | 2.25362351  |
| SLC22A13  | -0.29075737 | 0.08010577 | -2.25368057 |
| BTG3      | 0.29067823  | 0.08019142 | 2.25301051  |
| ANKS3     | -0.29064957 | 0.08019162 | -2.25276790 |
| PFKP      | 0.29066333  | 0.08019162 | 2.25288435  |
| XRN1      | 0.29065316  | 0.08019162 | 2.25279821  |
| C20orf72  | 0.29066296  | 0.08019162 | 2.25288120  |
| CHGA      | -0.29058832 | 0.08023405 | -2.25224931 |
| TMEM136   | 0.29058758  | 0.08023405 | 2.25224309  |
| HBP1      | 0.29059654  | 0.08023405 | 2.25231891  |
| TBC1D19   | 0.29058942  | 0.08023405 | 2.25225865  |
| OTOF      | -0.29060600 | 0.08023405 | -2.25239898 |
| C12orf28  | -0.29053887 | 0.08026857 | -2.25183074 |
| EHD2      | -0.29052811 | 0.08026857 | -2.25173960 |
| ZNF705A   | -0.29051628 | 0.08026857 | -2.25163947 |
| RPL11     | 0.29051930  | 0.08026857 | 2.25166505  |
| IKZF5     | 0.29052781  | 0.08026857 | 2.25173710  |
| FGF23     | -0.29055340 | 0.08026857 | -2.25195373 |
| CBX4      | -0.29051645 | 0.08026857 | -2.25164090 |
| JMJD3     | -0.29049084 | 0.08029809 | -2.25142412 |
| HIBCH     | 0.29047557  | 0.08030279 | 2.25129490  |
| OR2W3     | -0.29046676 | 0.08030279 | -2.25122036 |
| AQP9      | -0.29046656 | 0.08030279 | -2.25121860 |
| FOXRED2   | -0.29045319 | 0.08031286 | -2.25110542 |
| FAM185A   | 0.29043045  | 0.08033775 | 2.25091301  |

|           |             |            |             |     |
|-----------|-------------|------------|-------------|-----|
| OR2W5     | -0.29042351 | 0.08033775 | -2.25085424 |     |
| MEPE      | -0.29039662 | 0.08036963 | -2.25062665 |     |
| AEBP2     | 0.29037497  | 0.08039307 | 2.25044343  |     |
| TCF23     | -0.29029985 | 0.08042194 | -2.24980766 |     |
| OR10G8    | -0.29031638 | 0.08042194 | -2.24994750 |     |
| LOC390940 | 0.29033310  | 0.08042194 | 2.25008903  |     |
| LMO1      | -0.29028382 | 0.08042194 | -2.24967195 |     |
| PTPN2     | 0.29028649  | 0.08042194 | 2.24969458  |     |
| C5orf54   | 0.29031896  | 0.08042194 | 2.24996933  |     |
| WASF4     | -0.29029538 | 0.08042194 | -2.24976978 |     |
| SEH1L     | 0.29030631  | 0.08042194 | 2.24986230  |     |
| FBXL10    | 0.29027883  | 0.08042194 | 2.24962974  |     |
| COG7      | 0.29031342  | 0.08042194 | 2.24992246  |     |
| ZMYM4     | 0.29029045  | 0.08042194 | 2.24972804  |     |
| LMAN1     | 0.29026166  | 0.08043818 | 2.24948438  |     |
| NID2      | -0.29021588 | 0.08050059 | -2.24909701 |     |
| HSD17B3   | 0.29020737  | 0.08050286 | 2.24902499  |     |
| RBM44     | -0.29013058 | 0.08061173 | -2.24837515 |     |
| THNSL1    | 0.29012575  | 0.08061173 | 2.24833434  |     |
| COL4A4    | -0.29005312 | 0.08071770 | -2.24771973 |     |
| PDE2A     | -0.29004091 | 0.08072596 | -2.24761641 |     |
| ARPC5     | 0.29001021  | 0.08076414 | 2.24735670  |     |
| SCN4B     | -0.28995293 | 0.08084539 | -2.24687206 |     |
| LOC729862 | -0.28993919 | 0.08085613 | -2.24675585 |     |
| C21orf63  | 0.28989377  | 0.08091823 | 2.24637155  |     |
| MRPL43    | 0.28985348  | 0.08097204 | 2.24603068  |     |
| TRUB1     | 0.28978074  | 0.08107021 | 2.24541537  |     |
| CTAG2     | -0.28977877 | 0.08107021 | -2.24539872 |     |
| USP39     | 0.28972064  | 0.08115309 | 2.24490698  |     |
| BBS7      | 0.28969280  | 0.08118678 | 2.24467157  |     |
| KLRG2     | -0.28968441 | 0.08118888 | -2.24460055 |     |
| ADCY4     | -0.28963346 | 0.08122983 | -2.24416965 |     |
| SLC10A4   | -0.28963747 | 0.08122983 | -2.24420356 |     |
| SLC25A4   | 0.28964694  | 0.08122983 | 2.24428366  |     |
| LCE2A     | -0.28962370 | 0.08122983 | -2.24408708 |     |
| VHLL      | -0.28962704 | 0.08122983 | -2.24411534 |     |
| PNPLA3    | -0.28959734 | 0.08126115 | -2.24386412 |     |
| SNORD58A  | 0.28958752  | 0.08126557 | 2.24378111  |     |
| SPINK9    | -0.28956992 | 0.08128264 | -2.24363227 |     |
| MS4A10    | -0.28953780 | 0.08132335 | -2.24336063 |     |
| LEPREL2   | -0.28945703 | 0.08143046 | -2.24267753 |     |
| TBC1D23   | 0.28945424  | 0.08143046 | 2.24265392  |     |
| BARX2     | -0.28945073 | 0.08143046 | -2.24262426 |     |
| ST3GAL2   | -0.28944317 | 0.08143120 | -2.24256035 | yes |
| IFITM5    | -0.28943172 | 0.08143830 | -2.24246351 |     |
| RNF11     | 0.28937637  | 0.08151693 | 2.24199551  |     |
| PCNT      | -0.28934748 | 0.08155247 | -2.24175122 |     |
| GHRL      | -0.28932295 | 0.08158092 | -2.24154377 |     |
| NXPH4     | -0.28924522 | 0.08161526 | -2.24088662 |     |
| OR2M5     | -0.28924714 | 0.08161526 | -2.24090284 |     |



|              |             |            |             |     |
|--------------|-------------|------------|-------------|-----|
| OR8G2        | -0.28924515 | 0.08161526 | -2.24088602 |     |
| PRMT2        | 0.28927820  | 0.08161526 | 2.24116545  |     |
| C11orf87     | -0.28928250 | 0.08161526 | -2.24120176 |     |
| LGR4         | 0.28925113  | 0.08161526 | 2.24093659  |     |
| PCDHA2       | -0.28924966 | 0.08161526 | -2.24092414 |     |
| RGL3         | -0.28925739 | 0.08161526 | -2.24098945 |     |
| KIAA1033     | 0.28920104  | 0.08167569 | 2.24051305  |     |
| STK16        | 0.28919037  | 0.08168153 | 2.24042286  |     |
| BOC          | -0.28918181 | 0.08168394 | -2.24035046 |     |
| DSCR3        | 0.28911663  | 0.08172588 | 2.23979946  |     |
| CRYGN        | -0.28912206 | 0.08172588 | -2.23984534 |     |
| SETX         | 0.28911361  | 0.08172588 | 2.23977391  |     |
| C19orf30     | -0.28911540 | 0.08172588 | -2.23978902 |     |
| PSG3         | -0.28914505 | 0.08172588 | -2.24003969 |     |
| OR1E2        | -0.28912812 | 0.08172588 | -2.23989658 |     |
| GYS2         | -0.28907354 | 0.08177227 | -2.23943517 |     |
| NTF4         | -0.28906400 | 0.08177227 | -2.23935452 |     |
| PLA2G6       | -0.28906396 | 0.08177227 | -2.23935420 |     |
| LIME1        | -0.28905459 | 0.08177601 | -2.23927498 |     |
| FLJ43826     | -0.28901475 | 0.08182564 | -2.23893820 |     |
| MRC2         | -0.28901006 | 0.08182564 | -2.23889857 | yes |
| C14orf133    | 0.28896706  | 0.08188437 | 2.23853511  |     |
| AASDH        | 0.28895802  | 0.08188757 | 2.23845873  |     |
| OR10K2       | -0.28889034 | 0.08198291 | -2.23788671 |     |
| MDM1         | 0.28888560  | 0.08198291 | 2.23784658  |     |
| POT1         | 0.28884908  | 0.08202026 | 2.23753796  |     |
| IER5         | -0.28884863 | 0.08202026 | -2.23753413 |     |
| LOC100130285 | -0.28882603 | 0.08202250 | -2.23734317 |     |
| ZIM3         | -0.28883127 | 0.08202250 | -2.23738741 |     |
| LTB          | -0.28882762 | 0.08202250 | -2.23735660 |     |
| OR7G3        | -0.28878272 | 0.08204709 | -2.23697713 |     |
| JPH3         | -0.28880206 | 0.08204709 | -2.23714058 |     |
| IFT88        | 0.28879614  | 0.08204709 | 2.23709054  |     |
| SERTAD2      | 0.28878575  | 0.08204709 | 2.23700270  |     |
| MLF1         | 0.28874590  | 0.08209582 | 2.23666597  |     |
| NDUFA12      | 0.28873042  | 0.08210959 | 2.23653519  |     |
| PRPF8        | 0.28870934  | 0.08213256 | 2.23635700  |     |
| ATP8B1       | 0.28868589  | 0.08214782 | 2.23615883  |     |
| LRRC59       | 0.28869064  | 0.08214782 | 2.23619903  |     |
| SYCP1        | -0.28863627 | 0.08221759 | -2.23573959 |     |
| IPO8         | 0.28861214  | 0.08224558 | 2.23553568  |     |
| CDH10        | -0.28858972 | 0.08227077 | -2.23534625 |     |
| ESCO1        | 0.28855812  | 0.08230765 | 2.23507922  |     |
| ATAD2B       | 0.28855312  | 0.08230765 | 2.23503696  |     |
| DSP          | 0.28849883  | 0.08237359 | 2.23457829  |     |
| P4HA3        | -0.28850426 | 0.08237359 | -2.23462422 |     |
| BHMT         | -0.28846014 | 0.08242556 | -2.23425141 |     |
| IGF2BP3      | 0.28844759  | 0.08243457 | 2.23414536  |     |
| CYP4X1       | -0.28842442 | 0.08244942 | -2.23394967 |     |
| FLJ44881     | -0.28843139 | 0.08244942 | -2.23400852 |     |

|           |             |            |             |     |
|-----------|-------------|------------|-------------|-----|
| SPCS3     | 0.28839568  | 0.08247345 | 2.23370682  |     |
| DSCR8     | -0.28840076 | 0.08247345 | -2.23374973 |     |
| SGK196    | 0.28838827  | 0.08247402 | 2.23364427  |     |
| RPS2P11   | -0.28835923 | 0.08249854 | -2.23339898 |     |
| PRR7      | -0.28836029 | 0.08249854 | -2.23340788 |     |
| SSBP4     | -0.28832138 | 0.08254919 | -2.23307920 |     |
| HMGB3L1   | -0.28831244 | 0.08255228 | -2.23300370 |     |
| ALG5      | 0.28827443  | 0.08260322 | 2.23268262  |     |
| PTPLAD2   | 0.28821491  | 0.08268962 | 2.23217982  |     |
| LOC136242 | -0.28819617 | 0.08270381 | -2.23202154 |     |
| TAGLN     | -0.28819217 | 0.08270381 | -2.23198782 |     |
| PDCD6IP   | 0.28815675  | 0.08275055 | 2.23168866  | yes |
| PPA1      | 0.28812842  | 0.08278562 | 2.23144937  |     |
| CYP1A2    | -0.28811053 | 0.08280200 | -2.23129826 |     |
| VANGL1    | 0.28810438  | 0.08280200 | 2.23124629  |     |
| TOR1A     | 0.28807024  | 0.08284667 | 2.23095800  |     |
| SNX26     | -0.28797568 | 0.08295617 | -2.23015945 |     |
| WDR43     | 0.28797713  | 0.08295617 | 2.23017166  |     |
| GCAT      | -0.28798151 | 0.08295617 | -2.23020864 |     |
| PPP1R15B  | 0.28798090  | 0.08295617 | 2.23020353  |     |
| RNF187    | -0.28795668 | 0.08297591 | -2.22999897 |     |
| SMPDL3B   | -0.28792100 | 0.08301287 | -2.22969771 |     |
| TM9SF3    | 0.28792019  | 0.08301287 | 2.22969088  |     |
| ERI2      | 0.28783548  | 0.08305521 | 2.22897555  |     |
| MRGPRE    | -0.28785864 | 0.08305521 | -2.22917110 |     |
| FBXO21    | 0.28785844  | 0.08305521 | 2.22916943  |     |
| FSCN2     | -0.28782407 | 0.08305521 | -2.22887927 |     |
| P4HA1     | 0.28788272  | 0.08305521 | 2.22937445  |     |
| NOSIP     | -0.28784695 | 0.08305521 | -2.22907245 |     |
| PKN2      | 0.28783341  | 0.08305521 | 2.22895813  |     |
| PRMT8     | -0.28783728 | 0.08305521 | -2.22899082 |     |
| FAM108A1  | -0.28782862 | 0.08305521 | -2.22891765 |     |
| CD59      | 0.28782562  | 0.08305521 | 2.22889235  |     |
| TTC33     | 0.28780424  | 0.08306471 | 2.22871181  |     |
| GAPVD1    | 0.28780608  | 0.08306471 | 2.22872734  |     |
| C21orf89  | -0.28778305 | 0.08306481 | -2.22853288 |     |
| GADD45B   | -0.28778508 | 0.08306481 | -2.22855007 |     |
| NEDD8     | 0.28779029  | 0.08306481 | 2.22859405  |     |
| ST7L      | 0.28777553  | 0.08306560 | 2.22846940  |     |
| C20orf135 | -0.28774891 | 0.08309796 | -2.22824468 |     |
| ZZZ3      | 0.28772657  | 0.08312325 | 2.22805609  |     |
| KIAA1210  | -0.28771909 | 0.08312398 | -2.22799291 |     |
| ZNF616    | 0.28770252  | 0.08313974 | 2.22785302  |     |
| COQ7      | 0.28766412  | 0.08316833 | 2.22752884  |     |
| KCNH4     | -0.28767722 | 0.08316833 | -2.22763943 |     |
| TP53TG5   | -0.28766592 | 0.08316833 | -2.22754404 |     |
| GJA3      | -0.28765585 | 0.08317038 | -2.22745898 |     |
| CNPY1     | -0.28764142 | 0.08317789 | -2.22733716 |     |
| ZNF799    | 0.28763724  | 0.08317789 | 2.22730189  |     |
| HRH2      | -0.28761792 | 0.08319820 | -2.22713885 |     |

|              |             |            |             |     |
|--------------|-------------|------------|-------------|-----|
| FCGR2B       | 0.28757500  | 0.08325469 | 2.22677653  |     |
| SLC11A1      | -0.28756972 | 0.08325469 | -2.22673196 |     |
| MRPL54       | -0.28755394 | 0.08326918 | -2.22659869 |     |
| KANK2        | -0.28752238 | 0.08330979 | -2.22633234 |     |
| TRAPPC3      | 0.28747366  | 0.08335554 | 2.22592113  |     |
| ACAT2        | 0.28747833  | 0.08335554 | 2.22596051  |     |
| ATP2A1       | -0.28747490 | 0.08335554 | -2.22593154 |     |
| CPZ          | -0.28743879 | 0.08339004 | -2.22562675 |     |
| LHX4         | -0.28744084 | 0.08339004 | -2.22564407 |     |
| PAAF1        | 0.28741508  | 0.08341768 | 2.22542667  |     |
| FAM173A      | -0.28740654 | 0.08342019 | -2.22535459 |     |
| LOC100133372 | -0.28738596 | 0.08342534 | -2.22518090 |     |
| WDR77        | 0.28739386  | 0.08342534 | 2.22524757  |     |
| FCRL4        | -0.28738236 | 0.08342534 | -2.22515046 |     |
| MYH2         | -0.28734190 | 0.08348077 | -2.22480904 |     |
| EXTL2        | 0.28728179  | 0.08356886 | 2.22430172  |     |
| LRRC20       | -0.28725381 | 0.08360365 | -2.22406558 |     |
| NCK1         | 0.28722080  | 0.08364680 | 2.22378709  |     |
| CPLP         | -0.28720418 | 0.08366275 | -2.22364679 |     |
| PLEK2        | 0.28717397  | 0.08370127 | 2.22339189  |     |
| TMEM179      | -0.28716222 | 0.08370913 | -2.22329273 |     |
| C7orf34      | -0.28714092 | 0.08373285 | -2.22311304 |     |
| BLZF1        | 0.28710870  | 0.08377476 | 2.22284115  |     |
| CIB1         | 0.28709182  | 0.08377634 | 2.22269870  |     |
| RNASE11      | -0.28709438 | 0.08377634 | -2.22272031 |     |
| OR4L1        | -0.28706562 | 0.08377634 | -2.22247769 |     |
| OR2J2        | -0.28708610 | 0.08377634 | -2.22265049 |     |
| TFR2         | -0.28707026 | 0.08377634 | -2.22251683 |     |
| HSDL1        | 0.28707349  | 0.08377634 | 2.22254405  |     |
| ZNF638       | 0.28705356  | 0.08378472 | 2.22237594  |     |
| BTNL8        | -0.28704416 | 0.08378869 | -2.22229660 |     |
| RAVER1       | -0.28696060 | 0.08389270 | -2.22159163 |     |
| RHAG         | -0.28696179 | 0.08389270 | -2.22160162 |     |
| SNORA20      | -0.28696389 | 0.08389270 | -2.22161934 | yes |
| CLEC4E       | -0.28694927 | 0.08389556 | -2.22149603 |     |
| LCE1A        | -0.28694485 | 0.08389556 | -2.22145877 |     |
| SALL1        | -0.28693725 | 0.08389655 | -2.22139459 |     |
| YPEL5        | 0.28688877  | 0.08395655 | 2.22098568  |     |
| BMX          | -0.28688719 | 0.08395655 | -2.22097228 |     |
| ZCCHC10      | 0.28687549  | 0.08396435 | 2.22087362  |     |
| USP44        | -0.28686223 | 0.08397475 | -2.22076179 |     |
| CDH9         | -0.28681565 | 0.08404070 | -2.22036882 |     |
| ILK          | -0.28679065 | 0.08405899 | -2.22015796 |     |
| CIAO1        | 0.28679107  | 0.08405899 | 2.22016146  |     |
| STK38L       | 0.28673146  | 0.08414602 | 2.21965869  |     |
| FSTL3        | -0.28667664 | 0.08422582 | -2.21919633 | yes |
| RP3-474I12.5 | -0.28665952 | 0.08424271 | -2.21905191 |     |
| NAPEPLD      | 0.28659167  | 0.08434435 | 2.21847970  |     |
| LOC728285    | -0.28655938 | 0.08438662 | -2.21820737 |     |
| CA12         | 0.28654611  | 0.08439709 | 2.21809547  |     |

|              |             |            |             |
|--------------|-------------|------------|-------------|
| OSBPL9       | 0.28652521  | 0.08441091 | 2.21791916  |
| N-PAC        | 0.28652383  | 0.08441091 | 2.21790757  |
| CD46         | 0.28646307  | 0.08449128 | 2.21739517  |
| MTFR1        | 0.28646179  | 0.08449128 | 2.21738434  |
| FBXO11       | 0.28644965  | 0.08449986 | 2.21728204  |
| LOC389203    | 0.28642578  | 0.08452809 | 2.21708072  |
| RBM46        | -0.28640640 | 0.08453707 | -2.21691735 |
| LOC388796    | 0.28640709  | 0.08453707 | 2.21692315  |
| SNORD15B     | -0.28637242 | 0.08457053 | -2.21663079 |
| PTCHD3       | -0.28637771 | 0.08457053 | -2.21667540 |
| LACTB2       | 0.28635977  | 0.08457998 | 2.21652413  |
| EPC2         | 0.28635217  | 0.08458099 | 2.21646003  |
| OTOL1        | -0.28633205 | 0.08459123 | -2.21629042 |
| KIAA1147     | 0.28633763  | 0.08459123 | 2.21633744  |
| NEUROD6      | -0.28631512 | 0.08460786 | -2.21614770 |
| OR13C4       | -0.28630447 | 0.08461398 | -2.21605785 |
| SERPINB8     | 0.28629008  | 0.08462184 | 2.21593657  |
| INO80B       | -0.28628578 | 0.08462184 | -2.21590030 |
| LOC100129488 | -0.28627796 | 0.08462322 | -2.21583435 |
| C1QBP        | 0.28626320  | 0.08463623 | 2.21570991  |
| LBR          | 0.28612451  | 0.08484538 | 2.21454071  |
| TPH1         | 0.28612658  | 0.08484538 | 2.21455813  |
| ELL3         | 0.28611622  | 0.08484756 | 2.21447076  |
| ALKBH3       | 0.28610516  | 0.08484784 | 2.21437758  |
| GSR          | 0.28610206  | 0.08484784 | 2.21435141  |
| PLA2G12B     | -0.28608214 | 0.08485779 | -2.21418354 |
| CYTH1        | 0.28608839  | 0.08485779 | 2.21423619  |
| TFEB         | -0.28605024 | 0.08489961 | -2.21391465 |
| LOX          | 0.28598748  | 0.08496982 | 2.21338559  |
| LRRCS2       | -0.28599447 | 0.08496982 | -2.21344454 |
| P2RY12       | -0.28598952 | 0.08496982 | -2.21340283 |
| TREML3       | -0.28596684 | 0.08497766 | -2.21321160 |
| TAF3         | -0.28596605 | 0.08497766 | -2.21320498 |
| SYVN1        | -0.28596184 | 0.08497766 | -2.21316949 |
| SH2D5        | -0.28592657 | 0.08502519 | -2.21287226 |
| GATA4        | -0.28589092 | 0.08507341 | -2.21257173 |
| MYH8         | -0.28586549 | 0.08510443 | -2.21235744 |
| RP11-90M2.3  | -0.28582808 | 0.08512146 | -2.21204214 |
| ZCCHC12      | -0.28584648 | 0.08512146 | -2.21219725 |
| SMAD5        | 0.28582742  | 0.08512146 | 2.21203659  |
| TBC1D14      | 0.28584003  | 0.08512146 | 2.21214288  |
| ARPC3        | 0.28581240  | 0.08512978 | 2.21190997  |
| OSTM1        | 0.28580851  | 0.08512978 | 2.21187719  |
| TMEM167B     | 0.28578813  | 0.08515232 | 2.21170544  |
| CNTNAP2      | -0.28573559 | 0.08518821 | -2.21126274 |
| ACOXL        | -0.28573528 | 0.08518821 | -2.21126009 |
| LANCL2       | 0.28573283  | 0.08518821 | 2.21123949  |
| RSRC2        | 0.28574009  | 0.08518821 | 2.21130066  |
| KRT37        | -0.28573189 | 0.08518821 | -2.21123155 |
| RBM41        | 0.28571554  | 0.08520398 | 2.21109380  |

|            |             |            |             |     |
|------------|-------------|------------|-------------|-----|
| C6orf155   | -0.28568927 | 0.08523649 | -2.21087236 |     |
| FBXO18     | 0.28567669  | 0.08524591 | 2.21076640  |     |
| PTCHD1     | -0.28566031 | 0.08526174 | -2.21062840 |     |
| RMND5A     | 0.28564991  | 0.08526751 | 2.21054074  | yes |
| ZNF45      | 0.28562195  | 0.08530286 | 2.21030516  |     |
| FAM9C      | -0.28555692 | 0.08540075 | -2.20975719 | yes |
| ISX        | -0.28551504 | 0.08545964 | -2.20940435 |     |
| LOC440419  | -0.28544300 | 0.08555772 | -2.20879744 |     |
| TRIM11     | -0.28544426 | 0.08555772 | -2.20880808 |     |
| LRP2       | -0.28542400 | 0.08557456 | -2.20863737 |     |
| ZW10       | 0.28541908  | 0.08557456 | 2.20859593  |     |
| C14orf166B | -0.28539067 | 0.08557764 | -2.20835656 |     |
| LTA        | -0.28540299 | 0.08557764 | -2.20846035 |     |
| NACAP1     | -0.28539405 | 0.08557764 | -2.20838509 |     |
| MYOCD      | -0.28538936 | 0.08557764 | -2.20834552 |     |
| PRELID1    | 0.28535970  | 0.08560702 | 2.20809570  |     |
| FBXL15     | -0.28535802 | 0.08560702 | -2.20808157 |     |
| GDE1       | 0.28533022  | 0.08564222 | 2.20784738  |     |
| FMO3       | 0.28531758  | 0.08564317 | 2.20774093  |     |
| EDEM1      | 0.28531572  | 0.08564317 | 2.20772520  |     |
| LSM14A     | 0.28529373  | 0.08566342 | 2.20753997  |     |
| NETO1      | -0.28528980 | 0.08566342 | -2.20750689 |     |
| SIX3       | -0.28526867 | 0.08568736 | -2.20732891 |     |
| SLITRK2    | -0.28516985 | 0.08584280 | -2.20649655 |     |
| TXNDC3     | -0.28510444 | 0.08594181 | -2.20594566 |     |
| MAGEA8     | -0.28509718 | 0.08594229 | -2.20588458 |     |
| IK         | 0.28504136  | 0.08602514 | 2.20541441  |     |
| TRMT11     | 0.28501183  | 0.08606342 | 2.20516572  |     |
| UQCRB      | 0.28496437  | 0.08613214 | 2.20476610  |     |
| LRRC58     | 0.28491471  | 0.08620466 | 2.20434792  |     |
| KCNC4      | -0.28489940 | 0.08620698 | -2.20421905 |     |
| PAGE2B     | -0.28490347 | 0.08620698 | -2.20425330 |     |
| DSCAM      | -0.28486954 | 0.08623671 | -2.20396756 |     |
| C1orf97    | 0.28486798  | 0.08623671 | 2.20395441  |     |
| ALDH1L1    | -0.28480649 | 0.08631173 | -2.20343674 |     |
| NLGN1      | -0.28478529 | 0.08631173 | -2.20325825 |     |
| KRTAP19-2  | -0.28479659 | 0.08631173 | -2.20335334 |     |
| RDH14      | 0.28479598  | 0.08631173 | 2.20334821  |     |
| C14orf139  | -0.28480489 | 0.08631173 | -2.20342323 |     |
| ECE2       | -0.28478205 | 0.08631173 | -2.20323098 |     |
| NHLRC2     | 0.28476048  | 0.08633658 | 2.20304935  |     |
| DNAJB12    | -0.28474540 | 0.08633947 | -2.20292238 |     |
| ACTR3B     | 0.28474486  | 0.08633947 | 2.20291780  |     |
| STARD8     | -0.28472818 | 0.08635601 | -2.20277737 |     |
| C7orf33    | -0.28467733 | 0.08643069 | -2.20234930 |     |
| TNRC4      | -0.28463864 | 0.08648472 | -2.20202359 |     |
| IRAK1BP1   | 0.28460784  | 0.08652532 | 2.20176435  |     |
| CYP11A1    | -0.28459442 | 0.08652803 | -2.20165140 |     |
| C12orf40   | -0.28459233 | 0.08652803 | -2.20163380 |     |
| OR8A1      | -0.28456750 | 0.08655848 | -2.20142476 |     |

|              |             |            |             |     |
|--------------|-------------|------------|-------------|-----|
| RG9MTD1      | 0.28447339  | 0.08670711 | 2.20063259  |     |
| PTAR1        | 0.28440569  | 0.08681082 | 2.20006278  |     |
| SNORA5C      | -0.28438124 | 0.08684070 | -2.19985704 |     |
| NUP210L      | -0.28435640 | 0.08687127 | -2.19964792 | yes |
| OR11A1       | -0.28431656 | 0.08692747 | -2.19931268 |     |
| ENTPD4       | 0.28429808  | 0.08693578 | 2.19915713  |     |
| KIAA0100     | 0.28429778  | 0.08693578 | 2.19915465  |     |
| PFN2         | 0.28428099  | 0.08695260 | 2.19901334  |     |
| ZNF197       | 0.28425633  | 0.08698289 | 2.19880578  |     |
| TSSC4        | -0.28424340 | 0.08699311 | -2.19869699 |     |
| PCBP1        | 0.28423451  | 0.08699641 | 2.19862220  |     |
| OR1M1        | -0.28422313 | 0.08700399 | -2.19852638 |     |
| HINT3        | 0.28420179  | 0.08701670 | 2.19834683  |     |
| REST         | 0.28420496  | 0.08701670 | 2.19837352  |     |
| KIFC2        | -0.28419405 | 0.08701805 | -2.19828170 |     |
| CD3EAP       | -0.28413436 | 0.08707672 | -2.19777947 |     |
| SLC35A4      | 0.28414042  | 0.08707672 | 2.19783043  |     |
| HMGB4        | -0.28413484 | 0.08707672 | -2.19778348 |     |
| FAM170B      | -0.28413196 | 0.08707672 | -2.19775926 |     |
| LUZP2        | -0.28412072 | 0.08708407 | -2.19766466 |     |
| PEG3         | -0.28409574 | 0.08711493 | -2.19745453 |     |
| FGF13        | 0.28408760  | 0.08711698 | 2.19738603  |     |
| ZC4H2        | -0.28406805 | 0.08713856 | -2.19722155 |     |
| SLC25A46     | 0.28405944  | 0.08714142 | 2.19714904  |     |
| C10orf78     | 0.28403346  | 0.08717402 | 2.19693048  |     |
| ZYG11B       | 0.28402093  | 0.08718359 | 2.19682503  |     |
| ADH7         | 0.28400557  | 0.08719664 | 2.19669586  |     |
| ROM1         | -0.28399942 | 0.08719664 | -2.19664409 |     |
| N6AMT1       | 0.28398757  | 0.08719867 | 2.19654439  |     |
| IRS2         | -0.28398434 | 0.08719867 | -2.19651725 |     |
| LOC100133383 | -0.28395748 | 0.08723282 | -2.19629122 |     |
| PARK7        | 0.28392007  | 0.08728504 | 2.19597655  |     |
| FAM164A      | 0.28389663  | 0.08731334 | 2.19577936  |     |
| LOC100133373 | 0.28386212  | 0.08736064 | 2.19548902  |     |
| TBCKL        | 0.28384291  | 0.08738170 | 2.19532739  |     |
| UBQLN1       | 0.28382374  | 0.08739078 | 2.19516614  |     |
| ZCCHC8       | 0.28382551  | 0.08739078 | 2.19518109  |     |
| COL6A1       | -0.28378271 | 0.08744930 | -2.19482104 | yes |
| C5orf48      | -0.28375474 | 0.08748542 | -2.19458577 |     |
| MITD1        | 0.28368654  | 0.08754300 | 2.19401210  |     |
| FUCA2        | 0.28369260  | 0.08754300 | 2.19406314  |     |
| MRPS21       | 0.28369288  | 0.08754300 | 2.19406542  | yes |
| RBKS         | 0.28369460  | 0.08754300 | 2.19407992  |     |
| SNRPE        | 0.28370259  | 0.08754300 | 2.19414717  |     |
| PVALB        | -0.28367161 | 0.08755673 | -2.19388657 |     |
| VASP         | -0.28363953 | 0.08759996 | -2.19361675 |     |
| C19orf67     | -0.28361025 | 0.08763838 | -2.19337052 |     |
| VPS45        | 0.28358997  | 0.08764940 | 2.19319997  |     |
| PCM1         | 0.28359364  | 0.08764940 | 2.19323083  |     |
| RB1          | 0.28357045  | 0.08767107 | 2.19303574  |     |

|              |             |            |             |
|--------------|-------------|------------|-------------|
| C6orf64      | 0.28353800  | 0.08771497 | 2.19276289  |
| B4GALNT2     | -0.28351803 | 0.08772547 | -2.19259494 |
| KPNA5        | 0.28351903  | 0.08772547 | 2.19260338  |
| FCF1         | 0.28350130  | 0.08774234 | 2.19245427  |
| C17orf60     | -0.28345991 | 0.08778174 | -2.19210619 |
| HTR1E        | -0.28346138 | 0.08778174 | -2.19211852 |
| RXRB         | -0.28345762 | 0.08778174 | -2.19208698 |
| LOC51233     | -0.28343484 | 0.08779711 | -2.19189541 |
| YTHDF1       | 0.28343745  | 0.08779711 | 2.19191733  |
| RLN3         | -0.28341781 | 0.08781451 | -2.19175218 |
| IL28A        | -0.28338366 | 0.08785431 | -2.19146499 |
| ZNFX1        | 0.28338085  | 0.08785431 | 2.19144142  |
| UTP20        | 0.28336375  | 0.08787184 | 2.19129764  |
| ATP5L        | 0.28327212  | 0.08795664 | 2.19052720  |
| C9orf62      | -0.28326908 | 0.08795664 | -2.19050167 |
| AADAT        | 0.28325916  | 0.08795664 | 2.19041827  |
| CACNA1C      | -0.28330613 | 0.08795664 | -2.19081312 |
| RPAP2        | 0.28328814  | 0.08795664 | 2.19066190  |
| TM2D3        | 0.28328950  | 0.08795664 | 2.19067329  |
| RNASE7       | -0.28326595 | 0.08795664 | -2.19047531 |
| MS4A3        | -0.28326816 | 0.08795664 | -2.19049393 |
| DNAJC14      | 0.28325144  | 0.08795804 | 2.19035330  |
| KLF16        | -0.28323750 | 0.08797014 | -2.19023610 |
| KIF7         | -0.28317737 | 0.08806193 | -2.18973061 |
| LIN7B        | -0.28313767 | 0.08811605 | -2.18939688 |
| LAPTM4A      | 0.28313218  | 0.08811605 | 2.18935073  |
| MREG         | 0.28312403  | 0.08811817 | 2.18928224  |
| FAM162A      | 0.28311695  | 0.08811846 | 2.18922269  |
| EIF2B2       | 0.28310492  | 0.08812729 | 2.18912155  |
| C17orf85     | 0.28307178  | 0.08817258 | 2.18884298  |
| XRR1         | 0.28305291  | 0.08819323 | 2.18868434  |
| ZNF33A       | 0.28302175  | 0.08823512 | 2.18842244  |
| CXorf38      | 0.28300912  | 0.08824500 | 2.18831626  |
| CBX7         | -0.28299272 | 0.08824944 | -2.18817845 |
| PCDHGA2      | -0.28299499 | 0.08824944 | -2.18819749 |
| LOC100130356 | -0.28294352 | 0.08832256 | -2.18776488 |
| GALK1        | -0.28293164 | 0.08833116 | -2.18766501 |
| CNKSR3       | 0.28288950  | 0.08839211 | 2.18731083  |
| RASSF3       | -0.28284803 | 0.08845193 | -2.18696231 |
| KIAA0841     | -0.28278186 | 0.08854261 | -2.18640619 |
| UBR5         | 0.28278353  | 0.08854261 | 2.18642022  |
| SST          | -0.28274758 | 0.08859004 | -2.18611816 |
| PKIG         | -0.28273155 | 0.08860585 | -2.18598346 |
| BCAP31       | 0.28271978  | 0.08861428 | 2.18588450  |
| C9orf84      | 0.28268294  | 0.08864222 | 2.18557492  |
| OR5B12       | -0.28269489 | 0.08864222 | -2.18567536 |
| MUC4         | 0.28268454  | 0.08864222 | 2.18558841  |
| LMTK2        | 0.28266024  | 0.08864989 | 2.18538422  |
| RAP1B        | 0.28265779  | 0.08864989 | 2.18536360  |
| BFSP1        | -0.28266691 | 0.08864989 | -2.18544025 |



|              |             |            |             |     |
|--------------|-------------|------------|-------------|-----|
| LOC100129648 | -0.28262408 | 0.08869639 | -2.18508035 |     |
| KRTAP13-1    | -0.28260531 | 0.08870498 | -2.18492268 |     |
| KIAA1949     | -0.28260844 | 0.08870498 | -2.18494893 |     |
| KCNE3        | 0.28258442  | 0.08871727 | 2.18474714  |     |
| KIAA1881     | -0.28258856 | 0.08871727 | -2.18478191 |     |
| C2orf69      | 0.28252989  | 0.08879996 | 2.18428893  |     |
| SCTR         | -0.28251783 | 0.08880252 | -2.18418767 |     |
| JMJD5        | -0.28251460 | 0.08880252 | -2.18416049 |     |
| BBS12        | 0.28250012  | 0.08881235 | 2.18403881  |     |
| C1orf175     | -0.28249513 | 0.08881235 | -2.18399695 |     |
| JAKMIP1      | -0.28242801 | 0.08891699 | -2.18343301 |     |
| SC5DL        | 0.28241992  | 0.08891905 | 2.18336509  |     |
| NFASC        | -0.28240510 | 0.08893282 | -2.18324055 |     |
| PPPDE1       | 0.28239819  | 0.08893285 | 2.18318247  |     |
| ZNF273       | 0.28232123  | 0.08904850 | 2.18253601  |     |
| HMGCL        | 0.28231789  | 0.08904850 | 2.18250798  |     |
| APC          | 0.28230744  | 0.08905020 | 2.18242015  |     |
| KIF1A        | -0.28230312 | 0.08905020 | -2.18238386 |     |
| LOC100133388 | -0.28228392 | 0.08907147 | -2.18222259 | yes |
| CYP19A1      | -0.28227710 | 0.08907147 | -2.18216530 |     |
| PIGS         | 0.28226247  | 0.08908494 | 2.18204239  |     |
| RRAGB        | 0.28222778  | 0.08908531 | 2.18175100  |     |
| MAGI3        | 0.28223372  | 0.08908531 | 2.18180093  |     |
| SFTPD        | -0.28224831 | 0.08908531 | -2.18192346 |     |
| UGT2B7       | -0.28223807 | 0.08908531 | -2.18183750 |     |
| FZD7         | -0.28224706 | 0.08908531 | -2.18191294 |     |
| LRRC28       | 0.28221378  | 0.08909768 | 2.18163340  |     |
| DRD1         | -0.28219656 | 0.08911565 | -2.18148884 |     |
| ZCCHC13      | -0.28217693 | 0.08912584 | -2.18132391 |     |
| TAS2R1       | -0.28218134 | 0.08912584 | -2.18136098 |     |
| FAM71E1      | -0.28216601 | 0.08913285 | -2.18123221 |     |
| C1orf122     | -0.28213272 | 0.08917882 | -2.18095262 |     |
| ACSL6        | -0.28209771 | 0.08920773 | -2.18065859 |     |
| C6orf15      | -0.28208857 | 0.08920773 | -2.18058185 |     |
| SNORA42      | -0.28209595 | 0.08920773 | -2.18064379 |     |
| SNORD113-3   | -0.28209249 | 0.08920773 | -2.18061472 |     |
| SQLE         | 0.28205795  | 0.08924909 | 2.18032468  |     |
| MYCBP        | 0.28198604  | 0.08936247 | 2.17972075  |     |
| FABP1        | -0.28197769 | 0.08936502 | -2.17965063 |     |
| CALY         | -0.28194736 | 0.08940593 | -2.17939594 |     |
| NR2C2AP      | 0.28185771  | 0.08951437 | 2.17864312  |     |
| CREG2        | -0.28186335 | 0.08951437 | -2.17869051 |     |
| TIA1         | 0.28187118  | 0.08951437 | 2.17875628  |     |
| BTBD6        | -0.28186953 | 0.08951437 | -2.17874244 |     |
| FASTKD3      | 0.28184721  | 0.08952068 | 2.17855500  |     |
| CDK6         | 0.28180630  | 0.08956811 | 2.17821148  |     |
| CASP2        | 0.28180862  | 0.08956811 | 2.17823094  |     |
| MGST1        | 0.28175578  | 0.08964438 | 2.17778735  |     |
| CNBD1        | -0.28171264 | 0.08968373 | -2.17742513 |     |
| LOC728545    | -0.28172243 | 0.08968373 | -2.17750730 |     |

|           |             |            |             |     |
|-----------|-------------|------------|-------------|-----|
| LOC80054  | -0.28171680 | 0.08968373 | -2.17746008 |     |
| SPN       | -0.28166851 | 0.08974891 | -2.17705463 |     |
| LOC257039 | -0.28165280 | 0.08976163 | -2.17692280 |     |
| COPS4     | 0.28164748  | 0.08976163 | 2.17687808  |     |
| C9orf61   | -0.28163843 | 0.08976542 | -2.17680217 |     |
| SPATA5L1  | 0.28161753  | 0.08978996 | 2.17662672  |     |
| ZNF385A   | -0.28160788 | 0.08979481 | -2.17654570 |     |
| CDC2L5    | 0.28152147  | 0.08993415 | 2.17582034  |     |
| EXOC3L    | -0.28150477 | 0.08995137 | -2.17568016 |     |
| LRRTM3    | -0.28148983 | 0.08996027 | -2.17555476 |     |
| PAK1IP1   | 0.28148121  | 0.08996027 | 2.17548235  |     |
| OR52N1    | -0.28147906 | 0.08996027 | -2.17546432 |     |
| RPS27AP17 | -0.28146832 | 0.08996704 | -2.17537418 |     |
| PDSS1     | 0.28141763  | 0.08997156 | 2.17494871  |     |
| ATXN10    | 0.28145135  | 0.08997156 | 2.17523173  |     |
| IL1F7     | -0.28141789 | 0.08997156 | -2.17495091 |     |
| C6orf66   | 0.28144996  | 0.08997156 | 2.17522010  |     |
| LOC440934 | -0.28143035 | 0.08997156 | -2.17505548 |     |
| PPP3CC    | 0.28144416  | 0.08997156 | 2.17517137  |     |
| GLT8D1    | 0.28143567  | 0.08997156 | 2.17510013  |     |
| VSX1      | -0.28138909 | 0.08999750 | -2.17470919 |     |
| PGM2      | 0.28139442  | 0.08999750 | 2.17475394  |     |
| OR5T2     | -0.28136066 | 0.09003532 | -2.17447056 |     |
| C12orf67  | -0.28134432 | 0.09005194 | -2.17433340 |     |
| BSPH1     | -0.28125961 | 0.09018858 | -2.17362251 |     |
| ZFP64     | 0.28123223  | 0.09022461 | 2.17339276  |     |
| LOC440015 | -0.28121945 | 0.09023500 | -2.17328546 |     |
| BBS4      | 0.28120986  | 0.09023978 | 2.17320502  |     |
| MRPL15    | 0.28118067  | 0.09026158 | 2.17296003  |     |
| C1orf110  | 0.28117685  | 0.09026158 | 2.17292801  | yes |
| HIRIP3    | -0.28117993 | 0.09026158 | -2.17295388 |     |
| WIT1      | -0.28116443 | 0.09027135 | -2.17282375 |     |
| TAF5L     | 0.28108480  | 0.09039931 | 2.17215558  | yes |
| NR1I3     | -0.28106497 | 0.09042212 | -2.17198921 |     |
| SNORD73A  | 0.28104452  | 0.09044604 | 2.17181760  |     |
| CPT1A     | 0.28102250  | 0.09044854 | 2.17163287  |     |
| PMPCA     | 0.28102677  | 0.09044854 | 2.17166870  |     |
| GRIA3     | -0.28103585 | 0.09044854 | -2.17174492 |     |
| HBXIP     | 0.28101489  | 0.09044986 | 2.17156901  |     |
| TWSG1     | 0.28094549  | 0.09055999 | 2.17098677  |     |
| SLC7A9    | -0.28089938 | 0.09062915 | -2.17059995 |     |
| DPRX      | -0.28087210 | 0.09066515 | -2.17037110 |     |
| MGAT4A    | 0.28084551  | 0.09068785 | 2.17014800  |     |
| ELF3      | 0.28084960  | 0.09068785 | 2.17018232  |     |
| TRAPPC5   | -0.28081363 | 0.09071988 | -2.16988057 |     |
| PIN1L     | -0.28081591 | 0.09071988 | -2.16989967 |     |
| SNORD36B  | 0.28074583  | 0.09081533 | 2.16931184  |     |
| SERPINB12 | -0.28074801 | 0.09081533 | -2.16933015 |     |
| PTRH2     | 0.28073136  | 0.09082263 | 2.16919050  |     |
| BPHL      | 0.28072797  | 0.09082263 | 2.16916208  |     |

|              |             |            |             |
|--------------|-------------|------------|-------------|
| ZKSCAN2      | -0.28069906 | 0.09086158 | -2.16891957 |
| FAM9B        | -0.28068947 | 0.09086640 | -2.16883912 |
| CYP2C18      | 0.28067852  | 0.09087364 | 2.16874725  |
| COQ6         | 0.28065377  | 0.09090525 | 2.16853968  |
| ABCA5        | 0.28063776  | 0.09092143 | 2.16840536  |
| CCDC91       | 0.28061178  | 0.09094310 | 2.16818752  |
| XRCC3        | -0.28061700 | 0.09094310 | -2.16823125 |
| TMEM188      | 0.28058239  | 0.09098294 | 2.16794100  |
| NAALADL2     | 0.28055378  | 0.09102141 | 2.16770106  |
| TIMM8B       | 0.28054618  | 0.09102273 | 2.16763734  |
| THUMPD1      | 0.28051910  | 0.09105850 | 2.16741026  |
| CHMP7        | 0.28050978  | 0.09106287 | 2.16733203  |
| CHST4        | 0.28047335  | 0.09109146 | 2.16702653  |
| GLA          | 0.28047589  | 0.09109146 | 2.16704783  |
| MAGEB2       | -0.28047307 | 0.09109146 | -2.16702419 |
| FAM40A       | 0.28043696  | 0.09114323 | 2.16672143  |
| ELAVL4       | -0.28042060 | 0.09114795 | -2.16658418 |
| NRL          | -0.28042303 | 0.09114795 | -2.16660454 |
| QRICH1       | 0.28037054  | 0.09122447 | 2.16616442  |
| FAM83B       | 0.28034426  | 0.09125421 | 2.16594410  |
| LHX8         | -0.28033320 | 0.09125421 | -2.16585137 |
| ZNF444       | -0.28033664 | 0.09125421 | -2.16588021 |
| EPN1         | -0.28030742 | 0.09128777 | -2.16563515 |
| TMEM178      | -0.28027613 | 0.09132226 | -2.16537280 |
| DEFB134      | -0.28027427 | 0.09132226 | -2.16535720 |
| NHLH2        | -0.28025151 | 0.09135048 | -2.16516638 |
| LOC100132178 | 0.28022810  | 0.09137985 | 2.16497010  |
| ONECUT1      | -0.28016511 | 0.09146733 | -2.16444198 |
| C16orf13     | -0.28016571 | 0.09146733 | -2.16444702 |
| LOC642864    | -0.28014513 | 0.09149065 | -2.16427447 |
| UBE2W        | 0.28012396  | 0.09151608 | 2.16409702  |
| C1orf182     | -0.28009738 | 0.09152683 | -2.16387417 |
| AURKC        | -0.28010038 | 0.09152683 | -2.16389932 |
| ARHGAP12     | 0.28010775  | 0.09152683 | 2.16396114  |
| EPHA5        | -0.28007753 | 0.09153053 | -2.16370779 |
| DSTYK        | 0.28007477  | 0.09153053 | 2.16368462  |
| SENP6        | 0.28007767  | 0.09153053 | 2.16370899  |
| PLAC1L       | -0.28001538 | 0.09161719 | -2.16318679 |
| BBS10        | 0.28001230  | 0.09161719 | 2.16316101  |
| PPP1R2       | 0.28000385  | 0.09162006 | 2.16309013  |
| ADIPOQ       | -0.27998063 | 0.09164917 | -2.16289550 |
| TAAR8        | -0.27996773 | 0.09165995 | -2.16278736 |
| FBXL4        | 0.27990696  | 0.09174370 | 2.16227800  |
| PNLIPRP2     | -0.27990999 | 0.09174370 | -2.16230340 |
| SNORA71C     | -0.27987194 | 0.09179384 | -2.16198448 |
| TMEM209      | 0.27985497  | 0.09181187 | 2.16184228  |
| EMID2        | -0.27984192 | 0.09182292 | -2.16173294 |
| CFHR5        | -0.27983464 | 0.09182372 | -2.16167188 |
| IP6K2        | 0.27981598  | 0.09184476 | 2.16151552  |
| GPR68        | -0.27980162 | 0.09185816 | -2.16139518 |

|           |             |            |             |     |
|-----------|-------------|------------|-------------|-----|
| CLPX      | 0.27978571  | 0.09186733 | 2.16126182  |     |
| DMXL1     | 0.27978281  | 0.09186733 | 2.16123747  |     |
| CEMP1     | -0.27976645 | 0.09188429 | -2.16110036 |     |
| APLNR     | -0.27973820 | 0.09190782 | -2.16086363 |     |
| SEPP1     | 0.27973858  | 0.09190782 | 2.16086687  |     |
| FKSG83    | -0.27972591 | 0.09190782 | -2.16076067 |     |
| KBTBD7    | 0.27973122  | 0.09190782 | 2.16080516  |     |
| GABRA1    | -0.27971405 | 0.09191660 | -2.16066128 |     |
| ZNF436    | 0.27970732  | 0.09191660 | 2.16060488  |     |
| ISG20L2   | 0.27968971  | 0.09193027 | 2.16045730  |     |
| NUAK1     | -0.27968600 | 0.09193027 | -2.16042616 |     |
| CAPN12    | -0.27966069 | 0.09196318 | -2.16021414 |     |
| TPCN2     | -0.27964281 | 0.09198289 | -2.16006424 |     |
| CLDN14    | -0.27960621 | 0.09203595 | -2.15975756 |     |
| C14orf179 | 0.27958332  | 0.09206458 | 2.15956581  |     |
| LRP3      | -0.27952146 | 0.09216277 | -2.15904744 |     |
| GPR4      | -0.27951356 | 0.09216468 | -2.15898129 |     |
| RAI2      | -0.27947824 | 0.09219461 | -2.15868535 |     |
| PCDHA12   | -0.27947826 | 0.09219461 | -2.15868552 |     |
| LOC644083 | -0.27947632 | 0.09219461 | -2.15866927 |     |
| CRTC1     | -0.27944164 | 0.09224434 | -2.15837873 | yes |
| WHSC1L1   | 0.27932194  | 0.09244610 | 2.15737590  |     |
| BEND3     | -0.27931046 | 0.09245444 | -2.15727969 |     |
| GSK3B     | 0.27929791  | 0.09246467 | 2.15717459  | yes |
| MICAL3    | -0.27922209 | 0.09257939 | -2.15653943 |     |
| C2orf7    | -0.27922018 | 0.09257939 | -2.15652344 |     |
| DUSP10    | 0.27920310  | 0.09259777 | 2.15638037  |     |
| MOSPD2    | 0.27910850  | 0.09275509 | 2.15558806  |     |
| PCDH9     | -0.27909392 | 0.09276900 | -2.15546595 |     |
| GJA8      | -0.27904768 | 0.09283974 | -2.15507867 |     |
| FAM171A2  | -0.27903831 | 0.09284431 | -2.15500018 |     |
| OR3A2     | -0.27902556 | 0.09285496 | -2.15489336 |     |
| LPA       | -0.27897637 | 0.09293103 | -2.15448143 |     |
| CNNM1     | -0.27891387 | 0.09301882 | -2.15395807 |     |
| CTR9      | 0.27891693  | 0.09301882 | 2.15398364  |     |
| TNKS      | 0.27885725  | 0.09310838 | 2.15348388  |     |
| OR52I2    | -0.27882308 | 0.09313304 | -2.15319776 |     |
| GPR142    | -0.27882954 | 0.09313304 | -2.15325187 |     |
| LRP11     | 0.27882724  | 0.09313304 | 2.15323259  |     |
| SPTBN5    | -0.27880616 | 0.09315121 | -2.15305609 |     |
| AK5       | -0.27877781 | 0.09318997 | -2.15281869 |     |
| C8orf74   | -0.27874928 | 0.09320901 | -2.15257986 |     |
| RSPO1     | -0.27874870 | 0.09320901 | -2.15257502 |     |
| TMEM48    | 0.27874677  | 0.09320901 | 2.15255881  |     |
| P11       | -0.27869523 | 0.09328955 | -2.15212732 |     |
| OR2B6     | -0.27865717 | 0.09334585 | -2.15180864 |     |
| BCL9      | -0.27858602 | 0.09346186 | -2.15121301 |     |
| FGF16     | -0.27857178 | 0.09347526 | -2.15109375 |     |
| C18orf26  | -0.27855171 | 0.09349917 | -2.15092575 |     |
| MYADML2   | -0.27853072 | 0.09352475 | -2.15075002 |     |

|           |             |            |             |     |
|-----------|-------------|------------|-------------|-----|
| CCT8L1    | -0.27848749 | 0.09357819 | -2.15038815 |     |
| C7orf46   | 0.27848895  | 0.09357819 | 2.15040037  |     |
| LCAT      | -0.27846587 | 0.09360491 | -2.15020723 |     |
| SPINK2    | -0.27844505 | 0.09363023 | -2.15003289 |     |
| C9orf142  | -0.27842463 | 0.09365480 | -2.14986200 | yes |
| NUDT2     | 0.27841513  | 0.09365965 | 2.14978246  |     |
| NEK1      | 0.27840259  | 0.09367000 | 2.14967752  |     |
| PDC       | -0.27833909 | 0.09377248 | -2.14914605 |     |
| RFX4      | -0.27833090 | 0.09377497 | -2.14907747 |     |
| FCN1      | -0.27831356 | 0.09379401 | -2.14893236 |     |
| VPS8      | 0.27821663  | 0.09395715 | 2.14812114  |     |
| C3orf34   | 0.27820203  | 0.09397126 | 2.14799895  |     |
| RFNG      | -0.27816576 | 0.09402463 | -2.14769544 |     |
| RPL36     | -0.27809133 | 0.09414727 | -2.14707257 |     |
| TAAR1     | -0.27804533 | 0.09418129 | -2.14668763 |     |
| APOF      | -0.27804847 | 0.09418129 | -2.14671390 |     |
| PSAP      | 0.27806110  | 0.09418129 | 2.14681956  |     |
| SHARPIN   | -0.27805498 | 0.09418129 | -2.14676842 |     |
| ARFGEF2   | 0.27803756  | 0.09418302 | 2.14662264  |     |
| ATP10B    | 0.27797822  | 0.09427839 | 2.14612615  |     |
| STXBP5    | 0.27795776  | 0.09430320 | 2.14595489  |     |
| UNC50     | 0.27794488  | 0.09431256 | 2.14584718  |     |
| RDH16     | -0.27793898 | 0.09431256 | -2.14579779 |     |
| PRKD1     | -0.27789586 | 0.09437656 | -2.14543701 |     |
| PHLDA2    | -0.27789014 | 0.09437656 | -2.14538918 |     |
| ZCCHC7    | 0.27785772  | 0.09442312 | 2.14511798  |     |
| MAST3     | -0.27784289 | 0.09442533 | -2.14499389 |     |
| SPI1      | -0.27784291 | 0.09442533 | -2.14499403 |     |
| DOC2A     | -0.27783170 | 0.09443331 | -2.14490023 |     |
| LOC120364 | -0.27778916 | 0.09449829 | -2.14454441 |     |
| COPS5     | 0.27777801  | 0.09450621 | 2.14445109  |     |
| DBP       | -0.27772285 | 0.09455951 | -2.14398970 |     |
| TTPAL     | 0.27772986  | 0.09455951 | 2.14404829  |     |
| NOL4      | -0.27772150 | 0.09455951 | -2.14397834 |     |
| RPL14     | 0.27773822  | 0.09455951 | 2.14411827  |     |
| ANGPTL3   | -0.27771007 | 0.09456490 | -2.14388273 |     |
| UPK2      | -0.27770493 | 0.09456490 | -2.14383975 |     |
| UBE2E1    | 0.27769338  | 0.09457353 | 2.14374315  |     |
| DDHD1     | 0.27767841  | 0.09457603 | 2.14361790  |     |
| SLC10A7   | 0.27767866  | 0.09457603 | 2.14362005  |     |
| ST8SIA3   | -0.27766548 | 0.09458717 | -2.14350982 |     |
| UNQ9419   | -0.27764771 | 0.09460715 | -2.14336115 |     |
| OR52N2    | -0.27759042 | 0.09469911 | -2.14288197 |     |
| EYA1      | 0.27755328  | 0.09475442 | 2.14257128  |     |
| SLC16A10  | -0.27752531 | 0.09477276 | -2.14233740 |     |
| DVL1      | -0.27752415 | 0.09477276 | -2.14232767 |     |
| C18orf8   | 0.27752282  | 0.09477276 | 2.14231655  |     |
| EIF2C3    | 0.27748624  | 0.09478584 | 2.14201065  |     |
| DEFB121   | -0.27748517 | 0.09478584 | -2.14200170 |     |
| ASTL      | -0.27748681 | 0.09478584 | -2.14201536 |     |

|           |             |            |             |     |
|-----------|-------------|------------|-------------|-----|
| MYL7      | -0.27748166 | 0.09478584 | -2.14197231 |     |
| RUVBL1    | 0.27749857  | 0.09478584 | 2.14211371  |     |
| ATCD1     | -0.27744286 | 0.09484045 | -2.14164781 |     |
| RLTPR     | -0.27743812 | 0.09484045 | -2.14160822 |     |
| LRRFIP2   | 0.27742653  | 0.09484921 | 2.14151124  |     |
| ZNF683    | -0.27740908 | 0.09486864 | -2.14136537 |     |
| SNX32     | -0.27734625 | 0.09497093 | -2.14083989 |     |
| TUBB3     | -0.27731907 | 0.09497094 | -2.14061265 |     |
| MRPL35    | 0.27732966  | 0.09497094 | 2.14070119  |     |
| C15orf23  | 0.27733245  | 0.09497094 | 2.14072448  |     |
| LOC90826  | 0.27732187  | 0.09497094 | 2.14063604  |     |
| RTN4RL1   | -0.27729104 | 0.09500517 | -2.14037828 |     |
| MKLN1     | 0.27728285  | 0.09500517 | 2.14030980  |     |
| GAB2      | -0.27727996 | 0.09500517 | -2.14028557 |     |
| WSCD2     | -0.27725660 | 0.09503542 | -2.14009029 |     |
| LHX6      | -0.27723890 | 0.09503942 | -2.13994231 |     |
| CWC22     | 0.27724215  | 0.09503942 | 2.13996944  |     |
| CAMK2B    | -0.27722727 | 0.09503942 | -2.13984500 |     |
| MAPKAPK5  | 0.27723253  | 0.09503942 | 2.13988904  |     |
| SEC24B    | 0.27716442  | 0.09511706 | 2.13931953  |     |
| CLCN3     | 0.27716513  | 0.09511706 | 2.13932543  |     |
| TMEM150   | -0.27716823 | 0.09511706 | -2.13935136 | yes |
| ASPHD1    | -0.27714231 | 0.09514507 | -2.13913465 |     |
| TMEM131   | 0.27712344  | 0.09515476 | 2.13897691  | yes |
| C14orf169 | -0.27712580 | 0.09515476 | -2.13899665 |     |
| IGF1R     | 0.27708862  | 0.09520604 | 2.13868578  |     |
| DSCAML1   | -0.27705991 | 0.09523593 | -2.13844580 |     |
| RPS16     | 0.27705871  | 0.09523593 | 2.13843574  |     |
| SSTR1     | -0.27701359 | 0.09530608 | -2.13805855 |     |
| CCT4      | 0.27697509  | 0.09535174 | 2.13773670  |     |
| KIAA1797  | 0.27697859  | 0.09535174 | 2.13776596  |     |
| TRIM72    | -0.27696653 | 0.09535499 | -2.13766518 |     |
| FRYL      | 0.27694654  | 0.09537918 | 2.13749807  |     |
| CCDC144NL | -0.27693660 | 0.09538498 | -2.13741494 |     |
| GIP       | -0.27691484 | 0.09541242 | -2.13723305 |     |
| MPZL3     | 0.27690360  | 0.09541369 | 2.13713914  |     |
| WAPAL     | 0.27690059  | 0.09541369 | 2.13711392  |     |
| SLC30A10  | -0.27688607 | 0.09542787 | -2.13699258 |     |
| ELF2      | 0.27686947  | 0.09544586 | 2.13685384  |     |
| MARK4     | -0.27684515 | 0.09547801 | -2.13665055 |     |
| GPR120    | -0.27681779 | 0.09549091 | -2.13642187 |     |
| LMBRD1    | 0.27681874  | 0.09549091 | 2.13642976  |     |
| GPBP1     | 0.27682648  | 0.09549091 | 2.13649445  |     |
| C14orf102 | 0.27677922  | 0.09554921 | 2.13609946  |     |
| MT1IP     | -0.27676039 | 0.09555888 | -2.13594213 |     |
| PCDH20    | 0.27676242  | 0.09555888 | 2.13595904  |     |
| SYNE2     | 0.27674396  | 0.09556614 | 2.13580481  |     |
| LOC389199 | -0.27674289 | 0.09556614 | -2.13579586 |     |
| ARID3C    | -0.27671887 | 0.09559777 | -2.13559512 |     |
| UPB1      | -0.27668844 | 0.09560344 | -2.13534075 |     |

|           |             |            |             |     |
|-----------|-------------|------------|-------------|-----|
| GOLPH3L   | 0.27669416  | 0.09560344 | 2.13538857  | yes |
| YWHAH     | 0.27669090  | 0.09560344 | 2.13536132  |     |
| PRAC      | -0.27668194 | 0.09560344 | -2.13528647 |     |
| CTSF      | -0.27670067 | 0.09560344 | -2.13544296 |     |
| SELM      | -0.27667448 | 0.09560471 | -2.13522410 | yes |
| TRUB2     | 0.27665915  | 0.09562042 | 2.13509597  |     |
| ZNF383    | 0.27661926  | 0.09563785 | 2.13476264  |     |
| NSMCE2    | 0.27662789  | 0.09563785 | 2.13483474  |     |
| HABP2     | -0.27662963 | 0.09563785 | -2.13484928 |     |
| RPS6KB1   | 0.27660906  | 0.09563785 | 2.13467744  |     |
| C16orf57  | -0.27660908 | 0.09563785 | -2.13467759 |     |
| SNAP23    | 0.27661927  | 0.09563785 | 2.13476273  |     |
| CSTB      | 0.27655558  | 0.09571117 | 2.13423053  | yes |
| PTRF      | -0.27656165 | 0.09571117 | -2.13428124 | yes |
| KCNH5     | -0.27643845 | 0.09591393 | -2.13325173 |     |
| TUBB4     | -0.27639279 | 0.09598546 | -2.13287026 |     |
| GPATCH2   | 0.27637766  | 0.09600084 | 2.13274387  |     |
| ZNF227    | 0.27636216  | 0.09601693 | 2.13261434  |     |
| ARHGAP5   | 0.27633748  | 0.09603745 | 2.13240819  |     |
| SGK1      | 0.27634418  | 0.09603745 | 2.13246413  |     |
| CRTAC1    | -0.27631775 | 0.09604888 | -2.13224335 |     |
| ATCAY     | -0.27631877 | 0.09604888 | -2.13225182 |     |
| HDGF2     | -0.27629801 | 0.09607278 | -2.13207839 |     |
| C1orf147  | -0.27623918 | 0.09616678 | -2.13158693 |     |
| DLGAP1    | -0.27623345 | 0.09616678 | -2.13153903 |     |
| ATP5C1    | 0.27618530  | 0.09624305 | 2.13113681  |     |
| LOC399744 | -0.27617174 | 0.09625558 | -2.13102358 |     |
| TLE2      | -0.27611949 | 0.09633947 | -2.13058714 |     |
| MAP3K14   | -0.27611082 | 0.09634300 | -2.13051468 |     |
| SMNDC1    | 0.27608311  | 0.09638166 | 2.13028320  |     |
| RNF19B    | 0.27601638  | 0.09649238 | 2.12972586  |     |
| SPG20     | 0.27599824  | 0.09651341 | 2.12957433  |     |
| SPRR2F    | -0.27598804 | 0.09651976 | -2.12948919 |     |
| TRDN      | -0.27595937 | 0.09654013 | -2.12924971 |     |
| UBLCP1    | 0.27596714  | 0.09654013 | 2.12931462  |     |
| HSPA5     | 0.27595675  | 0.09654013 | 2.12922783  |     |
| SPHK2     | -0.27594931 | 0.09654139 | -2.12916571 |     |
| PRMT3     | 0.27590154  | 0.09660470 | 2.12876677  |     |
| BOP1      | -0.27590539 | 0.09660470 | -2.12879890 |     |
| PPIF      | 0.27588787  | 0.09661750 | 2.12865256  |     |
| RSBN1L    | 0.27586655  | 0.09664442 | 2.12847457  |     |
| TCTEX1D1  | 0.27585604  | 0.09665137 | 2.12838680  |     |
| ALOX15    | 0.27583865  | 0.09666885 | 2.12824156  |     |
| HOXA7     | -0.27582634 | 0.09666885 | -2.12813871 |     |
| ZNF502    | 0.27583254  | 0.09666885 | 2.12819054  |     |
| IL17A     | -0.27578448 | 0.09673379 | -2.12778917 |     |
| MYCL1     | -0.27576631 | 0.09675493 | -2.12763742 |     |
| ASB5      | -0.27573712 | 0.09679645 | -2.12739370 |     |
| CSMD3     | -0.27569161 | 0.09679850 | -2.12701368 |     |
| SAMD8     | 0.27569005  | 0.09679850 | 2.12700066  |     |



|              |             |            |             |     |
|--------------|-------------|------------|-------------|-----|
| IFT81        | 0.27569548  | 0.09679850 | 2.12704604  |     |
| C16orf80     | 0.27569212  | 0.09679850 | 2.12701795  |     |
| CD300E       | -0.27570099 | 0.09679850 | -2.12709202 |     |
| SPEM1        | -0.27568878 | 0.09679850 | -2.12699010 |     |
| OR6K3        | -0.27568977 | 0.09679850 | -2.12699835 |     |
| C7orf63      | 0.27568182  | 0.09679891 | 2.12693194  |     |
| LOC100129737 | -0.27567048 | 0.09680741 | -2.12683728 |     |
| SFTA2        | -0.27564697 | 0.09683845 | -2.12664100 |     |
| FUT5         | -0.27563413 | 0.09684975 | -2.12653376 |     |
| USP30        | 0.27561926  | 0.09686480 | 2.12640957  |     |
| SPACA4       | -0.27556193 | 0.09695733 | -2.12593094 |     |
| NBL1         | -0.27555582 | 0.09695733 | -2.12587995 |     |
| SPIN3        | -0.27553807 | 0.09696525 | -2.12573174 |     |
| HS3ST5       | -0.27554146 | 0.09696525 | -2.12576007 |     |
| PREP         | 0.27550610  | 0.09701202 | 2.12546483  |     |
| TDRKH        | -0.27542902 | 0.09713094 | -2.12482136 |     |
| ERMAP        | -0.27542850 | 0.09713094 | -2.12481703 |     |
| ANKS4B       | -0.27540052 | 0.09717035 | -2.12458350 |     |
| ZNF706       | 0.27537788  | 0.09719988 | 2.12439448  |     |
| FAM178A      | 0.27534505  | 0.09724231 | 2.12412041  |     |
| ADIPOR2      | 0.27534155  | 0.09724231 | 2.12409124  |     |
| C20orf186    | -0.27529600 | 0.09727686 | -2.12371102 |     |
| VPS53        | 0.27529803  | 0.09727686 | 2.12372793  |     |
| PSME1        | 0.27531469  | 0.09727686 | 2.12386705  |     |
| TMOD1        | -0.27530658 | 0.09727686 | -2.12379935 |     |
| MVP          | 0.27521977  | 0.09740602 | 2.12307477  |     |
| FAM46B       | -0.27521129 | 0.09740927 | -2.12300397 |     |
| OR1L8        | -0.27518251 | 0.09743775 | -2.12276375 |     |
| LOC387745    | -0.27518820 | 0.09743775 | -2.12281128 |     |
| POLB         | 0.27516303  | 0.09746146 | 2.12260116  |     |
| GPR31        | -0.27514754 | 0.09747456 | -2.12247192 |     |
| OAZ3         | -0.27513578 | 0.09747456 | -2.12237379 |     |
| AMAC1L3      | -0.27513952 | 0.09747456 | -2.12240495 |     |
| MYLK         | -0.27510358 | 0.09752196 | -2.12210502 |     |
| TAF1C        | -0.27508999 | 0.09753472 | -2.12199162 |     |
| DBN1         | -0.27507497 | 0.09755015 | -2.12186628 | yes |
| C4orf36      | 0.27505762  | 0.09756992 | 2.12172145  |     |
| WDR5         | -0.27502451 | 0.09760441 | -2.12144515 |     |
| HPN          | -0.27502700 | 0.09760441 | -2.12146596 |     |
| MDC1         | -0.27501891 | 0.09760441 | -2.12139842 |     |
| MIA2         | -0.27498578 | 0.09762850 | -2.12112203 |     |
| ABC5         | -0.27499459 | 0.09762850 | -2.12119555 |     |
| C9           | -0.27498589 | 0.09762850 | -2.12112294 |     |
| BYSL         | 0.27494433  | 0.09769320 | 2.12077612  |     |
| FAM171B      | -0.27491859 | 0.09772863 | -2.12056134 |     |
| KCNRG        | 0.27489416  | 0.09776163 | 2.12035752  |     |
| LOC645805    | 0.27487187  | 0.09779064 | 2.12017155  |     |
| DLK2         | -0.27484281 | 0.09783231 | -2.11992903 | yes |
| SOX12        | -0.27483015 | 0.09784337 | -2.11982347 |     |
| CCDC80       | 0.27470467  | 0.09805256 | 2.11877654  |     |

|           |             |            |             |
|-----------|-------------|------------|-------------|
| ZNF695    | -0.27470697 | 0.09805256 | -2.11879571 |
| CSF3R     | -0.27466971 | 0.09810532 | -2.11848492 |
| KCTD16    | -0.27461722 | 0.09818216 | -2.11804703 |
| SNAP29    | 0.27461517  | 0.09818216 | 2.11802996  |
| EFCAB7    | 0.27459456  | 0.09820814 | 2.11785799  |
| C1orf151  | 0.27457909  | 0.09822451 | 2.11772895  |
| POFUT1    | 0.27455780  | 0.09825176 | 2.11755140  |
| PIWIL3    | -0.27448782 | 0.09836734 | -2.11696766 |
| ESAM      | -0.27448263 | 0.09836734 | -2.11692435 |
| CLIC6     | 0.27446291  | 0.09839169 | 2.11675986  |
| RRP7B     | -0.27443215 | 0.09843673 | -2.11650335 |
| CECR2     | -0.27441333 | 0.09845699 | -2.11634637 |
| LIN7A     | -0.27440789 | 0.09845699 | -2.11630103 |
| KIF4B     | -0.27433487 | 0.09858135 | -2.11569201 |
| LYNX1     | -0.27431804 | 0.09860031 | -2.11555167 |
| SCLT1     | 0.27430425  | 0.09861359 | 2.11543662  |
| LOC145757 | -0.27427587 | 0.09865423 | -2.11520003 |
| LOC646891 | -0.27426020 | 0.09865841 | -2.11506933 |
| ZNF623    | 0.27426368  | 0.09865841 | 2.11509832  |
| LOC146429 | -0.27425054 | 0.09866393 | -2.11498879 |
| CHRNA2    | -0.27423703 | 0.09867669 | -2.11487606 |
| NBPF10    | 0.27422125  | 0.09869369 | 2.11474453  |
| STAG1     | 0.27418903  | 0.09872619 | 2.11447586  |
| SHANK2    | -0.27419201 | 0.09872619 | -2.11450068 |
| ADAM21    | -0.27418380 | 0.09872619 | -2.11443218 |
| RAB38     | 0.27416848  | 0.09872972 | 2.11430448  |
| SMYD2     | 0.27417045  | 0.09872972 | 2.11432088  |
| IDUA      | -0.27414982 | 0.09875216 | -2.11414889 |
| CECR4     | -0.27412054 | 0.09879455 | -2.11390477 |
| RBM12     | 0.27410234  | 0.09881614 | 2.11375301  |
| ROR2      | -0.27408656 | 0.09883319 | -2.11362139 |
| PTPN13    | 0.27407290  | 0.09884624 | 2.11350752  |
| SLC38A9   | 0.27406369  | 0.09885094 | 2.11343071  |
| C7orf23   | 0.27403367  | 0.09889476 | 2.11318043  |
| TNPO1     | 0.27396091  | 0.09901903 | 2.11257384  |
| TMEM219   | -0.27394180 | 0.09903608 | -2.11241448 |
| FAM20C    | -0.27393843 | 0.09903608 | -2.11238637 |
| NLRP5     | -0.27392193 | 0.09905450 | -2.11224886 |
| OR52A4    | -0.27390175 | 0.09907987 | -2.11208061 |
| GPR126    | -0.27388254 | 0.09910341 | -2.11192046 |
| DYDC1     | 0.27385174  | 0.09914880 | 2.11166370  |
| MRGPRX2   | -0.27382234 | 0.09919138 | -2.11141859 |
| LSM3      | 0.27381443  | 0.09919138 | 2.11135269  |
| RPL35P1   | -0.27380901 | 0.09919138 | -2.11130751 |
| TDRD5     | -0.27377794 | 0.09923730 | -2.11104855 |
| SEMA3C    | 0.27376041  | 0.09924507 | 2.11090238  |
| C1orf83   | 0.27376241  | 0.09924507 | 2.11091908  |
| RPL18AP6  | -0.27374541 | 0.09926069 | -2.11077739 |
| MTM1      | 0.27373791  | 0.09926220 | 2.11071483  |
| SPINK4    | -0.27372150 | 0.09926704 | -2.11057809 |

|              |             |            |             |
|--------------|-------------|------------|-------------|
| C9orf156     | 0.27372673  | 0.09926704 | 2.11062164  |
| CREBZF       | 0.27371522  | 0.09926704 | 2.11052573  |
| IFT74        | 0.27369344  | 0.09929547 | 2.11034419  |
| STX18        | 0.27366748  | 0.09933179 | 2.11012784  |
| MOBK12C      | -0.27365323 | 0.09934604 | -2.11000901 |
| ADAM20       | 0.27355955  | 0.09951026 | 2.10922826  |
| LOC100133337 | 0.27350444  | 0.09958474 | 2.10876898  |
| C21orf84     | -0.27350733 | 0.09958474 | -2.10879307 |
| ICOSLG       | -0.27349250 | 0.09958474 | -2.10866950 |
| LOC348840    | -0.27347992 | 0.09958474 | -2.10856467 |
| EIF3E        | 0.27349427  | 0.09958474 | 2.10868427  |
| LPXN         | 0.27348527  | 0.09958474 | 2.10860926  |
| CLNS1A       | 0.27344905  | 0.09961776 | 2.10830741  |
| WIZ          | -0.27345341 | 0.09961776 | -2.10834378 |
| THEM5        | -0.27331274 | 0.09986306 | -2.10717162 |
| SCARA3       | -0.27328366 | 0.09987526 | -2.10692927 |
| EXOSC4       | -0.27327950 | 0.09987526 | -2.10689462 |
| ZNF143       | 0.27329354  | 0.09987526 | 2.10701161  |
| ALG2         | 0.27328626  | 0.09987526 | 2.10695098  |
| C10orf31     | -0.27327086 | 0.09987893 | -2.10682266 |
| LEAP2        | -0.27319296 | 0.10000998 | -2.10617364 |
| BMP2         | -0.27318832 | 0.10000998 | -2.10613501 |
| SLC35D2      | 0.27315229  | 0.10001481 | 2.10583480  |
| OR4N5        | -0.27317383 | 0.10001481 | -2.10601427 |
| MRE11A       | 0.27315416  | 0.10001481 | 2.10585037  |
| PRPH         | -0.27315489 | 0.10001481 | -2.10585643 |
| NR1I2        | -0.27316035 | 0.10001481 | -2.10590196 |
| PALM         | -0.27312032 | 0.10006275 | -2.10556846 |
| DNAJA1       | 0.27305854  | 0.10016728 | 2.10505385  |
| CRY1         | 0.27303414  | 0.10020090 | 2.10485059  |
| C11orf85     | -0.27294842 | 0.10035108 | -2.10413655 |
| HADH         | 0.27288103  | 0.10045380 | 2.10357520  |
| MLLT10       | 0.27288378  | 0.10045380 | 2.10359811  |
| FCHSD2       | 0.27280290  | 0.10058982 | 2.10292446  |
| CYP4V2       | 0.27276959  | 0.10064052 | 2.10264709  |
| SLC22A14     | -0.27276213 | 0.10064197 | -2.10258497 |
| DDB1         | 0.27275457  | 0.10064361 | 2.10252201  |
| HSP90AA1     | 0.27274007  | 0.10065849 | 2.10240122  |
| CHCHD2       | 0.27270821  | 0.10070645 | 2.10213594  |
| NUDT17       | -0.27269820 | 0.10071279 | -2.10205252 |
| FOXO4        | -0.27268361 | 0.10072489 | -2.10193103 |
| DMRTA2       | -0.27267846 | 0.10072489 | -2.10188815 |
| SLC37A2      | -0.27267008 | 0.10072811 | -2.10181838 |
| ACTRT1       | -0.27266222 | 0.10073034 | -2.10175289 |
| PLAGL2       | 0.27263620  | 0.10074441 | 2.10153626  |
| BTD          | 0.27263476  | 0.10074441 | 2.10152429  |
| CBLN1        | -0.27264634 | 0.10074441 | -2.10162066 |
| NKIRAS1      | 0.27261092  | 0.10077713 | 2.10132571  |
| CDK5R1       | -0.27259229 | 0.10079989 | -2.10117064 |
| NET1         | 0.27251347  | 0.10090555 | 2.10051430  |

|             |             |            |             |
|-------------|-------------|------------|-------------|
| OR5D13      | -0.27251018 | 0.10090555 | -2.10048690 |
| NOL8        | 0.27252665  | 0.10090555 | 2.10062409  |
| ACTG2       | -0.27251729 | 0.10090555 | -2.10054613 |
| PIM2        | 0.27245989  | 0.10094683 | 2.10006820  |
| OR5M9       | -0.27245512 | 0.10094683 | -2.10002853 |
| KLHL8       | 0.27247378  | 0.10094683 | 2.10018382  |
| SNX6        | 0.27247982  | 0.10094683 | 2.10023412  |
| RFX1        | -0.27245724 | 0.10094683 | -2.10004611 |
| ZNF621      | 0.27244811  | 0.10094746 | 2.09997009  |
| TNFSF13     | -0.27243809 | 0.10095382 | -2.09988672 |
| SPANXN1     | -0.27242176 | 0.10095948 | -2.09975076 |
| hCG_1983896 | -0.27242546 | 0.10095948 | -2.09978158 |
| KRTAP5-10   | -0.27239526 | 0.10099732 | -2.09953016 |
| CLDN10      | 0.27237277  | 0.10102753 | 2.09934289  |
| CLN8        | 0.27233030  | 0.10109593 | 2.09898931  |
| PCDHB9      | -0.27231783 | 0.10110700 | -2.09888548 |
| FFAR1       | -0.27230541 | 0.10111797 | -2.09878212 |
| LEFTY1      | -0.27227121 | 0.10116594 | -2.09849744 |
| SERPINF1    | 0.27226697  | 0.10116594 | 2.09846208  |
| CCBL2       | 0.27225273  | 0.10117118 | 2.09834361  |
| RNASE2      | -0.27225087 | 0.10117118 | -2.09832806 |
| TTC27       | 0.27219214  | 0.10127076 | 2.09783922  |
| MAGEB4      | -0.27218303 | 0.10127541 | -2.09776339 |
| KCNQ3       | -0.27217355 | 0.10128078 | -2.09768448 |
| hCG_2019139 | -0.27215493 | 0.10130364 | -2.09752950 |
| C2orf30     | 0.27211167  | 0.10137369 | 2.09716945  |
| NUP93       | 0.27208879  | 0.10140474 | 2.09697894  |
| CCDC132     | 0.27206786  | 0.10140646 | 2.09680480  |
| CARD18      | -0.27206822 | 0.10140646 | -2.09680779 |
| TAF1D       | 0.27207008  | 0.10140646 | 2.09682328  |
| OPN1LW      | -0.27202898 | 0.10146818 | -2.09648118 |
| C1orf131    | 0.27198823  | 0.10150630 | 2.09614203  |
| NEU2        | -0.27197508 | 0.10150630 | -2.09603264 |
| SCYL3       | 0.27196905  | 0.10150630 | 2.09598243  |
| SNORA9      | -0.27200084 | 0.10150630 | -2.09624695 |
| CSRNP3      | -0.27198431 | 0.10150630 | -2.09610939 |
| SETDB2      | 0.27197591  | 0.10150630 | 2.09603953  |
| DNA2        | 0.27195106  | 0.10152800 | 2.09583271  |
| PIK3R4      | 0.27189571  | 0.10161503 | 2.09537206  |
| PPBP        | -0.27189235 | 0.10161503 | -2.09534409 |
| PDF         | -0.27186835 | 0.10164827 | -2.09514441 |
| PNLIPRP3    | -0.27184673 | 0.10167698 | -2.09496446 |
| SIRT5       | 0.27182421  | 0.10170665 | 2.09477708  |
| PIP5K1A     | 0.27181158  | 0.10170665 | 2.09467204  |
| C9orf64     | 0.27181126  | 0.10170665 | 2.09466936  |
| C3orf58     | 0.27176297  | 0.10178658 | 2.09426755  |
| SNORD26     | 0.27169817  | 0.10189831 | 2.09372838  |
| HS1BP3      | -0.27165371 | 0.10197101 | -2.09335842 |
| WDFY2       | 0.27163077  | 0.10199419 | 2.09316755  |
| MYH6        | -0.27162832 | 0.10199419 | -2.09314721 |

|           |             |            |             |     |
|-----------|-------------|------------|-------------|-----|
| CXorf61   | -0.27161955 | 0.10199823 | -2.09307427 |     |
| UBXN2A    | 0.27159845  | 0.10202296 | 2.09289873  |     |
| PPP2R2D   | 0.27159337  | 0.10202296 | 2.09285642  |     |
| OR56A3    | -0.27156009 | 0.10207418 | -2.09257959 |     |
| UCN       | -0.27153612 | 0.10209466 | -2.09238017 |     |
| KIAA0317  | 0.27153943  | 0.10209466 | 2.09240770  | yes |
| DYNC1I2   | 0.27152100  | 0.10211094 | 2.09225439  |     |
| STYK1     | 0.27149633  | 0.10214562 | 2.09204917  |     |
| CRYGC     | -0.27144662 | 0.10220289 | -2.09163558 |     |
| IRF2BP2   | -0.27145328 | 0.10220289 | -2.09169102 |     |
| SDK2      | -0.27144760 | 0.10220289 | -2.09164377 |     |
| GRID1     | -0.27139518 | 0.10228919 | -2.09120774 |     |
| VAV3      | 0.27138642  | 0.10229324 | 2.09113484  |     |
| RPLP1P3   | -0.27137685 | 0.10229885 | -2.09105523 |     |
| NUDCD1    | 0.27135124  | 0.10233539 | 2.09084221  |     |
| SKIV2L2   | 0.27131855  | 0.10237275 | 2.09057033  |     |
| MYOG      | -0.27131920 | 0.10237275 | -2.09057573 |     |
| KRT8      | 0.27130115  | 0.10239346 | 2.09042563  |     |
| ARL10     | -0.27125999 | 0.10246005 | -2.09008329 | yes |
| ISM2      | -0.27124068 | 0.10248448 | -2.08992268 |     |
| TACR1     | -0.27122653 | 0.10249895 | -2.08980497 |     |
| PARP14    | 0.27120784  | 0.10252217 | 2.08964956  |     |
| HEATR7B2  | -0.27119591 | 0.10253236 | -2.08955033 |     |
| TRIM4     | 0.27118205  | 0.10254628 | 2.08943503  |     |
| RRAGD     | 0.27115505  | 0.10257271 | 2.08921051  |     |
| GGCT      | 0.27115940  | 0.10257271 | 2.08924667  |     |
| KLHL2     | 0.27112272  | 0.10258618 | 2.08894168  |     |
| ARSH      | -0.27114005 | 0.10258618 | -2.08908579 |     |
| KLRC3     | 0.27109908  | 0.10258618 | 2.08874503  |     |
| FLJ43692  | 0.27108819  | 0.10258618 | 2.08865451  |     |
| HPCAL4    | -0.27111743 | 0.10258618 | -2.08889766 |     |
| FAM110A   | -0.27110368 | 0.10258618 | -2.08878335 |     |
| BRMS1L    | 0.27112304  | 0.10258618 | 2.08894435  |     |
| SGCE      | -0.27109297 | 0.10258618 | -2.08869429 |     |
| RG9MTD2   | 0.27108998  | 0.10258618 | 2.08866937  |     |
| MKRN1     | 0.27107038  | 0.10260774 | 2.08850638  |     |
| ADA       | -0.27105756 | 0.10260834 | -2.08839979 |     |
| NIPBL     | 0.27103682  | 0.10260834 | 2.08822736  |     |
| ANAPC4    | 0.27104961  | 0.10260834 | 2.08833366  |     |
| WDR59     | 0.27103889  | 0.10260834 | 2.08824458  |     |
| KRTAP4-12 | -0.27103800 | 0.10260834 | -2.08823714 |     |
| STX6      | 0.27100363  | 0.10264680 | 2.08795132  |     |
| SFRS6     | 0.27100661  | 0.10264680 | 2.08797610  |     |
| SUV420H2  | -0.27096245 | 0.10271354 | -2.08760895 |     |
| PNLIP     | -0.27094842 | 0.10271848 | -2.08749227 |     |
| TMEM126A  | 0.27094661  | 0.10271848 | 2.08747719  |     |
| SUGT1     | 0.27091507  | 0.10276186 | 2.08721501  |     |
| C6orf195  | -0.27090091 | 0.10276186 | -2.08709723 |     |
| OTUD1     | 0.27089760  | 0.10276186 | 2.08706973  |     |
| SOD1      | 0.27089788  | 0.10276186 | 2.08707208  | yes |

|              |             |            |             |     |
|--------------|-------------|------------|-------------|-----|
| KIF16B       | 0.27087583  | 0.10277828 | 2.08688869  |     |
| FIGNL1       | 0.27088189  | 0.10277828 | 2.08693915  |     |
| BOK          | -0.27086739 | 0.10278174 | -2.08681858 |     |
| GPR179       | -0.27085657 | 0.10278983 | -2.08672861 |     |
| ALPP         | -0.27083688 | 0.10281507 | -2.08656492 |     |
| LOC440957    | 0.27082260  | 0.10281701 | 2.08644618  |     |
| SOX13        | -0.27082626 | 0.10281701 | -2.08647660 |     |
| RP11-345P4.4 | 0.27079805  | 0.10285166 | 2.08624209  |     |
| PXT1         | -0.27077420 | 0.10288498 | -2.08604377 |     |
| ZNF576       | -0.27076437 | 0.10289115 | -2.08596208 |     |
| NT5C3L       | -0.27074162 | 0.10292235 | -2.08577292 |     |
| NLRP3        | -0.27072734 | 0.10293715 | -2.08565419 |     |
| ANKAR        | 0.27071437  | 0.10294940 | 2.08554642  |     |
| UTP11L       | 0.27068990  | 0.10297635 | 2.08534295  |     |
| TBX4         | -0.27068719 | 0.10297635 | -2.08532043 |     |
| SMUG1        | 0.27066995  | 0.10297881 | 2.08517710  |     |
| AKIRIN2      | 0.27066601  | 0.10297881 | 2.08514440  |     |
| UCK2         | 0.27067435  | 0.10297881 | 2.08521372  |     |
| BIRC2        | 0.27065477  | 0.10298774 | 2.08505093  |     |
| IFNA5        | -0.27061888 | 0.10304442 | -2.08475260 |     |
| MPP7         | 0.27056564  | 0.10309619 | 2.08431006  |     |
| MYH3         | -0.27056887 | 0.10309619 | -2.08433690 |     |
| ADIPOR1      | 0.27057793  | 0.10309619 | 2.08441225  | yes |
| VTCN1        | 0.27058257  | 0.10309619 | 2.08445077  |     |
| SNORA58      | -0.27055335 | 0.10310715 | -2.08420791 |     |
| SLFN12       | 0.27053661  | 0.10312675 | 2.08406877  |     |
| RFC5         | 0.27048925  | 0.10319787 | 2.08367512  |     |
| TFDP2        | 0.27048668  | 0.10319787 | 2.08365374  |     |
| TEX15        | -0.27047593 | 0.10320586 | -2.08356441 |     |
| ITIH5L       | -0.27046782 | 0.10320872 | -2.08349705 |     |
| PTX3         | -0.27042618 | 0.10327665 | -2.08315096 |     |
| DDX60        | 0.27035118  | 0.10340399 | 2.08252761  |     |
| LOC729974    | -0.27034734 | 0.10340399 | -2.08249574 |     |
| RAB21        | 0.27033856  | 0.10340818 | 2.08242274  |     |
| C8orf12      | -0.27032715 | 0.10341747 | -2.08232795 |     |
| ATP6V1E1     | 0.27031862  | 0.10341787 | 2.08225703  |     |
| DGAT2        | -0.27031369 | 0.10341787 | -2.08221608 |     |
| IL10RB       | 0.27029608  | 0.10342634 | 2.08206975  |     |
| TRPM7        | 0.27029805  | 0.10342634 | 2.08208610  |     |
| GNG12        | 0.27026586  | 0.10347218 | 2.08181865  |     |
| THEM2        | 0.27025909  | 0.10347248 | 2.08176232  |     |
| KIAA1467     | 0.27024945  | 0.10347834 | 2.08168224  |     |
| MS4A8B       | 0.27020711  | 0.10354777 | 2.08133041  |     |
| DPPA2        | -0.27019666 | 0.10355521 | -2.08124360 |     |
| PRKAA2       | 0.27018950  | 0.10355625 | 2.08118411  |     |
| AGTPBP1      | 0.27014449  | 0.10363093 | 2.08081007  |     |
| LOC441242    | 0.27012113  | 0.10366348 | 2.08061605  |     |
| PHF6         | 0.27010989  | 0.10367248 | 2.08052261  |     |
| CLEC12B      | -0.27009713 | 0.10368441 | -2.08041664 |     |
| FBXW7        | 0.27006341  | 0.10373717 | 2.08013645  |     |

|              |             |            |             |
|--------------|-------------|------------|-------------|
| ZNF510       | 0.26998184  | 0.10388318 | 2.07945876  |
| OR5T1        | -0.26996139 | 0.10391014 | -2.07928885 |
| C6orf146     | -0.26993109 | 0.10395631 | -2.07903712 |
| FLJ45455     | -0.26991653 | 0.10397179 | -2.07891618 |
| MRPL14       | 0.26985766  | 0.10407375 | 2.07842711  |
| TRAIP        | -0.26984376 | 0.10408795 | -2.07831167 |
| BMPR1B       | 0.26982951  | 0.10410285 | 2.07819330  |
| OSTC         | 0.26980474  | 0.10413828 | 2.07798756  |
| ARHGFE3      | 0.26979565  | 0.10414311 | 2.07791207  |
| SNORD74      | 0.26974524  | 0.10422095 | 2.07749330  |
| PIGB         | 0.26974256  | 0.10422095 | 2.07747112  |
| ECM1         | -0.26972734 | 0.10422484 | -2.07734465 |
| GSTM5        | -0.26972932 | 0.10422484 | -2.07736110 |
| CBX5         | 0.26970322  | 0.10424157 | 2.07714434  |
| LOC390424    | -0.26969447 | 0.10424157 | -2.07707163 |
| ATP1A2       | -0.26969231 | 0.10424157 | -2.07705375 |
| SKIL         | 0.26969489  | 0.10424157 | 2.07707515  |
| BCO2         | 0.26968545  | 0.10424206 | 2.07699676  |
| KIF2A        | 0.26967579  | 0.10424801 | 2.07691651  |
| ERBB4        | -0.26964207 | 0.10426223 | -2.07663642 |
| OR5A2        | -0.26965402 | 0.10426223 | -2.07673567 |
| LOC338797    | -0.26966136 | 0.10426223 | -2.07679663 |
| TNFSF8       | -0.26964530 | 0.10426223 | -2.07666330 |
| THYN1        | 0.26960157  | 0.10430262 | 2.07630012  |
| SCARNA8      | -0.26961001 | 0.10430262 | -2.07637016 |
| OGT          | 0.26960421  | 0.10430262 | 2.07632200  |
| SLC7A14      | -0.26959492 | 0.10430271 | -2.07624486 |
| OR4C16       | -0.26958283 | 0.10430664 | -2.07614441 |
| TMEM145      | -0.26957969 | 0.10430664 | -2.07611839 |
| TOPBP1       | 0.26951857  | 0.10437544 | 2.07561075  |
| REEP3        | 0.26951808  | 0.10437544 | 2.07560670  |
| PCDHB8       | 0.26952106  | 0.10437544 | 2.07563145  |
| PLA2G10      | 0.26952418  | 0.10437544 | 2.07565739  |
| RASA2        | 0.26950676  | 0.10438466 | 2.07551269  |
| MCM10        | -0.26948696 | 0.10441046 | -2.07534828 |
| INTS8        | 0.26943908  | 0.10449121 | 2.07495073  |
| USP4         | 0.26942988  | 0.10449630 | 2.07487428  |
| LOC100129345 | -0.26939099 | 0.10453422 | -2.07455134 |
| C1orf223     | -0.26939070 | 0.10453422 | -2.07454893 |
| GPR153       | -0.26940329 | 0.10453422 | -2.07465350 |
| TUBGCP4      | 0.26937729  | 0.10453461 | 2.07443763  |
| COPS7A       | 0.26938309  | 0.10453461 | 2.07448578  |
| C7orf59      | -0.26929056 | 0.10469156 | -2.07371750 |
| ZNF785       | -0.26927739 | 0.10470443 | -2.07360813 |
| ACTN1        | -0.26924854 | 0.10474805 | -2.07336860 |
| ZNF280B      | -0.26921989 | 0.10474863 | -2.07313077 |
| CCRL1        | -0.26922127 | 0.10474863 | -2.07314221 |
| C4orf43      | 0.26922932  | 0.10474863 | 2.07320907  |
| LRRC40       | 0.26923898  | 0.10474863 | 2.07328921  |
| LATS1        | 0.26921524  | 0.10474863 | 2.07309218  |

|              |             |            |             |     |
|--------------|-------------|------------|-------------|-----|
| RMI1         | 0.26918313  | 0.10479866 | 2.07282556  |     |
| SH3BP1       | -0.26913861 | 0.10487306 | -2.07245594 |     |
| ZC3H4        | -0.26912573 | 0.10487607 | -2.07234905 |     |
| HYAL3        | -0.26912388 | 0.10487607 | -2.07233367 |     |
| GSDMB        | 0.26907672  | 0.10495568 | 2.07194218  |     |
| KREMEN2      | -0.26905238 | 0.10499052 | -2.07174017 |     |
| KRTAP10-3    | -0.26904405 | 0.10499393 | -2.07167099 |     |
| RTP4         | 0.26901198  | 0.10504397 | 2.07140477  |     |
| LOC100127980 | 0.26897880  | 0.10509621 | 2.07112935  |     |
| LOC100131554 | -0.26894526 | 0.10511028 | -2.07085098 |     |
| ZP1          | -0.26895010 | 0.10511028 | -2.07089116 |     |
| HIST1H1T     | -0.26895039 | 0.10511028 | -2.07089356 |     |
| OR51B2       | -0.26896258 | 0.10511028 | -2.07099470 |     |
| RASGEF1C     | -0.26892153 | 0.10512572 | -2.07065401 |     |
| ZNF398       | 0.26890534  | 0.10512572 | 2.07051965  | yes |
| ACTN4        | 0.26890757  | 0.10512572 | 2.07053814  |     |
| PPIL4        | 0.26892830  | 0.10512572 | 2.07071017  |     |
| TELO2        | -0.26890445 | 0.10512572 | -2.07051222 |     |
| ANTXRL       | -0.26886185 | 0.10517736 | -2.07015866 |     |
| FBXO46       | -0.26886258 | 0.10517736 | -2.07016473 |     |
| CLRN2        | -0.26885841 | 0.10517736 | -2.07013013 |     |
| RAD51L1      | 0.26884058  | 0.10519946 | 2.06998214  |     |
| LOC284379    | -0.26880011 | 0.10526610 | -2.06964628 |     |
| BEAN         | -0.26877488 | 0.10528983 | -2.06943686 |     |
| PPIA         | 0.26877879  | 0.10528983 | 2.06946931  |     |
| MFI2         | -0.26875488 | 0.10530326 | -2.06927090 |     |
| UBE2L3       | 0.26875588  | 0.10530326 | 2.06927920  |     |
| FH           | 0.26873637  | 0.10532671 | 2.06911732  |     |
| ZNF154       | -0.26869200 | 0.10540110 | -2.06874910 |     |
| OR2D3        | -0.26867176 | 0.10540987 | -2.06858108 |     |
| USP36        | -0.26866779 | 0.10540987 | -2.06854819 |     |
| TBC1D15      | 0.26867175  | 0.10540987 | 2.06858105  |     |
| B4GALNT1     | -0.26865962 | 0.10541299 | -2.06848042 |     |
| CARS         | 0.26863718  | 0.10544423 | 2.06829415  |     |
| PCDHB12      | -0.26861607 | 0.10547284 | -2.06811902 |     |
| LOC100129876 | -0.26858610 | 0.10551892 | -2.06787035 |     |
| C9orf131     | -0.26854941 | 0.10557828 | -2.06756584 |     |
| LILRA4       | -0.26853061 | 0.10560237 | -2.06740985 |     |
| FTSJD1       | 0.26848852  | 0.10566352 | 2.06706065  |     |
| USP48        | 0.26848644  | 0.10566352 | 2.06704337  |     |
| SERBP1       | 0.26847278  | 0.10567748 | 2.06693007  |     |
| HMG20A       | 0.26843539  | 0.10573813 | 2.06661989  |     |
| GABRG1       | -0.26842889 | 0.10573813 | -2.06656590 |     |
| L1TD1        | -0.26838888 | 0.10580412 | -2.06623397 |     |
| BRWD1        | 0.26830727  | 0.10595237 | 2.06555691  |     |
| KYNU         | 0.26828296  | 0.10598740 | 2.06535532  |     |
| C14orf143    | 0.26827498  | 0.10599017 | 2.06528913  |     |
| C18orf55     | 0.26824090  | 0.10604457 | 2.06500634  |     |
| GK2          | -0.26821703 | 0.10607876 | -2.06480842 |     |
| OR13C2       | -0.26820646 | 0.10608442 | -2.06472073 |     |



|              |             |            |             |     |
|--------------|-------------|------------|-------------|-----|
| C10orf88     | 0.26820101  | 0.10608442 | 2.06467554  |     |
| COG3         | 0.26819151  | 0.10609021 | 2.06459671  |     |
| SLC35A1      | 0.26817206  | 0.10611089 | 2.06443534  |     |
| FHL3         | -0.26816509 | 0.10611089 | -2.06437752 |     |
| PCSK5        | 0.26816133  | 0.10611089 | 2.06434637  | yes |
| STX3         | 0.26811224  | 0.10619504 | 2.06393921  |     |
| FTH1         | 0.26807015  | 0.10623750 | 2.06359008  |     |
| PGBD2        | 0.26806450  | 0.10623750 | 2.06354323  |     |
| NFKBID       | -0.26807826 | 0.10623750 | -2.06365739 |     |
| MBD3L1       | -0.26806786 | 0.10623750 | -2.06357109 |     |
| CDH17        | -0.26802913 | 0.10628960 | -2.06324986 |     |
| MAGI2        | -0.26802506 | 0.10628960 | -2.06321609 |     |
| RBMS1        | -0.26800513 | 0.10630324 | -2.06305079 |     |
| SSR1         | 0.26800503  | 0.10630324 | 2.06304997  |     |
| LOC100131401 | -0.26794875 | 0.10639155 | -2.06258325 |     |
| LOC284900    | -0.26794732 | 0.10639155 | -2.06257142 |     |
| PTPN3        | 0.26792394  | 0.10642489 | 2.06237750  |     |
| GABRA2       | -0.26791019 | 0.10643913 | -2.06226347 |     |
| CRISP3       | -0.26788912 | 0.10644183 | -2.06208872 |     |
| C6orf191     | -0.26789883 | 0.10644183 | -2.06216923 |     |
| GDF1         | -0.26788934 | 0.10644183 | -2.06209053 |     |
| ACSM1        | -0.26784525 | 0.10648568 | -2.06172498 |     |
| OR51L1       | -0.26782959 | 0.10648568 | -2.06159508 |     |
| SH2D1A       | 0.26782940  | 0.10648568 | 2.06159348  |     |
| MBTD1        | 0.26782212  | 0.10648568 | 2.06153317  |     |
| PRSS27       | -0.26784235 | 0.10648568 | -2.06170089 |     |
| MAGT1        | 0.26782104  | 0.10648568 | 2.06152419  |     |
| C1orf94      | -0.26785414 | 0.10648568 | -2.06179870 |     |
| ZNF618       | -0.26777511 | 0.10656379 | -2.06114333 |     |
| GPR20        | -0.26774213 | 0.10661622 | -2.06086989 |     |
| GLRA3        | -0.26772383 | 0.10663014 | -2.06071811 |     |
| CAT          | 0.26771833  | 0.10663014 | 2.06067257  |     |
| RICS         | 0.26771543  | 0.10663014 | 2.06064849  | yes |
| TMEM220      | 0.26769816  | 0.10664166 | 2.06050531  | yes |
| PROK2        | -0.26769650 | 0.10664166 | -2.06049156 |     |
| RRN3         | 0.26766558  | 0.10667701 | 2.06023515  |     |
| CAPZB        | 0.26767033  | 0.10667701 | 2.06027459  |     |
| DCAKD        | 0.26763728  | 0.10672018 | 2.06000056  |     |
| RAB8A        | 0.26761388  | 0.10675364 | 2.05980657  |     |
| ISM1         | -0.26759752 | 0.10675879 | -2.05967089 |     |
| ALOX12P2     | 0.26758867  | 0.10675879 | 2.05959751  |     |
| C9orf47      | -0.26759063 | 0.10675879 | -2.05961380 |     |
| CD1B         | -0.26758505 | 0.10675879 | -2.05956757 |     |
| ATP1B4       | -0.26755241 | 0.10678134 | -2.05929693 |     |
| HPGD         | 0.26756491  | 0.10678134 | 2.05940059  |     |
| CCDC73       | -0.26755995 | 0.10678134 | -2.05935947 |     |
| HOMER2       | -0.26754748 | 0.10678134 | -2.05925605 |     |
| IWS1         | 0.26752241  | 0.10681813 | 2.05904825  |     |
| ENPP6        | -0.26746644 | 0.10691640 | -2.05858424 |     |
| USP53        | 0.26744633  | 0.10693032 | 2.05841755  |     |

|           |             |            |             |     |
|-----------|-------------|------------|-------------|-----|
| CAPZA3    | -0.26745027 | 0.10693032 | -2.05845018 |     |
| ZFR       | 0.26739563  | 0.10700513 | 2.05799724  |     |
| NAPB      | 0.26739746  | 0.10700513 | 2.05801248  |     |
| VPS13A    | 0.26736711  | 0.10701358 | 2.05776088  |     |
| SBNO1     | 0.26736517  | 0.10701358 | 2.05774478  |     |
| COQ9      | 0.26737583  | 0.10701358 | 2.05783319  |     |
| ZFP14     | 0.26736691  | 0.10701358 | 2.05775919  |     |
| NDUFS4    | 0.26735726  | 0.10701629 | 2.05767920  |     |
| VN1R5     | -0.26733404 | 0.10703657 | -2.05748676 |     |
| USO1      | 0.26733396  | 0.10703657 | 2.05748614  |     |
| RARRES2   | -0.26730132 | 0.10708852 | -2.05721558 |     |
| LOC147727 | 0.26728339  | 0.10709816 | 2.05706692  |     |
| POLN      | -0.26728816 | 0.10709816 | -2.05710652 |     |
| SIAH1     | 0.26727057  | 0.10711063 | 2.05696071  |     |
| GOLGA5    | 0.26726099  | 0.10711668 | 2.05688128  |     |
| UGT2B10   | -0.26725439 | 0.10711679 | -2.05682655 |     |
| ENTPD2    | -0.26722243 | 0.10716741 | -2.05656169 |     |
| POLA1     | 0.26719104  | 0.10721692 | 2.05630152  |     |
| CSF1      | -0.26715186 | 0.10726814 | -2.05597682 |     |
| RNASE9    | -0.26714570 | 0.10726814 | -2.05592579 |     |
| NEK4      | 0.26715522  | 0.10726814 | 2.05600466  | yes |
| C11orf72  | -0.26713892 | 0.10726860 | -2.05586965 |     |
| TMEM61    | -0.26711736 | 0.10729856 | -2.05569090 |     |
| GPIHBP1   | -0.26704994 | 0.10741999 | -2.05513226 |     |
| C2orf60   | 0.26702219  | 0.10746232 | 2.05490229  |     |
| SPAG1     | 0.26700022  | 0.10749312 | 2.05472024  | yes |
| ABCG5     | -0.26695043 | 0.10757951 | -2.05430763 |     |
| C2orf61   | -0.26694046 | 0.10758636 | -2.05422502 |     |
| TMEM218   | 0.26692707  | 0.10758695 | 2.05411413  |     |
| PRDX6     | 0.26693172  | 0.10758695 | 2.05415265  |     |
| NUDT16    | -0.26691471 | 0.10759858 | -2.05401168 |     |
| AP4B1     | 0.26689994  | 0.10760348 | 2.05388933  |     |
| UGT2A1    | 0.26689917  | 0.10760348 | 2.05388297  |     |
| MSL3      | 0.26688169  | 0.10762535 | 2.05373811  | yes |
| PLEKHA3   | 0.26686916  | 0.10763733 | 2.05363426  |     |
| GABARAPL2 | 0.26685646  | 0.10764963 | 2.05352906  |     |
| ESPN      | -0.26684101 | 0.10766744 | -2.05340107 |     |
| FANCI     | 0.26676131  | 0.10781378 | 2.05274074  |     |
| CCR5      | -0.26671574 | 0.10789190 | -2.05236327 |     |
| EGFLAM    | -0.26666008 | 0.10799030 | -2.05190214 |     |
| MUTED     | 0.26664554  | 0.10800632 | 2.05178171  |     |
| LGI2      | -0.26658076 | 0.10812310 | -2.05124506 |     |
| PSD       | -0.26652693 | 0.10821798 | -2.05079918 |     |
| SMAP1     | 0.26649000  | 0.10827899 | 2.05049331  |     |
| AADA4L4   | -0.26647068 | 0.10830464 | -2.05033334 |     |
| HDAC7     | -0.26644253 | 0.10834806 | -2.05010015 |     |
| C10orf62  | -0.26641892 | 0.10838235 | -2.04990464 |     |
| CR1       | -0.26639086 | 0.10841246 | -2.04967222 |     |
| JARID1A   | 0.26639292  | 0.10841246 | 2.04968927  |     |
| KPNB1     | 0.26634726  | 0.10848697 | 2.04931111  |     |

|              |             |            |             |     |
|--------------|-------------|------------|-------------|-----|
| ADAMTS6      | -0.26630601 | 0.10855679 | -2.04896948 |     |
| KCNN4        | -0.26626228 | 0.10863162 | -2.04860741 |     |
| LRFN2        | -0.26622977 | 0.10868393 | -2.04833813 |     |
| DTX3L        | 0.26621679  | 0.10869689 | 2.04823069  |     |
| PDHX         | 0.26620304  | 0.10871141 | 2.04811682  |     |
| CETN3        | 0.26617595  | 0.10871330 | 2.04789251  |     |
| CLK1         | 0.26618216  | 0.10871330 | 2.04794397  |     |
| DPPA5        | -0.26618175 | 0.10871330 | -2.04794052 |     |
| ARHGAP18     | 0.26619278  | 0.10871330 | 2.04803183  |     |
| PIGM         | 0.26616260  | 0.10872702 | 2.04778200  |     |
| LOC100133325 | -0.26613122 | 0.10877707 | -2.04752216 |     |
| GPR149       | -0.26611020 | 0.10879309 | -2.04734809 |     |
| MGAT3        | -0.26611468 | 0.10879309 | -2.04738515 |     |
| CCBE1        | -0.26609078 | 0.10881510 | -2.04718726 |     |
| DNAJC13      | 0.26608621  | 0.10881510 | 2.04714946  |     |
| F2RL1        | 0.26607547  | 0.10882358 | 2.04706054  |     |
| FKBP6        | -0.26604163 | 0.10887863 | -2.04678031 |     |
| BNIP3L       | 0.26602952  | 0.10888987 | 2.04668007  |     |
| PGA5         | -0.26599766 | 0.10894094 | -2.04641631 |     |
| PHYH         | 0.26597481  | 0.10897386 | 2.04622716  |     |
| CALM1        | 0.26594881  | 0.10901314 | 2.04601189  |     |
| CLDN11       | -0.26593756 | 0.10902268 | -2.04591870 | yes |
| RGAG1        | -0.26591820 | 0.10904856 | -2.04575845 |     |
| MAD2L1       | -0.26590084 | 0.10907042 | -2.04561474 |     |
| FAM71F2      | -0.26582197 | 0.10921594 | -2.04496185 |     |
| C5orf39      | 0.26581573  | 0.10921594 | 2.04491023  |     |
| ZDHHC17      | 0.26579618  | 0.10922148 | 2.04474836  |     |
| OR6C6        | -0.26579340 | 0.10922148 | -2.04472536 |     |
| TRNT1        | 0.26579515  | 0.10922148 | 2.04473987  |     |
| EXOC8        | 0.26576693  | 0.10926178 | 2.04450626  |     |
| SEC14L4      | -0.26574233 | 0.10929831 | -2.04430265 |     |
| MYO7A        | -0.26572685 | 0.10931641 | -2.04417452 |     |
| FREQ         | -0.26571063 | 0.10933265 | -2.04404022 |     |
| IL19         | -0.26569610 | 0.10933265 | -2.04391997 |     |
| NPAT         | 0.26568893  | 0.10933265 | 2.04386065  |     |
| HSPB11       | 0.26568619  | 0.10933265 | 2.04383794  |     |
| SLCO1A2      | -0.26570083 | 0.10933265 | -2.04395911 |     |
| OR2T11       | -0.26566191 | 0.10934871 | -2.04363694 |     |
| MYL4         | -0.26565868 | 0.10934871 | -2.04361021 |     |
| CPA6         | -0.26566642 | 0.10934871 | -2.04367430 |     |
| BTBD9        | 0.26563648  | 0.10936723 | 2.04342647  | yes |
| PPCDC        | -0.26564204 | 0.10936723 | -2.04347254 |     |
| JAK1         | 0.26560564  | 0.10941640 | 2.04317128  |     |
| OR6C1        | -0.26559374 | 0.10942728 | -2.04307281 |     |
| AOC3         | -0.26557905 | 0.10944381 | -2.04295123 |     |
| DLG4         | -0.26554976 | 0.10948991 | -2.04270876 |     |
| TMEM67       | 0.26553718  | 0.10950217 | 2.04260467  |     |
| OR4A16       | -0.26553015 | 0.10950319 | -2.04254653 |     |
| CCDC125      | 0.26551616  | 0.10951832 | 2.04243072  |     |
| LOC100129278 | -0.26550748 | 0.10952269 | -2.04235889 |     |

|           |             |            |             |     |
|-----------|-------------|------------|-------------|-----|
| RCVRN     | -0.26545498 | 0.10961582 | -2.04192441 |     |
| INTS5     | -0.26544778 | 0.10961720 | -2.04186482 |     |
| SNRNP40   | 0.26542770  | 0.10964467 | 2.04169869  |     |
| CLIC1     | 0.26541284  | 0.10966157 | 2.04157572  |     |
| ERCC8     | 0.26537172  | 0.10973171 | 2.04123543  |     |
| VPS37A    | 0.26534903  | 0.10975317 | 2.04104770  |     |
| LOC728606 | -0.26534810 | 0.10975317 | -2.04104001 |     |
| UNC93A    | -0.26533784 | 0.10976076 | -2.04095509 |     |
| ATF7IP    | 0.26522538  | 0.10997575 | 2.04002462  |     |
| ARHGEF12  | 0.26519728  | 0.11000721 | 2.03979213  |     |
| VPS37C    | -0.26519686 | 0.11000721 | -2.03978863 |     |
| TNFRSF11B | -0.26518444 | 0.11001892 | -2.03968589 |     |
| TIMP3     | -0.26517806 | 0.11001892 | -2.03963312 |     |
| EVI5L     | -0.26515577 | 0.11005097 | -2.03944869 |     |
| OR2AG1    | -0.26514619 | 0.11005720 | -2.03936941 |     |
| ARHGAP10  | -0.26513239 | 0.11006213 | -2.03925526 |     |
| ORMDL1    | 0.26513074  | 0.11006213 | 2.03924157  |     |
| IQSEC2    | -0.26510004 | 0.11010085 | -2.03898767 |     |
| LOC388965 | -0.26509865 | 0.11010085 | -2.03897617 |     |
| USP37     | 0.26505661  | 0.11017309 | 2.03862833  |     |
| GMEB2     | -0.26502112 | 0.11023202 | -2.03833477 |     |
| PARP9     | 0.26499284  | 0.11027631 | 2.03810083  |     |
| MBTPS1    | 0.26497902  | 0.11028629 | 2.03798654  |     |
| CRIPT     | 0.26497491  | 0.11028629 | 2.03795249  |     |
| PDP2      | 0.26494688  | 0.11033008 | 2.03772066  |     |
| HAO2      | -0.26493199 | 0.11033627 | -2.03759748 |     |
| YWHAE     | 0.26493082  | 0.11033627 | 2.03758781  | yes |
| CLEC4M    | -0.26492425 | 0.11033639 | -2.03753346 |     |
| HIPK1     | 0.26489696  | 0.11037869 | 2.03730778  |     |
| RPS24     | 0.26488234  | 0.11039521 | 2.03718684  |     |
| UBE2B     | 0.26486786  | 0.11041144 | 2.03706709  |     |
| ANKRD12   | 0.26485107  | 0.11041913 | 2.03692820  |     |
| PAFAH1B2  | 0.26485700  | 0.11041913 | 2.03697720  |     |
| BBOX1     | 0.26481081  | 0.11047790 | 2.03659516  |     |
| LENG9     | -0.26480921 | 0.11047790 | -2.03658192 |     |
| ZBTB7A    | -0.26476443 | 0.11055266 | -2.03621161 |     |
| ZFAND5    | 0.26475951  | 0.11055266 | 2.03617088  |     |
| CACNG2    | -0.26472411 | 0.11057697 | -2.03587810 |     |
| TMEM68    | 0.26473261  | 0.11057697 | 2.03594840  |     |
| PABPC5    | -0.26471506 | 0.11057697 | -2.03580329 |     |
| CDC37L1   | 0.26473103  | 0.11057697 | 2.03593540  |     |
| CHPF      | -0.26471699 | 0.11057697 | -2.03581926 |     |
| PLEKHO1   | -0.26466163 | 0.11067266 | -2.03536146 |     |
| C4orf42   | 0.26465252  | 0.11067798 | 2.03528611  |     |
| TYSND1    | -0.26462940 | 0.11071188 | -2.03509492 |     |
| HBM       | -0.26460906 | 0.11072685 | -2.03492672 |     |
| TM7SF3    | 0.26461420  | 0.11072685 | 2.03496922  |     |
| FAM89A    | -0.26460069 | 0.11073067 | -2.03485750 |     |
| RNASE1    | -0.26457914 | 0.11074812 | -2.03467927 | yes |
| STAC      | -0.26458210 | 0.11074812 | -2.03470380 |     |

|           |             |            |             |
|-----------|-------------|------------|-------------|
| HNRNPA3P1 | -0.26455430 | 0.11078555 | -2.03447388 |
| LEPROT    | 0.26453018  | 0.11080825 | 2.03427446  |
| PRPF38A   | 0.26453202  | 0.11080825 | 2.03428970  |
| ZNF670    | 0.26449425  | 0.11086834 | 2.03397740  |
| LSM14B    | -0.26445252 | 0.11094032 | -2.03363236 |
| TSSK6     | -0.26442055 | 0.11099238 | -2.03336802 |
| SAMD10    | -0.26437702 | 0.11106811 | -2.03300808 |
| NF1       | 0.26433097  | 0.11114901 | 2.03262740  |
| SNORA51   | -0.26428412 | 0.11123162 | -2.03224007 |
| AZI1      | -0.26424018 | 0.11129500 | -2.03187680 |
| VWA5B2    | -0.26424497 | 0.11129500 | -2.03191640 |
| DAOA      | -0.26413566 | 0.11148260 | -2.03101281 |
| RGS9      | -0.26414135 | 0.11148260 | -2.03105980 |
| ARR3      | -0.26412799 | 0.11148501 | -2.03094941 |
| WBSCR22   | 0.26410522  | 0.11148907 | 2.03076119  |
| OR52A1    | -0.26410002 | 0.11148907 | -2.03071820 |
| OR6C74    | -0.26410727 | 0.11148907 | -2.03077812 |
| C14orf162 | -0.26410718 | 0.11148907 | -2.03077742 |
| SUPT16H   | 0.26407056  | 0.11153618 | 2.03047470  |
| TRAF3IP2  | 0.26404221  | 0.11158102 | 2.03024038  |
| ARMC8     | 0.26401349  | 0.11161462 | 2.03000300  |
| ATP9B     | 0.26401285  | 0.11161462 | 2.02999774  |
| IGHV7-81  | -0.26399695 | 0.11162060 | -2.02986631 |
| TYR       | -0.26400256 | 0.11162060 | -2.02991269 |
| OR2K2     | -0.26395319 | 0.11169711 | -2.02950467 |
| KIF5C     | -0.26391661 | 0.11175892 | -2.02920235 |
| VAMP3     | 0.26388527  | 0.11179707 | 2.02894331  |
| KNTC1     | 0.26388507  | 0.11179707 | 2.02894162  |
| SEC31B    | -0.26380342 | 0.11195161 | -2.02826693 |
| CASQ1     | -0.26378971 | 0.11196646 | -2.02815362 |
| MDGA2     | -0.26376853 | 0.11196997 | -2.02797857 |
| HSPA12A   | -0.26377037 | 0.11196997 | -2.02799378 |
| MAP1LC3A  | -0.26377026 | 0.11196997 | -2.02799287 |
| PRRG2     | -0.26373342 | 0.11202885 | -2.02768851 |
| GARNL3    | -0.26372517 | 0.11203247 | -2.02762033 |
| OTUD6B    | 0.26370727  | 0.11205596 | 2.02747242  |
| MTO1      | 0.26368462  | 0.11208520 | 2.02728521  |
| NSUN2     | 0.26368009  | 0.11208520 | 2.02724784  |
| CDR1      | -0.26364727 | 0.11213943 | -2.02697665 |
| SH3D19    | 0.26363460  | 0.11214004 | 2.02687194  |
| PATE2     | -0.26363400 | 0.11214004 | -2.02686697 |
| ST6GAL2   | -0.26356371 | 0.11227153 | -2.02628621 |
| TPRKB     | 0.26355591  | 0.11227421 | 2.02622183  |
| DCUN1D1   | 0.26352065  | 0.11232017 | 2.02593050  |
| OR5H2     | -0.26352455 | 0.11232017 | -2.02596270 |
| CTSL3     | -0.26349935 | 0.11233735 | -2.02575449 |
| PANK2     | 0.26350098  | 0.11233735 | 2.02576797  |
| CCR10     | -0.26342072 | 0.11247283 | -2.02510493 |
| AMIGO1    | -0.26342203 | 0.11247283 | -2.02511578 |
| MST150    | -0.26339960 | 0.11250303 | -2.02493049 |

|              |             |            |             |     |
|--------------|-------------|------------|-------------|-----|
| CKAP2L       | -0.26338192 | 0.11252615 | -2.02478443 |     |
| SNORD102     | 0.26336438  | 0.11254899 | 2.02463951  |     |
| CA7          | -0.26331353 | 0.11264065 | -2.02421948 |     |
| KIAA1826     | 0.26330254  | 0.11264996 | 2.02412869  |     |
| SSX9         | -0.26328552 | 0.11267174 | -2.02398810 |     |
| PRAMEF2      | -0.26327247 | 0.11268531 | -2.02388030 |     |
| ZNF268       | 0.26323650  | 0.11269069 | 2.02358323  |     |
| ADAMTS17     | -0.26325556 | 0.11269069 | -2.02374063 |     |
| NAP5         | -0.26325789 | 0.11269069 | -2.02375987 |     |
| ILF3         | 0.26323397  | 0.11269069 | 2.02356233  |     |
| LRRN1        | 0.26323872  | 0.11269069 | 2.02360152  |     |
| NUP85        | 0.26323097  | 0.11269069 | 2.02353753  |     |
| OR51A2       | -0.26322362 | 0.11269249 | -2.02347682 |     |
| SNX3         | 0.26321633  | 0.11269416 | 2.02341663  |     |
| LDLOC1       | -0.26318915 | 0.11273696 | -2.02319212 |     |
| LOC388946    | -0.26318101 | 0.11274038 | -2.02312493 |     |
| PRIM1        | 0.26312822  | 0.11283618 | 2.02268890  |     |
| EBI3         | -0.26305006 | 0.11297537 | -2.02204342 |     |
| tAKR         | -0.26304803 | 0.11297537 | -2.02202660 |     |
| ELK3         | 0.26299796  | 0.11301639 | 2.02161312  |     |
| LOC222699    | -0.26299583 | 0.11301639 | -2.02159556 |     |
| RICTOR       | 0.26300839  | 0.11301639 | 2.02169926  |     |
| PDE4B        | -0.26301729 | 0.11301639 | -2.02177279 |     |
| ACYP1        | 0.26299636  | 0.11301639 | 2.02159998  |     |
| ACOT6        | -0.26298603 | 0.11302327 | -2.02151465 |     |
| MAS1L        | -0.26292022 | 0.11314624 | -2.02097121 |     |
| ZNF548       | 0.26290858  | 0.11315695 | 2.02087510  |     |
| SNAPC2       | -0.26287148 | 0.11322045 | -2.02056877 | yes |
| SLC8A2       | -0.26279422 | 0.11336738 | -2.01993079 |     |
| LOC100129624 | -0.26275449 | 0.11343643 | -2.01960282 |     |
| HEBP2        | 0.26274271  | 0.11344746 | 2.01950553  | yes |
| CRTAM        | -0.26273145 | 0.11345739 | -2.01941257 |     |
| DHX33        | 0.26266318  | 0.11358584 | 2.01884894  |     |
| SSBP3        | -0.26260327 | 0.11364984 | -2.01835437 |     |
| C1orf53      | -0.26260003 | 0.11364984 | -2.01832765 |     |
| SNORA6       | -0.26261933 | 0.11364984 | -2.01848695 |     |
| TP11         | 0.26260442  | 0.11364984 | 2.01836389  |     |
| CDC5L        | 0.26260583  | 0.11364984 | 2.01837551  |     |
| PPP2R1A      | 0.26258988  | 0.11365748 | 2.01824385  |     |
| RBM45        | 0.26258076  | 0.11365875 | 2.01816854  |     |
| PCDHGA3      | -0.26257261 | 0.11365875 | -2.01810125 |     |
| RTN4         | 0.26256985  | 0.11365875 | 2.01807849  |     |
| RHOG         | -0.26254449 | 0.11369805 | -2.01786916 |     |
| C19orf46     | -0.26249342 | 0.11377742 | -2.01744754 |     |
| MAT2A        | 0.26249744  | 0.11377742 | 2.01748073  |     |
| FMN2         | -0.26248587 | 0.11377967 | -2.01738521 |     |
| CTSO         | 0.26247010  | 0.11378555 | 2.01725507  |     |
| NECAB2       | -0.26247508 | 0.11378555 | -2.01729614 |     |
| RPL22L1      | 0.26243902  | 0.11383679 | 2.01699856  |     |
| IDH3B        | 0.26242164  | 0.11385951 | 2.01685511  |     |

|              |             |            |             |     |
|--------------|-------------|------------|-------------|-----|
| NRBP2        | -0.26240110 | 0.11388883 | -2.01668555 |     |
| HEATR4       | -0.26237098 | 0.11392487 | -2.01643698 |     |
| GPR123       | -0.26237087 | 0.11392487 | -2.01643601 |     |
| F2           | -0.26232657 | 0.11400371 | -2.01607043 |     |
| CCDC25       | 0.26231830  | 0.11400747 | 2.01600218  |     |
| GNRHR        | -0.26229605 | 0.11402948 | -2.01581851 |     |
| FEZ1         | -0.26229481 | 0.11402948 | -2.01580831 | yes |
| CXorf23      | 0.26227503  | 0.11405724 | 2.01564507  |     |
| C6orf123     | -0.26216486 | 0.11427370 | -2.01473581 |     |
| TH           | -0.26214772 | 0.11429598 | -2.01459443 |     |
| GRAMD1B      | 0.26212876  | 0.11432209 | 2.01443793  |     |
| MCRS1        | 0.26208978  | 0.11438228 | 2.01411627  |     |
| PPP2CB       | 0.26208702  | 0.11438228 | 2.01409354  |     |
| RAB3GAP1     | 0.26204303  | 0.11446072 | 2.01373057  |     |
| LOC100133316 | -0.26198990 | 0.11455836 | -2.01329214 |     |
| RALY         | 0.26194501  | 0.11463879 | 2.01292175  |     |
| TNS1         | -0.26190901 | 0.11470063 | -2.01262478 |     |
| TBC1D9       | 0.26187977  | 0.11474835 | 2.01238351  |     |
| SIRT6        | -0.26184928 | 0.11479870 | -2.01213194 |     |
| KLHL33       | -0.26183690 | 0.11481108 | -2.01202987 |     |
| DARS         | 0.26178643  | 0.11490335 | 2.01161350  |     |
| ATF7IP2      | 0.26177206  | 0.11491994 | 2.01149491  |     |
| MAP2K5       | 0.26175010  | 0.11495244 | 2.01131377  |     |
| LOC257358    | -0.26170416 | 0.11503530 | -2.01093477 |     |
| TNRC6B       | 0.26168357  | 0.11505136 | 2.01076500  |     |
| HAGH         | -0.26168371 | 0.11505136 | -2.01076609 |     |
| NCOR2        | -0.26167559 | 0.11505455 | -2.01069913 |     |
| MIER1        | 0.26163327  | 0.11512985 | 2.01035003  |     |
| IFI27L2      | -0.26160203 | 0.11518190 | -2.01009236 |     |
| FBXO7        | 0.26159333  | 0.11518660 | 2.01002060  |     |
| DYNC1LI2     | 0.26156481  | 0.11519334 | 2.00978540  |     |
| GANC         | 0.26157800  | 0.11519334 | 2.00989422  |     |
| ZNF790       | 0.26156290  | 0.11519334 | 2.00976966  |     |
| NBN          | 0.26156262  | 0.11519334 | 2.00976731  |     |
| RPL15        | 0.26155780  | 0.11519334 | 2.00972761  |     |
| C7orf29      | -0.26152640 | 0.11521859 | -2.00946862 |     |
| C6orf70      | 0.26152800  | 0.11521859 | 2.00948182  |     |
| PABPN1       | -0.26153149 | 0.11521859 | -2.00951060 |     |
| SLC31A2      | -0.26151132 | 0.11523672 | -2.00934423 |     |
| TMEM86A      | -0.26147084 | 0.11527053 | -2.00901034 |     |
| C3orf54      | -0.26148375 | 0.11527053 | -2.00911684 |     |
| C14orf45     | 0.26147421  | 0.11527053 | 2.00903814  |     |
| RTN4IP1      | 0.26146294  | 0.11527053 | 2.00894523  |     |
| MTMR2        | 0.26146570  | 0.11527053 | 2.00896795  |     |
| C6orf108     | 0.26142032  | 0.11532412 | 2.00859370  |     |
| C17orf68     | -0.26142697 | 0.11532412 | -2.00864858 |     |
| FNDC1        | -0.26141808 | 0.11532412 | -2.00857527 |     |
| BCMO1        | -0.26139198 | 0.11536544 | -2.00836001 |     |
| C6orf48      | 0.26136825  | 0.11538820 | 2.00816430  |     |
| SYK          | 0.26137354  | 0.11538820 | 2.00820791  |     |

|           |             |            |             |
|-----------|-------------|------------|-------------|
| GAPDHS    | -0.26134198 | 0.11542988 | -2.00794768 |
| SHISA3    | -0.26133113 | 0.11543914 | -2.00785819 |
| SLC20A2   | 0.26131813  | 0.11545292 | 2.00775097  |
| C14orf135 | 0.26130943  | 0.11545764 | 2.00767923  |
| CEACAM6   | 0.26129733  | 0.11546953 | 2.00757944  |
| C5orf24   | 0.26124435  | 0.11556748 | 2.00714258  |
| OR4F15    | -0.26123263 | 0.11557143 | -2.00704593 |
| CTPS2     | 0.26122957  | 0.11557143 | 2.00702070  |
| MRPL55    | -0.26120574 | 0.11560802 | -2.00682426 |
| C10orf65  | -0.26117550 | 0.11564456 | -2.00657485 |
| LOC645106 | -0.26117781 | 0.11564456 | -2.00659391 |
| PARD3     | 0.26115713  | 0.11566966 | 2.00642345  |
| HEY2      | 0.26114605  | 0.11567942 | 2.00633210  |
| INPP4A    | 0.26108739  | 0.11578948 | 2.00584845  |
| GDA       | 0.26104989  | 0.11585497 | 2.00553929  |
| PCDHB17   | -0.26103248 | 0.11587811 | -2.00539570 |
| NAGS      | -0.26100519 | 0.11592209 | -2.00517074 |
| JAK2      | 0.26099097  | 0.11593849 | 2.00505350  |
| PASD1     | -0.26097320 | 0.11595276 | -2.00490697 |
| BIVM      | 0.26097131  | 0.11595276 | 2.00489145  |
| RSL1D1    | 0.26094765  | 0.11598911 | 2.00469636  |
| CNR1      | -0.26091234 | 0.11605007 | -2.00440526 |
| CXorf26   | 0.26088365  | 0.11608713 | 2.00416879  |
| PRKY      | 0.26088190  | 0.11608713 | 2.00415435  |
| NAB2      | -0.26081550 | 0.11618659 | -2.00360702 |
| STIM2     | 0.26082007  | 0.11618659 | 2.00364466  |
| PVR       | -0.26082283 | 0.11618659 | -2.00366747 |
| CLEC12A   | -0.26078034 | 0.11621288 | -2.00331719 |
| PTPN23    | -0.26077728 | 0.11621288 | -2.00329203 |
| TDRD1     | -0.26079071 | 0.11621288 | -2.00340267 |
| SLK       | 0.26078873  | 0.11621288 | 2.00338634  |
| PDZRN3    | -0.26070391 | 0.11634082 | -2.00268730 |
| FOXP2     | 0.26070433  | 0.11634082 | 2.00269075  |
| SDC4      | 0.26069080  | 0.11635493 | 2.00257921  |
| IL1B      | -0.26066658 | 0.11639256 | -2.00237958 |
| HOOK1     | 0.26065123  | 0.11641142 | 2.00225305  |
| TFCP2     | 0.26059949  | 0.11650734 | 2.00182667  |
| SLC17A8   | -0.26056444 | 0.11654665 | -2.00153778 |
| PHF11     | 0.26056716  | 0.11654665 | 2.00156022  |
| ERMP1     | 0.26056161  | 0.11654665 | 2.00151451  |
| CTSH      | 0.26053251  | 0.11659467 | 2.00127468  |
| TRIM47    | -0.26050695 | 0.11663520 | -2.00106404 |
| OR10AD1   | -0.26047449 | 0.11669037 | -2.00079656 |
| LOR       | -0.26046776 | 0.11669099 | -2.00074108 |
| FCHO1     | -0.26045447 | 0.11669185 | -2.00063159 |
| C9orf5    | 0.26045859  | 0.11669185 | 2.00066556  |
| NTAN1     | -0.26042147 | 0.11674819 | -2.00035965 |
| ANP32E    | 0.26038939  | 0.11680260 | 2.00009532  |
| KRT71     | -0.26036748 | 0.11683544 | -1.99991476 |
| NROB1     | -0.26031608 | 0.11693091 | -1.99949127 |



|              |             |            |             |     |
|--------------|-------------|------------|-------------|-----|
| IL7          | 0.26028685  | 0.11697933 | 1.99925042  |     |
| HSPE1        | 0.26023443  | 0.11707705 | 1.99881858  |     |
| ZSCAN2       | -0.26022548 | 0.11708239 | -1.99874482 |     |
| NFATC1       | -0.26020879 | 0.11710420 | -1.99860728 |     |
| SF3A3        | 0.26019716  | 0.11711524 | 1.99851146  |     |
| FAM176A      | -0.26018399 | 0.11711585 | -1.99840303 |     |
| FAM131B      | -0.26018931 | 0.11711585 | -1.99844686 |     |
| EDN2         | -0.26016301 | 0.11712348 | -1.99823020 |     |
| RPL41        | 0.26017244  | 0.11712348 | 1.99830786  |     |
| ZDHHC6       | 0.26016110  | 0.11712348 | 1.99821439  |     |
| KCNAB3       | -0.26007571 | 0.11729147 | -1.99751097 |     |
| GPR85        | -0.26004479 | 0.11734360 | -1.99725626 |     |
| MRPL13       | 0.26002543  | 0.11737112 | 1.99709683  |     |
| GOLSYN       | 0.25993550  | 0.11754908 | 1.99635602  |     |
| TM9SF4       | 0.25992330  | 0.11756137 | 1.99625552  |     |
| KLHDC6       | -0.25989058 | 0.11760202 | -1.99598603 |     |
| STT3A        | 0.25987850  | 0.11760202 | 1.99588652  |     |
| PCDHAC2      | -0.25989021 | 0.11760202 | -1.99598301 |     |
| BEND5        | 0.25988147  | 0.11760202 | 1.99591101  |     |
| PPIE         | 0.25985045  | 0.11763587 | 1.99565553  |     |
| HIVEP1       | 0.25984976  | 0.11763587 | 1.99564987  |     |
| FKBP1B       | -0.25979493 | 0.11772578 | -1.99519828 |     |
| SCCPDH       | 0.25979476  | 0.11772578 | 1.99519690  |     |
| DNAJC7       | 0.25978723  | 0.11772813 | 1.99513487  |     |
| CEP120       | 0.25976818  | 0.11773387 | 1.99497795  |     |
| MR1          | 0.25977618  | 0.11773387 | 1.99504385  |     |
| PRICKLE3     | -0.25976525 | 0.11773387 | -1.99495380 |     |
| BTBD16       | -0.25966534 | 0.11791261 | -1.99413108 |     |
| TMEM59L      | -0.25967179 | 0.11791261 | -1.99418414 |     |
| RAP1A        | 0.25966227  | 0.11791261 | 1.99410580  |     |
| CWC15        | 0.25964667  | 0.11793221 | 1.99397734  |     |
| GEFT         | -0.25962687 | 0.11796079 | -1.99381429 | yes |
| HIST1H4J     | -0.25960735 | 0.11798877 | -1.99365356 |     |
| LIN54        | 0.25958832  | 0.11801279 | 1.99349680  |     |
| AP3B1        | 0.25958326  | 0.11801279 | 1.99345517  |     |
| TMEM161B     | 0.25957376  | 0.11801936 | 1.99337694  |     |
| IFT57        | 0.25954402  | 0.11806078 | 1.99313202  |     |
| PLCZ1        | -0.25954154 | 0.11806078 | -1.99311165 |     |
| GEMIN5       | 0.25953262  | 0.11806611 | 1.99303818  |     |
| FUNDC2       | 0.25949016  | 0.11814156 | 1.99268855  |     |
| FAM103A1     | 0.25948450  | 0.11814156 | 1.99264201  |     |
| ZNF556       | -0.25946825 | 0.11816259 | -1.99250818 |     |
| HEMGN        | -0.25944177 | 0.11820553 | -1.99229013 |     |
| BCAP29       | 0.25935754  | 0.11837219 | 1.99159667  |     |
| MFSD11       | 0.25932290  | 0.11843268 | 1.99131148  |     |
| C19orf60     | -0.25927409 | 0.11852358 | -1.99090968 |     |
| FAM33A       | 0.25925627  | 0.11854802 | 1.99076300  |     |
| LOC100133346 | 0.25923915  | 0.11857096 | 1.99062208  |     |
| MINA         | 0.25922381  | 0.11859009 | 1.99049582  |     |
| RNASEN       | 0.25918943  | 0.11865010 | 1.99021280  |     |

|              |             |            |             |     |
|--------------|-------------|------------|-------------|-----|
| OR1K1        | -0.25914296 | 0.11873610 | -1.98983030 |     |
| C21orf56     | -0.25911895 | 0.11877388 | -1.98963267 |     |
| MARK1        | 0.25909258  | 0.11881675 | 1.98941559  |     |
| UBE2N        | 0.25908083  | 0.11882820 | 1.98931885  |     |
| CDAN1        | -0.25905742 | 0.11883708 | -1.98912622 |     |
| LOC25845     | -0.25906441 | 0.11883708 | -1.98918369 |     |
| LOC729808    | -0.25906007 | 0.11883708 | -1.98914798 |     |
| MRPL22       | 0.25903167  | 0.11885357 | 1.98891429  |     |
| C15orf62     | -0.25903182 | 0.11885357 | -1.98891549 |     |
| BTF3         | 0.25902919  | 0.11885357 | 1.98889388  |     |
| TRPC5        | -0.25902406 | 0.11885357 | -1.98885161 |     |
| MCM4         | 0.25894651  | 0.11899274 | 1.98821335  |     |
| TGM5         | -0.25895160 | 0.11899274 | -1.98825523 |     |
| KRT85        | -0.25893890 | 0.11899529 | -1.98815073 |     |
| TNFRSF11A    | -0.25891863 | 0.11902509 | -1.98798390 |     |
| SEPHS1       | 0.25889060  | 0.11903471 | 1.98775325  |     |
| WDR27        | 0.25888323  | 0.11903471 | 1.98769261  |     |
| CPNE7        | -0.25889207 | 0.11903471 | -1.98776530 |     |
| MRPS33       | 0.25890403  | 0.11903471 | 1.98786378  |     |
| SLC25A31     | -0.25888206 | 0.11903471 | -1.98768299 |     |
| TRIM62       | -0.25887137 | 0.11904391 | -1.98759497 |     |
| SNORD50B     | 0.25886191  | 0.11905045 | 1.98751715  |     |
| MTERFD2      | 0.25880008  | 0.11916976 | 1.98700832  |     |
| FAM48A       | 0.25878044  | 0.11919824 | 1.98684668  |     |
| C6orf10      | -0.25876069 | 0.11921642 | -1.98668416 |     |
| RAB22A       | 0.25875916  | 0.11921642 | 1.98667165  |     |
| TLR3         | 0.25873298  | 0.11925902 | 1.98645615  |     |
| VAT1         | -0.25868278 | 0.11934518 | -1.98604313 |     |
| GABRR1       | -0.25866734 | 0.11934518 | -1.98591610 |     |
| LYPD5        | -0.25867438 | 0.11934518 | -1.98597397 |     |
| BTN2A3       | -0.25867058 | 0.11934518 | -1.98594273 | yes |
| RFC3         | 0.25864867  | 0.11937160 | 1.98576250  |     |
| REV3L        | 0.25862519  | 0.11940842 | 1.98556925  |     |
| CCDC106      | -0.25857835 | 0.11949563 | -1.98518390 |     |
| MTFMT        | 0.25856135  | 0.11950464 | 1.98504401  |     |
| FAM102B      | 0.25856730  | 0.11950464 | 1.98509298  |     |
| EIF2B5       | 0.25853591  | 0.11951802 | 1.98483473  |     |
| CD1E         | -0.25854725 | 0.11951802 | -1.98492807 |     |
| CLCA2        | 0.25854046  | 0.11951802 | 1.98487213  |     |
| IARS2        | 0.25849579  | 0.11959078 | 1.98450467  |     |
| PKD1L3       | 0.25845612  | 0.11966261 | 1.98417831  |     |
| TRAK1        | 0.25844675  | 0.11966900 | 1.98410123  |     |
| ACCN1        | -0.25841774 | 0.11970398 | -1.98386258 |     |
| RBL2         | 0.25841797  | 0.11970398 | 1.98386445  |     |
| CCDC53       | 0.25836830  | 0.11979698 | 1.98345586  |     |
| C16orf86     | -0.25834851 | 0.11982590 | -1.98329310 |     |
| LOC100132005 | -0.25830403 | 0.11990123 | -1.98292723 |     |
| GYLTL1B      | -0.25830086 | 0.11990123 | -1.98290116 |     |
| TUBA8        | -0.25823017 | 0.12004036 | -1.98231968 |     |
| PPP2R5E      | 0.25821937  | 0.12004986 | 1.98223088  |     |

|            |             |            |             |     |
|------------|-------------|------------|-------------|-----|
| GBAS       | 0.25818483  | 0.12010010 | 1.98194678  |     |
| MCCD1      | -0.25816929 | 0.12010010 | -1.98181898 |     |
| LOC441239  | -0.25817434 | 0.12010010 | -1.98186049 |     |
| PTGFRN     | 0.25816413  | 0.12010010 | 1.98177649  |     |
| COLEC12    | -0.25816818 | 0.12010010 | -1.98180981 |     |
| TEX11      | -0.25814154 | 0.12013515 | -1.98159071 |     |
| SCUBE3     | -0.25813162 | 0.12014275 | -1.98150918 |     |
| NUP62      | 0.25807349  | 0.12022423 | 1.98103108  |     |
| ZBTB8OS    | 0.25806840  | 0.12022423 | 1.98098920  |     |
| C6orf222   | -0.25807971 | 0.12022423 | -1.98108222 |     |
| LRP1B      | -0.25807794 | 0.12022423 | -1.98106769 |     |
| VAMP4      | 0.25801985  | 0.12031561 | 1.98058992  |     |
| YY1AP1     | -0.25801121 | 0.12032044 | -1.98051893 |     |
| NCRNA00095 | -0.25798615 | 0.12036092 | -1.98031281 |     |
| ANKRD42    | 0.25796313  | 0.12039696 | 1.98012354  |     |
| ABCA4      | -0.25792856 | 0.12039829 | -1.97983929 |     |
| CNOT6L     | 0.25792001  | 0.12039829 | 1.97976896  |     |
| SYF2       | 0.25791130  | 0.12039829 | 1.97969734  |     |
| C22orf28   | 0.25791729  | 0.12039829 | 1.97974659  |     |
| ZNF287     | 0.25792430  | 0.12039829 | 1.97980420  |     |
| MRPS24     | -0.25791613 | 0.12039829 | -1.97973701 |     |
| CCDC61     | -0.25793891 | 0.12039829 | -1.97992439 |     |
| GGPS1      | 0.25793480  | 0.12039829 | 1.97989054  |     |
| CIB4       | -0.25785392 | 0.12050893 | -1.97922549 |     |
| PANX3      | -0.25784090 | 0.12050942 | -1.97911842 |     |
| SMAD1      | 0.25784647  | 0.12050942 | 1.97916429  |     |
| NUP35      | 0.25780268  | 0.12057850 | 1.97880421  |     |
| AGL        | 0.25775563  | 0.12066682 | 1.97841734  |     |
| LOC340096  | -0.25773945 | 0.12068807 | -1.97828432 |     |
| DNAJB14    | 0.25767566  | 0.12081285 | 1.97775989  |     |
| ITPA       | 0.25765167  | 0.12083810 | 1.97756269  |     |
| HSP90B1    | 0.25764486  | 0.12083810 | 1.97750666  |     |
| ZNF300     | 0.25764796  | 0.12083810 | 1.97753214  |     |
| FAM119B    | -0.25761634 | 0.12088623 | -1.97727219 |     |
| THY1       | -0.25758417 | 0.12094232 | -1.97700773 | yes |
| BCS1L      | 0.25754353  | 0.12101688 | 1.97667367  |     |
| HSPH1      | 0.25749962  | 0.12107794 | 1.97631269  |     |
| CSE1L      | 0.25750147  | 0.12107794 | 1.97632789  |     |
| MTX3       | 0.25749630  | 0.12107794 | 1.97628545  |     |
| CDH18      | -0.25744920 | 0.12116666 | -1.97589825 |     |
| SFRS16     | -0.25735475 | 0.12134474 | -1.97512198 |     |
| RAB6C      | -0.25735668 | 0.12134474 | -1.97513780 |     |
| LOC494141  | -0.25733511 | 0.12136669 | -1.97496050 |     |
| PADI3      | -0.25732551 | 0.12136669 | -1.97488162 |     |
| DTNBP1     | 0.25732589  | 0.12136669 | 1.97488474  |     |
| HNRNPR     | 0.25730826  | 0.12137660 | 1.97473984  |     |
| SPINK6     | -0.25730818 | 0.12137660 | -1.97473917 |     |
| RPGR       | 0.25721622  | 0.12156346 | 1.97398342  |     |
| CRYBB2     | -0.25717266 | 0.12163071 | -1.97362545 |     |
| FBLN2      | -0.25717364 | 0.12163071 | -1.97363349 |     |

|              |             |            |             |     |
|--------------|-------------|------------|-------------|-----|
| C1orf217     | 0.25716349  | 0.12163677 | 1.97355012  |     |
| ADAMTS13     | -0.25713659 | 0.12166763 | -1.97332901 |     |
| PUS7L        | 0.25713715  | 0.12166763 | 1.97333361  |     |
| C9orf170     | -0.25710815 | 0.12171585 | -1.97309530 |     |
| FKBP2        | -0.25707601 | 0.12174418 | -1.97283126 |     |
| SALL4        | -0.25708077 | 0.12174418 | -1.97287036 |     |
| FAM5B        | -0.25708256 | 0.12174418 | -1.97288508 |     |
| FZD10        | -0.25706493 | 0.12175280 | -1.97274016 |     |
| FTSJ3        | 0.25705003  | 0.12175280 | 1.97261776  |     |
| GAS6         | -0.25705264 | 0.12175280 | -1.97263917 |     |
| ASCC2        | 0.25704041  | 0.12175280 | 1.97253870  |     |
| TJAP1        | -0.25704012 | 0.12175280 | -1.97253629 |     |
| AMELX        | -0.25698081 | 0.12186860 | -1.97204896 |     |
| HEXDC        | -0.25696223 | 0.12188960 | -1.97189630 | yes |
| TH1L         | 0.25695843  | 0.12188960 | 1.97186514  |     |
| SNORA19      | 0.25689264  | 0.12201970 | 1.97132458  |     |
| CLEC2D       | 0.25687766  | 0.12202860 | 1.97120150  |     |
| IFNA21       | -0.25687580 | 0.12202860 | -1.97118620 |     |
| POU6F2       | -0.25684183 | 0.12208904 | -1.97090713 |     |
| PSMB6        | 0.25682697  | 0.12210762 | 1.97078501  |     |
| KCNJ12       | -0.25680198 | 0.12214840 | -1.97057972 |     |
| FAM126B      | 0.25679503  | 0.12214962 | 1.97052267  |     |
| ZNF443       | 0.25677000  | 0.12219052 | 1.97031697  |     |
| GCNT4        | 0.25675756  | 0.12220378 | 1.97021485  |     |
| LZTS1        | -0.25674148 | 0.12221105 | -1.97008270 |     |
| APOA2        | -0.25674471 | 0.12221105 | -1.97010922 |     |
| PLG          | -0.25663417 | 0.12243257 | -1.96920121 |     |
| LOC100133403 | -0.25660596 | 0.12243841 | -1.96896953 |     |
| SLC39A5      | -0.25661123 | 0.12243841 | -1.96901277 |     |
| ABHD6        | 0.25660900  | 0.12243841 | 1.96899443  | yes |
| POLR1E       | 0.25661649  | 0.12243841 | 1.96905598  |     |
| C11orf44     | -0.25653738 | 0.12256445 | -1.96840621 |     |
| ARHGAP22     | -0.25653583 | 0.12256445 | -1.96839350 |     |
| CCL23        | -0.25652791 | 0.12256784 | -1.96832839 |     |
| AUH          | 0.25651556  | 0.12258094 | 1.96822701  |     |
| SLC47A2      | -0.25649212 | 0.12260440 | -1.96803450 |     |
| FAM64A       | -0.25649427 | 0.12260440 | -1.96805208 |     |
| NPBWR1       | -0.25646588 | 0.12263403 | -1.96781897 |     |
| C19orf68     | -0.25647017 | 0.12263403 | -1.96785418 |     |
| FFAR2        | -0.25643828 | 0.12268071 | -1.96759224 |     |
| C1orf138     | -0.25642551 | 0.12269476 | -1.96748738 |     |
| SH2B3        | -0.25640883 | 0.12271742 | -1.96735037 |     |
| MRO          | -0.25639433 | 0.12273527 | -1.96723131 |     |
| FES          | -0.25637461 | 0.12275596 | -1.96706934 |     |
| DDX56        | 0.25637217  | 0.12275596 | 1.96704931  |     |
| RIMS1        | 0.25636234  | 0.12276355 | 1.96696858  |     |
| REG3G        | -0.25633543 | 0.12280873 | -1.96674761 |     |
| ORC3L        | 0.25632658  | 0.12281416 | 1.96667494  |     |
| PIGU         | 0.25631116  | 0.12281756 | 1.96654831  | yes |
| SIGLEC16     | -0.25630494 | 0.12281756 | -1.96649720 |     |

|          |             |            |             |
|----------|-------------|------------|-------------|
| C9orf78  | 0.25631631  | 0.12281756 | 1.96659062  |
| NHP2     | -0.25629952 | 0.12281756 | -1.96645276 |
| TAX1BP3  | 0.25629240  | 0.12281921 | 1.96639426  |
| GHRH     | -0.25626619 | 0.12286288 | -1.96617900 |
| TSGA10   | 0.25625233  | 0.12287934 | 1.96606525  |
| SLC39A6  | 0.25620580  | 0.12296778 | 1.96568315  |
| ADIG     | -0.25613072 | 0.12311921 | -1.96506666 |
| COPA     | 0.25609635  | 0.12318095 | 1.96478448  |
| TMEM39A  | 0.25607637  | 0.12321096 | 1.96462041  |
| OR10X1   | -0.25605045 | 0.12324001 | -1.96440763 |
| CRYL1    | -0.25605409 | 0.12324001 | -1.96443745 |
| SERPIND1 | -0.25597698 | 0.12338816 | -1.96380437 |
| CA3      | -0.25596844 | 0.12339293 | -1.96373429 |
| RAB31    | 0.25595597  | 0.12340640 | 1.96363190  |
| PTGIR    | -0.25588594 | 0.12354707 | -1.96305701 |
| EFHC1    | 0.25582780  | 0.12366156 | 1.96257975  |
| SERINC3  | 0.25580229  | 0.12367567 | 1.96237038  |
| ALDH9A1  | 0.25580287  | 0.12367567 | 1.96237514  |
| EHMT1    | 0.25580437  | 0.12367567 | 1.96238742  |
| TIRAP    | 0.25579425  | 0.12367937 | 1.96230434  |
| C1orf100 | -0.25578347 | 0.12368912 | -1.96221586 |
| MUT      | 0.25573580  | 0.12378052 | 1.96182456  |
| OPTN     | 0.25572128  | 0.12379856 | 1.96170540  |
| GDAP1    | 0.25568593  | 0.12386272 | 1.96141527  |
| SIGLEC11 | -0.25563009 | 0.12397233 | -1.96095697 |
| NSUN4    | 0.25557445  | 0.12408158 | 1.96050031  |
| TRAV12-2 | -0.25554949 | 0.12412281 | -1.96029545 |
| ENC1     | 0.25553230  | 0.12414682 | 1.96015434  |
| VN1R2    | -0.25551504 | 0.12417096 | -1.96001275 |
| C4orf39  | -0.25550184 | 0.12418613 | -1.95990436 |
| CLCNKB   | -0.25549013 | 0.12419148 | -1.95980827 |
| VPS41    | 0.25548362  | 0.12419148 | 1.95975487  |
| PDE1C    | -0.25546757 | 0.12419148 | -1.95962313 |
| DOCK5    | 0.25547283  | 0.12419148 | 1.95966631  |
| TMEM187  | -0.25547408 | 0.12419148 | -1.95967660 |
| TCTA     | 0.25545707  | 0.12420065 | 1.95953696  |
| C8orf31  | -0.25543945 | 0.12422560 | -1.95939243 |
| SYTL2    | 0.25541353  | 0.12426901 | 1.95917970  |
| ZFAND6   | 0.25539564  | 0.12429459 | 1.95903290  |
| C3orf26  | 0.25535375  | 0.12436178 | 1.95868919  |
| MAML1    | -0.25535265 | 0.12436178 | -1.95868015 |
| C19orf59 | -0.25529389 | 0.12444992 | -1.95819796 |
| ALDOB    | -0.25530012 | 0.12444992 | -1.95824912 |
| DDX54    | -0.25529982 | 0.12444992 | -1.95824668 |
| GNAI1    | 0.25525534  | 0.12452145 | 1.95788172  |
| CYP27B1  | -0.25522575 | 0.12457311 | -1.95763888 |
| MGC87042 | -0.25519158 | 0.12463496 | -1.95735854 |
| INSL4    | -0.25517482 | 0.12463691 | -1.95722103 |
| TEX13B   | -0.25517160 | 0.12463691 | -1.95719464 |
| CPEB1    | -0.25518071 | 0.12463691 | -1.95726935 |

|             |             |            |             |     |
|-------------|-------------|------------|-------------|-----|
| C9orf93     | 0.25515545  | 0.12465867 | 1.95706217  |     |
| ADAMTS8     | -0.25511710 | 0.12469176 | -1.95674751 |     |
| MAST4       | -0.25512417 | 0.12469176 | -1.95680551 |     |
| LOC388931   | -0.25512464 | 0.12469176 | -1.95680937 |     |
| CD47        | 0.25511513  | 0.12469176 | 1.95673132  |     |
| ATAD3C      | -0.25510815 | 0.12469314 | -1.95667404 |     |
| CREM        | 0.25508821  | 0.12472335 | 1.95651051  |     |
| FAHD2B      | -0.25507599 | 0.12473149 | -1.95641027 |     |
| OGDH        | 0.25507183  | 0.12473149 | 1.95637611  |     |
| TSPAN5      | 0.25506251  | 0.12473808 | 1.95629966  |     |
| DGKK        | -0.25500873 | 0.12482950 | -1.95585849 |     |
| RERGL       | -0.25501077 | 0.12482950 | -1.95587520 |     |
| LRRC32      | -0.25498676 | 0.12484457 | -1.95567826 |     |
| RIC8A       | 0.25499281  | 0.12484457 | 1.95572791  |     |
| BTRC        | 0.25498288  | 0.12484457 | 1.95564646  |     |
| GSTK1       | 0.25496411  | 0.12487221 | 1.95549250  |     |
| WFDC11      | -0.25495361 | 0.12488111 | -1.95540631 |     |
| FAM170A     | -0.25494741 | 0.12488111 | -1.95535544 |     |
| MCL1        | 0.25489062  | 0.12499350 | 1.95488961  |     |
| THRB        | 0.25485848  | 0.12505097 | 1.95462603  |     |
| CHAC1       | -0.25483902 | 0.12508019 | -1.95446642 |     |
| C1orf159    | -0.25481987 | 0.12510872 | -1.95430938 |     |
| TP53I11     | -0.25478324 | 0.12517627 | -1.95400894 |     |
| MRPS18B     | 0.25474467  | 0.12524817 | 1.95369260  |     |
| C20orf134   | -0.25472578 | 0.12526196 | -1.95353768 |     |
| C1orf123    | 0.25472998  | 0.12526196 | 1.95357208  |     |
| COMMD7      | 0.25468828  | 0.12530314 | 1.95323008  |     |
| ING4        | -0.25468882 | 0.12530314 | -1.95323457 |     |
| SOHLH2      | -0.25469350 | 0.12530314 | -1.95327289 |     |
| CTHRC1      | -0.25465278 | 0.12533985 | -1.95293894 |     |
| CNIH3       | -0.25465834 | 0.12533985 | -1.95298453 |     |
| RPL26P19    | -0.25466403 | 0.12533985 | -1.95303121 |     |
| DEFA6       | -0.25462747 | 0.12538219 | -1.95273141 |     |
| PHTF2       | 0.25461538  | 0.12539500 | 1.95263229  |     |
| LRRC8D      | 0.25459935  | 0.12541662 | 1.95250083  |     |
| FBP2        | -0.25457983 | 0.12544605 | -1.95234076 |     |
| IHH         | -0.25449624 | 0.12561878 | -1.95165528 |     |
| GNGT1       | -0.25442354 | 0.12574893 | -1.95105922 |     |
| C4orf41     | 0.25442166  | 0.12574893 | 1.95104375  |     |
| PPP1R9B     | -0.25441903 | 0.12574893 | -1.95102225 |     |
| HEXA        | 0.25437768  | 0.12582731 | 1.95068320  |     |
| AGGF1       | 0.25433694  | 0.12590438 | 1.95034914  |     |
| hCG_1776980 | 0.25432504  | 0.12591680 | 1.95025161  |     |
| MFF         | 0.25430625  | 0.12593045 | 1.95009754  |     |
| EBF2        | -0.25430960 | 0.12593045 | -1.95012499 |     |
| ZNF562      | 0.25426420  | 0.12600966 | 1.94975282  |     |
| MYH16       | -0.25425821 | 0.12600966 | -1.94970372 |     |
| ACD         | -0.25419128 | 0.12614560 | -1.94915496 |     |
| SLC44A4     | 0.25416421  | 0.12619210 | 1.94893307  |     |
| NQO1        | 0.25409613  | 0.12633075 | 1.94837498  | yes |

|          |             |            |             |
|----------|-------------|------------|-------------|
| EEF1B2   | -0.25404779 | 0.12642512 | -1.94797877 |
| LRRC66   | -0.25402234 | 0.12646806 | -1.94777017 |
| CPNE1    | 0.25401096  | 0.12647079 | 1.94767692  |
| RAB3D    | -0.25400842 | 0.12647079 | -1.94765609 |
| PPM1J    | -0.25393135 | 0.12662991 | -1.94702440 |
| MT1H     | -0.25390946 | 0.12664498 | -1.94684495 |
| PEF1     | 0.25391692  | 0.12664498 | 1.94690611  |
| SOX6     | -0.25390560 | 0.12664498 | -1.94681333 |
| ELOVL1   | 0.25385378  | 0.12674737 | 1.94638864  |
| UBA5     | 0.25380513  | 0.12684268 | 1.94598995  |
| KIF21A   | 0.25373403  | 0.12698870 | 1.94540727  |
| STAT4    | 0.25371123  | 0.12701680 | 1.94522045  |
| RTP3     | -0.25370887 | 0.12701680 | -1.94520107 |
| LCE1E    | -0.25368043 | 0.12706665 | -1.94496803 |
| NGFR     | -0.25367351 | 0.12706792 | -1.94491137 |
| UFC1     | 0.25366116  | 0.12708146 | 1.94481017  |
| CCDC136  | -0.25362987 | 0.12713776 | -1.94455377 |
| RAET1E   | 0.25360546  | 0.12717855 | 1.94435370  |
| DYM      | 0.25359565  | 0.12718636 | 1.94427336  |
| TTLL4    | 0.25357321  | 0.12722271 | 1.94408947  |
| SVIP     | 0.25353847  | 0.12728684 | 1.94380486  |
| OPN5     | -0.25351380 | 0.12732826 | -1.94360270 |
| HPR      | -0.25349423 | 0.12735814 | -1.94344236 |
| SCARNA5  | -0.25347419 | 0.12738910 | -1.94327816 |
| SCRN2    | -0.25344743 | 0.12743525 | -1.94305894 |
| CSH1     | -0.25342406 | 0.12747376 | -1.94286747 |
| GIMAP1   | -0.25340107 | 0.12751141 | -1.94267913 |
| KCNE2    | -0.25339203 | 0.12751749 | -1.94260509 |
| DMXL2    | 0.25337381  | 0.12754437 | 1.94245578  |
| MED8     | 0.25336226  | 0.12755614 | 1.94236116  |
| TSGA14   | 0.25331531  | 0.12764805 | 1.94197657  |
| OTUB2    | -0.25330176 | 0.12766437 | -1.94186556 |
| FLJ90680 | -0.25324673 | 0.12777465 | -1.94141482 |
| PBLD     | 0.25323229  | 0.12779300 | 1.94129650  |
| LAPTM4B  | 0.25320197  | 0.12784734 | 1.94104815  |
| HTR7P    | -0.25318162 | 0.12787908 | -1.94088150 |
| TMEM198  | -0.25316869 | 0.12789401 | -1.94077557 |
| ATP5F1   | 0.25314864  | 0.12792509 | 1.94061136  |
| C22orf36 | -0.25313540 | 0.12794072 | -1.94050292 |
| OLFML2A  | -0.25308757 | 0.12802706 | -1.94011110 |
| MPPED2   | -0.25308003 | 0.12802706 | -1.94004934 |
| A2LD1    | -0.25307831 | 0.12802706 | -1.94003532 |
| MYSM1    | 0.25306828  | 0.12803543 | 1.93995314  |
| SNPH     | -0.25305492 | 0.12805136 | -1.93984370 |
| ZNF500   | -0.25304567 | 0.12805796 | -1.93976793 |
| CSRP2BP  | 0.25297773  | 0.12815840 | 1.93921150  |
| RAD51C   | 0.25297606  | 0.12815840 | 1.93919782  |
| CCDC86   | -0.25298577 | 0.12815840 | -1.93927738 |
| CALM2    | 0.25298918  | 0.12815840 | 1.93930534  |
| COX7A2L  | 0.25294778  | 0.12820822 | 1.93896627  |

|           |             |            |             |     |
|-----------|-------------|------------|-------------|-----|
| MYO5B     | 0.25293816  | 0.12821567 | 1.93888747  |     |
| EPHB4     | -0.25292902 | 0.12822203 | -1.93881262 |     |
| TMEM22    | -0.25286917 | 0.12834362 | -1.93832252 |     |
| SNX24     | 0.25284183  | 0.12839139 | 1.93809858  | yes |
| GALNT7    | 0.25280784  | 0.12845427 | 1.93782026  |     |
| FAM123A   | -0.25279354 | 0.12847236 | -1.93770321 |     |
| MYH11     | -0.25275943 | 0.12853556 | -1.93742390 |     |
| ZNF7      | 0.25271332  | 0.12862610 | 1.93704631  |     |
| GRIA2     | -0.25268631 | 0.12867316 | -1.93682521 |     |
| BAMBI     | 0.25267710  | 0.12867624 | 1.93674974  |     |
| KTN1      | 0.25267228  | 0.12867624 | 1.93671033  |     |
| MAP3K7IP3 | 0.25265942  | 0.12867666 | 1.93660501  | yes |
| IL13      | -0.25266053 | 0.12867666 | -1.93661410 |     |
| RNY5      | -0.25265165 | 0.12867992 | -1.93654136 |     |
| CASD1     | 0.25262852  | 0.12870372 | 1.93635205  |     |
| CST7      | -0.25263100 | 0.12870372 | -1.93637232 |     |
| SCN1A     | -0.25253452 | 0.12890354 | -1.93558245 |     |
| STS       | 0.25252036  | 0.12892137 | 1.93546656  |     |
| NUP205    | 0.25245599  | 0.12903990 | 1.93493954  |     |
| TRPM5     | -0.25245574 | 0.12903990 | -1.93493751 |     |
| RAB40A    | -0.25243744 | 0.12906495 | -1.93478767 |     |
| SNORD31   | 0.25243209  | 0.12906495 | 1.93474393  |     |
| ZBTB34    | 0.25241863  | 0.12908122 | 1.93463372  |     |
| GP6       | -0.25240945 | 0.12908771 | -1.93455855 |     |
| GUCA1C    | -0.25239623 | 0.12910343 | -1.93445034 |     |
| FAH       | -0.25237940 | 0.12912739 | -1.93431257 |     |
| RNF121    | 0.25234089  | 0.12920086 | 1.93399741  |     |
| EXOC4     | 0.25233224  | 0.12920616 | 1.93392656  |     |
| HOXB8     | -0.25227373 | 0.12932539 | -1.93344767 |     |
| MPP5      | 0.25224613  | 0.12937402 | 1.93322174  |     |
| PABPC1    | 0.25219112  | 0.12948535 | 1.93277154  |     |
| USP24     | 0.25217733  | 0.12950242 | 1.93265866  |     |
| THOC2     | 0.25213347  | 0.12958832 | 1.93229967  |     |
| CLEC2B    | 0.25211487  | 0.12961641 | 1.93214744  |     |
| B2M       | 0.25208632  | 0.12966728 | 1.93191382  |     |
| JAM3      | -0.25207272 | 0.12968392 | -1.93180255 |     |
| PSENNEN   | 0.25204638  | 0.12972304 | 1.93158698  |     |
| IP6K1     | 0.25204298  | 0.12972304 | 1.93155914  |     |
| OR10T2    | -0.25201644 | 0.12976933 | -1.93134199 |     |
| TULP4     | 0.25196012  | 0.12988395 | 1.93088109  |     |
| FAM96B    | 0.25191942  | 0.12996279 | 1.93054804  |     |
| LOC728675 | -0.25191155 | 0.12996630 | -1.93048369 |     |
| CCDC107   | -0.25189067 | 0.12998516 | -1.93031279 |     |
| SUV420H1  | 0.25189372  | 0.12998516 | 1.93033777  |     |
| RAB32     | -0.25186316 | 0.13001922 | -1.93008771 |     |
| PCDH17    | -0.25186433 | 0.13001922 | -1.93009725 |     |
| LOC728196 | 0.25185354  | 0.13002677 | 1.93000897  |     |
| FXC1      | 0.25183925  | 0.13004504 | 1.92989203  |     |
| PIGG      | 0.25183215  | 0.13004679 | 1.92983399  |     |
| POLR3D    | -0.25180396 | 0.13009698 | -1.92960334 |     |



|           |             |            |             |     |
|-----------|-------------|------------|-------------|-----|
| IGDCC3    | -0.25178784 | 0.13011946 | -1.92947144 |     |
| JAKMIP3   | -0.25171110 | 0.13026667 | -1.92884360 |     |
| MYL5      | -0.25171175 | 0.13026667 | -1.92884888 |     |
| WARS2     | 0.25169995  | 0.13027776 | 1.92875235  |     |
| NR5A2     | -0.25168022 | 0.13030855 | -1.92859098 |     |
| PIK3AP1   | -0.25165375 | 0.13035487 | -1.92837435 |     |
| GMCL1L    | -0.25164408 | 0.13036255 | -1.92829526 |     |
| CIB2      | -0.25163300 | 0.13037346 | -1.92820466 |     |
| PSMA8     | -0.25160911 | 0.13041385 | -1.92800924 |     |
| SDCCAG10  | 0.25160195  | 0.13041577 | 1.92795064  |     |
| MAPK1IP1L | 0.25159139  | 0.13042551 | 1.92786423  |     |
| PEX16     | -0.25158272 | 0.13043090 | -1.92779330 |     |
| UNC13B    | 0.25155128  | 0.13045106 | 1.92753609  |     |
| SNAP47    | 0.25153859  | 0.13045106 | 1.92743229  |     |
| C2orf65   | -0.25153973 | 0.13045106 | -1.92744162 |     |
| SLC24A3   | -0.25156044 | 0.13045106 | -1.92761102 |     |
| LOC728637 | -0.25155754 | 0.13045106 | -1.92758732 |     |
| NOL10     | 0.25153600  | 0.13045106 | 1.92741110  |     |
| MDH1      | 0.25152536  | 0.13046099 | 1.92732407  |     |
| CRYBA4    | -0.25147634 | 0.13055923 | -1.92692313 |     |
| SH2D2A    | -0.25143443 | 0.13064116 | -1.92658031 |     |
| ZNF302    | 0.25141273  | 0.13066200 | 1.92640285  |     |
| ATRN      | 0.25141640  | 0.13066200 | 1.92643286  |     |
| TMEM69    | 0.25139816  | 0.13068100 | 1.92628364  |     |
| EPHX2     | 0.25133157  | 0.13081833 | 1.92573904  |     |
| FLJ37543  | -0.25131959 | 0.13081833 | -1.92564105 |     |
| GGTLC2    | -0.25132489 | 0.13081833 | -1.92568441 |     |
| PDXDC1    | 0.25127994  | 0.13088060 | 1.92531674  |     |
| C9orf70   | -0.25128428 | 0.13088060 | -1.92535225 |     |
| SLC35E3   | 0.25127058  | 0.13088761 | 1.92524018  |     |
| EIF1B     | 0.25123006  | 0.13093932 | 1.92490878  |     |
| CEP110    | 0.25123266  | 0.13093932 | 1.92493009  |     |
| MOBK1A    | 0.25122919  | 0.13093932 | 1.92490173  |     |
| MAEA      | 0.25120320  | 0.13095555 | 1.92468915  |     |
| C8orf42   | -0.25121455 | 0.13095555 | -1.92478201 |     |
| TXNL1     | 0.25120771  | 0.13095555 | 1.92472607  |     |
| THSD7B    | -0.25118424 | 0.13098470 | -1.92453410 |     |
| PEX11B    | 0.25117616  | 0.13098877 | 1.92446803  |     |
| ZFP91     | 0.25115719  | 0.13101796 | 1.92431290  |     |
| ARSE      | -0.25114586 | 0.13102954 | -1.92422021 |     |
| LOC129293 | -0.25113382 | 0.13104273 | -1.92412180 |     |
| C2orf63   | 0.25111448  | 0.13106337 | 1.92396362  |     |
| HSD17B1   | -0.25109435 | 0.13106337 | -1.92379904 |     |
| KRTAP6-2  | -0.25110466 | 0.13106337 | -1.92388335 |     |
| NFATC4    | -0.25108699 | 0.13106337 | -1.92373882 | yes |
| BACH1     | 0.25109167  | 0.13106337 | 1.92377709  |     |
| WISP2     | -0.25110545 | 0.13106337 | -1.92388983 |     |
| CNP       | -0.25107642 | 0.13107318 | -1.92365243 |     |
| MAP9      | 0.25103487  | 0.13115452 | 1.92331264  |     |
| GRM6      | -0.25101603 | 0.13118344 | -1.92315860 |     |

|              |             |            |             |
|--------------|-------------|------------|-------------|
| LOC100128884 | -0.25096668 | 0.13127777 | -1.92275510 |
| ABCA3        | -0.25095625 | 0.13127777 | -1.92266984 |
| TUBD1        | 0.25095915  | 0.13127777 | 1.92269351  |
| VGLL2        | -0.25089535 | 0.13138936 | -1.92217186 |
| MRPS5        | 0.25089956  | 0.13138936 | 1.92220627  |
| NT5DC4       | -0.25082565 | 0.13153595 | -1.92160205 |
| LOC100133434 | -0.25080547 | 0.13156803 | -1.92143710 |
| MTMR12       | 0.25079681  | 0.13157347 | 1.92136630  |
| ABHD14A      | -0.25072503 | 0.13172505 | -1.92077950 |
| CLK4         | 0.25071753  | 0.13172782 | 1.92071812  |
| RNF219       | 0.25064580  | 0.13187940 | 1.92013182  |
| MAP4K5       | 0.25057885  | 0.13198834 | 1.91958451  |
| SAMD13       | -0.25058896 | 0.13198834 | -1.91966722 |
| ZDHHC5       | 0.25056727  | 0.13198834 | 1.91948985  |
| GM2A         | 0.25057054  | 0.13198834 | 1.91951662  |
| GPR84        | -0.25057989 | 0.13198834 | -1.91959305 |
| RAB25        | 0.25052569  | 0.13207016 | 1.91915005  |
| C12orf50     | -0.25046378 | 0.13219925 | -1.91864403 |
| TLR1         | 0.25045371  | 0.13220799 | 1.91856169  |
| F9           | -0.25040381 | 0.13230926 | -1.91815390 |
| CDC42EP5     | -0.25036980 | 0.13237365 | -1.91787593 |
| LCA5         | 0.25034248  | 0.13242249 | 1.91765268  |
| RBM12B       | 0.25031693  | 0.13246724 | 1.91744385  |
| PMS2L4       | 0.25027387  | 0.13255274 | 1.91709201  |
| SESN1        | 0.25026410  | 0.13256078 | 1.91701218  |
| LOC728361    | -0.25024340 | 0.13259427 | -1.91684303 |
| OR5K3        | -0.25023140 | 0.13260753 | -1.91674492 |
| SYT6         | -0.25019725 | 0.13267234 | -1.91646590 |
| MURC         | -0.25017420 | 0.13271133 | -1.91627754 |
| C2orf79      | 0.25013162  | 0.13279583 | 1.91592965  |
| SPOPL        | 0.25011189  | 0.13282711 | 1.91576843  |
| SNORA52      | -0.25009989 | 0.13284038 | -1.91567036 |
| LOC150197    | -0.25007905 | 0.13285953 | -1.91550011 |
| C22orf37     | -0.25008061 | 0.13285953 | -1.91551280 |
| TMPRSS12     | -0.25002015 | 0.13290368 | -1.91501886 |
| LCE1B        | -0.25002358 | 0.13290368 | -1.91504689 |
| MDFI         | -0.25001596 | 0.13290368 | -1.91498463 |
| PAFAH1B1     | 0.25001742  | 0.13290368 | 1.91499651  |
| USP28        | 0.25003287  | 0.13290368 | 1.91512277  |
| DRGX         | -0.25001957 | 0.13290368 | -1.91501414 |
| CD3G         | 0.25004783  | 0.13290368 | 1.91524497  |
| IRX6         | -0.24999436 | 0.13293936 | -1.91480810 |
| C10orf84     | 0.24996713  | 0.13298816 | 1.91458563  |
| GBP6         | 0.24992552  | 0.13299698 | 1.91424577  |
| C2CD3        | 0.24995575  | 0.13299698 | 1.91449270  |
| NME7         | 0.24993694  | 0.13299698 | 1.91433900  |
| KCNJ2        | 0.24994156  | 0.13299698 | 1.91437676  |
| MSL2         | 0.24994623  | 0.13299698 | 1.91441495  |
| LOC646799    | -0.24993103 | 0.13299698 | -1.91429072 |
| SNORD7       | 0.24984735  | 0.13316469 | 1.91360715  |

|              |             |            |             |
|--------------|-------------|------------|-------------|
| SON          | 0.24983884  | 0.13316985 | 1.91353760  |
| RAD21        | 0.24983022  | 0.13317525 | 1.91346722  |
| LOC65998     | -0.24980584 | 0.13321746 | -1.91326807 |
| LOC100128064 | -0.24976991 | 0.13323209 | -1.91297452 |
| ICA1L        | 0.24976689  | 0.13323209 | 1.91294984  |
| C7orf27      | -0.24976148 | 0.13323209 | -1.91290569 |
| LOC440337    | -0.24976838 | 0.13323209 | -1.91296203 |
| STYXL1       | 0.24975548  | 0.13323209 | 1.91285666  |
| TEX10        | 0.24977621  | 0.13323209 | 1.91302597  |
| TCEAL7       | -0.24978250 | 0.13323209 | -1.91307738 |
| ST8SIA5      | -0.24972539 | 0.13325166 | -1.91261090 |
| GRAMD1C      | 0.24972365  | 0.13325166 | 1.91259666  |
| SSX5         | -0.24972641 | 0.13325166 | -1.91261918 |
| TNFAIP3      | 0.24972191  | 0.13325166 | 1.91258245  |
| LIM2         | -0.24966856 | 0.13336158 | -1.91214669 |
| LOC644334    | -0.24963520 | 0.13342483 | -1.91187420 |
| C21orf30     | -0.24960276 | 0.13348019 | -1.91160929 |
| ST6GALNAC5   | -0.24959893 | 0.13348019 | -1.91157795 |
| DDX42        | 0.24958647  | 0.13349459 | 1.91147625  |
| ATG2B        | 0.24957200  | 0.13351371 | 1.91135807  |
| C10orf59     | -0.24951411 | 0.13363441 | -1.91088528 |
| UBE3B        | 0.24946771  | 0.13372830 | 1.91050631  |
| GALNT13      | -0.24945265 | 0.13374119 | -1.91038330 |
| KCNJ15       | 0.24944961  | 0.13374119 | 1.91035853  |
| FAM120C      | 0.24939990  | 0.13384291 | 1.90995251  |
| SMARCC1      | 0.24936836  | 0.13390205 | 1.90969499  |
| PECR         | 0.24933615  | 0.13396281 | 1.90943195  |
| PSORS1C1     | -0.24932388 | 0.13397681 | -1.90933180 |
| ZNF124       | 0.24931410  | 0.13398498 | 1.90925193  |
| FLJ44313     | -0.24929982 | 0.13400370 | -1.90913535 |
| GRAP         | -0.24928202 | 0.13403070 | -1.90898995 |
| ZC3H12C      | 0.24926932  | 0.13404572 | 1.90888628  |
| TP53INP2     | -0.24925626 | 0.13406160 | -1.90877961 |
| RFX3         | 0.24922623  | 0.13411729 | 1.90853442  |
| CALD1        | -0.24920817 | 0.13413014 | -1.90838696 |
| ZFAND2A      | 0.24921267  | 0.13413014 | 1.90842374  |
| DPY19L2P2    | 0.24918951  | 0.13415916 | 1.90823459  |
| HDAC9        | 0.24916998  | 0.13419024 | 1.90807513  |
| RGS18        | -0.24914303 | 0.13423873 | -1.90785512 |
| UNQ5840      | -0.24910578 | 0.13431143 | -1.90755101 |
| IL17RC       | -0.24907305 | 0.13437354 | -1.90728380 |
| MYO1E        | 0.24906203  | 0.13438464 | 1.90719386  |
| CDKN2B       | -0.24904038 | 0.13440596 | -1.90701710 |
| TLK1         | 0.24904051  | 0.13440596 | 1.90701814  |
| CAV3         | -0.24901785 | 0.13443152 | -1.90683317 |
| NR1D2        | 0.24901693  | 0.13443152 | 1.90682563  |
| WDR49        | 0.24894935  | 0.13456084 | 1.90627394  |
| ASS1         | 0.24895190  | 0.13456084 | 1.90629480  |
| C1orf59      | 0.24888994  | 0.13461821 | 1.90578898  |
| B4GALNT4     | -0.24888796 | 0.13461821 | -1.90577283 |

|              |             |            |             |     |
|--------------|-------------|------------|-------------|-----|
| GPR87        | 0.24888561  | 0.13461821 | 1.90575363  |     |
| CHTF18       | -0.24888094 | 0.13461821 | -1.90571556 |     |
| hCG_22804    | 0.24889553  | 0.13461821 | 1.90583461  |     |
| TESK1        | -0.24891760 | 0.13461821 | -1.90601475 |     |
| MAP4K4       | 0.24888763  | 0.13461821 | 1.90577016  |     |
| SLC2A12      | 0.24885451  | 0.13466561 | 1.90549980  |     |
| NME6         | 0.24882451  | 0.13469927 | 1.90525494  |     |
| TINAG        | -0.24883365 | 0.13469927 | -1.90532953 |     |
| C6orf50      | -0.24882135 | 0.13469927 | -1.90522916 |     |
| CYB5RL       | -0.24880319 | 0.13472278 | -1.90508092 |     |
| GOLPH3       | 0.24879880  | 0.13472278 | 1.90504502  |     |
| LDHB         | 0.24875163  | 0.13481903 | 1.90466004  |     |
| SLC4A1       | -0.24871558 | 0.13488914 | -1.90436583 |     |
| RBM5         | 0.24870235  | 0.13490551 | 1.90425782  |     |
| CRH          | -0.24864639 | 0.13499225 | -1.90380117 | yes |
| C20orf152    | -0.24860807 | 0.13499225 | -1.90348843 |     |
| LCN12        | -0.24860273 | 0.13499225 | -1.90344479 |     |
| FOXA3        | -0.24861851 | 0.13499225 | -1.90357360 |     |
| FURIN        | -0.24861739 | 0.13499225 | -1.90356449 |     |
| AGPAT3       | 0.24860920  | 0.13499225 | 1.90349762  |     |
| SEPN1        | -0.24863142 | 0.13499225 | -1.90367896 |     |
| PRRG3        | -0.24861733 | 0.13499225 | -1.90356400 |     |
| RNASEH2B     | 0.24862039  | 0.13499225 | 1.90358898  |     |
| MTL5         | -0.24862771 | 0.13499225 | -1.90364865 |     |
| CAST         | 0.24858888  | 0.13501009 | 1.90333179  | yes |
| LOC100128988 | -0.24857078 | 0.13503795 | -1.90318410 |     |
| SUMF2        | 0.24854226  | 0.13509038 | 1.90295138  |     |
| CGA          | -0.24851827 | 0.13512802 | -1.90275555 |     |
| HTR1A        | -0.24851375 | 0.13512802 | -1.90271868 |     |
| CACNB2       | -0.24848205 | 0.13518798 | -1.90246002 |     |
| SR140        | 0.24846032  | 0.13522445 | 1.90228266  |     |
| HJURP        | -0.24843990 | 0.13525625 | -1.90211604 |     |
| MS4A5        | -0.24843429 | 0.13525625 | -1.90207028 |     |
| DEPDC6       | -0.24841635 | 0.13528377 | -1.90192391 |     |
| DTWD1        | 0.24839254  | 0.13532518 | 1.90172958  |     |
| MYCBP2       | 0.24837715  | 0.13534669 | 1.90160403  |     |
| ZADH2        | 0.24836123  | 0.13536945 | 1.90147417  |     |
| NACAD        | -0.24833830 | 0.13540879 | -1.90128708 |     |
| OR1J4        | -0.24828565 | 0.13549751 | -1.90085749 |     |
| GUSB         | 0.24828192  | 0.13549751 | 1.90082708  |     |
| BTBD12       | -0.24828368 | 0.13549751 | -1.90084136 |     |
| ETV3         | 0.24825761  | 0.13551356 | 1.90062871  |     |
| CNTNAP1      | -0.24825846 | 0.13551356 | -1.90063562 | yes |
| MRPL19       | 0.24825631  | 0.13551356 | 1.90061813  |     |
| FBXO36       | 0.24819288  | 0.13563385 | 1.90010061  |     |
| FPR2         | -0.24819512 | 0.13563385 | -1.90011884 |     |
| C6orf211     | 0.24818081  | 0.13564756 | 1.90000214  |     |
| FLJ46365     | -0.24814226 | 0.13570907 | -1.89968764 |     |
| AZI2         | 0.24814403  | 0.13570907 | 1.89970206  |     |
| LASS5        | 0.24812276  | 0.13574037 | 1.89952854  |     |

|           |             |            |             |
|-----------|-------------|------------|-------------|
| DAPK1     | -0.24811357 | 0.13574727 | -1.89945362 |
| C6orf57   | 0.24804382  | 0.13589627 | 1.89888460  |
| DLX6      | -0.24803181 | 0.13589627 | -1.89878664 |
| ESD       | 0.24803653  | 0.13589627 | 1.89882517  |
| ZNF487    | 0.24801665  | 0.13590195 | 1.89866300  |
| TALDO1    | 0.24802183  | 0.13590195 | 1.89870522  |
| WNT8B     | -0.24801060 | 0.13590195 | -1.89861363 |
| C7orf30   | 0.24798666  | 0.13592663 | 1.89841835  |
| PLA2G4D   | -0.24797881 | 0.13592663 | -1.89835435 |
| RPS26P11  | -0.24797511 | 0.13592663 | -1.89832413 |
| PKIA      | -0.24798874 | 0.13592663 | -1.89843529 |
| SPZ1      | -0.24794544 | 0.13598205 | -1.89808213 |
| SCUBE1    | -0.24792020 | 0.13602700 | -1.89787626 |
| DSG1      | -0.24789054 | 0.13608244 | -1.89763430 |
| LOC645870 | -0.24786462 | 0.13612901 | -1.89742295 |
| ACO2      | 0.24784537  | 0.13615981 | 1.89726589  |
| FOLR3     | -0.24781516 | 0.13620534 | -1.89701954 |
| LOC646853 | -0.24781364 | 0.13620534 | -1.89700708 |
| GCA       | 0.24780171  | 0.13621875 | 1.89690985  |
| FABP3     | -0.24772842 | 0.13633419 | -1.89631213 |
| LEKR1     | 0.24772800  | 0.13633419 | 1.89630866  |
| SYNC      | -0.24774600 | 0.13633419 | -1.89645546 |
| ZNF518A   | 0.24772941  | 0.13633419 | 1.89632018  |
| C16orf62  | 0.24770020  | 0.13638530 | 1.89608194  |
| PIK3IP1   | 0.24762759  | 0.13654286 | 1.89548983  |
| ZBTB38    | 0.24761297  | 0.13656271 | 1.89537061  |
| CEP170    | 0.24760027  | 0.13657800 | 1.89526704  |
| PHF20L1   | 0.24757995  | 0.13661142 | 1.89510132  |
| EPHA4     | 0.24755173  | 0.13666359 | 1.89487126  |
| FAM173B   | 0.24750111  | 0.13675620 | 1.89445845  |
| VN1R1     | -0.24750026 | 0.13675620 | -1.89445156 |
| RANBP6    | 0.24743564  | 0.13683545 | 1.89392467  |
| UBE2T     | 0.24745951  | 0.13683545 | 1.89411926  |
| C9orf153  | -0.24744931 | 0.13683545 | -1.89403612 |
| FAM71F1   | -0.24744012 | 0.13683545 | -1.89396123 |
| RIMS3     | -0.24744259 | 0.13683545 | -1.89398137 |
| ZBTB5     | 0.24742186  | 0.13685333 | 1.89381235  |
| TCHHL1    | -0.24739694 | 0.13689775 | -1.89360912 |
| SYT13     | -0.24738695 | 0.13690662 | -1.89352768 |
| DUSP18    | 0.24734759  | 0.13697051 | 1.89320680  |
| DMRTC2    | -0.24735098 | 0.13697051 | -1.89323444 |
| MRPL12    | -0.24733953 | 0.13697481 | -1.89314105 |
| DGCR14    | -0.24726852 | 0.13712906 | -1.89256214 |
| FGF20     | -0.24724948 | 0.13715951 | -1.89240693 |
| GLRA2     | -0.24716558 | 0.13734466 | -1.89172301 |
| CCDC82    | 0.24715621  | 0.13735208 | 1.89164661  |
| DEFB127   | -0.24712835 | 0.13740362 | -1.89141955 |
| CHRNA7    | -0.24710929 | 0.13741937 | -1.89126416 |
| GNL1      | -0.24710297 | 0.13741937 | -1.89121267 |
| TUBB4Q    | -0.24710767 | 0.13741937 | -1.89125096 |

|          |             |            |             |     |
|----------|-------------|------------|-------------|-----|
| SNX1     | 0.24709504  | 0.13742337 | 1.89114802  |     |
| XAGE3    | -0.24706565 | 0.13747860 | -1.89090840 |     |
| UGT2B17  | -0.24705307 | 0.13749368 | -1.89080592 |     |
| USP33    | 0.24701380  | 0.13757252 | 1.89048586  |     |
| SLC34A3  | -0.24700031 | 0.13757487 | -1.89037584 |     |
| RARRES3  | 0.24700036  | 0.13757487 | 1.89037626  |     |
| SYNGR3   | -0.24698747 | 0.13759059 | -1.89027120 |     |
| EIF2C4   | 0.24694128  | 0.13766375 | 1.88989478  |     |
| NFKBIL1  | -0.24693808 | 0.13766375 | -1.88986867 |     |
| CASK     | 0.24694929  | 0.13766375 | 1.88996003  |     |
| RGR      | -0.24692907 | 0.13767034 | -1.88979520 |     |
| GRK7     | -0.24687982 | 0.13777312 | -1.88939383 |     |
| KIAA2022 | -0.24683412 | 0.13786745 | -1.88902142 |     |
| TTYH3    | -0.24681743 | 0.13788520 | -1.88888541 |     |
| LAGE3    | -0.24681419 | 0.13788520 | -1.88885900 |     |
| C4orf6   | -0.24679575 | 0.13790500 | -1.88870869 |     |
| WFDC2    | 0.24678810  | 0.13790500 | 1.88864633  |     |
| AMZ2     | 0.24678090  | 0.13790500 | 1.88858772  |     |
| TDRG1    | -0.24678344 | 0.13790500 | -1.88860838 |     |
| C19orf41 | -0.24673967 | 0.13798872 | -1.88825169 |     |
| HUWE1    | 0.24670219  | 0.13806348 | 1.88794628  |     |
| TNFAIP8  | 0.24667513  | 0.13811330 | 1.88772582  |     |
| USP9Y    | 0.24663005  | 0.13820634 | 1.88735847  | yes |
| ALG14    | 0.24654770  | 0.13834907 | 1.88668749  |     |
| SNORD54  | 0.24654551  | 0.13834907 | 1.88666962  |     |
| TAC1     | -0.24654970 | 0.13834907 | -1.88670381 |     |
| ZNF133   | -0.24654923 | 0.13834907 | -1.88669996 |     |
| TMEM182  | 0.24653197  | 0.13836654 | 1.88655932  |     |
| PCNX     | 0.24649078  | 0.13843593 | 1.88622371  |     |
| HMGB1    | 0.24649054  | 0.13843593 | 1.88622181  |     |
| CNRIP1   | -0.24647828 | 0.13845037 | -1.88612185 |     |
| LAP3     | 0.24643593  | 0.13852064 | 1.88577686  |     |
| RPA1     | 0.24643675  | 0.13852064 | 1.88578352  |     |
| GDPD5    | -0.24643025 | 0.13852064 | -1.88573055 |     |
| TTC37    | 0.24640880  | 0.13855711 | 1.88555585  |     |
| RARB     | 0.24638571  | 0.13858254 | 1.88536774  |     |
| MYLK3    | -0.24639193 | 0.13858254 | -1.88541842 |     |
| SERTAD3  | 0.24634601  | 0.13866288 | 1.88504430  |     |
| POLD1    | -0.24633686 | 0.13866985 | -1.88496976 |     |
| DDX55    | 0.24632752  | 0.13867729 | 1.88489365  |     |
| FZD4     | -0.24631922 | 0.13868221 | -1.88482607 |     |
| ZC3H8    | 0.24629294  | 0.13871533 | 1.88461197  |     |
| NAV3     | -0.24629480 | 0.13871533 | -1.88462710 |     |
| TEDDM1   | -0.24628582 | 0.13871742 | -1.88455402 |     |
| CENPB    | -0.24627906 | 0.13871866 | -1.88449893 |     |
| MRPL21   | -0.24626479 | 0.13873795 | -1.88438264 |     |
| ST8SIA2  | -0.24625780 | 0.13873974 | -1.88432572 |     |
| GRIN1    | -0.24624452 | 0.13875664 | -1.88421757 |     |
| TMIE     | -0.24620043 | 0.13880257 | -1.88385843 |     |
| HTT      | 0.24620599  | 0.13880257 | 1.88390372  |     |

|              |             |            |             |
|--------------|-------------|------------|-------------|
| DCUN1D5      | 0.24620838  | 0.13880257 | 1.88392315  |
| TRIM63       | -0.24620901 | 0.13880257 | -1.88392831 |
| KCND2        | -0.24618740 | 0.13881888 | -1.88375232 |
| KIAA0652     | 0.24616728  | 0.13885225 | 1.88358841  |
| CXorf48      | -0.24611481 | 0.13896341 | -1.88316106 |
| ZBPB         | -0.24608178 | 0.13902690 | -1.88289201 |
| MFSD6L       | -0.24607594 | 0.13902690 | -1.88284443 |
| OVCH1        | -0.24604421 | 0.13908823 | -1.88258603 |
| C14orf23     | -0.24601430 | 0.13914302 | -1.88234240 |
| FOXRED1      | 0.24600897  | 0.13914302 | 1.88229902  |
| UFSP2        | 0.24598436  | 0.13918724 | 1.88209861  |
| CTSG         | -0.24596572 | 0.13919080 | -1.88194678 |
| SH2B1        | -0.24596951 | 0.13919080 | -1.88197767 |
| OR5K4        | -0.24596417 | 0.13919080 | -1.88193413 |
| ZNF217       | 0.24593837  | 0.13923790 | 1.88172405  |
| CLDN5        | -0.24590738 | 0.13929753 | -1.88147168 |
| LOC728554    | -0.24589866 | 0.13930349 | -1.88140070 |
| ARIH1        | 0.24586609  | 0.13935590 | 1.88113546  |
| C16orf81     | -0.24585197 | 0.13935590 | -1.88102042 |
| ZNF773       | -0.24585494 | 0.13935590 | -1.88104460 |
| FPGT         | 0.24585967  | 0.13935590 | 1.88108316  |
| BCL11B       | -0.24584352 | 0.13936122 | -1.88095163 |
| FXR1         | 0.24583115  | 0.13937600 | 1.88085091  |
| RBBP6        | 0.24580329  | 0.13942813 | 1.88062403  |
| SNAPC1       | 0.24573119  | 0.13958701 | 1.88003692  |
| ZNF830       | 0.24570213  | 0.13964208 | 1.87980031  |
| LOC100131613 | -0.24563241 | 0.13977626 | -1.87923268 |
| CYP4A11      | -0.24564004 | 0.13977626 | -1.87929477 |
| HRASLS2      | 0.24562161  | 0.13977626 | 1.87914476  |
| CKAP5        | 0.24562366  | 0.13977626 | 1.87916144  |
| LOC100130089 | -0.24559509 | 0.13978718 | -1.87892880 |
| INSIG2       | 0.24560020  | 0.13978718 | 1.87897043  |
| JTV1         | 0.24559215  | 0.13978718 | 1.87890489  |
| LOC84740     | -0.24560903 | 0.13978718 | -1.87904228 |
| FAM105A      | 0.24554953  | 0.13987510 | 1.87855786  |
| LOC400657    | -0.24553276 | 0.13989777 | -1.87842141 |
| C4orf40      | -0.24552690 | 0.13989777 | -1.87837369 |
| MATR3        | 0.24552145  | 0.13989777 | 1.87832925  |
| FLJ40194     | -0.24546392 | 0.14002177 | -1.87786095 |
| RAB23        | 0.24543463  | 0.14007753 | 1.87762252  |
| FLJ30679     | -0.24541100 | 0.14008947 | -1.87743014 |
| SERP2        | -0.24542078 | 0.14008947 | -1.87750978 |
| RORA         | 0.24541396  | 0.14008947 | 1.87745422  |
| ZDHHC2       | 0.24535919  | 0.14019977 | 1.87700836  |
| ELOF1        | -0.24535196 | 0.14020217 | -1.87694957 |
| JMJD2A       | 0.24533154  | 0.14023653 | 1.87678331  |
| KCNA1        | -0.24531913 | 0.14024031 | -1.87668233 |
| MOP-1        | 0.24531751  | 0.14024031 | 1.87666915  |
| ZNF585A      | 0.24530214  | 0.14024736 | 1.87654402  |
| LILRA6       | -0.24530439 | 0.14024736 | -1.87656232 |

|              |             |            |             |     |
|--------------|-------------|------------|-------------|-----|
| MUC13        | 0.24527941  | 0.14028732 | 1.87635898  |     |
| RPL23        | 0.24525708  | 0.14032631 | 1.87617723  |     |
| ZNF285A      | -0.24521072 | 0.14041028 | -1.87579993 |     |
| FLJ38379     | -0.24520373 | 0.14041028 | -1.87574299 |     |
| TRIM25       | 0.24520909  | 0.14041028 | 1.87578662  |     |
| ST3GAL5      | -0.24519746 | 0.14041039 | -1.87569195 |     |
| RAP1GDS1     | 0.24518740  | 0.14041967 | 1.87561007  |     |
| C11orf55     | -0.24515445 | 0.14046880 | -1.87534189 |     |
| RNF146       | 0.24514844  | 0.14046880 | 1.87529303  |     |
| NRIP2        | -0.24515633 | 0.14046880 | -1.87535727 |     |
| CCNYL3       | -0.24512156 | 0.14051887 | -1.87507424 |     |
| ABCA1        | 0.24503849  | 0.14065992 | 1.87439822  |     |
| ELOVL2       | -0.24505422 | 0.14065992 | -1.87452618 |     |
| C14orf118    | 0.24504298  | 0.14065992 | 1.87443477  |     |
| CD38         | 0.24504075  | 0.14065992 | 1.87441662  |     |
| RABL5        | 0.24502744  | 0.14067164 | 1.87430825  |     |
| SLC30A8      | -0.24500828 | 0.14068791 | -1.87415235 |     |
| KRT77        | -0.24501043 | 0.14068791 | -1.87416985 |     |
| TCEAL6       | -0.24497968 | 0.14071616 | -1.87391963 |     |
| ZYG11A       | -0.24498196 | 0.14071616 | -1.87393817 |     |
| ZXDA         | -0.24497797 | 0.14071616 | -1.87390567 |     |
| JOSD1        | 0.24489946  | 0.14089164 | 1.87326681  |     |
| LY75         | 0.24488234  | 0.14091809 | 1.87312755  |     |
| C20orf3      | 0.24484427  | 0.14099491 | 1.87281775  |     |
| SLC18A1      | -0.24483828 | 0.14099491 | -1.87276901 |     |
| C8orf44      | 0.24481844  | 0.14102801 | 1.87260756  |     |
| MUC15        | 0.24478642  | 0.14109071 | 1.87234703  | yes |
| ADCY6        | -0.24476039 | 0.14113888 | -1.87213524 |     |
| C17orf59     | -0.24474197 | 0.14116853 | -1.87198542 |     |
| SFRS8        | -0.24470179 | 0.14125116 | -1.87165845 |     |
| UBA52        | 0.24467254  | 0.14129593 | 1.87142048  |     |
| SNIP         | -0.24467094 | 0.14129593 | -1.87140751 |     |
| CHRNA3       | -0.24464430 | 0.14133049 | -1.87119076 |     |
| C1orf128     | 0.24464644  | 0.14133049 | 1.87120821  |     |
| FLJ39639     | -0.24462118 | 0.14137163 | -1.87100266 |     |
| INSL3        | -0.24458648 | 0.14144098 | -1.87072040 |     |
| ADAM18       | -0.24452217 | 0.14158251 | -1.87019724 |     |
| C9orf16      | -0.24449622 | 0.14163061 | -1.86998614 |     |
| PHYHD1       | -0.24448773 | 0.14163615 | -1.86991703 |     |
| MXD4         | -0.24444026 | 0.14171607 | -1.86953093 |     |
| HIC1         | -0.24442119 | 0.14171607 | -1.86937581 |     |
| SC22CB-1E7.1 | -0.24443673 | 0.14171607 | -1.86950220 |     |
| ZRANB1       | 0.24442770  | 0.14171607 | 1.86942875  |     |
| RIPPLY1      | -0.24441764 | 0.14171607 | -1.86934688 |     |
| KCNG4        | -0.24442905 | 0.14171607 | -1.86943976 |     |
| FLJ41603     | -0.24440092 | 0.14172651 | -1.86921092 |     |
| OPCML        | -0.24440125 | 0.14172651 | -1.86921364 |     |
| ATPIF1       | 0.24439250  | 0.14173187 | 1.86914247  |     |
| RING1        | -0.24437921 | 0.14174914 | -1.86903430 |     |
| FLJ14107     | -0.24436975 | 0.14175704 | -1.86895741 |     |



|              |             |            |             |     |
|--------------|-------------|------------|-------------|-----|
| PKD2L1       | -0.24435300 | 0.14178273 | -1.86882118 |     |
| MAGEB6B      | -0.24434029 | 0.14178341 | -1.86871780 |     |
| SLC35E2      | 0.24434514  | 0.14178341 | 1.86875722  |     |
| COX11        | 0.24432402  | 0.14179251 | 1.86858546  |     |
| CPB2         | -0.24431912 | 0.14179251 | -1.86854557 |     |
| CYP17A1      | -0.24431792 | 0.14179251 | -1.86853584 |     |
| ETAA1        | 0.24429961  | 0.14182203 | 1.86838687  |     |
| C8B          | -0.24429104 | 0.14182778 | -1.86831718 |     |
| MIPEP        | 0.24427312  | 0.14185634 | 1.86817145  |     |
| MEGF10       | -0.24426174 | 0.14186895 | -1.86807888 |     |
| RAX2         | -0.24424796 | 0.14188743 | -1.86796678 |     |
| ZNF248       | 0.24419902  | 0.14199173 | 1.86756878  |     |
| GC           | -0.24417834 | 0.14199672 | -1.86740061 |     |
| C4orf44      | -0.24418665 | 0.14199672 | -1.86746816 |     |
| PHLDB3       | -0.24418237 | 0.14199672 | -1.86743343 |     |
| C9orf79      | -0.24417039 | 0.14199729 | -1.86733597 |     |
| TMEM133      | 0.24415600  | 0.14199729 | 1.86721893  |     |
| CCDC149      | -0.24415327 | 0.14199729 | -1.86719673 |     |
| TMSB10       | 0.24415349  | 0.14199729 | 1.86719850  |     |
| LIPJ         | -0.24409526 | 0.14207439 | -1.86672496 |     |
| GDPD1        | 0.24411216  | 0.14207439 | 1.86686241  |     |
| OR6F1        | -0.24410536 | 0.14207439 | -1.86680710 |     |
| KPNA4        | 0.24409066  | 0.14207439 | 1.86668759  |     |
| KIF26B       | -0.24410249 | 0.14207439 | -1.86678376 |     |
| RPL4         | 0.24407596  | 0.14209514 | 1.86656804  |     |
| CENPV        | -0.24406439 | 0.14210824 | -1.86647395 |     |
| MAFA         | -0.24405544 | 0.14210879 | -1.86640113 |     |
| RPS6P1       | -0.24405175 | 0.14210879 | -1.86637119 |     |
| CYB5D1       | 0.24404308  | 0.14211483 | 1.86630064  |     |
| FLNB         | 0.24402994  | 0.14213177 | 1.86619380  |     |
| TMCC1        | 0.24400202  | 0.14218483 | 1.86596675  |     |
| TNK2         | -0.24398071 | 0.14219142 | -1.86579352 |     |
| SULT1B1      | -0.24398515 | 0.14219142 | -1.86582956 |     |
| UPF3B        | 0.24398668  | 0.14219142 | 1.86584202  |     |
| PAWR         | 0.24395410  | 0.14224130 | 1.86557713  |     |
| C14orf56     | -0.24393752 | 0.14226666 | -1.86544234 |     |
| LOC100133415 | -0.24392612 | 0.14227509 | -1.86534963 |     |
| MLLT4        | 0.24392167  | 0.14227509 | 1.86531346  | yes |
| ANKRD26      | 0.24390672  | 0.14229302 | 1.86519186  |     |
| DHX29        | 0.24390194  | 0.14229302 | 1.86515297  |     |
| UNQ565       | 0.24382536  | 0.14244950 | 1.86453041  |     |
| C14orf48     | -0.24381315 | 0.14244950 | -1.86443113 |     |
| KRT18P49     | -0.24381371 | 0.14244950 | -1.86443565 |     |
| LOC400891    | 0.24382371  | 0.14244950 | 1.86451698  |     |
| DNAJC4       | -0.24380307 | 0.14245901 | -1.86434911 |     |
| DUSP19       | 0.24378880  | 0.14247876 | 1.86423310  |     |
| LCA5L        | 0.24377781  | 0.14249039 | 1.86414381  |     |
| MUTYH        | -0.24377165 | 0.14249039 | -1.86409366 |     |
| WTAP         | 0.24376359  | 0.14249495 | 1.86402814  |     |
| ZNF17        | 0.24374061  | 0.14253600 | 1.86384137  |     |

|          |             |            |             |
|----------|-------------|------------|-------------|
| ATP5A1   | 0.24370798  | 0.14259416 | 1.86357610  |
| HAO1     | -0.24370446 | 0.14259416 | -1.86354745 |
| SLCO4C1  | 0.24369780  | 0.14259531 | 1.86349329  |
| ZNF479   | -0.24367351 | 0.14263960 | -1.86329584 |
| JARID1B  | 0.24363948  | 0.14266211 | 1.86301919  |
| CCDC79   | -0.24363335 | 0.14266211 | -1.86296934 |
| TMEM132A | -0.24364890 | 0.14266211 | -1.86309578 |
| RASAL1   | -0.24364500 | 0.14266211 | -1.86306404 |
| CARD6    | 0.24365759  | 0.14266211 | 1.86316646  |
| SDC3     | -0.24361724 | 0.14268638 | -1.86283842 |
| C8orf48  | -0.24357759 | 0.14276834 | -1.86251611 |
| RNU5F    | -0.24354036 | 0.14282921 | -1.86221350 |
| SCIN     | 0.24354441  | 0.14282921 | 1.86224642  |
| ZNF761   | 0.24353236  | 0.14283364 | 1.86214847  |
| R3HDM2   | 0.24352085  | 0.14284668 | 1.86205488  |
| CYP2B7P1 | 0.24350708  | 0.14286526 | 1.86194294  |
| C4orf7   | -0.24347305 | 0.14293351 | -1.86166634 |
| NPC2     | 0.24339436  | 0.14311135 | 1.86102676  |
| DNAJC2   | 0.24336992  | 0.14314094 | 1.86082813  |
| OTUD5    | -0.24337269 | 0.14314094 | -1.86085063 |
| SUZ12    | 0.24336004  | 0.14314999 | 1.86074785  |
| TINAGL1  | -0.24333531 | 0.14319552 | -1.86054681 |
| PAPSS1   | 0.24331756  | 0.14322389 | 1.86040259  |
| MLNR     | -0.24325267 | 0.14336809 | -1.85987523 |
| OR2B2    | -0.24324436 | 0.14337329 | -1.85980772 |
| ZFX      | 0.24321989  | 0.14341822 | 1.85960885  |
| ZNF571   | 0.24321132  | 0.14342407 | 1.85953919  |
| POU5F1   | -0.24319813 | 0.14344127 | -1.85943203 |
| STAMBPL1 | 0.24316970  | 0.14349595 | 1.85920102  |
| AP3M2    | 0.24312775  | 0.14355258 | 1.85886007  |
| C21orf90 | -0.24312654 | 0.14355258 | -1.85885028 |
| PDE11A   | -0.24311864 | 0.14355258 | -1.85878608 |
| PDGFA    | -0.24311318 | 0.14355258 | -1.85874169 |
| ADAM22   | -0.24312502 | 0.14355258 | -1.85883791 |
| C16orf3  | -0.24310955 | 0.14355258 | -1.85871216 |
| RGS9BP   | -0.24309438 | 0.14357467 | -1.85858893 |
| KRT35    | -0.24306083 | 0.14364197 | -1.85831635 |
| WFDC6    | 0.24304745  | 0.14365968 | 1.85820763  |
| MASTL    | 0.24302384  | 0.14370257 | 1.85801573  |
| VPS26B   | 0.24301407  | 0.14371140 | 1.85793634  |
| LPIN1    | -0.24297144 | 0.14377064 | -1.85759002 |
| IRF1     | 0.24297314  | 0.14377064 | 1.85760382  |
| RIPK4    | 0.24298363  | 0.14377064 | 1.85768905  |
| ZNF566   | 0.24295561  | 0.14379440 | 1.85746137  |
| TNNC2    | -0.24292277 | 0.14386005 | -1.85719454 |
| CDT1     | -0.24290700 | 0.14388365 | -1.85706647 |
| NLRP9    | -0.24285835 | 0.14398830 | -1.85667117 |
| COMMD1   | 0.24283921  | 0.14400881 | 1.85651569  |
| SELK     | 0.24283147  | 0.14400881 | 1.85645285  |
| PIGY     | 0.24283653  | 0.14400881 | 1.85649392  |

|          |             |            |             |
|----------|-------------|------------|-------------|
| CEACAM7  | 0.24281574  | 0.14403077 | 1.85632498  |
| CRYBG3   | 0.24281020  | 0.14403077 | 1.85628003  |
| KCTD17   | -0.24278261 | 0.14408356 | -1.85605587 |
| FLJ44635 | -0.24272576 | 0.14420854 | -1.85559402 |
| TCF3     | -0.24271945 | 0.14420885 | -1.85554279 |
| ZNF687   | -0.24270797 | 0.14422192 | -1.85544952 |
| FLJ27243 | -0.24269173 | 0.14424674 | -1.85531761 |
| SNRPD3   | 0.24268543  | 0.14424704 | 1.85526640  |
| ACTA2    | -0.24266047 | 0.14429338 | -1.85506369 |
| ZNF92    | 0.24264715  | 0.14429841 | 1.85495548  |
| RGS20    | -0.24264607 | 0.14429841 | -1.85494674 |
| ZMAT5    | -0.24254071 | 0.14454338 | -1.85409094 |
| B3GALT6  | -0.24252750 | 0.14456076 | -1.85398362 |
| IGF1     | 0.24250646  | 0.14459165 | 1.85381276  |
| MMP16    | -0.24250264 | 0.14459165 | -1.85378171 |
| OR5B2    | -0.24245332 | 0.14469832 | -1.85338116 |
| KCTD2    | -0.24238407 | 0.14485439 | -1.85281872 |
| GRIP2    | -0.24237509 | 0.14486131 | -1.85274582 |
| OPLAH    | -0.24235028 | 0.14490744 | -1.85254433 |
| PLXNA4   | -0.24233949 | 0.14491885 | -1.85245670 |
| FLJ32063 | -0.24226105 | 0.14509788 | -1.85181969 |
| FBXO45   | 0.24221500  | 0.14519672 | 1.85144577  |
| TMC3     | -0.24217598 | 0.14526284 | -1.85112893 |
| SNORA21  | -0.24217830 | 0.14526284 | -1.85114779 |
| ENPP7    | -0.24216598 | 0.14527232 | -1.85104768 |
| DCP1A    | 0.24214233  | 0.14531566 | 1.85085566  |
| SSFA2    | 0.24212470  | 0.14534407 | 1.85071253  |
| WDR40C   | -0.24209373 | 0.14539026 | -1.85046107 |
| KCNK2    | -0.24209706 | 0.14539026 | -1.85048810 |
| C12orf72 | 0.24207610  | 0.14541220 | 1.85031790  |
| THBS4    | -0.24207253 | 0.14541220 | -1.85028896 |
| FLJ35424 | -0.24204964 | 0.14545369 | -1.85010312 |
| FLJ39653 | -0.24202529 | 0.14549445 | -1.84990539 |
| KLK9     | -0.24201469 | 0.14549445 | -1.84981935 |
| OR5W2    | -0.24201600 | 0.14549445 | -1.84982998 |
| TUBGCP2  | 0.24192206  | 0.14570927 | 1.84906728  |
| EIF2AK3  | 0.24191564  | 0.14570988 | 1.84901515  |
| ACVR1C   | -0.24190640 | 0.14571748 | -1.84894018 |
| CABP5    | -0.24189854 | 0.14572168 | -1.84887632 |
| C17orf56 | -0.24187683 | 0.14576028 | -1.84870012 |
| CRBN     | 0.24185310  | 0.14580394 | 1.84850747  |
| PRDX5    | 0.24178301  | 0.14596279 | 1.84793851  |
| RFX5     | 0.24177691  | 0.14596279 | 1.84788894  |
| CA5BP    | -0.24174426 | 0.14602207 | -1.84762392 |
| MMP19    | -0.24174074 | 0.14602207 | -1.84759538 |
| GYPC     | -0.24173072 | 0.14603165 | -1.84751401 |
| S100A16  | 0.24167036  | 0.14615396 | 1.84702406  |
| NCAPD3   | 0.24166926  | 0.14615396 | 1.84701518  |
| PTPN22   | 0.24165847  | 0.14616547 | 1.84692756  |
| JMJD4    | -0.24162281 | 0.14623894 | -1.84663814 |

|          |             |            |             |     |
|----------|-------------|------------|-------------|-----|
| G6PC2    | -0.24160060 | 0.14626588 | -1.84645784 |     |
| UBE3A    | 0.24159965  | 0.14626588 | 1.84645016  |     |
| KRT86    | -0.24158516 | 0.14628662 | -1.84633254 |     |
| MYH1     | -0.24156283 | 0.14632690 | -1.84615131 |     |
| INA      | -0.24152111 | 0.14641555 | -1.84581274 |     |
| DNAJC3   | 0.24149371  | 0.14646850 | 1.84559038  |     |
| GPR182   | -0.24147934 | 0.14648327 | -1.84547372 |     |
| ACACB    | -0.24147545 | 0.14648327 | -1.84544214 |     |
| RAB3IP   | 0.24141973  | 0.14660695 | 1.84498998  |     |
| UPF2     | 0.24140011  | 0.14660968 | 1.84483080  |     |
| LARP6    | -0.24140478 | 0.14660968 | -1.84486862 |     |
| SNORD78  | 0.24141047  | 0.14660968 | 1.84491487  |     |
| FKTN     | 0.24139069  | 0.14661781 | 1.84475428  |     |
| NDUFA8   | 0.24137908  | 0.14663137 | 1.84466011  |     |
| RINL     | -0.24136811 | 0.14664336 | -1.84457109 |     |
| PMAIP1   | 0.24134045  | 0.14669703 | 1.84434662  |     |
| IL17B    | -0.24129775 | 0.14678829 | -1.84400016 |     |
| OR2C1    | -0.24128579 | 0.14680276 | -1.84390310 |     |
| LOC84931 | -0.24127109 | 0.14682409 | -1.84378378 |     |
| CYHR1    | -0.24125477 | 0.14684944 | -1.84365141 |     |
| CDH7     | -0.24123371 | 0.14688502 | -1.84348048 |     |
| PLEKHA6  | -0.24122203 | 0.14688502 | -1.84338575 |     |
| XK       | -0.24122216 | 0.14688502 | -1.84338681 |     |
| ARL13B   | 0.24119820  | 0.14692919 | 1.84319234  |     |
| DUSP12   | 0.24115620  | 0.14696687 | 1.84285157  |     |
| ORMDL2   | 0.24116834  | 0.14696687 | 1.84295006  |     |
| FAM165B  | 0.24116117  | 0.14696687 | 1.84289195  |     |
| GNB1L    | -0.24114285 | 0.14696687 | -1.84274330 |     |
| WRNIP1   | 0.24115145  | 0.14696687 | 1.84281304  |     |
| DHX35    | 0.24113996  | 0.14696687 | 1.84271981  |     |
| NME5     | 0.24114995  | 0.14696687 | 1.84280084  |     |
| DLG1     | 0.24110869  | 0.14702966 | 1.84246609  |     |
| NFYB     | 0.24108957  | 0.14704665 | 1.84231097  |     |
| PRKX     | 0.24109152  | 0.14704665 | 1.84232683  |     |
| WDR31    | 0.24107603  | 0.14704967 | 1.84220111  |     |
| TERC     | -0.24107659 | 0.14704967 | -1.84220566 |     |
| WDR44    | 0.24105428  | 0.14708866 | 1.84202470  |     |
| VKORC1L1 | 0.24102122  | 0.14712610 | 1.84175647  |     |
| TASP1    | 0.24102319  | 0.14712610 | 1.84177248  |     |
| TAOK1    | 0.24101467  | 0.14712610 | 1.84170330  |     |
| DNER     | 0.24101791  | 0.14712610 | 1.84172962  |     |
| KHDRBS3  | 0.24098597  | 0.14718250 | 1.84147049  |     |
| DNAJB11  | 0.24094179  | 0.14727770 | 1.84111207  |     |
| CYP3A4   | -0.24085370 | 0.14746931 | -1.84039749 |     |
| FAM65A   | -0.24085299 | 0.14746931 | -1.84039176 | yes |
| HISPPD1  | 0.24083052  | 0.14749474 | 1.84020951  |     |
| PC       | -0.24083588 | 0.14749474 | -1.84025298 |     |
| TTY12    | -0.24079959 | 0.14754139 | -1.83995862 |     |
| CDC25C   | -0.24080396 | 0.14754139 | -1.83999408 |     |
| NDUFB7   | -0.24077412 | 0.14758982 | -1.83975203 |     |

|              |             |            |             |     |
|--------------|-------------|------------|-------------|-----|
| PHF13        | -0.24075265 | 0.14760430 | -1.83957787 |     |
| USP25        | 0.24073754  | 0.14760430 | 1.83945533  |     |
| IL2          | -0.24074203 | 0.14760430 | -1.83949173 |     |
| WNT16        | -0.24074216 | 0.14760430 | -1.83949278 |     |
| SH3TC1       | -0.24076113 | 0.14760430 | -1.83964663 |     |
| C10orf107    | 0.24070008  | 0.14765194 | 1.83915145  |     |
| GPSM3        | -0.24070345 | 0.14765194 | -1.83917876 |     |
| C3orf71      | -0.24070669 | 0.14765194 | -1.83920510 |     |
| TSHZ1        | 0.24065745  | 0.14774345 | 1.83880573  |     |
| HEATR7B1     | -0.24058632 | 0.14790659 | -1.83822886 |     |
| ZNF318       | -0.24055844 | 0.14796117 | -1.83800272 |     |
| CREB5        | -0.24054309 | 0.14798426 | -1.83787826 |     |
| POLK         | 0.24049834  | 0.14808128 | 1.83751531  |     |
| RAP2A        | 0.24049183  | 0.14808216 | 1.83746251  |     |
| CCDC88C      | 0.24037861  | 0.14835152 | 1.83654444  |     |
| PODNL1       | -0.24034651 | 0.14841686 | -1.83628410 |     |
| LOC391358    | -0.24030956 | 0.14844786 | -1.83598454 |     |
| NUMB         | 0.24032665  | 0.14844786 | 1.83612314  |     |
| VNN1         | 0.24031418  | 0.14844786 | 1.83602201  |     |
| SLC16A5      | 0.24031718  | 0.14844786 | 1.83604632  |     |
| ARHGDI B     | 0.24028577  | 0.14849227 | 1.83579167  |     |
| STK32A       | -0.24027098 | 0.14851403 | -1.83567170 |     |
| NACC2        | -0.24023554 | 0.14858781 | -1.83538438 |     |
| RPN2         | 0.24019899  | 0.14866445 | 1.83508801  |     |
| TEX13A       | -0.24018379 | 0.14868725 | -1.83496478 |     |
| ILDR2        | -0.24017736 | 0.14868793 | -1.83491264 |     |
| ZNF507       | 0.24016752  | 0.14869722 | 1.83483285  | yes |
| LOC100129566 | -0.24011225 | 0.14882037 | -1.83438477 |     |
| OR7G1        | -0.24010639 | 0.14882037 | -1.83433726 |     |
| ABL2         | 0.24008223  | 0.14886579 | 1.83414144  |     |
| C16orf75     | -0.24002829 | 0.14898644 | -1.83370411 |     |
| FGFR4        | -0.23998230 | 0.14907665 | -1.83333135 |     |
| C7orf50      | -0.23998026 | 0.14907665 | -1.83331481 |     |
| C5orf33      | 0.23996176  | 0.14910786 | 1.83316479  |     |
| CCDC48       | -0.23993545 | 0.14915878 | -1.83295156 |     |
| ATP6V1A      | 0.23990141  | 0.14922926 | 1.83267567  |     |
| PCDH19       | -0.23987197 | 0.14928816 | -1.83243697 |     |
| C10orf82     | -0.23986091 | 0.14930056 | -1.83234732 |     |
| FAM110B      | -0.23985419 | 0.14930197 | -1.83229291 |     |
| PART1        | -0.23981665 | 0.14936581 | -1.83198858 |     |
| BBS9         | 0.23981877  | 0.14936581 | 1.83200575  |     |
| SNX5         | 0.23980171  | 0.14937245 | 1.83186751  |     |
| CDCA3        | -0.23980362 | 0.14937245 | -1.83188297 |     |
| ROS1         | -0.23979302 | 0.14937886 | -1.83179711 |     |
| C6orf141     | -0.23977710 | 0.14940359 | -1.83166801 |     |
| SLC25A22     | -0.23977025 | 0.14940533 | -1.83161255 |     |
| DYRK2        | 0.23975609  | 0.14942559 | 1.83149778  |     |
| ASXL2        | 0.23972845  | 0.14947999 | 1.83127373  | yes |
| AFMID        | -0.23970663 | 0.14951965 | -1.83109690 |     |
| TUBAL3       | -0.23968947 | 0.14954752 | -1.83095782 |     |

|              |             |            |             |     |
|--------------|-------------|------------|-------------|-----|
| ZXDB         | -0.23961447 | 0.14970633 | -1.83034999 |     |
| ZNF506       | 0.23961962  | 0.14970633 | 1.83039173  |     |
| FBXL19       | -0.23959834 | 0.14973160 | -1.83021933 |     |
| MARVELD2     | 0.23956096  | 0.14981078 | 1.82991634  | yes |
| C6orf225     | 0.23955346  | 0.14981420 | 1.82985555  |     |
| SNORD45B     | 0.23950026  | 0.14993352 | 1.82942445  |     |
| HHLA3        | -0.23947412 | 0.14998424 | -1.82921264 |     |
| LOC441268    | -0.23946763 | 0.14998509 | -1.82916007 |     |
| CBY1         | 0.23944791  | 0.15000390 | 1.82900029  |     |
| DDX24        | 0.23944886  | 0.15000390 | 1.82900800  |     |
| HPS5         | 0.23943517  | 0.15002063 | 1.82889704  |     |
| PPP1R10      | 0.23938219  | 0.15010828 | 1.82846775  |     |
| TRAF6        | 0.23938258  | 0.15010828 | 1.82847096  |     |
| C14orf2      | 0.23939283  | 0.15010828 | 1.82855402  |     |
| LOC100133386 | -0.23936559 | 0.15013480 | -1.82833329 |     |
| ZNF461       | 0.23934753  | 0.15016504 | 1.82818697  |     |
| DHFRL1       | 0.23934100  | 0.15016603 | 1.82813400  |     |
| GABRR2       | -0.23931659 | 0.15020380 | -1.82793622 |     |
| GATA3        | -0.23931290 | 0.15020380 | -1.82790635 |     |
| CARD10       | -0.23930768 | 0.15020380 | -1.82786404 | yes |
| KIFAP3       | 0.23928743  | 0.15023961 | 1.82770001  |     |
| FLJ45721     | -0.23927885 | 0.15024579 | -1.82763050 |     |
| CANX         | 0.23925876  | 0.15028121 | 1.82746772  |     |
| CLDN16       | 0.23916471  | 0.15045503 | 1.82670577  |     |
| CYB5D2       | 0.23914526  | 0.15045503 | 1.82654818  |     |
| PUS10        | 0.23917087  | 0.15045503 | 1.82675570  |     |
| C14orf147    | 0.23916696  | 0.15045503 | 1.82672398  |     |
| LCTL         | -0.23913506 | 0.15045503 | -1.82646559 |     |
| PDS5B        | 0.23914270  | 0.15045503 | 1.82652749  |     |
| GRP          | 0.23914861  | 0.15045503 | 1.82657536  |     |
| CLDN20       | -0.23913819 | 0.15045503 | -1.82649091 |     |
| SLN          | -0.23916118 | 0.15045503 | -1.82667714 |     |
| APOM         | -0.23911360 | 0.15049400 | -1.82629169 |     |
| SNW1         | 0.23909194  | 0.15052997 | 1.82611622  |     |
| LOC100133435 | -0.23908716 | 0.15052997 | -1.82607757 |     |
| SEC22B       | 0.23904555  | 0.15062022 | 1.82574043  |     |
| ABI2         | 0.23901799  | 0.15065909 | 1.82551718  |     |
| KRTAP4-6     | -0.23902023 | 0.15065909 | -1.82553538 |     |
| KRT83        | -0.23899658 | 0.15069795 | -1.82534376 |     |
| TRIM31       | 0.23892654  | 0.15086067 | 1.82477644  |     |
| B3GALT1      | -0.23888781 | 0.15094371 | -1.82446273 |     |
| FYCO1        | 0.23887305  | 0.15096506 | 1.82434318  |     |
| C9orf123     | 0.23886714  | 0.15096506 | 1.82429536  |     |
| GPRC6A       | -0.23884197 | 0.15098226 | -1.82409148 |     |
| WDR53        | 0.23884805  | 0.15098226 | 1.82414075  |     |
| RAD17        | 0.23885373  | 0.15098226 | 1.82418671  |     |
| COTL1        | -0.23880547 | 0.15102976 | -1.82379589 |     |
| SHC4         | -0.23881117 | 0.15102976 | -1.82384207 |     |
| CD2          | 0.23880491  | 0.15102976 | 1.82379136  |     |
| PHF3         | 0.23877480  | 0.15107680 | 1.82354746  |     |

|           |             |            |             |     |
|-----------|-------------|------------|-------------|-----|
| NPY5R     | -0.23877418 | 0.15107680 | -1.82354249 |     |
| OR52B4    | -0.23876380 | 0.15108653 | -1.82345836 |     |
| SLC38A11  | -0.23875809 | 0.15108653 | -1.82341214 |     |
| STEAP2    | 0.23874980  | 0.15109201 | 1.82334504  |     |
| LOC642587 | 0.23865137  | 0.15132081 | 1.82254787  |     |
| CXorf21   | 0.23864785  | 0.15132081 | 1.82251939  |     |
| SEC61A2   | 0.23862541  | 0.15136244 | 1.82233764  |     |
| ZCCHC9    | 0.23858641  | 0.15143352 | 1.82202186  |     |
| KRT36     | -0.23858530 | 0.15143352 | -1.82201285 |     |
| POLI      | 0.23855435  | 0.15149689 | 1.82176225  |     |
| RAB10     | 0.23849512  | 0.15159076 | 1.82128262  |     |
| IRF6      | 0.23849307  | 0.15159076 | 1.82126606  |     |
| ASAP3     | -0.23849351 | 0.15159076 | -1.82126963 |     |
| RAP2C     | 0.23849418  | 0.15159076 | 1.82127501  |     |
| WDR19     | 0.23845997  | 0.15165968 | 1.82099806  |     |
| TOMM70A   | 0.23844101  | 0.15169249 | 1.82084449  |     |
| IFI30     | 0.23839744  | 0.15178823 | 1.82049176  |     |
| SPAM1     | -0.23835247 | 0.15187191 | -1.82012765 |     |
| CHST9     | 0.23835695  | 0.15187191 | 1.82016393  |     |
| GOLGA1    | 0.23833970  | 0.15188889 | 1.82002426  |     |
| HSPA13    | 0.23833016  | 0.15189760 | 1.81994701  |     |
| CDH15     | -0.23828679 | 0.15199292 | -1.81959593 |     |
| ACSS1     | -0.23824018 | 0.15209663 | -1.81921853 |     |
| DLX4      | -0.23821835 | 0.15213684 | -1.81904182 |     |
| MYB       | 0.23819792  | 0.15217346 | 1.81887647  | yes |
| MGC33894  | -0.23818714 | 0.15218536 | -1.81878921 |     |
| CYP7A1    | -0.23815076 | 0.15226292 | -1.81849466 |     |
| CYP3A7    | -0.23812544 | 0.15231212 | -1.81828969 |     |
| IL1RAP    | 0.23810268  | 0.15235477 | 1.81810545  |     |
| LOC646813 | 0.23807866  | 0.15240066 | 1.81791101  |     |
| TNMD      | -0.23806760 | 0.15241330 | -1.81782149 |     |
| ASB14     | 0.23803384  | 0.15248418 | 1.81754828  |     |
| APOL1     | 0.23801460  | 0.15251782 | 1.81739254  |     |
| SYNPR     | -0.23799199 | 0.15256015 | -1.81720947 |     |
| SNORA55   | -0.23797835 | 0.15257942 | -1.81709907 |     |
| SIRPA     | -0.23796594 | 0.15257977 | -1.81699867 |     |
| MASP1     | -0.23796915 | 0.15257977 | -1.81702465 |     |
| TAF8      | -0.23793725 | 0.15262444 | -1.81676643 |     |
| ZFYVE28   | -0.23793628 | 0.15262444 | -1.81675861 |     |
| CLN6      | 0.23791738  | 0.15265725 | 1.81660559  |     |
| FAM76B    | 0.23786092  | 0.15278657 | 1.81614869  |     |
| MRPL53    | 0.23784782  | 0.15280448 | 1.81604266  |     |
| DEF6      | -0.23782739 | 0.15284123 | -1.81587733 |     |
| INPP5F    | 0.23779155  | 0.15291764 | 1.81558725  |     |
| TMEM148   | -0.23774316 | 0.15301031 | -1.81519567 |     |
| AMD1      | 0.23771874  | 0.15301031 | 1.81499800  |     |
| APITD1    | 0.23772893  | 0.15301031 | 1.81508048  |     |
| C9orf53   | -0.23772409 | 0.15301031 | -1.81504132 |     |
| PTGS1     | -0.23774226 | 0.15301031 | -1.81518836 |     |
| MFAP5     | -0.23772535 | 0.15301031 | -1.81505156 |     |

|              |             |            |             |
|--------------|-------------|------------|-------------|
| LRRC10       | -0.23770543 | 0.15302878 | -1.81489032 |
| PRPSAP1      | 0.23769783  | 0.15303249 | 1.81482881  |
| BANF1        | -0.23769173 | 0.15303249 | -1.81477943 |
| DLEU2        | 0.23765475  | 0.15311188 | 1.81448023  |
| ZNF10        | 0.23762441  | 0.15317422 | 1.81423471  |
| GSK3A        | -0.23760315 | 0.15321318 | -1.81406268 |
| LOC100131720 | -0.23751861 | 0.15341523 | -1.81337866 |
| CTRL         | -0.23749665 | 0.15345606 | -1.81320093 |
| UCKL1        | -0.23748691 | 0.15346536 | -1.81312216 |
| ARFGAP1      | -0.23745190 | 0.15353983 | -1.81283893 |
| ADARB1       | -0.23741456 | 0.15355721 | -1.81253679 |
| FLJ32065     | 0.23741185  | 0.15355721 | 1.81251484  |
| GPI          | 0.23740227  | 0.15355721 | 1.81243735  |
| HNRNPU       | 0.23742644  | 0.15355721 | 1.81263291  |
| PPIC         | 0.23740300  | 0.15355721 | 1.81244329  |
| ERGIC1       | 0.23740721  | 0.15355721 | 1.81247735  |
| MOSPD3       | -0.23743866 | 0.15355721 | -1.81273177 |
| USP8         | 0.23736198  | 0.15364535 | 1.81211140  |
| PCMTD1       | 0.23734685  | 0.15366727 | 1.81198899  |
| SLC24A2      | -0.23734123 | 0.15366727 | -1.81194356 |
| RPH3AL       | -0.23733165 | 0.15367620 | -1.81186601 |
| C22orf31     | -0.23729899 | 0.15374422 | -1.81160179 |
| FAM181A      | -0.23729304 | 0.15374422 | -1.81155370 |
| TNC          | 0.23728046  | 0.15376090 | 1.81145188  |
| HKR1         | 0.23723769  | 0.15383970 | 1.81110595  |
| CUTC         | 0.23724126  | 0.15383970 | 1.81113479  |
| STX17        | 0.23720645  | 0.15388876 | 1.81085321  |
| C10orf2      | 0.23720661  | 0.15388876 | 1.81085446  |
| SNORA54      | -0.23718361 | 0.15393195 | -1.81066845 |
| ARFGAP3      | 0.23717404  | 0.15393457 | 1.81059106  |
| C1orf112     | 0.23717035  | 0.15393457 | 1.81056119  |
| CBX3         | 0.23712813  | 0.15401608 | 1.81021965  |
| DPPA4        | -0.23712656 | 0.15401608 | -1.81020701 |
| SEC61G       | 0.23710787  | 0.15404858 | 1.81005578  |
| SLC27A2      | 0.23709127  | 0.15407567 | 1.80992151  |
| GSTM2        | -0.23707390 | 0.15407684 | -1.80978105 |
| LOC100133421 | -0.23708025 | 0.15407684 | -1.80983241 |
| THRA         | -0.23707245 | 0.15407684 | -1.80976931 |
| hCG_1776007  | -0.23706253 | 0.15408666 | -1.80968907 |
| TUBA1C       | 0.23698454  | 0.15427257 | 1.80905824  |
| GPN3         | 0.23694367  | 0.15436252 | 1.80872768  |
| GNRHR2       | -0.23690613 | 0.15444387 | -1.80842409 |
| DNAJC19      | 0.23689950  | 0.15444519 | 1.80837047  |
| RUFY4        | -0.23689269 | 0.15444696 | -1.80831542 |
| FAM158A      | -0.23688592 | 0.15444865 | -1.80826066 |
| hCG_1732469  | -0.23684045 | 0.15455058 | -1.80789295 |
| FLJ31713     | -0.23681213 | 0.15456054 | -1.80766390 |
| GULP1        | 0.23681366  | 0.15456054 | 1.80767631  |
| FAM111A      | 0.23682199  | 0.15456054 | 1.80774370  |
| AAAS         | -0.23682960 | 0.15456054 | -1.80780521 |



|          |             |            |             |
|----------|-------------|------------|-------------|
| CCNO     | -0.23679367 | 0.15459252 | -1.80751463 |
| KY       | -0.23678614 | 0.15459618 | -1.80745374 |
| CXorf41  | 0.23674051  | 0.15469307 | 1.80708475  |
| SPOP     | 0.23673652  | 0.15469307 | 1.80705252  |
| SERPINB4 | 0.23671859  | 0.15472370 | 1.80690753  |
| RNF17    | -0.23669895 | 0.15475878 | -1.80674867 |
| CCDC41   | 0.23664012  | 0.15489553 | 1.80627296  |
| CHTF8    | 0.23661217  | 0.15495219 | 1.80604698  |
| ELSPBP1  | -0.23657806 | 0.15502485 | -1.80577122 |
| CAPS2    | 0.23656088  | 0.15505358 | 1.80563233  |
| TTC26    | 0.23650745  | 0.15517649 | 1.80520033  |
| DENND4C  | 0.23649404  | 0.15519545 | 1.80509190  |
| DYNC2H1  | 0.23646778  | 0.15524780 | 1.80487959  |
| GPR50    | -0.23645283 | 0.15527075 | -1.80475875 |
| LCE2B    | -0.23644384 | 0.15527606 | -1.80468603 |
| C3orf47  | -0.23643856 | 0.15527606 | -1.80464333 |
| ABCC4    | 0.23641068  | 0.15532255 | 1.80441798  |
| C17orf53 | -0.23640844 | 0.15532255 | -1.80439989 |
| COPG     | 0.23638737  | 0.15534555 | 1.80422950  |
| HIST1H4H | 0.23638859  | 0.15534555 | 1.80423933  |
| SDSL     | -0.23635101 | 0.15542422 | -1.80393555 |
| C17orf76 | -0.23633445 | 0.15545139 | -1.80380168 |
| TBC1D8   | 0.23630387  | 0.15551504 | 1.80355451  |
| C18orf21 | 0.23628831  | 0.15553963 | 1.80342870  |
| DNAJC10  | 0.23626264  | 0.15559053 | 1.80322121  |
| SNX10    | -0.23622856 | 0.15566336 | -1.80294569 |
| OPALIN   | -0.23615813 | 0.15583090 | -1.80237648 |
| CLCNKA   | -0.23607963 | 0.15601081 | -1.80174193 |
| CDC7     | 0.23607691  | 0.15601081 | 1.80171993  |
| EXOC6    | 0.23604718  | 0.15607241 | 1.80147971  |
| WDR88    | -0.23599932 | 0.15614945 | -1.80109286 |
| CDH26    | 0.23600963  | 0.15614945 | 1.80117623  |
| GPRIN2   | -0.23600533 | 0.15614945 | -1.80114141 |
| SLC17A5  | 0.23596982  | 0.15621050 | 1.80085444  |
| ZNF600   | 0.23596071  | 0.15621832 | 1.80078083  |
| DUXA     | -0.23593469 | 0.15627029 | -1.80057058 |
| HDDC2    | 0.23588188  | 0.15639228 | 1.80014380  |
| CAPZA2   | 0.23585297  | 0.15645187 | 1.79991015  |
| FLJ37078 | -0.23584258 | 0.15646306 | -1.79982615 |
| PGPEP1   | -0.23583050 | 0.15647865 | -1.79972855 |
| HRC      | -0.23581548 | 0.15650193 | -1.79960716 |
| POLR1D   | 0.23580768  | 0.15650632 | 1.79954419  |
| STX7     | 0.23576906  | 0.15659133 | 1.79923211  |
| ART3     | -0.23575605 | 0.15660937 | -1.79912700 |
| AKR1C1   | 0.23573809  | 0.15663927 | 1.79898188  |
| PELO     | 0.23572628  | 0.15663927 | 1.79888644  |
| CAMKK1   | -0.23573155 | 0.15663927 | -1.79892898 |
| CTSD     | 0.23568265  | 0.15673745 | 1.79853390  |
| ZNF808   | 0.23567409  | 0.15674385 | 1.79846475  |
| NDUFC1   | 0.23566086  | 0.15675268 | 1.79835779  |

|           |             |            |             |
|-----------|-------------|------------|-------------|
| HKDC1     | -0.23565849 | 0.15675268 | -1.79833871 |
| RFK       | 0.23554022  | 0.15704645 | 1.79738315  |
| OIT3      | -0.23552116 | 0.15708040 | -1.79722915 |
| RUNX1T1   | -0.23545504 | 0.15723777 | -1.79669498 |
| TEX9      | 0.23543177  | 0.15728280 | 1.79650695  |
| KLKP1     | -0.23542095 | 0.15729514 | -1.79641956 |
| COL4A6    | -0.23537586 | 0.15737055 | -1.79605528 |
| PMEPA1    | -0.23537388 | 0.15737055 | -1.79603932 |
| SGCD      | -0.23538468 | 0.15737055 | -1.79612660 |
| C6orf81   | -0.23535295 | 0.15737737 | -1.79587022 |
| FLJ36848  | -0.23535549 | 0.15737737 | -1.79589074 |
| LOC729566 | -0.23536123 | 0.15737737 | -1.79593710 |
| LAYN      | 0.23532328  | 0.15743088 | 1.79563060  |
| DUOX1     | 0.23530812  | 0.15743088 | 1.79550814  |
| TBCE      | 0.23531551  | 0.15743088 | 1.79556780  |
| KRTAP17-1 | -0.23530991 | 0.15743088 | -1.79552258 |
| XPO7      | 0.23529669  | 0.15744486 | 1.79541580  |
| ANGPTL7   | -0.23524530 | 0.15756378 | -1.79500071 |
| C21orf86  | -0.23521547 | 0.15761319 | -1.79475971 |
| TRIM23    | 0.23521428  | 0.15761319 | 1.79475010  |
| GMFB      | 0.23517475  | 0.15770103 | 1.79443080  |
| SCGBL     | -0.23514192 | 0.15775522 | -1.79416564 |
| MYOM1     | -0.23514307 | 0.15775522 | -1.79417497 |
| HAAO      | -0.23513382 | 0.15776045 | -1.79410027 |
| ZNF608    | 0.23506553  | 0.15792400 | 1.79354874  |
| SRP54     | 0.23505268  | 0.15793283 | 1.79344493  |
| TMEM107   | 0.23504996  | 0.15793283 | 1.79342299  |
| VRK3      | 0.23502957  | 0.15797043 | 1.79325828  |
| UBR2      | 0.23499964  | 0.15803313 | 1.79301658  |
| BACH2     | -0.23496450 | 0.15810958 | -1.79273280 |
| EIF2AK2   | 0.23494022  | 0.15812528 | 1.79253669  |
| ROBO1     | 0.23494633  | 0.15812528 | 1.79258605  |
| CSPP1     | 0.23494043  | 0.15812528 | 1.79253842  |
| WAS       | -0.23491573 | 0.15817368 | -1.79233898 |
| ZNF20     | 0.23488818  | 0.15823018 | 1.79211651  |
| ZNF304    | 0.23484270  | 0.15833396 | 1.79174923  |
| FLJ21075  | -0.23480528 | 0.15841651 | -1.79144710 |
| LOC400499 | -0.23472728 | 0.15860620 | -1.79081730 |
| NID1      | -0.23469127 | 0.15868517 | -1.79052649 |
| C5orf51   | 0.23468162  | 0.15869450 | 1.79044864  |
| PAXIP1    | 0.23466393  | 0.15872510 | 1.79030579  |
| LRRC34    | 0.23464863  | 0.15874938 | 1.79018225  |
| MAGEC1    | -0.23463496 | 0.15876936 | -1.79007187 |
| DHX16     | 0.23460187  | 0.15884064 | 1.78980474  |
| MYH4      | -0.23453652 | 0.15899726 | -1.78927713 |
| ZFP112    | 0.23452848  | 0.15900238 | 1.78921220  |
| VEZT      | 0.23448701  | 0.15909591 | 1.78887743  |
| GNL3      | 0.23446702  | 0.15913264 | 1.78871607  |
| DNAJC11   | 0.23443526  | 0.15920052 | 1.78845972  |
| CTAGE5    | 0.23441732  | 0.15923186 | 1.78831484  |

|              |             |            |             |     |
|--------------|-------------|------------|-------------|-----|
| LOC100130423 | 0.23427540  | 0.15959170 | 1.78716930  |     |
| C21orf66     | 0.23425560  | 0.15962802 | 1.78700947  |     |
| USPL1        | 0.23420918  | 0.15968757 | 1.78663481  |     |
| ING1         | -0.23421099 | 0.15968757 | -1.78664941 |     |
| GPR61        | -0.23419776 | 0.15968757 | -1.78654267 |     |
| KRIT1        | 0.23420733  | 0.15968757 | 1.78661993  |     |
| CCND3        | -0.23421191 | 0.15968757 | -1.78665683 |     |
| VAPB         | 0.23419650  | 0.15968757 | 1.78653246  |     |
| CH25H        | 0.23413283  | 0.15984032 | 1.78601861  |     |
| SNRPB2       | 0.23412273  | 0.15985091 | 1.78593713  |     |
| MED12L       | -0.23410172 | 0.15989048 | -1.78576757 |     |
| KRTAP10-8    | -0.23407142 | 0.15995474 | -1.78552301 |     |
| FN1          | -0.23404420 | 0.15996937 | -1.78530336 |     |
| HDAC2        | 0.23405362  | 0.15996937 | 1.78537932  |     |
| APOD         | -0.23405868 | 0.15996937 | -1.78542023 |     |
| MIP          | -0.23404149 | 0.15996937 | -1.78528143 |     |
| MGST2        | 0.23400806  | 0.16004195 | 1.78501168  |     |
| PIGA         | 0.23400031  | 0.16004632 | 1.78494914  |     |
| STRN3        | 0.23399221  | 0.16005162 | 1.78488378  |     |
| ITGA9        | -0.23396382 | 0.16011085 | -1.78465466 |     |
| C1orf50      | 0.23392548  | 0.16019653 | 1.78434529  |     |
| UPF1         | 0.23391108  | 0.16021860 | 1.78422906  |     |
| SRY          | -0.23389884 | 0.16023490 | -1.78413034 | yes |
| FAM49A       | -0.23389122 | 0.16023893 | -1.78406885 |     |
| CYB5B        | 0.23385377  | 0.16032232 | 1.78376661  |     |
| CEACAM16     | -0.23382892 | 0.16035593 | -1.78356618 |     |
| GNPTAB       | 0.23382952  | 0.16035593 | 1.78357100  |     |
| TMEM180      | -0.23381951 | 0.16036475 | -1.78349019 |     |
| C11orf70     | 0.23378576  | 0.16043831 | 1.78321790  |     |
| ZNF148       | 0.23377035  | 0.16046145 | 1.78309353  |     |
| ZNF341       | -0.23376486 | 0.16046145 | -1.78304929 |     |
| ZNF567       | 0.23373045  | 0.16053682 | 1.78277165  |     |
| ADAT3        | -0.23371950 | 0.16054836 | -1.78268327 |     |
| INTS4        | 0.23371391  | 0.16054836 | 1.78263820  |     |
| C17orf81     | 0.23370484  | 0.16055628 | 1.78256500  |     |
| C11orf49     | 0.23369516  | 0.16056580 | 1.78248693  |     |
| TMPRSS11D    | 0.23367334  | 0.16060768 | 1.78231083  |     |
| C1orf84      | -0.23364722 | 0.16066100 | -1.78210012 |     |
| MT1F         | -0.23361750 | 0.16072325 | -1.78186033 |     |
| SSB          | 0.23361165  | 0.16072325 | 1.78181320  |     |
| HSPB9        | -0.23359639 | 0.16074768 | -1.78169002 |     |
| FAM155B      | -0.23357613 | 0.16078540 | -1.78152664 |     |
| NAMPT        | -0.23356930 | 0.16078736 | -1.78147150 |     |
| PDLIM5       | 0.23350053  | 0.16095445 | 1.78091676  |     |
| ZNF584       | 0.23348170  | 0.16098843 | 1.78076482  |     |
| GPD1L        | 0.23341933  | 0.16113860 | 1.78026169  |     |
| SNORA36C     | -0.23339162 | 0.16116455 | -1.78003817 |     |
| RCC1         | -0.23338521 | 0.16116455 | -1.77998651 |     |
| CRKL         | 0.23339367  | 0.16116455 | 1.78005477  |     |
| XKR9         | -0.23338630 | 0.16116455 | -1.77999527 |     |

|           |             |            |             |
|-----------|-------------|------------|-------------|
| ANKRD62   | -0.23337385 | 0.16117859 | -1.77989490 |
| LDHAL6A   | -0.23328820 | 0.16138276 | -1.77920402 |
| SPRYD4    | 0.23328522  | 0.16138276 | 1.77918003  |
| RMND5B    | 0.23327339  | 0.16139808 | 1.77908462  |
| KLHL23    | -0.23323533 | 0.16147680 | -1.77877764 |
| RASAL2    | 0.23323175  | 0.16147680 | 1.77874872  |
| TLR2      | 0.23320778  | 0.16152458 | 1.77855543  |
| KRTAP10-4 | -0.23318732 | 0.16156298 | -1.77839045 |
| TTYT13    | -0.23317484 | 0.16158007 | -1.77828974 |
| COG1      | 0.23315151  | 0.16162617 | 1.77810160  |
| FIT1      | -0.23310156 | 0.16174351 | -1.77769880 |
| PON1      | -0.23308998 | 0.16175819 | -1.77760538 |
| HSD11B1   | -0.23306453 | 0.16179687 | -1.77740014 |
| LOC442075 | -0.23306334 | 0.16179687 | -1.77739055 |
| PHLDA3    | -0.23305423 | 0.16180495 | -1.77731706 |
| AFG3L2    | 0.23303565  | 0.16183837 | 1.77716724  |
| RAI14     | 0.23300369  | 0.16189726 | 1.77690955  |
| CDKL1     | 0.23300147  | 0.16189726 | 1.77689160  |
| WDR89     | 0.23298470  | 0.16191191 | 1.77675639  |
| AIM1      | 0.23298381  | 0.16191191 | 1.77674921  |
| NDUFA13   | -0.23295389 | 0.16197572 | -1.77650797 |
| C1orf52   | 0.23293235  | 0.16201711 | 1.77633427  |
| GCOM1     | -0.23291769 | 0.16204007 | -1.77621605 |
| CLEC1A    | -0.23288341 | 0.16211562 | -1.77593965 |
| COMMD6    | 0.23287080  | 0.16212643 | 1.77583802  |
| SNORD37   | 0.23286110  | 0.16212643 | 1.77575975  |
| OPN1SW    | -0.23286584 | 0.16212643 | -1.77579798 |
| JMJD1B    | 0.23285127  | 0.16213644 | 1.77568050  |
| C5orf53   | 0.23284394  | 0.16213975 | 1.77562142  |
| ALG10B    | 0.23281720  | 0.16219511 | 1.77540582  |
| ATP10D    | 0.23280286  | 0.16221724 | 1.77529019  |
| TPRX1     | -0.23278838 | 0.16223973 | -1.77517347 |
| FDX1L     | -0.23277021 | 0.16227183 | -1.77502697 |
| USF1      | 0.23276423  | 0.16227183 | 1.77497875  |
| TRDMT1    | 0.23273461  | 0.16232235 | 1.77473992  |
| C14orf166 | 0.23273322  | 0.16232235 | 1.77472873  |
| ZC3H3     | -0.23271395 | 0.16235542 | -1.77457338 |
| IAPP      | -0.23270872 | 0.16235542 | -1.77453116 |
| AMN       | -0.23265906 | 0.16247235 | -1.77413085 |
| RBPMS     | -0.23263984 | 0.16249125 | -1.77397590 |
| PRRX2     | -0.23264286 | 0.16249125 | -1.77400023 |
| MPHOSPH10 | 0.23261784  | 0.16253398 | 1.77379853  |
| CCR8      | -0.23260197 | 0.16254442 | -1.77367057 |
| CST2      | -0.23259569 | 0.16254442 | -1.77361994 |
| OR7G2     | -0.23260077 | 0.16254442 | -1.77366092 |
| ACAD9     | 0.23258423  | 0.16255883 | 1.77352762  |
| SSX7      | -0.23255845 | 0.16261172 | -1.77331979 |
| FAM58B    | -0.23252009 | 0.16269845 | -1.77301049 |
| TBC1D5    | 0.23250254  | 0.16272924 | 1.77286907  |
| CXorf36   | -0.23245864 | 0.16283090 | -1.77251516 |

|              |             |            |             |
|--------------|-------------|------------|-------------|
| TLCD2        | -0.23242594 | 0.16290246 | -1.77225159 |
| LEO1         | 0.23240616  | 0.16290654 | 1.77209218  |
| NDUFAB1      | 0.23241024  | 0.16290654 | 1.77212507  |
| VAR52        | -0.23241496 | 0.16290654 | -1.77216314 |
| LRGUK        | 0.23237147  | 0.16298348 | 1.77181259  |
| EDEM3        | 0.23235153  | 0.16302008 | 1.77165187  |
| AGPAT9       | 0.23234570  | 0.16302008 | 1.77160484  |
| PLK4         | 0.23233306  | 0.16303771 | 1.77150299  |
| GPR161       | -0.23230178 | 0.16308913 | -1.77125090 |
| BOLL         | -0.23230627 | 0.16308913 | -1.77128710 |
| FAM71D       | -0.23227450 | 0.16311370 | -1.77103097 |
| OR5AK2       | -0.23226852 | 0.16311370 | -1.77098284 |
| SNORD114-2   | -0.23226832 | 0.16311370 | -1.77098120 |
| LIPG         | -0.23227729 | 0.16311370 | -1.77105346 |
| MACROD1      | -0.23225120 | 0.16314341 | -1.77084324 |
| CPO          | -0.23223424 | 0.16316481 | -1.77070653 |
| PSG11        | -0.23223109 | 0.16316481 | -1.77068112 |
| C6orf125     | 0.23221597  | 0.16318914 | 1.77055929  |
| MCHR1        | -0.23219720 | 0.16322331 | -1.77040801 |
| TMEM75       | -0.23217915 | 0.16325553 | -1.77026256 |
| ZNF780B      | 0.23216014  | 0.16329035 | 1.77010938  |
| FAM82A1      | 0.23213413  | 0.16332765 | 1.76989977  |
| SSTR5        | -0.23213742 | 0.16332765 | -1.76992630 |
| FBXL13       | 0.23212232  | 0.16334310 | 1.76980458  |
| XRCC6BP1     | 0.23211187  | 0.16335487 | 1.76972038  |
| PAPSS2       | -0.23209855 | 0.16337437 | -1.76961305 |
| SNORD56B     | 0.23208337  | 0.16339891 | 1.76949069  |
| PCCA         | 0.23204509  | 0.16348570 | 1.76918219  |
| INHBC        | -0.23203713 | 0.16349076 | -1.76911809 |
| UGCGL1       | 0.23201849  | 0.16352462 | 1.76896789  |
| FAM168B      | 0.23200557  | 0.16352623 | 1.76886374  |
| KRTAP20-2    | -0.23201006 | 0.16352623 | -1.76889997 |
| PDE1B        | -0.23199966 | 0.16352623 | -1.76881618 |
| OSTCL        | -0.23199048 | 0.16353462 | -1.76874213 |
| GCNT2        | 0.23197880  | 0.16354972 | 1.76864804  |
| SRD5A2       | 0.23196542  | 0.16356942 | 1.76854022  |
| ANKIB1       | 0.23192578  | 0.16365991 | 1.76822088  |
| ZMYND19      | -0.23189138 | 0.16373634 | -1.76794365 |
| FAM183B      | -0.23187967 | 0.16375154 | -1.76784930 |
| OR5K1        | -0.23181885 | 0.16389930 | -1.76735932 |
| LRCH4        | -0.23178814 | 0.16396585 | -1.76711186 |
| XPOT         | 0.23176175  | 0.16400670 | 1.76689926  |
| ZC3H18       | -0.23176086 | 0.16400670 | -1.76689210 |
| KIAA1199     | 0.23175234  | 0.16401331 | 1.76682344  |
| LOC100133393 | -0.23172075 | 0.16407293 | -1.76656893 |
| FAM86A       | -0.23171813 | 0.16407293 | -1.76654781 |
| CTCFL        | -0.23169106 | 0.16412966 | -1.76632974 |
| SNORD115-48  | -0.23167818 | 0.16414806 | -1.76622596 |
| HTR2A        | -0.23166716 | 0.16416144 | -1.76613717 |
| IFNA2        | -0.23164816 | 0.16419638 | -1.76598412 |

|              |             |            |             |     |
|--------------|-------------|------------|-------------|-----|
| PNLDC1       | -0.23163407 | 0.16420162 | -1.76587064 |     |
| CENPP        | -0.23163877 | 0.16420162 | -1.76590849 |     |
| LOC100130924 | -0.23162155 | 0.16421904 | -1.76576982 |     |
| WNK1         | 0.23157839  | 0.16431934 | 1.76542213  |     |
| PRRG1        | -0.23154271 | 0.16438301 | -1.76513473 |     |
| ZBTB4        | -0.23154549 | 0.16438301 | -1.76515709 |     |
| FAM5C        | -0.23152831 | 0.16440556 | -1.76501868 |     |
| C5orf20      | -0.23151832 | 0.16441615 | -1.76493824 |     |
| KLHL11       | 0.23147823  | 0.16450822 | 1.76461533  |     |
| RNF24        | 0.23144517  | 0.16457061 | 1.76434905  |     |
| UCP3         | -0.23144305 | 0.16457061 | -1.76433190 |     |
| C15orf53     | -0.23142411 | 0.16460544 | -1.76417941 |     |
| FBXL8        | -0.23139442 | 0.16466941 | -1.76394027 |     |
| TNRC18       | -0.23137179 | 0.16471427 | -1.76375801 |     |
| CCDC85C      | -0.23135231 | 0.16475061 | -1.76360109 |     |
| TGM2         | 0.23134399  | 0.16475672 | 1.76353405  |     |
| FLJ35220     | -0.23132580 | 0.16478955 | -1.76338758 |     |
| DCT          | -0.23127515 | 0.16489395 | -1.76297965 |     |
| FAM124A      | -0.23128045 | 0.16489395 | -1.76302234 |     |
| C11orf60     | 0.23121648  | 0.16503662 | 1.76250716  |     |
| LRRTM2       | -0.23120026 | 0.16506416 | -1.76237655 |     |
| ARL6IP5      | 0.23117302  | 0.16512162 | 1.76215716  |     |
| C15orf27     | -0.23112526 | 0.16523482 | -1.76177252 |     |
| C3orf30      | -0.23110411 | 0.16527577 | -1.76160220 |     |
| LRRC41       | 0.23106374  | 0.16535244 | 1.76127718  |     |
| NENF         | -0.23106470 | 0.16535244 | -1.76128490 | yes |
| EPCAM        | 0.23104706  | 0.16538129 | 1.76114281  |     |
| SVOPL        | 0.23100879  | 0.16546880 | 1.76083468  |     |
| FLYWCH1      | -0.23098831 | 0.16549145 | -1.76066982 |     |
| ORAI3        | -0.23098924 | 0.16549145 | -1.76067725 |     |
| GHRHR        | -0.23097733 | 0.16550482 | -1.76058135 |     |
| CCDC141      | -0.23097065 | 0.16550649 | -1.76052755 | yes |
| TRY6         | -0.23093765 | 0.16555762 | -1.76026185 |     |
| ARID4A       | 0.23093363  | 0.16555762 | 1.76022954  |     |
| KIAA0753     | 0.23094060  | 0.16555762 | 1.76028565  |     |
| TUBA3C       | -0.23092104 | 0.16557538 | -1.76012812 |     |
| CLEC4C       | -0.23090779 | 0.16559491 | -1.76002145 |     |
| A3GALT2      | -0.23089402 | 0.16561586 | -1.75991056 |     |
| DDR2         | -0.23088201 | 0.16563201 | -1.75981393 |     |
| OR8G1        | -0.23087103 | 0.16564538 | -1.75972548 |     |
| MMGT1        | 0.23086496  | 0.16564538 | 1.75967666  |     |
| GYP A        | -0.23081338 | 0.16576924 | -1.75926133 |     |
| TMEM141      | -0.23079659 | 0.16579841 | -1.75912618 |     |
| ACSL4        | 0.23072420  | 0.16593454 | 1.75854336  |     |
| JMJD1C       | 0.23072249  | 0.16593454 | 1.75852965  |     |
| PGM3         | 0.23072715  | 0.16593454 | 1.75856716  |     |
| BMP5         | -0.23072233 | 0.16593454 | -1.75852833 |     |
| SCNN1B       | 0.23067994  | 0.16603350 | 1.75818707  |     |
| MAP3K7IP1    | -0.23064068 | 0.16610004 | -1.75787100 |     |
| LARS         | 0.23064785  | 0.16610004 | 1.75792875  |     |

|           |             |            |             |     |
|-----------|-------------|------------|-------------|-----|
| SLTM      | 0.23063732  | 0.16610004 | 1.75784402  |     |
| CADM3     | -0.23062748 | 0.16611035 | -1.75776475 |     |
| MSMB      | 0.23059395  | 0.16618123 | 1.75749484  |     |
| PUS3      | 0.23058935  | 0.16618123 | 1.75745782  |     |
| PLEKHM3   | 0.23057456  | 0.16620502 | 1.75733877  |     |
| MAN1C1    | -0.23055423 | 0.16624390 | -1.75717519 |     |
| COX18     | 0.23054016  | 0.16626575 | 1.75706187  |     |
| CAMK2D    | 0.23050945  | 0.16633298 | 1.75681466  |     |
| ZMAT2     | 0.23047790  | 0.16640252 | 1.75656072  |     |
| SNORD50A  | -0.23037388 | 0.16663684 | -1.75572353 |     |
| SAR1P3    | -0.23038525 | 0.16663684 | -1.75581507 |     |
| SLC5A4    | -0.23037658 | 0.16663684 | -1.75574528 |     |
| PECAM1    | -0.23035091 | 0.16668302 | -1.75553868 |     |
| C3orf65   | -0.23034157 | 0.16669198 | -1.75546349 |     |
| PLDN      | 0.23031417  | 0.16675028 | 1.75524299  |     |
| DNAJC8    | 0.23030239  | 0.16676591 | 1.75514817  |     |
| C3orf57   | 0.23028533  | 0.16679597 | 1.75501086  |     |
| MRPS36    | 0.23027016  | 0.16682087 | 1.75488878  |     |
| CCL4      | 0.23023718  | 0.16689447 | 1.75462335  |     |
| SIRPB2    | -0.23016734 | 0.16705429 | -1.75406132 |     |
| NEFM      | -0.23016663 | 0.16705429 | -1.75405563 |     |
| DYDC2     | 0.23011820  | 0.16713803 | 1.75366592  |     |
| MYLK2     | -0.23012862 | 0.16713803 | -1.75374981 |     |
| WDR1      | 0.23011784  | 0.16713803 | 1.75366305  |     |
| MMP17     | -0.23010092 | 0.16716775 | -1.75352692 |     |
| HN1L      | 0.23008204  | 0.16720285 | 1.75337498  |     |
| LOC401233 | -0.23002388 | 0.16734556 | -1.75290698 |     |
| SCLY      | -0.22999316 | 0.16741312 | -1.75265981 |     |
| CLCC1     | 0.22995978  | 0.16748801 | 1.75239123  |     |
| SSX3      | -0.22992229 | 0.16755265 | -1.75208955 |     |
| HTR1D     | -0.22991802 | 0.16755265 | -1.75205523 |     |
| AARSD1    | -0.22991826 | 0.16755265 | -1.75205713 |     |
| C12orf37  | -0.22986266 | 0.16768789 | -1.75160982 |     |
| PSMB5     | 0.22985509  | 0.16769203 | 1.75154892  |     |
| RPGRIP1L  | 0.22982324  | 0.16776280 | 1.75129266  |     |
| SOS2      | 0.22979051  | 0.16783600 | 1.75102939  |     |
| FIP1L1    | 0.22977338  | 0.16786640 | 1.75089155  |     |
| BFSP2     | -0.22975527 | 0.16789948 | -1.75074590 |     |
| GZMH      | -0.22973511 | 0.16793820 | -1.75058372 |     |
| OSBPL2    | 0.22967757  | 0.16807965 | 1.75012084  |     |
| LOC442245 | -0.22964928 | 0.16814077 | -1.74989324 |     |
| SLC30A3   | -0.22963019 | 0.16815992 | -1.74973970 |     |
| CBR3      | -0.22963266 | 0.16815992 | -1.74975958 |     |
| PTGR1     | 0.22960060  | 0.16820734 | 1.74950164  | yes |
| OR8H2     | -0.22959725 | 0.16820734 | -1.74947475 |     |
| TTC30A    | 0.22959476  | 0.16820734 | 1.74945473  |     |
| LGALS3BP  | 0.22958202  | 0.16822573 | 1.74935221  |     |
| C6orf224  | 0.22956865  | 0.16823165 | 1.74924469  |     |
| GOLGB1    | 0.22956775  | 0.16823165 | 1.74923741  |     |
| ARID5A    | -0.22955241 | 0.16825716 | -1.74911408 |     |

|             |             |            |             |     |
|-------------|-------------|------------|-------------|-----|
| BARD1       | 0.22953715  | 0.16828247 | 1.74899132  |     |
| DDX53       | -0.22949242 | 0.16838887 | -1.74863153 |     |
| MATK        | -0.22946902 | 0.16843659 | -1.74844335 |     |
| C2orf44     | 0.22939602  | 0.16862093 | 1.74785616  |     |
| WNT5A       | 0.22935795  | 0.16870911 | 1.74755004  |     |
| C9orf86     | -0.22934751 | 0.16872119 | -1.74746605 |     |
| USP47       | 0.22932302  | 0.16877198 | 1.74726912  |     |
| SYPL1       | 0.22930759  | 0.16879782 | 1.74714503  |     |
| OR10H1      | -0.22928464 | 0.16884439 | -1.74696045 |     |
| CCNI        | 0.22927378  | 0.16885763 | 1.74687312  |     |
| ARPC1A      | 0.22923028  | 0.16890664 | 1.74652328  |     |
| DAO         | -0.22923564 | 0.16890664 | -1.74656637 |     |
| SNORA71A    | -0.22923590 | 0.16890664 | -1.74656853 |     |
| BAGE4       | -0.22923680 | 0.16890664 | -1.74657570 |     |
| CLCA3P      | -0.22922572 | 0.16890664 | -1.74648665 |     |
| KRTAP5-9    | -0.22918473 | 0.16898629 | -1.74615703 |     |
| TOMM5       | 0.22918615  | 0.16898629 | 1.74616844  |     |
| MAP1LC3B2   | -0.22917542 | 0.16899528 | -1.74608215 |     |
| TM4SF19     | -0.22915435 | 0.16903672 | -1.74591268 |     |
| GFPT1       | 0.22910491  | 0.16913965 | 1.74551519  |     |
| C11orf92    | 0.22909551  | 0.16913965 | 1.74543961  |     |
| OR5B3       | -0.22909818 | 0.16913965 | -1.74546102 |     |
| CIP29       | -0.22909283 | 0.16913965 | -1.74541802 |     |
| STAU2       | 0.22903685  | 0.16924578 | 1.74496794  |     |
| XKR6        | -0.22903623 | 0.16924578 | -1.74496289 | yes |
| YWHAZ       | 0.22904063  | 0.16924578 | 1.74499828  |     |
| C17orf46    | -0.22901084 | 0.16929917 | -1.74475879 |     |
| DEFB111     | -0.22896533 | 0.16940818 | -1.74439285 |     |
| ITPKA       | -0.22895751 | 0.16941306 | -1.74432999 |     |
| CYP2D6      | -0.22894722 | 0.16942476 | -1.74424730 |     |
| SNORD116-18 | -0.22892990 | 0.16943917 | -1.74410803 |     |
| LOC654342   | -0.22893212 | 0.16943917 | -1.74412582 |     |
| PPME1       | 0.22889699  | 0.16951342 | 1.74384341  |     |
| CLTCL1      | -0.22886044 | 0.16959773 | -1.74354960 | yes |
| DSE         | 0.22883756  | 0.16964427 | 1.74336566  |     |
| GTF2A1L     | -0.22881957 | 0.16965532 | -1.74322100 |     |
| STT3B       | 0.22881871  | 0.16965532 | 1.74321409  |     |
| LINGO1      | -0.22881541 | 0.16965532 | -1.74318759 |     |
| TCF7        | -0.22879768 | 0.16967398 | -1.74304499 |     |
| CCNE1       | -0.22879657 | 0.16967398 | -1.74303608 |     |
| CNOT4       | 0.22878852  | 0.16967950 | 1.74297139  |     |
| MAK16       | 0.22877333  | 0.16970479 | 1.74284926  |     |
| DDX41       | 0.22875259  | 0.16974542 | 1.74268258  |     |
| STARD6      | -0.22872387 | 0.16980817 | -1.74245168 |     |
| GJA5        | -0.22870663 | 0.16983913 | -1.74231310 |     |
| TRAK2       | 0.22867785  | 0.16988531 | 1.74208177  |     |
| MXD3        | -0.22868096 | 0.16988531 | -1.74210672 |     |
| C17orf28    | -0.22860312 | 0.17005879 | -1.74148101 |     |
| IRG1        | -0.22860624 | 0.17005879 | -1.74150610 |     |
| TMEM205     | 0.22857194  | 0.17012842 | 1.74123040  |     |



|           |             |            |             |
|-----------|-------------|------------|-------------|
| HDGFL1    | -0.22852784 | 0.17023388 | -1.74087599 |
| TXN       | 0.22851282  | 0.17025876 | 1.74075523  |
| RAB37     | 0.22849584  | 0.17028907 | 1.74061876  |
| UQCRFS1   | -0.22847237 | 0.17033739 | -1.74043013 |
| RBAK      | 0.22844591  | 0.17039400 | 1.74021750  |
| C6orf150  | 0.22843290  | 0.17041333 | 1.74011289  |
| ATF6      | 0.22842001  | 0.17041551 | 1.74000935  |
| APP       | 0.22842117  | 0.17041551 | 1.74001865  |
| GNA14     | 0.22835096  | 0.17059041 | 1.73945434  |
| ZBTB6     | 0.22831240  | 0.17068068 | 1.73914451  |
| AHSA1     | 0.22828956  | 0.17071054 | 1.73896093  |
| OR1F1     | -0.22829553 | 0.17071054 | -1.73900888 |
| SCAMP1    | 0.22827822  | 0.17072523 | 1.73886982  |
| SEC24A    | 0.22826324  | 0.17075005 | 1.73874944  |
| PPM1M     | -0.22822720 | 0.17078752 | -1.73845982 |
| ERN1      | -0.22823384 | 0.17078752 | -1.73851320 |
| KRTAP19-3 | -0.22823020 | 0.17078752 | -1.73848396 |
| PODXL     | -0.22822557 | 0.17078752 | -1.73844672 |
| SMC4      | 0.22817797  | 0.17085078 | 1.73806422  |
| SLC5A9    | -0.22817255 | 0.17085078 | -1.73802064 |
| TMOD4     | -0.22816654 | 0.17085078 | -1.73797236 |
| MLLT1     | -0.22817985 | 0.17085078 | -1.73807933 |
| MYOZ3     | -0.22817269 | 0.17085078 | -1.73802180 |
| MTSS1     | 0.22816672  | 0.17085078 | 1.73797383  |
| GNG11     | -0.22813853 | 0.17089504 | -1.73774728 |
| MSC       | -0.22814299 | 0.17089504 | -1.73778315 |
| MAGEA10   | -0.22809351 | 0.17097511 | -1.73738557 |
| ZNF771    | -0.22810121 | 0.17097511 | -1.73744742 |
| SNORD75   | 0.22809160  | 0.17097511 | 1.73737023  |
| ISL1      | 0.22807535  | 0.17100349 | 1.73723965  |
| OR2T8     | -0.22805920 | 0.17103160 | -1.73710989 |
| LAMB4     | -0.22802325 | 0.17111060 | -1.73682108 |
| MAD1L1    | -0.22801872 | 0.17111060 | -1.73678460 |
| ZNF329    | 0.22799638  | 0.17115594 | 1.73660514  |
| ARMC3     | 0.22797578  | 0.17116797 | 1.73643961  |
| STEAP1    | 0.22796802  | 0.17116797 | 1.73637732  |
| BBS2      | 0.22797891  | 0.17116797 | 1.73646476  |
| OR6N2     | -0.22796790 | 0.17116797 | -1.73637630 |
| LOC645188 | -0.22795671 | 0.17118229 | -1.73628643 |
| CYSLTR2   | -0.22793817 | 0.17118668 | -1.73613751 |
| ZNF214    | 0.22793872  | 0.17118668 | 1.73614190  |
| ZNF215    | 0.22793702  | 0.17118668 | 1.73612823  |
| RPL36AP46 | -0.22792536 | 0.17120233 | -1.73603453 |
| LIPF      | -0.22790783 | 0.17123431 | -1.73589369 |
| C10orf47  | -0.22789295 | 0.17125892 | -1.73577414 |
| LOC646976 | -0.22781619 | 0.17142890 | -1.73515749 |
| NHEJ1     | 0.22781378  | 0.17142890 | 1.73513818  |
| IGFN1     | -0.22782503 | 0.17142890 | -1.73522849 |
| NDNL2     | -0.22779773 | 0.17145681 | -1.73500919 |
| C22orf34  | -0.22777412 | 0.17150574 | -1.73481959 |

|              |             |            |             |
|--------------|-------------|------------|-------------|
| C9orf80      | 0.22774202  | 0.17154134 | 1.73456168  |
| RBP2         | -0.22774865 | 0.17154134 | -1.73461496 |
| RFXAP        | 0.22774415  | 0.17154134 | 1.73457879  |
| C20orf149    | -0.22773720 | 0.17154134 | -1.73452301 |
| GPR81        | -0.22772307 | 0.17156391 | -1.73440947 |
| SLC16A11     | -0.22771449 | 0.17157101 | -1.73434052 |
| C14orf177    | -0.22769004 | 0.17160551 | -1.73414415 |
| TMEM202      | -0.22769157 | 0.17160551 | -1.73415646 |
| LOC100131888 | 0.22767646  | 0.17160920 | 1.73403507  |
| NFIB         | -0.22767443 | 0.17160920 | -1.73401876 |
| ADAM7        | -0.22767062 | 0.17160920 | -1.73398812 |
| CA6          | -0.22765192 | 0.17164450 | -1.73383793 |
| PTAFR        | 0.22763112  | 0.17168565 | 1.73367091  |
| RARA         | -0.22761585 | 0.17171140 | -1.73354825 |
| CYP21A2      | -0.22759252 | 0.17173457 | -1.73336085 |
| OLFML2B      | -0.22759732 | 0.17173457 | -1.73339935 |
| BPGM         | 0.22758945  | 0.17173457 | 1.73333618  |
| ABCF2        | 0.22752849  | 0.17176914 | 1.73284652  |
| DGKB         | -0.22756868 | 0.17176914 | -1.73316934 |
| CYFIP1       | 0.22752684  | 0.17176914 | 1.73283329  |
| OR10J1       | -0.22752440 | 0.17176914 | -1.73281366 |
| PPP1CA       | 0.22751677  | 0.17176914 | 1.73275243  |
| MAP4K2       | -0.22756358 | 0.17176914 | -1.73312839 |
| PBOV1        | -0.22754128 | 0.17176914 | -1.73294923 |
| APOBEC3G     | 0.22752351  | 0.17176914 | 1.73280654  |
| IL1R2        | 0.22753965  | 0.17176914 | 1.73293615  |
| KIAA1715     | 0.22752049  | 0.17176914 | 1.73278226  |
| SGPP1        | -0.22746159 | 0.17190623 | -1.73230919 |
| ATP1B3       | 0.22742176  | 0.17200051 | 1.73198938  |
| PDIA5        | -0.22741254 | 0.17200944 | -1.73191529 |
| SLC25A17     | 0.22739891  | 0.17203065 | 1.73180587  |
| CYP3A5       | 0.22737895  | 0.17204300 | 1.73164554  |
| OR52D1       | -0.22737039 | 0.17204300 | -1.73157677 |
| SLAIN2       | 0.22738455  | 0.17204300 | 1.73169050  |
| LOC645181    | -0.22737606 | 0.17204300 | -1.73162233 |
| PIR          | 0.22732581  | 0.17215061 | 1.73121881  |
| TUBB1        | -0.22729018 | 0.17223328 | -1.73093269 |
| PNRC1        | 0.22727589  | 0.17223955 | 1.73081791  |
| C17orf90     | -0.22727962 | 0.17223955 | -1.73084787 |
| BXDC2        | 0.22724422  | 0.17231119 | 1.73056359  |
| WNK3         | -0.22722091 | 0.17235950 | -1.73037638 |
| SLC22A3      | -0.22714534 | 0.17253706 | -1.72976960 |
| MAP3K12      | -0.22714641 | 0.17253706 | -1.72977817 |
| TTL          | 0.22697016  | 0.17300609 | 1.72836307  |
| WIBG         | -0.22696574 | 0.17300609 | -1.72832760 |
| CSRP1        | -0.22695072 | 0.17303130 | -1.72820701 |
| CST6         | -0.22691344 | 0.17310202 | -1.72790767 |
| ARGLU1       | 0.22691553  | 0.17310202 | 1.72792448  |
| DNAL1        | 0.22690166  | 0.17311815 | 1.72781313  |
| SBSN         | -0.22687775 | 0.17316828 | -1.72762120 |

|           |             |            |             |
|-----------|-------------|------------|-------------|
| PTPRR     | -0.22685121 | 0.17322583 | -1.72740809 |
| RPS6KA4   | -0.22684173 | 0.17323551 | -1.72733202 |
| LDB2      | -0.22676403 | 0.17343663 | -1.72670828 |
| SLC16A3   | 0.22675571  | 0.17344307 | 1.72664150  |
| HIGD1D    | -0.22673542 | 0.17344928 | -1.72647865 |
| NLRP11    | -0.22674608 | 0.17344928 | -1.72656417 |
| KIF17     | -0.22673996 | 0.17344928 | -1.72651505 |
| XPO6      | 0.22668934  | 0.17351216 | 1.72610872  |
| DBNL      | 0.22668893  | 0.17351216 | 1.72610543  |
| UBE2Z     | 0.22670588  | 0.17351216 | 1.72624150  |
| UBE2M     | -0.22669050 | 0.17351216 | -1.72611803 |
| NCAPG2    | 0.22667937  | 0.17351772 | 1.72602871  |
| ZNF673    | 0.22667491  | 0.17351772 | 1.72599287  |
| GNPNAT1   | 0.22666286  | 0.17353462 | 1.72589620  |
| WDR35     | 0.22664486  | 0.17356825 | 1.72575173  |
| SUSD4     | 0.22658755  | 0.17371233 | 1.72529173  |
| KCNMB4    | -0.22656595 | 0.17375395 | -1.72511832 |
| PPAPDC2   | 0.22656070  | 0.17375395 | 1.72507619  |
| AEBP1     | -0.22655420 | 0.17375530 | -1.72502399 |
| RGNEF     | 0.22650401  | 0.17387945 | 1.72462121  |
| MUC5B     | -0.22647704 | 0.17393837 | -1.72440474 |
| ACBD3     | 0.22646348  | 0.17395956 | 1.72429593  |
| TMEM204   | -0.22644674 | 0.17398972 | -1.72416156 |
| RPA2      | 0.22639984  | 0.17410473 | 1.72378522  |
| NOP56     | 0.22639270  | 0.17410790 | 1.72372785  |
| TRIM29    | 0.22634580  | 0.17422299 | 1.72335147  |
| C1orf201  | 0.22633302  | 0.17424201 | 1.72324894  |
| C5orf23   | -0.22632644 | 0.17424357 | -1.72319616 |
| SPIN1     | 0.22631303  | 0.17426440 | 1.72308849  |
| GRIK3     | -0.22628479 | 0.17431054 | -1.72286194 |
| MTR       | 0.22628460  | 0.17431054 | 1.72286042  |
| GNG3      | -0.22627256 | 0.17432751 | -1.72276377 |
| RPL31     | 0.22626182  | 0.17434080 | 1.72267759  |
| SNX12     | 0.22624235  | 0.17435406 | 1.72252137  |
| LOC339742 | -0.22624304 | 0.17435406 | -1.72252688 |
| GOS2      | -0.22623906 | 0.17435406 | -1.72249494 |
| PROSC     | 0.22620796  | 0.17442472 | 1.72224539  |
| RPLP0     | 0.22618746  | 0.17446552 | 1.72208093  |
| LIPE      | -0.22611868 | 0.17464248 | -1.72152901 |
| RBP5      | -0.22608825 | 0.17471133 | -1.72128488 |
| UBE2D2    | 0.22607845  | 0.17472200 | 1.72120624  |
| FAM116A   | 0.22604644  | 0.17479535 | 1.72094940  |
| SF3B1     | 0.22603275  | 0.17481698 | 1.72083961  |
| EPM2AIP1  | 0.22596726  | 0.17498489 | 1.72031419  |
| IQCK      | 0.22592873  | 0.17504928 | 1.72000508  |
| RPRD2     | 0.22592641  | 0.17504928 | 1.71998646  |
| BMS1      | 0.22593529  | 0.17504928 | 1.72005771  |
| ARMCX1    | -0.22590869 | 0.17506584 | -1.71984424 |
| KIRREL    | -0.22590852 | 0.17506584 | -1.71984288 |
| FRS2      | 0.22583288  | 0.17524559 | 1.71923612  |

|              |             |            |             |
|--------------|-------------|------------|-------------|
| SPIN2A       | -0.22583794 | 0.17524559 | -1.71927669 |
| SH3TC2       | -0.22582498 | 0.17525092 | -1.71917271 |
| SPANXN4      | -0.22581302 | 0.17526771 | -1.71907681 |
| SYCP2        | 0.22578987  | 0.17531617 | 1.71889107  |
| SPATA2       | -0.22576103 | 0.17538072 | -1.71865972 |
| OR52E6       | -0.22571992 | 0.17548000 | -1.71833000 |
| KRTAP21-2    | -0.22565653 | 0.17564242 | -1.71782153 |
| DFNB31       | -0.22563261 | 0.17569314 | -1.71762963 |
| ZNF330       | 0.22561887  | 0.17571499 | 1.71751947  |
| CSPG4        | -0.22559164 | 0.17577510 | -1.71730104 |
| LOC100130138 | -0.22558252 | 0.17578388 | -1.71722793 |
| CACNA1B      | -0.22553610 | 0.17589840 | -1.71685557 |
| LOC730167    | -0.22549874 | 0.17598727 | -1.71655594 |
| PTGIS        | -0.22548439 | 0.17601090 | -1.71644084 |
| CNIH2        | -0.22546385 | 0.17605209 | -1.71627613 |
| ZHX2         | -0.22545403 | 0.17606286 | -1.71619741 |
| ATG4C        | 0.22542796  | 0.17611976 | 1.71598830  |
| CIDEC        | -0.22541621 | 0.17613603 | -1.71589408 |
| TRIM66       | -0.22536925 | 0.17625223 | -1.71551750 |
| SNORD29      | 0.22536225  | 0.17625502 | 1.71546136  |
| CDCP2        | -0.22534312 | 0.17629226 | -1.71530791 |
| ATP2B4       | 0.22525792  | 0.17651719 | 1.71462471  |
| VPS13B       | 0.22523759  | 0.17655787 | 1.71446168  |
| LOC255411    | -0.22520606 | 0.17663040 | -1.71420887 |
| LRR67        | 0.22517750  | 0.17669450 | 1.71397986  |
| PKIB         | 0.22516518  | 0.17671242 | 1.71388111  |
| GIPC3        | -0.22511580 | 0.17682254 | -1.71348519 |
| AGXT         | -0.22511444 | 0.17682254 | -1.71347424 |
| LAIR2        | -0.22509099 | 0.17687215 | -1.71328623 |
| SGK2         | -0.22499886 | 0.17706593 | -1.71254760 |
| LPAR3        | 0.22499976  | 0.17706593 | 1.71255477  |
| PAQR5        | -0.22501395 | 0.17706593 | -1.71266858 |
| FHL5         | -0.22500085 | 0.17706593 | -1.71256356 |
| SPSB1        | 0.22494916  | 0.17719040 | 1.71214910  |
| OMP          | -0.22493607 | 0.17721054 | -1.71204421 |
| DZIP3        | 0.22492562  | 0.17722317 | 1.71196044  |
| SYS1         | 0.22491398  | 0.17723920 | 1.71186713  |
| RIMKLB       | 0.22487893  | 0.17732197 | 1.71158613  |
| IVD          | 0.22483284  | 0.17743624 | 1.71121668  |
| IGF2BP1      | -0.22480532 | 0.17749761 | -1.71099601 |
| MSRB2        | 0.22478156  | 0.17754823 | 1.71080558  |
| LYZL1        | -0.22476315 | 0.17758360 | -1.71065802 |
| FUT8         | 0.22474664  | 0.17759637 | 1.71052570  |
| HIPK2        | 0.22474821  | 0.17759637 | 1.71053824  |
| BHLHE40      | 0.22473540  | 0.17761129 | 1.71043559  |
| GPR107       | 0.22469030  | 0.17772288 | 1.71007409  |
| PCNA         | 0.22466478  | 0.17777860 | 1.70986949  |
| DDX59        | 0.22463114  | 0.17784033 | 1.70959984  |
| SLC25A14     | 0.22463507  | 0.17784033 | 1.70963140  |
| MATN3        | -0.22459377 | 0.17791595 | -1.70930039 |

|           |             |            |             |     |
|-----------|-------------|------------|-------------|-----|
| AKR1C3    | 0.22459264  | 0.17791595 | 1.70929133  |     |
| PROZ      | -0.22457306 | 0.17795474 | -1.70913434 |     |
| OR5C1     | -0.22456696 | 0.17795496 | -1.70908551 |     |
| C17orf78  | -0.22456077 | 0.17795546 | -1.70903591 |     |
| PHYHIP    | -0.22453409 | 0.17801454 | -1.70882206 |     |
| SNORD8    | -0.22452107 | 0.17803457 | -1.70871771 |     |
| TUSC3     | 0.22445580  | 0.17820405 | 1.70819461  |     |
| LRRC33    | -0.22440120 | 0.17834309 | -1.70775707 |     |
| ARL3      | 0.22439486  | 0.17834404 | 1.70770619  |     |
| EPB41L1   | 0.22435453  | 0.17844229 | 1.70738301  |     |
| CTH       | -0.22427768 | 0.17864523 | -1.70676724 |     |
| THAP5     | 0.22420728  | 0.17881260 | 1.70620309  |     |
| ZFPM2     | -0.22421040 | 0.17881260 | -1.70622806 |     |
| C8orf77   | -0.22416898 | 0.17890521 | -1.70589623 |     |
| CLIC5     | 0.22415173  | 0.17893747 | 1.70575796  |     |
| OR4C13    | -0.22411947 | 0.17899551 | -1.70549954 |     |
| LDHA      | 0.22412347  | 0.17899551 | 1.70553153  |     |
| LIMS1     | 0.22410195  | 0.17901286 | 1.70535918  |     |
| FRMPD3    | -0.22410140 | 0.17901286 | -1.70535470 |     |
| CD19      | -0.22409262 | 0.17902078 | -1.70528442 |     |
| C19orf42  | 0.22408481  | 0.17902594 | 1.70522181  |     |
| C14orf145 | 0.22401853  | 0.17918528 | 1.70469077  |     |
| ODF3L1    | -0.22401729 | 0.17918528 | -1.70468087 |     |
| OR5P3     | -0.22392979 | 0.17941945 | -1.70397988 |     |
| CCDC52    | 0.22389724  | 0.17949577 | 1.70371908  |     |
| FAM10A4   | -0.22388923 | 0.17950150 | -1.70365492 |     |
| CNGB3     | -0.22378547 | 0.17978279 | -1.70282376 |     |
| MBOAT2    | 0.22377044  | 0.17980876 | 1.70270332  |     |
| CCDC56    | 0.22368984  | 0.18002363 | 1.70205778  |     |
| KPNA2     | 0.22364432  | 0.18013752 | 1.70169318  |     |
| FLJ22167  | 0.22359775  | 0.18025449 | 1.70132019  |     |
| TOMM34    | 0.22358716  | 0.18026768 | 1.70123536  | yes |
| ITFG2     | 0.22356846  | 0.18030430 | 1.70108553  |     |
| SLIT3     | -0.22355791 | 0.18031437 | -1.70100110 |     |
| ALG8      | 0.22355293  | 0.18031437 | 1.70096118  |     |
| TSPYL1    | 0.22354037  | 0.18033327 | 1.70086056  |     |
| KRT12     | -0.22348191 | 0.18048465 | -1.70039238 |     |
| PADI6     | -0.22343363 | 0.18060671 | -1.70000578 |     |
| MTDH      | 0.22340774  | 0.18066141 | 1.69979838  |     |
| ARHGEF10  | -0.22340267 | 0.18066141 | -1.69975780 |     |
| NFRKB     | 0.22335453  | 0.18078316 | 1.69937229  |     |
| NXF3      | -0.22334240 | 0.18080083 | -1.69927518 |     |
| NAT2      | -0.22332343 | 0.18083828 | -1.69912328 |     |
| HOMER3    | -0.22329075 | 0.18091540 | -1.69886158 |     |
| UTY       | 0.22326416  | 0.18097490 | 1.69864868  |     |
| ETFDH     | 0.22325393  | 0.18098709 | 1.69856676  |     |
| CD200     | -0.22322140 | 0.18105196 | -1.69830625 |     |
| TMEM117   | 0.22321948  | 0.18105196 | 1.69829091  |     |
| C14orf19  | 0.22315311  | 0.18122671 | 1.69775945  |     |
| PPP2R5C   | 0.22313407  | 0.18126442 | 1.69760703  |     |

|              |             |            |             |
|--------------|-------------|------------|-------------|
| HCP5         | 0.22310412  | 0.18133376 | 1.69736723  |
| RBM35A       | 0.22309464  | 0.18134378 | 1.69729134  |
| FXYD5        | -0.22308382 | 0.18135771 | -1.69720469 |
| ARHGAP19     | 0.22307134  | 0.18137644 | 1.69710476  |
| LILRP2       | -0.22304933 | 0.18142280 | -1.69692852 |
| PDK1         | 0.22301730  | 0.18149820 | 1.69667211  |
| C20orf103    | -0.22299491 | 0.18154567 | -1.69649286 |
| LYZL6        | -0.22296811 | 0.18160595 | -1.69627831 |
| CCNB1IP1     | 0.22293111  | 0.18169581 | 1.69598214  |
| C1orf135     | -0.22292477 | 0.18169676 | -1.69593135 |
| WNT2B        | -0.22291379 | 0.18169808 | -1.69584342 |
| EIF3F        | 0.22291229  | 0.18169808 | 1.69583141  |
| C13orf23     | 0.22285792  | 0.18183840 | 1.69539619  |
| DLEU2L       | 0.22284171  | 0.18186800 | 1.69526641  |
| HLA-B        | 0.22282432  | 0.18190102 | 1.69512723  |
| ACSL1        | -0.22279381 | 0.18197214 | -1.69488303 |
| DCST2        | -0.22278779 | 0.18197216 | -1.69483483 |
| KEAP1        | 0.22276086  | 0.18203293 | 1.69461923  |
| KIAA0355     | -0.22273685 | 0.18208521 | -1.69442705 |
| STRA13       | -0.22268939 | 0.18219096 | -1.69404719 |
| NOP14        | 0.22268843  | 0.18219096 | 1.69403951  |
| CD180        | 0.22268020  | 0.18219096 | 1.69397363  |
| C8orf15      | 0.22267640  | 0.18219096 | 1.69394322  |
| ANKRD40      | -0.22262576 | 0.18232073 | -1.69353786 |
| DUOX2        | 0.22260224  | 0.18237164 | 1.69334963  |
| C6orf118     | 0.22258343  | 0.18238772 | 1.69319906  |
| KIAA1274     | -0.22257867 | 0.18238772 | -1.69316100 |
| HTN3         | -0.22258138 | 0.18238772 | -1.69318269 |
| LOC283174    | -0.22254064 | 0.18242812 | -1.69285661 |
| KIR2DL1      | -0.22255598 | 0.18242812 | -1.69297943 |
| P2RY11       | -0.22254746 | 0.18242812 | -1.69291120 |
| TET1         | -0.22253472 | 0.18242812 | -1.69280925 |
| ZBED4        | 0.22254644  | 0.18242812 | 1.69290301  |
| FCGR3A       | -0.22248353 | 0.18253106 | -1.69239952 |
| ERAF         | -0.22247721 | 0.18253106 | -1.69234899 |
| SERPINI2     | 0.22247530  | 0.18253106 | 1.69233369  |
| CXCL16       | 0.22248052  | 0.18253106 | 1.69237544  |
| LOC100129395 | -0.22243253 | 0.18258643 | -1.69199140 |
| C3orf67      | 0.22244534  | 0.18258643 | 1.69209397  |
| C1orf157     | -0.22243223 | 0.18258643 | -1.69198905 |
| ARVCF        | -0.22243670 | 0.18258643 | -1.69202478 |
| ZNF266       | 0.22241090  | 0.18263103 | 1.69181835  |
| TAF10        | -0.22239039 | 0.18267328 | -1.69165415 |
| PRPH2        | -0.22237830 | 0.18269096 | -1.69155746 |
| SPAG16       | 0.22233786  | 0.18279125 | 1.69123381  |
| MID1IP1      | 0.22232505  | 0.18281105 | 1.69113132  |
| FMNL2        | -0.22229489 | 0.18283174 | -1.69088994 |
| GIMAP2       | 0.22229392  | 0.18283174 | 1.69088223  |
| CNOT3        | -0.22230970 | 0.18283174 | -1.69100846 |
| UCHL5IP      | -0.22230321 | 0.18283174 | -1.69095658 |

|               |             |            |             |
|---------------|-------------|------------|-------------|
| EXOG          | 0.22228080  | 0.18285246 | 1.69077725  |
| KRTAP7-1      | -0.22220775 | 0.18304786 | -1.69019269 |
| C8orf86       | -0.22217793 | 0.18311730 | -1.68995410 |
| ATP6V1G1      | 0.22216341  | 0.18314212 | 1.68983793  |
| ANXA13        | -0.22214805 | 0.18316940 | -1.68971506 |
| INHBB         | -0.22210883 | 0.18326630 | -1.68940125 |
| CDC42BPA      | 0.22208413  | 0.18332086 | 1.68920361  |
| PDCD10        | 0.22207248  | 0.18332302 | 1.68911037  |
| OR10S1        | -0.22206778 | 0.18332302 | -1.68907282 |
| DGAT2L6       | -0.22206537 | 0.18332302 | -1.68905350 |
| ELAC2         | 0.22203412  | 0.18339670 | 1.68880351  |
| EFNA1         | 0.22202781  | 0.18339760 | 1.68875299  |
| NOX1          | -0.22198712 | 0.18349886 | -1.68842750 |
| HOXA1         | -0.22197092 | 0.18352865 | -1.68829787 |
| SVIL          | -0.22195167 | 0.18356734 | -1.68814387 |
| CADM1         | -0.22194050 | 0.18358243 | -1.68805449 |
| EIF3J         | 0.22187282  | 0.18376266 | 1.68751310  |
| ISCU          | 0.22185435  | 0.18378156 | 1.68736533  |
| NKAIN3        | -0.22186033 | 0.18378156 | -1.68741316 |
| APBA2         | -0.22182116 | 0.18386105 | -1.68709982 |
| CYP4F22       | -0.22178402 | 0.18395212 | -1.68680273 |
| ALS2CR8       | 0.22176497  | 0.18399027 | 1.68665041  |
| PDE4D         | 0.22174577  | 0.18402889 | 1.68649680  |
| NGFRAP1       | -0.22172552 | 0.18407057 | -1.68633486 |
| ICMT          | 0.22170395  | 0.18411613 | 1.68616233  |
| SNORA36A      | -0.22168398 | 0.18415704 | -1.68600253 |
| TSFM          | 0.22167698  | 0.18415995 | 1.68594654  |
| FABP4         | -0.22165754 | 0.18419928 | -1.68579110 |
| UXT           | 0.22162525  | 0.18427626 | 1.68553283  |
| PHGDH         | -0.22160177 | 0.18432745 | -1.68534505 |
| TTC38         | -0.22156806 | 0.18440864 | -1.68507542 |
| OC90          | -0.22153768 | 0.18448010 | -1.68483241 |
| OSGIN1        | -0.22150684 | 0.18453529 | -1.68458581 |
| RPN1          | 0.22151099  | 0.18453529 | 1.68461896  |
| LOC100133399  | -0.22146522 | 0.18463975 | -1.68425295 |
| RP11-165H20.1 | -0.22138840 | 0.18484756 | -1.68363860 |
| MCAM          | -0.22138031 | 0.18485368 | -1.68357390 |
| TLX3          | -0.22137021 | 0.18486570 | -1.68349316 |
| FOXN1         | -0.22131814 | 0.18500098 | -1.68307676 |
| NUDT8         | -0.22130619 | 0.18501843 | -1.68298123 |
| PEPD          | 0.22127754  | 0.18508496 | 1.68275213  |
| CCDC104       | 0.22124960  | 0.18513764 | 1.68252869  |
| KLF3          | 0.22124761  | 0.18513764 | 1.68251278  |
| MRFAP1L1      | 0.22124067  | 0.18514037 | 1.68245733  |
| HSD11B1L      | -0.22122171 | 0.18517847 | -1.68230568 |
| KRTAP22-1     | -0.22121384 | 0.18518394 | -1.68224280 |
| OR52I1        | -0.22116752 | 0.18530250 | -1.68187237 |
| FGGY          | 0.22114071  | 0.18536368 | 1.68165803  |
| RNF19A        | 0.22108294  | 0.18549831 | 1.68119615  |
| EXOSC10       | 0.22108746  | 0.18549831 | 1.68123232  |

|              |             |            |             |
|--------------|-------------|------------|-------------|
| PKM2         | 0.22107135  | 0.18551474 | 1.68110352  |
| GRTP1        | 0.22104654  | 0.18557013 | 1.68090509  |
| RABGEF1      | 0.22101752  | 0.18563786 | 1.68067315  |
| AKAP1        | 0.22100679  | 0.18565179 | 1.68058734  |
| IL4I1        | -0.22098276 | 0.18568907 | -1.68039524 |
| XPO5         | 0.22098212  | 0.18568907 | 1.68039014  |
| FGFBP3       | -0.22094929 | 0.18576809 | -1.68012767 |
| CD96         | 0.22088975  | 0.18592586 | 1.67965166  |
| APBB2        | -0.22087699 | 0.18594578 | -1.67954967 |
| TSEN15       | 0.22084171  | 0.18602970 | 1.67926761  |
| ZNF426       | 0.22083652  | 0.18602970 | 1.67922615  |
| TMEM74       | -0.22080045 | 0.18611836 | -1.67893785 |
| SNORD116-26  | -0.22078456 | 0.18614755 | -1.67881078 |
| TADA1L       | 0.22075176  | 0.18621684 | 1.67854861  |
| OR6C65       | -0.22074333 | 0.18621684 | -1.67848123 |
| NLRP12       | -0.22074307 | 0.18621684 | -1.67847912 |
| METAP2       | 0.22069849  | 0.18633068 | 1.67812285  |
| C20orf181    | -0.22068201 | 0.18636162 | -1.67799109 |
| FDPSL2A      | 0.22060668  | 0.18656639 | 1.67738902  |
| HTR3C        | -0.22059745 | 0.18657592 | -1.67731526 |
| CTTNBP2NL    | 0.22058679  | 0.18658968 | 1.67723005  |
| PDLIM2       | -0.22055889 | 0.18665439 | -1.67700709 |
| C1D          | 0.22049829  | 0.18675840 | 1.67652275  |
| DACT2        | -0.22049477 | 0.18675840 | -1.67649461 |
| C11orf79     | 0.22049370  | 0.18675840 | 1.67648607  |
| BMI1         | 0.22050824  | 0.18675840 | 1.67660225  |
| TECTA        | -0.22049371 | 0.18675840 | -1.67648615 |
| IQCF1        | -0.22047118 | 0.18680727 | -1.67630604 |
| ASAH1        | 0.22046199  | 0.18681670 | 1.67623261  |
| MYBL2        | -0.22043740 | 0.18687168 | -1.67603609 |
| LONRF3       | -0.22042342 | 0.18689527 | -1.67592441 |
| C13orf38     | -0.22040449 | 0.18693352 | -1.67577314 |
| ZBTB2        | 0.22035499  | 0.18706225 | 1.67537756  |
| CXorf64      | -0.22032883 | 0.18712194 | -1.67516849 |
| PQLC3        | 0.22028737  | 0.18722694 | 1.67483721  |
| RBM26        | 0.22027925  | 0.18723323 | 1.67477231  |
| C5orf26      | -0.22027228 | 0.18723610 | -1.67471660 |
| LRRC37B2     | 0.22025634  | 0.18724776 | 1.67458929  |
| HEATR2       | 0.22026095  | 0.18724776 | 1.67462605  |
| TAL2         | -0.22024424 | 0.18726585 | -1.67449254 |
| TINP1        | 0.22017925  | 0.18744063 | 1.67397332  |
| FSHR         | -0.22013307 | 0.18753740 | -1.67360429 |
| IL15RA       | -0.22013669 | 0.18753740 | -1.67363319 |
| PDE7A        | 0.22012861  | 0.18753740 | 1.67356871  |
| LRRK1        | 0.22008733  | 0.18764206 | 1.67323881  |
| MCAT         | 0.22004086  | 0.18773764 | 1.67286762  |
| MYH7B        | -0.22004060 | 0.18773764 | -1.67286552 |
| COL14A1      | -0.22003112 | 0.18773764 | -1.67278973 |
| RNF8         | 0.22003681  | 0.18773764 | 1.67283526  |
| LOC100128372 | -0.22001944 | 0.18775448 | -1.67269648 |



|             |             |            |             |     |
|-------------|-------------|------------|-------------|-----|
| ATG9B       | -0.21999752 | 0.18778395 | -1.67252131 |     |
| IRAK1       | -0.21999812 | 0.18778395 | -1.67252614 |     |
| RUFY3       | 0.21996931  | 0.18784988 | 1.67229594  |     |
| DDX3Y       | 0.21995782  | 0.18786618 | 1.67220416  |     |
| DES         | -0.21992335 | 0.18795071 | -1.67192881 |     |
| ARCN1       | 0.21988951  | 0.18803340 | 1.67165849  |     |
| NKAPL       | -0.21987365 | 0.18806270 | -1.67153178 |     |
| HNRNPD      | 0.21982780  | 0.18818112 | 1.67116552  |     |
| FLJ45974    | -0.21979589 | 0.18825815 | -1.67091062 |     |
| PNPLA7      | -0.21977855 | 0.18829190 | -1.67077206 |     |
| hCG_1983332 | -0.21974836 | 0.18836383 | -1.67053093 |     |
| PSMC3IP     | 0.21969596  | 0.18850188 | 1.67011239  |     |
| TAS2R38     | -0.21967334 | 0.18855134 | -1.66993174 |     |
| C19orf18    | 0.21961996  | 0.18868250 | 1.66950533  |     |
| HUS1        | 0.21959739  | 0.18868250 | 1.66932508  |     |
| BCAS3       | 0.21960564  | 0.18868250 | 1.66939099  |     |
| H2AFJ       | -0.21960389 | 0.18868250 | -1.66937697 |     |
| PTBP1       | 0.21959331  | 0.18868250 | 1.66929247  |     |
| CCL24       | -0.21959399 | 0.18868250 | -1.66929790 |     |
| MSRB3       | -0.21957108 | 0.18873084 | -1.66911491 |     |
| OR7D2       | -0.21953487 | 0.18882083 | -1.66882574 |     |
| MUM1L1      | -0.21945373 | 0.18900908 | -1.66817770 |     |
| ZNHIT2      | -0.21946079 | 0.18900908 | -1.66823410 |     |
| GKAP1       | 0.21945371  | 0.18900908 | 1.66817761  |     |
| SH3BP2      | -0.21942002 | 0.18909166 | -1.66790855 | yes |
| NPM2        | -0.21937211 | 0.18919880 | -1.66752593 |     |
| LOC643330   | -0.21937529 | 0.18919880 | -1.66755134 |     |
| TMEM26      | -0.21931565 | 0.18931360 | -1.66707508 |     |
| C1orf174    | 0.21932050  | 0.18931360 | 1.66711377  |     |
| GKN1        | -0.21932009 | 0.18931360 | -1.66711049 |     |
| ISOC1       | 0.21930758  | 0.18931980 | 1.66701061  |     |
| PSKH1       | -0.21927377 | 0.18940284 | -1.66674062 |     |
| SVOP        | -0.21924788 | 0.18946223 | -1.66653392 |     |
| SNORD101    | 0.21921821  | 0.18953293 | 1.66629701  |     |
| CIRBP       | 0.21918395  | 0.18961486 | 1.66602344  |     |
| C20orf39    | -0.21917880 | 0.18961486 | -1.66598231 |     |
| OVCH2       | -0.21916327 | 0.18964334 | -1.66585833 |     |
| NAT10       | 0.21913982  | 0.18969378 | 1.66567111  |     |
| TM4SF20     | -0.21913440 | 0.18969378 | -1.66562784 |     |
| YIPF2       | -0.21905606 | 0.18991009 | -1.66500236 |     |
| RAB3C       | -0.21903017 | 0.18991620 | -1.66479561 |     |
| C3orf64     | 0.21903534  | 0.18991620 | 1.66483694  |     |
| C12orf75    | 0.21903401  | 0.18991620 | 1.66482626  |     |
| NFATC3      | 0.21903004  | 0.18991620 | 1.66479462  |     |
| MRPL20      | 0.21901369  | 0.18994719 | 1.66466406  |     |
| FLJ43080    | 0.21899606  | 0.18998201 | 1.66452328  |     |
| C4orf30     | 0.21898809  | 0.18998582 | 1.66445970  |     |
| APPL2       | 0.21896482  | 0.18998582 | 1.66427391  |     |
| ZCCHC18     | -0.21897070 | 0.18998582 | -1.66432088 |     |
| SHH         | -0.21896699 | 0.18998582 | -1.66429122 |     |

|              |             |            |             |
|--------------|-------------|------------|-------------|
| NEK9         | 0.21896629  | 0.18998582 | 1.66428563  |
| ADORA2A      | -0.21894757 | 0.19001099 | -1.66413622 |
| CD97         | 0.21894442  | 0.19001099 | 1.66411107  |
| TUBA3E       | -0.21893466 | 0.19001705 | -1.66403316 |
| FEZ2         | 0.21893042  | 0.19001705 | 1.66399926  |
| C5orf27      | -0.21890838 | 0.19006506 | -1.66382333 |
| BACE1        | -0.21887247 | 0.19015461 | -1.66353666 |
| PGLYRP4      | -0.21886602 | 0.19015597 | -1.66348520 |
| HSF2         | 0.21883641  | 0.19022669 | 1.66324880  |
| PDCD11       | 0.21882423  | 0.19024521 | 1.66315161  |
| STOX1        | 0.21879877  | 0.19025351 | 1.66294834  |
| DUSP5P       | -0.21881256 | 0.19025351 | -1.66305841 |
| PPP1R3B      | -0.21879980 | 0.19025351 | -1.66295658 |
| SOCS2        | -0.21879751 | 0.19025351 | -1.66293827 |
| DGCR6L       | -0.21876469 | 0.19033386 | -1.66267628 |
| PRKACA       | -0.21871470 | 0.19046567 | -1.66227727 |
| LOC100130494 | -0.21869671 | 0.19050162 | -1.66213371 |
| C12orf29     | 0.21868853  | 0.19050820 | 1.66206838  |
| ULK4         | 0.21867523  | 0.19053012 | 1.66196222  |
| VPS72        | 0.21865793  | 0.19056402 | 1.66182414  |
| KIAA1958     | -0.21864667 | 0.19057190 | -1.66173426 |
| KLHL6        | 0.21864333  | 0.19057190 | 1.66170760  |
| AQP3         | 0.21863521  | 0.19057829 | 1.66164281  |
| CASP8AP2     | 0.21862414  | 0.19059352 | 1.66155446  |
| SAT2         | -0.21855917 | 0.19077038 | -1.66103592 |
| SNORD49A     | 0.21852320  | 0.19085544 | 1.66074879  |
| RPL29        | -0.21851885 | 0.19085544 | -1.66071407 |
| SGSM1        | -0.21849568 | 0.19087106 | -1.66052921 |
| C11orf48     | 0.21850755  | 0.19087106 | 1.66062392  |
| B3GNT4       | -0.21849755 | 0.19087106 | -1.66054408 |
| CCDC75       | 0.21848756  | 0.19087749 | 1.66046436  |
| HNRNPA3      | 0.21846999  | 0.19091225 | 1.66032414  |
| ZNF446       | -0.21842154 | 0.19103972 | -1.65993746 |
| ATF2         | 0.21838313  | 0.19113709 | 1.65963093  |
| SLFN13       | 0.21834929  | 0.19122074 | 1.65936095  |
| ZNF440       | 0.21829199  | 0.19135239 | 1.65890367  |
| RRP7A        | -0.21828753 | 0.19135239 | -1.65886808 |
| NMT1         | 0.21828853  | 0.19135239 | 1.65887609  |
| C22orf33     | -0.21827125 | 0.19136534 | -1.65873819 |
| CCDC8        | -0.21827588 | 0.19136534 | -1.65877512 |
| FUT2         | 0.21822851  | 0.19147584 | 1.65839714  |
| FUT1         | -0.21817644 | 0.19161446 | -1.65798167 |
| IL1A         | -0.21815741 | 0.19165372 | -1.65782981 |
| CAPN13       | 0.21814291  | 0.19167933 | 1.65771414  |
| FLJ41649     | -0.21813662 | 0.19168027 | -1.65766391 |
| HMG20B       | -0.21811324 | 0.19173262 | -1.65747738 |
| AGPAT1       | -0.21808974 | 0.19178534 | -1.65728989 |
| PATL1        | 0.21805149  | 0.19188251 | 1.65698468  |
| MFSD4        | 0.21803161  | 0.19192434 | 1.65682611  |
| HOXA2        | -0.21799846 | 0.19200618 | -1.65656162 |

|              |             |            |             |
|--------------|-------------|------------|-------------|
| PTPDC1       | -0.21798985 | 0.19201409 | -1.65649294 |
| LOC100129608 | -0.21796559 | 0.19205113 | -1.65629940 |
| FOXJ2        | -0.21796608 | 0.19205113 | -1.65630329 |
| BRD7         | 0.21795371  | 0.19206890 | 1.65620461  |
| NFXL1        | 0.21787851  | 0.19227755 | 1.65560472  |
| FAM122B      | 0.21787103  | 0.19228209 | 1.65554499  |
| KLHL24       | 0.21784386  | 0.19234598 | 1.65532828  |
| ADNP         | 0.21783301  | 0.19236068 | 1.65524169  |
| TMEM30B      | 0.21780920  | 0.19239639 | 1.65505180  |
| RETSAT       | 0.21781382  | 0.19239639 | 1.65508861  |
| LOC100049716 | 0.21775053  | 0.19252905 | 1.65458376  |
| MNS1         | 0.21774729  | 0.19252905 | 1.65455797  |
| KLHL13       | 0.21774839  | 0.19252905 | 1.65456670  |
| LOC100131017 | -0.21772865 | 0.19253115 | -1.65440928 |
| CCT8L2       | -0.21773241 | 0.19253115 | -1.65443926 |
| TRAV9-2      | -0.21773511 | 0.19253115 | -1.65446082 |
| KRTAP20-1    | -0.21771606 | 0.19253304 | -1.65430886 |
| GPR55        | -0.21771948 | 0.19253304 | -1.65433614 |
| DKK2         | -0.21770554 | 0.19253831 | -1.65422489 |
| OSGIN2       | 0.21769638  | 0.19253831 | 1.65415185  |
| GPRC5A       | 0.21769733  | 0.19253831 | 1.65415946  |
| ABCC5        | 0.21766380  | 0.19261859 | 1.65389201  |
| MMP9         | -0.21763022 | 0.19268388 | -1.65362415 |
| STAG3L4      | 0.21763108  | 0.19268388 | 1.65363097  |
| KRTAP19-4    | -0.21762327 | 0.19268681 | -1.65356873 |
| ATP6V1B2     | 0.21760865  | 0.19269488 | 1.65345206  |
| LOC100133429 | -0.21761119 | 0.19269488 | -1.65347239 |
| ZNF235       | 0.21758764  | 0.19274027 | 1.65328450  |
| LRRC68       | -0.21757643 | 0.19275607 | -1.65319509 |
| TRMT2A       | -0.21756716 | 0.19276601 | -1.65312119 |
| WDFY3        | 0.21755330  | 0.19278981 | 1.65301067  |
| P2RY10       | 0.21753946  | 0.19281358 | 1.65290023  |
| HDAC3        | 0.21753297  | 0.19281511 | 1.65284853  |
| PYCR1        | -0.21749661 | 0.19288887 | -1.65255850 |
| SIPA1        | -0.21749940 | 0.19288887 | -1.65258072 |
| TNNI2        | -0.21740482 | 0.19314148 | -1.65182650 |
| PTDSS1       | 0.21740109  | 0.19314148 | 1.65179673  |
| DAK          | 0.21737795  | 0.19319340 | 1.65161217  |
| TNK1         | -0.21736369 | 0.19321846 | -1.65149844 |
| HOXA6        | -0.21733064 | 0.19330037 | -1.65123490 |
| LNX2         | 0.21730593  | 0.19335707 | 1.65103785  |
| ZNF597       | 0.21728927  | 0.19337130 | 1.65090503  |
| SFRS15       | 0.21728959  | 0.19337130 | 1.65090755  |
| UBE2NL       | -0.21724493 | 0.19348746 | -1.65055143 |
| ARSI         | -0.21720795 | 0.19356325 | -1.65025656 |
| CCKAR        | -0.21721289 | 0.19356325 | -1.65029596 |
| ADI1         | 0.21719182  | 0.19359401 | 1.65012794  |
| MFSD5        | 0.21716807  | 0.19364786 | 1.64993859  |
| CCNT1        | 0.21716082  | 0.19365173 | 1.64988075  |
| HSPB7        | -0.21709001 | 0.19384822 | -1.64931619 |

|              |             |            |             |
|--------------|-------------|------------|-------------|
| PTP4A1       | 0.21705639  | 0.19393207 | 1.64904809  |
| KRTAP4-3     | -0.21704963 | 0.19393443 | -1.64899426 |
| PHB2         | 0.21702151  | 0.19396373 | 1.64877006  |
| ZNF57        | 0.21701607  | 0.19396373 | 1.64872668  |
| TSPAN12      | 0.21702405  | 0.19396373 | 1.64879031  |
| ARMCX2       | -0.21702653 | 0.19396373 | -1.64881005 |
| UGT1A10      | 0.21699730  | 0.19400254 | 1.64857704  |
| TPST2        | -0.21698700 | 0.19401567 | -1.64849491 |
| FAM92A1      | -0.21697083 | 0.19404662 | -1.64836596 |
| SLC19A2      | 0.21694981  | 0.19409227 | 1.64819838  |
| HNRNPC       | 0.21693785  | 0.19410331 | 1.64810303  |
| FAM104A      | 0.21693422  | 0.19410331 | 1.64807414  |
| HMBOX1       | 0.21691825  | 0.19413366 | 1.64794679  |
| LOC100133400 | 0.21690421  | 0.19415814 | 1.64783488  |
| CHD9         | 0.21687836  | 0.19420035 | 1.64762879  |
| CYP4F2       | -0.21688065 | 0.19420035 | -1.64764703 |
| OR7A10       | -0.21681229 | 0.19436520 | -1.64710205 |
| MUC7         | -0.21680018 | 0.19436520 | -1.64700555 |
| PAFAH1B3     | -0.21680309 | 0.19436520 | -1.64702871 |
| GALNAC4S-6ST | 0.21680460  | 0.19436520 | 1.64704080  |
| PSMC3        | 0.21678713  | 0.19436857 | 1.64690151  |
| RELT         | -0.21678825 | 0.19436857 | -1.64691044 |
| ZNF783       | -0.21674306 | 0.19448112 | -1.64655024 |
| AGBL2        | 0.21673814  | 0.19448112 | 1.64651098  |
| CES2         | 0.21667545  | 0.19465349 | 1.64601129  |
| GOSR2        | 0.21664756  | 0.19472014 | 1.64578897  |
| LRRC49       | 0.21661363  | 0.19478699 | 1.64551858  |
| ACTR5        | 0.21661620  | 0.19478699 | 1.64553900  |
| OR5AN1       | -0.21660597 | 0.19479186 | -1.64545747 |
| TSPAN8       | 0.21660009  | 0.19479186 | 1.64541066  |
| IL5          | -0.21657998 | 0.19483488 | -1.64525035 |
| TTC23L       | 0.21657030  | 0.19484616 | 1.64517322  |
| KIF3A        | 0.21650475  | 0.19502749 | 1.64465073  |
| MAP4         | -0.21648120 | 0.19505669 | -1.64446301 |
| NME1         | 0.21648078  | 0.19505669 | 1.64445974  |
| S100P        | 0.21647725  | 0.19505669 | 1.64443155  |
| CES3         | -0.21645075 | 0.19511920 | -1.64422034 |
| EZH2         | 0.21643290  | 0.19514890 | 1.64407811  |
| SLC16A2      | -0.21642906 | 0.19514890 | -1.64404750 |
| KLK12        | -0.21640636 | 0.19519985 | -1.64386660 |
| OIP5         | -0.21637359 | 0.19528150 | -1.64360543 |
| NODAL        | -0.21627941 | 0.19555036 | -1.64285496 |
| ZNF667       | -0.21622123 | 0.19570966 | -1.64239130 |
| VKORC1       | -0.21620736 | 0.19573376 | -1.64228082 |
| C6orf218     | -0.21618259 | 0.19579115 | -1.64208342 |
| C8orf45      | 0.21614775  | 0.19583996 | 1.64180580  |
| FAM63B       | 0.21614297  | 0.19583996 | 1.64176772  |
| TG           | -0.21614272 | 0.19583996 | -1.64176576 |
| KIAA0408     | -0.21614431 | 0.19583996 | -1.64177840 |
| C12orf49     | 0.21610016  | 0.19595171 | 1.64142659  |

|              |             |            |             |
|--------------|-------------|------------|-------------|
| DOCK9        | 0.21608125  | 0.19599122 | 1.64127597  |
| STAMBP       | 0.21606731  | 0.19601557 | 1.64116488  |
| SYAP1        | 0.21604075  | 0.19607847 | 1.64095330  |
| NUDT16P      | -0.21600249 | 0.19615891 | -1.64064846 |
| UPP1         | -0.21600527 | 0.19615891 | -1.64067057 |
| OSTalpha     | 0.21599640  | 0.19615930 | 1.64059989  |
| PCP4         | -0.21593384 | 0.19633229 | -1.64010153 |
| RBM19        | -0.21584169 | 0.19659601 | -1.63936735 |
| NHEDC1       | -0.21578969 | 0.19673695 | -1.63895314 |
| ELA1         | -0.21577867 | 0.19675242 | -1.63886532 |
| WASF1        | -0.21576908 | 0.19676351 | -1.63878892 |
| GPR148       | -0.21575586 | 0.19678571 | -1.63868365 |
| CTNNBIP1     | -0.21571934 | 0.19687930 | -1.63839276 |
| KIAA1609     | 0.21570428  | 0.19689784 | 1.63827277  |
| C19orf15     | -0.21570136 | 0.19689784 | -1.63824948 |
| FAM123C      | -0.21565228 | 0.19701168 | -1.63785854 |
| C6orf199     | 0.21565345  | 0.19701168 | 1.63786788  |
| OR7D4        | -0.21562298 | 0.19706491 | -1.63762515 |
| EPHA6        | -0.21562611 | 0.19706491 | -1.63765008 |
| FAM108A5     | -0.21561652 | 0.19706642 | -1.63757369 |
| PANX1        | 0.21560130  | 0.19709478 | 1.63745248  |
| ODZ1         | -0.21557072 | 0.19717026 | -1.63720894 |
| RPUSD3       | 0.21554111  | 0.19724279 | 1.63697308  |
| ZNF828       | 0.21552846  | 0.19726329 | 1.63687233  |
| UGCGL2       | 0.21549676  | 0.19734225 | 1.63661985  |
| WNT11        | -0.21548935 | 0.19734669 | -1.63656081 |
| TLK2         | 0.21547973  | 0.19735789 | 1.63648423  |
| ZNF557       | 0.21545297  | 0.19741453 | 1.63627111  |
| PRSS12       | 0.21544934  | 0.19741453 | 1.63624222  |
| CXCL1        | 0.21541731  | 0.19747623 | 1.63598712  |
| KIAA0528     | 0.21541789  | 0.19747623 | 1.63599168  |
| CAPN5        | 0.21541024  | 0.19747964 | 1.63593076  |
| GBP4         | 0.21537435  | 0.19749824 | 1.63564500  |
| SIRT3        | -0.21538282 | 0.19749824 | -1.63571241 |
| NUPR1        | -0.21538278 | 0.19749824 | -1.63571207 |
| FGD6         | 0.21537874  | 0.19749824 | 1.63567991  |
| ZNF486       | 0.21539744  | 0.19749824 | 1.63582885  |
| OR51T1       | -0.21534993 | 0.19755492 | -1.63545050 |
| IGLL1        | -0.21534368 | 0.19755581 | -1.63540069 |
| MORF4        | -0.21532857 | 0.19758390 | -1.63528036 |
| USP11        | 0.21530933  | 0.19762467 | 1.63512716  |
| ZNF587       | 0.21529743  | 0.19764292 | 1.63503237  |
| ST6GALNAC2   | 0.21527628  | 0.19768954 | 1.63486401  |
| LOC100133355 | -0.21525795 | 0.19769094 | -1.63471797 |
| OCA2         | -0.21525930 | 0.19769094 | -1.63472875 |
| FAM38A       | -0.21526420 | 0.19769094 | -1.63476778 |
| TFAP4        | -0.21523739 | 0.19773578 | -1.63455425 |
| DDX51        | -0.21521756 | 0.19775803 | -1.63439642 |
| LOC440093    | 0.21522057  | 0.19775803 | 1.63442035  |
| LYRM7        | 0.21521226  | 0.19775803 | 1.63435419  |

|              |             |            |             |     |
|--------------|-------------|------------|-------------|-----|
| THOC1        | 0.21519572  | 0.19779055 | 1.63422245  |     |
| LCE2D        | -0.21517734 | 0.19782871 | -1.63407613 |     |
| FAM83G       | -0.21515986 | 0.19786411 | -1.63393695 |     |
| CCDC3        | -0.21514483 | 0.19789200 | -1.63381726 |     |
| MRAP         | -0.21511492 | 0.19796564 | -1.63357906 |     |
| PID1         | 0.21510881  | 0.19796610 | 1.63353041  |     |
| FUS          | 0.21509314  | 0.19798231 | 1.63340566  |     |
| CSN1S2A      | -0.21508886 | 0.19798231 | -1.63337156 |     |
| UNQ1945      | -0.21508566 | 0.19798231 | -1.63334610 |     |
| LOC284912    | -0.21507100 | 0.19800907 | -1.63322936 |     |
| SLC9A11      | 0.21504316  | 0.19807636 | 1.63300772  |     |
| SLC13A2      | -0.21502935 | 0.19810051 | -1.63289777 |     |
| IQUB         | 0.21500206  | 0.19816612 | 1.63268051  |     |
| RORB         | -0.21498377 | 0.19820407 | -1.63253489 |     |
| OR9Q1        | -0.21496225 | 0.19825196 | -1.63236354 |     |
| PLXND1       | -0.21492533 | 0.19834728 | -1.63206956 | yes |
| USP27X       | -0.21491156 | 0.19837133 | -1.63195994 |     |
| N4BP2L2      | 0.21489459  | 0.19838689 | 1.63182485  |     |
| LRFN3        | -0.21489847 | 0.19838689 | -1.63185576 |     |
| PRSS35       | -0.21485098 | 0.19850283 | -1.63147770 |     |
| MARCO        | -0.21480649 | 0.19862154 | -1.63112350 |     |
| LOC100128751 | -0.21475054 | 0.19877564 | -1.63067809 |     |
| LOC93622     | 0.21474327  | 0.19877970 | 1.63062019  |     |
| TNFSF14      | -0.21472834 | 0.19880734 | -1.63050140 |     |
| LILRB2       | -0.21471310 | 0.19883598 | -1.63038005 |     |
| ITGA4        | 0.21470527  | 0.19884175 | 1.63031773  |     |
| SMC6         | 0.21467333  | 0.19892190 | 1.63006346  |     |
| TMEM200A     | 0.21464040  | 0.19898671 | 1.62980139  |     |
| POMGNT1      | -0.21464433 | 0.19898671 | -1.62983262 |     |
| DEFB115      | -0.21461555 | 0.19904503 | -1.62960353 |     |
| BPIL2        | -0.21449375 | 0.19940274 | -1.62863411 |     |
| STK36        | 0.21447607  | 0.19941557 | 1.62849339  |     |
| EPN3         | -0.21447690 | 0.19941557 | -1.62850002 |     |
| CLEC6A       | -0.21447173 | 0.19941557 | -1.62845880 |     |
| MGP          | -0.21444985 | 0.19946475 | -1.62828472 |     |
| OR6C70       | -0.21443672 | 0.19947958 | -1.62818017 |     |
| TSSK1B       | -0.21443314 | 0.19947958 | -1.62815173 |     |
| ADFP         | -0.21441108 | 0.19951210 | -1.62797613 |     |
| DPP6         | -0.21440475 | 0.19951210 | -1.62792578 |     |
| UQCRC1       | 0.21440536  | 0.19951210 | 1.62793058  |     |
| UFD1L        | 0.21439058  | 0.19953749 | 1.62781301  |     |
| INGX         | -0.21435178 | 0.19963903 | -1.62750422 |     |
| PTPRE        | -0.21431904 | 0.19966663 | -1.62724365 |     |
| C2orf3       | 0.21432075  | 0.19966663 | 1.62725722  |     |
| CCDC65       | 0.21432992  | 0.19966663 | 1.62733021  |     |
| MBD4         | 0.21432980  | 0.19966663 | 1.62732923  |     |
| SETD7        | 0.21428614  | 0.19973388 | 1.62698185  |     |
| BCL10        | 0.21428539  | 0.19973388 | 1.62697582  |     |
| GANAB        | 0.21425017  | 0.19982440 | 1.62669560  |     |
| ZNF528       | 0.21423273  | 0.19985995 | 1.62655677  |     |

|           |             |            |             |
|-----------|-------------|------------|-------------|
| EAPP      | 0.21422526  | 0.19986464 | 1.62649733  |
| ALDOC     | -0.21416276 | 0.20003966 | -1.62600002 |
| LONRF2    | -0.21413334 | 0.20011233 | -1.62576591 |
| TOR1B     | 0.21411814  | 0.20014096 | 1.62564498  |
| IGSF1     | -0.21408623 | 0.20022137 | -1.62539106 |
| hCG_24312 | -0.21403739 | 0.20033582 | -1.62500244 |
| FAM113B   | -0.21404175 | 0.20033582 | -1.62503713 |
| RBM43     | 0.21400277  | 0.20039991 | 1.62472696  |
| FAM83E    | -0.21399885 | 0.20039991 | -1.62469582 |
| ELA2A     | -0.21401051 | 0.20039991 | -1.62478854 |
| DENND2D   | 0.21399076  | 0.20040654 | 1.62463146  |
| RNASEK    | 0.21393269  | 0.20055632 | 1.62416942  |
| VILL      | 0.21393056  | 0.20055632 | 1.62415243  |
| ZHX3      | -0.21391483 | 0.20056816 | -1.62402733 |
| HHEX      | -0.21391502 | 0.20056816 | -1.62402884 |
| CYB561D1  | -0.21390467 | 0.20058124 | -1.62394644 |
| DNAJC17   | -0.21389628 | 0.20058880 | -1.62387969 |
| CD5       | -0.21387121 | 0.20064809 | -1.62368029 |
| LOC220077 | -0.21385085 | 0.20069281 | -1.62351828 |
| DNAJC27   | 0.21380107  | 0.20082883 | 1.62312228  |
| NDOR1     | -0.21368161 | 0.20117793 | -1.62217200 |
| CYCS      | 0.21367679  | 0.20117793 | 1.62213360  |
| NLRP13    | -0.21366972 | 0.20118139 | -1.62207739 |
| SPC24     | -0.21364685 | 0.20123398 | -1.62189546 |
| ALAS1     | 0.21362632  | 0.20127930 | 1.62173216  |
| SERPING1  | -0.21358647 | 0.20138473 | -1.62141516 |
| LOC650157 | -0.21356999 | 0.20141748 | -1.62128409 |
| CCDC111   | 0.21351470  | 0.20155997 | 1.62084434  |
| SRP72     | 0.21351064  | 0.20155997 | 1.62081202  |
| ZYX       | -0.21350634 | 0.20155997 | -1.62077781 |
| RUVBL2    | 0.21348473  | 0.20160704 | 1.62060596  |
| PCDH11X   | -0.21347931 | 0.20160704 | -1.62056285 |
| NFKBIZ    | 0.21344423  | 0.20169774 | 1.62028381  |
| RNF39     | -0.21342671 | 0.20173377 | -1.62014444 |
| AHCTF1    | 0.21341598  | 0.20174865 | 1.62005911  |
| TTC30B    | 0.21340733  | 0.20175705 | 1.61999031  |
| C17orf79  | -0.21336207 | 0.20187949 | -1.61963039 |
| CEBPZ     | 0.21330828  | 0.20196324 | 1.61920260  |
| BRD4      | -0.21331528 | 0.20196324 | -1.61925829 |
| BACE2     | -0.21331799 | 0.20196324 | -1.61927982 |
| GLT8D3    | 0.21331914  | 0.20196324 | 1.61928891  |
| CCDC6     | 0.21330544  | 0.20196324 | 1.61918000  |
| KCNJ6     | -0.21329121 | 0.20198904 | -1.61906686 |
| POLR3G    | -0.21327457 | 0.20202236 | -1.61893451 |
| TUBGCP5   | 0.21325647  | 0.20206024 | 1.61879054  |
| CD83      | -0.21324007 | 0.20209281 | -1.61866015 |
| ATRX      | 0.21321450  | 0.20215400 | 1.61845679  |
| NPM3      | -0.21317717 | 0.20225187 | -1.61815995 |
| OTUD6A    | -0.21314824 | 0.20229090 | -1.61792992 |
| TSSK2     | -0.21314681 | 0.20229090 | -1.61791854 |

|              |             |            |             |     |
|--------------|-------------|------------|-------------|-----|
| PAK3         | -0.21315564 | 0.20229090 | -1.61798872 |     |
| TMEM156      | 0.21313866  | 0.20229776 | 1.61785373  |     |
| DOCK7        | 0.21304954  | 0.20255736 | 1.61714509  |     |
| HSPA1A       | 0.21302044  | 0.20262968 | 1.61691365  |     |
| TTLL5        | 0.21298810  | 0.20267522 | 1.61665653  | yes |
| SGEF         | 0.21298801  | 0.20267522 | 1.61665584  |     |
| DENND1C      | -0.21299036 | 0.20267522 | -1.61667448 |     |
| GSTCD        | 0.21297624  | 0.20269342 | 1.61656221  |     |
| PRPF40B      | -0.21294322 | 0.20277798 | -1.61629974 |     |
| LNPEP        | 0.21293148  | 0.20279608 | 1.61620640  |     |
| GLE1         | 0.21289048  | 0.20288928 | 1.61588040  |     |
| FIS1         | -0.21288119 | 0.20288928 | -1.61580649 |     |
| RNF20        | 0.21287213  | 0.20288928 | 1.61573447  |     |
| LOC643233    | -0.21288134 | 0.20288928 | -1.61580770 |     |
| IGSF8        | -0.21287193 | 0.20288928 | -1.61573288 |     |
| RPS2P9       | -0.21285712 | 0.20291697 | -1.61561516 |     |
| UBE2CBP      | 0.21284439  | 0.20293817 | 1.61551398  |     |
| FAM120B      | 0.21282396  | 0.20298346 | 1.61535154  |     |
| UGT2B28      | -0.21276021 | 0.20316427 | -1.61484469 |     |
| ZNF256       | 0.21272826  | 0.20322702 | 1.61459071  |     |
| FRMD7        | -0.21273274 | 0.20322702 | -1.61462637 |     |
| KIN          | 0.21271229  | 0.20325837 | 1.61446380  |     |
| USP50        | -0.21270447 | 0.20326426 | -1.61440159 |     |
| DIDO1        | 0.21269378  | 0.20327910 | 1.61431663  |     |
| KLRG1        | 0.21267678  | 0.20330196 | 1.61418147  |     |
| LIPK         | -0.21267458 | 0.20330196 | -1.61416403 |     |
| WFDC10A      | -0.21263679 | 0.20338307 | -1.61386355 |     |
| GPX2         | 0.21263996  | 0.20338307 | 1.61388881  |     |
| CDK5RAP2     | 0.21262857  | 0.20339017 | 1.61379827  |     |
| ITGB3        | -0.21259832 | 0.20346630 | -1.61355776 |     |
| CYTH3        | -0.21258889 | 0.20347719 | -1.61348284 |     |
| C2orf24      | 0.21257173  | 0.20351232 | 1.61334643  |     |
| FBXO43       | -0.21254915 | 0.20356445 | -1.61316691 | yes |
| SNORD32A     | -0.21253858 | 0.20357892 | -1.61308293 |     |
| GPR174       | 0.21250212  | 0.20367455 | 1.61279311  |     |
| PBX3         | -0.21246082 | 0.20378537 | -1.61246484 |     |
| CMTM4        | 0.21244888  | 0.20380204 | 1.61236999  |     |
| OPA3         | -0.21244361 | 0.20380204 | -1.61232809 |     |
| ATP8B4       | 0.21243630  | 0.20380632 | 1.61227000  |     |
| LOC100128840 | -0.21242872 | 0.20381147 | -1.61220970 |     |
| ELP4         | 0.21236431  | 0.20399483 | 1.61169779  |     |
| CLDN6        | -0.21233530 | 0.20406719 | -1.61146726 |     |
| XCL2         | -0.21228759 | 0.20419829 | -1.61108806 |     |
| C2orf84      | -0.21227514 | 0.20421873 | -1.61098908 |     |
| PXMP2        | -0.21225163 | 0.20427386 | -1.61080229 |     |
| FAM47B       | -0.21223188 | 0.20429855 | -1.61064535 |     |
| FLJ25770     | -0.21223320 | 0.20429855 | -1.61065581 |     |
| UHRF1BP1L    | 0.21220961  | 0.20434984 | 1.61046834  |     |
| SPANXN5      | -0.21220134 | 0.20435714 | -1.61040264 |     |
| ADAM9        | 0.21219268  | 0.20436569 | 1.61033378  |     |



|              |             |            |             |     |
|--------------|-------------|------------|-------------|-----|
| TNFRSF13B    | -0.21215085 | 0.20447844 | -1.61000136 |     |
| CHST6        | 0.21211861  | 0.20455192 | 1.60974516  |     |
| RBBP7        | 0.21211558  | 0.20455192 | 1.60972109  |     |
| MAP3K11      | -0.21209480 | 0.20457134 | -1.60955601 | yes |
| RPS4Y1       | 0.21208633  | 0.20457134 | 1.60948866  |     |
| SRR          | 0.21208563  | 0.20457134 | 1.60948313  |     |
| WASL         | 0.21209858  | 0.20457134 | 1.60958602  |     |
| HIST1H3E     | 0.21203077  | 0.20472513 | 1.60904723  |     |
| C18orf51     | -0.21199837 | 0.20480834 | -1.60878979 |     |
| MDFIC        | -0.21199044 | 0.20481461 | -1.60872673 |     |
| CC2D1A       | -0.21195605 | 0.20490411 | -1.60845349 |     |
| VAC14        | 0.21194435  | 0.20492222 | 1.60836056  |     |
| LOC100132622 | -0.21193731 | 0.20492568 | -1.60830462 |     |
| ACAD8        | 0.21192993  | 0.20493022 | 1.60824594  |     |
| OR2G2        | -0.21189736 | 0.20501402 | -1.60798717 |     |
| LIPH         | 0.21187451  | 0.20505252 | 1.60780562  |     |
| GML          | -0.21187165 | 0.20505252 | -1.60778286 |     |
| CHCHD7       | 0.21186137  | 0.20505252 | 1.60770122  |     |
| CRYZL1       | 0.21186699  | 0.20505252 | 1.60774585  |     |
| INF2         | -0.21181194 | 0.20518944 | -1.60730854 |     |
| ATP8B2       | -0.21177466 | 0.20528818 | -1.60701229 |     |
| RAB43        | -0.21174714 | 0.20533832 | -1.60679367 |     |
| NDUFV2       | 0.21174188  | 0.20533832 | 1.60675190  |     |
| ZNF552       | 0.21174092  | 0.20533832 | 1.60674430  |     |
| FBXO2        | -0.21166536 | 0.20555778 | -1.60614400 |     |
| CENPA        | -0.21165284 | 0.20557852 | -1.60604456 |     |
| C19orf10     | -0.21162103 | 0.20566013 | -1.60579183 |     |
| LOC100128775 | -0.21161072 | 0.20567391 | -1.60570994 |     |
| LOC648987    | 0.21159215  | 0.20571374 | 1.60556247  |     |
| FLJ44477     | -0.21155920 | 0.20579899 | -1.60530068 |     |
| CDS1         | 0.21149613  | 0.20597932 | 1.60479973  | yes |
| CDK3         | -0.21147958 | 0.20601281 | -1.60466830 |     |
| GDF3         | -0.21143681 | 0.20612917 | -1.60432853 |     |
| CXXC5        | -0.21140253 | 0.20621872 | -1.60405626 |     |
| IL18BP       | -0.21134077 | 0.20637640 | -1.60356573 |     |
| VPS33B       | 0.21134569  | 0.20637640 | 1.60360483  |     |
| OSBP         | 0.21132391  | 0.20641094 | 1.60343180  |     |
| SORBS1       | -0.21131087 | 0.20643337 | -1.60332827 |     |
| LOC100131792 | -0.21128620 | 0.20647934 | -1.60313235 |     |
| HP           | -0.21127258 | 0.20647934 | -1.60302414 |     |
| ZNF250       | 0.21128358  | 0.20647934 | 1.60311150  |     |
| DCLK3        | -0.21127802 | 0.20647934 | -1.60306738 |     |
| PABPC1L      | -0.21124555 | 0.20654606 | -1.60280947 |     |
| KCTD20       | 0.21120264  | 0.20666304 | 1.60246869  |     |
| CD247        | -0.21119603 | 0.20666516 | -1.60241622 |     |
| AKR1CL1      | -0.21118320 | 0.20668698 | -1.60231431 |     |
| CDC73        | 0.21117538  | 0.20669290 | 1.60225227  |     |
| PRDM15       | -0.21116756 | 0.20669889 | -1.60219009 |     |
| MPHOSPH8     | 0.21114173  | 0.20676184 | 1.60198499  |     |
| ISG15        | -0.21109415 | 0.20689371 | -1.60160714 |     |

|               |             |            |             |
|---------------|-------------|------------|-------------|
| ANKDD1B       | 0.21104640  | 0.20702615 | 1.60122801  |
| ZNF252        | 0.21101135  | 0.20711843 | 1.60094963  |
| OR2AK2        | -0.21099291 | 0.20715805 | -1.60080322 |
| HTR3A         | -0.21092784 | 0.20733131 | -1.60028655 |
| MMP28         | -0.21092639 | 0.20733131 | -1.60027505 |
| FUT10         | 0.21091182  | 0.20735869 | 1.60015936  |
| FETUB         | -0.21089067 | 0.20739016 | -1.59999143 |
| SLC6A15       | 0.21089002  | 0.20739016 | 1.59998630  |
| RP11-167P23.2 | -0.21087652 | 0.20741415 | -1.59987909 |
| SLC25A11      | 0.21078719  | 0.20767887 | 1.59916982  |
| ZNF648        | -0.21074880 | 0.20775157 | -1.59886501 |
| TBC1D17       | -0.21075390 | 0.20775157 | -1.59890556 |
| UGT2A3        | -0.21074648 | 0.20775157 | -1.59884662 |
| ALDH2         | 0.21072420  | 0.20780347 | 1.59866976  |
| VSIG8         | -0.21070638 | 0.20783102 | -1.59852826 |
| TAS2R7        | -0.21070365 | 0.20783102 | -1.59850661 |
| WDR74         | 0.21062649  | 0.20805740 | 1.59789403  |
| LOC203510     | -0.21059926 | 0.20812511 | -1.59767786 |
| ARL4A         | 0.21052348  | 0.20832882 | 1.59707630  |
| UMODL1        | -0.21052335 | 0.20832882 | -1.59707528 |
| FBXO39        | -0.21049733 | 0.20839275 | -1.59686869 |
| RRM1          | 0.21049013  | 0.20839674 | 1.59681160  |
| PIK3R2        | -0.21044965 | 0.20848781 | -1.59649025 |
| PURA          | 0.21045232  | 0.20848781 | 1.59651146  |
| LLPH          | 0.21043218  | 0.20852451 | 1.59635162  |
| MBD2          | 0.21040236  | 0.20860058 | 1.59611491  |
| KLRK1         | 0.21038173  | 0.20864737 | 1.59595118  |
| ADRBK2        | 0.21037471  | 0.20865084 | 1.59589541  |
| FOXE1         | -0.21036358 | 0.20866738 | -1.59580705 |
| ATP6V0D2      | -0.21030927 | 0.20882153 | -1.59537601 |
| SLC39A2       | -0.21027776 | 0.20888410 | -1.59512594 |
| IMPDH2        | 0.21028081  | 0.20888410 | 1.59515012  |
| FANCB         | -0.21021592 | 0.20906241 | -1.59463510 |
| AXL           | -0.21020327 | 0.20908380 | -1.59453474 |
| RPS15AP25     | -0.21019067 | 0.20910505 | -1.59443476 |
| NEDD4L        | 0.21017297  | 0.20914258 | 1.59429427  |
| ANKHD1        | 0.21012230  | 0.20928535 | 1.59389216  |
| LRRC29        | -0.21009621 | 0.20931176 | -1.59368512 |
| MSH4          | -0.21010379 | 0.20931176 | -1.59374529 |
| CROP          | 0.21009704  | 0.20931176 | 1.59369165  |
| CCDC66        | 0.21006456  | 0.20937490 | 1.59343396  |
| RPP25         | -0.21006461 | 0.20937490 | -1.59343435 |
| ERH           | 0.21002273  | 0.20947057 | 1.59310202  |
| WNT2          | -0.21002339 | 0.20947057 | -1.59310720 |
| PSMD8         | 0.21000574  | 0.20950589 | 1.59296716  |
| IL26          | -0.20998555 | 0.20955141 | -1.59280699 |
| SOX15         | -0.20993123 | 0.20968707 | -1.59237592 |
| PNMA6A        | -0.20993480 | 0.20968707 | -1.59240430 |
| CLCN4         | -0.20990615 | 0.20973661 | -1.59217693 |
| FBXL2         | 0.20990386  | 0.20973661 | 1.59215872  |

|              |             |            |             |
|--------------|-------------|------------|-------------|
| GNAS         | -0.20988632 | 0.20977370 | -1.59201958 |
| GRPR         | -0.20987138 | 0.20979789 | -1.59190101 |
| MCM3AP       | 0.20986688  | 0.20979789 | 1.59186532  |
| HEXIM1       | 0.20984787  | 0.20983970 | 1.59171449  |
| CCDC58       | 0.20982688  | 0.20988785 | 1.59154793  |
| MOSPD1       | 0.20981991  | 0.20989113 | 1.59149267  |
| PDIA3P       | 0.20980169  | 0.20990918 | 1.59134812  |
| C12orf26     | 0.20980296  | 0.20990918 | 1.59135813  |
| IQGAP1       | 0.20979646  | 0.20990918 | 1.59130663  |
| IFFO1        | -0.20975588 | 0.21002004 | -1.59098459 |
| DHX57        | 0.20966886  | 0.21027958 | 1.59029425  |
| CFTR         | 0.20964295  | 0.21034358 | 1.59008863  |
| LUC7L2       | 0.20961382  | 0.21040689 | 1.58985754  |
| LOC654780    | -0.20961131 | 0.21040689 | -1.58983765 |
| NPC1L1       | -0.20956872 | 0.21052434 | -1.58949980 |
| SIGLEC14     | -0.20955460 | 0.21052536 | -1.58938775 |
| ACOT7        | -0.20954466 | 0.21052536 | -1.58930894 |
| PROKR2       | -0.20956122 | 0.21052536 | -1.58944026 |
| GYPE         | -0.20954505 | 0.21052536 | -1.58931199 |
| PRR15        | 0.20951813  | 0.21059136 | 1.58909849  |
| SLC26A2      | 0.20949927  | 0.21063280 | 1.58894887  |
| TMEM174      | -0.20946724 | 0.21071648 | -1.58869480 |
| RAB12        | 0.20944235  | 0.21074442 | 1.58849733  |
| N4BP3        | -0.20944660 | 0.21074442 | -1.58853106 |
| LMLN         | 0.20944073  | 0.21074442 | 1.58848445  |
| SOS1         | 0.20942681  | 0.21077003 | 1.58837405  |
| GBP5         | 0.20940089  | 0.21083412 | 1.58816849  |
| LOC150622    | -0.20934462 | 0.21098535 | -1.58772211 |
| NINJ2        | -0.20934190 | 0.21098535 | -1.58770051 |
| LOC100131581 | 0.20932826  | 0.21100729 | 1.58759236  |
| ESF1         | 0.20932319  | 0.21100729 | 1.58755217  |
| PRR5         | -0.20923580 | 0.21126889 | -1.58685898 |
| ELA3B        | -0.20921710 | 0.21129082 | -1.58671069 |
| IGSF3        | 0.20922072  | 0.21129082 | 1.58673938  |
| SPATA5       | 0.20913073  | 0.21151871 | 1.58602571  |
| IL1F6        | -0.20912839 | 0.21151871 | -1.58600716 |
| ICAM1        | -0.20913094 | 0.21151871 | -1.58602734 |
| PRELP        | -0.20909303 | 0.21161335 | -1.58572670 |
| IRF9         | 0.20905807  | 0.21170152 | 1.58544946  |
| LRRC4C       | -0.20905375 | 0.21170152 | -1.58541519 |
| NDRG1        | -0.20902382 | 0.21177874 | -1.58517782 |
| GSTA4        | 0.20900923  | 0.21178748 | 1.58506217  |
| PHEX         | 0.20901156  | 0.21178748 | 1.58508063  |
| PCGF5        | 0.20899869  | 0.21180231 | 1.58497857  |
| FAM169B      | -0.20893812 | 0.21197817 | -1.58449828 |
| LOC100133091 | -0.20889325 | 0.21210358 | -1.58414246 |
| MYST4        | 0.20888227  | 0.21211986 | 1.58405534  |
| OR6C2        | -0.20885094 | 0.21220166 | -1.58380696 |
| CDK5         | -0.20868387 | 0.21272140 | -1.58248224 |
| ATPBD3       | -0.20866954 | 0.21274847 | -1.58236868 |

|              |             |            |             |     |
|--------------|-------------|------------|-------------|-----|
| CEP135       | 0.20864763  | 0.21280006 | 1.58219493  |     |
| SLC13A4      | -0.20863441 | 0.21282356 | -1.58209016 |     |
| CROCCL2      | -0.20862847 | 0.21282358 | -1.58204306 |     |
| ADRB3        | -0.20862142 | 0.21282717 | -1.58198716 |     |
| PARS2        | -0.20860088 | 0.21285518 | -1.58182429 |     |
| NPHP1        | 0.20860279  | 0.21285518 | 1.58183948  |     |
| ME3          | 0.20858648  | 0.21288250 | 1.58171017  |     |
| C4orf45      | -0.20856653 | 0.21292777 | -1.58155200 |     |
| ZNF451       | 0.20854868  | 0.21296627 | 1.58141045  |     |
| BCDIN3D      | 0.20851447  | 0.21303843 | 1.58113930  |     |
| SBF2         | 0.20851828  | 0.21303843 | 1.58116947  |     |
| MCTP2        | 0.20850663  | 0.21304459 | 1.58107714  |     |
| SPATA6       | 0.20849304  | 0.21306934 | 1.58096937  |     |
| NR3C1        | 0.20846150  | 0.21315210 | 1.58071934  |     |
| PITRM1       | 0.20841120  | 0.21318136 | 1.58032060  |     |
| MGEA5        | 0.20841686  | 0.21318136 | 1.58036549  |     |
| SLCO6A1      | -0.20841247 | 0.21318136 | -1.58033066 |     |
| TAS2R3       | 0.20841091  | 0.21318136 | 1.58031836  |     |
| NIN          | 0.20841386  | 0.21318136 | 1.58034167  |     |
| EPB41L4A     | 0.20844541  | 0.21318136 | 1.58059183  |     |
| KLF4         | 0.20842784  | 0.21318136 | 1.58045254  |     |
| GBAP         | 0.20835712  | 0.21333610 | 1.57989195  |     |
| LOC100130815 | -0.20833251 | 0.21339651 | -1.57969685 |     |
| RANBP2       | 0.20831375  | 0.21343800 | 1.57954818  |     |
| CD160        | -0.20830137 | 0.21345885 | -1.57945006 |     |
| OR10H2       | -0.20826208 | 0.21352521 | -1.57913863 |     |
| HDDC3        | -0.20826595 | 0.21352521 | -1.57916930 |     |
| PCDHA7       | -0.20825332 | 0.21352521 | -1.57906915 |     |
| ZDHHC14      | -0.20827265 | 0.21352521 | -1.57922239 |     |
| PGBD1        | -0.20825121 | 0.21352521 | -1.57905242 |     |
| FMO4         | 0.20821779  | 0.21361415 | 1.57878759  |     |
| C1QTNF3      | -0.20821018 | 0.21361960 | -1.57872723 |     |
| CNGA1        | -0.20818757 | 0.21365438 | -1.57854807 |     |
| SMPD3        | 0.20819167  | 0.21365438 | 1.57858051  |     |
| C11orf80     | 0.20817902  | 0.21366288 | 1.57848025  |     |
| WNT4         | -0.20816635 | 0.21368468 | -1.57837988 |     |
| PTPN9        | 0.20810854  | 0.21385266 | 1.57792171  |     |
| GIF          | -0.20810223 | 0.21385390 | -1.57787168 |     |
| TMEM33       | 0.20808403  | 0.21389366 | 1.57772741  |     |
| KRT9         | -0.20806240 | 0.21394453 | -1.57755597 |     |
| XPNPEP3      | 0.20799231  | 0.21415244 | 1.57700056  |     |
| ATG4A        | 0.20798302  | 0.21416334 | 1.57692690  |     |
| CBLL1        | 0.20796027  | 0.21421788 | 1.57674662  | yes |
| APPL1        | 0.20793106  | 0.21429339 | 1.57651511  |     |
| LOC85391     | 0.20791677  | 0.21432048 | 1.57640193  |     |
| SIN3B        | -0.20786454 | 0.21447072 | -1.57598799 |     |
| AURKB        | -0.20778765 | 0.21470107 | -1.57537877 |     |
| ZNF652       | -0.20776527 | 0.21475450 | -1.57520144 |     |
| RPL32P3      | 0.20771305  | 0.21490491 | 1.57478764  |     |
| BATF2        | -0.20764971 | 0.21497588 | -1.57428574 |     |

|           |             |            |             |     |
|-----------|-------------|------------|-------------|-----|
| TRBV5-1   | -0.20767090 | 0.21497588 | -1.57445366 |     |
| SHROOM2   | -0.20767716 | 0.21497588 | -1.57450327 |     |
| LOC442028 | -0.20765642 | 0.21497588 | -1.57433897 |     |
| PNOC      | -0.20767737 | 0.21497588 | -1.57450492 |     |
| SLC37A1   | 0.20765293  | 0.21497588 | 1.57431133  |     |
| C4orf16   | 0.20766418  | 0.21497588 | 1.57440041  |     |
| SLC29A4   | -0.20763360 | 0.21500896 | -1.57415813 |     |
| C8orf59   | 0.20762585  | 0.21501487 | 1.57409674  |     |
| E2F2      | -0.20758091 | 0.21504537 | -1.57374065 |     |
| PPIL6     | 0.20759111  | 0.21504537 | 1.57382152  |     |
| TM4SF1    | 0.20760660  | 0.21504537 | 1.57394425  |     |
| C15orf39  | -0.20758985 | 0.21504537 | -1.57381147 |     |
| FAM160B2  | -0.20758233 | 0.21504537 | -1.57375190 |     |
| CRTC3     | -0.20759645 | 0.21504537 | -1.57386378 |     |
| GLT8D4    | -0.20757117 | 0.21505774 | -1.57366353 |     |
| C10orf63  | 0.20753715  | 0.21514909 | 1.57339399  |     |
| GJB4      | -0.20749722 | 0.21524038 | -1.57307768 |     |
| SYT9      | -0.20749959 | 0.21524038 | -1.57309641 |     |
| C2orf15   | 0.20747054  | 0.21530791 | 1.57286629  |     |
| CALCOCO1  | -0.20745959 | 0.21532426 | -1.57277953 |     |
| NARG1L    | 0.20745308  | 0.21532616 | 1.57272796  |     |
| HCN4      | -0.20743648 | 0.21536068 | -1.57259647 |     |
| BBX       | 0.20742475  | 0.21536068 | 1.57250354  |     |
| RAB6A     | 0.20742469  | 0.21536068 | 1.57250310  |     |
| IMP4      | 0.20741728  | 0.21536552 | 1.57244436  |     |
| KRTAP12-3 | -0.20738832 | 0.21539036 | -1.57221496 |     |
| MAGEA4    | -0.20737704 | 0.21539036 | -1.57212562 |     |
| OR4Q3     | -0.20737314 | 0.21539036 | -1.57209471 |     |
| PGD       | 0.20739753  | 0.21539036 | 1.57228787  |     |
| SNORD20   | 0.20737406  | 0.21539036 | 1.57210196  |     |
| MYO1G     | 0.20736819  | 0.21539036 | 1.57205545  |     |
| ZNF577    | -0.20737610 | 0.21539036 | -1.57211817 |     |
| RNU5E     | -0.20735442 | 0.21541588 | -1.57194642 |     |
| ZNF643    | -0.20726927 | 0.21565937 | -1.57127186 |     |
| PANK3     | 0.20726777  | 0.21565937 | 1.57126002  |     |
| PAGE2     | -0.20725893 | 0.21566889 | -1.57118998 |     |
| TUBG2     | -0.20724991 | 0.21567896 | -1.57111856 |     |
| OR2G3     | -0.20721596 | 0.21577025 | -1.57084962 |     |
| B3GALTL   | 0.20719808  | 0.21580922 | 1.57070798  |     |
| LOXL1     | -0.20717255 | 0.21587310 | -1.57050577 |     |
| NOTCH3    | -0.20716656 | 0.21587332 | -1.57045834 |     |
| MGC45922  | -0.20714915 | 0.21591075 | -1.57032045 |     |
| KIAA1432  | 0.20712551  | 0.21596849 | 1.57013322  |     |
| OR2Y1     | -0.20708500 | 0.21608126 | -1.56981234 |     |
| KRTAP5-1  | -0.20703338 | 0.21622525 | -1.56940349 |     |
| NDRG3     | 0.20702900  | 0.21622525 | 1.56936885  |     |
| PHKA1     | 0.20698485  | 0.21631362 | 1.56901914  |     |
| ZNF823    | 0.20698415  | 0.21631362 | 1.56901365  | yes |
| CAPNS2    | 0.20699330  | 0.21631362 | 1.56908613  |     |
| DUSP13    | -0.20696966 | 0.21634158 | -1.56889889 |     |

|              |             |            |             |     |
|--------------|-------------|------------|-------------|-----|
| MAK          | 0.20693200  | 0.21644517 | 1.56860062  |     |
| UBIAD1       | -0.20691736 | 0.21645432 | -1.56848467 |     |
| KRT76        | -0.20692249 | 0.21645432 | -1.56852534 |     |
| GATA2        | -0.20689399 | 0.21650405 | -1.56829960 |     |
| HRK          | -0.20689028 | 0.21650405 | -1.56827025 |     |
| PDPN         | -0.20685676 | 0.21651689 | -1.56800476 |     |
| MUCL1        | 0.20687001  | 0.21651689 | 1.56810974  |     |
| WDR66        | 0.20686879  | 0.21651689 | 1.56810008  |     |
| HSPA4L       | 0.20686112  | 0.21651689 | 1.56803931  | yes |
| TUBA1A       | 0.20686026  | 0.21651689 | 1.56803252  |     |
| RNF10        | 0.20682076  | 0.21661508 | 1.56771975  |     |
| LILRA2       | -0.20681107 | 0.21662742 | -1.56764296 |     |
| MXI1         | -0.20679975 | 0.21663508 | -1.56755330 |     |
| CCDC102B     | -0.20679689 | 0.21663508 | -1.56753067 |     |
| ADCK2        | 0.20676744  | 0.21671193 | 1.56729746  |     |
| CCDC146      | 0.20675907  | 0.21671992 | 1.56723125  |     |
| AXIN1        | -0.20672689 | 0.21680573 | -1.56697640 |     |
| PRRC1        | 0.20662674  | 0.21711377 | 1.56618336  |     |
| SERPINE1     | -0.20660264 | 0.21717322 | -1.56599260 |     |
| NSMCE4A      | 0.20655475  | 0.21728343 | 1.56561341  |     |
| CHD7         | 0.20656201  | 0.21728343 | 1.56567088  | yes |
| WRN          | 0.20655120  | 0.21728343 | 1.56558533  |     |
| LRRTM1       | -0.20651533 | 0.21738146 | -1.56530131 |     |
| C1orf190     | -0.20650927 | 0.21738194 | -1.56525329 |     |
| SLC48A1      | -0.20644714 | 0.21756597 | -1.56476145 |     |
| FBXO41       | -0.20642911 | 0.21760566 | -1.56461867 |     |
| FAM19A2      | -0.20640344 | 0.21765174 | -1.56441546 |     |
| JMJD2D       | -0.20640320 | 0.21765174 | -1.56441362 |     |
| APBA1        | -0.20638901 | 0.21767887 | -1.56430122 |     |
| C18orf10     | 0.20629339  | 0.21795237 | 1.56354424  |     |
| ANKRD16      | 0.20629882  | 0.21795237 | 1.56358726  |     |
| NR2F1        | -0.20628781 | 0.21795237 | -1.56350011 |     |
| ACTR1A       | 0.20626325  | 0.21801351 | 1.56330566  |     |
| CCDC117      | 0.20622846  | 0.21810822 | 1.56303028  |     |
| CCDC150      | -0.20615244 | 0.21831886 | -1.56242854 |     |
| SDHB         | 0.20615412  | 0.21831886 | 1.56244185  |     |
| PPARGC1A     | -0.20609015 | 0.21850399 | -1.56193549 |     |
| LOC100130967 | -0.20607480 | 0.21853446 | -1.56181404 |     |
| FLNA         | -0.20606903 | 0.21853446 | -1.56176838 |     |
| SLC16A13     | 0.20601872  | 0.21868034 | 1.56137016  |     |
| FOXN3        | 0.20599331  | 0.21874441 | 1.56116904  |     |
| DEFB114      | -0.20595448 | 0.21883350 | -1.56086171 |     |
| CXorf27      | -0.20595438 | 0.21883350 | -1.56086089 |     |
| GPX3         | -0.20594647 | 0.21884004 | -1.56079831 |     |
| UNC119B      | 0.20593991  | 0.21884215 | 1.56074639  |     |
| FAM92A2      | -0.20592368 | 0.21887605 | -1.56061797 |     |
| RPS23        | 0.20588954  | 0.21896887 | 1.56034779  |     |
| PARP11       | 0.20586181  | 0.21904065 | 1.56012829  |     |
| STK33        | 0.20585508  | 0.21904332 | 1.56007503  |     |
| AQP4         | 0.20583405  | 0.21907355 | 1.55990865  |     |

|              |             |            |             |
|--------------|-------------|------------|-------------|
| SLCO2A1      | -0.20583550 | 0.21907355 | -1.55992011 |
| MUPCDH       | -0.20582382 | 0.21908776 | -1.55982765 |
| LOC100129396 | 0.20581294  | 0.21910409 | 1.55974156  |
| PGC          | -0.20577485 | 0.21920998 | -1.55944013 |
| PIK3C2A      | 0.20575682  | 0.21924984 | 1.55929749  |
| TAS2R41      | -0.20573293 | 0.21930901 | -1.55910844 |
| TRAF3IP1     | 0.20571793  | 0.21933894 | 1.55898971  |
| C20orf195    | -0.20569578 | 0.21939239 | -1.55881447 |
| PRPF18       | 0.20562959  | 0.21959099 | 1.55829067  |
| CLSTN1       | 0.20561848  | 0.21960811 | 1.55820276  |
| HLA-DQB1     | 0.20558638  | 0.21969440 | 1.55794880  |
| PCDHGB3      | -0.20553427 | 0.21984674 | -1.55753647 |
| ARPC5L       | 0.20552250  | 0.21985657 | 1.55744336  |
| SH3BGRL3     | -0.20551945 | 0.21985657 | -1.55741923 |
| GAF3         | -0.20548823 | 0.21990102 | -1.55717216 |
| BTBD7        | 0.20549225  | 0.21990102 | 1.55720399  |
| SLC25A20     | 0.20549060  | 0.21990102 | 1.55719091  |
| CYorf15A     | 0.20546928  | 0.21994399 | 1.55702231  |
| PPAN         | -0.20539979 | 0.22015384 | -1.55647245 |
| FSCN3        | -0.20534745 | 0.22030713 | -1.55605841 |
| SEC22A       | 0.20533596  | 0.22032553 | 1.55596751  |
| CYS1         | -0.20532403 | 0.22034541 | -1.55587309 |
| ZNF671       | -0.20528469 | 0.22045582 | -1.55556193 |
| ARPP-19      | 0.20526707  | 0.22049450 | 1.55542252  |
| GTSF1L       | -0.20524491 | 0.22053084 | -1.55524718 |
| IFRG15       | 0.20524424  | 0.22053084 | 1.55524190  |
| VWF          | -0.20523103 | 0.22055497 | -1.55513736 |
| HEYL         | -0.20520578 | 0.22061887 | -1.55493765 |
| C11orf39     | -0.20518781 | 0.22062870 | -1.55479547 |
| PCSK4        | -0.20518806 | 0.22062870 | -1.55479748 |
| WDR54        | 0.20518506  | 0.22062870 | 1.55477372  |
| SLC6A8       | -0.20517789 | 0.22063282 | -1.55471706 |
| R3HCC1       | -0.20512456 | 0.22078962 | -1.55429520 |
| GAGE1        | -0.20507097 | 0.22092777 | -1.55387131 |
| CCHCR1       | -0.20507267 | 0.22092777 | -1.55388475 |
| TMEM201      | -0.20505591 | 0.22094029 | -1.55375212 |
| CCDC113      | 0.20505536  | 0.22094029 | 1.55374781  |
| C1orf9       | 0.20504347  | 0.22096005 | 1.55365379  |
| ANKRD11      | -0.20502131 | 0.22099863 | -1.55347846 |
| SCAND1       | -0.20501999 | 0.22099863 | -1.55346802 |
| ABCC2        | -0.20501270 | 0.22100317 | -1.55341037 |
| KIAA0040     | 0.20499774  | 0.22103312 | 1.55329203  |
| ZFY          | 0.20498104  | 0.22106309 | 1.55315995  |
| OR2H2        | -0.20497685 | 0.22106309 | -1.55312685 |
| OR51G1       | -0.20494392 | 0.22115254 | -1.55286638 |
| C10orf91     | -0.20491213 | 0.22123822 | -1.55261496 |
| SNORD115-15  | -0.20488609 | 0.22125756 | -1.55240899 |
| SLC46A1      | -0.20488157 | 0.22125756 | -1.55237321 |
| ITPR2        | -0.20487673 | 0.22125756 | -1.55233494 |
| MST1R        | 0.20488093  | 0.22125756 | 1.55236815  |

|              |             |            |             |     |
|--------------|-------------|------------|-------------|-----|
| SOD2         | 0.20489102  | 0.22125756 | 1.55244796  |     |
| TFDP1        | 0.20485864  | 0.22127832 | 1.55219187  |     |
| PYGO2        | -0.20486358 | 0.22127832 | -1.55223093 |     |
| ZNF626       | 0.20482144  | 0.22134280 | 1.55189765  |     |
| FLJ20674     | -0.20482495 | 0.22134280 | -1.55192542 |     |
| GIGYF1       | -0.20483095 | 0.22134280 | -1.55197293 |     |
| SNORD83A     | -0.20481386 | 0.22134832 | -1.55183773 |     |
| LRR1Q1       | 0.20476174  | 0.22150143 | 1.55142554  |     |
| MAP3K4       | 0.20472179  | 0.22161426 | 1.55110960  |     |
| PPAPDC1B     | 0.20471191  | 0.22162740 | 1.55103150  |     |
| IGFBP4       | -0.20470421 | 0.22163333 | -1.55097063 |     |
| PFKFB4       | -0.20466811 | 0.22173346 | -1.55068510 |     |
| HMGA2        | -0.20465118 | 0.22176999 | -1.55055126 |     |
| CPXM2        | -0.20461855 | 0.22185862 | -1.55029323 |     |
| SURF6        | -0.20460117 | 0.22189670 | -1.55015574 |     |
| AGTR2        | -0.20457953 | 0.22194887 | -1.54998468 |     |
| RAPGEF4      | -0.20456004 | 0.22195471 | -1.54983057 |     |
| RND1         | -0.20456999 | 0.22195471 | -1.54990926 |     |
| TTF2         | 0.20456127  | 0.22195471 | 1.54984031  |     |
| FBF1         | -0.20452943 | 0.22203670 | -1.54958851 |     |
| SLC16A14     | -0.20446578 | 0.22218104 | -1.54908521 |     |
| CLEC14A      | -0.20445050 | 0.22218104 | -1.54896440 | yes |
| KCTD4        | -0.20446965 | 0.22218104 | -1.54911585 |     |
| RASGRF2      | -0.20445309 | 0.22218104 | -1.54898491 |     |
| ZNF135       | -0.20446644 | 0.22218104 | -1.54909047 |     |
| TOX4         | 0.20445633  | 0.22218104 | 1.54901054  |     |
| CPXCR1       | -0.20444280 | 0.22218699 | -1.54890352 |     |
| ANGPTL4      | -0.20440666 | 0.22228739 | -1.54861779 |     |
| ALOX12       | -0.20438728 | 0.22229288 | -1.54846459 |     |
| ASB4         | -0.20438935 | 0.22229288 | -1.54848093 |     |
| CMIP         | 0.20439272  | 0.22229288 | 1.54850758  |     |
| EIF1AX       | 0.20437331  | 0.22230343 | 1.54835407  |     |
| UBAP2L       | 0.20437229  | 0.22230343 | 1.54834608  |     |
| KRT78        | -0.20433136 | 0.22241188 | -1.54802245 |     |
| MMS19        | 0.20432784  | 0.22241188 | 1.54799459  |     |
| TYW3         | 0.20429806  | 0.22249120 | 1.54775917  |     |
| IFNK         | -0.20425710 | 0.22260771 | -1.54743535 |     |
| RAD18        | 0.20420139  | 0.22277332 | 1.54699495  |     |
| BSG          | 0.20415476  | 0.22290882 | 1.54662631  |     |
| CXorf22      | 0.20414566  | 0.22291210 | 1.54655440  |     |
| ACAD10       | 0.20414196  | 0.22291210 | 1.54652512  |     |
| LOC100129038 | -0.20406241 | 0.22315725 | -1.54589629 |     |
| ALS2CR4      | 0.20404946  | 0.22318070 | 1.54579394  |     |
| SNORD116-28  | 0.20403185  | 0.22321969 | 1.54565470  |     |
| DSG2         | 0.20397294  | 0.22339627 | 1.54518909  |     |
| TMED8        | 0.20396702  | 0.22339634 | 1.54514223  |     |
| C1orf187     | -0.20391316 | 0.22355617 | -1.54471656 |     |
| GLRB         | -0.20389371 | 0.22360135 | -1.54456280 |     |
| C12orf54     | -0.20384285 | 0.22375128 | -1.54416084 |     |
| PHLDB1       | -0.20383501 | 0.22375772 | -1.54409889 |     |



|              |             |            |             |
|--------------|-------------|------------|-------------|
| ZNF813       | 0.20381147  | 0.22381657 | 1.54391280  |
| RPL23AP37    | -0.20377030 | 0.22391453 | -1.54358744 |
| APOBEC4      | 0.20377560  | 0.22391453 | 1.54362932  |
| GLT1D1       | -0.20374912 | 0.22394578 | -1.54342005 |
| SNORD61      | 0.20375011  | 0.22394578 | 1.54342785  |
| LOC100133425 | 0.20371760  | 0.22401156 | 1.54317096  |
| SCPEP1       | 0.20371899  | 0.22401156 | 1.54318195  |
| LGALS13      | -0.20366987 | 0.22415127 | -1.54279368 |
| ZNF549       | -0.20365368 | 0.22418559 | -1.54266578 |
| ATL2         | 0.20364404  | 0.22419806 | 1.54258961  |
| APOA5        | -0.20363122 | 0.22422115 | -1.54248829 |
| FSD2         | -0.20362116 | 0.22423503 | -1.54240879 |
| TTC21B       | 0.20361294  | 0.22424278 | 1.54234378  |
| SLC7A11      | 0.20359552  | 0.22428122 | 1.54220617  |
| CLEC7A       | -0.20357554 | 0.22432827 | -1.54204824 |
| MARCH9       | -0.20356054 | 0.22435864 | -1.54192975 |
| NFE2L3       | 0.20352008  | 0.22447416 | 1.54161001  |
| CERKL        | 0.20349836  | 0.22452703 | 1.54143838  |
| LOC440104    | -0.20346547 | 0.22461728 | -1.54117847 |
| AQP5         | -0.20344685 | 0.22465982 | -1.54103133 |
| EVC          | -0.20343138 | 0.22469180 | -1.54090912 |
| FAM127C      | -0.20338826 | 0.22481632 | -1.54056843 |
| GPC4         | 0.20338091  | 0.22482115 | 1.54051035  |
| PCGF6        | -0.20336820 | 0.22484391 | -1.54040994 |
| UBE4A        | 0.20334847  | 0.22489020 | 1.54025402  |
| DNAH5        | 0.20333705  | 0.22490866 | 1.54016377  |
| GNG10        | -0.20332093 | 0.22494283 | -1.54003646 |
| FLJ32682     | -0.20331188 | 0.22495337 | -1.53996493 |
| PIP4K2B      | -0.20330508 | 0.22495637 | -1.53991118 |
| CRCT1        | -0.20329787 | 0.22496074 | -1.53985421 |
| FBXL6        | -0.20328482 | 0.22498466 | -1.53975112 |
| THSD1        | -0.20326763 | 0.22502243 | -1.53961534 |
| TMEM104      | -0.20325762 | 0.22503621 | -1.53953618 |
| FKBP8        | -0.20323249 | 0.22510057 | -1.53933770 |
| USP54        | 0.20322387  | 0.22510969 | 1.53926955  |
| CEP27        | 0.20316957  | 0.22525204 | 1.53884055  |
| UTP14C       | 0.20317422  | 0.22525204 | 1.53887735  |
| CD276        | -0.20315477 | 0.22528184 | -1.53872366 |
| PPAT         | 0.20314699  | 0.22528814 | 1.53866216  |
| SPATA7       | 0.20307551  | 0.22550795 | 1.53809750  |
| NRBF2        | -0.20304536 | 0.22558927 | -1.53785932 |
| PENK         | -0.20303085 | 0.22561812 | -1.53774472 |
| LOC729627    | -0.20299504 | 0.22571847 | -1.53746183 |
| KAT2A        | -0.20294109 | 0.22587972 | -1.53703567 |
| LAMB2        | -0.20292784 | 0.22589361 | -1.53693098 |
| OR5K2        | -0.20291924 | 0.22589361 | -1.53686307 |
| CXorf57      | 0.20292326  | 0.22589361 | 1.53689484  |
| ROPN1L       | 0.20289585  | 0.22595232 | 1.53667831  |
| EGR2         | -0.20286809 | 0.22602573 | -1.53645900 |
| SMARCE1      | 0.20285888  | 0.22603681 | 1.53638632  |

|              |             |            |             |
|--------------|-------------|------------|-------------|
| TRBV28       | -0.20283020 | 0.22611331 | -1.53615978 |
| LGALS12      | -0.20279689 | 0.22620542 | -1.53589663 |
| TMEM119      | -0.20276060 | 0.22630754 | -1.53561000 |
| CNPY2        | -0.20273909 | 0.22634426 | -1.53544013 |
| PGBD3        | 0.20273611  | 0.22634426 | 1.53541663  |
| C6orf97      | 0.20273196  | 0.22634426 | 1.53538384  |
| EVL          | -0.20270823 | 0.22638436 | -1.53519638 |
| FBXO30       | 0.20271254  | 0.22638436 | 1.53523043  |
| C11orf64     | -0.20269556 | 0.22640711 | -1.53509630 |
| PCDHA4       | -0.20268777 | 0.22641343 | -1.53503484 |
| B3GNT9       | -0.20266980 | 0.22645402 | -1.53489290 |
| COL5A2       | -0.20265709 | 0.22647692 | -1.53479249 |
| FAM110C      | -0.20264949 | 0.22648261 | -1.53473251 |
| RPS26P39     | -0.20255465 | 0.22672223 | -1.53398353 |
| ADARB2       | -0.20255936 | 0.22672223 | -1.53402067 |
| HLA-DQA2     | -0.20255609 | 0.22672223 | -1.53399488 |
| FAM13B       | 0.20256145  | 0.22672223 | 1.53403722  |
| CST3         | -0.20249244 | 0.22691178 | -1.53349222 |
| SNORA37      | -0.20245597 | 0.22701473 | -1.53320421 |
| BRE          | 0.20243294  | 0.22707241 | 1.53302237  |
| TTRAP        | 0.20242246  | 0.22708783 | 1.53293962  |
| CXorf59      | 0.20234069  | 0.22730374 | 1.53229389  |
| RPS15AP17    | -0.20234588 | 0.22730374 | -1.53233488 |
| EFCAB1       | 0.20234128  | 0.22730374 | 1.53229862  |
| CCDC89       | 0.20232029  | 0.22731279 | 1.53213287  |
| KRTAP19-5    | -0.20232299 | 0.22731279 | -1.53215414 |
| C7orf49      | 0.20233143  | 0.22731279 | 1.53222083  |
| FANK1        | 0.20230972  | 0.22732852 | 1.53204942  |
| KCNT2        | -0.20227511 | 0.22742532 | -1.53177615 |
| KLRF1        | 0.20221976  | 0.22759212 | 1.53133908  |
| ANKRD18B     | 0.20220838  | 0.22760745 | 1.53124927  |
| RP3-402G11.5 | -0.20220341 | 0.22760745 | -1.53121003 |
| MFN2         | 0.20218260  | 0.22765777 | 1.53104567  |
| TIPIN        | 0.20217244  | 0.22767214 | 1.53096545  |
| PGS1         | 0.20213741  | 0.22777045 | 1.53068889  |
| ENOSF1       | 0.20210898  | 0.22783631 | 1.53046442  |
| MAPK1        | 0.20210610  | 0.22783631 | 1.53044168  |
| CALML5       | -0.20208352 | 0.22789262 | -1.53026343 |
| EFHB         | 0.20202932  | 0.22805574 | 1.52983554  |
| CMC1         | 0.20199868  | 0.22809944 | 1.52959368  |
| C9orf106     | -0.20200707 | 0.22809944 | -1.52965991 |
| SPANXN2      | -0.20200323 | 0.22809944 | -1.52962956 |
| LMO4         | 0.20198562  | 0.22812365 | 1.52949054  |
| C4orf26      | -0.20194784 | 0.22819376 | -1.52919231 |
| RPL22        | 0.20195627  | 0.22819376 | 1.52925889  |
| TMC7         | 0.20194717  | 0.22819376 | 1.52918701  |
| C5orf15      | 0.20192806  | 0.22821847 | 1.52903614  |
| hCG_1647286  | -0.20193385 | 0.22821847 | -1.52908185 |
| DIP2B        | 0.20188698  | 0.22833738 | 1.52871189  |
| DNPEP        | 0.20186812  | 0.22838119 | 1.52856302  |

|              |             |            |             |
|--------------|-------------|------------|-------------|
| PRTFDC1      | 0.20186073  | 0.22838623 | 1.52850468  |
| C14orf1      | 0.20183579  | 0.22845063 | 1.52830779  |
| EMP2         | 0.20182250  | 0.22847560 | 1.52820294  |
| LOC100128918 | -0.20175843 | 0.22861206 | -1.52769720 |
| C20orf151    | -0.20175515 | 0.22861206 | -1.52767125 |
| PHC2         | -0.20176652 | 0.22861206 | -1.52776105 |
| ANXA3        | 0.20174677  | 0.22861206 | 1.52760516  |
| APOC1        | -0.20174987 | 0.22861206 | -1.52762958 |
| REG1P        | -0.20176684 | 0.22861206 | -1.52776357 |
| TRIM22       | 0.20166467  | 0.22884692 | 1.52695716  |
| HMGB1L1      | -0.20165568 | 0.22884692 | -1.52688620 |
| CHCHD1       | 0.20166018  | 0.22884692 | 1.52692168  |
| SYNPO2       | -0.20165379 | 0.22884692 | -1.52687123 |
| TMC2         | -0.20164424 | 0.22885394 | -1.52679589 |
| FPR3         | 0.20163992  | 0.22885394 | 1.52676179  |
| ZNF716       | -0.20161752 | 0.22890983 | -1.52658495 |
| HIGD2BP      | -0.20157055 | 0.22902895 | -1.52621427 |
| CDH29        | 0.20157241  | 0.22902895 | 1.52622896  |
| SEMA3E       | -0.20152404 | 0.22916653 | -1.52584724 |
| NEO1         | 0.20148594  | 0.22925568 | 1.52554655  |
| C6orf162     | 0.20148650  | 0.22925568 | 1.52555099  |
| CD6          | -0.20142909 | 0.22942843 | -1.52509790 |
| EFCAB6       | 0.20142212  | 0.22943208 | 1.52504288  |
| TRIM16       | 0.20140181  | 0.22946946 | 1.52488259  |
| SERP1        | 0.20139930  | 0.22946946 | 1.52486281  |
| ZNF71        | -0.20139270 | 0.22947185 | -1.52481073 |
| ZNF676       | -0.20137483 | 0.22947612 | -1.52466969 |
| HSPA1L       | 0.20138036  | 0.22947612 | 1.52471335  |
| FLJ45964     | -0.20137375 | 0.22947612 | -1.52466122 |
| HBB          | -0.20136610 | 0.22948207 | -1.52460084 |
| PPOX         | 0.20134067  | 0.22952833 | 1.52440017  |
| SPRR2E       | -0.20134084 | 0.22952833 | -1.52440152 |
| SNORA73A     | -0.20133031 | 0.22954349 | -1.52431838 |
| TRIM6        | -0.20130419 | 0.22961212 | -1.52411224 |
| PGM1         | -0.20128752 | 0.22964864 | -1.52398077 |
| C17orf70     | -0.20127395 | 0.22967472 | -1.52387362 |
| BDKRB2       | 0.20126041  | 0.22970063 | 1.52376685  |
| DEPDC7       | -0.20124675 | 0.22972701 | -1.52365900 |
| GREM2        | -0.20122784 | 0.22977119 | -1.52350979 |
| TLE3         | -0.20121582 | 0.22979196 | -1.52341499 |
| STX2         | 0.20119476  | 0.22982346 | 1.52324877  |
| ZNF841       | 0.20119632  | 0.22982346 | 1.52326113  |
| ANGPTL2      | -0.20117515 | 0.22984211 | -1.52309404 |
| FAM154B      | 0.20117351  | 0.22984211 | 1.52308111  |
| ZMAT3        | 0.20117159  | 0.22984211 | 1.52306594  |
| TTC5         | 0.20115722  | 0.22987086 | 1.52295263  |
| CPA2         | -0.20114112 | 0.22990555 | -1.52282553 |
| SOX4         | -0.20113462 | 0.22990760 | -1.52277429 |
| CCAR1        | 0.20111888  | 0.22994103 | 1.52265010  |
| LOC441046    | -0.20107989 | 0.23005345 | -1.52234242 |

|              |             |            |             |
|--------------|-------------|------------|-------------|
| KIAA1656     | -0.20105827 | 0.23010685 | -1.52217190 |
| UQCRFSL1     | 0.20105137  | 0.23011028 | 1.52211744  |
| AXUD1        | -0.20103430 | 0.23014827 | -1.52198275 |
| ERGIC3       | 0.20100045  | 0.23024326 | 1.52171568  |
| LOC100133338 | 0.20098562  | 0.23024925 | 1.52159870  |
| MKS1         | 0.20098337  | 0.23024925 | 1.52158099  |
| KRTAP24-1    | -0.20098102 | 0.23024925 | -1.52156238 |
| KIAA1586     | 0.20095113  | 0.23033079 | 1.52132660  |
| EMR3         | -0.20093565 | 0.23036338 | -1.52120450 |
| DYNC1H1      | 0.20091603  | 0.23039004 | 1.52104972  |
| DDAH2        | -0.20091996 | 0.23039004 | -1.52108066 |
| SHPK         | 0.20090216  | 0.23041718 | 1.52094027  |
| MCART3P      | -0.20088997 | 0.23043860 | -1.52084410 |
| CCDC120      | -0.20087029 | 0.23048550 | -1.52068882 |
| TLR8         | -0.20081989 | 0.23063688 | -1.52029123 |
| THAP6        | 0.20080219  | 0.23067706 | 1.52015160  |
| TRAPPC10     | 0.20077487  | 0.23074995 | 1.51993614  |
| ZNF345       | 0.20076853  | 0.23075151 | 1.51988608  |
| SYNGR1       | -0.20076065 | 0.23075826 | -1.51982398 |
| PHC3         | 0.20075188  | 0.23076809 | 1.51975474  |
| SH2D7        | -0.20074500 | 0.23077070 | -1.51970051 |
| BAT4         | -0.20073934 | 0.23077070 | -1.51965583 |
| H2AFZ        | 0.20073104  | 0.23077889 | 1.51959041  |
| OR52L1       | -0.20063420 | 0.23108852 | -1.51882652 |
| KCTD6        | 0.20060253  | 0.23117633 | 1.51857674  |
| OR9A4        | -0.20058629 | 0.23119155 | -1.51844863 |
| ERF          | -0.20058977 | 0.23119155 | -1.51847609 |
| MED24        | 0.20057377  | 0.23121414 | 1.51834989  |
| BRUNOL6      | -0.20054900 | 0.23127849 | -1.51815451 |
| RASSF1       | -0.20048882 | 0.23145926 | -1.51767989 |
| TIGD4        | 0.20048419  | 0.23145926 | 1.51764335  |
| USP5         | 0.20044792  | 0.23156285 | 1.51735732  |
| CCDC21       | 0.20043431  | 0.23158919 | 1.51724999  |
| OBSCN        | -0.20041339 | 0.23164046 | -1.51708500 |
| HIST1H4F     | 0.20039502  | 0.23168308 | 1.51694006  |
| MRAP2        | 0.20036166  | 0.23174462 | 1.51667700  |
| PGM5         | -0.20035942 | 0.23174462 | -1.51665937 |
| FBXO42       | 0.20035343  | 0.23174462 | 1.51661210  |
| XPA          | 0.20035836  | 0.23174462 | 1.51665101  |
| LOC168474    | -0.20032932 | 0.23178672 | -1.51642195 |
| MTHFD1       | 0.20033054  | 0.23178672 | 1.51643156  |
| PICALM       | 0.20029770  | 0.23187453 | 1.51617265  |
| RP1          | 0.20029171  | 0.23187490 | 1.51612537  |
| LRIT2        | -0.20025047 | 0.23199559 | -1.51580017 |
| RPL12        | 0.20019731  | 0.23213694 | 1.51538095  |
| SCRN3        | 0.20019892  | 0.23213694 | 1.51539366  |
| SIRT1        | 0.20016854  | 0.23221510 | 1.51515412  |
| PLEKHA1      | 0.20013846  | 0.23229777 | 1.51491695  |
| CAPN6        | -0.20009499 | 0.23242624 | -1.51457418 |
| DHCR24       | 0.20007209  | 0.23248441 | 1.51439362  |

|              |             |            |             |     |
|--------------|-------------|------------|-------------|-----|
| AKAP9        | 0.20005512  | 0.23252233 | 1.51425976  |     |
| MUC1         | 0.20004109  | 0.23255016 | 1.51414918  |     |
| CCNYL2       | -0.20001724 | 0.23261160 | -1.51396113 |     |
| EFCAB10      | 0.19997891  | 0.23270248 | 1.51365886  |     |
| C21orf59     | 0.19998393  | 0.23270248 | 1.51369845  |     |
| MAP3K7IP2    | 0.19996929  | 0.23271525 | 1.51358303  |     |
| CDH5         | -0.19996017 | 0.23272630 | -1.51351115 |     |
| DNM1         | -0.19994842 | 0.23274066 | -1.51341852 |     |
| SRM          | -0.19994420 | 0.23274066 | -1.51338526 |     |
| AKR1A1       | 0.19990367  | 0.23282678 | 1.51306569  |     |
| NUB1         | 0.19990831  | 0.23282678 | 1.51310228  |     |
| DBNDD2       | -0.19989550 | 0.23282678 | -1.51300127 |     |
| RP9          | -0.19989830 | 0.23282678 | -1.51302337 |     |
| HMHA1        | -0.19988300 | 0.23284943 | -1.51290269 |     |
| RPL29P8      | -0.19987109 | 0.23284989 | -1.51280886 |     |
| SLC22A24     | -0.19987166 | 0.23284989 | -1.51281335 |     |
| PSPH         | 0.19984853  | 0.23290698 | 1.51263097  |     |
| C7orf62      | -0.19979180 | 0.23306094 | -1.51218370 |     |
| SP2          | -0.19979427 | 0.23306094 | -1.51220317 |     |
| KLHL26       | -0.19977501 | 0.23308131 | -1.51205136 |     |
| TLE6         | -0.19977408 | 0.23308131 | -1.51204404 |     |
| CD22         | -0.19976805 | 0.23308182 | -1.51199648 | yes |
| PPPDE2       | -0.19974842 | 0.23312890 | -1.51184174 |     |
| TMEM194A     | 0.19972024  | 0.23320528 | 1.51161958  |     |
| NEK10        | 0.19970230  | 0.23324658 | 1.51147819  |     |
| GGH          | 0.19969193  | 0.23326196 | 1.51139642  |     |
| PHF5A        | -0.19964957 | 0.23338694 | -1.51106255 |     |
| CPB1         | -0.19963961 | 0.23339913 | -1.51098403 |     |
| APOB48R      | -0.19962837 | 0.23339913 | -1.51089541 |     |
| RBL1         | 0.19962876  | 0.23339913 | 1.51089850  |     |
| BIRC5        | -0.19962098 | 0.23340431 | -1.51083715 |     |
| KCTD1        | 0.19960774  | 0.23342952 | 1.51073281  |     |
| CYP4B1       | 0.19957455  | 0.23352315 | 1.51047117  |     |
| GAS2         | -0.19955803 | 0.23353173 | -1.51034090 |     |
| GDF5OS       | -0.19956259 | 0.23353173 | -1.51037687 |     |
| ZNF74        | -0.19955441 | 0.23353173 | -1.51031237 |     |
| ZNF367       | -0.19952071 | 0.23362710 | -1.51004680 |     |
| LOC100129191 | -0.19951409 | 0.23362964 | -1.50999462 |     |
| INSRR        | -0.19948763 | 0.23370022 | -1.50978607 |     |
| S100A1L      | 0.19944876  | 0.23380504 | 1.50947964  |     |
| TMCO4        | 0.19944532  | 0.23380504 | 1.50945253  |     |
| ITPK1        | -0.19942886 | 0.23384132 | -1.50932285 |     |
| SMCP         | -0.19940731 | 0.23389512 | -1.50915296 |     |
| HRNR         | -0.19937304 | 0.23399257 | -1.50888284 |     |
| RPS12P9      | -0.19934549 | 0.23406696 | -1.50866574 |     |
| RDH5         | -0.19932135 | 0.23412965 | -1.50847552 |     |
| HEXIM2       | -0.19929526 | 0.23419906 | -1.50826988 |     |
| CAMP         | -0.19928747 | 0.23420565 | -1.50820845 |     |
| PLP2         | 0.19925623  | 0.23429274 | 1.50796231  |     |
| C19orf52     | -0.19922758 | 0.23437099 | -1.50773650 |     |

|              |             |            |             |     |
|--------------|-------------|------------|-------------|-----|
| THNSL2       | 0.19921679  | 0.23438786 | 1.50765148  |     |
| RPLP1        | 0.19920979  | 0.23439172 | 1.50759630  |     |
| SMR3A        | -0.19919636 | 0.23441767 | -1.50749046 |     |
| CD1D         | -0.19914191 | 0.23458465 | -1.50706136 |     |
| TMC1         | -0.19912169 | 0.23461373 | -1.50690206 |     |
| ALAS2        | -0.19912434 | 0.23461373 | -1.50692289 |     |
| ROBLD3       | -0.19908102 | 0.23473340 | -1.50658154 |     |
| ZNF717       | 0.19905890  | 0.23478927 | 1.50640724  |     |
| SMC2         | 0.19903857  | 0.23479854 | 1.50624706  |     |
| FAM76A       | 0.19904327  | 0.23479854 | 1.50628411  |     |
| EFCAB4A      | -0.19904932 | 0.23479854 | -1.50633178 |     |
| NINJ1        | -0.19899019 | 0.23494479 | -1.50586584 |     |
| ZNF138       | 0.19898116  | 0.23495566 | 1.50579464  |     |
| OR5AR1       | -0.19896953 | 0.23496991 | -1.50570302 |     |
| DAAM1        | 0.19895938  | 0.23496991 | 1.50562306  |     |
| AKR7A2       | 0.19896518  | 0.23496991 | 1.50566880  |     |
| GPX4         | 0.19894916  | 0.23498332 | 1.50554256  |     |
| RBM38        | -0.19894373 | 0.23498332 | -1.50549976 |     |
| SEC63        | 0.19890615  | 0.23508019 | 1.50520367  |     |
| SMOC2        | -0.19890384 | 0.23508019 | -1.50518543 |     |
| ARF6         | -0.19889774 | 0.23508094 | -1.50513741 |     |
| ASB15        | -0.19888266 | 0.23510041 | -1.50501856 |     |
| LCORL        | 0.19887791  | 0.23510041 | 1.50498116  |     |
| GUSBL2       | 0.19887446  | 0.23510041 | 1.50495396  |     |
| RRP1B        | 0.19885613  | 0.23514329 | 1.50480955  |     |
| ARHGEF17     | -0.19884733 | 0.23515336 | -1.50474021 |     |
| LIPN         | -0.19883157 | 0.23518740 | -1.50461604 |     |
| DENND3       | -0.19881185 | 0.23519109 | -1.50446065 |     |
| SCGB2A1      | 0.19882112  | 0.23519109 | 1.50453373  |     |
| ZFP106       | 0.19880700  | 0.23519109 | 1.50442249  |     |
| NAT11        | 0.19881536  | 0.23519109 | 1.50448831  |     |
| OSBPL7       | -0.19878904 | 0.23521251 | -1.50428092 |     |
| RUNX3        | -0.19879460 | 0.23521251 | -1.50432474 |     |
| SNCA         | 0.19872269  | 0.23542080 | 1.50375825  |     |
| LOC391081    | -0.19871501 | 0.23542704 | -1.50369770 |     |
| DDX25        | -0.19870676 | 0.23543523 | -1.50363272 |     |
| BHMT2        | -0.19868812 | 0.23547922 | -1.50348587 |     |
| ABCC11       | -0.19867560 | 0.23550213 | -1.50338722 |     |
| BTBD11       | 0.19865626  | 0.23554853 | 1.50323490  |     |
| EIF2AK4      | 0.19858550  | 0.23577224 | 1.50267749  |     |
| ZFC3H1       | 0.19857513  | 0.23578775 | 1.50259580  |     |
| NBEA         | 0.19856181  | 0.23579319 | 1.50249084  |     |
| OR11G2       | -0.19856661 | 0.23579319 | -1.50252865 |     |
| LOC100131402 | 0.19850901  | 0.23595509 | 1.50207491  |     |
| CHD4         | 0.19848930  | 0.23600282 | 1.50191970  |     |
| TRGV8        | 0.19848319  | 0.23600365 | 1.50187153  |     |
| HBE1         | -0.19844661 | 0.23610964 | -1.50158340 |     |
| C11orf30     | 0.19843851  | 0.23611732 | 1.50151961  | yes |
| LOC100131756 | -0.19842317 | 0.23615002 | -1.50139875 |     |
| IRS1         | -0.19840430 | 0.23619489 | -1.50125012 |     |

|              |             |            |             |     |
|--------------|-------------|------------|-------------|-----|
| JMJD1A       | 0.19837766  | 0.23624632 | 1.50104031  |     |
| C5orf42      | 0.19838058  | 0.23624632 | 1.50106332  |     |
| ZNF675       | 0.19832362  | 0.23638092 | 1.50061462  |     |
| SERPINB9     | 0.19833272  | 0.23638092 | 1.50068630  |     |
| ZNF654       | 0.19832108  | 0.23638092 | 1.50059462  |     |
| ZNF826       | -0.19829808 | 0.23644008 | -1.50041350 |     |
| PVRL4        | 0.19828200  | 0.23647536 | 1.50028683  |     |
| GUCA2B       | -0.19822313 | 0.23662073 | -1.49982319 |     |
| LOC441601    | -0.19822232 | 0.23662073 | -1.49981684 |     |
| QPCTL        | -0.19822459 | 0.23662073 | -1.49983471 |     |
| BATF         | -0.19819053 | 0.23671033 | -1.49956647 |     |
| MYPN         | -0.19817050 | 0.23675929 | -1.49940872 |     |
| PAQR6        | -0.19814960 | 0.23679099 | -1.49924407 |     |
| DDX46        | 0.19815032  | 0.23679099 | 1.49924976  |     |
| ARMCX6       | -0.19814149 | 0.23679872 | -1.49918023 |     |
| LOC284009    | -0.19811069 | 0.23684435 | -1.49893764 |     |
| RXFP1        | -0.19811948 | 0.23684435 | -1.49900686 |     |
| ZNF33B       | 0.19811360  | 0.23684435 | 1.49896061  | yes |
| LOC100133405 | 0.19810354  | 0.23684877 | 1.49888136  |     |
| CCND2        | -0.19808466 | 0.23689377 | -1.49873268 |     |
| ATP6VOC      | 0.19800929  | 0.23713427 | 1.49813913  |     |
| ZNF493       | 0.19796283  | 0.23726431 | 1.49777330  |     |
| HNMT         | 0.19795412  | 0.23726431 | 1.49770466  |     |
| TRPS1        | 0.19795726  | 0.23726431 | 1.49772943  |     |
| ZFP42        | -0.19794508 | 0.23727528 | -1.49763350 |     |
| FSTL4        | -0.19790223 | 0.23740336 | -1.49729608 |     |
| CENPM        | -0.19788234 | 0.23745191 | -1.49713951 |     |
| PASK         | 0.19783339  | 0.23760121 | 1.49675405  |     |
| LOC100128496 | -0.19781945 | 0.23760883 | -1.49664431 |     |
| ZNF680       | 0.19781967  | 0.23760883 | 1.49664601  |     |
| LOC100130794 | -0.19777736 | 0.23767337 | -1.49631285 |     |
| HFM1         | -0.19778521 | 0.23767337 | -1.49637472 |     |
| IGFBP6       | -0.19778241 | 0.23767337 | -1.49635265 |     |
| ATP2A3       | -0.19779215 | 0.23767337 | -1.49642936 |     |
| LOC220429    | -0.19775824 | 0.23771930 | -1.49616232 |     |
| CYP4F12      | 0.19770562  | 0.23788141 | 1.49574805  |     |
| LOC643699    | -0.19763085 | 0.23812049 | -1.49515937 |     |
| SFRS12       | 0.19760296  | 0.23817655 | 1.49493979  |     |
| ZCCHC14      | 0.19760369  | 0.23817655 | 1.49494553  |     |
| L1CAM        | -0.19758128 | 0.23823145 | -1.49476908 |     |
| FLJ20184     | 0.19756442  | 0.23826960 | 1.49463638  |     |
| HDX          | -0.19754757 | 0.23829794 | -1.49450376 |     |
| IFNW1        | -0.19754037 | 0.23829794 | -1.49444708 |     |
| NAGLU        | -0.19753419 | 0.23829794 | -1.49439837 |     |
| PLD1         | 0.19753278  | 0.23829794 | 1.49438731  |     |
| GALNT10      | -0.19752017 | 0.23832134 | -1.49428806 |     |
| TRAV13-2     | 0.19750448  | 0.23835546 | 1.49416453  |     |
| MOBP         | -0.19747551 | 0.23841533 | -1.49393643 |     |
| SDAD1        | 0.19747660  | 0.23841533 | 1.49394505  |     |
| CCDC122      | 0.19742771  | 0.23856100 | 1.49356017  |     |

|          |             |            |             |
|----------|-------------|------------|-------------|
| VEGFC    | -0.19740086 | 0.23863391 | -1.49334883 |
| RNF38    | 0.19739088  | 0.23864821 | 1.49327026  |
| C5orf35  | 0.19737311  | 0.23864881 | 1.49313034  |
| WDR37    | 0.19738358  | 0.23864881 | 1.49321274  |
| C1orf35  | -0.19737697 | 0.23864881 | -1.49316077 |
| RPL23AP7 | -0.19732436 | 0.23873172 | -1.49274661 |
| C16orf84 | -0.19732520 | 0.23873172 | -1.49275324 |
| HEATR5B  | 0.19731992  | 0.23873172 | 1.49271168  |
| SELENBP1 | 0.19732082  | 0.23873172 | 1.49271875  |
| SNORD28  | 0.19732241  | 0.23873172 | 1.49273130  |
| KRTAP5-6 | -0.19730119 | 0.23875606 | -1.49256424 |
| MORN2    | 0.19730191  | 0.23875606 | 1.49256989  |
| DUT      | 0.19729526  | 0.23875627 | 1.49251760  |
| MFSD3    | -0.19722716 | 0.23897268 | -1.49198157 |
| C17orf45 | 0.19719556  | 0.23903043 | 1.49173282  |
| FBXO15   | 0.19719795  | 0.23903043 | 1.49175166  |
| SH3RF1   | 0.19719297  | 0.23903043 | 1.49171241  |
| CLU      | -0.19716262 | 0.23911559 | -1.49147359 |
| C14orf4  | -0.19715406 | 0.23912498 | -1.49140619 |
| CYP24A1  | 0.19714135  | 0.23914881 | 1.49130615  |
| GPR146   | -0.19712450 | 0.23918703 | -1.49117355 |
| DEFB124  | -0.19707044 | 0.23934842 | -1.49074805 |
| IL13RA2  | -0.19706641 | 0.23934842 | -1.49071635 |
| TBCEL    | 0.19705086  | 0.23937857 | 1.49059397  |
| RNF213   | 0.19704602  | 0.23937857 | 1.49055588  |
| EPRS     | 0.19702227  | 0.23944085 | 1.49036899  |
| S100A2   | 0.19700844  | 0.23946860 | 1.49026013  |
| CTDSP1   | -0.19696439 | 0.23960163 | -1.48991344 |
| KIF27    | 0.19695846  | 0.23960187 | 1.48986676  |
| COQ5     | 0.19694512  | 0.23962790 | 1.48976181  |
| CTCF     | 0.19687792  | 0.23984168 | 1.48923299  |
| MRGPRD   | -0.19686385 | 0.23987029 | -1.48912227 |
| MT1G     | -0.19682996 | 0.23996803 | -1.48885557 |
| LRIG3    | 0.19679428  | 0.24007204 | 1.48857480  |
| BMP8A    | -0.19678343 | 0.24008944 | -1.48848940 |
| TUBB     | 0.19676951  | 0.24011755 | 1.48837987  |
| PGAM2    | -0.19675486 | 0.24014819 | -1.48826461 |
| FBLL1    | -0.19672369 | 0.24023648 | -1.48801940 |
| EDEM2    | 0.19671408  | 0.24024959 | 1.48794371  |
| CD79B    | -0.19667844 | 0.24035353 | -1.48766328 |
| OAF      | -0.19665057 | 0.24040989 | -1.48744400 |
| ATHL1    | -0.19665225 | 0.24040989 | -1.48745723 |
| SASS6    | 0.19663378  | 0.24042824 | 1.48731194  |
| MEIS2    | -0.19663358 | 0.24042824 | -1.48731037 |
| TTC13    | 0.19656601  | 0.24064379 | 1.48677873  |
| ZNF620   | -0.19650491 | 0.24083685 | -1.48629802 |
| STOML3   | 0.19646152  | 0.24096807 | 1.48595664  |
| CMKLR1   | -0.19644339 | 0.24101097 | -1.48581400 |
| C1orf101 | 0.19637335  | 0.24119447 | 1.48526298  |
| IFT172   | 0.19638010  | 0.24119447 | 1.48531608  |



|              |             |            |             |     |
|--------------|-------------|------------|-------------|-----|
| DCTPP1       | 0.19637520  | 0.24119447 | 1.48527752  |     |
| SNORD51      | 0.19632115  | 0.24135665 | 1.48485238  |     |
| ADCYAP1      | -0.19631096 | 0.24136697 | -1.48477224 |     |
| PHRF1        | -0.19630647 | 0.24136697 | -1.48473691 |     |
| ZNF445       | 0.19629566  | 0.24138430 | 1.48465183  |     |
| LPCAT1       | -0.19625175 | 0.24151751 | -1.48430647 |     |
| MGST3        | 0.19622136  | 0.24160343 | 1.48406741  |     |
| SELL         | -0.19617035 | 0.24174650 | -1.48366616 |     |
| KIAA0586     | 0.19616881  | 0.24174650 | 1.48365400  |     |
| NTM          | -0.19611300 | 0.24192157 | -1.48321507 |     |
| RPL36AP49    | -0.19609290 | 0.24197149 | -1.48305698 |     |
| WDR32        | 0.19596083  | 0.24241446 | 1.48201815  |     |
| ATXN2        | 0.19595359  | 0.24241926 | 1.48196123  | yes |
| MBIP         | 0.19591623  | 0.24251526 | 1.48166739  |     |
| CATSPERB     | 0.19591452  | 0.24251526 | 1.48165397  |     |
| TBC1D2       | 0.19588668  | 0.24254377 | 1.48143506  |     |
| BAX          | -0.19589098 | 0.24254377 | -1.48146887 |     |
| TGFBR1       | 0.19587707  | 0.24254377 | 1.48135943  |     |
| ZMYM1        | 0.19588053  | 0.24254377 | 1.48138664  |     |
| ABCG1        | -0.19588821 | 0.24254377 | -1.48144705 |     |
| LOC100129113 | -0.19586654 | 0.24254409 | -1.48127660 |     |
| CXorf1       | -0.19586524 | 0.24254409 | -1.48126643 |     |
| CC2D2A       | 0.19585863  | 0.24254672 | 1.48121442  |     |
| hCG_1640171  | 0.19581063  | 0.24269474 | 1.48083697  |     |
| LOC100128501 | -0.19579777 | 0.24269873 | -1.48073578 |     |
| SCRIB        | -0.19579946 | 0.24269873 | -1.48074909 |     |
| FAM131C      | -0.19578320 | 0.24272932 | -1.48062120 |     |
| RPS12        | 0.19572620  | 0.24290906 | 1.48017297  |     |
| LOC440742    | -0.19569651 | 0.24299282 | -1.47993954 |     |
| GPR114       | -0.19566793 | 0.24305090 | -1.47971481 |     |
| DTX4         | -0.19567176 | 0.24305090 | -1.47974493 |     |
| LOC284422    | -0.19566240 | 0.24305090 | -1.47967132 |     |
| PRPF19       | 0.19565055  | 0.24307198 | 1.47957808  |     |
| CALML6       | -0.19563337 | 0.24311176 | -1.47944304 |     |
| ELN          | -0.19560436 | 0.24319321 | -1.47921488 |     |
| TMEM214      | -0.19553815 | 0.24340559 | -1.47869432 |     |
| SNRNP70      | -0.19549947 | 0.24352116 | -1.47839016 |     |
| FZD1         | -0.19541088 | 0.24381262 | -1.47769368 |     |
| TRPC4        | -0.19532641 | 0.24408984 | -1.47702951 |     |
| FRMPD1       | -0.19531276 | 0.24411727 | -1.47692226 |     |
| ATG4B        | -0.19525854 | 0.24428791 | -1.47649600 |     |
| CLCA4        | 0.19521755  | 0.24441192 | 1.47617373  |     |
| FNIP1        | 0.19518164  | 0.24451802 | 1.47589141  |     |
| ZNF180       | 0.19516880  | 0.24454263 | 1.47579050  |     |
| GFER         | -0.19512435 | 0.24466146 | -1.47544110 |     |
| POLR3E       | 0.19512343  | 0.24466146 | 1.47543383  |     |
| INO80D       | 0.19501634  | 0.24501932 | 1.47459205  |     |
| LOC100133315 | 0.19500965  | 0.24502222 | 1.47453945  |     |
| SORBS2       | -0.19499327 | 0.24505939 | -1.47441071 |     |
| NMRAL1       | -0.19493956 | 0.24522865 | -1.47398860 |     |

|           |             |            |             |     |
|-----------|-------------|------------|-------------|-----|
| HSPA6     | -0.19492243 | 0.24526851 | -1.47385392 |     |
| EPHB3     | -0.19490990 | 0.24527129 | -1.47375545 |     |
| FLJ42280  | -0.19491470 | 0.24527129 | -1.47379319 |     |
| C15orf24  | 0.19487995  | 0.24535544 | 1.47352004  |     |
| SLC6A4    | -0.19487439 | 0.24535544 | -1.47347632 |     |
| MRPL32    | 0.19479947  | 0.24560000 | 1.47288747  |     |
| LARGE     | -0.19478239 | 0.24563969 | -1.47275330 |     |
| IGSF6     | -0.19476547 | 0.24567884 | -1.47262032 |     |
| IER3IP1   | 0.19472963  | 0.24576425 | 1.47233862  |     |
| DBR1      | 0.19473174  | 0.24576425 | 1.47235517  |     |
| RBM24     | 0.19470361  | 0.24581486 | 1.47213414  |     |
| KRT5      | 0.19470500  | 0.24581486 | 1.47214507  |     |
| TAS2R60   | -0.19469464 | 0.24582583 | -1.47206367 |     |
| TTC24     | -0.19465181 | 0.24593606 | -1.47172707 |     |
| IL33      | 0.19465556  | 0.24593606 | 1.47175656  |     |
| BLNK      | 0.19462116  | 0.24602392 | 1.47148623  |     |
| NCL       | 0.19461232  | 0.24603446 | 1.47141674  |     |
| LOC401127 | -0.19457684 | 0.24609786 | -1.47113788 |     |
| CDKAL1    | 0.19458134  | 0.24609786 | 1.47117328  |     |
| SPAG6     | 0.19457925  | 0.24609786 | 1.47115684  |     |
| LOC392285 | -0.19456447 | 0.24611946 | -1.47104071 |     |
| C10orf95  | -0.19455901 | 0.24611946 | -1.47099778 |     |
| WNT5B     | -0.19454321 | 0.24615468 | -1.47087365 |     |
| METTL2B   | 0.19452198  | 0.24620917 | 1.47070685  |     |
| SNRNP48   | 0.19449927  | 0.24626893 | 1.47052838  |     |
| CUL4B     | 0.19448906  | 0.24628433 | 1.47044818  |     |
| ZBBX      | 0.19448299  | 0.24628505 | 1.47040045  |     |
| LOC143188 | -0.19444797 | 0.24638853 | -1.47012524 |     |
| C16orf74  | -0.19441753 | 0.24647575 | -1.46988608 |     |
| MAD2L1BP  | 0.19438643  | 0.24656536 | 1.46964169  |     |
| NIPSNAP3B | 0.19437461  | 0.24658648 | 1.46954885  |     |
| MLC1      | -0.19426651 | 0.24686059 | -1.46869951 |     |
| ANXA5     | 0.19427315  | 0.24686059 | 1.46875165  |     |
| C1orf118  | -0.19427354 | 0.24686059 | -1.46875475 |     |
| TNAP      | -0.19427480 | 0.24686059 | -1.46876464 |     |
| RPS7      | -0.19426225 | 0.24686059 | -1.46866602 |     |
| CHST2     | -0.19428714 | 0.24686059 | -1.46886159 |     |
| OR1A2     | -0.19418587 | 0.24708582 | -1.46806592 |     |
| HAGHL     | -0.19418682 | 0.24708582 | -1.46807344 |     |
| N4BP1     | 0.19418129  | 0.24708582 | 1.46802997  | yes |
| CLEC10A   | -0.19417260 | 0.24709586 | -1.46796168 |     |
| FUT9      | -0.19415983 | 0.24709954 | -1.46786135 |     |
| PIP5K1C   | -0.19416150 | 0.24709954 | -1.46787450 |     |
| GPR15     | 0.19415368  | 0.24710052 | 1.46781310  |     |
| GALM      | 0.19412930  | 0.24716636 | 1.46762155  |     |
| HNRNP42   | 0.19406626  | 0.24736979 | 1.46712627  |     |
| FOXQ1     | -0.19404784 | 0.24741446 | -1.46698157 |     |
| GPR19     | -0.19403914 | 0.24741487 | -1.46691322 |     |
| DISP1     | 0.19403599  | 0.24741487 | 1.46688848  |     |
| CCDC17    | 0.19401095  | 0.24747166 | 1.46669177  |     |

|              |             |            |             |     |
|--------------|-------------|------------|-------------|-----|
| FLVCR2       | -0.19400830 | 0.24747166 | -1.46667096 |     |
| RERE         | -0.19394554 | 0.24767423 | -1.46617796 |     |
| PDIA4        | 0.19393346  | 0.24769636 | 1.46608306  |     |
| AFAP1L1      | -0.19390056 | 0.24772994 | -1.46582467 |     |
| MAFF         | -0.19390070 | 0.24772994 | -1.46582572 |     |
| MFNG         | -0.19390436 | 0.24772994 | -1.46585448 |     |
| WDR52        | 0.19390364  | 0.24772994 | 1.46584885  |     |
| CD1A         | -0.19389056 | 0.24774468 | -1.46574608 |     |
| MRPL45       | 0.19384842  | 0.24787390 | 1.46541509  |     |
| THAP11       | -0.19373599 | 0.24825381 | -1.46453202 |     |
| FAM124B      | -0.19372567 | 0.24826971 | -1.46445095 |     |
| CLEC9A       | -0.19369409 | 0.24836143 | -1.46420294 |     |
| DNAJB4       | 0.19367838  | 0.24837366 | 1.46407957  |     |
| CEACAM20     | -0.19367306 | 0.24837366 | -1.46403775 |     |
| S1PR3        | -0.19367880 | 0.24837366 | -1.46408287 |     |
| DGCR6        | -0.19358467 | 0.24866823 | -1.46334358 |     |
| LOC100129677 | -0.19356697 | 0.24871048 | -1.46320458 |     |
| JAM2         | -0.19355255 | 0.24874104 | -1.46309130 |     |
| SEZ6L2       | -0.19347258 | 0.24898484 | -1.46246326 |     |
| ZNF282       | -0.19347266 | 0.24898484 | -1.46246390 |     |
| ZNF639       | 0.19344373  | 0.24906698 | 1.46223673  |     |
| LOC100128398 | -0.19342191 | 0.24912399 | -1.46206541 |     |
| TAOK3        | 0.19340255  | 0.24915124 | 1.46191339  |     |
| SLC22A4      | 0.19340536  | 0.24915124 | 1.46193546  |     |
| ANO5         | -0.19339016 | 0.24915357 | -1.46181611 |     |
| PARL         | 0.19339106  | 0.24915357 | 1.46182314  |     |
| SLC7A2       | 0.19337839  | 0.24917468 | 1.46172367  |     |
| AEN          | -0.19337126 | 0.24917920 | -1.46166767 |     |
| LGI3         | -0.19336141 | 0.24919343 | -1.46159035 |     |
| PKHD1L1      | -0.19334902 | 0.24921676 | -1.46149305 | yes |
| TMPRSS11A    | 0.19333064  | 0.24926151 | 1.46134873  |     |
| P4HA2        | 0.19332294  | 0.24926809 | 1.46128820  |     |
| COQ2         | 0.19327243  | 0.24942779 | 1.46089159  |     |
| ZNF69        | -0.19321343 | 0.24961793 | -1.46042836 |     |
| RGS10        | -0.19319299 | 0.24962810 | -1.46026784 |     |
| VEZF1        | 0.19319794  | 0.24962810 | 1.46030671  |     |
| IPO13        | 0.19320367  | 0.24962810 | 1.46035170  |     |
| RAB33A       | -0.19314843 | 0.24976664 | -1.45991798 |     |
