# Supplementary material
Source: HighWire-hosted journal article supplement (https://erj.ersjournals.com/content/52/3/1701556)
Supplement: inline-supplementary-material-5 [file inline-supplementary-material-5.pdf]

**Table S7: CMH-associated mRNAs in the microarray dataset that were core-enriched in the ranked list of the RNA-seq dataset**

| gene     | gene ID         | mRNAs higher expressed with CMH<br>that were positively core-enriched in the ranked list |              | mRNAs lower expressed with CMH<br>that were negatively core-enriched in the ranked list |              |
|----------|-----------------|------------------------------------------------------------------------------------------|--------------|-----------------------------------------------------------------------------------------|--------------|
|          |                 | definition A                                                                             | definition B | definition A                                                                            | definition B |
| AIG1     | ENSG00000146416 | yes                                                                                      | no           | no                                                                                      | no           |
| LRRC8B   | ENSG00000197147 | yes                                                                                      | yes          | no                                                                                      | no           |
| ROD1     | ENSG00000119314 | yes                                                                                      | yes          | no                                                                                      | no           |
| OSBPL3   | ENSG00000070882 | yes                                                                                      | no           | no                                                                                      | no           |
| RC3H1    | ENSG00000135870 | yes                                                                                      | yes          | no                                                                                      | no           |
| RQCD1    | ENSG00000144580 | no                                                                                       | no           | no                                                                                      | no           |
| LIAS     | ENSG00000121897 | yes                                                                                      | yes          | no                                                                                      | no           |
| USP46    | ENSG00000109189 | yes                                                                                      | yes          | no                                                                                      | no           |
| MTF1     | ENSG00000188786 | yes                                                                                      | no           | no                                                                                      | no           |
| CSNK1A1  | ENSG00000113712 | yes                                                                                      | yes          | no                                                                                      | no           |
| ZDHHC13  | ENSG00000177054 | yes                                                                                      | yes          | no                                                                                      | no           |
| MARVELD2 | ENSG00000274671 | no                                                                                       | no           | no                                                                                      | no           |
| FAM60A   | ENSG00000139146 | yes                                                                                      | yes          | no                                                                                      | no           |
| NEBL     | ENSG00000078114 | yes                                                                                      | yes          | no                                                                                      | no           |
| HNRNPF   | ENSG00000169813 | yes                                                                                      | no           | no                                                                                      | no           |
| WDR45L   | ENSG00000141580 | yes                                                                                      | no           | no                                                                                      | no           |
| ADAT1    | ENSG00000065457 | yes                                                                                      | yes          | no                                                                                      | no           |
| SRI      | ENSG00000075142 | yes                                                                                      | no           | no                                                                                      | no           |
| SS18     | ENSG00000141380 | yes                                                                                      | no           | no                                                                                      | no           |
| TTC39C   | ENSG00000168234 | no                                                                                       | no           | no                                                                                      | no           |
| LRBA     | ENSG00000198589 | yes                                                                                      | yes          | no                                                                                      | no           |
| WDR51B   | ENSG00000139323 | yes                                                                                      | yes          | no                                                                                      | no           |
| TMEM14B  | ENSG00000137210 | yes                                                                                      | no           | no                                                                                      | no           |
| KATNA1   | ENSG00000186625 | no                                                                                       | no           | no                                                                                      | no           |
| NFX1     | ENSG00000086102 | no                                                                                       | no           | no                                                                                      | no           |
| GTF2E2   | ENSG00000197265 | yes                                                                                      | yes          | no                                                                                      | no           |
| USP6NL   | ENSG00000148429 | yes                                                                                      | yes          | no                                                                                      | no           |
| POLR2H   | ENSG00000163882 | yes                                                                                      | no           | no                                                                                      | no           |

|              |                 |      |      |      |      |
|--------------|-----------------|------|------|------|------|
| AZIN1        | ENSG00000155096 | yes  | no   | no   | no   |
| FANCF        | ENSG00000183161 | yes  | no   | no   | no   |
| DYRK1A       | ENSG00000157540 | yes  | yes  | no   | no   |
| C3orf52      | ENSG00000114529 | yes  | no   | no   | no   |
| SAT1         | ENSG00000130066 | yes  | no   | no   | no   |
| IDH3A        | ENSG00000166411 | yes  | yes  | no   | no   |
| PRDM4        | ENSG00000110851 | yes  | yes  | no   | no   |
| B3GNT5       | ENSG00000176597 | yes  | no   | no   | no   |
| FLJ11506     | ENSG00000103591 | yes  | yes  | no   | no   |
| INPP4B       | ENSG00000109452 | yes  | yes  | no   | no   |
| CSNK2A1      | ENSG00000101266 | yes  | yes  | no   | no   |
| RAB28        | ENSG00000157869 | yes  | no   | no   | no   |
| KIAA0232     | ENSG00000170871 | yes  | no   | no   | no   |
| C11orf30     | ENSG00000158636 | yes  | yes  | no   | no   |
| COMMD2       | ENSG00000114744 | yes  | no   | no   | no   |
| SNX24        | ENSG00000064652 | no   | no   | no   | no   |
| MRP63        | ENSG00000173141 | yes  | yes  | no   | no   |
| NUP153       | ENSG00000124789 | no   | yes  | no   | no   |
| WDR33        | ENSG00000136709 | yes  | yes  | no   | no   |
| GFM2         | ENSG00000164347 | yes  | no   | no   | no   |
| SMG7         | ENSG00000116698 | no   | no   | no   | no   |
| LOC100133333 | N.A.            | N.A. | N.A. | N.A. | N.A. |
| CXorf39      | ENSG00000123575 | yes  | yes  | no   | no   |
| C17orf75     | ENSG00000108666 | no   | no   | no   | no   |
| H2AFY        | ENSG00000113648 | yes  | yes  | no   | no   |
| LARP5        | ENSG00000107929 | yes  | no   | no   | no   |
| MAP3K7IP3    | ENSG00000157625 | yes  | yes  | no   | no   |
| MAL2         | ENSG00000147676 | yes  | yes  | no   | no   |
| DNAJC16      | ENSG00000116138 | no   | no   | no   | no   |
| CDS1         | ENSG00000163624 | yes  | no   | no   | no   |
| PPP4R1       | ENSG00000154845 | yes  | yes  | no   | no   |
| LCOR         | ENSG00000196233 | yes  | yes  | no   | no   |
| DAPP1        | ENSG00000070190 | yes  | no   | no   | no   |

|              |                 |      |      |      |      |
|--------------|-----------------|------|------|------|------|
| DAZAP2       | ENSG00000183283 | no   | no   | no   | no   |
| SEMA3A       | ENSG00000075213 | yes  | yes  | no   | no   |
| TRIM37       | ENSG00000108395 | no   | no   | no   | no   |
| UBL3         | ENSG00000122042 | yes  | yes  | no   | no   |
| PGM2L1       | ENSG00000165434 | yes  | no   | no   | no   |
| CSTB         | ENSG00000160213 | yes  | yes  | no   | no   |
| CNOT7        | ENSG00000198791 | yes  | yes  | no   | no   |
| MRPS21       | ENSG00000266472 | yes  | no   | no   | no   |
| ERLIN1       | ENSG00000107566 | yes  | yes  | no   | no   |
| LOC100133422 | N.A.            | N.A. | N.A. | N.A. | N.A. |
| AMPD3        | ENSG00000133805 | yes  | no   | no   | no   |
| EIF5         | ENSG00000100664 | yes  | yes  | no   | no   |
| MUC15        | ENSG00000169550 | yes  | no   | no   | no   |
| TC2N         | ENSG00000165929 | yes  | yes  | no   | no   |
| MRPS31       | ENSG00000102738 | yes  | no   | no   | no   |
| USP42        | ENSG00000106346 | yes  | no   | no   | no   |
| PEX13        | ENSG00000162928 | yes  | yes  | no   | no   |
| PIGU         | ENSG00000101464 | yes  | yes  | no   | no   |
| DPY30        | ENSG00000162961 | yes  | no   | no   | no   |
| KIAA1279     | ENSG00000198954 | yes  | yes  | no   | no   |
| CAST         | ENSG00000153113 | yes  | yes  | no   | no   |
| C10orf57     | ENSG00000133678 | yes  | no   | no   | no   |
| TRIM2        | ENSG00000109654 | yes  | no   | no   | no   |
| LGALS3       | ENSG00000131981 | yes  | yes  | no   | no   |
| RAB2B        | ENSG00000129472 | no   | yes  | no   | no   |
| C9orf6       | ENSG00000119328 | yes  | no   | no   | no   |
| DAP3         | ENSG00000132676 | no   | yes  | no   | no   |
| IPMK         | ENSG00000151151 | yes  | yes  | no   | no   |
| ELF1         | ENSG00000120690 | yes  | yes  | no   | no   |
| IMPA1        | ENSG00000133731 | yes  | yes  | no   | no   |
| DOPEY1       | ENSG00000083097 | no   | yes  | no   | no   |
| TDP1         | ENSG00000042088 | yes  | no   | no   | no   |
| UTX          | ENSG00000147050 | no   | yes  | no   | no   |

|          |                 |     |     |    |    |
|----------|-----------------|-----|-----|----|----|
| FYTTD1   | ENSG00000122068 | yes | yes | no | no |
| ZNF410   | ENSG00000119725 | yes | yes | no | no |
| IPP      | ENSG00000197429 | yes | no  | no | no |
| CHD7     | ENSG00000171316 | no  | no  | no | no |
| METTL5   | ENSG00000138382 | yes | yes | no | no |
| MIS12    | ENSG00000167842 | no  | no  | no | no |
| TMEM154  | ENSG00000170006 | yes | yes | no | no |
| RPP40    | ENSG00000124787 | yes | yes | no | no |
| STAM2    | ENSG00000115145 | yes | yes | no | no |
| TAX1BP1  | ENSG00000106052 | yes | yes | no | no |
| USP10    | ENSG00000103194 | no  | no  | no | no |
| OXNAD1   | ENSG00000154814 | yes | no  | no | no |
| ABHD6    | ENSG00000163686 | yes | no  | no | no |
| CBFB     | ENSG00000067955 | yes | yes | no | no |
| EPS8     | ENSG00000151491 | yes | yes | no | no |
| VAPA     | ENSG00000101558 | yes | yes | no | no |
| DNAJA4   | ENSG00000140403 | yes | no  | no | no |
| C10orf46 | ENSG00000151893 | yes | yes | no | no |
| KRAS     | ENSG00000133703 | yes | yes | no | no |
| CCDC109A | ENSG00000156026 | yes | yes | no | no |
| ANK3     | ENSG00000151150 | no  | no  | no | no |
| LZTFL1   | ENSG00000163818 | yes | no  | no | no |
| MSL3     | ENSG00000005302 | yes | no  | no | no |
| TAF5L    | ENSG00000135801 | no  | yes | no | no |
| PCSK5    | ENSG00000099139 | yes | no  | no | no |
| PARD6B   | ENSG00000124171 | yes | no  | no | no |
| TOMM34   | ENSG00000025772 | yes | no  | no | no |
| WDR26    | ENSG00000162923 | yes | yes | no | no |
| VDAC3    | ENSG00000078668 | yes | no  | no | no |
| RTCD1    | ENSG00000137996 | yes | yes | no | no |
| C1orf25  | ENSG00000121486 | yes | no  | no | no |
| CBLB     | ENSG00000114423 | yes | yes | no | no |
| HIPK3    | ENSG00000110422 | yes | yes | no | no |

|          |                 |     |     |    |    |
|----------|-----------------|-----|-----|----|----|
| PLAC8    | ENSG00000145287 | yes | no  | no | no |
| GLIPR2   | ENSG00000122694 | yes | no  | no | no |
| FAM149B1 | ENSG00000138286 | yes | no  | no | no |
| KIAA1012 | ENSG00000153339 | yes | yes | no | no |
| BTBD9    | ENSG00000183826 | yes | no  | no | no |
| PSD3     | ENSG00000156011 | yes | yes | no | no |
| MRPL39   | ENSG00000154719 | yes | yes | no | no |
| KIAA2018 | ENSG00000176542 | yes | yes | no | no |
| TDRD7    | ENSG00000196116 | yes | yes | no | no |
| SLC15A2  | ENSG00000163406 | yes | no  | no | no |
| RALGPS2  | ENSG00000116191 | yes | yes | no | no |
| ATXN2    | ENSG00000204842 | no  | no  | no | no |
| ANXA2    | ENSG00000182718 | yes | yes | no | no |
| SOD1     | ENSG00000142168 | yes | no  | no | no |
| SFMBT1   | ENSG00000163935 | yes | yes | no | no |
| MRPS10   | ENSG00000048544 | yes | yes | no | no |
| QRSL1    | ENSG00000130348 | yes | yes | no | no |
| USP9Y    | ENSG00000114374 | yes | no  | no | no |
| ALPK1    | ENSG00000073331 | no  | no  | no | no |
| USP38    | ENSG00000170185 | yes | yes | no | no |
| RP2      | ENSG00000102218 | no  | yes | no | no |
| C1orf110 | ENSG00000185860 | yes | no  | no | no |
| MOCS3    | ENSG00000124217 | no  | no  | no | no |
| JHDM1D   | ENSG00000006459 | yes | yes | no | no |
| KIAA0317 | ENSG00000119682 | no  | yes | no | no |
| KIAA1468 | ENSG00000134444 | yes | yes | no | no |
| RNF2     | ENSG00000121481 | yes | yes | no | no |
| CCNY     | ENSG00000108100 | no  | no  | no | no |
| ASCC1    | ENSG00000138303 | no  | no  | no | no |
| MYB      | ENSG00000118513 | yes | no  | no | no |
| ZNF823   | ENSG00000197933 | no  | yes | no | no |
| ASXL2    | ENSG00000143970 | yes | yes | no | no |
| STRBP    | ENSG00000165209 | yes | no  | no | no |

|         |                 |     |     |    |    |
|---------|-----------------|-----|-----|----|----|
| IKZF2   | ENSG00000030419 | yes | yes | no | no |
| DLAT    | ENSG00000150768 | yes | yes | no | no |
| EZR     | ENSG00000092820 | yes | no  | no | no |
| RNF6    | ENSG00000127870 | yes | yes | no | no |
| EIF4G2  | ENSG00000110321 | no  | yes | no | no |
| TRIP4   | ENSG00000103671 | no  | no  | no | no |
| PIGF    | ENSG00000151665 | yes | yes | no | no |
| ZNF33B  | ENSG00000196693 | yes | yes | no | no |
| SKP2    | ENSG00000145604 | yes | no  | no | no |
| OMA1    | ENSG00000162600 | yes | no  | no | no |
| MED6    | ENSG00000133997 | yes | yes | no | no |
| PBRM1   | ENSG00000163939 | no  | yes | no | no |
| ADIPOR1 | ENSG00000159346 | no  | no  | no | no |
| ECHDC1  | ENSG00000093144 | yes | yes | no | no |
| N4BP1   | ENSG00000102921 | yes | yes | no | no |
| THRAP3  | ENSG00000054118 | no  | no  | no | no |
| WDR47   | ENSG00000085433 | yes | no  | no | no |
| VTA1    | ENSG00000009844 | yes | yes | no | no |
| HECTD1  | ENSG00000092148 | yes | yes | no | no |
| TMEM131 | ENSG00000075568 | yes | no  | no | no |
| NUFIP2  | ENSG00000108256 | yes | yes | no | no |
| DHRS9   | ENSG00000073737 | yes | yes | no | no |
| CNOT1   | ENSG00000125107 | yes | yes | no | no |
| TTC39B  | ENSG00000155158 | yes | yes | no | no |
| GOLPH3L | ENSG00000143457 | yes | yes | no | no |
| C2orf86 | ENSG00000143951 | yes | no  | no | no |
| CCDC138 | ENSG00000163006 | yes | no  | no | no |
| YWHAE   | ENSG00000108953 | yes | yes | no | no |
| HSPA4L  | ENSG00000164070 | yes | yes | no | no |
| HSBP1   | ENSG00000230989 | yes | yes | no | no |
| INADL   | ENSG00000132849 | no  | yes | no | no |
| RICS    | ENSG00000134909 | yes | yes | no | no |
| AFTPH   | ENSG00000119844 | yes | yes | no | no |

|          |                 |     |     |    |    |
|----------|-----------------|-----|-----|----|----|
| GCLC     | ENSG0000001084  | yes | yes | no | no |
| CBLL1    | ENSG00000105879 | yes | yes | no | no |
| TMEM220  | ENSG00000187824 | yes | no  | no | no |
| NQO1     | ENSG00000181019 | yes | yes | no | no |
| ABII     | ENSG00000136754 | yes | yes | no | no |
| RAB11A   | ENSG00000103769 | yes | yes | no | no |
| CHMP5    | ENSG00000086065 | yes | yes | no | no |
| NUPL1    | ENSG00000139496 | yes | yes | no | no |
| APTX     | ENSG00000137074 | no  | yes | no | no |
| MLLT4    | ENSG00000130396 | no  | no  | no | no |
| MUDENG   | ENSG00000053770 | yes | yes | no | no |
| TMOD3    | ENSG00000138594 | yes | yes | no | no |
| FRK      | ENSG00000111816 | yes | yes | no | no |
| MAK10    | ENSG00000135040 | yes | yes | no | no |
| ZNF607   | ENSG00000198182 | yes | no  | no | no |
| IFT52    | ENSG00000101052 | yes | no  | no | no |
| ARID2    | ENSG00000189079 | yes | yes | no | no |
| SEC23IP  | ENSG00000107651 | no  | yes | no | no |
| TGFA     | ENSG00000163235 | yes | yes | no | no |
| EVI1     | ENSG00000085276 | yes | yes | no | no |
| PDIK1L   | ENSG00000175087 | yes | yes | no | no |
| TET2     | ENSG00000168769 | yes | yes | no | no |
| BTBD1    | ENSG00000064726 | yes | yes | no | no |
| PTGR1    | ENSG00000106853 | yes | yes | no | no |
| RMND5A   | ENSG00000153561 | yes | yes | no | no |
| IVNS1ABP | ENSG00000116679 | yes | yes | no | no |
| HEBP2    | ENSG00000051620 | yes | yes | no | no |
| KLHDC10  | ENSG00000128607 | no  | no  | no | no |
| TRIP13   | ENSG00000071539 | yes | no  | no | no |
| BAZ1A    | ENSG00000198604 | yes | yes | no | no |
| TTC9C    | ENSG00000162222 | no  | yes | no | no |
| CHMP2B   | ENSG00000083937 | yes | yes | no | no |
| ZNF398   | ENSG00000197024 | no  | yes | no | no |

|           |                 |      |      |      |      |
|-----------|-----------------|------|------|------|------|
| POLR1C    | ENSG00000171453 | no   | yes  | no   | no   |
| BRP44     | ENSG00000143158 | yes  | no   | no   | no   |
| S100A11   | ENSG00000163191 | yes  | yes  | no   | no   |
| LOC552889 | N.A.            | N.A. | N.A. | N.A. | N.A. |
| MORF4L2   | ENSG00000123562 | no   | yes  | no   | no   |
| EXPH5     | ENSG00000110723 | yes  | yes  | no   | no   |
| LASS6     | ENSG00000172292 | yes  | yes  | no   | no   |
| ZNF561    | ENSG00000171469 | yes  | yes  | no   | no   |
| NBEAL1    | ENSG00000144426 | yes  | yes  | no   | no   |
| HCCS      | ENSG00000004961 | no   | yes  | no   | no   |
| BAIAP2L1  | ENSG00000006453 | no   | no   | no   | no   |
| ANXA4     | ENSG00000196975 | yes  | no   | no   | no   |
| SGMS2     | ENSG00000164023 | yes  | yes  | no   | no   |
| EIF4G3    | ENSG00000075151 | no   | no   | no   | no   |
| FBXO28    | ENSG00000143756 | yes  | yes  | no   | no   |
| CNOT6     | ENSG00000113300 | yes  | yes  | no   | no   |
| DHX32     | ENSG00000089876 | no   | no   | no   | no   |
| CLIP1     | ENSG00000130779 | yes  | yes  | no   | no   |
| SAPS3     | ENSG00000110075 | yes  | yes  | no   | no   |
| POLR3C    | ENSG00000186141 | no   | yes  | no   | no   |
| OTUD4     | ENSG00000164164 | yes  | no   | no   | no   |
| ANXA2P2   | ENSG00000231991 | no   | yes  | no   | no   |
| SPAG1     | ENSG00000104450 | yes  | no   | no   | no   |
| TLE4      | ENSG00000106829 | no   | no   | no   | no   |
| TTLL5     | ENSG00000119685 | yes  | no   | no   | no   |
| PRKAR2A   | ENSG00000114302 | no   | yes  | no   | no   |
| NEK4      | ENSG00000114904 | yes  | no   | no   | no   |
| SLMO2     | ENSG00000101166 | yes  | yes  | no   | no   |
| GSK3B     | ENSG00000082701 | yes  | yes  | no   | no   |
| ZNF507    | ENSG00000168813 | no   | yes  | no   | no   |
| DDX3X     | ENSG00000215301 | yes  | yes  | no   | no   |
| SECISBP2  | ENSG00000187742 | yes  | no   | no   | no   |
| PAPOLA    | ENSG00000090060 | yes  | yes  | no   | no   |



|              |                 |      |      |      |      |
|--------------|-----------------|------|------|------|------|
| MYO6         | ENSG00000196586 | yes  | yes  | no   | no   |
| PDCD6IP      | ENSG00000170248 | yes  | yes  | no   | no   |
| VRK2         | ENSG00000028116 | yes  | yes  | no   | no   |
| C1orf58      | ENSG00000162819 | yes  | yes  | no   | no   |
| NXT2         | ENSG00000101888 | yes  | yes  | no   | no   |
| TESC         | ENSG00000088992 | no   | no   | yes  | no   |
| ZNF775       | ENSG00000196456 | no   | no   | no   | no   |
| ADAD2        | ENSG00000140955 | no   | no   | no   | no   |
| MRGPRF       | ENSG00000172935 | no   | no   | yes  | yes  |
| VASN         | ENSG00000274334 | no   | no   | no   | no   |
| PLXND1       | ENSG00000004399 | no   | no   | yes  | yes  |
| NAPSA        | ENSG00000131400 | no   | no   | no   | no   |
| C1QTNF5      | ENSG00000223953 | no   | no   | no   | no   |
| LOC100132755 | N.A.            | N.A. | N.A. | N.A. | N.A. |
| FAM70B       | ENSG00000184497 | no   | no   | yes  | yes  |
| PARVB        | ENSG00000188677 | no   | no   | no   | yes  |
| SLC26A3      | ENSG00000091138 | no   | no   | no   | no   |
| INMT         | ENSG00000241644 | no   | no   | no   | yes  |
| CDR2L        | ENSG00000109089 | no   | no   | no   | no   |
| MYO7B        | ENSG00000169994 | no   | no   | no   | no   |
| PTGER1       | ENSG00000160951 | no   | no   | no   | no   |
| GPR124       | ENSG00000020181 | no   | no   | no   | yes  |
| EXD3         | ENSG00000187609 | no   | no   | no   | yes  |
| EMILIN3      | ENSG00000183798 | no   | no   | no   | no   |
| NRTN         | ENSG00000171119 | no   | no   | no   | no   |
| LCN10        | ENSG00000187922 | no   | no   | no   | no   |
| TAL1         | ENSG00000162367 | no   | no   | yes  | yes  |
| TMEM38A      | ENSG00000072954 | no   | no   | yes  | yes  |
| GNB5         | ENSG00000069966 | no   | no   | no   | no   |
| FLJ42957     | N.A.            | N.A. | N.A. | N.A. | N.A. |
| FAM9C        | ENSG00000187268 | no   | no   | no   | no   |
| LPAR4        | ENSG00000147145 | no   | no   | no   | no   |
| LOC100133397 | N.A.            | N.A. | N.A. | N.A. | N.A. |

|             |                 |    |    |     |     |
|-------------|-----------------|----|----|-----|-----|
| NFATC4      | ENSG00000100968 | no | no | no  | yes |
| TUBB6       | ENSG00000176014 | no | no | no  | no  |
| PTMS        | ENSG00000159335 | no | no | yes | no  |
| FAM69B      | ENSG00000165716 | no | no | yes | yes |
| KLHL34      | ENSG00000185915 | no | no | no  | no  |
| NUP210L     | ENSG00000143552 | no | no | yes | yes |
| NPFFR1      | ENSG00000148734 | no | no | no  | no  |
| SNORD114-3  | ENSG00000201839 | no | no | no  | no  |
| SH3BP2      | ENSG00000087266 | no | no | yes | no  |
| C11orf20    | ENSG00000219435 | no | no | no  | no  |
| GDNF        | ENSG00000168621 | no | no | no  | no  |
| IL2RA       | ENSG00000134460 | no | no | no  | yes |
| FEZ1        | ENSG00000149557 | no | no | yes | no  |
| DSCR6       | ENSG00000183145 | no | no | no  | no  |
| PCBP4       | ENSG00000090097 | no | no | yes | yes |
| EBF3        | ENSG00000108001 | no | no | yes | yes |
| SNORD116-25 | ENSG00000252326 | no | no | no  | no  |
| SRV         | ENSG00000184895 | no | no | no  | no  |
| CHRD        | ENSG00000090539 | no | no | yes | yes |
| TTYH1       | ENSG00000167614 | no | no | yes | yes |
| LRRN3       | ENSG00000173114 | no | no | no  | yes |
| SEMA3G      | ENSG00000010319 | no | no | yes | yes |
| DHH         | ENSG00000139549 | no | no | no  | no  |
| ZNF358      | ENSG00000198816 | no | no | yes | yes |
| RCOR2       | ENSG00000167771 | no | no | no  | no  |
| FAM43A      | ENSG00000185112 | no | no | no  | no  |
| SMTN        | ENSG00000183963 | no | no | yes | yes |
| TNFRSF18    | ENSG00000186891 | no | no | no  | no  |
| ROBO4       | ENSG00000154133 | no | no | yes | yes |
| SLC45A1     | ENSG00000162426 | no | no | no  | no  |
| UAP1L1      | ENSG00000197355 | no | no | yes | yes |
| IRF2BP1     | ENSG00000170604 | no | no | no  | no  |
| FBXO43      | ENSG00000156509 | no | no | yes | yes |

|              |                 |      |      |      |      |
|--------------|-----------------|------|------|------|------|
| PKHD1L1      | ENSG00000205038 | no   | no   | no   | no   |
| SPNS2        | ENSG00000183018 | no   | no   | no   | no   |
| CCDC50       | ENSG00000152492 | no   | no   | no   | no   |
| SPTB         | ENSG00000070182 | no   | no   | yes  | yes  |
| COL6A1       | ENSG00000142156 | no   | no   | yes  | yes  |
| SERPINA3     | ENSG00000196136 | no   | no   | yes  | no   |
| EGFL7        | ENSG00000172889 | no   | no   | yes  | yes  |
| LOC100133142 | N.A.            | N.A. | N.A. | N.A. | N.A. |
| HEXDC        | ENSG00000169660 | no   | no   | yes  | yes  |
| UNC45B       | ENSG00000141161 | no   | no   | yes  | yes  |
| KLHL4        | ENSG00000102271 | no   | no   | no   | yes  |
| SPSB4        | ENSG00000175093 | no   | no   | no   | no   |
| EBF1         | ENSG00000164330 | no   | no   | yes  | yes  |
| LOC100130518 | N.A.            | N.A. | N.A. | N.A. | N.A. |
| SNTA1        | ENSG00000101400 | no   | no   | yes  | no   |
| C9orf4       | ENSG00000260230 | no   | no   | no   | yes  |
| DAAM2        | ENSG00000146122 | no   | no   | yes  | yes  |
| HSD17B14     | ENSG00000087076 | no   | no   | no   | yes  |
| SCARNA4      | ENSG00000281516 | no   | no   | no   | no   |
| DBN1         | ENSG00000113758 | no   | no   | yes  | no   |
| ACTRT2       | ENSG00000169717 | no   | no   | no   | no   |
| PLVAP        | ENSG00000130300 | no   | no   | yes  | yes  |
| MRC2         | ENSG00000011028 | no   | no   | yes  | yes  |
| SGK493       | ENSG00000162878 | no   | no   | yes  | yes  |
| FLJ46838     | N.A.            | N.A. | N.A. | N.A. | N.A. |
| GRASP        | ENSG00000161835 | no   | no   | yes  | yes  |
| MN1          | ENSG00000169184 | no   | no   | no   | yes  |
| GEFT         | ENSG00000240771 | no   | no   | yes  | yes  |
| EFEMP2       | ENSG00000172638 | no   | no   | yes  | yes  |
| PCP2         | ENSG00000174788 | no   | no   | no   | no   |
| MPP2         | ENSG00000108852 | no   | no   | no   | yes  |
| CLEC14A      | ENSG00000176435 | no   | no   | yes  | yes  |
| EDA          | ENSG00000158813 | no   | no   | yes  | yes  |

|           |                 |    |    |     |     |
|-----------|-----------------|----|----|-----|-----|
| ENPEP     | ENSG00000138792 | no | no | yes | no  |
| GLI1      | ENSG00000111087 | no | no | yes | yes |
| CRTC1     | ENSG00000105662 | no | no | no  | yes |
| SMARCD3   | ENSG00000082014 | no | no | yes | no  |
| SLC17A7   | ENSG00000104888 | no | no | no  | no  |
| LOC124220 | ENSG00000162078 | no | no | yes | yes |
| CD22      | ENSG00000012124 | no | no | yes | yes |
| OPRK1     | ENSG00000082556 | no | no | no  | no  |
| FBXO44    | ENSG00000132879 | no | no | yes | yes |
| REN       | ENSG00000143839 | no | no | no  | no  |
| ProSAPiP1 | ENSG00000088899 | no | no | yes | yes |
| SNORA20   | ENSG00000201660 | no | no | no  | no  |
| GGTLC1    | ENSG00000149435 | no | no | no  | no  |
| LMCD1     | ENSG00000071282 | no | no | yes | no  |
| NPPB      | ENSG00000120937 | no | no | no  | no  |
| SLC6A17   | ENSG00000197106 | no | no | yes | yes |
| KIAA0427  | ENSG00000134030 | no | no | yes | yes |
| KIAA1045  | ENSG00000122733 | no | no | no  | no  |
| ADAMTSL1  | ENSG00000178031 | no | no | yes | yes |
| PGF       | ENSG00000119630 | no | no | no  | yes |
| RAPGEF3   | ENSG00000079337 | no | no | yes | yes |
| REXO1     | ENSG00000079313 | no | no | no  | yes |
| GALNTL1   | ENSG00000100626 | no | no | yes | yes |
| NENF      | ENSG00000117691 | no | no | yes | no  |
| ADRA2C    | ENSG00000184160 | no | no | no  | no  |
| NRGN      | ENSG00000154146 | no | no | no  | no  |
| TUBB2B    | ENSG00000137285 | no | no | no  | no  |
| TRIM54    | ENSG00000138100 | no | no | no  | no  |
| VWA1      | ENSG00000179403 | no | no | yes | yes |
| LRRC4B    | ENSG00000131409 | no | no | no  | no  |
| CLTCL1    | ENSG00000070371 | no | no | yes | no  |
| RASL10B   | ENSG00000270885 | no | no | no  | no  |
| DLK2      | ENSG00000171462 | no | no | yes | yes |

|          |                 |    |    |     |     |
|----------|-----------------|----|----|-----|-----|
| TMEM150  | ENSG00000168890 | no | no | yes | no  |
| NPDC1    | ENSG00000107281 | no | no | yes | yes |
| CRH      | ENSG00000147571 | no | no | no  | no  |
| SLC26A10 | ENSG00000135502 | no | no | yes | yes |
| DGKG     | ENSG00000058866 | no | no | yes | yes |
| OR2B11   | ENSG00000177535 | no | no | no  | no  |
| PKN3     | ENSG00000160447 | no | no | no  | yes |
| ART4     | ENSG00000111339 | no | no | no  | no  |
| METTL7B  | ENSG00000170439 | no | no | no  | no  |
| USHBP1   | ENSG00000130307 | no | no | yes | yes |
| RNASE1   | ENSG00000129538 | no | no | yes | no  |
| CLEC11A  | ENSG00000105472 | no | no | no  | yes |
| FAM65A   | ENSG00000039523 | no | no | yes | yes |
| ITGA7    | ENSG00000135424 | no | no | yes | yes |
| ADAMTS10 | ENSG00000142303 | no | no | yes | yes |
| GNAO1    | ENSG00000087258 | no | no | yes | yes |
| NFE2     | ENSG00000123405 | no | no | no  | no  |
| CLDN11   | ENSG00000013297 | no | no | yes | yes |
| BLOC1S3  | ENSG00000189114 | no | no | no  | yes |
| A1BG     | ENSG00000121410 | no | no | no  | no  |
| ADCY1    | ENSG00000164742 | no | no | yes | yes |
| HAS1     | ENSG00000105509 | no | no | no  | no  |
| COL4A1   | ENSG00000187498 | no | no | yes | yes |
| HOXC12   | ENSG00000123407 | no | no | no  | no  |
| TGFB1I1  | ENSG00000140682 | no | no | yes | yes |
| ARL10    | ENSG00000175414 | no | no | no  | no  |
| JPH2     | ENSG00000149596 | no | no | yes | yes |
| C9orf142 | ENSG00000148362 | no | no | no  | yes |
| CDX1     | ENSG00000113722 | no | no | no  | no  |
| EPHB1    | ENSG00000154928 | no | no | yes | yes |
| TRPV2    | ENSG00000187688 | no | no | no  | yes |
| HOXD4    | ENSG00000170166 | no | no | no  | no  |
| FAM71A   | ENSG00000162771 | no | no | no  | no  |

|           |                 |      |      |      |      |
|-----------|-----------------|------|------|------|------|
| SPEG      | ENSG00000072195 | no   | no   | yes  | yes  |
| DLX2      | ENSG00000115844 | no   | no   | no   | no   |
| THY1      | ENSG00000154096 | no   | no   | yes  | yes  |
| MAP3K11   | ENSG00000173327 | no   | no   | no   | yes  |
| LCN6      | ENSG00000267206 | no   | no   | no   | no   |
| PITPNM2   | ENSG00000090975 | no   | no   | yes  | no   |
| SELM      | ENSG00000198832 | no   | no   | yes  | yes  |
| SEMA6B    | ENSG00000167680 | no   | no   | yes  | yes  |
| PTRF      | ENSG00000177469 | no   | no   | yes  | yes  |
| PDLIM7    | ENSG00000196923 | no   | no   | yes  | yes  |
| CLEC3B    | ENSG00000163815 | no   | no   | yes  | yes  |
| SPTA1     | ENSG00000163554 | no   | no   | no   | no   |
| GDF11     | ENSG00000135414 | no   | no   | yes  | no   |
| FBXO10    | ENSG00000147912 | no   | no   | yes  | yes  |
| HES3      | ENSG00000173673 | no   | no   | no   | no   |
| CRHBP     | ENSG00000145708 | no   | no   | no   | no   |
| HOXB6     | ENSG00000108511 | no   | no   | no   | yes  |
| RAMP1     | ENSG00000132329 | no   | no   | yes  | yes  |
| WFDC1     | ENSG00000103175 | no   | no   | yes  | yes  |
| RPL23AP71 | ENSG00000237450 | no   | no   | no   | no   |
| COL4A2    | ENSG00000134871 | no   | no   | yes  | yes  |
| ADRA1A    | ENSG00000120907 | no   | no   | yes  | no   |
| PNCK      | ENSG00000130822 | no   | no   | yes  | yes  |
| MAPK11    | ENSG00000185386 | no   | no   | yes  | yes  |
| FSTL3     | ENSG00000070404 | no   | no   | yes  | no   |
| DYSF      | ENSG00000135636 | no   | no   | yes  | yes  |
| CCDC9     | ENSG00000105321 | no   | no   | no   | no   |
| SETD1B    | ENSG00000139718 | no   | no   | no   | yes  |
| PLAC9     | ENSG00000189129 | no   | no   | yes  | yes  |
| PP13004   | N.A.            | N.A. | N.A. | N.A. | N.A. |
| SPHK1     | ENSG00000176170 | no   | no   | yes  | no   |
| SHROOM4   | ENSG00000158352 | no   | no   | yes  | yes  |
| PLXNB3    | ENSG00000198753 | no   | no   | yes  | no   |

|           |                 |    |    |     |     |
|-----------|-----------------|----|----|-----|-----|
| SNX15     | ENSG00000110025 | no | no | no  | yes |
| C8orf82   | ENSG00000213563 | no | no | no  | no  |
| NME4      | ENSG00000103202 | no | no | yes | yes |
| GAL3ST4   | ENSG00000197093 | no | no | yes | yes |
| CARD10    | ENSG00000100065 | no | no | yes | yes |
| TBC1D4    | ENSG00000136111 | no | no | no  | no  |
| COPZ2     | ENSG00000005243 | no | no | yes | no  |
| PLK5P     | ENSG00000185988 | no | no | no  | no  |
| GGT5      | ENSG00000099998 | no | no | yes | yes |
| LEPRE1    | ENSG00000117385 | no | no | no  | no  |
| SYDE1     | ENSG00000105137 | no | no | yes | yes |
| CDH23     | ENSG00000107736 | no | no | no  | no  |
| CCDC141   | ENSG00000163492 | no | no | no  | yes |
| DPF3      | ENSG00000205683 | no | no | yes | no  |
| C20orf160 | ENSG00000101331 | no | no | no  | yes |
| COL8A2    | ENSG00000171812 | no | no | yes | yes |
| PPP1R12C  | ENSG00000125503 | no | no | yes | yes |
| FRAT1     | ENSG00000165879 | no | no | no  | no  |
| F2RL3     | ENSG00000127533 | no | no | no  | no  |
| CHST10    | ENSG00000115526 | no | no | yes | no  |
| FLT4      | ENSG00000037280 | no | no | yes | yes |
| ACVRL1    | ENSG00000139567 | no | no | yes | yes |
| FAM101B   | ENSG00000183688 | no | no | no  | no  |
| EVX2      | ENSG00000174279 | no | no | no  | no  |
| RASL12    | ENSG00000103710 | no | no | yes | yes |
| ARPP-21   | ENSG00000172995 | no | no | no  | yes |
| COL6A2    | ENSG00000142173 | no | no | yes | yes |
| TLN2      | ENSG00000171914 | no | no | yes | no  |
| UNKL      | ENSG00000059145 | no | no | no  | yes |
| SLC22A17  | ENSG00000092096 | no | no | yes | no  |
| TBX2      | ENSG00000121068 | no | no | yes | yes |
| GPD1      | ENSG00000167588 | no | no | yes | no  |
| CNTNAP1   | ENSG00000108797 | no | no | yes | yes |

|              |                 |      |      |      |      |
|--------------|-----------------|------|------|------|------|
| IL34         | ENSG00000157368 | no   | no   | no   | yes  |
| TNFRSF10D    | ENSG00000173530 | no   | no   | yes  | no   |
| ST3GAL2      | ENSG00000157350 | no   | no   | yes  | yes  |
| LOC375295    | N.A.            | N.A. | N.A. | N.A. | N.A. |
| MEP1B        | ENSG00000141434 | no   | no   | no   | no   |
| ADAM33       | ENSG00000149451 | no   | no   | yes  | yes  |
| SHANK3       | ENSG00000251322 | no   | no   | yes  | yes  |
| RASIP1       | ENSG00000105538 | no   | no   | yes  | yes  |
| DOK1         | ENSG00000115325 | no   | no   | no   | no   |
| TPO          | ENSG00000115705 | no   | no   | yes  | no   |
| SLC25A42     | ENSG00000181035 | no   | no   | yes  | yes  |
| COL5A1       | ENSG00000130635 | no   | no   | yes  | yes  |
| SEPT4        | ENSG00000108387 | no   | no   | yes  | yes  |
| LIX1L        | ENSG00000271601 | no   | no   | yes  | no   |
| NES          | ENSG00000132688 | no   | no   | yes  | yes  |
| FBRSL1       | ENSG00000112787 | no   | no   | no   | yes  |
| RUSC2        | ENSG00000198853 | no   | no   | yes  | yes  |
| REG1A        | ENSG00000115386 | no   | no   | no   | no   |
| FADS3        | ENSG00000221968 | no   | no   | yes  | yes  |
| GUCA1A       | ENSG00000048545 | no   | no   | no   | no   |
| FLJ10404     | ENSG00000146067 | no   | no   | yes  | yes  |
| LOC100133404 | N.A.            | N.A. | N.A. | N.A. | N.A. |
| ACHE         | ENSG00000087085 | no   | no   | no   | no   |
| FKBP10       | ENSG00000141756 | no   | no   | yes  | yes  |
| XKR6         | ENSG00000171044 | no   | no   | no   | no   |
| LOC401097    | N.A.            | N.A. | N.A. | N.A. | N.A. |
| SLC2A6       | ENSG00000160326 | no   | no   | no   | yes  |
| TRAM1L1      | ENSG00000174599 | no   | no   | no   | yes  |
| SNAPC2       | ENSG00000104976 | no   | no   | no   | no   |
| LSM11        | ENSG00000155858 | no   | no   | no   | no   |
| PEAR1        | ENSG00000187800 | no   | no   | yes  | yes  |
| PDE9A        | ENSG00000160191 | no   | no   | no   | no   |
| RASGRP2      | ENSG00000068831 | no   | no   | yes  | yes  |



|              |                 |      |      |      |      |
|--------------|-----------------|------|------|------|------|
| ARHGEF15     | ENSG00000198844 | no   | no   | yes  | yes  |
| SLCO4A1      | ENSG00000101187 | no   | no   | yes  | no   |
| SCARNA16     | ENSG00000252404 | no   | no   | no   | no   |
| RGS11        | ENSG00000076344 | no   | no   | yes  | yes  |
| HTRA1        | ENSG00000166033 | no   | no   | yes  | yes  |
| EDN1         | ENSG00000078401 | no   | no   | yes  | no   |
| C15orf60     | ENSG00000183324 | no   | no   | no   | no   |
| PDGFB        | ENSG00000100311 | no   | no   | yes  | yes  |
| BTN2A3       | ENSG00000124549 | no   | no   | no   | no   |
| LIMS2        | ENSG00000072163 | no   | no   | yes  | yes  |
| WTIP         | ENSG00000142279 | no   | no   | yes  | yes  |
| RPL23AP64    | ENSG00000240970 | no   | no   | no   | no   |
| C1QTNF1      | ENSG00000173918 | no   | no   | yes  | yes  |
| FAM115A      | ENSG00000198420 | no   | no   | yes  | no   |
| NKD1         | ENSG00000140807 | no   | no   | yes  | yes  |
| LOC100133388 | N.A.            | N.A. | N.A. | N.A. | N.A. |

---
